# Supplementary material for: Fexinidazole – A New Oral Nitroimidazole Drug Candidate Entering Clinical Development for the Treatment of Sleeping Sickness
Source: PLoS Negl Trop Dis. 2010 Dec 21;4(12):e923. doi: 10.1371/journal.pntd.0000923 (PMC3006138; doi:10.1371/journal.pntd.0000923)

**Fexinidazole: Evaluation of the Pharmacokinetics and of  
the Bioavailability after Single IV and Oral Administration  
to Male Sprague Dawley Rats.**

|                 |              |
|-----------------|--------------|
| Product Name:   | Fexinidazole |
| Study Number:   | 0327-2007    |
| Study Director: |              |
| Status:         | FINAL        |

## TABLE OF CONTENTS

|                                                    |    |
|----------------------------------------------------|----|
| 1. STUDY CONDUCT .....                             | 4  |
| 2. OBJECTIVE .....                                 | 4  |
| 3. ABBREVIATIONS .....                             | 4  |
| 4. METHODS .....                                   | 5  |
| 4.1. Study Design .....                            | 5  |
| 4.2. Sample Collection and Handling .....          | 5  |
| 4.3. Bioanalytical Method .....                    | 5  |
| 4.4. Pharmacokinetic Calculations .....            | 5  |
| 5. RESULTS .....                                   | 6  |
| 6. CONCLUSIONS .....                               | 6  |
| 7. CONTRIBUTORS .....                              | 7  |
| 8. ARCHIVING .....                                 | 7  |
| 9. REFERENCES .....                                | 7  |
| TABLES AND FIGURES .....                           | 8  |
| APPENDICES                                         |    |
| Appendix 1. Individual plasma concentrations ..... | 12 |
| Appendix 2. Bioanalytical method .....             | 13 |
| Appendix 3. Analytical performance .....           | 14 |

## 1. STUDY CONDUCT

The study, sponsored by Drugs for Neglected Diseases *initiative* (DNDi), was performed within Accelera, Nerviano Medical Sciences, Italy according the internal Standard Operating Procedures as a non-GLP regulated study.

## 2. OBJECTIVE

The objective of this study was to evaluate the pharmacokinetics and absolute bioavailability of Fexinidazole after single IV 5 mg/kg and oral 10 mg/kg doses of the compound to male Sprague Dawley rats.

## 3. ABBREVIATIONS

The following abbreviations are used in this document:

|                          |                                                                        |
|--------------------------|------------------------------------------------------------------------|
| AUC <sub>0-t(last)</sub> | Area under the plasma concentration vs. time curve up to finite time   |
| AUC <sub>0-∞</sub>       | Area under the plasma concentration vs. time curve up to infinite time |
| C <sub>0.033</sub>       | Concentration at 2 minutes after IV dosing, i.e. maximal concentration |
| C <sub>max</sub>         | Maximal plasma concentration                                           |
| CV                       | Coefficient of variation of the mean                                   |
| F                        | Absolute bioavailability                                               |
| h                        | Hours                                                                  |
| ID                       | Animal identification code                                             |
| IV                       | Intravenous                                                            |
| LC                       | Liquid chromatography                                                  |
| LLOQ                     | Lower limit of quantification                                          |
| MS                       | Mass-spectrometry                                                      |
| Norm                     | Normalized value                                                       |
| R <sup>2</sup>           | Correlation coefficient                                                |
| SD                       | Standard deviation of the mean                                         |
| SOP                      | Standard operating procedure                                           |
| STD                      | Standard sample                                                        |
| t <sub>1/2,z</sub>       | Terminal half-life                                                     |
| t <sub>max</sub>         | Time to peak plasma concentration                                      |
| t <sub>last</sub>        | Time of the last detectable concentration                              |
| ULOQ                     | Upper limit of quantification                                          |

## 4. METHODS

### 4.1. Study Design

The study was conducted according to the study protocol [1].

Fexinidazole was given as IV and oral administrations to male Sprague Dawley rats according to the following scheme

| Rat ID     | Route | Dose (mg/kg) | Formulation                               |
|------------|-------|--------------|-------------------------------------------|
| R4, R5, R6 | IV    | 5            | 70 % PEG 400 in 5 % dextrose solution     |
| R1, R2, R3 | Oral  | 10           | 5 % Tween 80 and 0.5% Methocel suspension |

IV dose was administered *via* the tail vein, the oral dose was administered by gastric gavage.

### 4.2. Sample Collection and Handling

About 3 days before dosing and while under anesthesia, animals were fitted with a cannula implanted in the superior vena cava *via* the jugular vein. On the day of dosing, approximately 0.3 mL of blood/sampling time were taken from the cannula using heparinized syringes, transferred immediately into tubes (pre-cooled in an ice/water bath) and centrifuged at 10000g for 3 minutes at 4°C. The separated plasma was split into two aliquots, then stored at -80°C until analysis. Blood was taken at 0.033 (2 minutes), 0.25, 0.5, 1, 2, 4 and 6 h after IV dosing, at 0.25, 0.5, 1, 2, 4, 6 and 8 h after oral dosing.

### 4.3. Bioanalytical Method

Plasma concentrations of Fexinidazole were determined by a LC-MS-MS method. The lower limit of the bioanalytical method was 5.12 ng/mL. Bioanalytical data were stored in Watson LIMS (v. 6.4.0.04, Thermo Fisher Scientific, Waltham, MA, USA). Details of the bioanalytical method were reported in Appendix 2 and the analytical performance was reported in Appendix 3.

### 4.4. Pharmacokinetic Calculations

Pharmacokinetic evaluation was carried out using non-compartmental approach with the aid of the Watson package (v. 6.4.0.04, Thermo Fisher Scientific, Waltham, MA, USA).

For the calculations, pre-dose concentrations were set equal to  $C_{0.033}$  and equal to zero after IV and oral administrations, respectively.

After IV dosing,  $C_{0.033}$ , maximal concentration, was read from raw plasma data; after oral dosing,  $C_{max}$  and  $t_{max}$  were read from raw data as the coordinates of the highest measured concentration. After both doses, the area under plasma concentration *vs.* time curve to finite time,  $AUC_{0-t(last)}$ , was determined by the linear trapezoidal rule up to the last detectable concentration. The half-life of the terminal phase,  $t_{1/2,z}$ , was determined by linear regression analysis of the natural-log concentration *vs.* time curve, where  $t_{1/2,z} = \ln(2)/\text{slope}$  of the regression line. The area under the concentration *vs.* time curve up to infinite time,  $AUC_{0-\infty}$ , was determined as

$$AUC_{0-\infty} = AUC_{0-t(\text{last})} + \frac{C_t(\text{last}) \cdot t_{1/2,z}}{\ln(2)}$$

After IV dosing, plasma clearance and volume of distribution at steady state were calculated as follows:

$$CL = \text{Dose}/AUC_{0-\infty}$$

$V_{ss} = CL \cdot MRT$ , where MRT is the mean residence time.

After both doses,  $C_{max}$  and AUC values were also normalized to a 1 mg/kg dose level.

Absolute bioavailability was calculated from the ratio of the average oral to IV dose-normalized  $AUC_{0-\infty}$  values.

Descriptive statistics (mean  $\pm$  SD, %CV) were reported for plasma concentrations and pharmacokinetic parameters sorted by route of dosing.

Plasma concentrations and pharmacokinetic parameters of Fexinidazole were reported to three significant figures.

## 5. RESULTS

Mean  $\pm$ SD systemic exposure parameters of Fexinidazole after IV and oral administrations of the compound are reported in Table 1. Individual and mean pharmacokinetic parameters of Fexinidazole after IV and oral administrations are reported in Tables 2 and 3, respectively. Individual and mean plasma concentrations of the compound are plotted in Figures 1 - 3 and reported in Table 1A1 of Appendix 1.

After IV administration, the rat ID R5 showed red urine half-an hour post dosing. This side effect disappeared at 1 h post dosing.

After IV administration, mean  $\pm$ SD  $C_{0.033}$  value of Fexinidazole was  $3660 \pm 217$  ng/mL. The plasma profile of the compound showed a poly-exponential decline (Figure 3) with mean  $\pm$ SD terminal half-life of  $1.71 \pm 0.3$  h. Mean  $\pm$ SD systemic clearance,  $76 \pm 2$  mL/min/kg, was higher than rat hepatic blood flow ( $69$  mL/min/kg, [3]), indicating high rate of elimination of the compound from the systemic circulation. Mean  $\pm$ SD volume of distribution at steady state,  $4690 \pm 410$  mL/kg, was about seven times higher than rat total body water (about  $700$  mL/kg [4]), suggesting extensive tissue distribution.

After oral administration, detectable concentrations of Fexinidazole were measured at the first sampling time (0.25 h). Mean  $\pm$ SD maximal plasma concentration of Fexinidazole was  $147 \pm 37$  ng/mL, achieved 2 h post dosing. The concentrations of the compound were detectable up to the end of the experiment (8 h). Mean  $\pm$ SD apparent terminal half-life of the compound was  $1.72 \pm 0.07$  h, comparable to that after IV dosing. Mean  $\pm$ SD  $AUC_{0-\infty}$  was  $662 \pm 106$  ng·h/mL. Absolute bioavailability was 30 %.

## 6. CONCLUSIONS

After both doses, low variability of the pharmacokinetic parameters of Fexinidazole was observed.

The results of the experiment indicated that the compound was endowed with a high clearance and volume of distribution. The terminal half-life was short and similar between the two routes of administration. The oral bioavailability of Fexinidazole was 30 %. Notwithstanding the high clearance, Fexinidazole showed a relatively high bioavailability. The reason of this discrepancy can be due to a saturation of hepatic first-pass metabolism or, in addition to the hepatic metabolism, other route(s) of elimination can play a significant role in the extent of plasma clearance of the compound.

After oral dosing, normalized to 1 mg/kg AUC<sub>0-∞</sub> (65 ng·h/mL) obtained in the present experiment was slightly higher than the corresponding one (45 ng·h/mL) obtained in a previous study in the rat (report no. 0259-2007-R, [2]).

## 7. CONTRIBUTORS

## 8. ARCHIVING

The protocol, raw data, pharmacokinetic analysis and final report were archived within Accelera Archive, Nerviano Medical Sciences, Italy, according the Unit Standard Operating Procedures.

## 9. REFERENCES

1. Fexinidazole: Evaluation of the Pharmacokinetics and of the Bioavailability after Single IV and Oral Administration to male Sprague Dawley rats. Nerviano Medical Sciences Study Protocol 0327-2007-P, September 25, 2007.
2. Fexinidazole: Evaluation of the Pharmacokinetics and of the Relative Bioavailability after Single Oral Administration of different Formulations of the Compound to male Sprague Dawley rats. Nerviano Medical Sciences Study Report 0259-2007-R, October 17, 2007.
3. Boxenbaum, H. Interspecies variation in liver weight, hepatic blood flow, and antipyrine intrinsic clearance: Extrapolation of data to benzodiazepines and phenytoin. J. Pharmacokin. Biopharm. 8: 165-176, 1980.
4. Spector, W. S. Handbook of Biological Data. Philadelphia, W.B. Saunders Co., 1956.

**TABLES AND FIGURES****Table 1.** Summary table of mean  $\pm$ SD systemic exposure values of Fexinidazole after single IV 5 mg/kg and oral 10 mg/kg doses of the compound in male Sprague Dawley rats.

| Route | C <sub>max</sub> (ng/mL) | AUC <sub>0-∞</sub> (ng·h/mL) | F (%) |
|-------|--------------------------|------------------------------|-------|
| IV    | 3660 $\pm$ 217           | 1200 $\pm$ 26.5              |       |
| Oral  | 147 $\pm$ 36.6           | 662 $\pm$ 106                | 29.7  |

**Table 2.** Individual and mean ( $\pm$ SD, %CV) pharmacokinetic parameters of Fexinidazole after single IV 5 mg/kg dose of the compound in male Sprague Dawley rats.

| Parameter (Units)                              | ID    |       |       | Mean | SD     | %CV |
|------------------------------------------------|-------|-------|-------|------|--------|-----|
|                                                | R4    | R5    | R6    |      |        |     |
| Weight (g)                                     | 265   | 268   | 271   | 268  | 3      | 1   |
| Actual Dose (mg/kg)                            | 5.6   | 5.5   | 5.4   | 5.5  | 0.0651 | 1   |
| C <sub>0.033</sub> (ng/mL)                     | 3690  | 3430  | 3860  | 3660 | 217    | 6   |
| t <sub>last</sub> (h)                          | 6     | 6     | 6     | 6    | 0      | 0   |
| AUC <sub>0-t(last)</sub> (ng·h/mL)             | 1190  | 1130  | 1160  | 1160 | 30     | 3   |
| Regression Range (h)                           | 2 - 6 | 2 - 6 | 2 - 6 | N/A  | N/A    | N/A |
| t <sub>1/2,z</sub> (h)                         | 1.51  | 1.6   | 2.03  | 1.71 | 0.278  | 16  |
| AUC <sub>0-∞</sub> (ng·h/mL)                   | 1210  | 1170  | 1220  | 1200 | 26.5   | 2   |
| CL (mL/min/kg)                                 | 76.4  | 78.2  | 74    | 76.2 | 2.11   | 3   |
| V <sub>ss</sub> (mL/kg)                        | 4250  | 4770  | 5060  | 4690 | 410    | 9   |
| C <sub>0.033</sub> , norm <sup>(1)</sup>       | 665   | 625   | 712   | 667  | 43.5   | 7   |
| AUC <sub>0-t(last)</sub> , norm <sup>(1)</sup> | 214   | 207   | 215   | 212  | 4.36   | 2   |
| AUC <sub>0-∞</sub> , norm <sup>(1)</sup>       | 218   | 213   | 225   | 219  | 6.03   | 3   |

N/A: not applicable

<sup>(1)</sup> C<sub>0.033</sub> (ng/mL) and AUC (ng·h/mL) values normalized to 1 mg/kg dose.

**Table 3.** Individual and mean ( $\pm$ SD, %CV) pharmacokinetic parameters of Fexinidazole after single oral 10 mg/kg dose of the compound in male Sprague Dawley rats.

| Parameter (Units)                                                                            | ID    |       |       | Mean | SD     | %CV |
|----------------------------------------------------------------------------------------------|-------|-------|-------|------|--------|-----|
|                                                                                              | R1    | R2    | R3    |      |        |     |
| Weight (g)                                                                                   | 273   | 276   | 277   | 275  | 2      | 1   |
| Actual Dose (mg/kg)                                                                          | 10.3  | 10.1  | 10.1  | 10.2 | 0.0794 | 1   |
| C <sub>max</sub> (ng/mL)                                                                     | 182   | 109   | 151   | 147  | 36.6   | 25  |
| t <sub>max</sub> (h)                                                                         | 2     | 2     | 2     | 2    | 0      | 0   |
| t <sub>last</sub> (h)                                                                        | 8     | 8     | 8     | 8    | 0      | 0   |
| AUC <sub>0-t(last)</sub> (ng·h/mL)                                                           | 710   | 524   | 659   | 631  | 96.1   | 15  |
| Regression Range (h)                                                                         | 2 - 8 | 2 - 8 | 2 - 8 | N/A  | N/A    | N/A |
| t <sub>1/2,z</sub> (h)                                                                       | 1.78  | 1.73  | 1.64  | 1.72 | 0.0709 | 4   |
| AUC <sub>0-∞</sub> (ng·h/mL)                                                                 | 754   | 546   | 687   | 662  | 106    | 16  |
| C <sub>max, norm</sub> <sup>(1)</sup>                                                        | 17.7  | 10.7  | 14.9  | 14.4 | 3.52   | 24  |
| AUC <sub>0-t(last), norm</sub> <sup>(1)</sup>                                                | 69.2  | 51.7  | 65.2  | 62   | 9.17   | 15  |
| AUC <sub>0-∞, norm</sub> <sup>(1)</sup>                                                      | 73.5  | 53.8  | 68    | 65.1 | 10.2   | 16  |
| F% AUC <sub>0-∞</sub>                                                                        |       |       |       | 29.7 |        |     |
| N/A: not applicable                                                                          |       |       |       |      |        |     |
| <sup>(1)</sup> C <sub>max</sub> (ng/mL) and AUC (ng·h/mL) values normalized to 1 mg/kg dose. |       |       |       |      |        |     |

**Figure 1.** Individual plasma concentrations (ng/mL) of Fexinidazole after single IV 5 mg/kg dose of the compound in male Sprague Dawley rats.

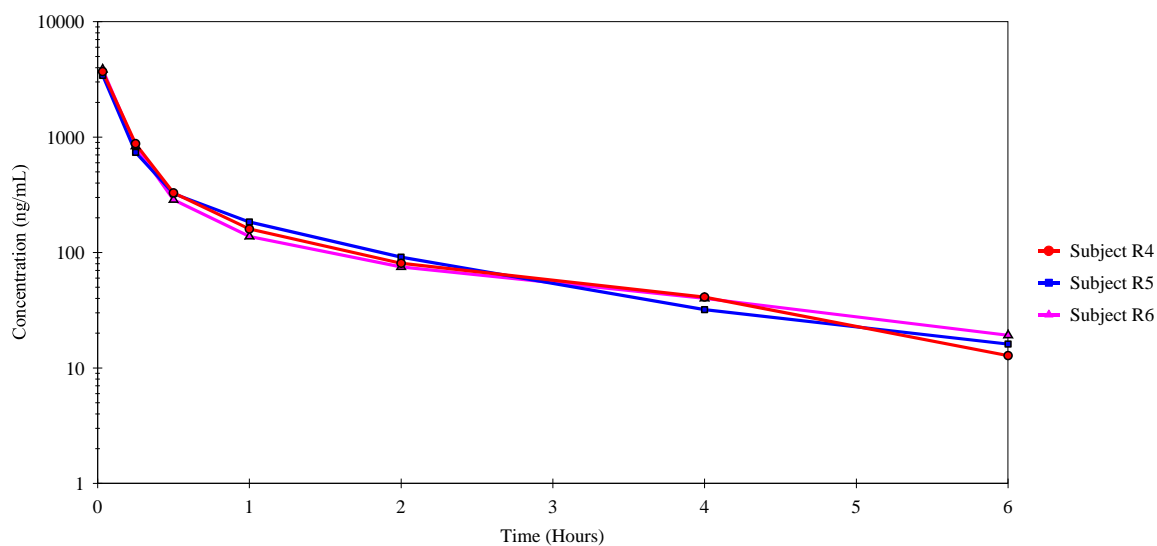

**Figure 2.** Individual plasma concentrations (ng/mL) of Fexinidazole after single oral 10 mg/kg dose of the compound in male Sprague Dawley rats.

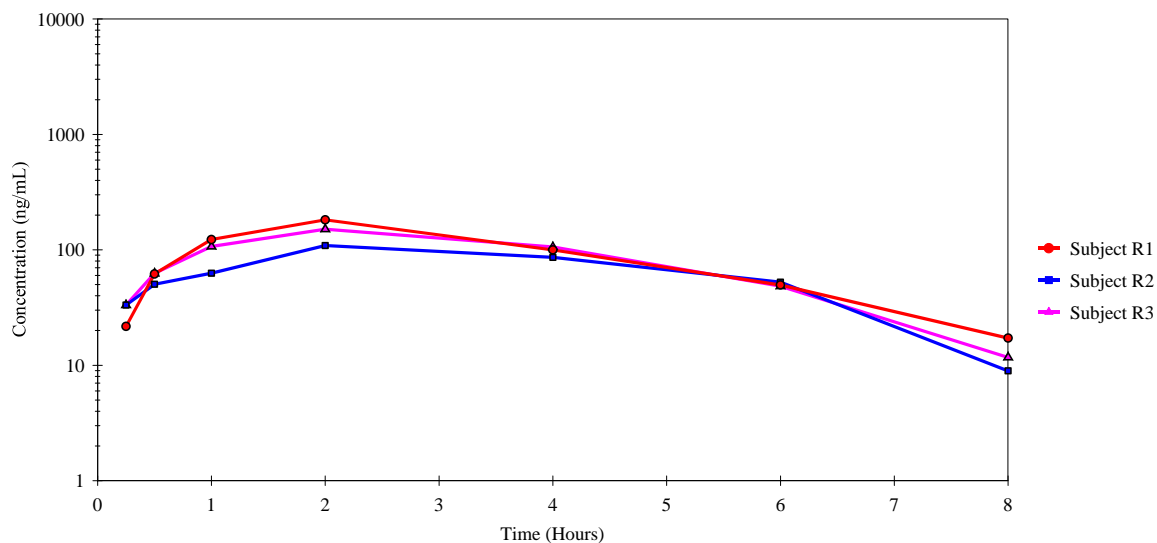

**Figure 3.** Mean ( $\pm$ SD) plasma concentrations (ng/mL) of Fexinidazole after single IV 5 mg/kg and oral 10 mg/kg doses of the compound in male Sprague Dawley rats.

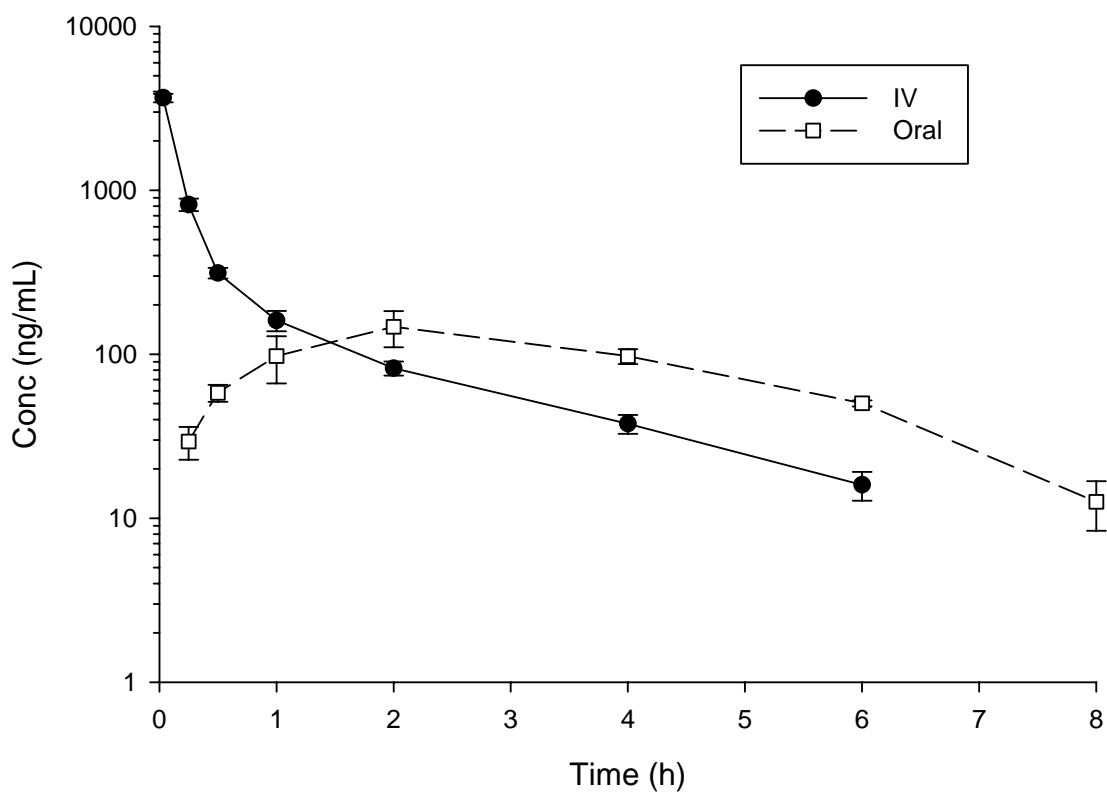

**APPENDICES****Appendix 1. Individual plasma concentrations****Table 1A1.** Individual and mean ( $\pm$ SD, %CV) plasma concentrations (ng/mL) of Fexinidazole after single IV 5 mg/kg and oral 10 mg/kg doses of the compound in male Sprague Dawley rats.

| IV       |       |       |       |      |      |     |
|----------|-------|-------|-------|------|------|-----|
| Time (h) | ID R4 | ID R5 | ID R6 | Mean | SD   | %CV |
| 0.033    | 3690  | 3430  | 3860  | 3660 | 217  | 6   |
| 0.25     | 877   | 738   | 836   | 817  | 71.4 | 9   |
| 0.5      | 329   | 324   | 287   | 313  | 22.9 | 7   |
| 1        | 160   | 184   | 138   | 161  | 23   | 14  |
| 2        | 80.7  | 91.2  | 75.1  | 82.3 | 8.17 | 10  |
| 4        | 41.1  | 32    | 40.1  | 37.7 | 4.99 | 13  |
| 6        | 12.8  | 16.1  | 19.2  | 16   | 3.2  | 20  |
| Oral     |       |       |       |      |      |     |
| Time (h) | ID R1 | ID R2 | ID R3 | Mean | SD   | %CV |
| 0.25     | 21.7  | 33.2  | 33.2  | 29.4 | 6.64 | 23  |
| 0.5      | 61.9  | 50.3  | 62.5  | 58.2 | 6.88 | 12  |
| 1        | 123   | 62.8  | 107   | 97.6 | 31.2 | 32  |
| 2        | 182   | 109   | 151   | 147  | 36.6 | 25  |
| 4        | 99.9  | 86.1  | 106   | 97.3 | 10.2 | 11  |
| 6        | 49.6  | 52.5  | 48.4  | 50.2 | 2.11 | 4   |
| 8        | 17.2  | 8.94  | 11.7  | 12.6 | 4.21 | 33  |

**Appendix 2. Bioanalytical method**

Fexinidazole (free base) was assayed using an LC-MS-MS method. Bioanalytical data are stored in Watson LIMS under Watson study 0327-2007 in the 348-Fexinidazole project.

**Plasma Sample Preparation**

Standards were prepared using rat plasma. Plasma proteins were precipitated by adding 200  $\mu$ L of methanol containing (2H3)-Fexinidazole as internal standard at a concentration of about 3 ng/mL to 25  $\mu$ L of plasma in a 96 well plate. After capping and vortex mixing, the plate was centrifuged for 10 minutes at 4000 rpm at 6°C. An aliquot of 100  $\mu$ L of supernatant was transferred in a 96 well plate and mixed with 100  $\mu$ L of 10 mM ammonium formate pH 3.5 injected onto the LC-MS-MS system.

**LC-MS/MS conditions**

HPLC system: Hewlett Packard 1100 series  
Mobile phase: Channel A: Ammonium Formate (10 mM pH 3.5)  
Channel B: Methanol

Elution mode: ISOCRATIC

Elution conditions

| Time (min) | 0.0 | 4.0 |  |  |  |  |
|------------|-----|-----|--|--|--|--|
| % A        | 40  | 40  |  |  |  |  |
| % B        | 60  | 60  |  |  |  |  |

Total Run Time: 4.0 minutes  
Flow rate: 1.0 mL/min  
Approximate retention time: Fexinidazole: about 2.3 min.  
(2H3)-Fexinidazole: about 2.28 min  
Column oven temp. 30 °C  
Analytical column: Chromolith RP-18 50 \* 4.6 mm (Merck)  
Autosampler type: Perkin Elmer PE 200  
Injection volume: 20  $\mu$ L  
Autosampler temperature: RT

MS instrument: Perkin Elmer SCIEX API 4000  
Ionisation: TURBO ION SPRAY in positive ion mode  
MRM transitions: Fexinidazole: m/z 280.2 m/z 140.2  
(2H3)-Fexinidazole m/z 283.2 m/z 143.2

Resolution Q1 Unit  
Q3 Unit  
LLOQ 5.12 ng/mL

ULOQ 955 ng/mL

Batch No. of standard N/A

Software used

Acquisition and processing: Analyst 1.4

Import data from Analyst file: 0327-2007-Run2.rdb, 0327-2007-Run3.rdb

Data file in Analyst: 0327-2007\Run2.wiff, 0327-2007\Run3.wiff

**Appendix 3. Analytical performance****Table 1A3.** Analytical Performance: Back-Calculated Concentrations (ng/mL) of Fexinidazole Calibration Standard in Rat Plasma for Study Protocol 0327-2007.

| Assay Date  | Analytical Run Number | STD.1<br>5.12<br>ng/mL | STD.2<br>50.0<br>ng/mL | STD.3<br>95.5<br>ng/mL | STD.4<br>500<br>ng/mL | STD.5<br>955<br>ng/mL | STD.6<br>5100<br>ng/mL |
|-------------|-----------------------|------------------------|------------------------|------------------------|-----------------------|-----------------------|------------------------|
| 22-Oct-2007 | 2                     | 4.81                   | 54.9                   | 97.8                   | 446                   | 936                   | *2860                  |
|             |                       | 5.34                   | 53.3                   | *112                   | 490                   | 933                   | *2860                  |
| 23-Oct-2007 | 3                     | 4.88                   | 55.5                   | 97.8                   | 489                   | 922                   | *2650                  |
|             |                       | 5.29                   | 50.7                   | *116                   | 477                   | 924                   | *2800                  |
|             |                       |                        |                        |                        |                       |                       |                        |
| Mean        |                       | 5.08                   | 53.6                   | 97.8                   | 476                   | 929                   |                        |
| SD          |                       | 0.274                  | 2.14                   | 0                      | 20.5                  | 6.8                   |                        |
| %CV         |                       | 5.4                    | 4                      | 0                      | 4.3                   | 0.7                   |                        |
| %Bias       |                       | -0.8                   | 7.2                    | 2.4                    | -4.8                  | -2.7                  |                        |
| n           |                       | 4                      | 4                      | 2                      | 4                     | 4                     |                        |

\* Reason Deactivated : Accuracy more than 15%. Since both high calibration standards have been excluded from regression analysis the ULOQ of the run has been lowered to STD.5 (i.e. 955 ng/mL).

**Table 2A3.** Calibration Curve Parameters for Fexinidazole Calibration Standards in Rat Plasma for Study Protocol 0327-2007.

| Run Date    | Curve Number | Slope     | Intercept | R <sup>2</sup> | LLOQ<br>ng/mL | ULOQ<br>ng/mL |
|-------------|--------------|-----------|-----------|----------------|---------------|---------------|
| 22-Oct-2007 | 2            | 0.141682  | 0.137233  | 0.9948         | 5.12          | 955           |
| 23-Oct-2007 | 3            | 0.152999  | 0.045528  | 0.9967         | 5.12          | 955           |
|             |              |           |           |                |               |               |
| Mean        |              | 0.147341  | 0.091381  | 0.9958         |               |               |
| SD          |              | 0.0080023 | 0.064845  | 0.0013         |               |               |
| %CV         |              | 5.4       | 71        | 0.1            |               |               |
| n           |              | 2         | 2         | 2              |               |               |

## **Amendment 1**

### **Fexinidazole: Evaluation of the Pharmacokinetics and of the Bioavailability after Single IV and Oral Administration to Male Sprague Dawley Rats.**

|                   |              |
|-------------------|--------------|
| Study Number      | 0327-2007    |
| Document Number   | 0327-2007-R  |
| Amendment Number: | 1            |
| Test Article:     | Fexinidazole |
| Study Director:   |              |

## **1. SPECIFIC CHANGE(S)**

### **1.1. Description(s) of Change(s)**

After specific request of the Sponsor, the additional stored plasma aliquots of the blood samples were used to evaluate the pharmacokinetics of the sulphone and sulfoxide metabolites of Fexinidazole.

The following Appendix 4 refers to the evaluation of the pharmacokinetics of the sulphone and sulfoxide metabolites of Fexinidazole and has to be intended as integration of the report 0327-2007-R. The report 0327-2007-R was not changed.

#### **1.1.1. Reason(s) for Change(s)**

Analysis was performed on the additional plasma aliquots to evaluate the pharmacokinetics of the sulphone and sulfoxide metabolites of Fexinidazole.

**Appendix 4. Evaluation of the pharmacokinetics of sulphone and sulfoxide metabolites of Fexinidazole****TABLE OF CONTENTS**

|                                         |   |
|-----------------------------------------|---|
| APPROVAL SIGNATURES.....                | 2 |
| 1. SPECIFIC CHANGE(S).....              | 3 |
| 1.1. Description(s) of Change(s) .....  | 3 |
| 1.1.1. Reason(s) for Change(s).....     | 3 |
| 2. ABBREVIATIONS .....                  | 5 |
| 3. METHODS .....                        | 5 |
| 3.1. Bioanalytical Method .....         | 5 |
| 3.2. Pharmacokinetic Calculations ..... | 5 |
| 4. RESULTS .....                        | 6 |
| 4.1. IV dosing .....                    | 6 |
| 4.2. Oral dosing .....                  | 6 |
| 5. CONCLUSIONS.....                     | 7 |
| 6. CONTRIBUTORS .....                   | 7 |
| 7. ARCHIVING .....                      | 7 |
| TABLES AND FIGURES .....                | 8 |

## 2. ABBREVIATIONS

The following abbreviations are used in this document:

|                          |                                                                      |
|--------------------------|----------------------------------------------------------------------|
| AUC <sub>0-t(last)</sub> | Area under the plasma concentration vs. time curve up to finite time |
| C <sub>max</sub>         | Maximal plasma concentration                                         |
| CV                       | Coefficient of variation of the mean                                 |
| h                        | Hours                                                                |
| ID                       | Animal identification code                                           |
| IV                       | Intravenous                                                          |
| LC                       | Liquid chromatography                                                |
| LLOQ                     | Lower limit of quantification                                        |
| MS                       | Mass-spectrometry                                                    |
| Norm                     | Normalized value                                                     |
| R <sup>2</sup>           | Correlation coefficient                                              |
| SD                       | Standard deviation of the mean                                       |
| STD                      | Standard sample                                                      |
| t <sub>max</sub>         | Time to peak plasma concentration                                    |
| t <sub>last</sub>        | Time of the last detectable concentration                            |
| ULOQ                     | Upper limit of quantification                                        |

## 3. METHODS

### 3.1. Bioanalytical Method

Plasma concentrations of the sulphone and sulfoxide Fexinidazole metabolites were determined by a LC-MS-MS method. The lower limit of the bioanalytical method was 5.00 ng/mL for both compounds. Bioanalytical data were stored in Watson LIMS (v. 6.4.0.04, Thermo Fisher Scientific, Waltham, MA, USA). Details of the bioanalytical method are reported in Table 1 and the analytical performances of calibration standards are reported in Tables 2-5.

### 3.2. Pharmacokinetic Calculations

Pharmacokinetic evaluations of the sulphone and sulfoxide metabolites were carried out using non-compartmental approach with the aid of the Watson package (v. 6.4.0.04, Thermo Fisher Scientific, Waltham, MA, USA).

After both doses, for the calculations, the pre-dose concentrations of the metabolites were set equal to zero.

C<sub>max</sub> and t<sub>max</sub> were read from raw data as the coordinates of the highest measured concentration. The area under plasma concentration vs. time curve up to finite time, AUC<sub>0-t(last)</sub>, was determined by the linear trapezoidal rule up to the last detectable concentration.

Metabolite to parent ratio was calculated based on C<sub>max</sub> and AUC<sub>0-t(last)</sub> values.

$C_{max}$  and  $AUC_{0-t(last)}$  values of both compounds were also normalized to a 1 mg/kg dose level.

Descriptive statistics (mean  $\pm$ SD, %CV) were reported for plasma concentrations and pharmacokinetic parameters of both compounds sorted by route of dosing.

Plasma concentrations and pharmacokinetic parameters of both compounds were reported to three significant figures.

## 4. RESULTS

Individual and mean plasma concentrations of the sulphone and sulfoxide metabolites of Fexinidazole are reported in Tables 6 and 7, respectively, whilst the corresponding parameters are reported in Tables 8 and 9. Individual plasma concentrations of the sulphone and sulfoxide metabolites are plotted in Figures 1 and 2, respectively, whilst the corresponding mean concentrations with those of the parent compound are reported in Figures 3 and 4.

### 4.1. IV dosing

After dosing, detectable concentrations of the sulphone metabolite were measured at the first sampling time (2 minutes post dosing). Mean maximal concentration of the compound was 2087 ng/mL, achieved, on average, 5 h post dosing. Detectable concentrations of the compound were measured up to the last sampling time (6 h post dosing). The mean  $AUC_{0-t(last)}$  was 9590 ng·h/mL. The metabolite to parent  $AUC_{0-t(last)}$  ratio was, on average, 8, indicating that Fexinidazole was extensively metabolised to its sulphone metabolite.

The plasma profile of the sulfoxide metabolite was different from that of the sulphone metabolite (Figure 3). Sulfoxide maximal concentration was, on average, 3067 ng/mL, and was achieved 1 h post dosing. Detectable concentrations of the compound were measured up to the last sampling time. The mean  $AUC_{0-t(last)}$  value was 9440 ng·h/mL. The metabolite to parent  $AUC_{0-t(last)}$  ratio was, on average, 8, indicating that Fexinidazole was extensively metabolised to its sulfoxide metabolite.

### 4.2. Oral dosing

After dosing, the maximal concentration of the sulphone metabolite was, on average, 2660 ng/mL, and was achieved 6 h post dosing. Detectable concentrations of the compound were measured up to the last sampling time (8 h post dosing). The  $AUC_{0-t(last)}$  value was, on average, 14300 ng·h/mL. The metabolite to parent  $AUC_{0-t(last)}$  ratio was, on average, 23.

The plasma profile of the sulfoxide metabolite was different from that of the sulphone metabolite but similar to that of the parent compound (Figure 4). The mean maximal concentration of the sulfoxide was 3520 ng/mL, achieved 2 h post dosing. Detectable concentrations of the compound were measured up to the last sampling time. The mean  $AUC_{0-t(last)}$  value was 16200 ng·h/mL. The metabolite to parent  $AUC_{0-t(last)}$  ratio was, on average, 26.

## **5. CONCLUSIONS**

After both doses, the coefficient of variation of the mean systemic exposure parameters of both metabolites was low, being at most 25 %.

After both IV and oral dosing, Fexinidazole was extensively metabolized to the sulphone and sulfoxide derivatives. For both metabolites, the metabolite to parent ratio was higher after oral than after IV dosing, suggesting extensive first pass metabolism of Fexinidazole after oral dosing.

## **6. CONTRIBUTORS**

## **7. ARCHIVING**

The protocol, raw data, pharmacokinetic analysis and final report were archived within Accelera Archive, Nerviano Medical Sciences, Italy, according the Unit Standard Operating Procedures.

**TABLES AND FIGURES****Table 1.** Bio-analytical method.

|                                |    |                                                                                                                                                                                                                                                                                                                                                                                                                                                                                                                                                                  |     |       |      |       |      |      |
|--------------------------------|----|------------------------------------------------------------------------------------------------------------------------------------------------------------------------------------------------------------------------------------------------------------------------------------------------------------------------------------------------------------------------------------------------------------------------------------------------------------------------------------------------------------------------------------------------------------------|-----|-------|------|-------|------|------|
| Plasma Sample Preparation:     |    | Standards were prepared using rat plasma. Plasma proteins were precipitated by adding 200 µL of methanol containing 100 ng/ml of [ <sup>2</sup> H <sub>3</sub> ] Fexinidazole as Stable Labeled Internal Standard (SLIS) to 25 µL of plasma in a 96 well plate. After capping and vortex mixing, the plate was centrifuged for 10 minutes at 4000 rpm at 6°C. Aliquots of 100 µL of supernatant were transferred in a clean 96 well plate and mixed with 100 µL of 10 mM ammonium formate pH 3.5. Aliquots of 10 µL were then injected onto the LC-MS-MS system. |     |       |      |       |      |      |
| LC-MS/MS conditions:           |    | Hewlett Packard 1100 series                                                                                                                                                                                                                                                                                                                                                                                                                                                                                                                                      |     |       |      |       |      |      |
| HPLC system:                   |    | Channel A: Ammonium Formate (10 mM pH 3.5)                                                                                                                                                                                                                                                                                                                                                                                                                                                                                                                       |     |       |      |       |      |      |
| Mobile phase                   |    | Channel B: Methanol                                                                                                                                                                                                                                                                                                                                                                                                                                                                                                                                              |     |       |      |       |      |      |
| Elution mode                   |    | Gradient                                                                                                                                                                                                                                                                                                                                                                                                                                                                                                                                                         |     |       |      |       |      |      |
| Elution conditions             |    | Time (min)                                                                                                                                                                                                                                                                                                                                                                                                                                                                                                                                                       | 0.0 | 2.10  | 2.30 | 5.00  | 5.20 | 6.00 |
|                                |    | % A                                                                                                                                                                                                                                                                                                                                                                                                                                                                                                                                                              | 65  | 65    | 40   | 40    | 65   | 65   |
|                                |    | % B                                                                                                                                                                                                                                                                                                                                                                                                                                                                                                                                                              | 35  | 35    | 60   | 60    | 35   | 35   |
| Total Run Time:                |    | 6.0 minutes                                                                                                                                                                                                                                                                                                                                                                                                                                                                                                                                                      |     |       |      |       |      |      |
| Flow rate:                     |    | 1.0 mL/min                                                                                                                                                                                                                                                                                                                                                                                                                                                                                                                                                       |     |       |      |       |      |      |
| Approximate retention times:   |    | sulphone: about 2.0 min                                                                                                                                                                                                                                                                                                                                                                                                                                                                                                                                          |     |       |      |       |      |      |
|                                |    | sulphoxide: about 1.8 min                                                                                                                                                                                                                                                                                                                                                                                                                                                                                                                                        |     |       |      |       |      |      |
|                                |    | SLIS: about 4.4 min                                                                                                                                                                                                                                                                                                                                                                                                                                                                                                                                              |     |       |      |       |      |      |
| Column oven temp.              |    | 40 °C                                                                                                                                                                                                                                                                                                                                                                                                                                                                                                                                                            |     |       |      |       |      |      |
| Analytical column:             |    | Chromolith RP-18 50 * 4.6 mm (Merck)                                                                                                                                                                                                                                                                                                                                                                                                                                                                                                                             |     |       |      |       |      |      |
| Autosampler type:              |    | CTC PAL                                                                                                                                                                                                                                                                                                                                                                                                                                                                                                                                                          |     |       |      |       |      |      |
| Injection volume:              |    | 10 µL                                                                                                                                                                                                                                                                                                                                                                                                                                                                                                                                                            |     |       |      |       |      |      |
| Autosampler temperature:       |    | 10°C                                                                                                                                                                                                                                                                                                                                                                                                                                                                                                                                                             |     |       |      |       |      |      |
| MS instrument:                 |    | Perkin Elmer SCIEX API 4000                                                                                                                                                                                                                                                                                                                                                                                                                                                                                                                                      |     |       |      |       |      |      |
| Ionisation:                    |    | TURBO ION SPRAY in positive ion mode                                                                                                                                                                                                                                                                                                                                                                                                                                                                                                                             |     |       |      |       |      |      |
| MRM transitions:               |    | sulphone                                                                                                                                                                                                                                                                                                                                                                                                                                                                                                                                                         | m/z | 312.2 | m/z  | 140.2 |      |      |
|                                |    | sulphoxide                                                                                                                                                                                                                                                                                                                                                                                                                                                                                                                                                       | m/z | 296.2 | m/z  | 140.2 |      |      |
|                                |    | SLIS                                                                                                                                                                                                                                                                                                                                                                                                                                                                                                                                                             | m/z | 283.2 | m/z  | 143.2 |      |      |
| Resolution                     | Q1 | Unit                                                                                                                                                                                                                                                                                                                                                                                                                                                                                                                                                             |     |       |      |       |      |      |
|                                | Q3 | Unit                                                                                                                                                                                                                                                                                                                                                                                                                                                                                                                                                             |     |       |      |       |      |      |
| LLOQ                           |    | 5.00 ng/mL                                                                                                                                                                                                                                                                                                                                                                                                                                                                                                                                                       |     |       |      |       |      |      |
| ULOQ                           |    | 5000 ng/mL                                                                                                                                                                                                                                                                                                                                                                                                                                                                                                                                                       |     |       |      |       |      |      |
| Batch No. of standard          |    | N/A                                                                                                                                                                                                                                                                                                                                                                                                                                                                                                                                                              |     |       |      |       |      |      |
| Software used:                 |    |                                                                                                                                                                                                                                                                                                                                                                                                                                                                                                                                                                  |     |       |      |       |      |      |
| Acquisition and processing:    |    | Analyst v. 1.4.1                                                                                                                                                                                                                                                                                                                                                                                                                                                                                                                                                 |     |       |      |       |      |      |
| LIMS:                          |    | Watson v. 6.4.0.04                                                                                                                                                                                                                                                                                                                                                                                                                                                                                                                                               |     |       |      |       |      |      |
| Import data from Analyst file: |    | 0327-2007-Run4.rdb                                                                                                                                                                                                                                                                                                                                                                                                                                                                                                                                               |     |       |      |       |      |      |
| Data file in Analyst:          |    | 0327-2007\Run4.wiff                                                                                                                                                                                                                                                                                                                                                                                                                                                                                                                                              |     |       |      |       |      |      |

# CONFIDENTIAL

Fexinidazole  
Report Amendment for Study 0327-2007

0327-2007-RA1

**Table 2.** Analytical Performance: Back-Calculated Concentrations (ng/mL) of Fexinidazole sulphone Calibration Standard in Rat Plasma for Study Protocol 0327-2007.

| Assay Date                                     | Analytical Run Number | STD.1<br>5.00<br>ng/mL | STD.2<br>10.0<br>ng/mL | STD.3<br>50.0<br>ng/mL | STD.4<br>100<br>ng/mL | STD.5<br>500<br>ng/mL | STD.6<br>1000<br>ng/mL | STD.7<br>4000<br>ng/mL | STD.8<br>5000<br>ng/mL |
|------------------------------------------------|-----------------------|------------------------|------------------------|------------------------|-----------------------|-----------------------|------------------------|------------------------|------------------------|
| 19-Dec-2007                                    | 4                     | 5.17                   | 9.63                   | 48.4                   | 105                   | 443                   | 855                    | 4420                   | 5680                   |
|                                                |                       | 4.92                   | *91.5                  | 50.4                   | 101                   | 517                   | 965                    | *5170                  | *6280                  |
|                                                |                       |                        |                        |                        |                       |                       |                        |                        |                        |
| Mean                                           |                       | 5.05                   | 9.63                   | 49.4                   | 103                   | 480                   | 910                    | 4420                   | 5680                   |
| SD                                             |                       | 0.177                  |                        | 1.41                   | 2.83                  | 52.3                  | 77.8                   |                        |                        |
| %CV                                            |                       | 3.5                    |                        | 2.9                    | 2.7                   | 10.9                  | 8.5                    |                        |                        |
| %Bias                                          |                       | 1                      | -3.7                   | -1.2                   | 3                     | -4                    | -9                     | 10.5                   | 13.6                   |
| n                                              |                       | 2                      | 1                      | 2                      | 2                     | 2                     | 2                      | 1                      | 1                      |
| * Reason Deactivated : Accuracy more than 15%. |                       |                        |                        |                        |                       |                       |                        |                        |                        |

**Table 3.** Calibration Curve Parameters for Fexinidazole sulphone Calibration Standards in Rat Plasma for Study Protocol 0327-2007.

| Run Date                                                        | Curve Number | Slope     | Intercept  | R <sup>2</sup> | LLOQ<br>ng/mL | ULOQ<br>ng/mL | Regression<br>Footnote(s) |
|-----------------------------------------------------------------|--------------|-----------|------------|----------------|---------------|---------------|---------------------------|
| 19-Dec-2007                                                     | 4            | 0.0024137 | -0.0025907 | 0.9925         | 5             | 5000          | 1                         |
|                                                                 |              |           |            |                |               |               |                           |
| Mean                                                            |              | 0.0024137 | -0.0025907 | 0.9925         |               |               |                           |
| n                                                               |              | 1         | 1          | 1              |               |               |                           |
| Regression Footnote(s):<br>1) Resp. = Slope * Conc. + Intercept |              |           |            |                |               |               |                           |

# CONFIDENTIAL

Fexinidazole  
Report Amendment for Study 0327-2007

0327-2007-RA1

**Table 4.** Analytical Performance: Back-Calculated Concentrations (ng/mL) of Fexinidazole sulphoxide Calibration Standard in Rat Plasma for Study Protocol 0327-2007.

| Assay Date                                     | Analytical Run Number | STD.1<br>5.00<br>ng/mL | STD.2<br>10.0<br>ng/mL | STD.3<br>50.0<br>ng/mL | STD.4<br>100<br>ng/mL | STD.5<br>500<br>ng/mL | STD.6<br>1000<br>ng/mL | STD.7<br>4000<br>ng/mL | STD.8<br>5000<br>ng/mL |
|------------------------------------------------|-----------------------|------------------------|------------------------|------------------------|-----------------------|-----------------------|------------------------|------------------------|------------------------|
| 19-Dec-2007                                    | 4                     | 5.02                   | 8.62                   | 45.1                   | 105                   | 448                   | 885                    | 4310                   | 5610                   |
|                                                |                       | 5.33                   | *88.3                  | 52.1                   | 104                   | 531                   | 997                    | *5110                  | *6180                  |
|                                                |                       |                        |                        |                        |                       |                       |                        |                        |                        |
| Mean                                           |                       | 5.18                   | 8.62                   | 48.6                   | 105                   | 490                   | 941                    | 4310                   | 5610                   |
| SD                                             |                       | 0.219                  |                        | 4.95                   | 0.707                 | 58.7                  | 79.2                   |                        |                        |
| %CV                                            |                       | 4.2                    |                        | 10.2                   | 0.7                   | 12                    | 8.4                    |                        |                        |
| %Bias                                          |                       | 3.6                    | -13.8                  | -2.8                   | 5                     | -2                    | -5.9                   | 7.8                    | 12.2                   |
| n                                              |                       | 2                      | 1                      | 2                      | 2                     | 2                     | 2                      | 1                      | 1                      |
| * Reason Deactivated : Accuracy more than 15%. |                       |                        |                        |                        |                       |                       |                        |                        |                        |

**Table 5.** Calibration Curve Parameters for Fexinidazole sulphoxide Calibration Standards in Rat Plasma for Study Protocol 0327-2007.

| Run Date                                                        | Curve Number | Slope     | Intercept | R <sup>2</sup> | LLOQ<br>ng/mL | ULOQ<br>ng/mL | Regression Footnote(s) |
|-----------------------------------------------------------------|--------------|-----------|-----------|----------------|---------------|---------------|------------------------|
| 19-Dec-2007                                                     | 4            | 0.0015765 | -0.00174  | 0.9909         | 5             | 5000          | 1                      |
|                                                                 |              |           |           |                |               |               |                        |
| Mean                                                            |              | 0.0015765 | -0.00174  | 0.9909         |               |               |                        |
| n                                                               |              | 1         | 1         | 1              |               |               |                        |
| Regression Footnote(s):<br>1) Resp. = Slope * Conc. + Intercept |              |           |           |                |               |               |                        |

**Table 6.** Individual and mean ( $\pm$ SD, %CV) plasma concentrations (ng/mL) of sulphone and sulphoxide metabolites of Fexinidazole after single IV 5 mg/kg dose of Fexinidazole in male Sprague Dawley rats.

| Sulphone   |       |       |       |      |      |     |
|------------|-------|-------|-------|------|------|-----|
| Time (h)   | ID R4 | ID R5 | ID R6 | Mean | SD   | %CV |
| 0.033      | 16.2  | 12.8  | 16.4  | 15.1 | 2.02 | 13  |
| 0.25       | 325   | 251   | 272   | 283  | 38.1 | 14  |
| 0.5        | 630   | 453   | 574   | 552  | 90.5 | 16  |
| 1          | 1300  | 851   | 1040  | 1060 | 225  | 21  |
| 2          | 2120  | 1210  | 1600  | 1640 | 457  | 28  |
| 4          | 2490  | 1360  | 2180  | 2010 | 584  | 29  |
| 6          | 2370  | 1480  | 2290  | 2050 | 492  | 24  |
| Sulphoxide |       |       |       |      |      |     |
| Time (h)   | ID R4 | ID R5 | ID R6 | Mean | SD   | %CV |
| 0.033      | 444   | 498   | 431   | 458  | 35.5 | 8   |
| 0.25       | 2460  | 2460  | 2050  | 2320 | 237  | 10  |
| 0.5        | 2780  | 2620  | 2650  | 2680 | 85   | 3   |
| 1          | 3380  | 3060  | 2760  | 3070 | 310  | 10  |
| 2          | 2320  | 1980  | 2130  | 2140 | 170  | 8   |
| 4          | 924   | 783   | 1120  | 942  | 169  | 18  |
| 6          | 312   | 414   | 579   | 435  | 135  | 31  |

**Table 7.** Individual and mean ( $\pm$ SD, %CV) plasma concentrations (ng/mL) of sulphone and sulphoxide metabolites of Fexinidazole after single oral 10 mg/kg dose of Fexinidazole in male Sprague Dawley rats.

| Sulphone   |       |       |       |      |      |     |
|------------|-------|-------|-------|------|------|-----|
| Time (h)   | ID R1 | ID R2 | ID R3 | Mean | SD   | %CV |
| 0.25       | 38.1  | 54.9  | 58.8  | 50.6 | 11   | 22  |
| 0.5        | 156   | 162   | 149   | 156  | 6.51 | 4   |
| 1          | 537   | 334   | 496   | 456  | 107  | 24  |
| 2          | 1340  | 783   | 1260  | 1130 | 301  | 27  |
| 4          | 2750  | 1710  | 2420  | 2290 | 531  | 23  |
| 6          | 2890  | 2040  | 3050  | 2660 | 543  | 20  |
| 8          | 2740  | 1630  | 2600  | 2320 | 605  | 26  |
| Sulphoxide |       |       |       |      |      |     |
| Time (h)   | ID R1 | ID R2 | ID R3 | Mean | SD   | %CV |
| 0.25       | 615   | 843   | 944   | 801  | 169  | 21  |
| 0.5        | 1730  | 1490  | 1370  | 1530 | 183  | 12  |
| 1          | 3330  | 1780  | 2710  | 2610 | 780  | 30  |
| 2          | 4360  | 2650  | 3550  | 3520 | 855  | 24  |
| 4          | 2930  | 2440  | 2530  | 2630 | 261  | 10  |
| 6          | 1310  | 1260  | 1370  | 1310 | 55.1 | 4   |
| 8          | 477   | 241   | 331   | 350  | 119  | 34  |

# CONFIDENTIAL

Fexinidazole  
Report Amendment for Study 0327-2007

0327-2007-RA1

**Table 8.** Individual and mean ( $\pm$ SD, %CV) pharmacokinetic parameters of sulphone and sulphoxide metabolites of Fexinidazole after single IV 5 mg/kg dose of Fexinidazole in male Sprague Dawley rats.

| Sulphone                                                                                                                                                                                                                                                                              |        |       |       |       |       |     |
|---------------------------------------------------------------------------------------------------------------------------------------------------------------------------------------------------------------------------------------------------------------------------------------|--------|-------|-------|-------|-------|-----|
| Parameter (Units)                                                                                                                                                                                                                                                                     | Rat ID |       |       | Mean  | SD    | %CV |
|                                                                                                                                                                                                                                                                                       | ID R4  | ID R5 | ID R6 |       |       |     |
| C <sub>max</sub> (ng/mL)                                                                                                                                                                                                                                                              | 2490   | 1480  | 2290  | 2087  | 535   | 26  |
| t <sub>max</sub> (h)                                                                                                                                                                                                                                                                  | 4      | 6     | 6     | 5.33  | 1.15  | 22  |
| t <sub>last</sub> (h)                                                                                                                                                                                                                                                                 | 6      | 6     | 6     | 6     | 0     | 0   |
| AUC <sub>0-t(last)</sub> (ng·h/mL)                                                                                                                                                                                                                                                    | 11800  | 6880  | 10100 | 9590  | 2500  | 26  |
| C <sub>max, norm</sub> <sup>(1)</sup>                                                                                                                                                                                                                                                 | 449    | 270   | 423   | 381   | 96.7  | 25  |
| AUC <sub>0-t(last), norm</sub> <sup>(1)</sup>                                                                                                                                                                                                                                         | 2130   | 1250  | 1870  | 1750  | 452   | 26  |
| <sup>(2)</sup>                                                                                                                                                                                                                                                                        | 0.675  | 0.431 | 0.593 | 0.567 | 0.124 | 22  |
| <sup>(3)</sup>                                                                                                                                                                                                                                                                        | 9.92   | 6.09  | 8.71  | 8.24  | 1.96  | 24  |
| Sulphoxide                                                                                                                                                                                                                                                                            |        |       |       |       |       |     |
| Parameter (Units)                                                                                                                                                                                                                                                                     | Rat ID |       |       | Mean  | SD    | %CV |
|                                                                                                                                                                                                                                                                                       | ID R4  | ID R5 | ID R6 |       |       |     |
| C <sub>max</sub> (ng/mL)                                                                                                                                                                                                                                                              | 3380   | 3060  | 2760  | 3067  | 310   | 10  |
| t <sub>max</sub> (h)                                                                                                                                                                                                                                                                  | 1      | 1     | 1     | 1     | 0     | 0   |
| t <sub>last</sub> (h)                                                                                                                                                                                                                                                                 | 6      | 6     | 6     | 6     | 0     | 0   |
| AUC <sub>0-t(last)</sub> (ng·h/mL)                                                                                                                                                                                                                                                    | 9850   | 8860  | 9610  | 9440  | 516   | 6   |
| C <sub>max, norm</sub> <sup>(1)</sup>                                                                                                                                                                                                                                                 | 609    | 557   | 509   | 558   | 50    | 9   |
| AUC <sub>0-t(last), norm</sub> <sup>(1)</sup>                                                                                                                                                                                                                                         | 1770   | 1610  | 1770  | 1720  | 92.4  | 5   |
| <sup>(2)</sup>                                                                                                                                                                                                                                                                        | 0.916  | 0.892 | 0.715 | 0.841 | 0.11  | 13  |
| <sup>(3)</sup>                                                                                                                                                                                                                                                                        | 8.28   | 7.84  | 8.28  | 8.13  | 0.254 | 3   |
| <sup>(1)</sup> C <sub>max</sub> (ng/mL) and AUC <sub>0-t(last)</sub> (ng·h/mL) values normalized to 1 mg/kg dose.<br><sup>(2)</sup> C <sub>max, metabolite</sub> / C <sub>max, parent</sub><br><sup>(3)</sup> AUC <sub>0-t(last), metabolite</sub> / AUC <sub>0-t(last), parent</sub> |        |       |       |       |       |     |

# CONFIDENTIAL

Fexinidazole  
Report Amendment for Study 0327-2007

0327-2007-RA1

**Table 9.** Individual and mean ( $\pm$ SD, %CV) pharmacokinetic parameters of sulphone and sulphoxide metabolites of Fexinidazole after single oral 10 mg/kg dose of Fexinidazole in male Sprague Dawley rats.

| Sulphone                                                                                                                                                                                                                                                                              |        |       |       |       |       |     |
|---------------------------------------------------------------------------------------------------------------------------------------------------------------------------------------------------------------------------------------------------------------------------------------|--------|-------|-------|-------|-------|-----|
| Parameter (Units)                                                                                                                                                                                                                                                                     | Rat ID |       |       | Mean  | SD    | %CV |
|                                                                                                                                                                                                                                                                                       | ID R1  | ID R2 | ID R3 |       |       |     |
| C <sub>max</sub> (ng/mL)                                                                                                                                                                                                                                                              | 2890   | 2040  | 3050  | 2660  | 543   | 20  |
| t <sub>max</sub> (h)                                                                                                                                                                                                                                                                  | 6      | 6     | 6     | 6     | 0     | 0   |
| t <sub>last</sub> (h)                                                                                                                                                                                                                                                                 | 8      | 8     | 8     | 8     | 0     | 0   |
| AUC <sub>0-t(last)</sub> (ng·h/mL)                                                                                                                                                                                                                                                    | 16500  | 10600 | 15900 | 14300 | 3250  | 23  |
| C <sub>max, norm</sub> <sup>(1)</sup>                                                                                                                                                                                                                                                 | 282    | 201   | 302   | 262   | 53.5  | 20  |
| AUC <sub>0-t(last), norm</sub> <sup>(1)</sup>                                                                                                                                                                                                                                         | 1610   | 1050  | 1570  | 1410  | 312   | 22  |
| <sup>(2)</sup>                                                                                                                                                                                                                                                                        | 15.9   | 18.7  | 20.2  | 18.3  | 2.19  | 12  |
| <sup>(3)</sup>                                                                                                                                                                                                                                                                        | 23.2   | 20.2  | 24.1  | 22.5  | 2.04  | 9   |
| Sulphoxide                                                                                                                                                                                                                                                                            |        |       |       |       |       |     |
| Parameter (Units)                                                                                                                                                                                                                                                                     | Rat ID |       |       | Mean  | SD    | %CV |
|                                                                                                                                                                                                                                                                                       | ID R1  | ID R2 | ID R3 |       |       |     |
| C <sub>max</sub> (ng/mL)                                                                                                                                                                                                                                                              | 4360   | 2650  | 3550  | 3520  | 855   | 24  |
| t <sub>max</sub> (h)                                                                                                                                                                                                                                                                  | 2      | 2     | 2     | 2     | 0     | 0   |
| t <sub>last</sub> (h)                                                                                                                                                                                                                                                                 | 8      | 8     | 8     | 8     | 0     | 0   |
| AUC <sub>0-t(last)</sub> (ng·h/mL)                                                                                                                                                                                                                                                    | 18800  | 13700 | 16200 | 16200 | 2550  | 16  |
| C <sub>max, norm</sub> <sup>(1)</sup>                                                                                                                                                                                                                                                 | 425    | 261   | 351   | 346   | 82.1  | 24  |
| AUC <sub>0-t(last), norm</sub> <sup>(1)</sup>                                                                                                                                                                                                                                         | 1830   | 1350  | 1610  | 1600  | 240   | 15  |
| <sup>(2)</sup>                                                                                                                                                                                                                                                                        | 24     | 24.3  | 23.5  | 23.9  | 0.402 | 2   |
| <sup>(3)</sup>                                                                                                                                                                                                                                                                        | 26.5   | 26.1  | 24.6  | 25.7  | 1.01  | 4   |
| <sup>(1)</sup> C <sub>max</sub> (ng/mL) and AUC <sub>0-t(last)</sub> (ng·h/mL) values normalized to 1 mg/kg dose.<br><sup>(2)</sup> C <sub>max, metabolite</sub> / C <sub>max, parent</sub><br><sup>(3)</sup> AUC <sub>0-t(last), metabolite</sub> / AUC <sub>0-t(last), parent</sub> |        |       |       |       |       |     |

**Figure 1.** Individual plasma concentrations (ng/mL) of sulphone (upper panel) and sulfoxide (lower panel) metabolites after single IV 5 mg/kg dose of Fexinidazole in male Sprague Dawley rats.

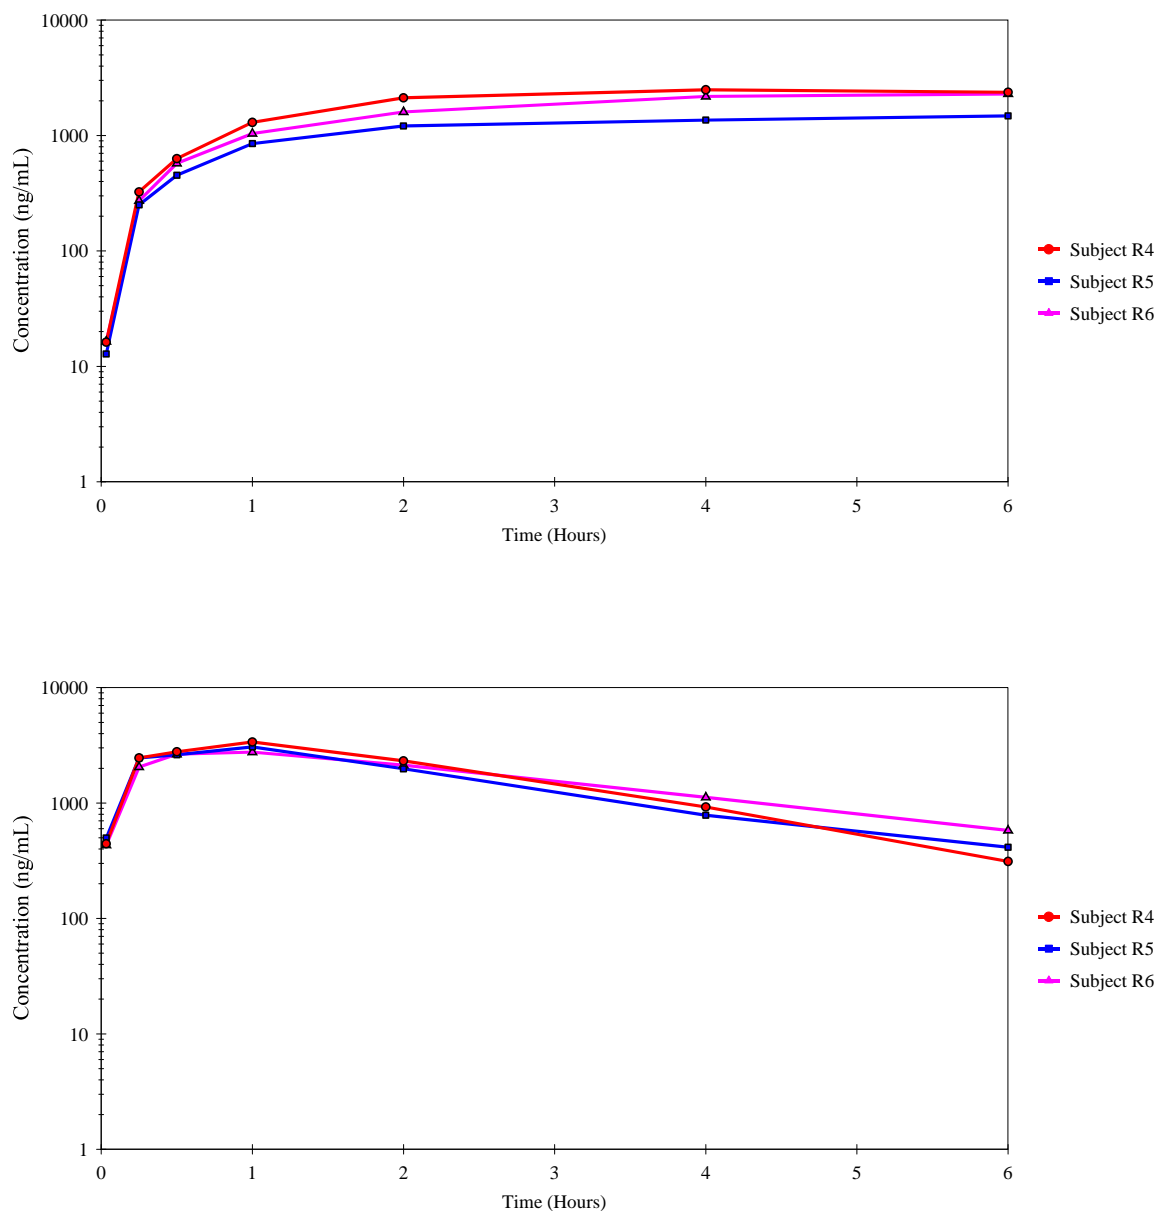

**Figure 2.** Individual plasma concentrations (ng/mL) of sulphone (upper panel) and sulfoxide (lower panel) metabolites after single oral 10 mg/kg dose of Fexinidazole in male Sprague Dawley rats.

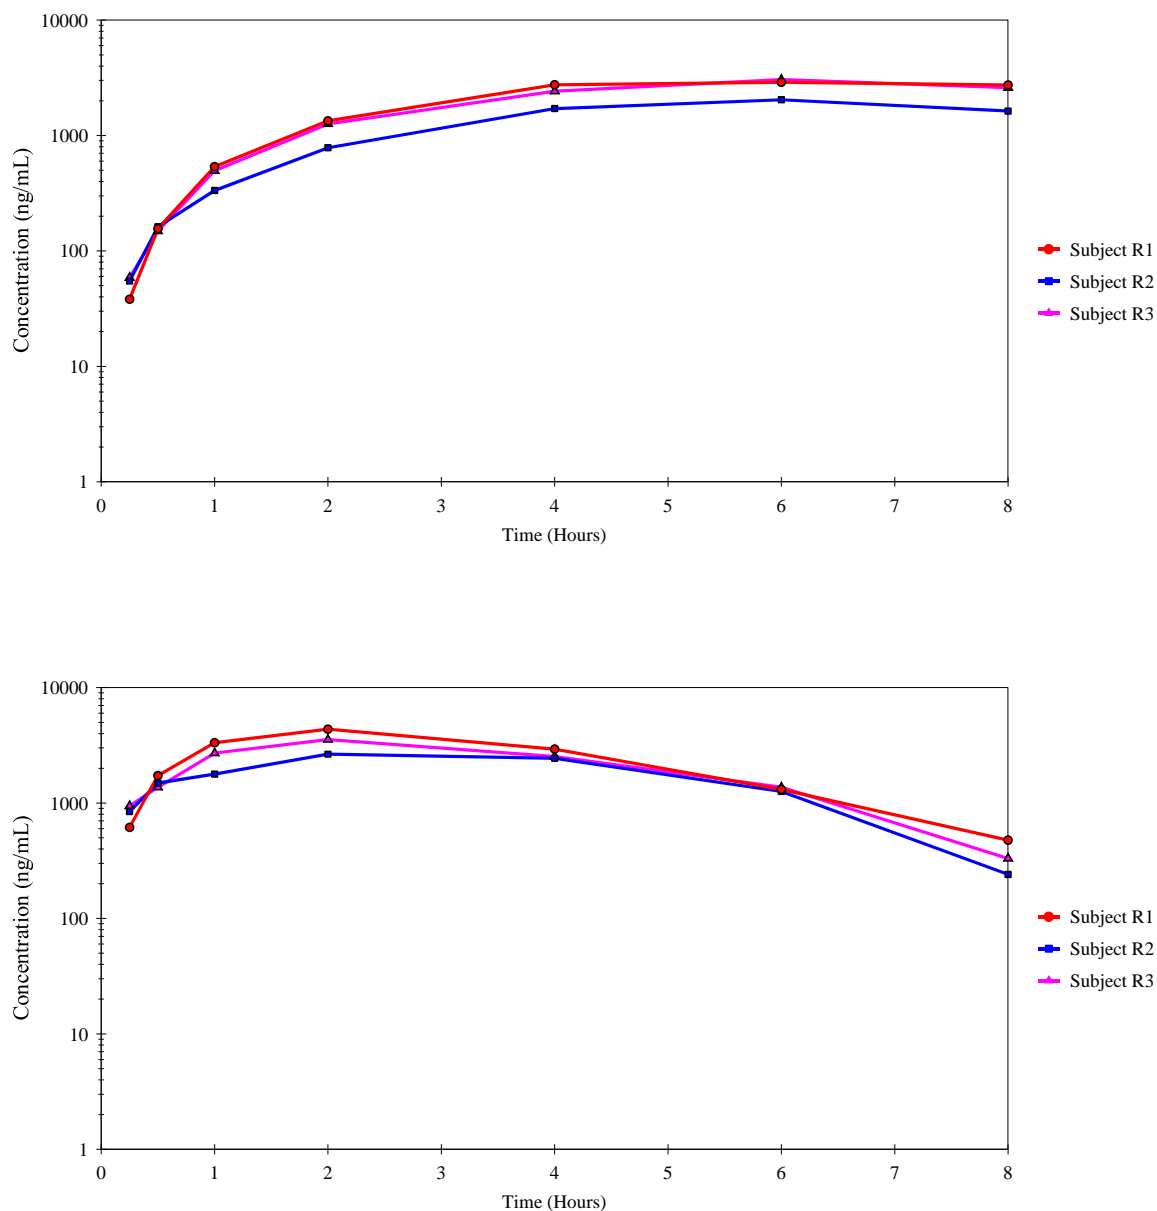

**Figure 3.** Mean ( $\pm$ SD) plasma concentrations (ng/mL) of Fexinidazole and its sulphone and sulfoxide metabolites after single IV 5 mg/kg of Fexinidazole in male Sprague Dawley rats.

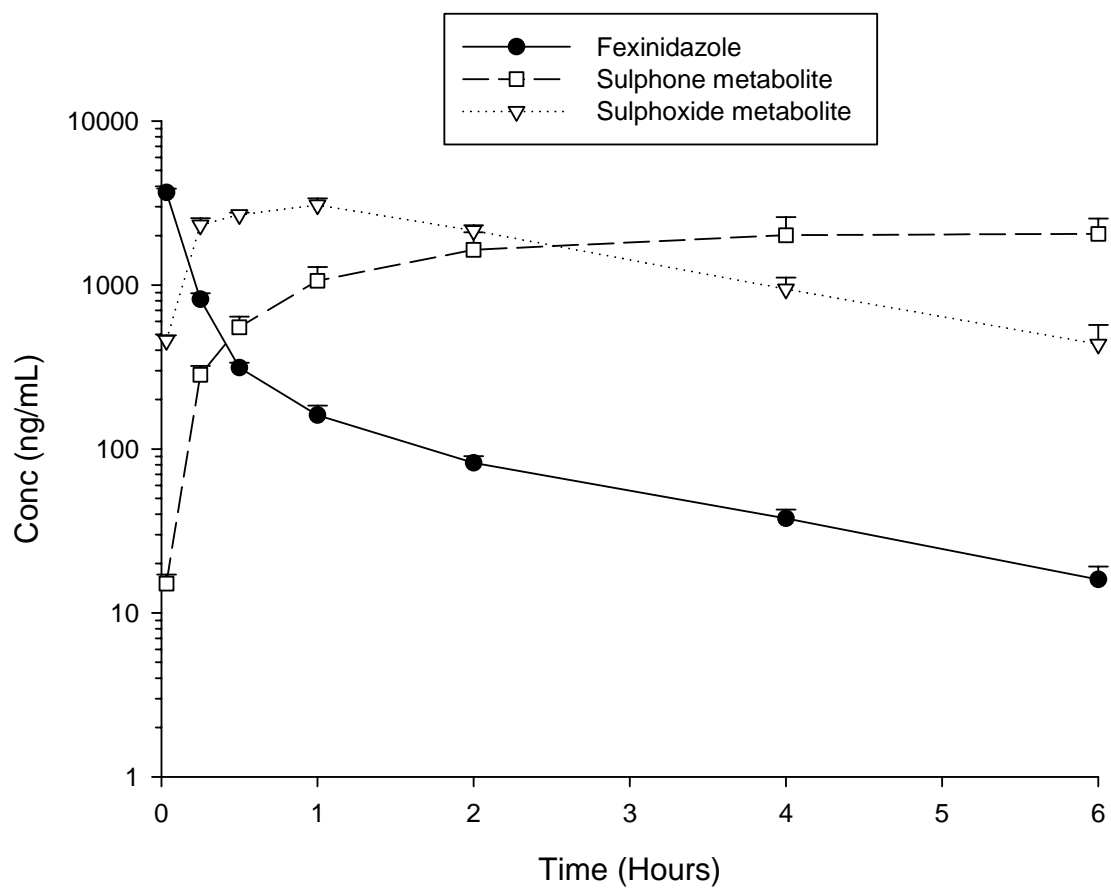

**Figure 4.** Mean ( $\pm$ SD) plasma concentrations (ng/mL) of Fexinidazole and its sulphone and sulfoxide metabolites after single oral 10 mg/kg dose of Fexinidazole in male Sprague Dawley rats.

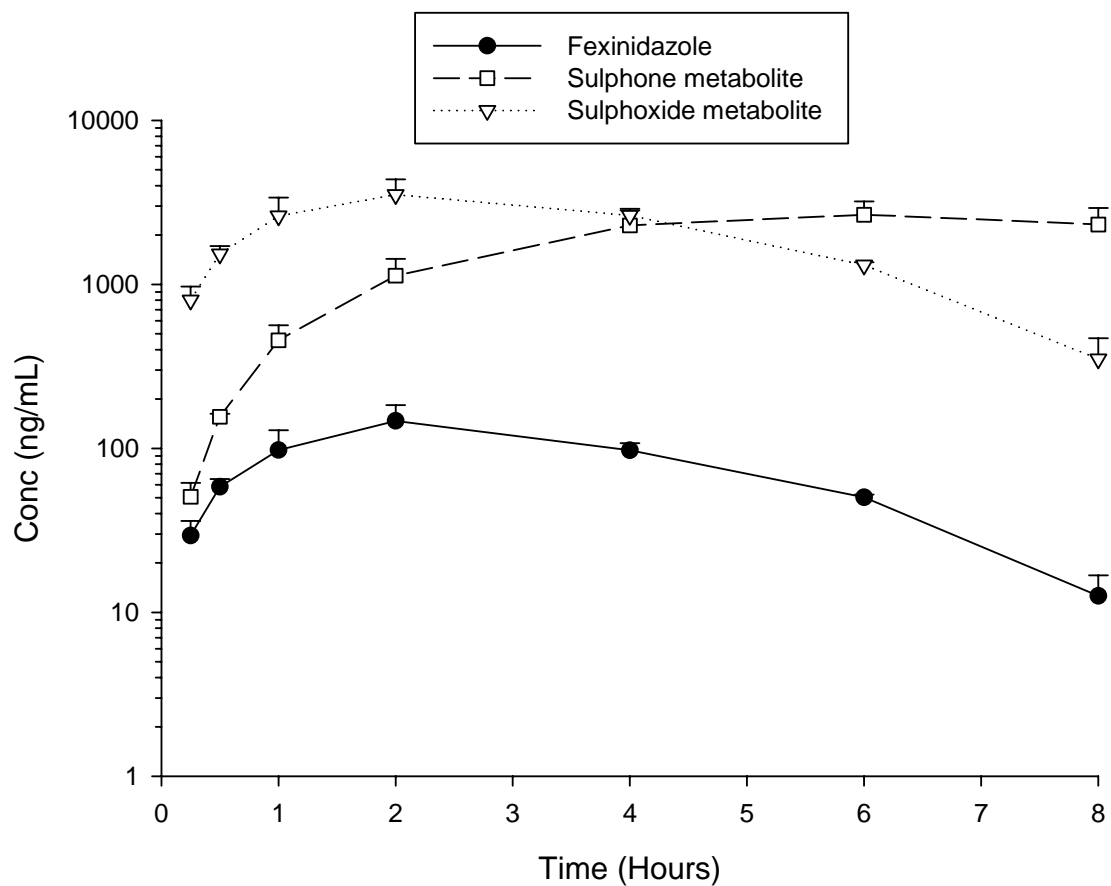

Supplement: Dataset S6 — (0.38 MB PDF) [file pntd.0000923.s007.pdf]
