# Supplementary material for: Fexinidazole – A New Oral Nitroimidazole Drug Candidate Entering Clinical Development for the Treatment of Sleeping Sickness
Source: PLoS Negl Trop Dis. 2010 Dec 21;4(12):e923. doi: 10.1371/journal.pntd.0000923 (PMC3006138; doi:10.1371/journal.pntd.0000923)

**Nifurtimox, Fexinidazole: Evaluation of the  
Pharmacokinetics after 5-day repetitive Oral  
Administration of the compounds to male NMRI mice.**

|                 |                          |
|-----------------|--------------------------|
| Products Name:  | Nifurtimox, Fexinidazole |
| Study Number:   | 0403-2007                |
| Study Director: |                          |
| Status:         | FINAL                    |

**TABLE OF CONTENTS**

|                                                             |    |
|-------------------------------------------------------------|----|
| 1. STUDY CONDUCT .....                                      | 4  |
| 2. OBJECTIVE .....                                          | 4  |
| 3. ABBREVIATIONS .....                                      | 4  |
| 4. METHODS .....                                            | 5  |
| 4.1. Study Design .....                                     | 5  |
| 4.2. Formulation Preparation and Concentration Check .....  | 5  |
| 4.3. Sample Collection and Handling .....                   | 5  |
| 4.4. Bioanalytical Method .....                             | 5  |
| 4.5. Pharmacokinetic Calculations .....                     | 5  |
| 5. RESULTS .....                                            | 6  |
| 6. CONCLUSIONS .....                                        | 7  |
| 7. CONTRIBUTORS .....                                       | 7  |
| 8. ARCHIVING .....                                          | 7  |
| 9. REFERENCES .....                                         | 7  |
| TABLES AND FIGURES .....                                    | 9  |
| APPENDICES                                                  |    |
| Appendix 1. Individual and mean plasma concentrations ..... | 13 |
| Appendix 2. Bioanalytical method for Nifurtimox .....       | 14 |
| Appendix 3. Analytical performance for Nifurtimox .....     | 15 |
| Appendix 4. Bioanalytical method for Fexinidazole .....     | 16 |
| Appendix 5. Analytical performance for Fexinidazole .....   | 16 |

## 1. STUDY CONDUCT

The study, sponsored by Drugs for Neglected Diseases *initiative* (DNDi), was performed within Accelera, Nerviano Medical Sciences, Italy according the internal Standard Operating Procedures as a non-GLP regulated study.

## 2. OBJECTIVE

Aim of this study was to evaluate the pharmacokinetics of Nifurtimox and Fexinidazole after repeated oral doses of the two compounds to male NMRI mice.

## 3. ABBREVIATIONS

The following abbreviations are used in this document:

|                          |                                                                                            |
|--------------------------|--------------------------------------------------------------------------------------------|
| AUC <sub>0-t(last)</sub> | Area under the plasma concentration vs. time curve up to the last detectable concentration |
| C <sub>max</sub>         | Maximal plasma concentration                                                               |
| CV                       | Coefficient of variation of the mean                                                       |
| h                        | Hours                                                                                      |
| ID                       | Animal identification code                                                                 |
| LC                       | Liquid chromatography                                                                      |
| LLOQ                     | Lower limit of quantification                                                              |
| MS                       | Mass-spectrometry                                                                          |
| NMRI                     | Naval Medical Research Institute                                                           |
| Norm                     | Normalized value                                                                           |
| R <sup>2</sup>           | Correlation coefficient                                                                    |
| SD                       | Standard deviation of the mean                                                             |
| STD                      | Standard sample                                                                            |
| t <sub>1/2,z</sub>       | Apparent terminal half-life                                                                |
| t <sub>max</sub>         | Time to peak plasma concentration                                                          |
| t <sub>last</sub>        | Time of the last detectable concentration                                                  |
| ULOQ                     | Upper limit of quantification                                                              |

## 4. METHODS

### 4.1. Study Design

The study was conducted according to the study protocol [1].

Nifurtimox and Fexinidazole were given orally to 3 male NMRI mice/compound by gastric gavage daily for 5 consecutive days at a dose of 200 mg/kg in a 5 % tween 80/ 0.5 % methocel vehicle.

### 4.2. Formulation Preparation and Concentration Check

The Nifurtimox and Fexinidazole suspensions, at the nominal concentration of 20 mg/mL, were prepared according to the procedure already developed [2]; a sufficient volume of each suspension was prepared in order to support the 5-day repeated oral administration. The suspensions were stored at +4°C. The supportive stability data for the Fexinidazole suspension has previously been determined [2] while a stability control on the Nifurtimox suspension after 7 days at +4°C was performed.

The concentration checks on Nifurtimox and Fexinidazole suspensions were performed using a specific, not validated, HPLC-UV method [2]. Three samples were analyzed for each suspension.

### 4.3. Sample Collection and Handling

About 0.05-0.07 mL of blood/sampling time were taken from the saphenous vein using heparinized tubes (pre-cooled in an ice/water bath) and were centrifuged at 10000g for 3 minutes at 4°C. The separated plasma was stored at -80°C until analysis. Blood was taken at 0.25, 0.5, 1, 3, 8 and 24 h post dosing.

### 4.4. Bioanalytical Method

Mouse plasma concentrations of Nifurtimox and Fexinidazole were determined using non-validated LC-MS-MS methods. The lower limit of quantification was 9.55 ng/mL for Nifurtimox and 5.00 ng/mL for Fexinidazole. Bioanalytical data are stored in Watson LIMS (v. 6.4.0.04, Thermo Fisher Scientific, Waltham, MA, USA) under Project ID: 348-Fexinidazole and Study ID 0403-2007. Details of the bioanalytical methods are reported in Appendix 2 for Nifurtimox and in Appendix 4 for Fexinidazole. Analytical performance of calibration curves is reported in Appendix 3 for Nifurtimox and in Appendix 5 for Fexinidazole.

### 4.5. Pharmacokinetic Calculations

Pharmacokinetic evaluation was carried out using a non-compartmental approach with the aid of the Watson package (v. 6.4.0.04, Thermo Fisher Scientific, Waltham, MA, USA).

For the calculations, pre-dose concentrations of both compounds were set equal to zero. After both compounds, on Day 5,  $C_{max}$  and  $t_{max}$  were read from the raw plasma data as the coordinates of the highest measured concentration. The area under plasma concentration vs.

time curve to finite time,  $AUC_{0-t(\text{last})}$ , was determined by the linear trapezoidal rule up to the last detectable concentration. The half-life of the terminal phase,  $t_{1/2,z}$ , was determined by linear regression analysis of the natural-log concentration vs. time curve, where  $t_{1/2,z} = \ln(2)/\text{slope}$  of the regression line.

$C_{\text{max}}$  and  $AUC_{0-t(\text{last})}$  values were also normalized to a 1 mg/kg dose level.

Descriptive statistics (mean  $\pm$  SD, %CV) were reported for plasma concentrations and pharmacokinetic parameters sorted by compound.

Plasma concentrations and pharmacokinetic parameters of Nifurtimox and Fexinidazole were reported to three significant figures.

## 5. RESULTS

Summary data of Day 5 mean  $\pm$ SD pharmacokinetic parameters of Nifurtimox and Fexinidazole are reported in Table 1. Individual and mean pharmacokinetic parameters of Nifurtimox and Fexinidazole are reported in Tables 2 and 3, respectively. Individual and mean plasma concentrations of both compounds are plotted in Figures 1 - 3 and reported in Tables 1A1 and 2A1 of Appendix 1.

Dose concentrations of both Nifurtimox and Fexinidazole are reported in the following table

| Sample                  | Nominal Concentration (mg/mL) | HPLC Concentration (mg/mL) | HPLC Assay % |
|-------------------------|-------------------------------|----------------------------|--------------|
| Nifurtimox Suspension   | 20                            | 19.1                       | 95.5         |
| Fexinidazole Suspension | 20                            | 19.3                       | 96.5         |

Nifurtimox and Fexinidazole suspensions were within the limits of 95-105 % of the nominal concentration. Nifurtimox suspension was stable within the limits of 90-110 % as reported in the following table

| Stability point | HPLC Concentration (mg/mL) | HPLC Assay % | Stability % |
|-----------------|----------------------------|--------------|-------------|
| Initial Time    | 19.1                       | 95.5         | 100         |
| 7 days at + 4°C | 18.2                       | 90.8         | 95.1        |

After daily oral administrations of Nifurtimox for five days, detectable concentrations of the compound were measured 15 minutes post dosing on Day 5. Mean  $\pm$ SD maximal plasma concentration of Nifurtimox was  $9250 \pm 765$  ng/mL, achieved within 3 hours post dosing. The concentrations of the compound were detectable up to 8 h post dosing. Mean  $\pm$ SD  $AUC_{0-t(\text{last})}$  was  $45700 \pm 5880$  ng·h/mL. The coefficients of variation of  $C_{\text{max}}$  and  $AUC_{0-t(\text{last})}$  were 8 and 13 %, respectively. Mean  $\pm$ SD apparent terminal half-life of the compound was  $3.12 \pm 1.45$  h.

After daily oral administrations of Fexinidazole for five days detectable concentrations of Fexinidazole were measured 15 minutes post dosing on Day 5. Mean  $\pm$ SD maximal plasma concentration of Fexinidazole was  $457 \pm 179$  ng/mL, achieved within 1 hour post dosing. The concentrations of the compound were detectable up to 8 h post dosing. Mean  $\pm$ SD AUC<sub>0-t(last)</sub> was  $1530 \pm 348$  ng·h/mL. The coefficients of variation of C<sub>max</sub> and AUC<sub>0-t(last)</sub> were 39 and 23 %, respectively. Mean  $\pm$ SD apparent terminal half-life of the compound was 2.76  $\pm$ 1.26 h.

## 6. CONCLUSIONS

After both compounds, virtually at steady state assuming invariance of the half-life after single and repeated administrations, Day 5 plasma profiles were similar. The variability of the systemic exposure descriptors was low (CV% < 40%). Systemic exposure parameters of Nifurtimox were markedly higher than those of Fexinidazole.

The comparison between systemic exposure to Fexinidazole after single 50 mg/kg (on average, C<sub>max</sub>: 154 ng/mL, AUC<sub>0-t(last)</sub>: 416 ng·h/mL [3]) and repeated 200 mg/kg/day doses of Fexinidazole with 5 % tween 80 in 0.5 % methocel indicated that both C<sub>max</sub> and AUC values increased in direct proportion with the dose, suggesting dose- and time-independent pharmacokinetics of Fexinidazole after oral dosing in this dose range.

## 7. CONTRIBUTORS

## 8. ARCHIVING

The protocol, raw data, pharmacokinetic analysis and final report were archived within Accelera Archive, Nerviano Medical Sciences, Italy, according the Unit Standard Operating Procedures.

## 9. REFERENCES

1. Nifurtimox, Fexinidazole: Evaluation of the Pharmacokinetics after 5-day repetitive Oral Administration of the compounds to male NMRI mice. Nerviano Medical Sciences Study Protocol 0403-2007-P, November 7, 2007.
2. Fexinidazole: Preformulation Study Results. Nerviano Medical Sciences report no. 0221-2007-R.

3. Fexinidazole: Evaluation of  
the Pharmacokinetics after Single IV and Oral (two formulations) Administration to  
male NMRI mice. Nerviano Medical Sciences report no. 0275-2007-R.

## TABLES AND FIGURES

**Table 1.** Summary table of Day 5 mean  $\pm$ SD pharmacokinetic parameters of Nifurtimox and Fexinidazole after repeated oral 200 mg/kg/day doses of the compounds in male NMRI mice.

| Parameter (Unit)                   | Nifurtimox       | Fexinidazole      |
|------------------------------------|------------------|-------------------|
| C <sub>max</sub> (ng/mL)           | 9250 $\pm$ 765   | 457 $\pm$ 179     |
| t <sub>max</sub> (h)               | 1.5 $\pm$ 1.32   | 0.833 $\pm$ 0.289 |
| t <sub>last</sub> (h)              | 8 $\pm$ 0        | 8 $\pm$ 0         |
| AUC <sub>0-t(last)</sub> (ng·h/mL) | 45700 $\pm$ 5880 | 1530 $\pm$ 348    |
| t <sub>1/2,z</sub> (h)             | 3.12 $\pm$ 1.45  | 2.76 $\pm$ 1.26   |

**Table 2.** Day 5 individual and mean ( $\pm$ SD, %CV) pharmacokinetic parameters of Nifurtimox after repeated oral 200 mg/kg/day of the compound in male NMRI mice.

| Parameter (Unit)                                                                      | Mouse ID |         |       | Mean  | SD   | %CV |
|---------------------------------------------------------------------------------------|----------|---------|-------|-------|------|-----|
|                                                                                       | M1       | M2      | M3    |       |      |     |
| Weight (g)                                                                            | 26.6     | 28.1    | 25.1  | 26.6  | 1.5  | 6   |
| Dose (mg/kg)                                                                          | 194      | 190     | 190   | 191   | 2.07 | 1   |
| C <sub>max</sub> (ng/mL)                                                              | 8380     | 9820    | 9550  | 9250  | 765  | 8   |
| t <sub>max</sub> (h)                                                                  | 3        | 0.5     | 1     | 1.5   | 1.32 | 88  |
| t <sub>last</sub> (h)                                                                 | 8        | 8       | 8     | 8     | 0    | 0   |
| AUC <sub>0-t(last)</sub> (ng·h/mL)                                                    | 50100    | 39000   | 47900 | 45700 | 5880 | 13  |
| Regression Range (h)                                                                  | 1 - 8    | 0.5 - 8 | 1 - 8 | N/A   | N/A  | N/A |
| t <sub>1/2,z</sub> (h)                                                                | 4.76     | 2.59    | 2.01  | 3.12  | 1.45 | 47  |
| C <sub>max, norm</sub> <sup>(1)</sup>                                                 | 43.2     | 51.6    | 50.2  | 48.3  | 4.5  | 9   |
| AUC <sub>0-t(last), norm</sub> <sup>(1)</sup>                                         | 259      | 205     | 252   | 239   | 29.4 | 12  |
| N/A: not applicable                                                                   |          |         |       |       |      |     |
| <sup>(1)</sup> C <sub>max</sub> (ng/mL) and AUC (ng·h/mL) normalized to 1 mg/kg dose. |          |         |       |       |      |     |

**Table 3.** Day 5 individual and mean ( $\pm$ SD, %CV, n=3) pharmacokinetic parameters of Fexinidazole after repeated oral 200 mg/kg/day of the compound in male NMRI mice.

| Parameter (Unit)                                                                      | Mouse ID |       |         | Mean  | SD    | %CV |
|---------------------------------------------------------------------------------------|----------|-------|---------|-------|-------|-----|
|                                                                                       | M4       | M5    | M6      |       |       |     |
| Weight (g)                                                                            | 31.1     | 32.2  | 31.1    | 31.5  | 0.635 | 2   |
| Dose (mg/kg)                                                                          | 192      | 192   | 192     | 192   | 0.335 | 0   |
| C <sub>max</sub> (ng/mL)                                                              | 318      | 394   | 659     | 457   | 179   | 39  |
| t <sub>max</sub> (h)                                                                  | 1        | 1     | 0.5     | 0.833 | 0.289 | 35  |
| t <sub>last</sub> (h)                                                                 | 8        | 8     | 8       | 8     | 0     | 0   |
| AUC <sub>0-t(last)</sub> (ng·h/mL)                                                    | 1300     | 1360  | 1930    | 1530  | 348   | 23  |
| Regression Range (h)                                                                  | 1 - 8    | 1 - 8 | 0.5 - 8 | N/A   | N/A   | N/A |
| t <sub>1/2,z</sub> (h)                                                                | 4.1      | 1.59  | 2.59    | 2.76  | 1.26  | 46  |
| C <sub>max</sub> , norm <sup>(1)</sup>                                                | 1.65     | 2.05  | 3.43    | 2.38  | 0.934 | 39  |
| AUC <sub>0-t(last)</sub> , norm <sup>(1)</sup>                                        | 6.78     | 7.1   | 10      | 7.96  | 1.77  | 22  |
| N/A: not applicable                                                                   |          |       |         |       |       |     |
| <sup>(1)</sup> C <sub>max</sub> (ng/mL) and AUC (ng·h/mL) normalized to 1 mg/kg dose. |          |       |         |       |       |     |

**Figure 1.** Day 5 individual plasma concentrations (ng/mL) of Nifurtimox after repeated oral 200 mg/kg/day of the compound in male NMRI mice.

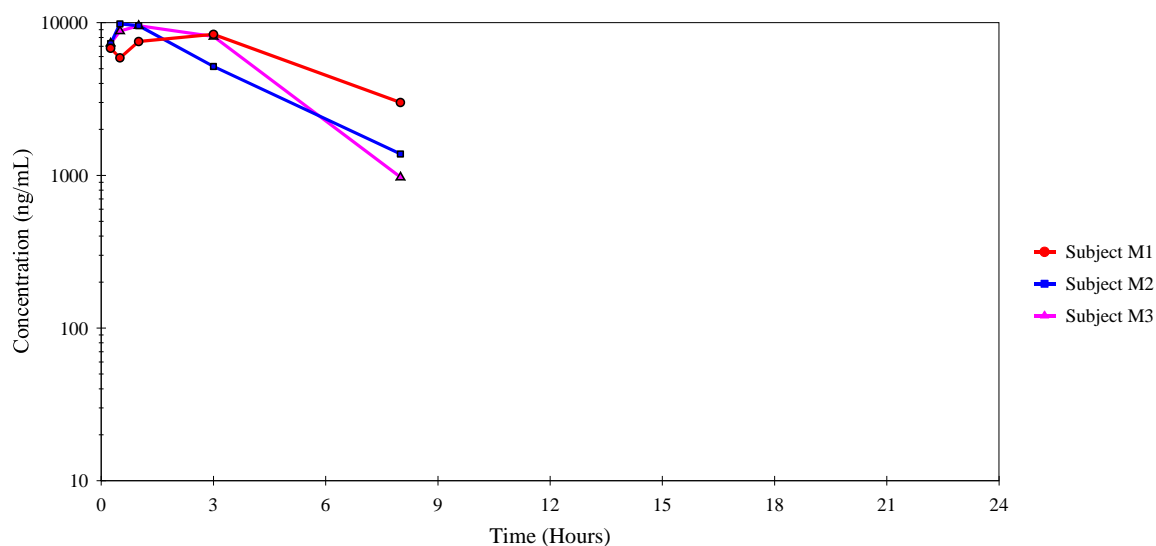

**Figure 2.** Day 5 individual plasma concentrations (ng/mL) of Fexinidazole after repeated oral 200 mg/kg/day of the compound in male NMRI mice.

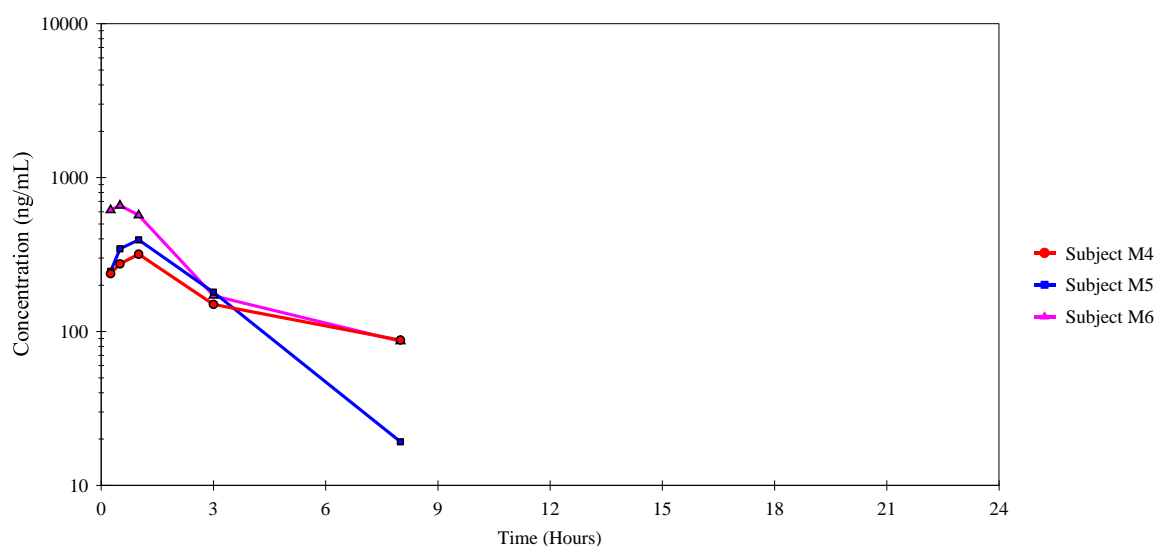

**Figure 3.** Day 5 mean ( $\pm$ SD) plasma concentrations (ng/mL) of Nifurtimox and Fexinidazole after repeated oral 200 mg/kg/day doses of the compounds in male NMRI mice.

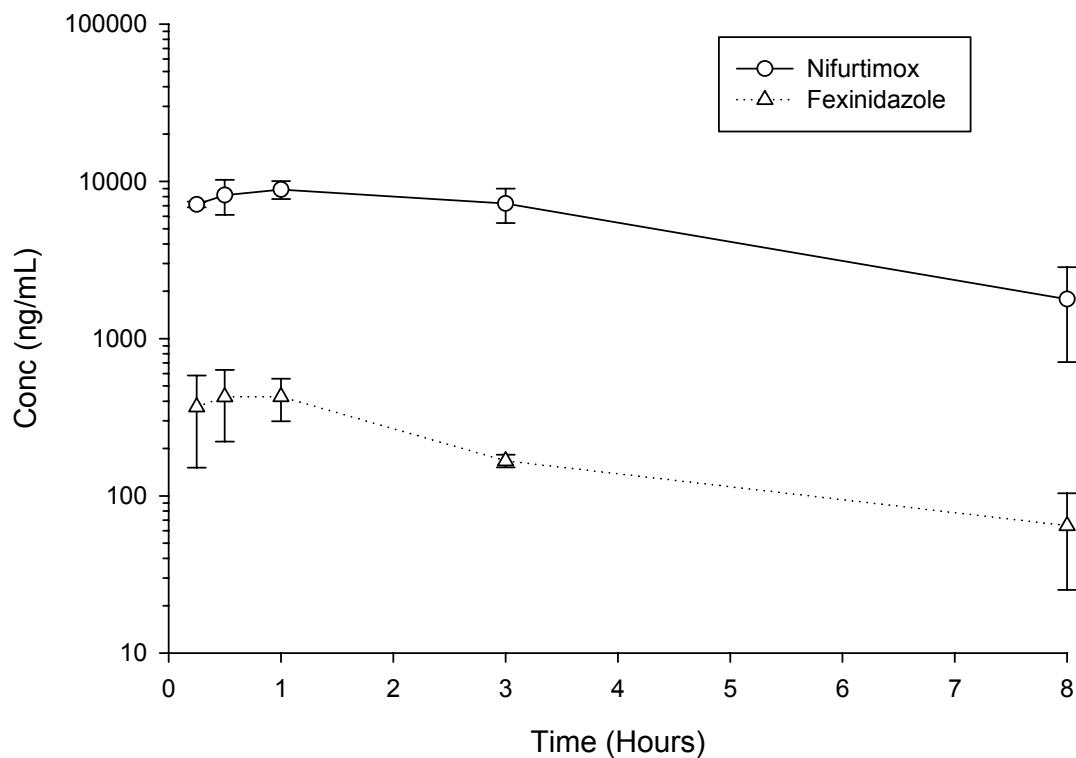

**APPENDICES****Appendix 1. Individual and mean plasma concentrations****Table 1A1.** Day 5 individual and mean ( $\pm$ SD, %CV) plasma concentrations (ng/mL) of Nifurtimox after repeated oral 200 mg/kg/day of the compound in male NMRI mice.

| Time (h)            | Mouse ID |       |       | Mean | SD   | %CV |
|---------------------|----------|-------|-------|------|------|-----|
|                     | M1       | M2    | M3    |      |      |     |
| 0.25                | 6800     | 7290  | 7330  | 7140 | 295  | 4   |
| 0.5                 | 5880     | 9820  | 8810  | 8170 | 2050 | 25  |
| 1                   | 7530     | 9560  | 9550  | 8880 | 1170 | 13  |
| 3                   | 8380     | 5170  | 8120  | 7220 | 1780 | 25  |
| 8                   | 3000     | 1380  | 972   | 1780 | 1070 | 60  |
| 24                  | <9.55    | <9.55 | <9.55 | N/A  | N/A  | N/A |
| N/A: not applicable |          |       |       |      |      |     |

**Table 2A1.** Day 5 individual and mean ( $\pm$ SD, %CV) plasma concentrations (ng/mL) of Fexinidazole after repeated oral 200 mg/kg/day of the compound in male NMRI mice.

| Time (h)            | Mouse ID |      |      | Mean | SD   | %CV |
|---------------------|----------|------|------|------|------|-----|
|                     | M4       | M5   | M6   |      |      |     |
| 0.25                | 238      | 246  | 616  | 367  | 216  | 59  |
| 0.5                 | 275      | 345  | 659  | 426  | 205  | 48  |
| 1                   | 318      | 394  | 570  | 427  | 129  | 30  |
| 3                   | 150      | 180  | 171  | 167  | 15.4 | 9   |
| 8                   | 87.9     | 19.2 | 86.5 | 64.5 | 39.3 | 61  |
| 24                  | <5       | <5   | <5   | N/A  | N/A  | N/A |
| N/A: not applicable |          |      |      |      |      |     |

**Appendix 2. Bioanalytical method for Nifurtimox****Plasma Sample Preparation:**

Standards were prepared using mouse plasma. Plasma proteins were precipitated by adding 150 µL of methanol to 20 µL of plasma in a 96 well plate. After capping and vortex mixing, the plate was centrifuged for 15 minutes at 2060 g at 6°C. An aliquot of 10 µL of the supernatant was injected onto the LC-MS-MS system.

**LC-MS/MS conditions:**

HPLC system: Hewlett Packard 1100 series  
Mobile phase: Channel A: Ammonium Formate (10 mM pH 3.5)  
Channel B: Acetonitrile

Elution mode

Gradient

Elution conditions

| Time (min) | 0.0 | 0.2 | 3.0 | 3.5 | 3.6 | 5.0 |
|------------|-----|-----|-----|-----|-----|-----|
| % A        | 90  | 90  | 10  | 10  | 90  | 90  |
| % B        | 10  | 10  | 90  | 90  | 10  | 10  |

Total Run Time: 5.0 minutes

Flow rate: 1.0 mL/min

Approximate retention time: Nifurtimox: about 2.8 min.

Column oven temp. 45 °C

Analytical column: Zorbax SB C8 75\*4.6 mm, 3.5 µm

Autosampler type: CTC PAL

Injection volume: 10 µL

Autosampler temperature: 10 °C

MS instrument: Perkin Elmer SCIEX API 4000

Ionisation: TURBO ION SPRAY in positive ion mode

MRM transition: Fexinidazole: 288 → 148 m/z

Resolution Q1 Unit

Q3 Low

LLOQ 9.55 ng/mL

ULOQ 9950 ng/mL

Batch No. of standard 110817-0157-001

Software used

Acquisition and processing: Analyst 1.4.1

Import data from Analyst file: 0403-2007-Run2a.rdb

Data file in Analyst: 0403-2007\Run2.wiff

# CONFIDENTIAL

Nifurtimox, Fexinidazole  
Pharmacokinetic Report for the study No. 0403-2007

0403-2007-R

## Appendix 3. Analytical performance for Nifurtimox

**Table 1A3. Analytical Performance: Back-Calculated Concentrations (ng/mL) of Nifurtimox Calibration Standard in Mouse Plasma for Study Protocol 0403-2007.**

| Assay Date  | Analytical Run Number | STD.1<br>9.55<br>ng/mL | STD.2<br>20.6<br>ng/mL | STD.3<br>50.0<br>ng/mL | STD.4<br>95.5<br>ng/mL | STD.5<br>256<br>ng/mL | STD.6<br>500<br>ng/mL | STD.7<br>955<br>ng/mL | STD.8<br>5100<br>ng/mL | STD.9<br>9950<br>ng/mL |
|-------------|-----------------------|------------------------|------------------------|------------------------|------------------------|-----------------------|-----------------------|-----------------------|------------------------|------------------------|
| 29-Nov-2007 | 2                     | 8.64                   | 19.8                   | 55                     | 95.2                   | 279                   | 516                   | 1040                  | 6040                   | 9240                   |
|             |                       | 10.6                   | *11.3                  | 48.9                   | 84.6                   | 209                   | 463                   | 819                   | 5980                   | 9210                   |
|             |                       |                        |                        |                        |                        |                       |                       |                       |                        |                        |
| Mean        |                       | 9.62                   | 19.8                   | 52                     | 89.9                   | 244                   | 490                   | 930                   | 6010                   | 9230                   |
| SD          |                       | 1.39                   |                        | 4.31                   | 7.5                    | 49.5                  | 37.5                  | 156                   | 42.4                   | 21.2                   |
| %CV         |                       | 14.4                   |                        | 8.3                    | 8.3                    | 20.3                  | 7.7                   | 16.8                  | 0.7                    | 0.2                    |
| %Bias       |                       | 0.7                    | -3.9                   | 4                      | -5.9                   | -4.7                  | -2                    | -2.6                  | 17.8                   | -7.2                   |
| n           |                       | 2                      | 1                      | 2                      | 2                      | 2                     | 2                     | 2                     | 2                      | 2                      |

\* Accuracy more than 20%; excluded from regression analysis.

**Table 2A3. Calibration Curve Parameters for Nifurtimox Calibration Standards in Mouse Plasma for Study Protocol 0403-2007.**

| Run Date    | Curve Number | A         | B       | C       | R <sup>2</sup> | LLOQ<br>ng/mL | ULOQ<br>ng/mL | Regression<br>Footnote(s) |
|-------------|--------------|-----------|---------|---------|----------------|---------------|---------------|---------------------------|
| 29-Nov-2007 | 2            | 0.0017842 | 50.6596 | 63.9823 | 0.9818         | 9.55          | 9950          | 1                         |
|             |              |           |         |         |                |               |               |                           |
| Mean        |              | 0.0017842 | 50.6596 | 63.9823 | 0.9818         |               |               |                           |
| SD          |              |           |         |         |                |               |               |                           |
| %CV         |              |           |         |         |                |               |               |                           |
| n           |              | 1         | 1       | 1       | 1              |               |               |                           |

Regression Footnote(s):

1) Resp. = A \* (Conc.\*\*2) + B \* Conc. + C

**Appendix 4. Bioanalytical method for Fexinidazole****Plasma Sample Preparation:**

Standards were prepared using mouse plasma. Plasma proteins were precipitated by adding 200 µL of methanol to 25 µL of plasma in a 96 well plate. After capping and vortex mixing, the plate was centrifuged for 10 minutes at 2060 g at 6°C. An aliquot of 100 µL of supernatant was transferred in a 96 well plate and mixed with 100 µL of 10 mM ammonium formate pH 3.5 injected onto the LC-MS-MS system.

**LC-MS/MS conditions:**

HPLC system: Hewlett Packard 1100 series  
Mobile phase: Channel A: Ammonium Formate (10 mM pH 3.5)  
Channel B: Methanol

Elution mode

Gradient

Elution conditions

| Time (min) | 0.0 | 2.10 | 2.30 | 5.00 | 5.20 | 6.00 |
|------------|-----|------|------|------|------|------|
| % A        | 65  | 65   | 40   | 40   | 65   | 65   |
| % B        | 35  | 35   | 60   | 60   | 35   | 35   |

Total Run Time: 6.0 minutes  
Flow rate: 1.0 mL/min  
Approximate retention time: Fexinidazole: about 4.7 min.  
Column oven temp.: 40 °C  
Analytical column: Chromolith RP-18 50 \* 4.6 mm (Merck)

Autosampler type: Perkin Elmer PE 200  
Injection volume: 10 µL  
Autosampler temperature: RT

MS instrument: Perkin Elmer SCIEX API 4000  
Ionisation: TURBO ION SPRAY in positive ion mode  
MRM transition: Fexinidazole: 280 → 140 m/z

Resolution Q1 Unit  
Q3 Unit  
LLOQ 5.00 ng/mL  
ULOQ 5000 ng/mL  
Batch No. of standard 07285/23

Software used

Acquisition and processing: Analyst 1.4.1  
Import data from Analyst file: 0403-2007-Run1.rdb  
Data file in Analyst: 0403-2007\Run1.wiff

**Appendix 5. Analytical performance for Fexinidazole**

CONFIDENTIAL

Nifurtimox, Fexinidazole  
Pharmacokinetic Report for the study No. 0403-2007

0403-2007-R

| <b>Table 1A5. Analytical Performance: Back-Calculated Concentrations (ng/mL) of Fexinidazole Calibration Standard in Mouse Plasma for Study Protocol 0403-2007.</b> |                       |                        |                        |                        |                       |                       |                        |                        |                        |
|---------------------------------------------------------------------------------------------------------------------------------------------------------------------|-----------------------|------------------------|------------------------|------------------------|-----------------------|-----------------------|------------------------|------------------------|------------------------|
| Assay Date                                                                                                                                                          | Analytical Run Number | STD.1<br>5.00<br>ng/mL | STD.2<br>10.0<br>ng/mL | STD.3<br>50.0<br>ng/mL | STD.4<br>100<br>ng/mL | STD.5<br>500<br>ng/mL | STD.6<br>1000<br>ng/mL | STD.7<br>4000<br>ng/mL | STD.8<br>5000<br>ng/mL |
| 26-Nov-2007                                                                                                                                                         | 1                     | 5.58                   | 9.7                    | 55.6                   | 103                   | 453                   | 965                    | 4240                   | 5480                   |
|                                                                                                                                                                     |                       | 4.47                   | *7.74                  | 47.2                   | 95.5                  | *411                  | 929                    | 4060                   | 5040                   |
|                                                                                                                                                                     |                       |                        |                        |                        |                       |                       |                        |                        |                        |
| Mean                                                                                                                                                                |                       | 5.03                   | 9.7                    | 51.4                   | 99.3                  | 453                   | 947                    | 4150                   | 5260                   |
| SD                                                                                                                                                                  |                       | 0.785                  |                        | 5.94                   | 5.3                   |                       | 25.5                   | 127                    | 311                    |
| %CV                                                                                                                                                                 |                       | 15.6                   |                        | 11.6                   | 5.3                   |                       | 2.7                    | 3.1                    | 5.9                    |
| %Bias                                                                                                                                                               |                       | 0.6                    | -3                     | 2.8                    | -0.7                  | -9.4                  | -5.3                   | 3.8                    | 5.2                    |
| n                                                                                                                                                                   |                       | 2                      | 1                      | 2                      | 2                     | 1                     | 2                      | 2                      | 2                      |
| * Accuracy more than 15%; excluded from regression analysis.                                                                                                        |                       |                        |                        |                        |                       |                       |                        |                        |                        |

| <b>Table 2A5. Calibration Curve Parameters for Fexinidazole Calibration Standards in Mouse Plasma for Study Protocol 0403-2007.</b> |              |         |           |                |               |               |                           |
|-------------------------------------------------------------------------------------------------------------------------------------|--------------|---------|-----------|----------------|---------------|---------------|---------------------------|
| Run Date                                                                                                                            | Curve Number | Slope   | Intercept | R <sup>2</sup> | LLOQ<br>ng/mL | ULOQ<br>ng/mL | Regression<br>Footnote(s) |
| 26-Nov-2007                                                                                                                         | 1            | 2103.67 | 1116.07   | 0.9931         | 5             | 5000          | 1                         |
|                                                                                                                                     |              |         |           |                |               |               |                           |
| Mean                                                                                                                                |              | 2103.67 | 1116.07   | 0.9931         |               |               |                           |
| SD                                                                                                                                  |              |         |           |                |               |               |                           |
| %CV                                                                                                                                 |              |         |           |                |               |               |                           |
| n                                                                                                                                   |              | 1       | 1         | 1              |               |               |                           |
| Regression Footnote(s):<br>1) Resp. = Slope * Conc. + Intercept                                                                     |              |         |           |                |               |               |                           |

## **Amendment 1**

### **Nifurtimox, Fexinidazole: Evaluation of the Pharmacokinetics after 5-day repetitive oral administration of the compounds to Male NMRI Mice.**

|                   |              |
|-------------------|--------------|
| Study Number      | 0403-2007    |
| Document Number   | 0403-2007-R  |
| Amendment Number: | 1            |
| Test Article:     | Fexinidazole |
| Study Director:   |              |

## **1. SPECIFIC CHANGE(S)**

### **1.1. Description(s) of Change(s)**

After specific request of the Sponsor, the remaining stored plasma aliquots of the blood samples were used to evaluate the pharmacokinetics of the sulphone and sulfoxide metabolites of Fexinidazole.

#### **1.1.1. Reason(s) for Change(s)**

Analysis was performed on the remaining plasma aliquots to evaluate the pharmacokinetics of the sulphone and sulfoxide metabolites of Fexinidazole.

### **1.2. Description(s) of Change(s)**

The following Appendix 6 refers to the evaluation of the pharmacokinetics of the sulphone and sulfoxide metabolites of Fexinidazole and has to be intended as integration of the report 0403-2007-R. The report 0403-2007-R was not modified.

#### **1.2.1. Reason(s) for Change(s)**

To evaluate the pharmacokinetics of the sulphone and sulfoxide metabolites of Fexinidazole.

**Appendix 6. Evaluation of the pharmacokinetics of sulphone and sulfoxide metabolites of Fexinidazole****TABLE OF CONTENTS**

|                                         |   |
|-----------------------------------------|---|
| APPROVAL SIGNATURES.....                | 2 |
| 1. SPECIFIC CHANGE(S).....              | 3 |
| 1.1. Description(s) of Change(s) .....  | 3 |
| 1.1.1. Reason(s) for Change(s).....     | 3 |
| 1.2. Description(s) of Change(s) .....  | 3 |
| 1.2.1. Reason(s) for Change(s).....     | 3 |
| 2. ABBREVIATIONS .....                  | 5 |
| 3. METHODS .....                        | 5 |
| 3.1. Bioanalytical Method .....         | 5 |
| 3.2. Pharmacokinetic Calculations ..... | 5 |
| 4. RESULTS .....                        | 6 |
| 5. CONCLUSIONS.....                     | 6 |
| 6. CONTRIBUTORS.....                    | 7 |
| 7. ARCHIVING .....                      | 7 |
| 8. TABLES AND FIGURES .....             | 8 |

## 2. ABBREVIATIONS

The following abbreviations are used in this document:

|                          |                                                                        |
|--------------------------|------------------------------------------------------------------------|
| AUC <sub>0-t(last)</sub> | Area under the plasma concentration vs. time curve up to finite time   |
| AUC <sub>0-∞</sub>       | Area under the plasma concentration vs. time curve up to infinite time |
| C <sub>max</sub>         | Maximal plasma concentration                                           |
| CV                       | Coefficient of variation of the mean                                   |
| h                        | Hours                                                                  |
| LC                       | Liquid chromatography                                                  |
| LLOQ                     | Lower limit of quantification                                          |
| MS                       | Mass-spectrometry                                                      |
| Norm                     | Normalized value                                                       |
| R <sup>2</sup>           | Correlation coefficient                                                |
| SD                       | Standard deviation of the mean                                         |
| STD                      | Standard sample                                                        |
| t <sub>max</sub>         | Time to peak plasma concentration                                      |
| t <sub>last</sub>        | Time of the last detectable concentration                              |
| ULOQ                     | Upper limit of quantification                                          |

## 3. METHODS

### 3.1. Bioanalytical Method

Plasma concentrations of sulfoxide and sulphone Fexinidazole metabolites were determined by a LC-MS-MS method. The lower limit of the bioanalytical method was 5 ng/mL (run 1) and 25 ng/mL (run 3) for both compounds. Bioanalytical data were stored in Watson LIMS (v. 6.4.0.04, Thermo Fisher Scientific, Waltham, MA, USA). Details of the bioanalytical method are reported in Table 1. Analytical performance of calibration standards and calibration curve parameters are reported in Tables 2-9.

### 3.2. Pharmacokinetic Calculations

Pharmacokinetic evaluations of the sulphone and sulfoxide metabolites were carried out using non-compartmental approach with the aid of the Watson package (v. 6.4.0.04, Thermo Fisher Scientific, Waltham, MA, USA).

After both doses, for the calculations, the pre-dose concentrations of the metabolites were set equal to zero.

C<sub>max</sub> and t<sub>max</sub> were read from raw data as the coordinates of the highest measured concentration. The area under plasma concentration vs. time curve up to finite time, AUC<sub>0-t(last)</sub>, was determined by the linear trapezoidal rule up to the last detectable concentration.

Metabolite to parent ratio was calculated based on C<sub>max</sub> and AUC<sub>0-t(last)</sub> values.

C<sub>max</sub> and AUC<sub>0-t(last)</sub> values of both metabolites were also normalized to a 1 mg/kg dose level.

The half-life of the terminal phase,  $t_{1/2,z}$ , was determined by linear regression analysis of the natural-log concentration vs. time curve, where  $t_{1/2,z} = \ln(2)/\text{slope}$  of the regression line. The area under the concentration vs. time curve up to infinite time,  $AUC_{0-\infty}$ , was determined as

$$AUC_{0-\infty} = AUC_{0-t(\text{last})} + \frac{C_t(\text{last}) \cdot t_{1/2,z}}{\ln(2)}$$

Descriptive statistics (mean  $\pm$ SD, %CV) were reported for plasma concentrations and pharmacokinetic parameters of both metabolites.

Plasma concentrations and pharmacokinetic parameters of both metabolites were reported to three significant figures.

## 4. RESULTS

Individual and mean plasma concentrations of the sulphone and sulfoxide metabolites of Fexinidazole are reported in Tables 10 and 11, respectively, whilst the corresponding parameters are reported in Tables 12 and 13. Individual plasma concentrations of the sulphone and sulfoxide metabolites are plotted in Figures 1-2 and 3-4, respectively, whilst the corresponding mean concentrations with those of the parent compound are reported in Figure 5.

After repeated oral dosing of Fexinidazole, detectable plasma concentrations of the sulphone metabolite was measured at the first sampling time (mean $\pm$ SD: 17.6  $\mu\text{g/mL}$ ). The maximal concentration of the sulphone metabolite was, on average, 77.6  $\mu\text{g/mL}$ , and was achieved 3 h post dosing. Detectable concentrations of the compound were measured up to the last sampling time (24 h post dosing). The half-life of the compound was on average 2.75 h. The  $AUC_{0-t(\text{last})}$  value was, on average, 1050  $\mu\text{g}\cdot\text{h/mL}$  with a corresponding  $AUC_{0-\infty}$  of 1060  $\mu\text{g}\cdot\text{h/mL}$ . The systemic exposure to the metabolite was much higher than that of the parent compound. The metabolite to parent  $AUC_{0-t(\text{last})}$  ratio was, on average, 716 with a  $C_{\text{max}}$  ratio of 192, respectively.

The mean maximal concentration of the sulfoxide was 33.6  $\mu\text{g/mL}$ , achieved earlier than the sulphone metabolite ( $t_{\text{max}}$  within 1 h post dosing). Detectable concentrations of the compound were measured in two out of three animals up to the last sampling time. The mean  $AUC_{0-t(\text{last})}$  value was on average 161  $\mu\text{g}\cdot\text{h/mL}$ , with a corresponding  $AUC_{0-\infty}$  of 197  $\mu\text{g}\cdot\text{h/mL}$ . The half-life of the sulfoxide metabolite was on average 4.31 h. The metabolite to parent  $AUC_{0-t(\text{last})}$  ratio was, on average, 101 whereas the corresponding  $C_{\text{max}}$  ratio was 77.4

## 5. CONCLUSIONS

After both doses, the coefficient of variation of the mean systemic exposure parameters of both metabolites was low, being at most 25 %.

After repeated oral dosing in NMRI mice, Fexinidazole was extensively metabolized to the sulphone and sulfoxide derivatives.

## **6. CONTRIBUTORS**

## **7. ARCHIVING**

The protocol, raw data, pharmacokinetic analysis and final report were archived within Accelera Archive, Nerviano Medical Sciences, Italy, according the Unit Standard Operating Procedures.

## 8. TABLES AND FIGURES

**Table 1.** Bio-analytical method.Plasma Sample Preparation

Plasma proteins were precipitated by adding 200 µL of methanol containing 50 ng/mL of [<sup>2</sup>H<sub>3</sub>]Fexinidazole as Stable Labelled Internal Standard to 25 µL of mouse plasma in a 96 well plate. After capping and vortex mixing, the plate was centrifuged for 10 minutes at 4000 rpm at 6°C. An aliquot of 100 µL of supernatant was transferred in a 96 well plate and mixed with 200 µL of 10 mM ammonium formate pH 3.5. Aliquots of 10 µL were then injected onto the LC-MS-MS system.

LC-MS/MS conditions

|                             |                                                                                                                                                       |     |       |      |       |      |      |
|-----------------------------|-------------------------------------------------------------------------------------------------------------------------------------------------------|-----|-------|------|-------|------|------|
| HPLC system:                | Hewlett Packard 1100 series                                                                                                                           |     |       |      |       |      |      |
| Mobile phase:               | Channel A: Ammonium Formate (10 mM pH 3.5)<br>Channel B: Methanol                                                                                     |     |       |      |       |      |      |
| Elution mode:               | Gradient                                                                                                                                              |     |       |      |       |      |      |
| Elution conditions:         | Time (min)                                                                                                                                            | 0.0 | 2.10  | 2.30 | 5.00  | 5.20 | 6.00 |
|                             | % A                                                                                                                                                   | 65  | 65    | 40   | 40    | 65   | 65   |
|                             | % B                                                                                                                                                   | 35  | 35    | 60   | 60    | 35   | 35   |
| Total Run Time:             | 6.0 minutes                                                                                                                                           |     |       |      |       |      |      |
| Flow rate:                  | 1.0 mL/min                                                                                                                                            |     |       |      |       |      |      |
| Approximate retention time: | Fexinidazole sulphoxide (M1): about 1.82 min<br>Fexinidazole sulphone (M2): about 1.94 min<br>[ <sup>2</sup> H <sub>3</sub> ]Fexinidazole: about 4.83 |     |       |      |       |      |      |
| Column oven temperature:    | 40 °C                                                                                                                                                 |     |       |      |       |      |      |
| Analytical column:          | Chromolith RP-18 (50 * 4.6 mm, Merck)                                                                                                                 |     |       |      |       |      |      |
| Autosampler type:           | CTC PAL                                                                                                                                               |     |       |      |       |      |      |
| Injection volume:           | 10 µL                                                                                                                                                 |     |       |      |       |      |      |
| Autosampler temperature:    | +4°C                                                                                                                                                  |     |       |      |       |      |      |
| MS instrument:              | Perkin Elmer SCIEX API 4000                                                                                                                           |     |       |      |       |      |      |
| Ionisation:                 | TURBO ION SPRAY in positive ion mode                                                                                                                  |     |       |      |       |      |      |
| MRM transitions:            | M1                                                                                                                                                    | m/z | 296.2 | m/z  | 140.2 |      |      |
|                             | M2                                                                                                                                                    | m/z | 312.2 | m/z  | 140.2 |      |      |
|                             | [ <sup>2</sup> H <sub>3</sub> ]Fexinidazole                                                                                                           | m/z | 283.2 | m/z  | 143.2 |      |      |
| Resolution: Q1              | Unit                                                                                                                                                  |     |       |      |       |      |      |
| Q3                          | Unit                                                                                                                                                  |     |       |      |       |      |      |
| Software used:              |                                                                                                                                                       |     |       |      |       |      |      |
| Acquisition:                | Analyst 1.4.1                                                                                                                                         |     |       |      |       |      |      |
| LIMS database:              | Watson v. 6.4.0.04                                                                                                                                    |     |       |      |       |      |      |

**Table 2.** Analytical Performance: Back-Calculated Concentrations (ng/mL) of Fexinidazole Sulphoxide Calibration Standard in Mouse Plasma for Study Protocol 0403-2007.

| Assay Date                                                  | Analytical Run Number | 5.00 ng/mL | 10.0 ng/mL | 50.0 ng/mL | 100 ng/mL | 500 ng/mL | 1000 ng/mL | 4000 ng/mL | 5000 ng/mL |
|-------------------------------------------------------------|-----------------------|------------|------------|------------|-----------|-----------|------------|------------|------------|
| 26-Nov-2007                                                 | 1                     | 5.11       | 10.1       | 56.6       | 105       | 514       | 980        | 4050       | 5200       |
|                                                             |                       | 4.82       | *7.22      | 46.3       | 102       | 466       | 948        | 4020       | 4640       |
|                                                             |                       |            |            |            |           |           |            |            |            |
| Mean                                                        |                       | 4.97       | 10.1       | 51.5       | 104       | 490       | 964        | 4040       | 4920       |
| S.D.                                                        |                       | 0.205      |            | 7.28       | 2.12      | 33.9      | 22.6       | 21.2       | 396        |
| %CV                                                         |                       | 4.1        |            | 14.1       | 2         | 6.9       | 2.3        | 0.5        | 8          |
| %Bias                                                       |                       | -0.6       | 1          | 3          | 4         | -2        | -3.6       | 1          | -1.6       |
| n                                                           |                       | 2          | 1          | 2          | 2         | 2         | 2          | 2          | 2          |
| * Accuracy more than 15%: excluded from regression analysis |                       |            |            |            |           |           |            |            |            |

**Table 3.** Analytical Performance: Back-Calculated Concentrations (ng/mL) of Fexinidazole Sulphoxide Calibration Standard in Mouse Plasma for Study Protocol 0403-2007.

| Assay Date                                                  | Analytical Run Number | STD.1<br>25.0<br>ng/mL | STD.2<br>50.0<br>ng/mL | STD.3<br>250<br>ng/mL | STD.4<br>500<br>ng/mL | STD.5<br>2500<br>ng/mL | STD.6<br>5000<br>ng/mL | STD.7<br>22500<br>ng/mL | STD.8<br>25000<br>ng/mL |
|-------------------------------------------------------------|-----------------------|------------------------|------------------------|-----------------------|-----------------------|------------------------|------------------------|-------------------------|-------------------------|
| 26-Feb-2008                                                 | 3                     | 25.9                   | 50.7                   | *298                  | 536                   | 2780                   | 4820                   | 20200                   | 21400                   |
|                                                             |                       | 22.7                   | 53.8                   | *299                  | 559                   | 2710                   | 4860                   | 21400                   | 23400                   |
|                                                             |                       |                        |                        |                       |                       |                        |                        |                         |                         |
| Mean                                                        |                       | 24.3                   | 52.3                   |                       | 548                   | 2750                   | 4840                   | 20800                   | 22400                   |
| S.D.                                                        |                       | 2.26                   | 2.19                   |                       | 16.3                  | 49.5                   | 28.3                   | 849                     | 1410                    |
| %CV                                                         |                       | 9.3                    | 4.2                    |                       | 3                     | 1.8                    | 0.6                    | 4.1                     | 6.3                     |
| %Bias                                                       |                       | -2.8                   | 4.6                    |                       | 9.6                   | 10                     | -3.2                   | -7.6                    | -10.4                   |
| n                                                           |                       | 2                      | 2                      |                       | 2                     | 2                      | 2                      | 2                       | 2                       |
| * Accuracy more than 15%: excluded from regression analysis |                       |                        |                        |                       |                       |                        |                        |                         |                         |

**Table 4.** Calibration Curve Parameters for Fexinidazole Sulphoxide Calibration Standards in Mouse Plasma for Study Protocol 0403-2007.

| Run Date                                                                                        | Curve Number | Slope  | Intercept | R-Squared | LLOQ ng/mL | ULOQ ng/mL | Regression Footnote(s) |
|-------------------------------------------------------------------------------------------------|--------------|--------|-----------|-----------|------------|------------|------------------------|
| 26-Nov-2007                                                                                     | 1            | 1574.6 | -1167.22  | 0.9962    | 5          | 5000       | 1                      |
|                                                                                                 |              |        |           |           |            |            |                        |
| Mean                                                                                            |              | 1574.6 | -1167.22  | 0.9962    |            |            |                        |
| n                                                                                               |              | 1      | 1         | 1         |            |            |                        |
| Regression Footnote(s):<br>1) Resp. = Slope * Conc. + Intercept; no Internal Standard was used. |              |        |           |           |            |            |                        |

**Table 5.** Calibration Curve Parameters for Fexinidazole Sulphoxide Calibration Standards in Mouse Plasma for Study Protocol 0403-2007.

| Run Date                                                                                                                                    | Curve Number | Slope     | Intercept | R-Squared | LLOQ ng/mL | ULOQ ng/mL | Regression Footnote(s) |
|---------------------------------------------------------------------------------------------------------------------------------------------|--------------|-----------|-----------|-----------|------------|------------|------------------------|
| 26-Feb-2008                                                                                                                                 | 3            | 0.0035315 | 0.023647  | 0.9908    | 25         | 25000      | 1                      |
|                                                                                                                                             |              |           |           |           |            |            |                        |
| Mean                                                                                                                                        |              | 0.0035315 | 0.023647  | 0.9908    |            |            |                        |
| n                                                                                                                                           |              | 1         | 1         | 1         |            |            |                        |
| Regression Footnote(s):<br>1) Resp. = Slope * Conc. + Intercept; [ <sup>2</sup> H <sub>3</sub> ]Fexinidazole as Internal Standard was used. |              |           |           |           |            |            |                        |

**Table 6.** Analytical Performance: Back-Calculated Concentrations (ng/mL) of Fexinidazole Sulphone Calibration Standard in Mouse Plasma for Study Protocol 0403-2007.

| Assay Date                                                  | Analytical Run Number | STD.1<br>5.00<br>ng/mL | STD.2<br>10.0<br>ng/mL | STD.3<br>50.0<br>ng/mL | STD.4<br>100<br>ng/mL | STD.5<br>500<br>ng/mL | STD.6<br>1000<br>ng/mL | STD.7<br>4000<br>ng/mL | STD.8<br>5000<br>ng/mL |
|-------------------------------------------------------------|-----------------------|------------------------|------------------------|------------------------|-----------------------|-----------------------|------------------------|------------------------|------------------------|
| 26-Nov-2007                                                 | 1                     | 5.3                    | 10.2                   | 54.9                   | 105                   | 492                   | 970                    | 4160                   | 5450                   |
|                                                             |                       | 4.62                   | *7.62                  | 47.5                   | 101                   | 439                   | 927                    | 4070                   | 4900                   |
|                                                             |                       |                        |                        |                        |                       |                       |                        |                        |                        |
| Mean                                                        |                       | 4.96                   | 10.2                   | 51.2                   | 103                   | 466                   | 949                    | 4120                   | 5180                   |
| S.D.                                                        |                       | 0.481                  |                        | 5.23                   | 2.83                  | 37.5                  | 30.4                   | 63.6                   | 389                    |
| %CV                                                         |                       | 9.7                    |                        | 10.2                   | 2.7                   | 8                     | 3.2                    | 1.5                    | 7.5                    |
| %Bias                                                       |                       | -0.8                   | 2                      | 2.4                    | 3                     | -6.8                  | -5.1                   | 3                      | 3.6                    |
| n                                                           |                       | 2                      | 1                      | 2                      | 2                     | 2                     | 2                      | 2                      | 2                      |
| * Accuracy more than 15%: excluded from regression analysis |                       |                        |                        |                        |                       |                       |                        |                        |                        |

**Table 7.** Analytical Performance: Back-Calculated Concentrations (ng/mL) of Fexinidazole Sulphone Calibration Standard in Mouse Plasma for Study Protocol 0403-2007.

| Assay Date                                                  | Analytical Run Number | STD.1<br>25.0<br>ng/mL | STD.2<br>50.0<br>ng/mL | STD.3<br>250<br>ng/mL | STD.4<br>500<br>ng/mL | STD.5<br>2500<br>ng/mL | STD.6<br>5000<br>ng/mL | STD.7<br>22500<br>ng/mL | STD.8<br>25000<br>ng/mL |
|-------------------------------------------------------------|-----------------------|------------------------|------------------------|-----------------------|-----------------------|------------------------|------------------------|-------------------------|-------------------------|
| 26-Feb-2008                                                 | 3                     | 24.6                   | 46.1                   | 268                   | 475                   | 2590                   | 4720                   | 24900                   | *                       |
|                                                             |                       | 25.8                   | 51.4                   | 261                   | 487                   | 2600                   | 4770                   | *                       | *                       |
|                                                             |                       |                        |                        |                       |                       |                        |                        |                         |                         |
| Mean                                                        |                       | 25.2                   | 48.8                   | 265                   | 481                   | 2600                   | 4750                   | 24900                   |                         |
| S.D.                                                        |                       | 0.849                  | 3.75                   | 4.95                  | 8.49                  | 7.07                   | 35.4                   |                         |                         |
| %CV                                                         |                       | 3.4                    | 7.7                    | 1.9                   | 1.8                   | 0.3                    | 0.7                    |                         |                         |
| %Bias                                                       |                       | 0.8                    | -2.4                   | 6                     | -3.8                  | 4                      | -5                     | 10.7                    |                         |
| n                                                           |                       | 2                      | 2                      | 2                     | 2                     | 2                      | 2                      | 1                       |                         |
| * Accuracy more than 15%: excluded from regression analysis |                       |                        |                        |                       |                       |                        |                        |                         |                         |

**Table 8.** Calibration Curve Parameters for Fexinidazole Sulphone Calibration Standards in Mouse Plasma for Study Protocol 0403-2007.

| Run Date                                                                                        | Curve Number | Slope   | Intercept | R-Squared | LLOQ ng/mL | ULOQ ng/mL | Regression Footnote(s) |
|-------------------------------------------------------------------------------------------------|--------------|---------|-----------|-----------|------------|------------|------------------------|
| 26-Nov-2007                                                                                     | 1            | 2572.52 | -1415.72  | 0.9951    | 5          | 5000       | 1                      |
| Mean                                                                                            |              | 2572.52 | -1415.72  | 0.9951    |            |            |                        |
| S.D.                                                                                            |              |         |           |           |            |            |                        |
| %CV                                                                                             |              |         |           |           |            |            |                        |
| n                                                                                               |              | 1       | 1         | 1         |            |            |                        |
| Regression Footnote(s):<br>1) Resp. = Slope * Conc. + Intercept; no Internal Standard was used. |              |         |           |           |            |            |                        |

**Table 9.** Calibration Curve Parameters for Fexinidazole Sulphone Calibration Standards in Mouse Plasma for Study Protocol 0403-2007.

| Run Date                                                                                                                                         | Curve Number | A            | B         | C            | R-Squared | LLOQ ng/mL | ULOQ ng/mL | Regression Footnote(s) |
|--------------------------------------------------------------------------------------------------------------------------------------------------|--------------|--------------|-----------|--------------|-----------|------------|------------|------------------------|
| 26-Feb-2008                                                                                                                                      | 3            | -8.63999E-08 | 0.0045831 | -6.37679E-05 | 0.9968    | 25         | 25000      | 1                      |
| Mean                                                                                                                                             |              | -8.63999E-08 | 0.0045831 | -6.37679E-05 | 0.9968    |            |            |                        |
| S.D.                                                                                                                                             |              |              |           |              |           |            |            |                        |
| %CV                                                                                                                                              |              |              |           |              |           |            |            |                        |
| n                                                                                                                                                |              | 1            | 1         | 1            | 1         |            |            |                        |
| Regression Footnote(s):<br>1) Resp. = A * (Conc.**2) + B * Conc. + C; [ <sup>2</sup> H <sub>3</sub> ]Fexinidazole as Internal Standard was used. |              |              |           |              |           |            |            |                        |

**Table 10.** Individual and mean ( $\pm$ SD, %CV) plasma concentrations ( $\mu\text{g/mL}$ ) of sulphone metabolites of Fexinidazole after repeated oral administration at the nominal dose of Fexinidazole of 200 mg/kg to male NMRI mice.

| Time Hours | Mouse 4 | Mouse 5 | Mouse 6 | Mean | S.D. | %CV   |
|------------|---------|---------|---------|------|------|-------|
| 0.25       | 42.3    | 4.19    | 6.35    | 17.6 | 21.4 | 121.6 |
| 0.5        | 42.3    | 8.25    | 11.6    | 20.7 | 18.8 | 90.8  |
| 1          | 47.9    | 24.8    | 38.8    | 37.2 | 11.6 | 31.2  |
| 3          | 84.9    | 81.5    | 66.5    | 77.6 | 9.79 | 12.6  |
| 8          | 76.1    | 61.1    | 65.4    | 67.5 | 7.72 | 11.4  |
| 24         | 0.371   | 4.26    | 0.273   | 1.63 | 2.27 | 139.3 |

**Table 11.** Individual and mean ( $\pm$ SD, %CV) plasma concentrations ( $\mu\text{g/mL}$ ) of sulfoxide metabolites of Fexinidazole after repeated oral administration at the nominal dose of Fexinidazole of 200 mg/kg to male NMRI mice.

| Time Hours | Mouse 4 | Mouse 5 | Mouse 6 | Mean  | S.D.  | %CV   |
|------------|---------|---------|---------|-------|-------|-------|
| 0.25       | 16.8    | 17.0    | 31.0    | 21.6  | 8.14  | 37.7  |
| 0.5        | 19.1    | 21.7    | 39.4    | 26.7  | 11.0  | 41.2  |
| 1          | 26.7    | 34.8    | 33.4    | 31.6  | 4.33  | 13.7  |
| 3          | 13.4    | 20.0    | 13.8    | 15.7  | 3.70  | 23.6  |
| 8          | 11.1    | 3.20    | 8.05    | 7.45  | 3.98  | 53.4  |
| 24         | BLQ     | 0.799   | 0.0149  | 0.271 | 0.457 | 168.6 |

**Table 12.** Individual and mean ( $\pm$ SD, %CV) pharmacokinetic parameters of sulphone metabolite of Fexinidazole after repeated oral 200 mg/kg/day of Fexinidazole in male NMRI mice.

| Parameter                                   | Units       | Mouse<br>4      | Mouse<br>5      | Mouse<br>6      | Mean  | S.D.   | %CV  |
|---------------------------------------------|-------------|-----------------|-----------------|-----------------|-------|--------|------|
| Original Dose                               | mg/kg/day   | 192             | 192             | 192             |       |        |      |
| C <sub>max</sub>                            | µg/mL       | 84.9            | 81.5            | 66.5            | 77.6  | 9.79   | 12.6 |
| T <sub>max</sub>                            | Hours       | 3               | 3               | 3               | 3     |        |      |
| AUC <sub>0-tlast</sub><br>Interval          |             | (0-24<br>Hours) | (0-24<br>Hours) | (0-24<br>Hours) |       |        |      |
| AUC <sub>0-tlast</sub>                      | µg*Hours/mL | 1190            | 996             | 976             | 1050  | 118    | 11.2 |
| AUC <sub>0-∞</sub>                          | µg*Hours/mL | 1190            | 1020            | 977             | 1060  | 113    | 10.6 |
| t <sub>1/2,z</sub>                          | Hours       | 2.08            | 4.16            | 2.02            | 2.75  | 1.22   | 44.3 |
| Regression Points                           | Hours       | 8, 24           | 8, 24           | 8, 24           |       |        |      |
| C <sub>max</sub> /Dose                      | µg/mL       | 0.441           | 0.425           | 0.346           | 0.404 | 0.0509 | 12.6 |
| AUC <sub>0-tlast</sub> /Dose                | µg*Hours/mL | 6.16            | 5.19            | 5.07            | 5.47  | 0.598  | 10.9 |
| AUC <sub>0-∞</sub> /Dose                    | µg*Hours/mL | 6.19            | 5.32            | 5.08            | 5.53  | 0.584  | 10.6 |
| C <sub>max</sub><br>metabolite/parent       |             | 267             | 207             | 101             | 191.8 | 84.3   | 43.9 |
| AUC <sub>0-tlast</sub><br>metabolite/parent |             | 909             | 731             | 507             | 716   | 201    | 28.1 |

**Table 13.** Individual and mean ( $\pm$ SD, %CV) pharmacokinetic parameters of sulphoxide metabolite of Fexinidazole after repeated oral 200 mg/kg/day of Fexinidazole in male NMRI mice.

| Parameter                                   | Units       | Mouse<br>4     | Mouse<br>5      | Mouse<br>6      | Mean  | S.D.   | %CV  |
|---------------------------------------------|-------------|----------------|-----------------|-----------------|-------|--------|------|
| Original Dose                               | mg/kg/day   | 192.38         | 191.8           | 192.38          |       |        |      |
| C <sub>max</sub>                            | µg/mL       | 26.7           | 34.8            | 39.4            | 33.6  | 6.43   | 19.1 |
| T <sub>max</sub>                            | Hours       | 1              | 1               | 0.5             | 0.833 | 0.289  | 34.6 |
| AUC <sub>0-tlast</sub><br>Interval          |             | (0-8<br>Hours) | (0-24<br>Hours) | (0-24<br>Hours) |       |        |      |
| AUC <sub>0-tlast</sub>                      | µg*Hours/mL | 119            | 166             | 197             | 161   | 39.3   | 24.4 |
| AUC <sub>0-∞</sub>                          | µg*Hours/mL | 222            | 171             | 197             | 197   | 25.5   | 13.0 |
| t <sub>1/2,z</sub>                          | Hours       | 6.39           | 4.44            | 2.09            | 4.31  | 2.15   | 50.0 |
| Regression Points                           | Hours       | 1-8            | 1-24            | 0.5-24          |       |        |      |
| C <sub>max</sub> /Dose                      | µg/mL       | 0.139          | 0.181           | 0.205           | 0.175 | 0.0334 | 19.1 |
| AUC <sub>0-tlast</sub> /Dose                | µg*Hours/mL | 0.621          | 0.865           | 1.03            | 0.839 | 0.206  | 24.5 |
| AUC <sub>0-∞</sub> /Dose                    | µg*Hours/mL | 1.15           | 0.892           | 1.02            | 1.02  | 0.129  | 12.6 |
| C <sub>max</sub><br>metabolite/parent       |             | 84.2           | 88.3            | 59.8            | 77.4  | 15.4   | 19.9 |
| AUC <sub>0-tlast</sub><br>metabolite/parent |             | 91.6           | 121.8           | 103.0           | 105.5 | 15.3   | 14.5 |

**Figure 1:** Day 5 Individual plasma concentration ( $\mu\text{g/mL}$ ) of Fexinidazole Sulphone after 5-day repeated Oral administration of Fexinidazole to male NMRI Mice (Lin-Lin scale)

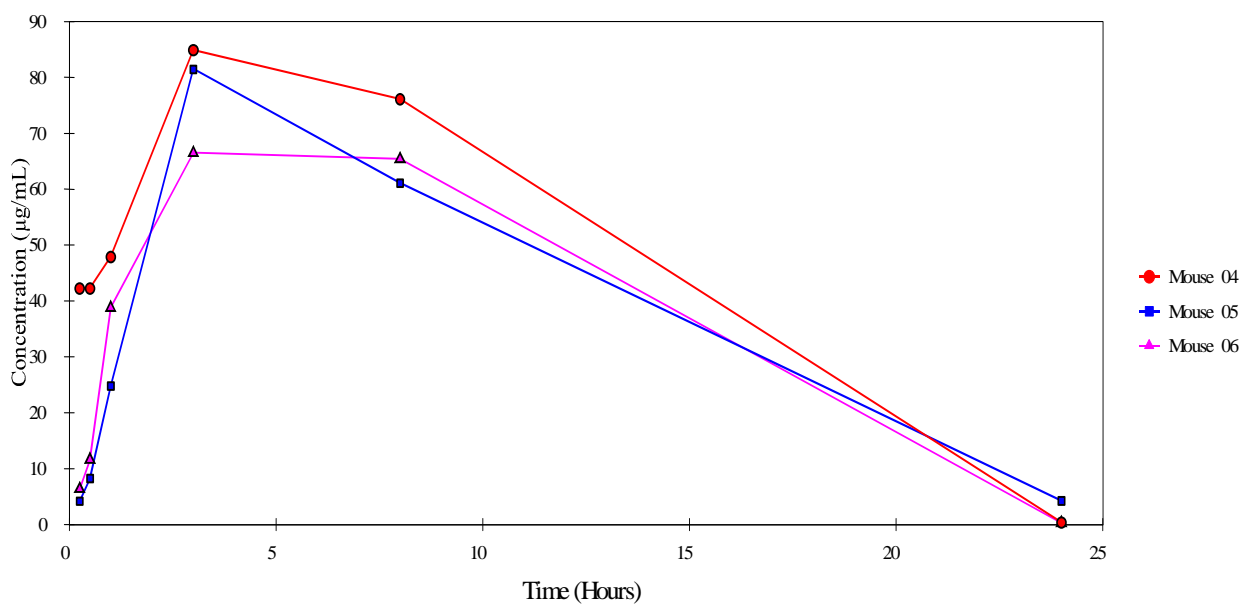

**Figure 2:** Day 5 Individual plasma concentration ( $\mu\text{g/mL}$ ) of Fexinidazole Sulphone after 5-day repeated Oral administration of Fexinidazole to male NMRI Mice (Log-Lin scale)

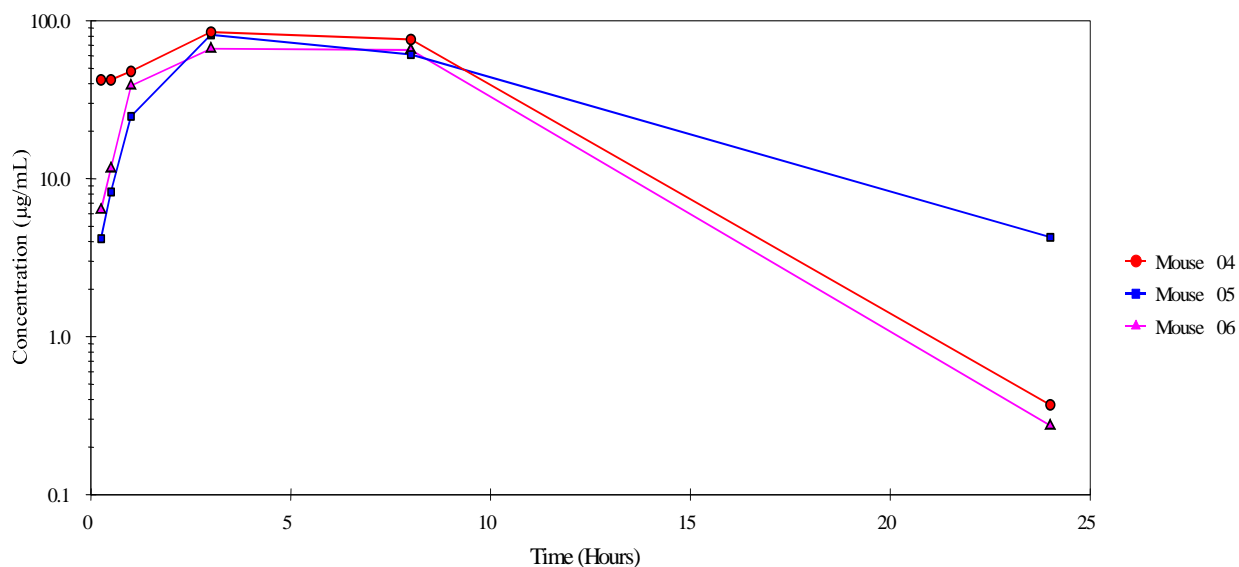

**Figure 3:** Day 5 Individual plasma concentration ( $\mu\text{g/mL}$ ) of Fexinidazole Sulphoxide after 5-day repeated Oral administration of Fexinidazole to male NMRI Mice (Lin-Lin scale)

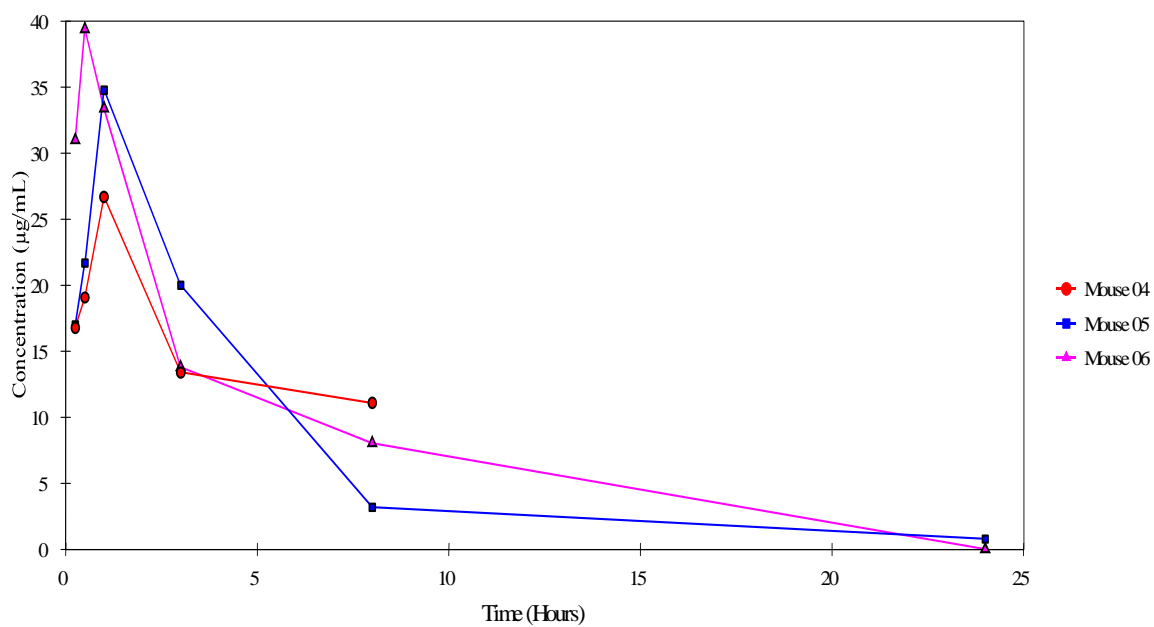

**Figure 4:** Day 5 Individual plasma concentration ( $\mu\text{g/mL}$ ) of Fexinidazole Sulphoxide after 5-day repeated Oral administration of Fexinidazole to male NMRI Mice (Log-Lin scale)

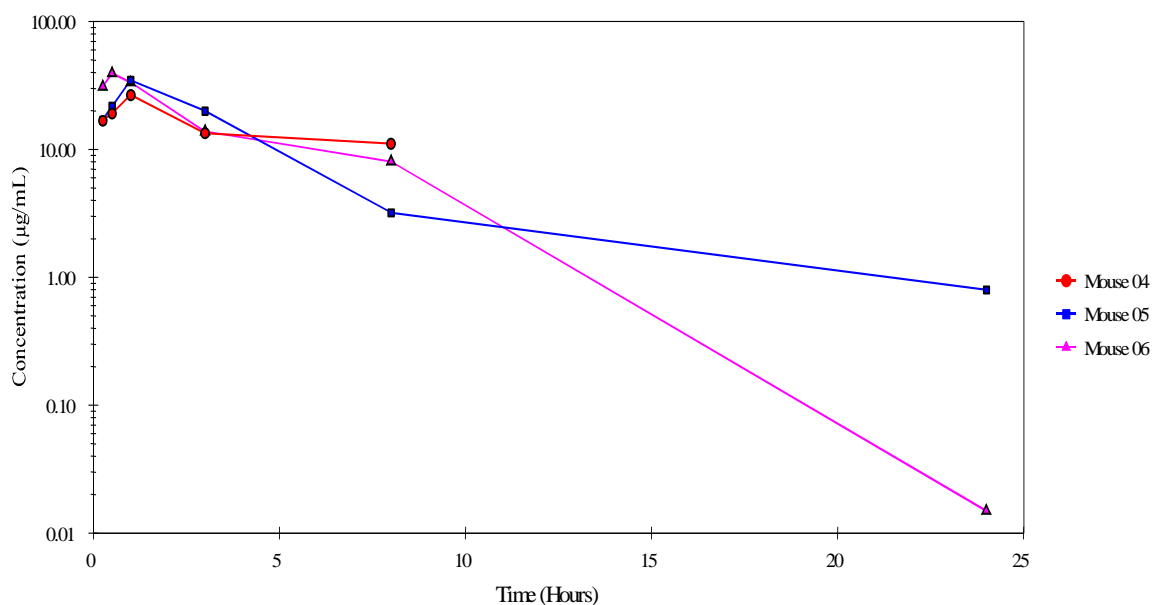

**Figure 5.** Mean ( $\pm$ SD) plasma concentrations (ng/mL) of Fexinidazole and its sulphone and sulfoxide metabolites after 5-day repeated oral administration of 200 mg/kg of Fexinidazole to male NMRI mice.

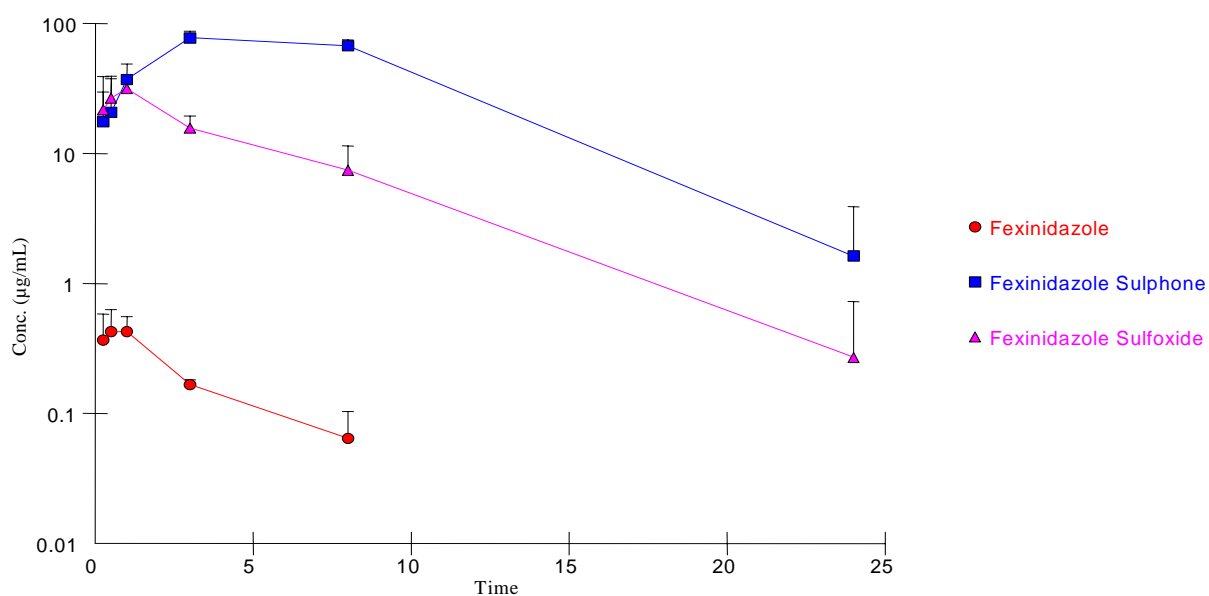

Supplement: Dataset S9 — (0.43 MB PDF) [file pntd.0000923.s010.pdf]
