# Supplementary material for: Fexinidazole – A New Oral Nitroimidazole Drug Candidate Entering Clinical Development for the Treatment of Sleeping Sickness
Source: PLoS Negl Trop Dis. 2010 Dec 21;4(12):e923. doi: 10.1371/journal.pntd.0000923 (PMC3006138; doi:10.1371/journal.pntd.0000923)

# Final Summary Report

|                                |                                                                                                       |
|--------------------------------|-------------------------------------------------------------------------------------------------------|
| Study Title                    | Fexinidazole Reverse mutation in four histidine-requiring strains of <i>Salmonella typhimurium</i>    |
| Author                         |                                                                                                       |
| Sponsor                        | Drugs for Neglected Diseases Initiative (DNDi)<br>1 place Saint Gervais<br>1201 Geneva<br>Switzerland |
| Study Monitor                  |                                                                                                       |
| Test Facility                  | Covance Laboratories Ltd                                                                              |
| Covance Study Number           | 2647/3                                                                                                |
| Covance Master Protocol Number | 2647 MPR Ames (Version 1, January 2006)                                                               |
| Report Issued                  | February 2009                                                                                         |
| Page Number                    | 1 of 18                                                                                               |

|                             |                                                                                                                                                                                                                                                                                                                                                                                                                                |
|-----------------------------|--------------------------------------------------------------------------------------------------------------------------------------------------------------------------------------------------------------------------------------------------------------------------------------------------------------------------------------------------------------------------------------------------------------------------------|
| <b>COMPOUND</b>             | Fexinidazole                                                                                                                                                                                                                                                                                                                                                                                                                   |
| <b>SOLVENT</b>              | Sterile anhydrous analytical grade dimethyl sulphoxide (DMSO)                                                                                                                                                                                                                                                                                                                                                                  |
| <b>CONCENTRATION LEVELS</b> | 0.8, 4, 20, 100, 350, 1000 and 5000 µg/plate.                                                                                                                                                                                                                                                                                                                                                                                  |
| <b>STRAINS TESTED</b>       | <i>Salmonella typhimurium</i> TA98, TA98NR, TA100 and TA100NR                                                                                                                                                                                                                                                                                                                                                                  |
| <b>METHODOLOGY</b>          | All experimentation was performed according to the protocol, with treatments of all the tester strains being performed both in the absence and in the presence of a rat liver metabolic activation system (Aroclor 1254 induced S-9) at the concentrations specified above.                                                                                                                                                    |
| <b>RESULTS</b>              |                                                                                                                                                                                                                                                                                                                                                                                                                                |
| <b>Precipitation</b>        | Precipitation of the test article was observed at the highest two concentrations tested in the absence and presence of S-9.                                                                                                                                                                                                                                                                                                    |
| <b>Toxicity</b>             | Evidence of toxicity in the form of a slight thinning of the background bacterial lawn or a complete killing of the test bacteria was observed in strains TA98, TA98NR and TA100 following treatments at the highest two or three concentrations tested in the presence of S-9. A tailing off of the mutagenic response at 5000 µg/plate in strains TA98 and TA100NR in the absence of S-9 may also be indicative of toxicity. |

## **MUTAGENICITY**

Statistically significant, dose related increases in revertant numbers were observed following Fexinidazole treatments of all of the tester strains both in the absence and presence of S-9 (with the exception of strain TA98NR in the absence of S-9) when the data were analysed at the 1% level using Dunnett's test. Although significant increases in revertant numbers were observed following most treatments of strains TA98NR and TA100NR, the magnitude of these effects was substantially reduced in comparison to the respective parent strains. Treatments in the presence of S-9 increased mutagenicity and potency in all strains tested although this effect was more apparent in strains TA98NR and TA100NR. This may indicate that metabolites of different mutational specificity to the parent compound may be formed.

This screening study was considered to have provided evidence of Fexinidazole mutagenic activity in this assay system. This mutagenic activity can be attributed, at least in part, to bacterial nitroreductase enzymes.

**Lowest detectable concentration**

The lowest concentrations of Fexinidazole to give a statistically significant result when the data were analysed at the 1% level using Dunnett's test for each strain are as follows:

|              |                |
|--------------|----------------|
| TA98 –S-9    | 350 µg/plate   |
| TA98NR –S-9  | Not applicable |
| TA98 +S-9    | 100 µg/plate   |
| TA98NR+S-9   | 1000 µg/plate  |
| TA100 –S-9   | 4 µg/plate     |
| TA100NR –S-9 | 350 µg/plate   |
| TA100 +S-9   | 4 µg/plate     |
| TA100NR +S-9 | 100 µg/plate   |

**CONCLUSION**

It was concluded that Fexinidazole did induce mutation in *Salmonella typhimurium* strains TA98, TA100, and TA100NR in the absence and presence of S-9 and in strain TA98NR in the presence of S-9 only, when tested under the conditions employed in this screening study. These conditions included treatment at concentrations up to 5000 µg/plate, in the absence and presence of a rat liver metabolic activation system (S-9). This mutagenic activity was attributed, at least in part, to bacterial nitroreductase enzymes.

**COMMENTS**

Following treatments of strain TA100 at 1000 and 5000 µg/plate in the absence of S-9, the nature of the precipitation, along with the large number of colonies made it impossible to obtain accurate revertant counts from these plates. Therefore no counts are reported for these concentrations of TA100 in the absence of S-9 in the data tables.

## MUTATION EXPERIMENT RESULTS

### Fexinidazole: summary of mean revertant colonies (-S-9) - Experiment 1

| Substance                                                   | Dose Level<br>µg/plate | TA98                | TA98NR            | TA100            | TA100NR             |
|-------------------------------------------------------------|------------------------|---------------------|-------------------|------------------|---------------------|
|                                                             |                        | Mean ± SD           | Mean ± SD         | Mean ± SD        | Mean ± SD           |
| DMSO                                                        | 100 µl                 | 24 ± 6              | 22 ± 6            | 90 ± 5           | 100 ± 7             |
| Fexinidazole                                                | 0.8                    | 29 ± 3              | 23 ± 3            | 106 ± 8          | 107 ± 20            |
|                                                             | 4                      | 25 ± 4              | 19 ± 6            | 169 ± 30         | 111 ± 30            |
|                                                             | 20                     | 26 ± 8              | 22 ± 6            | 364 ± 14         | 107 ± 23            |
|                                                             | 100                    | 47 ± 13             | 19 ± 2            | 1339 ± 77        | 131 ± 26            |
|                                                             | 350                    | 167 ± 8             | 23 ± 8            | 2250 ± 84        | 165 ± 12            |
|                                                             | 1000                   | 158 ± 85<br>(Ppn+M) | 18 ± 4<br>(Ppn+M) | -<br>(Ppn + X)   | 162 ± 8<br>(Ppn+M)  |
|                                                             | 5000                   | 98 ± 4<br>(Ppn+M)   | 19 ± 3<br>(Ppn+M) | -<br>(Ppn + X)   | 116 ± 21<br>(Ppn+M) |
| Positive controls                                           | Compound               | NQO                 | NQO               | NaN <sub>3</sub> | NaN <sub>3</sub>    |
|                                                             | Dose Level             | 1 µg                | 1 µg              | 2 µg             | 2 µg                |
|                                                             | Mean ± SD              | 494 ± 29            | 355 ± 23          | 1107 ± 129       | 885 ± 57            |
| Controls confirming nitroreductase proficiency / deficiency | Compound               | 2NF                 | 2NF               | NFZ              | NFZ                 |
|                                                             | Dose Level             | 5 µg                | 5 µg              | 2 µg             | 2 µg                |
|                                                             | Mean ± SD              | 1095 ± 64           | 161 ± 14          | 859 ± 34         | 183 ± 17            |

SD Standard deviation  
 2NF 2-Nitrofluorene  
 NaN<sub>3</sub> Sodium azide  
 M : Plate counted manually  
 X : Too many colonies. Unable to determine accurate counts due to level and nature of precipitation.

NQO 4-Nitroquinoline 1-oxide  
 NFZ Nitrofurazone  
 Ppn : Precipitation of test article observed

**Fexinidazole: summary of mean revertant colonies (+S-9) - Experiment 1**

| Substance         | Dose Level<br>µg/plate | TA98         | TA98NR               | TA100        | TA100NR             |
|-------------------|------------------------|--------------|----------------------|--------------|---------------------|
|                   |                        | Mean ± SD    | Mean ± SD            | Mean ± SD    | Mean ± SD           |
| DMSO              | 100 µl                 | 45 ± 4       | 19 ± 5               | 177 ± 6      | 154 ± 14            |
| Fexinidazole      | 0.8                    | 43 ± 10      | 18 ± 1               | 207 ± 3      | 124 ± 11            |
|                   | 4                      | 66 ± 6       | 21 ± 8               | 403 ± 9      | 141 ± 5             |
|                   | 20                     | 91 ± 16      | 25 ± 10              | 1392 ± 127   | 178 ± 20            |
|                   | 100                    | 517 ± 77     | 25 ± 6               | 2586 ± 62    | 309 ± 11            |
|                   | 350                    | 284 ± 140    | 27 ± 2               | -<br>(T)     | 549 ± 21            |
|                   | 1000                   | -<br>(T+Ppn) | 47 ± 4<br>(Ppn+M+S)  | -<br>(T+Ppn) | 533 ± 8<br>(Ppn+M)  |
|                   | 5000                   | -<br>(T+Ppn) | 33 ± 10<br>(Ppn+M+S) | -<br>(Ppn+T) | 379 ± 45<br>(Ppn+M) |
| Positive controls | Compound               | B[a]P        | B[a]P                | AAN          | AAN                 |
|                   | Dose Level             | 10 µg        | 10 µg                | 5 µg         | 5 µg                |
|                   | Mean ± SD              | 573 ± 69     | 214 ± 10             | 2573 ± 85    | 2290 ± 192          |

SD Standard deviation

B[a]P Benzo[a]pyrene  
AAN 2-Aminoanthracene

S : Slight thinning of background bacterial lawn  
Ppn : Precipitation of test article observed  
T : Toxic, no revertant colonies  
M : Plate counted manually

Fexinidazole Experiment 1

Table 1

Test strain: TA98 -S-9

| Treatment (µg/plate) | Revertant numbers/plate |       |      |       |     |       |
|----------------------|-------------------------|-------|------|-------|-----|-------|
| Solvent              | 16                      | 30    | 19   | 24    | 30  |       |
| 0.8                  | 33                      | 27    | 28   |       |     |       |
| 4                    | 23                      | 23    | 30   |       |     |       |
| 20                   | 17                      | 30    | 31   |       |     |       |
| 100                  | 36                      | 61    | 43   |       |     |       |
| 350                  | 174                     | 170   | 158  |       |     |       |
| 1000                 | 126                     | Ppn+M | 94   | Ppn+M | 255 | Ppn+M |
| 5000                 | 98                      | Ppn+M | 94   | Ppn+M | 101 | Ppn+M |
| Positive             | 1051                    | 1065  | 1169 |       |     |       |

| Treatment (µg/plate) | Mean (of) | N | Fold Increase | Standard Deviation | Correlation Coefficient | Slope of best fit | Dunnett's t value |
|----------------------|-----------|---|---------------|--------------------|-------------------------|-------------------|-------------------|
| Solvent              | 23.80     | 5 |               | 6.34               |                         |                   |                   |
| 0.8                  | 29.33     | 3 | 1.23          | 3.21               | 0.49 NS                 | 6.92              | 0.64 NS           |
| 4                    | 25.33     | 3 | 1.06          | 4.04               | 0.04 NS                 | 0.13              | 0.20 NS           |
| 20                   | 26.00     | 3 | 1.09          | 7.81               | 0.03 NS                 | 0.02              | 0.24 NS           |
| 100                  | 46.67     | 3 | 1.96          | 12.90              | 0.76 ***                | 0.21              | 2.18 NS           |
| 350                  | 167.33    | 3 | 7.03^         | 8.33               | 0.98 ***                | 0.40              | 9.06 ***          |
| 1000                 | 158.33    | 3 | 6.65          | 85.23              | 0.78 ***                | 0.15              | 8.34 ***          |
| 5000                 | 97.67     | 3 | 4.10          | 3.51               | 0.32 NS                 | 0.01              | 5.64 ***          |
| Positive             | 1095.00   | 3 | 46.01         | 64.47              |                         |                   |                   |
| M Statistic = 6.301  |           |   |               |                    |                         |                   |                   |

Key to significance:

\*  $p \leq 0.05$       \*\*  $p \leq 0.01$       \*\*\*  $p \leq 0.005$       NS not significant

Key to postfixes:

Ppn : Precipitation of test article observed

M : Plate counted manually

^ : Maximum increase above control

Fexinidazole Experiment 1

Table 2

Test strain: TA98 +S-9

| Treatment (µg/plate) | Revertant numbers/plate |       |       |    |    |
|----------------------|-------------------------|-------|-------|----|----|
| Solvent              | 42                      | 50    | 50    | 44 | 41 |
| 0.8                  | 54                      | 42    | 34    |    |    |
| 4                    | 68                      | 71    | 59    |    |    |
| 20                   | 105                     | 74    | 94    |    |    |
| 100                  | 433                     | 534   | 584   |    |    |
| 350                  | 332                     | 394   | 127   |    |    |
| 1000                 | T+Ppn                   | T+Ppn | T+Ppn |    |    |
| 5000                 | T+Ppn                   | T+Ppn | T+Ppn |    |    |
| Positive             | 651                     | 546   | 522   |    |    |

| Treatment (µg/plate) | Mean (of)            | N | Fold Increase | Standard Deviation | Correlation Coefficient | Slope of best fit | Dunnett's t value |
|----------------------|----------------------|---|---------------|--------------------|-------------------------|-------------------|-------------------|
| Solvent              | 45.40                | 5 |               | 4.34               |                         |                   |                   |
| 0.8                  | 43.33                | 3 | 0.95          | 10.07              | 0.17 NS                 | -2.58             | -0.13 NS          |
| 4                    | 66.00                | 3 | 1.45          | 6.24               | 0.82 ***                | 5.45              | 1.00 NS           |
| 20                   | 91.00                | 3 | 2.00          | 15.72              | 0.88 ***                | 2.29              | 2.00 NS           |
| 100                  | 517.00               | 3 | 11.39^        | 76.92              | 0.98 ***                | 4.74              | 11.49 ***         |
| 350                  | 284.33               | 3 | 6.26          | 139.74             | 0.53 **                 | 0.77              | 6.99 ***          |
| Positive             | 573.00               | 3 | 12.62         | 68.61              |                         |                   |                   |
|                      | M Statistic = 12.370 |   |               |                    |                         |                   |                   |

Key to significance:

\*  $p \leq 0.05$       \*\*  $p \leq 0.01$       \*\*\*  $p \leq 0.005$       NS not significant

Key to postfixes:

Ppn : Precipitation of test article observed

T : Toxic, no revertant colonies

^ : Maximum increase above control

Fexinidazole Experiment 1

Table 3

Test strain: TA98NR -S-9

| Treatment (µg/plate) | Revertant numbers/plate |       |     |       |    |       |
|----------------------|-------------------------|-------|-----|-------|----|-------|
| Solvent              | 24                      | 20    | 23  | 12    | 29 |       |
| 0.8                  | 25                      | 24    | 19  |       |    |       |
| 4                    | 21                      | 12    | 23  |       |    |       |
| 20                   | 28                      | 20    | 17  |       |    |       |
| 100                  | 21                      | 18    | 17  |       |    |       |
| 350                  | 22                      | 31    | 16  |       |    |       |
| 1000                 | 13                      | Ppn+M | 21  | Ppn+M | 20 | Ppn+M |
| 5000                 | 19                      | Ppn+M | 16  | Ppn+M | 22 | Ppn+M |
| Positive             | 147                     | 174   | 163 |       |    |       |

| Treatment (µg/plate) | Mean (of) | N | Fold Increase | Standard Deviation | Correlation Coefficient | Slope of best fit | Dunnett's t value |
|----------------------|-----------|---|---------------|--------------------|-------------------------|-------------------|-------------------|
| Solvent              | 21.60     | 5 |               | 6.27               |                         |                   |                   |
| 0.8                  | 22.67     | 3 | 1.05          | 3.21               | 0.11 NS                 | 1.33              | 0.35 NS           |
| 4                    | 18.67     | 3 | 0.86          | 5.86               | 0.27 NS                 | -0.81             | -0.75 NS          |
| 20                   | 21.67     | 3 | 1.00          | 5.69               | 0.00 NS                 | 0.00              | 0.06 NS           |
| 100                  | 18.67     | 3 | 0.86          | 2.08               | 0.21 NS                 | -0.03             | -0.67 NS          |
| 350                  | 23.00     | 3 | 1.06^         | 7.55               | 0.11 NS                 | 0.00              | 0.35 NS           |
| 1000                 | 18.00     | 3 | 0.83          | 4.36               | 0.17 NS                 | -0.00             | -0.89 NS          |
| 5000                 | 19.00     | 3 | 0.88          | 3.00               | 0.14 NS                 | -0.00             | -0.59 NS          |
| Positive             | 161.33    | 3 | 7.47          | 13.58              |                         |                   |                   |
| M Statistic = 1.296  |           |   |               |                    |                         |                   |                   |

Key to significance:

\*  $p \leq 0.05$       \*\*  $p \leq 0.01$       \*\*\*  $p \leq 0.005$       NS not significant

Key to postfixes:

Ppn : Precipitation of test article observed

M : Plate counted manually

^ : Maximum increase above control

Fexinidazole Experiment 1

Table 4

Test strain: TA98NR +S-9

| Treatment (µg/plate) | Revertant numbers/plate |            |            |    |    |
|----------------------|-------------------------|------------|------------|----|----|
| Solvent              | 25                      | 20         | 22         | 17 | 13 |
| 0.8                  | 19                      | 18         | 17         |    |    |
| 4                    | 28                      | 12         | 23         |    |    |
| 20                   | 16                      | 35         | 23         |    |    |
| 100                  | 32                      | 21         | 23         |    |    |
| 350                  | 29                      | 25         | 28         |    |    |
| 1000                 | 43 Ppn+M+S              | 47 Ppn+M+S | 50 Ppn+M+S |    |    |
| 5000                 | 34 Ppn+M+S              | 43 Ppn+M+S | 23 Ppn+M+S |    |    |
| Positive             | 204                     | 214        | 223        |    |    |

| Treatment (µg/plate) | Mean (of) | N | Fold Increase | Standard Deviation | Correlation Coefficient | Slope of best fit | Dunnett's t value |
|----------------------|-----------|---|---------------|--------------------|-------------------------|-------------------|-------------------|
| Solvent              | 19.40     | 5 |               | 4.62               |                         |                   |                   |
| 0.8                  | 18.00     | 3 | 0.93          | 1.00               | 0.20 NS                 | -1.75             | -0.29 NS          |
| 4                    | 21.00     | 3 | 1.08          | 8.19               | 0.18 NS                 | 0.48              | 0.30 NS           |
| 20                   | 24.67     | 3 | 1.27          | 9.61               | 0.38 NS                 | 0.29              | 1.13 NS           |
| 100                  | 25.33     | 3 | 1.31          | 5.86               | 0.36 NS                 | 0.06              | 1.37 NS           |
| 350                  | 27.33     | 3 | 1.41          | 2.08               | 0.44 *                  | 0.02              | 1.83 NS           |
| 1000                 | 46.67     | 3 | 2.41^         | 3.51               | 0.86 ***                | 0.03              | 5.29 ***          |
| 5000                 | 33.33     | 3 | 1.72          | 10.02              | 0.40 *                  | 0.00              | 2.91 *            |
| Positive             | 213.67    | 3 | 11.01         | 9.50               |                         |                   |                   |
| M Statistic = 1.553  |           |   |               |                    |                         |                   |                   |

Key to significance:

\*  $p \leq 0.05$       \*\*  $p \leq 0.01$       \*\*\*  $p \leq 0.005$       NS not significant

Key to postfixes:

S : Slight thinning of background bacterial lawn  
Ppn : Precipitation of test article observed  
M : Plate counted manually  
^ : Maximum increase above control

Fexinidazole Experiment 1

Table 5

Test strain: TA100 -S-9

| Treatment (µg/plate) | Revertant numbers/plate |       |       |    |    |
|----------------------|-------------------------|-------|-------|----|----|
| Solvent              | 92                      | 91    | 92    | 95 | 82 |
| 0.8                  | 112                     | 97    | 110   |    |    |
| 4                    | 204                     | 150   | 154   |    |    |
| 20                   | 370                     | 374   | 348   |    |    |
| 100                  | 1428                    | 1295  | 1295  |    |    |
| 350                  | 2312                    | 2283  | 2155  |    |    |
| 1000                 | X+Ppn                   | X+Ppn | X+Ppn |    |    |
| 5000                 | X+Ppn                   | X+Ppn | X+Ppn |    |    |
| Positive             | 1149                    | 962   | 1209  |    |    |

| Treatment (µg/plate) | Mean (of) | N | Fold Increase | Standard Deviation | Correlation Coefficient | Slope of best fit | Dunnett's t value |
|----------------------|-----------|---|---------------|--------------------|-------------------------|-------------------|-------------------|
| Solvent              | 90.40     | 5 |               | 4.93               |                         |                   |                   |
| 0.8                  | 106.33    | 3 | 1.18          | 8.14               | 0.82 **                 | 19.92             | 1.54 NS           |
| 4                    | 169.33    | 3 | 1.87          | 30.09              | 0.92 ***                | 19.73             | 6.65 ***          |
| 20                   | 364.00    | 3 | 4.03          | 14.00              | 0.99 ***                | 13.49             | 18.33 ***         |
| 100                  | 1339.33   | 3 | 14.82         | 76.79              | 1.00 ***                | 12.40             | 51.86 ***         |
| 350                  | 2250.00   | 3 | 24.89^        | 83.54              | 0.96 ***                | 6.23              | 72.62 ***         |
| Positive             | 1106.67   | 3 | 12.24         | 128.83             |                         |                   |                   |
| M Statistic = 2.079  |           |   |               |                    |                         |                   |                   |

Key to significance:

\*  $p \leq 0.05$       \*\*  $p \leq 0.01$       \*\*\*  $p \leq 0.005$       NS not significant

Key to postfixes:

Ppn : Precipitation of test article observed

X : Too many colonies. Unable to determine accurate counts due to level and nature of precipitation.

^ : Maximum increase above control

Fexinidazole Experiment 1

Table 6

Test strain: TA100 +S-9

| Treatment (µg/plate) | Revertant numbers/plate |       |       |     |     |
|----------------------|-------------------------|-------|-------|-----|-----|
| Solvent              | 170                     | 179   | 186   | 173 | 175 |
| 0.8                  | 203                     | 209   | 209   |     |     |
| 4                    | 396                     | 401   | 413   |     |     |
| 20                   | 1535                    | 1351  | 1291  |     |     |
| 100                  | 2515                    | 2626  | 2617  |     |     |
| 350                  | T                       | T     | T     |     |     |
| 1000                 | T+Ppn                   | T+Ppn | T+Ppn |     |     |
| 5000                 | Ppn+T                   | Ppn+T | Ppn+T |     |     |
| Positive             | 2476                    | 2633  | 2611  |     |     |

| Treatment (µg/plate) | Mean (of) | N | Fold Increase | Standard Deviation | Correlation Coefficient | Slope of best fit | Dunnett's t value |
|----------------------|-----------|---|---------------|--------------------|-------------------------|-------------------|-------------------|
| Solvent              | 176.60    | 5 |               | 6.19               |                         |                   |                   |
| 0.8                  | 207.00    | 3 | 1.17          | 3.46               | 0.95 ***                | 38.00             | 2.00 NS           |
| 4                    | 403.33    | 3 | 2.28          | 8.74               | 1.00 ***                | 57.42             | 12.38 ***         |
| 20                   | 1392.33   | 3 | 7.88          | 127.14             | 0.99 ***                | 61.15             | 43.72 ***         |
| 100                  | 2586.00   | 3 | 14.64^        | 61.65              | 0.95 ***                | 23.56             | 68.43 ***         |
| Positive             | 2573.33   | 3 | 14.57         | 85.01              |                         |                   |                   |
| M Statistic = 2.294  |           |   |               |                    |                         |                   |                   |

Key to significance:

\*  $p \leq 0.05$       \*\*  $p \leq 0.01$       \*\*\*  $p \leq 0.005$       NS not significant

Key to postfixes:

Ppn : Precipitation of test article observed

T : Toxic, no revertant colonies

^ : Maximum increase above control

Fexinidazole Experiment 1

Table 7

Test strain: TA100NR -S-9

| Treatment (µg/plate) | Revertant numbers/plate |       |     |       |     |       |
|----------------------|-------------------------|-------|-----|-------|-----|-------|
| Solvent              | 108                     | 91    | 100 | 95    | 104 |       |
| 0.8                  | 129                     | 89    | 103 |       |     |       |
| 4                    | 145                     | 103   | 86  |       |     |       |
| 20                   | 123                     | 118   | 81  |       |     |       |
| 100                  | 160                     | 111   | 121 |       |     |       |
| 350                  | 173                     | 172   | 151 |       |     |       |
| 1000                 | 154                     | Ppn+M | 163 | Ppn+M | 169 | Ppn+M |
| 5000                 | 128                     | Ppn+M | 92  | Ppn+M | 127 | Ppn+M |
| Positive             | 943                     | 883   | 830 |       |     |       |

| Treatment (µg/plate) | Mean (of) | N | Fold Increase | Standard Deviation | Correlation Coefficient | Slope of best fit | Dunnett's t value |
|----------------------|-----------|---|---------------|--------------------|-------------------------|-------------------|-------------------|
| Solvent              | 99.60     | 5 |               | 6.80               |                         |                   |                   |
| 0.8                  | 107.00    | 3 | 1.07          | 20.30              | 0.30 NS                 | 9.25              | 0.52 NS           |
| 4                    | 111.33    | 3 | 1.12          | 30.37              | 0.27 NS                 | 2.68              | 0.79 NS           |
| 20                   | 107.33    | 3 | 1.08          | 22.94              | 0.10 NS                 | 0.23              | 0.53 NS           |
| 100                  | 130.67    | 3 | 1.31          | 25.89              | 0.48 *                  | 0.27              | 2.20 NS           |
| 350                  | 165.33    | 3 | 1.66^         | 12.42              | 0.78 ***                | 0.18              | 4.46 ***          |
| 1000                 | 162.00    | 3 | 1.63          | 7.55               | 0.70 ***                | 0.06              | 4.26 ***          |
| 5000                 | 115.67    | 3 | 1.16          | 20.50              | 0.05 NS                 | 0.00              | 1.16 NS           |
| Positive             | 885.33    | 3 | 8.89          | 56.54              |                         |                   |                   |
| M Statistic = 3.113  |           |   |               |                    |                         |                   |                   |

Key to significance:

\*  $p \leq 0.05$       \*\*  $p \leq 0.01$       \*\*\*  $p \leq 0.005$       NS not significant

Key to postfixes:

Ppn : Precipitation of test article observed

M : Plate counted manually

^ : Maximum increase above control

Fexinidazole Experiment 1

Table 8

Test strain: TA100NR +S-9

| Treatment (µg/plate) | Revertant numbers/plate |           |           |     |     |
|----------------------|-------------------------|-----------|-----------|-----|-----|
| Solvent              | 145                     | 169       | 147       | 170 | 141 |
| 0.8                  | 120                     | 136       | 116       |     |     |
| 4                    | 145                     | 142       | 135       |     |     |
| 20                   | 155                     | 191       | 188       |     |     |
| 100                  | 300                     | 321       | 305       |     |     |
| 350                  | 567                     | 526       | 553       |     |     |
| 1000                 | 524 Ppn+M               | 536 Ppn+M | 540 Ppn+M |     |     |
| 5000                 | 340 Ppn+M               | 428 Ppn+M | 368 Ppn+M |     |     |
| Positive             | 2502                    | 2127      | 2242      |     |     |

| Treatment (µg/plate) | Mean (of) | N | Fold Increase | Standard Deviation | Correlation Coefficient | Slope of best fit | Dunnett's t value |
|----------------------|-----------|---|---------------|--------------------|-------------------------|-------------------|-------------------|
| Solvent              | 154.40    | 5 |               | 13.96              |                         |                   |                   |
| 0.8                  | 124.00    | 3 | 0.80          | 10.58              | 0.80 NS                 | -38.00            | -3.00 NS          |
| 4                    | 140.67    | 3 | 0.91          | 5.13               | 0.22 NS                 | -2.07             | -1.30 NS          |
| 20                   | 178.00    | 3 | 1.15          | 19.97              | 0.63 **                 | 1.76              | 2.12 NS           |
| 100                  | 308.67    | 3 | 2.00          | 10.97              | 0.97 ***                | 1.68              | 11.99 ***         |
| 350                  | 548.67    | 3 | 3.55^         | 20.84              | 0.99 ***                | 1.17              | 25.62 ***         |
| 1000                 | 533.33    | 3 | 3.45          | 8.33               | 0.83 ***                | 0.42              | 24.86 ***         |
| 5000                 | 378.67    | 3 | 2.45          | 44.96              | 0.37 *                  | 0.04              | 16.35 ***         |
| Positive             | 2290.33   | 3 | 14.83         | 192.12             |                         |                   |                   |
| M Statistic = 1.389  |           |   |               |                    |                         |                   |                   |

Key to significance:

\*  $p \leq 0.05$       \*\*  $p \leq 0.01$       \*\*\*  $p \leq 0.005$       NS not significant

Key to postfixes:

Ppn : Precipitation of test article observed

M : Plate counted manually

^ : Maximum increase above control

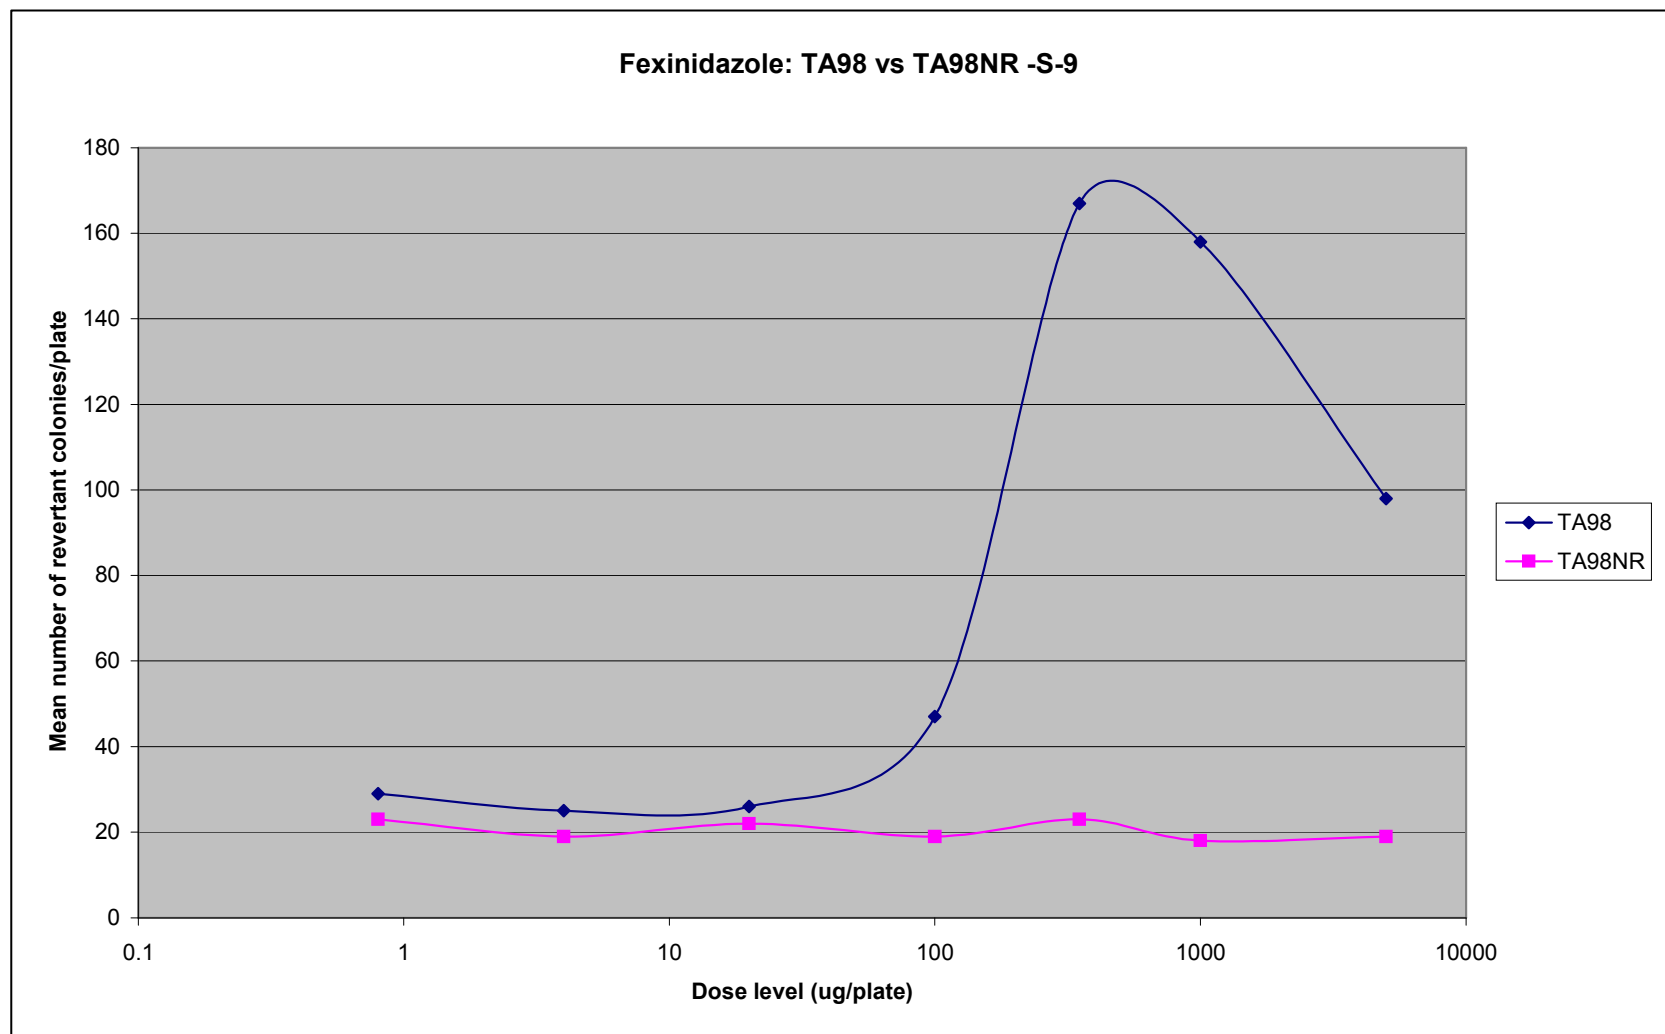

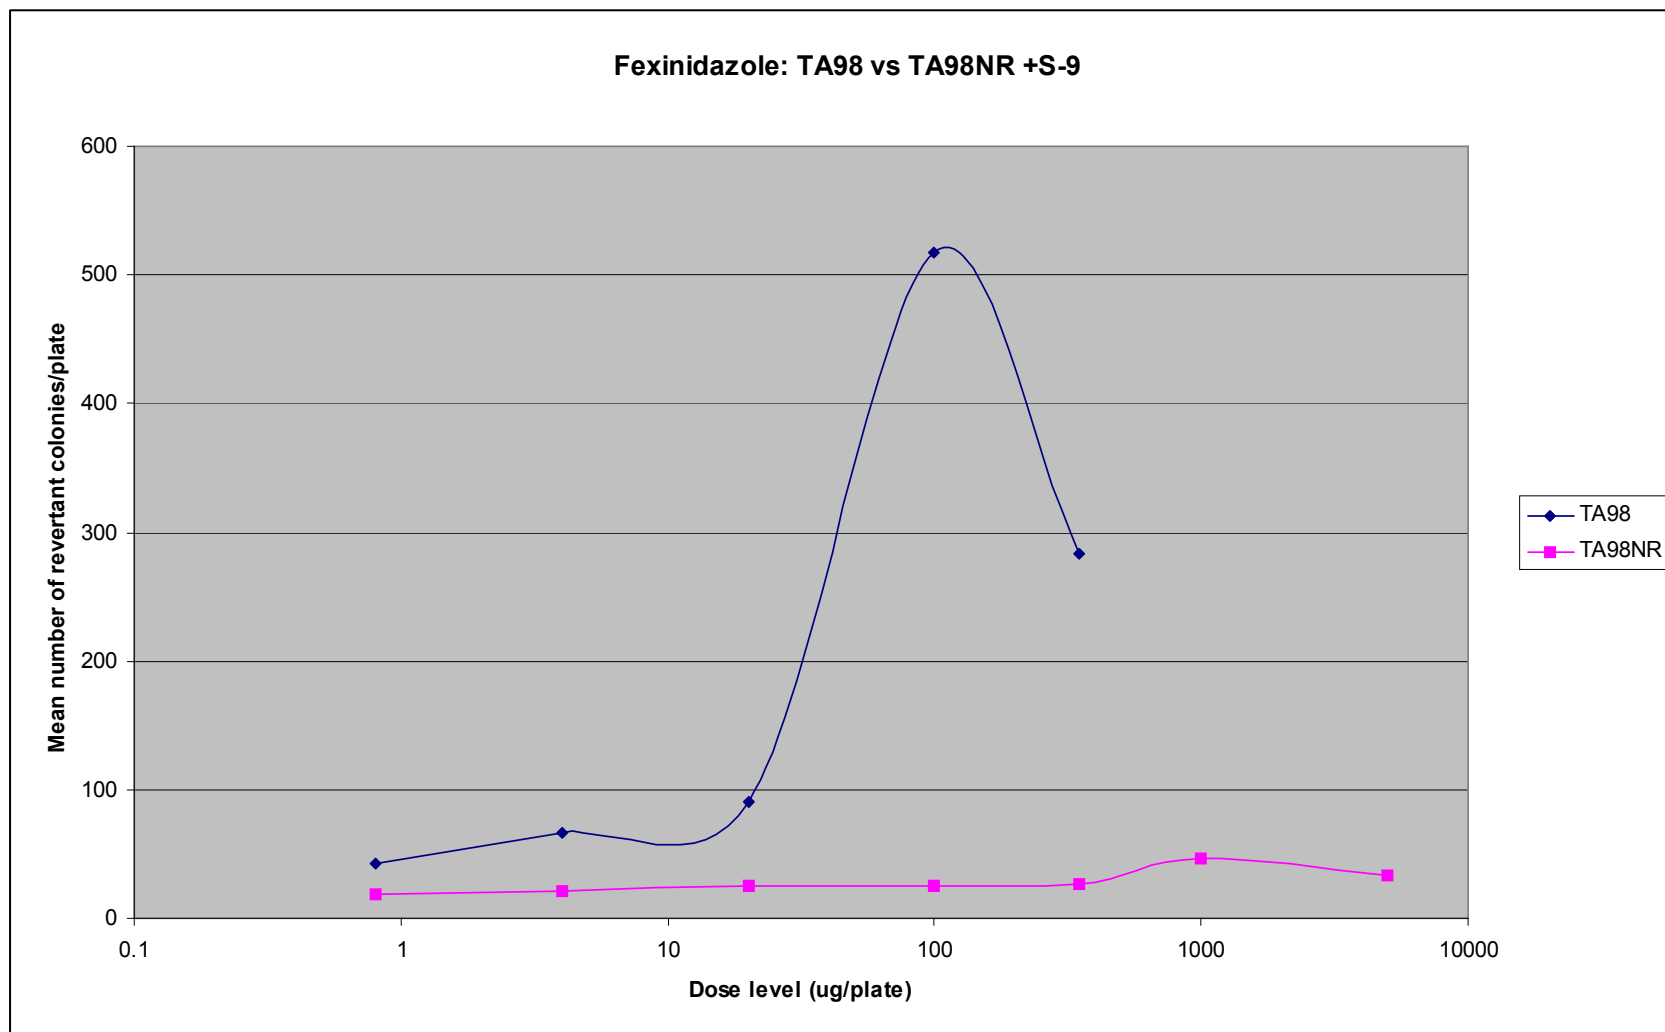

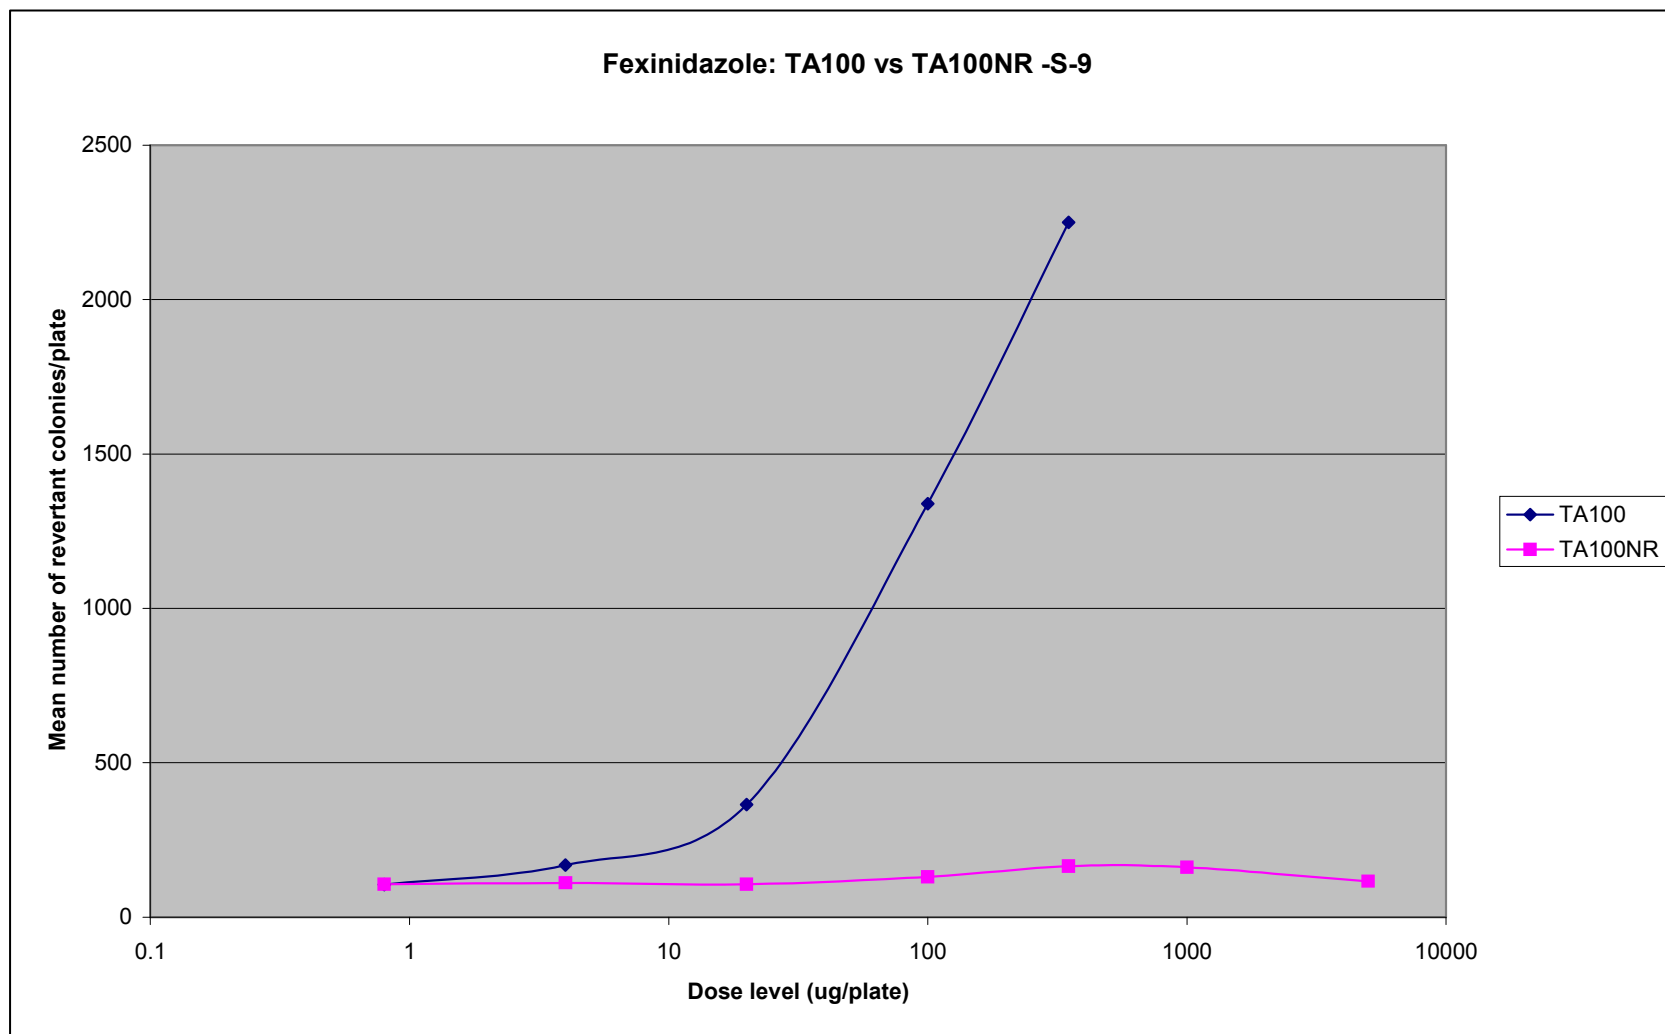

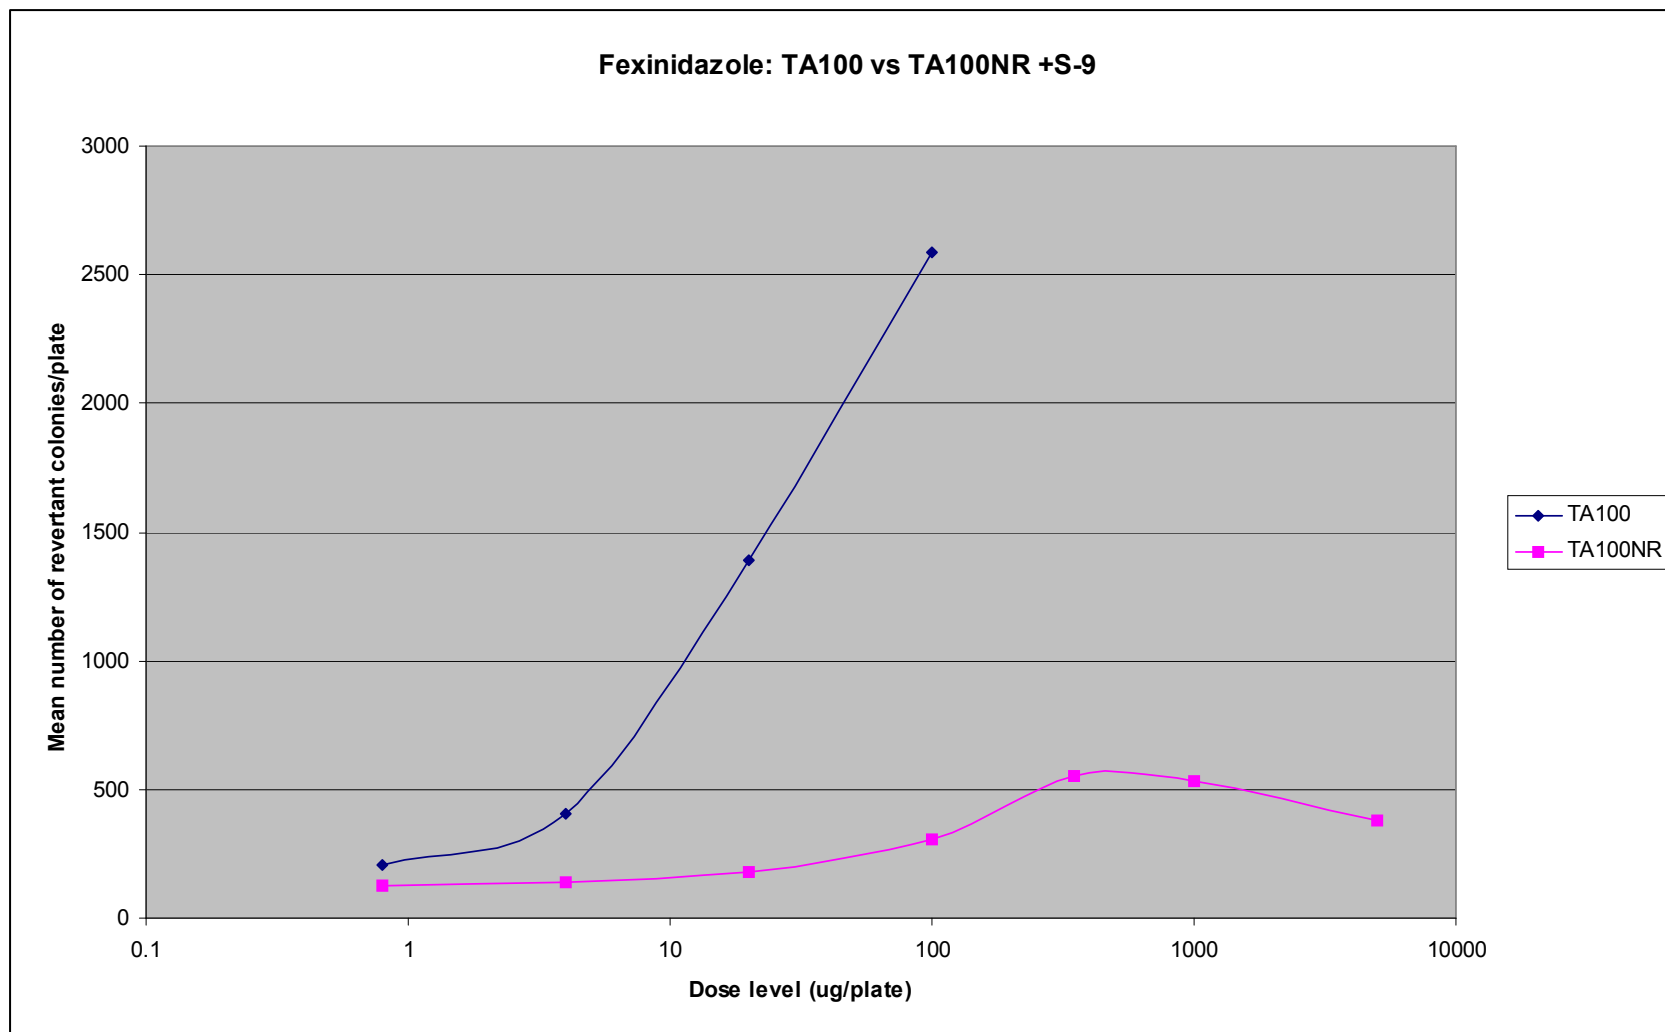

Supplement: Dataset S18 — (0.22 MB PDF) [file pntd.0000923.s019.pdf]
