# Supplementary material for: Fexinidazole – A New Oral Nitroimidazole Drug Candidate Entering Clinical Development for the Treatment of Sleeping Sickness
Source: PLoS Negl Trop Dis. 2010 Dec 21;4(12):e923. doi: 10.1371/journal.pntd.0000923 (PMC3006138; doi:10.1371/journal.pntd.0000923)
Supplement: Dataset S5 — (0.13 MB PDF) [file pntd.0000923.s006.pdf]

# Final Summary Report

Study to investigate the pharmacokinetics and blood brain penetrability of Fexinidazole following intravenous and oral administration in the mouse

*Protocol for* Drugs for Neglected Diseases Initiative (DNDi)

*Address* 1 Place Saint Gervais  
1201 Geneva  
Switzerland

*Tel.* + 41 (0) 22 906 9230

*Fax.* +41 (0) 22 906 9231

*Study Director* BioDynamics Research Limited

*Tel.* \_\_\_\_\_

*Fax.* \_\_\_\_\_

*E-mail.* \_\_\_\_\_

*BioDynamics study no.* DND/01

*Date* 10 December 2008

## Contents

|                                                     | Page |
|-----------------------------------------------------|------|
| Study personnel                                     | 5    |
| Study dates                                         | 5    |
| Study Director's statement                          | 6    |
| Summary                                             | 7    |
| <hr/>                                               |      |
| 1. Materials and methods                            | 9    |
| 1.1 Test compound details                           | 9    |
| 1.2 Mice: source, specification and husbandry       | 9    |
| 1.3 Experimental procedures                         | 9    |
| 1.3.1 Intravenous formulation                       | 9    |
| 1.3.2 Oral formulation                              | 9    |
| 1.4 Dose regimen                                    | 10   |
| 1.5 Dose administration                             | 10   |
| 1.6 Blood sample collection                         | 10   |
| 1.7 Collection of terminal brain samples            | 10   |
| 2. Sample Bioanalysis                               | 10   |
| 2.1.1 Preparation of brain samples                  | 11   |
| 2.1.2 Preparation of study samples                  | 11   |
| 2.2 Chromatography and mass spectroscopy conditions | 11   |
| 3. Pharmacokinetic analysis                         | 12   |
| 3.1.1 Area under the curve (AUC)                    | 12   |
| 4. Maintenance of records/data                      | 12   |
| 5. Protocol/SOP compliance                          | 12   |
| 6. Results                                          | 13   |
| 6.1 Pharmacokinetic analysis                        | 13   |
| 6.2 Plasma results                                  | 14   |
| 6.2.1 Fexinidazole                                  | 14   |
| 6.2.2 Fexinidazole sulfoxide                        | 15   |
| 6.2.3 Fexinidazole sulfone                          | 16   |
| 6.3 Brain results                                   | 19   |

---

---

**Tables**

|          |                                                                                                                                                                                   |    |
|----------|-----------------------------------------------------------------------------------------------------------------------------------------------------------------------------------|----|
| Table 1  | Mean summary pharmacokinetic data of Fexinidazole, sulfone and sulfoxide in plasma following oral and intravenous administration of Fexinidazole to female NMR mice               | 13 |
| Table 2  | Plasma concentrations of Fexinidazole following intravenous administration at a dose level of 1 mg/kg to female NMR1 mice                                                         | 14 |
| Table 3  | Plasma concentrations of Fexinidazole following oral administration at a dose level of 25 mg/kg to female NMR1 mice                                                               | 14 |
| Table 4  | Plasma concentrations of sulfoxide following intravenous administration of Fexinidazole to mice at a dose level 1 mg/kg                                                           | 15 |
| Table 5  | Plasma concentrations of sulfoxide following oral administration of Fexinidazole to mice at 25 mg/kg                                                                              | 16 |
| Table 6  | Plasma concentrations of sulfone following intravenous administration of Fexinidazole at a dose level of 1 mg/kg to female NMR mice                                               | 17 |
| Table 7  | Plasma concentrations of sulfone following oral administration of Fexinidazole at a dose level of 25 mg/kg to female NMR mice                                                     | 17 |
| Table 8  | Mean plasma:brain ratios of Fexinidazole, Sulfone and Sulfoxide                                                                                                                   | 19 |
| Table 9  | Mean brain concentrations of Fexinidazole, sulfone and sulfoxide following intravenous and oral administration of Fexinidazole at 1 and 25 mg/kg respectively to female NMR1 mice | 19 |
| Table 10 | Brain concentrations of Fexinidazole following intravenous and oral administration of Fexinidazole at 1 and 25 mg/kg respectively to female NMR1 mice                             | 20 |
| Table 11 | Brain concentrations of sulfoxide following intravenous and oral administration of Fexinidazole at 1 and 25 mg/kg respectively to female NMR1 mice                                | 20 |
| Table 12 | Brain concentrations of sulfone following intravenous and oral administration of Fexinidazole at 1 and 25 mg/kg respectively to female NMR1 mice                                  | 21 |

---

---

**Figures**

|          |                                                                                                                                                                      |    |
|----------|----------------------------------------------------------------------------------------------------------------------------------------------------------------------|----|
| Figure 1 | Linear plot of mean Fexinidazole, sulfone and sulfoxide concentrations in plasma following intravenous administration of Fexinidazole at 1 mg/kg to female NMRI mice | 18 |
| Figure 2 | Linear plot of mean Fexinidazole, sulfone and sulfoxide concentrations in plasma following oral administration of Fexinidazole at 25 mg/kg to female NMRI mice       | 18 |
| Figure 3 | Brain concentrations of Fexinidazole and its sulfone and sulfoxide metabolites following intravenous administration of Fexinidazole at a dose of 1 mg/kg             | 22 |
| Figure 4 | Brain concentrations of Fexinidazole and its sulfone and sulfoxide metabolites following oral administration of Fexinidazole at a dose of 25 mg/kg.                  | 22 |

---

**Appendices**

|            |                                      |    |
|------------|--------------------------------------|----|
| Appendix 1 | Animal body weights and dose volumes | 23 |
|------------|--------------------------------------|----|

---

## Summary

Two groups of female NMRI mice received an intravenous (n=24) or oral dose (n=27) of the antimicrobial nitroimidazole Fexinidazole at dose levels of 1 and 25 mg/kg respectively.

Following intravenous administration at 1 mg/kg, terminal blood and brain samples were collected from 3 animals per time point at 5, 15, 30, 60, 120, 240, 480 minutes and 24 hours post dose. Similarly, following oral administration terminal blood and brain samples were taken from 3 animals per time point at 15, 30, 60, 120, 240, 360, 480, 720 minutes and 24 hours post dose.

Plasma was prepared from all of the blood samples by centrifugation. All samples were then stored at less than -70°C prior to analysis by LC-MS/MS. Brain samples taken at the 15 minute time-point were also analysed for concentrations of test material. Plasma samples taken at 15, 30 and 60 minutes following the oral dose were screened for the presence of known or potential metabolites (reported separately in DNDi/01: Metabolite ID Summary (Fexinidazole results), 24<sup>th</sup> July 2007) and the concentrations of the sulfone and sulfoxide metabolites were measured in all plasma samples. In addition selected brain samples (5 and 30 minutes for intravenously dosed animals and 30 and 60 minutes from orally dosed animals) were analysed for concentrations of Fexinidazole and its sulfone and sulfoxide metabolites.

No clinical signs were observed following either intravenous or oral administration of Fexinidazole.

Following intravenous administration of Fexinidazole a  $C_{max}$  of 164 ng/mL was achieved with the mean  $T_{max}$  being observed at 5 minutes post-dose (first sampling time point). Plasma concentrations of Fexinidazole were measurable in 2 of 3 animals at 60 minutes post dose but all animals were BLQ by 120 minutes post-dose (LLOQ 10 ng/mL). The mean plasma elimination half life was calculated to be 6 minutes. Oral administration of the compound gave a  $C_{max}$  of 499.8 ng/mL observed at 15 minutes post dose (first sampling time point), with plasma levels measurable in 2 of 3 animals up to 4 hours post dose. At 6 hours post-dose all animals were BLQ (LLOQ 10 ng/mL). The plasma elimination half life following oral administration was calculated to be 48 minutes and the oral bioavailability of the compound was 41.4 %.

Measurement of Fexinidazole concentrations in brain samples indicated that it does penetrate the blood brain barrier. Following intravenous administration a mean maximum concentration of 92.5 ng/mL was observed at 5 minutes post-dose, compared to a plasma concentration of 164.3 ng/mL. This had declined to 12.1 ng/mL by 30 minutes post-dose (plasma concentration 11.7 ng/mL). Following oral administration a mean concentration of 378.8 ng/mL was observed at 15 minutes post-dose compared to a plasma concentration of 499.8 ng/mL. At 60 minutes post-dose this had declined to 254.4 ng/mL compared to 207.9 ng/mL in the plasma.

Sulfoxide metabolite concentrations in brain samples were detectable in all animals following both intravenous and oral administration, while sulfone metabolite concentrations were only detectable after oral administration of Fexinidazole. Sulfoxide concentrations were considerably higher after oral administration compared to intravenous administration. The mean maximum concentrations of sulfone and sulfoxide in plasma after oral administration of Fexinidazole were 6599.6 & 14171 ng/mL respectively with intravenous concentrations being 510.7 and 918.3 ng/mL respectively.

These results suggest that both the sulfone and sulfoxide metabolites cross the blood brain barrier following oral administration, while only the sulfoxide metabolite crosses after intravenous administration. The sulfoxide metabolite was found to have a bioavailability of 114% while the sulfone metabolite had a bioavailability of 48.8% following oral administration of Fexinidazole.

After intravenous administration of Fexinidazole, concentrations of the sulfoxide metabolite were found to increase by approximately 1.5 times between 5 and 30 minutes post dose. At 5 minutes post-dose the concentration of sulfoxide metabolite was ca. 22 times higher in the plasma than in the brain. By 30 minutes post-dose, sulfoxide levels in the brain had increased such that levels were ca.15 times higher in the plasma than in the brain.

Following oral administration of Fexinidazole, both the sulfoxide and sulfone metabolites increased in concentration in the brain between 30 to 60 minutes post dose. The sulfone metabolite increased by approximately 2.5 times while the sulfoxide metabolite increased by approximately 1.5 times. At 30 minutes post-dose the concentration of sulfoxide metabolite was ca. 13 times higher in the plasma than in the brain. By 60 minutes post-dose sulfoxide levels had increased in the brain such that levels were ca. 9 times higher in the plasma than in the brain. At 30 minutes post-dose the concentration of sulfone metabolite was ca. 20 times higher in the plasma than in the brain. By 60 minutes post-dose, concentrations of sulfone in both the brain and plasma had increased similarly, such that sulfone levels were ca. 17 times higher in the plasma than in the brain.

## **1. Materials and methods**

### **1.1 Test compound details**

Fexinidazole (S751239-E, Hoechst sample) and its sulfone and sulfoxide metabolites (LPF-sulfone and LPF-sulfoxide) were supplied by DNDi.

Previous studies (not conducted by BioDynamics) reported that Fexinidazole had poor solubility therefore intravenous administration at a dose level of 1 mg/kg was chosen;

- to allow formulation at low concentration, to ensure a suitable dosing formulation was administered (solution)
- as this would not pose a problem in terms of analytical sensitivity using generic mass spectrometry conditions.

### **1.2 Mice: source, specification and husbandry**

Female NMRI mice (Harlan UK, Shaws Farm, Bicester Oxon) were used for this study.

On arrival, all mice were examined for external signs of ill-health and any unhealthy animals excluded from the study. Mice were housed in groups of twenty in polypropylene cages with solid floors, in a thermostatically monitored room ( $21 \pm 2^{\circ}\text{C}$ ) and exposed to 12 hours fluorescent lighting and 12 hours dark per day. The temperature and relative humidity (range 45 - 65%) of the holding room were recorded on a daily basis throughout the study. Animals were equilibrated under standard animal house conditions for a minimum of 2 days prior to use.

Pellet diet (RM1 (E) SQC, Special Diets Services, Witham, Essex, U.K.) and water, from the domestic water supply, was available *ad libitum* throughout the experimental and acclimatisation periods. There were no known contaminants present in the diet or drinking water, which could in the opinion of the Study Director, have interfered with or affected the outcome of the study.

### **1.3 Experimental procedures**

#### **1.3.1 Intravenous formulation**

The intravenous formulation was prepared using a standard formulation for poorly soluble compounds, this comprised of 10% dimethyl sulphoxide (DMSO) and 90% hydroxyl-propyl- $\beta$ -cyclodextrin (HP $\beta$ CD) 10% w/v in PBS pH7.4. The test material was initially dissolved in DMSO at 1 mg/mL free base, followed by dilution of the co solvent stock to 0.1 mg/mL with the addition of 10% HP $\beta$ CD. This gave a final intravenous dose comprising of 0.1 mg/mL test material, 10% DMSO and 90% HP $\beta$ CD (10% w/v in PBS pH7.4).

#### **1.3.2 Oral formulation**

The oral dose was formulated by suspending the test material in 1% DMSO/99% methyl-cellulose (1% w/v in water) at a concentration of 2.5 mg/mL free base.

## 1.4 Dose regimen

Two groups of female mice were dosed as follows:

| Group Number | Treatment                | Dose (mg/kg) | Route |
|--------------|--------------------------|--------------|-------|
| 1            | Fexinidazole (S751239-E) | 1            | i.v.  |
| 2            | Fexinidazole (S751239-E) | 25           | p.o.  |

All doses are expressed as free base

## 1.5 Dose administration

Intravenous doses were administered into a lateral tail vein using an appropriately sized syringe and 25G needle and the oral formulation by oral gavage using a polypropylene gavage tube. All doses were given as a single bolus dose at a constant dose volume of 10.0 mL/kg.

## 1.6 Blood sample collection

At each sampling time point, three animals in each treatment group were deeply anaesthetised using isoflurane and blood samples (approximately 1 mL) taken into individual heparinised tubes by cardiac puncture, following which the animals were killed by cervical fracture. Samples were collected at the following times post-dose:

Intravenous 5, 15, 30, 60, 120, 240, 480 minutes and 24 hours

Oral 15, 30, 60, 120, 240, 360, 480, 720 minutes and 24 hours

Following collection, the blood samples were centrifuged (approximately 10000 g, 2 min at 4 °C) and the plasma retained as one aliquot at approximately -70°C prior to analysis of test material concentrations at BioDynamics by LC-MS/MS.

## 1.7 Collection of terminal brain samples

Following collection of the terminal blood sample the cranium of each mouse was carefully opened and the brain removed. Excess blood was washed from the brain with distilled water and any excess fluid blotted on absorbent paper. The brain was then snap frozen using liquid nitrogen and placed into a suitably labelled container and stored frozen at approximately -70°C pending analysis.

## 2. Sample Bioanalysis

All of the plasma samples together with the brains from the 15 minute time point were analysed for concentrations of the test material and its sulfone and sulfoxide metabolites. In addition the brains from the 5 and 30 minute time points for the intravenously treated and the 30 and 60 minute time points for the orally treated animals were analysed for concentrations of Fexinidazole and its sulfone and sulfoxide metabolites using an LC-MS/MS method developed at BioDynamics.

All samples were treated as temperature sensitive. Blood samples were collected onto wet ice, followed by centrifugation at 4°C. Plasma and brain samples were snap frozen on dry ice (plasma) or liquid nitrogen (brains) prior to long term storage at less than -70°C pending analysis.

### 2.1.1 Preparation of brain samples

Prior to analysis for test material concentrations, brain samples were weighed and homogenized with the addition of 2 mL de-ionized water per gram of brain tissue (for example, a brain weighing 0.386 g would be homogenized with 0.772 mL de-ionized water). Homogenates were then placed in an ultrasonic bath and sonicated for 10 minutes.

Due to this homogenization procedure, results expressed as ng/mL of brain homogenate are converted to ng/g brain using a multiplication factor of 3.

### 2.1.2 Preparation of study samples

All study samples (plasma and brain) were extracted by adding 200  $\mu$ L of the study sample (plasma) or homogenate (brain), 200  $\mu$ L methanol and 400  $\mu$ L internal standard solution in acetonitrile into a 1.5 mL eppendorf tube. This was vortex mixed for ca. 5 minutes to precipitate proteins before being centrifuged for 5 minutes at 12000 rpm. 200  $\mu$ L of the resulting supernatant was then removed and transferred to an autosampler vial for analysis.

## 2.2 Chromatography and mass spectroscopy conditions

The chromatographic system used for on-line LC-MS and LC-MS/MS analysis of the reference materials, internal standard and study samples consisted of a Surveyor auto sampler and HPLC pump with ternary gradient unit linked to a Thermo TSQ Quantum triple quadrupole mass spectrometer operating in positive ion mode.

Data files were processed using LCQuan software for Windows running on a Dell™ personal workstation.

Liquid chromatography was carried out with a Waters Xterra MS 5 $\mu$ m C18 10cm x 3mm analytical column (Phenomenex™). The mobile phase was a 0.1% formic acid in water: 0.1% formic acid in acetonitrile gradient. The flow rate was 0.2 mL/min and the injection volume was 40  $\mu$ L.

The MS/MS conditions were:

|              | Ionisation mode                    | Electrospray in +ve ion mode |
|--------------|------------------------------------|------------------------------|
| Compound     | MRM                                | Collision Energy (eV)        |
| Fexinidazole | m/z 280.03 $\rightarrow$ m/z 139.9 | 20                           |
|              | m/z 280.06 $\rightarrow$ m/z 124.9 | 44                           |
|              | m/z 280.07 $\rightarrow$ m/z 140.9 | 27                           |
| Sulfoxide    | m/z 296.03 $\rightarrow$ m/z 233.0 | 28                           |
|              | m/z 296.04 $\rightarrow$ m/z 140.0 | 24                           |
|              | m/z 296.05 $\rightarrow$ m/z 141.0 | 27                           |
| Sulfone      | m/z 312.04 $\rightarrow$ m/z 141.0 | 23                           |
|              | m/z 312.05 $\rightarrow$ m/z 141.0 | 30                           |
|              | m/z 312.06 $\rightarrow$ m/z 111.0 | 41                           |

Summed transitions were used to enhance sensitivity. No instability of the test materials was noted during the course of analysis or on re-injection of the samples into the mass spectrometer under the conditions documented.

### **3. Pharmacokinetic analysis**

The plasma concentration vs time curves obtained following intravenous and oral administration of the test compounds to female mice were analysed using WinNonLin (Version 4.1, Scientific Consulting Inc. USA). The kinetic data were characterised by a non-compartmental analysis (NCA).

The following pharmacokinetic parameters were derived from the profiles: maximum peak plasma concentration (C<sub>max</sub>); the time of maximum observed concentration (T<sub>max</sub>); the terminal half life (T<sub>1/2</sub>), and area under the plasma concentration curve (AUC),

#### **3.1.1 Area under the curve (AUC)**

The AUC was determined using the linear/log trapezoidal method. A value of zero was used for any plasma concentrations recorded as below the limits of quantification (LLOQ). The AUC<sub>inf</sub> (observed) was calculated as the area under the curve from the time of dosing extrapolated to time infinity based on the observed concentrations. The AUC<sub>last</sub> was also determined. The AUC<sub>last</sub> parameter is defined as the area under the curve from the point of dosing to the last measurable concentration.

### **4. Maintenance of records/data**

On completion of the study all records for the study were collected and retained by the Study Director. Upon authorisation of the report the records will be transferred to BioDynamics archives and will be retained for a period of three years, the Sponsor will then be contacted with regard to future storage.

### **5. Protocol/SOP compliance**

BioDynamics adopted all reasonable measures to carry out the study in accordance with the protocol and Standard Operating Procedures. Under practical working conditions however, some minor variations may have occurred due to circumstances beyond the control of BioDynamics. Any deviations were documented in the study records, together with the reason for their occurrence.

## 6. Results

No unusual clinical observations were made following dosing of either of the groups of animals.

### 6.1 Pharmacokinetic analysis

**Table 1** Mean summary pharmacokinetic data of Fexinidazole, sulfone and sulfoxide in plasma following oral and intravenous administration of Fexinidazole to female NMR mice

|                                                     | <b>C<sub>max</sub></b><br><b>(ng/mL)</b> | <b>T<sub>max</sub></b><br><b>(h)</b> | <b>T<sub>1/2</sub></b><br><b>(h)</b> | <b>AUC<sub>0-24</sub></b><br><b>(h.ng/mL)</b> | <b>AUC<sub>0-inf</sub></b><br><b>(h.ng/mL)</b> | <b>Oral</b><br><b>Bioavailability</b><br><b>(%F)</b> |
|-----------------------------------------------------|------------------------------------------|--------------------------------------|--------------------------------------|-----------------------------------------------|------------------------------------------------|------------------------------------------------------|
| Fexinidazole (i.v.)                                 | 164                                      | 0.0833                               | 0.1                                  | 41                                            | 42                                             | 41.4                                                 |
| Fexinidazole (p.o.)                                 | 499.8                                    | 0.25                                 | 0.8                                  | 424                                           | 439                                            |                                                      |
| Sulfoxide                                           | 918.3                                    | 0.25                                 | 0.6                                  | 1586.1                                        | 1555.4                                         | 114                                                  |
| Sulfoxide                                           | 14171                                    | 0.5                                  | 1.0                                  | 45030.5                                       | 45002.2                                        |                                                      |
| Sulfone (i.v.<br>administration of<br>Fexinidazole) | 790.4                                    | 2                                    | n.d.                                 | 7990.3                                        | nd                                             | 48                                                   |
| Sulfone (p.o.<br>administration of<br>Fexinidazole) | 13651.3                                  | 4                                    | 1.7                                  | 96286.4                                       | 96307.6                                        |                                                      |

|                     |   |                                                                                |
|---------------------|---|--------------------------------------------------------------------------------|
| C <sub>max</sub>    | = | maximum plasma concentration                                                   |
| T <sub>max</sub>    | = | time of maximum plasma concentration                                           |
| AUC <sub>0-24</sub> | = | area under curve from time of dosing to the last measurable concentration      |
| AUC <sub>inf</sub>  | = | area under curve from time of dosing extrapolated to infinity (observed conc.) |
| T <sub>1/2</sub>    | = | terminal elimination half life                                                 |
| n.d.                | = | not determined                                                                 |

## 6.2 Plasma results

### 6.2.1 Fexinidazole

Following intravenous administration of Fexinidazole at 1mg/kg, the mean  $C_{max}$  was 164 ng/mL with  $T_{max}$  being observed at the first sampling time point of 5 minutes post-dose. Plasma concentrations of Fexinidazole were measurable up to 30 minutes after injection with the mean  $AUC_{0-24}$  being 41 ng/mL\*hr and the mean terminal elimination half life 6 minutes.

Following oral administration of Fexinidazole at 25mg/kg, the mean  $C_{max}$  was 499.8 ng/mL and  $T_{max}$  observed at 15 minutes post-dose which is the first sampling time point. Plasma concentrations of Fexinidazole were measurable up to 4 hours after administration with the mean  $AUC_{0-24}$  being 424 ng/mL\*hr and the mean terminal elimination half life 48 minutes.

The oral bioavailability was 41.4% based on the i.v. profile.

**Table 2 Plasma concentrations of Fexinidazole following intravenous administration at a dose level of 1 mg/kg to female NMR1 mice**

| Time point (min) | Concentration (ng/mL) |        |       |        |       |        |       |      |
|------------------|-----------------------|--------|-------|--------|-------|--------|-------|------|
|                  |                       | Animal |       | Animal |       | Animal | Mean  | SD   |
| 5                | 178.0                 | 103    | 139.9 | 104    | 174.9 | 105    | 164.3 | 21.2 |
| 15               | 28.0                  | 106    | 29.8  | 107    | 26.8  | 108    | 28.2  | 1.5  |
| 30               | 11.3                  | 109    | 11.0  | 110    | 12.8  | 111    | 11.7  | 1.0  |
| 60               | 11.8                  | 112    | 11.5  | 113    | BLQ   | 114    | BLQ   | NC   |
| 120              | BLQ                   | 115    | BLQ   | 116    | BLQ   | 117    | BLQ   | NC   |
| 240              | BLQ                   | 118    | BLQ   | 119    | BLQ   | 120    | BLQ   | NC   |
| 480              | BLQ                   | 121    | BLQ   | 122    | BLQ   | 123    | BLQ   | NC   |
| 1440             | BLQ                   | 124    | BLQ   | 125    | BLQ   | 126    | BLQ   | NC   |

LLOQ = 10 ng/mL

BLQ = below limit of quantification

NC = not calculated

**Table 3 Plasma concentrations of Fexinidazole following oral administration at a dose level of 25 mg/kg to female NMR1 mice**

| Time point (min) | Concentration (ng/mL) |        |       |        |       |        |       |      |
|------------------|-----------------------|--------|-------|--------|-------|--------|-------|------|
|                  |                       | Animal |       | Animal |       | Animal | Mean  | SD   |
| 15               | 442.7                 | 127    | 494.3 | 128    | 562.5 | 129    | 499.8 | 60.1 |
| 30               | 301.1                 | 130    | 227.1 | 131    | 162.1 | 132    | 230.1 | 69.5 |
| 60               | 295.2                 | 133    | 158.4 | 134    | 170.1 | 135    | 207.9 | 75.8 |
| 120              | 53.9                  | 136    | 36.8  | 137    | 50.2  | 138    | 47.0  | 9.0  |
| 240              | BLQ                   | 139    | 12.6  | 140    | 34.8  | 141    | 15.8  | 17.6 |
| 360              | BLQ                   | 142    | BLQ   | 143    | BLQ   | 144    | BLQ   | NC   |
| 480              | BLQ                   | 145    | BLQ   | 146    | BLQ   | 147    | BLQ   | NC   |
| 720              | BLQ                   | 148    | BLQ   | 149    | BLQ   | 150    | BLQ   | NC   |
| 1440             | BLQ                   | 151    | BLQ   | 152    | BLQ   | 153    | BLQ   | NC   |

LLOQ = 10 ng/mL

NC = not calculated

BLQ = below limit of quantification

### 6.2.2 Fexinidazole sulfoxide

Following intravenous administration of Fexinidazole at 1mg/kg, the mean maximum plasma concentration of the sulfoxide metabolite ( $C_{max}$ ) was 918.3 ng/mL at 15 minutes ( $T_{max}$ ) post-dose. Plasma concentrations of Fexinidazole sulfoxide were measurable up to 4 hours after injection. The mean  $AUC_{0-24}$  for the sulfoxide metabolite was 1586.1 h\*ng/mL and the mean terminal elimination half life ( $t_{1/2}$ ) was 36 minutes. Fexinidazole sulfoxide metabolite was shown to have crossed the blood brain barrier with means of 119.6 ng/g and 172.7 ng/g present at 5 and 30 minutes, respectively.

Following oral administration of Fexinidazole at 25mg/kg, the mean maximum plasma concentration of the sulfoxide metabolite ( $C_{max}$ ) was 14171 ng/mL at 30 minutes ( $T_{max}$ ) post-dose. Plasma concentrations of Fexinidazole sulfoxide were measurable up to 8 hours post-dose in all subjects and up to 24 hours in one subject. The mean  $AUC_{0-24}$  for the sulfoxide metabolite was 45030.5 h\*ng/mL and the mean terminal elimination half life ( $t_{1/2}$ ) was 1 hour. Fexinidazole sulfoxide metabolite was shown to have crossed the blood brain barrier with means of 3314.7 ng/g and 4873.1 ng/g present at 30 and 60 minutes, respectively.

The bioavailability of Fexinidazole sulfoxide following oral administration of Fexinidazole was 114%.

**Table 4** Plasma concentrations of sulfoxide following intravenous administration of Fexinidazole to mice at a dose level 1 mg/kg

| Time (min) | Fexinidazole Sulfoxide Concentration (ng/mL) |        |       |        |       |        |       |       |
|------------|----------------------------------------------|--------|-------|--------|-------|--------|-------|-------|
|            |                                              | Animal |       | Animal |       | Animal | Mean  | SD    |
| 5          | 907.2                                        | 103    | 889.2 | 104    | 839.2 | 105    | 878.5 | 35.2  |
| 15         | 904.6                                        | 106    | 870.5 | 107    | 979.7 | 108    | 918.3 | 55.9  |
| 30         | 914.0                                        | 109    | 924.1 | 110    | 836.3 | 111    | 891.5 | 48.0  |
| 60         | 856.8                                        | 112    | 841.2 | 113    | 569.5 | 114    | 755.8 | 161.6 |
| 120        | 245.9                                        | 115    | 240.8 | 116    | 283.4 | 117    | 256.7 | 23.3  |
| 240        | 20.2                                         | 118    | 32.1  | 119    | 32.7  | 120    | 28.3  | 7.1   |
| 480        | BLQ                                          | 121    | BLQ   | 122    | BLQ   | 123    | BLQ   | NC    |
| 1440       | BLQ                                          | 124    | BLQ   | 125    | BLQ   | 126    | BLQ   | NC    |

LLOQ = 25 ng/mL

BLQ = below limit of quantification

NC = not calculated

**Table 5** Plasma concentrations of sulfoxide following oral administration of Fexinidazole to mice at 25 mg/kg

| Time (hrs) | Fexinidazole Sulfoxide Concentration (ng/mL) |        |         |        |         |        |         |        |
|------------|----------------------------------------------|--------|---------|--------|---------|--------|---------|--------|
|            |                                              | Animal |         | Animal |         | Animal | Mean    | SD     |
| 15         | 8093.7                                       | 127    | 8721.5  | 128    | 6377.7  | 129    | 7731.0  | 1213.3 |
| 30         | 16785.3                                      | 130    | 14730.3 | 131    | 10997.5 | 132    | 14171.0 | 2934.2 |
| 60         | 17054.0                                      | 133    | 12390.4 | 134    | 12371.9 | 135    | 13938.8 | 2697.9 |
| 120        | 13725.6                                      | 136    | 11039.6 | 137    | 10593.0 | 138    | 11786.1 | 1694.5 |
| 240        | 4429.0                                       | 139    | 3600.3  | 140    | 6059.0  | 141    | 4696.1  | 1250.9 |
| 360        | 743.0                                        | 142    | 809.9   | 143    | 741.9   | 144    | 764.9   | 38.9   |
| 480        | 437.8                                        | 145    | 961.9   | 146    | 47.5    | 147    | 482.4   | 458.8  |
| 720        | BLQ                                          | 148    | BLQ     | 149    | 22.1    | 150    | BLQ     | NC     |
| 1440       | BLQ                                          | 151    | BLQ     | 152    | BLQ     | 153    | BLQ     | NC     |

LLOQ = 25 ng/mL

BLQ = below limit of quantification

NC = not calculated

### 6.2.3 Fexinidazole sulfone

Following intravenous administration of Fexinidazole at 1mg/kg, the mean maximum plasma concentration of the sulfone metabolite ( $C_{max}$ ) was 790.4 ng/mL at 2 hours ( $T_{max}$ ) post-dose. Plasma concentrations of Fexinidazole sulfone were measurable up to 8 hours after injection. The mean  $AUC_{0-24}$  for the sulfone metabolite was 7990.3 h\*ng/mL. The mean terminal elimination half life ( $t_{1/2}$ ) was not determined. Fexinidazole sulfone metabolite could not be measured in brain at either 5 or 30 minutes.

Following oral administration of Fexinidazole at 25mg/kg, the mean maximum plasma concentration of the sulfone metabolite ( $C_{max}$ ) was 13651.3 ng/mL at 4 hours ( $T_{max}$ ) post-dose. Plasma concentrations of Fexinidazole sulfone were measurable up to 24 hours after injection in 2 out of 4 subjects. The mean  $AUC_{0-24}$  for the sulfone metabolite was 96286.4 h\*ng/mL and the mean terminal elimination half life ( $t_{1/2}$ ) was 1.7 hours. Fexinidazole sulfone metabolite was shown to have crossed the blood brain barrier with means of 467.8 ng/g and 1182.6 ng/g present at 30 and 60 minutes, respectively.

The bioavailability of Fexinidazole sulfone following oral administration of Fexinidazole was 48%.

**Table 6** Plasma concentrations of sulfone following intravenous administration of Fexinidazole at a dose level of 1 mg/kg to female NMR mice

| Time (hrs)  | Fexinidazole Sulfone Concentration (ng/mL) |        |       |        |       |        |       |       |
|-------------|--------------------------------------------|--------|-------|--------|-------|--------|-------|-------|
|             |                                            | Animal |       | Animal |       | Animal | Mean  | SD    |
| <b>5</b>    | 40.9                                       | 103    | 28.8  | 104    | 41.4  | 105    | 37.0  | 7.1   |
| <b>15</b>   | 176.5                                      | 106    | 355.2 | 107    | 237.7 | 108    | 256.5 | 90.8  |
| <b>30</b>   | 535.7                                      | 109    | 539.8 | 110    | 456.7 | 111    | 510.7 | 46.8  |
| <b>60</b>   | 542.2                                      | 112    | 615.3 | 113    | 955.4 | 114    | 704.3 | 220.5 |
| <b>120</b>  | 903.2                                      | 115    | 564.8 | 116    | 903.3 | 117    | 790.4 | 195.4 |
| <b>240</b>  | 665.9                                      | 118    | 756.3 | 119    | 889.5 | 120    | 770.6 | 112.5 |
| <b>480</b>  | 446.7                                      | 121    | 268.3 | 122    | 426.4 | 123    | 380.5 | 97.7  |
| <b>1440</b> | BLQ                                        | 124    | BLQ   | 125    | BLQ   | 126    | BLQ   | NC    |

LLOQ = 25 ng/mL

BLQ = below limit of quantification

NC = not calculated

**Table 7** Plasma concentrations of sulfone following oral administration of Fexinidazole at a dose level of 25 mg/kg to female NMR mice

| Time (hrs)  | Fexinidazole Sulfone Concentration (ng/mL) |        |         |        |         |        |         |        |
|-------------|--------------------------------------------|--------|---------|--------|---------|--------|---------|--------|
|             |                                            | Animal |         | Animal |         | Animal | Mean    | SD     |
| <b>15</b>   | 1505.7                                     | 127    | 1681.2  | 128    | 999.9   | 129    | 1395.6  | 353.7  |
| <b>30</b>   | 3843.6                                     | 130    | 3396.1  | 131    | 2119.0  | 132    | 3119.6  | 894.9  |
| <b>60</b>   | 7929.0                                     | 133    | 6023.8  | 134    | 5845.9  | 135    | 6599.6  | 1154.8 |
| <b>120</b>  | 13439.1                                    | 136    | 11836.1 | 137    | 9732.3  | 138    | 11669.2 | 1859.0 |
| <b>240</b>  | 19022.3                                    | 139    | 11734.1 | 140    | 10197.6 | 141    | 13651.3 | 4714.4 |
| <b>360</b>  | 10481.7                                    | 142    | 8749.6  | 143    | 12434.7 | 144    | 10555.3 | 1843.7 |
| <b>480</b>  | 8519.8                                     | 145    | 9327.3  | 146    | 7476.6  | 147    | 8441.2  | 927.8  |
| <b>720</b>  | 659.4                                      | 148    | 753.5   | 149    | 1235.0  | 150    | 882.6   | 308.8  |
| <b>1440</b> | 16.3                                       | 151    | 10.4    | 152    | BLQ     | 153    | BLQ     | NC     |

LLOQ = 25 ng/mL

BLQ = below limit of quantification

NC = not calculated

**Figure 1** Linear plot of mean Fexinidazole, sulfone and sulfoxide concentrations in plasma following intravenous administration of Fexinidazole at 1 mg/kg to female NMRI mice

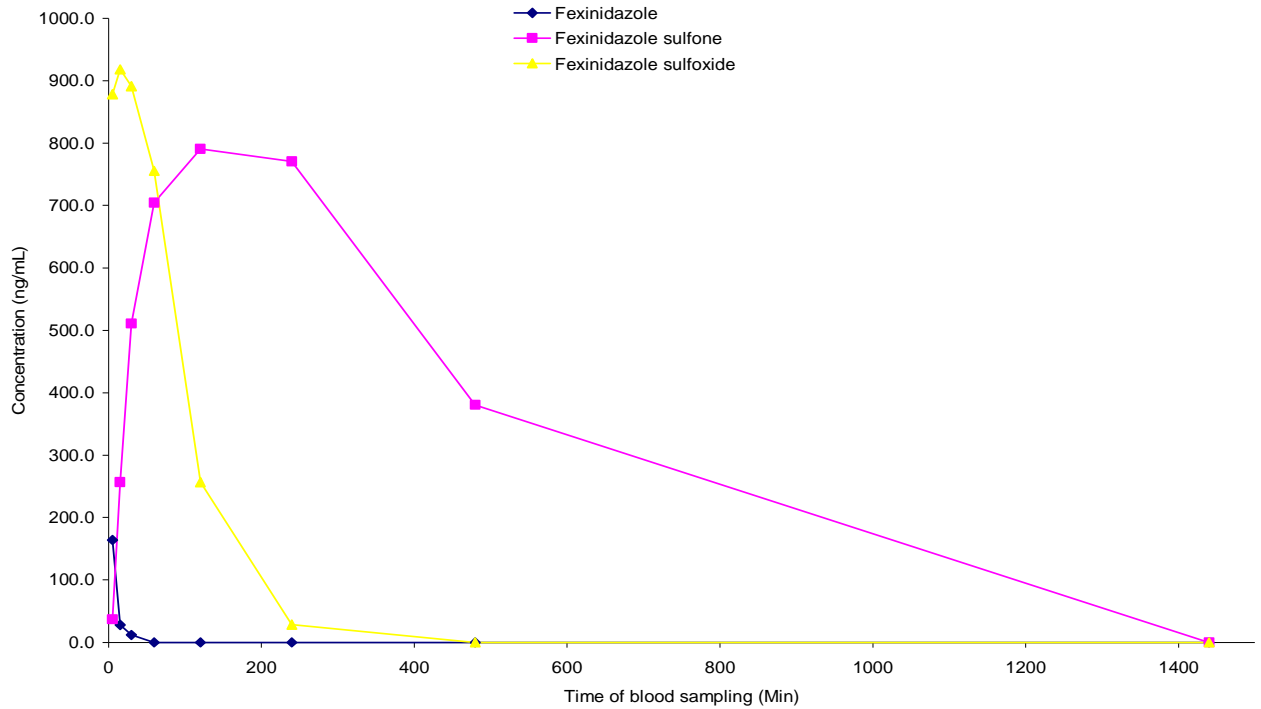

**Figure 2** Linear plot of mean Fexinidazole, sulfone and sulfoxide concentrations in plasma following oral administration of Fexinidazole at 25 mg/kg to female NMRI mice

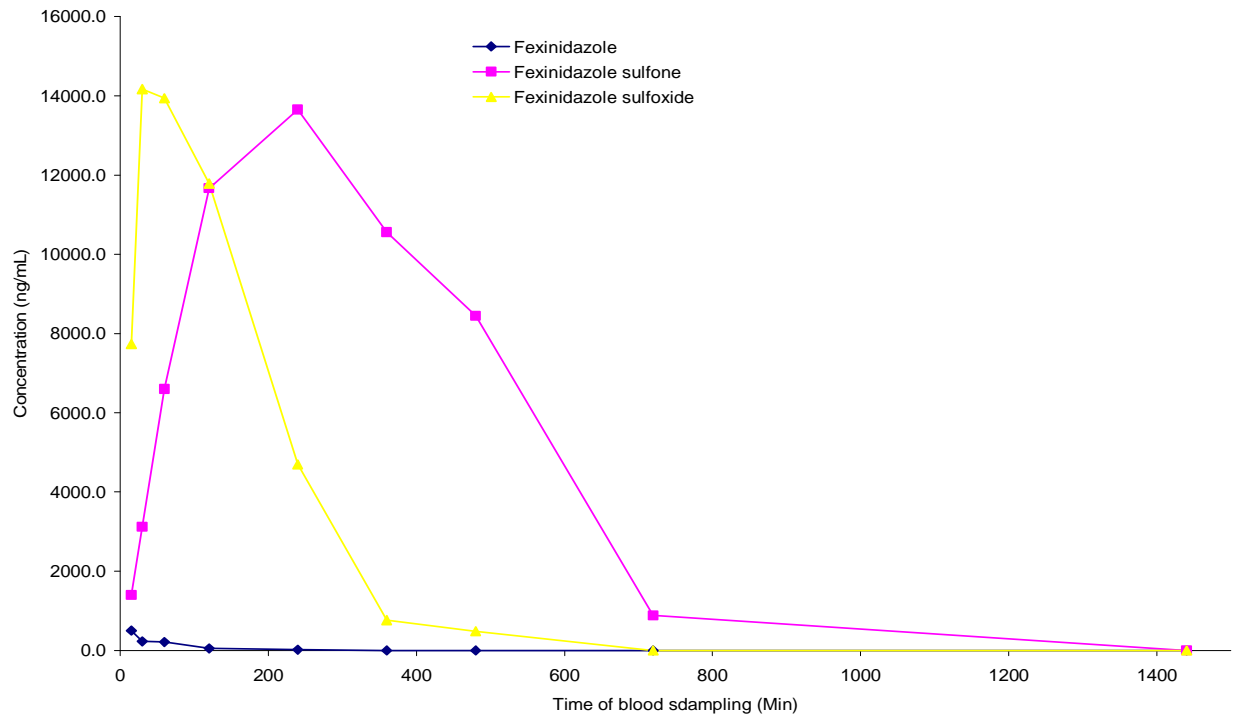

### 6.3 Brain results

Following intravenous administration of Fexinidazole at 1 mg/kg Fexinidazole was shown to have crossed the blood brain barrier with a mean concentration of 277.4 ng/g (per gram of homogenised brain) at 5 minutes post-dose. This had declined to 36.2 ng/g by 30 minutes post-dose.

Following oral administration of Fexinidazole at 25 mg/kg Fexinidazole was shown to have crossed the blood brain barrier following oral administration with a mean concentration of 1136.4 ng/g at 15 minutes post-dose. By 60 minutes post-dose this had declined to 763.3 ng/g.

**Table 8 Mean plasma:brain ratios of Fexinidazole, Sulfone and Sulfoxide**

IV

| Sample time (mins) | Plasma | Brain Fexinidazole | Brain Sulfone | Brain Sulfoxide |
|--------------------|--------|--------------------|---------------|-----------------|
| 5                  | 1.00   | 0.56               | 0             | 0.045           |
| 15                 | 1.00   | 0.76               | NST           | NST             |
| 30                 | 1.00   | 1.03               | 0             | 0.064           |

PO

| Sample time (mins) | Plasma | Brain Fexinidazole | Brain Sulfone | Brain Sulfoxide |
|--------------------|--------|--------------------|---------------|-----------------|
| 15                 | 1.00   | 0.76               | NST           | NST             |
| 30                 | 1.00   | 1.16               | 0.05          | 0.078           |
| 60                 | 1.00   | 1.22               | 0.06          | 0.12            |

NST = no sample taken

**Table 9 Mean brain concentrations of Fexinidazole, sulfone and sulfoxide following intravenous and oral administration of Fexinidazole at 1 and 25 mg/kg respectively to female NMR1 mice**

IV

|           | Mean Concentration ng/mL (ng/g) |         |              |
|-----------|---------------------------------|---------|--------------|
| Timepoint | Fexinidazole                    | Sulfone | Sulfoxide    |
| 5         | 92.5 (277.4)                    | BLQ     | 39.9 (119.6) |
| 15        | 21.3 (63.8)                     | NST     | NST          |
| 30        | 12.1 (36.2)                     | BLQ     | 57.6 (172.7) |

PO

|           | Mean Concentration ng/mL (ng/g) |                |                 |
|-----------|---------------------------------|----------------|-----------------|
| Timepoint | Fexinidazole                    | Sulfone        | Sulfoxide       |
| 15        | 378.8 (1136.4)                  | NST            | NST             |
| 30        | 266.5 (799.5)                   | 155.9 (467.8)  | 1104.9 (3314.7) |
| 60        | 254.4 (763.3)                   | 394.2 (1182.6) | 1624.4 (4873.1) |

NST = no sample taken

**Table 10** Brain concentrations of Fexinidazole following intravenous and oral administration of Fexinidazole at 1 and 25 mg/kg respectively to female NMR1 mice

IV

|            | Concentration of brain homogenate ng/mL (ng/g) |        |              |        |                |        |
|------------|------------------------------------------------|--------|--------------|--------|----------------|--------|
| Time (min) |                                                | Animal |              | Animal |                | Animal |
| 5          | 81.9 (254.7)                                   | 103    | 75.8 (227.4) | 104    | 119.7 (359..1) | 105    |
| 15         | 22.2 (66.6)                                    | 106    | 21.4 (64.2)  | 107    | 20.2 (60.6)    | 108    |
| 30         | 13.2 (39.6)                                    | 109    | 11.2 (33.6)  | 110    | 11.8 (35.4)    | 111    |

PO

|            | Concentration of brain homogenate ng/mL (ng/g) |        |                |        |                |        |
|------------|------------------------------------------------|--------|----------------|--------|----------------|--------|
| Time (min) |                                                | Animal |                | Animal |                | Animal |
| 15         | 381.4 (1144.2)                                 | 127    | 359.6 (1078.8) | 128    | 395.4 (1186.2) | 129    |
| 30         | 286.1 (858.3)                                  | 130    | 282.5 (847.5)  | 131    | 230.9 (692.7)  | 132    |
| 60         | 288.0 (864.0)                                  | 133    | 229.4 (688.2)  | 134    | 245.9 (737.7)  | 135    |

LLOQ = 5 ng/mL or 15 ng/g

**Table 11** Brain concentrations of sulfoxide following intravenous and oral administration of Fexinidazole at 1 and 25 mg/kg respectively to female NMR1 mice

IV

|            | Concentration of brain homogenate ng/mL (ng/g) |        |              |        |              |        |
|------------|------------------------------------------------|--------|--------------|--------|--------------|--------|
| Time (min) |                                                | Animal |              | Animal |              | Animal |
| 5          | 37.3(111.9)                                    | 103    | 40.2 (120.6) | 104    | 42.1 (126.3) | 105    |
| 30         | 51.1 (153.3)                                   | 109    | 59.3 (177.9) | 110    | 62.3 (186.9) | 111    |

PO

|            | Concentration of brain homogenate ng/mL (ng/g) |        |                  |        |                 |        |
|------------|------------------------------------------------|--------|------------------|--------|-----------------|--------|
| Time (min) |                                                | Animal |                  | Animal |                 | Animal |
| 30         | 1351.9 (4055.7)                                | 130    | 1473.9 (44.21.7) | 131    | 488.9 (1466.7)  | 132    |
| 60         | 2305.8 (6917.4)                                | 133    | 776.2 (2328.6)   | 134    | 1791.1 (5373.3) | 135    |

LLOQ = 5 ng/mL or 15 ng/g

**Table 12 Brain concentrations of sulfone following intravenous and oral administration of Fexinidazole at 1 and 25 mg/kg respectively to female NMR1 mice**

**IV**

|            | Concentration of brain homogenate ng/mL (ng/g) |        |           |        |           |        |
|------------|------------------------------------------------|--------|-----------|--------|-----------|--------|
| Time (min) |                                                | Animal |           | Animal |           | Animal |
| 5          | BLQ (BLQ)                                      | 103    | BLQ (BLQ) | 104    | BLQ (BLQ) | 105    |
| 30         | BLQ (BLQ)                                      | 109    | BLQ (BLQ) | 110    | BLQ (BLQ) | 111    |

**PO**

|            | Concentration of brain homogenate ng/mL (ng/g) |        |               |        |                |        |
|------------|------------------------------------------------|--------|---------------|--------|----------------|--------|
| Time (min) |                                                | Animal |               | Animal |                | Animal |
| 30         | 207.2 (621.6)                                  | 130    | 189.4 (568.2) | 131    | 71.2 (213.6)   | 132    |
| 60         | 477.7 (1433.1)                                 | 133    | 273.3 (819.9) | 134    | 431.6 (1294.8) | 135    |

LLOQ = 25 ng/mL or 75 ng/g

**Figure 3** Brain concentrations of Fexinidazole and its sulfone and sulfoxide metabolites following intravenous administration of Fexinidazole at a dose of 1 mg/kg

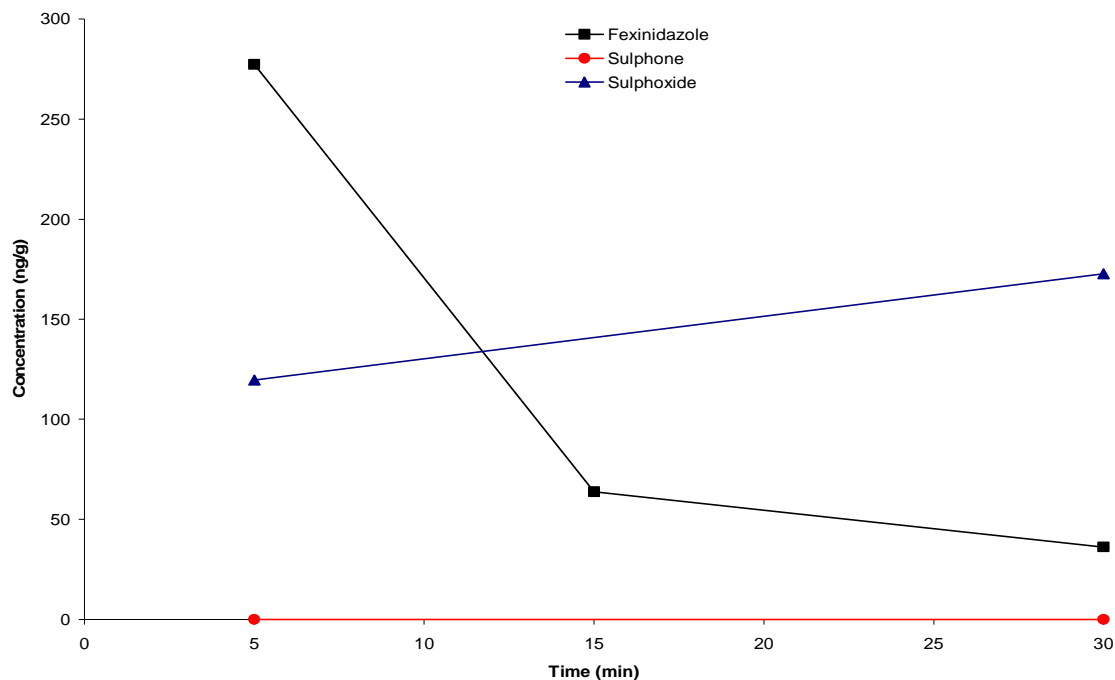

**Figure 4** Brain concentrations of Fexinidazole and its sulfone and sulfoxide metabolites following oral administration of Fexinidazole at a dose of 25 mg/kg.

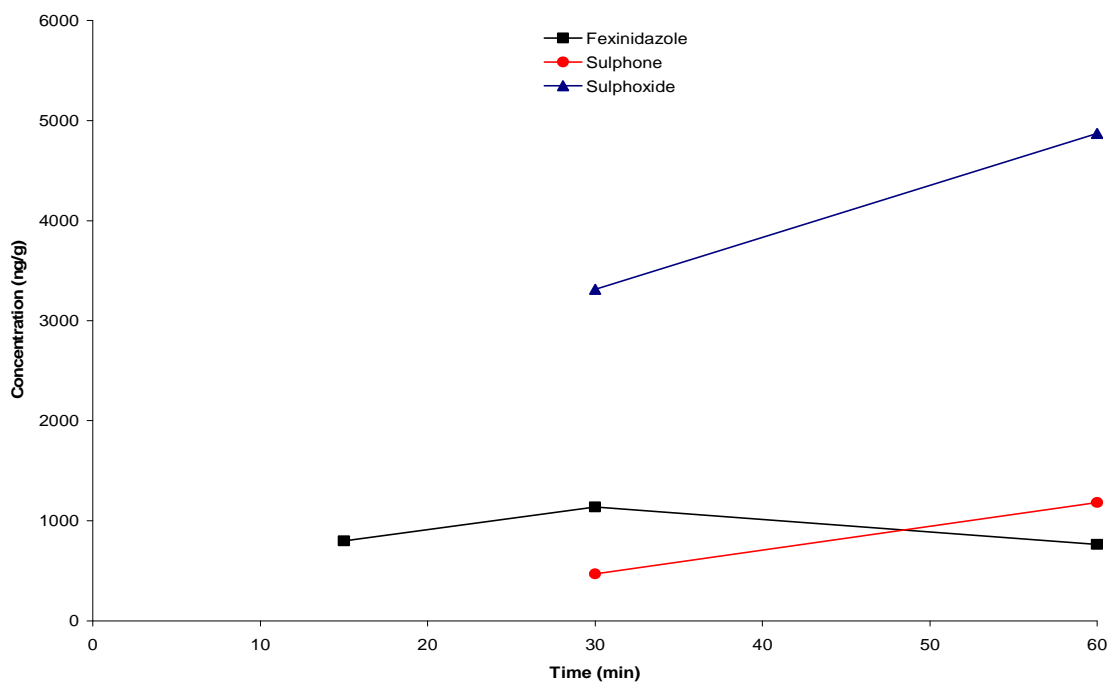

**Appendix 1      Animal body weights and dose volumes**

| <b>Group No.</b> | <b>Treatment</b>                 | <b>Animal ID</b> | <b>Weight (g)</b> | <b>Dose Vol. (mL)</b> |
|------------------|----------------------------------|------------------|-------------------|-----------------------|
| <b>1</b>         | <b>Fexinidazole 1 mg/kg i.v.</b> | 103              | 23                | 0.23                  |
|                  |                                  | 104              | 22                | 0.22                  |
|                  |                                  | 105              | 25                | 0.25                  |
|                  |                                  | 106              | 31                | 0.31                  |
|                  |                                  | 107              | 27                | 0.27                  |
|                  |                                  | 108              | 30                | 0.30                  |
|                  |                                  | 109              | 31                | 0.31                  |
|                  |                                  | 110              | 30                | 0.30                  |
|                  |                                  | 111              | 25                | 0.25                  |
|                  |                                  | 112              | 31                | 0.31                  |
|                  |                                  | 113              | 26                | 0.26                  |
|                  |                                  | 114              | 36                | 0.36                  |
|                  |                                  | 115              | 34                | 0.34                  |
|                  |                                  | 116              | 25                | 0.25                  |
|                  |                                  | 117              | 35                | 0.35                  |
|                  |                                  | 118              | 20                | 0.20                  |
|                  |                                  | 119              | 25                | 0.25                  |
|                  |                                  | 120              | 24                | 0.24                  |
|                  |                                  | 121              | 31                | 0.31                  |
|                  |                                  | 122              | 27                | 0.27                  |
|                  |                                  | 123              | 31                | 0.31                  |
|                  |                                  | 124              | 26                | 0.26                  |
|                  |                                  | 125              | 20                | 0.20                  |
|                  |                                  | 126              | 22                | 0.22                  |

## Appendix 1 cont.

| Group No. | Treatment                  | Animal ID | Weight (g) | Dose Vol. (mL) |
|-----------|----------------------------|-----------|------------|----------------|
| 2         | Fexinidazole 25 mg/kg p.o. | 127       | 29         | 0.29           |
|           |                            | 128       | 31         | 0.31           |
|           |                            | 129       | 28         | 0.28           |
|           |                            | 130       | 34         | 0.34           |
|           |                            | 131       | 26         | 0.26           |
|           |                            | 132       | 31         | 0.31           |
|           |                            | 133       | 33         | 0.33           |
|           |                            | 134       | 31         | 0.31           |
|           |                            | 135       | 29         | 0.29           |
|           |                            | 136       | 28         | 0.28           |
|           |                            | 137       | 30         | 0.30           |
|           |                            | 138       | 32         | 0.32           |
|           |                            | 139       | 27         | 0.27           |
|           |                            | 140       | 31         | 0.31           |
|           |                            | 141       | 38         | 0.38           |
|           |                            | 142       | 31         | 0.31           |
|           |                            | 143       | 28         | 0.28           |
|           |                            | 144       | 30         | 0.30           |
|           |                            | 145       | 25         | 0.25           |
|           |                            | 146       | 23         | 0.23           |
|           |                            | 147       | 23         | 0.23           |
|           |                            | 148       | 29         | 0.29           |
|           |                            | 149       | 31         | 0.31           |
|           |                            | 150       | 25         | 0.25           |
