# Supplementary material for: Fexinidazole – A New Oral Nitroimidazole Drug Candidate Entering Clinical Development for the Treatment of Sleeping Sickness
Source: PLoS Negl Trop Dis. 2010 Dec 21;4(12):e923. doi: 10.1371/journal.pntd.0000923 (PMC3006138; doi:10.1371/journal.pntd.0000923)
Supplement: Dataset S19 — (0.41 MB PDF) [file pntd.0000923.s020.pdf]

# Final Report

|                      |                                                                                                      |
|----------------------|------------------------------------------------------------------------------------------------------|
| Study Title          | Induction of micronuclei in cultured human peripheral blood lymphocytes                              |
| Test Article         | Fexinidazole                                                                                         |
| Author               |                                                                                                      |
| Sponsor              | Drugs for Neglected Diseases Institute (DNDi)<br>1 place Saint Gervais<br>1201 Geneva<br>SWITZERLAND |
| Study Monitor        |                                                                                                      |
| Test Facility        | Covance Laboratories Ltd                                                                             |
| Covance Study Number | 2647/22                                                                                              |
| Report Issued        | June 2008                                                                                            |
| Page Number          | 1 of 41                                                                                              |

## CONTENTS

|                                                                                                                    |    |
|--------------------------------------------------------------------------------------------------------------------|----|
| STUDY DIRECTOR AUTHENTICATION AND GLP COMPLIANCE STATEMENT .....                                                   | 2  |
| QUALITY ASSURANCE STATEMENT .....                                                                                  | 3  |
| RESPONSIBLE AND REVIEWING SCIENTISTS' STATEMENTS .....                                                             | 4  |
| RESPONSIBLE PERSONNEL .....                                                                                        | 5  |
| ARCHIVE STATEMENT .....                                                                                            | 6  |
| CONTENTS .....                                                                                                     | 7  |
| SUMMARY .....                                                                                                      | 8  |
| INTRODUCTION .....                                                                                                 | 11 |
| MATERIALS .....                                                                                                    | 13 |
| Test article .....                                                                                                 | 13 |
| Analysis of achieved concentration .....                                                                           | 14 |
| Controls .....                                                                                                     | 14 |
| Metabolic activation system .....                                                                                  | 14 |
| Blood cultures .....                                                                                               | 15 |
| METHODS .....                                                                                                      | 16 |
| Harvesting .....                                                                                                   | 17 |
| Slide preparation .....                                                                                            | 17 |
| Selection of concentrations for micronucleus analysis .....                                                        | 17 |
| Slide analysis .....                                                                                               | 19 |
| Analysis of results .....                                                                                          | 20 |
| RESULTS .....                                                                                                      | 22 |
| Micronucleus analysis .....                                                                                        | 24 |
| Analysis of achieved concentration .....                                                                           | 25 |
| CONCLUSION .....                                                                                                   | 26 |
| REFERENCES .....                                                                                                   | 27 |
| APPENDICES .....                                                                                                   | 30 |
| Appendix 1 Binucleate cells with micronuclei .....                                                                 | 30 |
| Appendix 2 Statistical analysis of test article data .....                                                         | 34 |
| Appendix 3 Historical vehicle control ranges for the human peripheral blood lymphocyte<br>micronucleus assay ..... | 36 |
| Appendix 4 Quality control statement for S-9 .....                                                                 | 38 |
| Appendix 5 Manufacturer's certificate of analysis .....                                                            | 39 |
| Appendix 6 Analytical determination of achieved concentrations .....                                               | 40 |
| Appendix 7 Minor deviations from protocol .....                                                                    | 41 |

## SUMMARY

Fexinidazole was tested in an *in vitro* micronucleus assay using duplicate human lymphocyte cultures prepared from the pooled blood of two female donors in two independent experiments. Treatments covering a broad range of concentrations, separated by narrow intervals, were performed both in the absence and presence of metabolic activation (S-9) from Aroclor 1254 induced animals. The test article was formulated in sterile anhydrous analytical grade dimethyl sulphoxide (DMSO) and the highest concentration used, 220.0 µg/mL, was selected in conjunction with the Study Monitor, based on a preliminary study (Covance Study Number 2647/4).

Treatments were conducted (as detailed in the following summary tables) either 24 or 48 hours following mitogen stimulation by Phytohaemagglutinin (PHA). The test article concentrations for micronucleus analysis were selected by evaluating the effect of Fexinidazole on the replication index (RI). In each experiment, micronuclei were analysed at three concentrations and a summary of the micronucleus data is presented in the following tables (Table 1 and Table 2):

**Table 1: Experiment 1 (24 hour PHA) – Results summary**

| Treatment       | Concentration (µg/mL) | Cytotoxicity (%) | Mean MNBN cell frequency (%) | Historical Control Range (%) <sup>#</sup> | Statistical significance |
|-----------------|-----------------------|------------------|------------------------------|-------------------------------------------|--------------------------|
| 20+28 hour -S-9 | Vehicle <sup>a</sup>  | -                | 0.75                         | 0.2-1.7                                   | -                        |
|                 | 20.00                 | 19               | 0.50                         |                                           | NS                       |
|                 | 40.00                 | 0                | 0.40                         |                                           | NS                       |
|                 | 80.00                 | 32♦              | 0.70                         |                                           | NS                       |
|                 | *NQO, 5.00            | ND               | 10.80                        |                                           | p ≤ 0.001                |
|                 | *Vinblastine, 0.08    | ND               | 3.20                         |                                           | p ≤ 0.001                |
| 3+45 hour +S-9  | Vehicle <sup>a</sup>  | -                | 0.40                         | 0.2-1.4                                   | -                        |
|                 | 80.00                 | 27               | 0.50                         |                                           | NS                       |
|                 | 140.0                 | 43               | 0.55                         |                                           | NS                       |
|                 | 180.0                 | 47♦              | 0.75                         |                                           | NS                       |
|                 | *CPA, 6.25            | ND               | 3.60                         |                                           | p ≤ 0.001                |
|                 |                       |                  |                              |                                           |                          |

♦ The highest concentrations selected were the maximum practicable concentrations limited by precipitation observed at the end of the treatment period

<sup>a</sup> Vehicle control was DMSO

\* Positive control

<sup>#</sup>95<sup>th</sup> percentile calculated range

NS = not significant

ND = not determined

**Table 2: Experiment 2 (48 hour PHA) – Results summary**

| Treatment       | Concentration<br>(µg/mL) | Cytotoxicity<br>(%) | Mean<br>MNBN cell<br>frequency<br>(%) | Historical<br>Control<br>Range (%) <sup>#</sup> | Statistical<br>significance |
|-----------------|--------------------------|---------------------|---------------------------------------|-------------------------------------------------|-----------------------------|
| 20+28 hour -S-9 | Vehicle <sup>a</sup>     | -                   | 1.05                                  | 0.0-1.0                                         | -                           |
|                 | 40.00                    | 4                   | 1.10                                  |                                                 | NS                          |
|                 | 80.00                    | 23                  | 0.60                                  |                                                 | NS                          |
|                 | 100.0                    | 29♦                 | 0.85                                  |                                                 | NS                          |
|                 | *NQO, 5.00               | ND                  | 8.95                                  |                                                 | p ≤ 0.001                   |
|                 | *Vinblastine, 0.06       | ND                  | 5.60                                  |                                                 | p ≤ 0.001                   |
| 3+45 hour +S-9  | Vehicle <sup>a</sup>     | -                   | 0.90                                  | 0.0-0.9                                         | -                           |
|                 | 80.00                    | 2                   | 0.60                                  |                                                 | NS                          |
|                 | 140.0                    | 13                  | 1.20                                  |                                                 | NS                          |
|                 | 180.0                    | 8♦                  | 0.35                                  |                                                 | NS                          |
|                 | *CPA, 6.25               | ND                  | 12.85                                 |                                                 | p ≤ 0.001                   |

♦ The highest concentrations selected were the maximum practicable concentrations limited by precipitation observed at the end of the treatment period

<sup>a</sup> Vehicle control was DMSO

\* Positive control

<sup>#</sup>95<sup>th</sup> percentile calculated range

NS = not significant

ND = not determined

Appropriate negative (vehicle) control cultures were included in the test system in both experiments under each treatment condition. The proportion of micronucleated binucleate cells (MNBN) in these cultures fell within or very close to current historical vehicle control (normal) ranges. 4-Nitroquinoline 1-oxide (NQO) and Vinblastine (VIN) were employed as clastogenic and aneugenic positive control chemicals respectively in the absence of rat liver S-9. Cyclophosphamide (CPA) was employed as a clastogenic positive control chemical in the presence of rat liver S-9. Cells receiving these were sampled in each experiment at 48 hours after the start of treatment; all compounds induced statistically significant increases in the proportion of cells with micronuclei.

Treatment of cells with Fexinidazole in the absence and presence of metabolic activation (S-9) in both experiments resulted in frequencies of MNBN which were similar to and not significantly ( $p \leq 0.05$ ) different from those observed in concurrent vehicle controls for all concentrations analysed. The MNBN cell frequency of Fexinidazole treated cultures generally fell within the 95<sup>th</sup> percentile of the normal range, with the exception of single cultures in Experiment 2 at the lowest concentration analysed (40.00 µg/mL) in the absence of S-9 and at the intermediate concentration (140.0 µg/mL) in the presence of S-9. As the effect was observed only in single cultures in one experiment, there was no evidence of reproducibility within

or between experiments and the study plan criteria for a positive result were not fulfilled. These observations were therefore not considered biologically relevant.

Samples of the highest Fexinidazole concentration (22.00 mg/mL) were analysed to determine achieved concentration (Experiment 2 only). The achieved concentration was higher than the nominal 22.00 mg/mL (115, 115, 114% of nominal for the three runs performed). As these values exceed the 100+/-10% acceptance criteria, the reserve sample was analysed. The values for the reserve sample were 88 and 88% of nominal (there was insufficient sample for a third run). However, as the achieved concentrations were only marginally outside the +/-10% range on each occasion and the highest concentration for analysis was limited by precipitation observed at the end of the treatment period, these values were considered acceptable and it is considered that this had no impact upon the validity of the study in any way.

It is concluded that Fexinidazole did not induce micronuclei in cultured human peripheral blood lymphocytes when tested under two different experimental conditions up to the maximum practicable concentration (limited by solubility in culture medium), in both the absence and presence of S-9.

## INTRODUCTION

Chromosome defects are recognised as the basis of a number of human genetic diseases [1]. There is a large database on the use of chromosomal assays for screening purposes ([2], [3], [4]). The use of human peripheral blood lymphocytes is recommended because the cells are only used in short-term culture and maintain a stable karyotype [5]. Experiments with these cells can also be performed in conjunction with a rat liver metabolising system (S-9) since, for short incubation periods, no toxicity is induced by the liver homogenate itself.

An alternative to measuring structural aberrations in mitotic cells is to measure micronuclei. These are produced from whole chromosomes or acentric fragments that are unable to attach to the spindle at mitosis and appear during the next interphase as small darkly staining bodies adjacent to the main daughter nucleus. Cytochalasin B, if added to cultures, inhibits cytokinesis (cell division) but not karyokinesis (nuclear division) resulting in the formation of binucleate cells [6]. If micronuclei are counted in binucleate cells, then a measurement of micronucleus induction resulting from cell division can be obtained.

*In-vitro* micronucleus assays in human peripheral blood lymphocytes have been used extensively at Covance and historical vehicle control data have been accumulated for male and female donors.

In the first instance, cells were exposed to the test article for 20 hours in the absence of S-9 (from rats induced with Aroclor) and for 3 hours in the presence of S-9. The test chemical was added 24 hours following culture initiation and cells were harvested at 72 hours.

Clear positive responses in Experiment 1 were to be discussed with the Sponsor and may not have necessitated further testing in Experiment 2. Negative or equivocal results in Experiment 1 were to be followed by further testing in a second experiment. In this study, a second experiment was performed in which cells were treated at 48 hours following culture initiation and harvested at 96 hours. Again, treatment in the absence of S-9 was for 20 hours and in the presence of S-9 for 3 hours.

The objective of this study was to evaluate the clastogenic and aneugenic potential of Fexinidazole by examining its effects on the frequency of micronuclei in cultured human peripheral blood lymphocytes treated in the absence and presence of S-9.

The test methodology is based on the recommendations of the International Workshop on Genotoxicity Testing [7], draft OECD guideline [8] and accepted scientific/regulatory principles described in current guidelines for clastogenicity testing *in vitro* ([3], [4], [9], [10], [11], [12], [13], [14], [15], [16]).

This study was performed according to the protocol and one amendment with the exception of the minor deviations detailed in Appendix 7, none of which in any way prejudiced the validity of the study.

The study was initiated on 22 January 2008. Experimental work started on 22 January 2008 and was completed on 25 February 2008. The study completion date is considered to be the date the Study Director signs the final report.

## MATERIALS

### Test article

Fexinidazole, batch number 3168-07-01/O (see minor deviations from protocol, Appendix 7), was a yellow powder. It was received on 21 January 2008 and stored at room temperature in the dark. Purity was stated as 100.2% and the expiry date was given as October 2008. The Manufacturer's certificate of analysis, provided by the Sponsor, is presented in Appendix 5. The test article information and certificate of analysis provided by the Sponsor are considered an adequate description of the characterisation, purity and stability of the test article. Determinations of stability and characteristics of the test article were the responsibility of the Sponsor.

Preliminary solubility data (taken from a previous study, CLE Study Number 2647/4) indicated that Fexinidazole was soluble in sterile anhydrous analytical grade dimethyl sulphoxide (DMSO) at concentrations up to approximately 276.2 mg/mL. The solubility limit in culture medium was in the range of 172.6 to 345.3 µg/mL, as indicated by precipitation at the higher concentration which persisted for at least 20 hours after test article addition. The highest concentration used in this study, 220.0 µg/mL, was selected in conjunction with the Study Monitor, based on Covance Study Number 2647/4.

Test article stock solutions were prepared by formulating Fexinidazole under yellow light conditions in DMSO, with the aid of vortex mixing and warming at 37°C, to give the maximum concentrations as specified in Table 3. Subsequent dilutions were made using DMSO. The test article solutions were protected from light and used within approximately 4 hours of initial formulation as follows:

**Table 3: Fexinidazole Concentration Ranges Tested**

| Experiment | Treatment                   | Concentration range (mg/mL) |    |       | Final concentration range (µg/mL) |    |       |
|------------|-----------------------------|-----------------------------|----|-------|-----------------------------------|----|-------|
| 1 and 2    | 20+28, -S-9,<br>24 hour PHA | 2.000                       | to | 10.00 | 20.00                             | to | 100.0 |
|            | 3+45, +S-9,<br>24 hour PHA  | 8.000                       | to | 22.00 | 80.00                             | to | 220.0 |

### Analysis of achieved concentration

Duplicate samples of the highest test article formulation (22.00 mg/mL) and vehicle control taken from Experiment 2 were retained for analysis of achieved concentration. Samples were analysed as soon as possible on the day of formulation by Covance Laboratories Ltd. The analytical methods used and results obtained are presented in Appendix 6.

### Controls

Sterile DMSO was added to cultures designated as negative controls as described in the methods section of this report.

**Table 4: Positive Controls**

| Chemical**                        | Stock concentration<br>(mg/mL)* | Final concentration<br>(µg/mL) | S-9    |
|-----------------------------------|---------------------------------|--------------------------------|--------|
| 4-Nitroquinoline 1-oxide<br>(NQO) | 0.250<br>0.500                  | 2.50<br>5.00                   | -<br>- |
| Cyclophosphamide<br>(CPA)         | 0.625<br>1.25                   | 6.25<br>12.5                   | +<br>+ |
| Vinblastine<br>(VIN)              | 0.006<br>0.008                  | 0.06<br>0.08                   | -<br>- |

\* The positive control chemicals, CPA and NQO were dissolved in DMSO, frozen (-80°C nominal) and thawed immediately prior to use. Vinblastine (VIN) was dissolved in purified water immediately prior to use.

\*\* Obtained from Sigma-Aldrich Chemical Co, Poole, UK.

### Metabolic activation system

The mammalian liver post-mitochondrial fraction (S-9) used for metabolic activation was obtained from Molecular Toxicology Incorporated, USA where it is prepared from male Sprague Dawley rats induced with Aroclor 1254. The batches of MolTox™ S-9 were stored frozen in aliquots at -80°C nominal prior to use. Each batch was checked by the manufacturer for sterility, protein content, ability to convert known promutagens to bacterial mutagens and cytochrome P-450-catalyzed enzyme activities (alkoxyresorufin-O-dealkylase activities). The quality control statement, relating to the batch of S-9 preparation used, is included in Appendix 4 of this report.

The S-9 mix was prepared in the following way:

Glucose-6-phosphate (180 mg/mL), β-Nicotinamide adenine dinucleotide phosphate (NADP) (25 mg/mL), Potassium chloride (KCl) (150 mM) and rat liver S-9 were mixed in the ratio 1:1:1:2. For all cultures treated in the presence of S-9, an aliquot of

the mix was added to each cell culture to achieve the required final concentration of test article in a total of 10 mL. The final concentration of the liver homogenate in the test system was 2%.

Cultures treated in the absence of S-9 received an equivalent volume of KCl (150 mM).

### Blood cultures

Blood from two healthy, non-smoking female volunteers was used for each experiment in this study:

**Table 5: Blood Cultures**

| Experiment | Donor Sex | Donor Age (years) | Donor Identity |
|------------|-----------|-------------------|----------------|
| 1          | Female    | 26, 28            | 7619, 9679     |
| 2          | Female    | 25, 35            | 7069, 7811     |

No volunteer was suspected of any virus infection or exposed to high levels of radiation or hazardous chemicals. The measured cell cycle time of the donors used at Covance falls within the range 13 +/- 1.5 hours. For each experiment, an appropriate volume of whole blood was drawn from the peripheral circulation into heparinised tubes within two days of to culture initiation. Blood was stored refrigerated and pooled using equal volumes from each donor prior to use.

Whole blood cultures were established in sterile disposable centrifuge tubes by placing 0.4 mL of pooled heparinised blood into 9.0 mL HEPES-buffered RPMI medium containing 20% (v/v) heat inactivated foetal calf serum and 50 µg/mL gentamycin, so that the final volume following addition of S-9 mix/KCl and the test article in its chosen vehicle is 10 mL. The mitogen Phytohaemagglutinin (PHA, reagent grade) was included in the culture medium at a concentration of approximately 2% of culture to stimulate the lymphocytes to divide. Blood cultures were incubated at 37°C±1°C and rocked continuously.

For treatments conducted as part of Experiment 1, blood cultures were incubated in the presence of PHA for approximately 24 hours prior to treatment.

For treatments conducted as part of Experiment 2, blood cultures were incubated in the presence of PHA for approximately 48 hours prior to treatment.

## METHODS

The test system was suitably labelled (using a colour-coded procedure) to clearly identify the study number, experiment number, treatment time, test article concentration (if applicable), positive and negative controls.

S-9 mix or KCl (0.5 mL per culture) was added appropriately. Cultures were treated with the test article or controls (0.1 mL per culture) as indicated in the following table. The final culture volume was 10 mL. Cultures were incubated at  $37^{\circ}\text{C} \pm 1^{\circ}\text{C}$  for the designated exposure time.

This scheme is illustrated as follows:

**Table 6: Treatment Scheme**

| Treatment         | S-9 | Number of cultures |                | Experiment 2 |                |
|-------------------|-----|--------------------|----------------|--------------|----------------|
|                   |     | Experiment 1       |                |              |                |
|                   |     | 3+45*              | 20+28*         | 3+45*        | 20+28*         |
| Negative control  | -   |                    | 4              |              | 4              |
|                   | +   | 4                  |                | 4            |                |
| Test article      | -   |                    | 2              |              | 2              |
|                   | +   | 2                  |                | 2            |                |
| Positive controls | -   |                    | 2 <sup>#</sup> |              | 2 <sup>#</sup> |
|                   | +   | 2                  |                | 2            |                |

\* Hours treatment + hours recovery

<sup>#</sup> Two cultures for each positive control.

For removal of the test chemical, cells were pelleted (approximately 300 g, 10 minutes), washed twice with sterile saline (pre-warmed to approximately  $37^{\circ}\text{C}$ ), and resuspended in fresh pre-warmed medium containing foetal calf serum and gentamycin (see minor deviations from protocol, Appendix 7). At the appropriate times, Cytochalasin B, formulated in DMSO, was either added directly (0.1 mL/culture) or added to post wash-off culture medium to give a final concentration of 6  $\mu\text{g/mL}$  per culture.

**Table 7: Summary of treatment conditions**

| Duration of treatment (hours) | S-9 | Hours after culture initiation |                          |                            | Harvest time |
|-------------------------------|-----|--------------------------------|--------------------------|----------------------------|--------------|
|                               |     | Addition of test chemical      | Removal of test chemical | Addition of Cytochalasin B |              |
| 20                            | -   | 24                             | 44                       | 45*                        | 72           |
| 20                            | -   | 48                             | 68                       | 69*                        | 96           |
| 3                             | +   | 24                             | 27                       | 45*                        | 72           |
| 3                             | +   | 48                             | 51                       | 69*                        | 96           |

\* Approximate times

Changes in osmolality of more than 50 mOsm/kg and fluctuations in pH of more than one unit may be responsible for an increase in chromosome aberrations ([17], [18]). Osmolality and pH measurements on post-treatment incubation medium were taken in Experiment 1.

### Harvesting

At the defined sampling time, cultures were centrifuged at approximately 300 g for 10 minutes, the supernatant removed and discarded and cells resuspended in 4 mL (hypotonic) 0.075 M KCl at 37°C for 4 minutes to allow cell swelling to occur. Cells were then fixed by dropping the KCl suspension into fresh, cold methanol/glacial acetic acid (3:1, v/v). The fixative was changed by centrifugation (approximately 300 g, 10 minutes) and resuspension. This procedure was repeated as necessary (centrifuging at approximately 1250 g, 2-3 minutes) until the cell pellets were clean.

### Slide preparation

Lymphocytes were kept in fixative at 1-10°C before slides were prepared but slides were not made on the day of harvest to ensure cells were adequately fixed. Cells were centrifuged and resuspended in a minimal amount of fresh fixative (if required) to give a milky suspension. Several drops of suspension were gently spread onto multiple clean, dry microscope slides. After the slides had dried the cells were stained for 5 minutes in filtered 4% (v/v) Giemsa in pH 6.8 buffer. The slides were rinsed, dried and mounted with coverslips.

### Selection of concentrations for micronucleus analysis

Slides were examined, uncoded, for proportions of mono-, bi- and multinucleate cells to a minimum of 500 cells per culture.

The Replication Index (RI), which indicates the relative number of nuclei compared to controls, was determined using the formulae below:

$$RI = \frac{\text{number binucleate cells} + 2(\text{number multinucleate cells})}{\text{total number of cells in treated cultures}}$$

Relative RI (expressed in terms of percentage) for each treated culture was calculated as follows:

$$\text{Relative RI (\%)} = \frac{\text{RI of treated cultures}}{\text{RI of vehicle controls}} \times 100$$

Cytotoxicity (%) is expressed as (100 – Relative RI).

A selection of random fields was observed from enough treatments to determine whether chemically induced cell cycle delay or cytotoxicity has occurred.

The highest concentration for micronucleus analysis was to be one at which at least 60% (approximately) reduction in RI had occurred or should be the highest concentration tested.

In this study, the highest concentrations selected for analysis were the maximum practicable concentrations based on precipitation observed at the end of the treatment period. Slides from precipitating cultures were checked to confirm that the presence of precipitate did not preclude analysis. Slides from the highest selected concentration and two lower concentrations were taken for microscopic analysis.

The rationale for the limit of approximately 60% cytotoxicity is based on limited data (discussed by the IWGTP [7]) which show that in some cases (i.e. some aneugens), a very steep toxicity curve is observed and very closely spaced concentrations in the range of 50-60% toxicity need to be evaluated. Data from certain validation experiments have demonstrated that the lowest observed effective dose (LOEDs) for the aneugens diethylstilbestrol and vincristine showed a relative cell count (RCC) of 42% and 43% respectively; this corresponding to a toxicity of approximately 60%. These compounds might not have been found to be micronucleus inducers if they had not been tested up to the 60% toxicity level.

For each treatment regime, two vehicle control cultures were analysed for micronuclei. Positive control concentrations, which gave satisfactory responses in terms of quality and quantity of binucleated cells and numbers of micronuclei, were analysed.

### **Slide analysis**

Slides from the CPA, NQO and Vinblastine positive control treatments were checked to ensure that the system had operated satisfactorily. All slides for analysis were coded, using randomly generated letters, by an individual not connected with the scoring of the slides. Labels with only the study number, experiment number, the sex of the donor and the code were used to cover treatment details on the slides.

One thousand binucleate cells from each culture (2000 per concentration) were analysed for micronuclei. The number of cells containing micronuclei and the number of micronuclei per cell on each slide was noted. Observations were recorded on raw data sheets. The microscope stage co-ordinates of the first six micronucleated cells were recorded.

Binucleate cells were only included in the analysis if all of the following criteria were met:

- 1) The cytoplasm remained essentially intact, and
- 2) The daughter nuclei were of approximately equal size.

A micronucleus was only recorded if it met the following criteria:

- 1) The micronucleus has the same staining characteristics and a similar morphology to the main nuclei, and
- 2) Any micronucleus present was separate in the cytoplasm or only just touching a main nucleus, and
- 3) micronuclei were smooth edged and smaller than approximately one third the diameter of the main nuclei.

Slide analysis was performed by competent analysts trained in the applicable Covance Laboratories Harrogate (CLEH) standard operating procedures. The analysts were physically located remote from the CLEH facility, but were subject to CLEH management and GLP control systems (including QA inspection). All slides and raw data generated by the remote analysts were returned to CLEH for archiving on completion of analysis.

## **Analysis of results**

### **Treatment of data**

After completion of scoring and decoding of slides, the numbers of binucleate cells with micronuclei (MNBN cells) in each culture were obtained.

The proportions of MNBN cells in each replicate were used to establish acceptable heterogeneity between replicates by means of a binomial dispersion test [19].

The proportion of MNBN cells for each treatment condition were compared with the proportion in negative controls by using Fisher's exact test [19]. Probability values of  $p \leq 0.05$  were accepted as significant. Additionally, the number of micronuclei per binucleate cell were obtained and recorded.

### **Acceptance criteria**

The assay was to be considered valid if the following criteria were met:

1. The binomial dispersion test demonstrated acceptable heterogeneity (in terms of MNBN cell frequency) between replicate cultures, particularly where no positive responses were seen
2. The frequency of MNBN cells in negative controls fell within the normal ranges
3. The positive control chemicals induced statistically significant increases in the proportion of MNBN cells
4. A minimum of 50% of cells had gone through at least one cell division (as measured by binucleate + multinucleate cell counts) in negative control cultures at the time of harvest.

### **Evaluation criteria**

For valid data, the test article was considered to induce clastogenic and/or aneugenic events if:

1. A statistically significant increase in the frequency of MNBN cells at one or more concentrations was observed

2. An incidence of MNBN cells at such a concentration that exceeded the normal range in both replicates was observed
3. A concentration-related increase in the proportion of MNBN cells was observed.

The test article was considered as positive in this assay if all of the above criteria were met.

The test article was considered as negative in this assay if none of the above criteria were met.

Results which only partially satisfied the above criteria were dealt with on a case-by-case basis. Evidence of a concentration-related effect was considered useful but not essential in the evaluation of a positive result [20]. Biological relevance was taken into account, for example consistency of response within and between concentrations and (where applicable) between experiments, or effects occurring only at high or very toxic concentrations.

## RESULTS

The results of the RI determinations from Experiment 1 were as follows:

**Table 8: Data for 20+28 hour treatments -S-9, 24 hour PHA, female donors**

| Dose<br>(µg/mL) | Replicate | Mono       | Bi         | Multi      | Total<br>Number of<br>Cells | RI          | Cytotoxicity<br>(%) |
|-----------------|-----------|------------|------------|------------|-----------------------------|-------------|---------------------|
| Vehicle         | A         | 204        | 218        | 78         | 500                         | 0.75        | -                   |
|                 | B         | 227        | 187        | 86         | 500                         | 0.72        |                     |
|                 | C         | 204        | 224        | 72         | 500                         | 0.74        |                     |
|                 | D         | 160        | 221        | 119        | 500                         | 0.92        |                     |
| <b>20.00</b>    | <b>A</b>  | <b>262</b> | <b>168</b> | <b>70</b>  | <b>500</b>                  | <b>0.62</b> | <b>19#</b>          |
|                 | <b>B</b>  | <b>244</b> | <b>189</b> | <b>67</b>  | <b>500</b>                  | <b>0.65</b> |                     |
| <b>40.00</b>    | <b>A</b>  | <b>140</b> | <b>280</b> | <b>80</b>  | <b>500</b>                  | <b>0.88</b> | <b>0#</b>           |
|                 | <b>B</b>  | <b>146</b> | <b>199</b> | <b>155</b> | <b>500</b>                  | <b>1.02</b> |                     |
| <b>80.00</b>    | <b>A</b>  | <b>288</b> | <b>194</b> | <b>18</b>  | <b>500</b>                  | <b>0.46</b> | <b>32#PEH♦</b>      |
|                 | <b>B</b>  | <b>248</b> | <b>207</b> | <b>45</b>  | <b>500</b>                  | <b>0.59</b> |                     |
| 100.0           | A         | 269        | 188        | 43         | 500                         | 0.55        | 34PEH               |
|                 | B         | 286        | 184        | 30         | 500                         | 0.49        |                     |

P Indicates precipitation observed at the beginning of treatment  
E Indicates precipitation observed at the end of the treatment incubation period  
H Indicates precipitation observed at harvest

# = Highlighted concentrations were selected for analysis

♦ The highest concentration selected was the maximum practicable concentration limited by precipitation observed at the end of the treatment period

**Table 9: Data for 3+45 hour treatments +S-9, 24 hour PHA female donors**

| Dose<br>(µg/mL) | Replicate | Mono       | Bi         | Multi     | Total<br>Number of<br>Cells | RI          | Cytotoxicity<br>(%) |
|-----------------|-----------|------------|------------|-----------|-----------------------------|-------------|---------------------|
| Vehicle         | A         | 254        | 166        | 80        | 500                         | 0.65        | -                   |
|                 | B         | 250        | 173        | 77        | 500                         | 0.65        |                     |
|                 | C         | 177        | 218        | 105       | 500                         | 0.86        |                     |
|                 | D         | 180        | 217        | 103       | 500                         | 0.85        |                     |
| <b>80.00</b>    | <b>A</b>  | <b>282</b> | <b>172</b> | <b>46</b> | <b>500</b>                  | <b>0.53</b> | <b>27#P</b>         |
|                 | <b>B</b>  | <b>270</b> | <b>175</b> | <b>55</b> | <b>500</b>                  | <b>0.57</b> |                     |
| <b>140.0</b>    | <b>A</b>  | <b>322</b> | <b>137</b> | <b>41</b> | <b>500</b>                  | <b>0.44</b> | <b>43#P</b>         |
|                 | <b>B</b>  | <b>332</b> | <b>129</b> | <b>39</b> | <b>500</b>                  | <b>0.41</b> |                     |
| <b>180.0</b>    | <b>A</b>  | <b>342</b> | <b>138</b> | <b>20</b> | <b>500</b>                  | <b>0.36</b> | <b>47#PEH♦</b>      |
|                 | <b>B</b>  | <b>307</b> | <b>169</b> | <b>24</b> | <b>500</b>                  | <b>0.43</b> |                     |
| 220.0           | A         | 309        | 172        | 19        | 500                         | 0.42        | 48PEH               |
|                 | B         | 332        | 153        | 15        | 500                         | 0.37        |                     |

P Indicates precipitation observed at the beginning of treatment  
E Indicates precipitation observed at the end of the treatment incubation period  
H Indicates precipitation observed at harvest

# = Highlighted concentrations were selected for analysis

♦ The highest concentration selected was the maximum practicable concentration limited by precipitation observed at the end of the treatment period

The results of the RI determinations from Experiment 2 were as follows:

**Table 10: Data for 20+28 hour treatments -S-9, 48 hour PHA, female donors**

| Dose<br>(µg/mL) | Replicate | Mono       | Bi         | Multi      | Total<br>Number of<br>Cells | RI          | Cytotoxicity<br>(%) |
|-----------------|-----------|------------|------------|------------|-----------------------------|-------------|---------------------|
| Vehicle         | A         | 102        | 281        | 117        | 500                         | 1.03        | -                   |
|                 | B         | 97         | 293        | 110        | 500                         | 1.03        |                     |
|                 | C         | 104        | 263        | 133        | 500                         | 1.06        |                     |
|                 | D         | 106        | 270        | 124        | 500                         | 1.04        |                     |
| 20.00           | A         | 98         | 240        | 162        | 500                         | 1.13        | 0                   |
|                 | B         | 90         | 241        | 169        | 500                         | 1.16        |                     |
| <b>40.00</b>    | <b>A</b>  | <b>129</b> | <b>252</b> | <b>119</b> | <b>500</b>                  | <b>0.98</b> | <b>4#</b>           |
|                 | <b>B</b>  | <b>113</b> | <b>266</b> | <b>121</b> | <b>500</b>                  | <b>1.02</b> |                     |
| <b>80.00</b>    | <b>A</b>  | <b>174</b> | <b>264</b> | <b>62</b>  | <b>500</b>                  | <b>0.78</b> | <b>23#P</b>         |
|                 | <b>B</b>  | <b>160</b> | <b>271</b> | <b>69</b>  | <b>500</b>                  | <b>0.82</b> |                     |
| <b>100.0</b>    | <b>A</b>  | <b>178</b> | <b>283</b> | <b>39</b>  | <b>500</b>                  | <b>0.72</b> | <b>29#PEH♦</b>      |
|                 | <b>B</b>  | <b>165</b> | <b>291</b> | <b>44</b>  | <b>500</b>                  | <b>0.76</b> |                     |

P Indicates precipitation observed at the beginning of treatment

E Indicates precipitation observed at the end of the treatment incubation period

H Indicates precipitation observed at harvest

# = Highlighted concentrations were selected for analysis

♦ The highest concentration selected was the maximum practicable concentration limited by precipitation observed at the end of the treatment period

**Table 11: Data for 3+45 hour treatments +S-9, 48 hour PHA, female donors**

| Dose<br>(µg/mL) | Replicate | Mono       | Bi         | Multi      | Total<br>Number of<br>Cells | RI          | Cytotoxicity<br>(%) |
|-----------------|-----------|------------|------------|------------|-----------------------------|-------------|---------------------|
| Vehicle         | A         | 102        | 222        | 176        | 500                         | 1.15        | -                   |
|                 | B         | 100        | 226        | 174        | 500                         | 1.15        |                     |
|                 | C         | 94         | 244        | 162        | 500                         | 1.14        |                     |
|                 | D         | 82         | 229        | 189        | 500                         | 1.21        |                     |
| <b>80.00</b>    | <b>A</b>  | <b>106</b> | <b>215</b> | <b>179</b> | <b>500</b>                  | <b>1.15</b> | <b>2#P</b>          |
|                 | <b>B</b>  | <b>101</b> | <b>231</b> | <b>168</b> | <b>500</b>                  | <b>1.13</b> |                     |
| <b>140.0</b>    | <b>A</b>  | <b>141</b> | <b>219</b> | <b>140</b> | <b>500</b>                  | <b>1.00</b> | <b>13#PEH♦</b>      |
|                 | <b>B</b>  | <b>128</b> | <b>231</b> | <b>141</b> | <b>500</b>                  | <b>1.03</b> |                     |
| <b>180.0</b>    | <b>A</b>  | <b>111</b> | <b>227</b> | <b>162</b> | <b>500</b>                  | <b>1.10</b> | <b>8#PEH♦</b>       |
|                 | <b>B</b>  | <b>121</b> | <b>239</b> | <b>140</b> | <b>500</b>                  | <b>1.04</b> |                     |
| 220.0           | A         | 189        | 210        | 101        | 500                         | 0.82        | 25PEH               |
|                 | B         | 162        | 221        | 117        | 500                         | 0.91        |                     |

P Indicates precipitation observed at the beginning of treatment

E Indicates precipitation observed at the end of the treatment incubation period

H Indicates precipitation observed at harvest

# Highlighted concentrations were selected for analysis

♦ The highest concentration selected was the maximum practicable concentration limited by precipitation observed at the end of the treatment period. Although the two highest concentrations selected for analysis exhibited precipitation at the end of the treatment period, the slides were checked and it was confirmed that the presence of precipitation did not preclude analysis

No significant changes in osmolality or pH were observed at the highest concentrations tested as compared to the concurrent vehicle controls when measured in Experiment 1 (individual data not reported).

## **Micronucleus analysis**

### **Raw data**

The raw data for the observations on the test article plus positive and negative controls are retained by Covance Laboratories Limited. A summary of the number of cells containing micronuclei is given in Appendix 1.

### **Validity of study**

The data in Appendix 1, Appendix 2 and Appendix 3 indicate that:

- 1) The binomial dispersion test generally demonstrated acceptable heterogeneity (in terms of MNBN cell frequency) between replicate cultures (Appendix 2), with the exception of Experiment 1 in the absence of S-9, where sporadic differences between replicate cultures were observed. As all MNBN frequencies fell within the normal range, this was not considered to affect the integrity of the study in any way
- 2) The frequency of MNBN cells in the majority of vehicle controls fell within the normal range. The MNBN cell frequency of single vehicle control cultures in the absence and presence of S-9 in Experiment 2 marginally exceeded the normal range (Appendix 3). However, as these increases were small and the majority of test article treated cultures exhibited MNBN cell values similar or lower than observed in the concurrent vehicle controls, there was clearly no test article related effect. As such, the vehicle control data were accepted as valid
- 3) The positive control chemicals induced statistically significant increases in the proportion of MNBN cells (Appendix 1)
- 4) A minimum of 50% of cells had gone through at least one cell division (as measured by binucleate + multinucleate cell counts) in negative control cultures at the time of harvest.

### **Analysis of data**

Treatment of cells with Fexinidazole in the absence and presence of metabolic activation (S-9) in both experiments resulted in frequencies of MNBN which were

similar to and not significantly ( $p \leq 0.05$ ) different from those observed in concurrent vehicle controls for all concentrations analysed (Appendix 1 and Appendix 2). The MNBN cell frequency of Fexinidazole treated cultures generally fell within the 95<sup>th</sup> percentile of the normal range, with the exception of single cultures in Experiment 2 at the lowest concentration analysed (40.00 µg/mL) in the absence of S-9 and at the intermediate concentration (140.0 µg/mL) in the presence of S-9 (Appendix 3). As the effect was observed only in single cultures in one experiment, there was no evidence of reproducibility within or between experiments and the study plan criteria for a positive result were not fulfilled. These observations were therefore not considered biologically relevant.

#### **Analysis of achieved concentration**

Samples of the highest Fexinidazole concentration (22.00 mg/mL) were analysed to determine achieved concentration (Experiment 2 only). The results are presented in Appendix 6. The achieved concentration was higher than the nominal 22.00 mg/mL (115, 115, 114% of nominal for the three runs performed). As these values exceeded the 100+/-10% acceptance criteria, the reserve sample was analysed. The values for the reserve sample were 88 and 88% of nominal (there was insufficient sample for a third run). However, as the achieved concentrations were only marginally outside the +/-10% range on each occasion and the highest concentration for analysis is limited by precipitation observed at the end of the treatment period, these values were considered acceptable and it is considered that this had no impact upon the validity of the study in any way.

## **CONCLUSION**

It is concluded that Fexinidazole did not induce micronuclei in cultured human peripheral blood lymphocytes when tested under two different experimental conditions at concentrations up to the maximum practicable concentration (limited by solubility in culture medium), in both the absence and presence of S-9.

## REFERENCES

- 1 Mitelman F (1991) "Catalogue of Chromosome Aberrations in Cancer, 4th ed". New York: Wiley-Liss
- 2 Preston R J, Au W, Bender M A, Brewen J G, Carrano A V, Heddle J A, McFee A F, Wolff S and Wassom J S (1981) Mammalian *in vivo* and *in vitro* cytogenetic assays. A report of the U.S. EPA's Gene-Tox Program. Mutation Research 87, 143-188
- 3 Fenech M (1998) Important variables that influence base-line micronucleus frequency in cytokinesis-blocked lymphocytes – a biomarker for DNA damage in human populations. Mutation Research 404, 155-165
- 4 Fenech M, Bonassi S, Turner J, Lando C, Ceppi M, Chang W P, Holland N, Kirsch-Volders M, Zeiger E, Bigatti M P, Bolognesi C, Cao J, De Luca G, Di Giorgio M, Ferguson L R, Fucic A, Lima O G, Hadjidekova VV, Hrelia P, Jaworska A, Joksic G, Krishnaja A P, Lee T K, Martelli A, McKay M J, Migliore L, Mirkova E, Muller W U, Odagiri Y, Orsiere T, Scarfi M R, Silva M J, Sofuni T, Suralles J, Trenta G, Vorobtsova I, Vral A and Zijno A (2003) HUman MicroNucleus project. Intra- and inter-laboratory variation in the scoring of micronuclei and nucleoplasmic bridges in binucleated human lymphocytes. Results of an international slide-scoring exercise by the HUMN project. Mutation Research 534, 45-64
- 5 Evans H J and O'Riordan M L (1975) Human lymphocytes for analysis of chromosome aberrations in mutagen tests. Mutation Research 31, 135-148
- 6 Fenech M and Morley A A (1985) Measurement of micronuclei in human lymphocytes. Mutation Research 147, 29-36
- 7 Kirsch-Volders M, Sofuni T, Aardema M, Albertini S, Eastmond D, Fenech M, Ishidate M, Kirchener S, Lorge E, Morita T, Norppa H, Suralles J, Vanhauwaert A, Wakata A (2003) Report from the *in vitro* micronucleus assay working group. Mutation Research 540, 153-163
- 8 OECD (2004) 'Genetic Toxicology: OECD Guideline for the testing of chemicals. Draft proposal for a new Guideline 487: *In vitro* micronucleus test

- 9 Rosefort C, Fauth E and Zankl H (2004) Micronuclei induced by aneugens and clastogens in mononucleate and binucleate cells using the cytokinesis block assay. *Mutagenesis* 19, 277-284
- 10 Elhajouji A, Cunha M, Kirsch-Volders M (1998) Spindle poisons can induce polyploidy by mitotic slippage and micronucleate mononucleates in the cytokinesis-block assay. *Mutagenesis* 13, 193-198
- 11 Migliore L and Neri M (1991) Evaluation of twelve potential aneuploidogenic chemicals by the *in vitro* human lymphocyte micronucleus assay. *Toxicology In Vitro* 5, 325-336
- 12 Galloway S M, Aardema M J, Ishidate M, Ivett J L, Kirkland D J, Morita T, Mosesso P, Sofuni T (1994) Report from working group on *in vitro* tests for chromosomal aberrations. In: Sheila M. Galloway (Ed), Report of the International Workshop on Standardisation of Genotoxicity Test Procedures. *Mutation Research* 312, 241-261
- 13 Aardema M S, Albertini S, Arni P, Henderson L M, Kirsch-Volders M, Mackay J M, Sarrieff A M, Stringer D A and Taalman R D F (1998) Aneuploidy: a report of an ECETOC task force. *Mutation Research* 410, 3-79
- 14 Miller B, Potter-Locher F, Seelbach A, Stopper H, Utesch D and Madle S (1998) Evaluation of the *in vitro* micronucleus test as an alternative to the *in vitro* chromosomal aberration assay: position of the GUM working group on the *in vitro* micronucleus test. *Mutation Research* 410, 81-116
- 15 European Agency for the Evaluation of Medicinal Products (1995) ICH Topic S 2 A. Genotoxicity: Guidance on Specific Aspects of Genotoxicity Tests for Pharmaceuticals. ICH Harmonised Tripartite Guideline
- 16 Fenech M, Holland N, Chang W P, Zeiger E, Bonassi S (1999) The HUMAN MicroNucleus project: an international collaborative study on the use of the micronucleus technique for measuring DNA damage in humans. *Mutation Research* 428, 271-283

- 17 Scott D, Galloway S M, Marshall R R, Ishidate M, Brusick D, Ashby J and Myhr B C (1991) Genotoxicity under extreme culture conditions. A report from ICPEMC Task Group 9. *Mutation Research* 257, 147-204
- 18 Brusick D (1986) Genotoxic effects in cultured mammalian cells produced by low pH treatment conditions and increased ion concentrations. *Environ Mutagenesis* 8, 879-886
- 19 Richardson C, Williams D A, Allen J A, Amphlett G, Chanter D O and Phillips B (1989) Analysis of data from *in vitro* cytogenetic assays. In "Statistical Evaluation of Mutagenicity Test Data", (UKEMS Guidelines Sub-committee Report, Part III), Ed D J Kirkland, Cambridge University Press, pp 141-154
- 20 Scott D, Dean B J, Danford N D Kirkland D J (1990) Metaphase chromosome aberration assays *in vitro*. Basic Mutagenicity Tests; UKEMS recommended procedures. Ed. Kirkland D J.

## APPENDICES

### Appendix 1 Binucleate cells with micronuclei

**Table 12: Fexinidazole, 20+28 hour treatments in the absence of S-9  
Experiment 1 - 24 hour PHA, female donors**

| Treatment<br>(µg/mL) | Replicate | Total BN<br>Cells Scored | Total MNBN<br>Cells Scored | Frequency of<br>MNBN Cells/<br>Cells Scored (%) | Significance<br>§ |
|----------------------|-----------|--------------------------|----------------------------|-------------------------------------------------|-------------------|
| Vehicle              | A         | 1000                     | 10                         | 1.00                                            | -                 |
|                      | B         | 1000                     | 5                          | 0.50                                            |                   |
|                      | Total     | 2000                     | 15                         | 0.75                                            |                   |
| 20.00                | A         | 1000                     | 2                          | 0.20                                            | NS                |
|                      | B         | 1000                     | 8                          | 0.80                                            |                   |
|                      | Total     | 2000                     | 10                         | 0.50                                            |                   |
| 40.00                | A         | 1000                     | 3                          | 0.30                                            | NS                |
|                      | B         | 1000                     | 5                          | 0.50                                            |                   |
|                      | Total     | 2000                     | 8                          | 0.40                                            |                   |
| 80.00                | A         | 1000                     | 10                         | 1.00                                            | NS                |
|                      | B         | 1000                     | 4                          | 0.40                                            |                   |
|                      | Total     | 2000                     | 14                         | 0.70                                            |                   |
| NQO, 5.00            | A         | 1000                     | 105                        | <b>10.50#</b>                                   | p ≤ 0.001         |
|                      | B         | 1000                     | 111                        | <b>11.10#</b>                                   |                   |
|                      | Total     | 2000                     | 216                        | 10.80                                           |                   |
| VIN, 0.08            | A         | 1000                     | 37                         | <b>3.70#</b>                                    | p ≤ 0.001         |
|                      | B         | 1000                     | 27                         | <b>2.70#</b>                                    |                   |
|                      | Total     | 2000                     | 64                         | 3.20                                            |                   |

§ Statistical significance (Appendix 2)

NS = not significant

# = Numbers highlighted exceed historical negative control range (Appendix 3)

**Table 13: Fexinidazole, 3+45 hour treatments in the presence of S-9**  
**Experiment 1- 24 hour PHA, female donors**

| Treatment<br>(µg/mL) | Replicate | Total BN<br>Cells Scored | Total MNBN<br>Cells Scored | Frequency of<br>MNBN Cells/<br>Cells Scored (%) | Significance<br>§ |
|----------------------|-----------|--------------------------|----------------------------|-------------------------------------------------|-------------------|
| Vehicle              | A         | 1000                     | 5                          | 0.50                                            | -                 |
|                      | B         | 1000                     | 3                          | 0.30                                            |                   |
|                      | Total     | 2000                     | 8                          | 0.40                                            |                   |
| 80.00                | A         | 1000                     | 7                          | 0.70                                            | NS                |
|                      | B         | 1000                     | 3                          | 0.30                                            |                   |
|                      | Total     | 2000                     | 10                         | 0.50                                            |                   |
| 140.0                | A         | 1000                     | 8                          | 0.80                                            | NS                |
|                      | B         | 1000                     | 3                          | 0.30                                            |                   |
|                      | Total     | 2000                     | 11                         | 0.55                                            |                   |
| 180.0                | A         | 1000                     | 11                         | 1.10                                            | NS                |
|                      | B         | 1000                     | 4                          | 0.40                                            |                   |
|                      | Total     | 2000                     | 15                         | 0.75                                            |                   |
| CPA, 6.25            | A         | 1000                     | 35                         | <b>3.50#</b>                                    | p ≤ 0.001         |
|                      | B         | 1000                     | 37                         | <b>3.70#</b>                                    |                   |
|                      | Total     | 2000                     | 72                         | 3.60                                            |                   |

§ Statistical significance (Appendix 2)

NS = not significant

# = Numbers highlighted exceed historical negative control range (Appendix 3)

**Table 14: Fexinidazole, 20+28 hour treatments in the absence of S-9  
Experiment 2- 48 hour PHA, female donors**

| Treatment<br>(µg/mL) | Replicate | Total BN<br>Cells Scored | Total MNBN<br>Cells Scored | Frequency of<br>MNBN Cells/<br>Cells Scored (%) | Significance<br>§ |
|----------------------|-----------|--------------------------|----------------------------|-------------------------------------------------|-------------------|
| Vehicle              | A         | 1000                     | 9                          | 0.90                                            | -                 |
|                      | B         | 1000                     | 12                         | <b>1.20#</b>                                    |                   |
|                      | Total     | 2000                     | 21                         | 1.05                                            |                   |
| 40.00                | A         | 1000                     | 12                         | <b>1.20#</b>                                    | NS                |
|                      | B         | 1000                     | 10                         | 1.00                                            |                   |
|                      | Total     | 2000                     | 22                         | 1.10                                            |                   |
| 80.00                | A         | 1000                     | 4                          | 0.4                                             | NS                |
|                      | B         | 1000                     | 8                          | 0.80                                            |                   |
|                      | Total     | 2000                     | 12                         | 0.60                                            |                   |
| 100.0                | A         | 1000                     | 9                          | 0.90                                            | NS                |
|                      | B         | 1000                     | 8                          | 0.80                                            |                   |
|                      | Total     | 2000                     | 17                         | 0.85                                            |                   |
| NQO, 5.00            | A         | 1000                     | 107                        | <b>10.70#</b>                                   | p ≤ 0.001         |
|                      | B         | 1000                     | 72                         | <b>7.20#</b>                                    |                   |
|                      | Total     | 2000                     | 179                        | 8.95                                            |                   |
| VIN, 0.06            | A         | 1000                     | 67                         | <b>6.70#</b>                                    | p ≤ 0.001         |
|                      | B         | 1000                     | 45                         | <b>4.50#</b>                                    |                   |
|                      | Total     | 2000                     | 112                        | 5.60                                            |                   |

§ Statistical significance (Appendix 2)

NS = not significant

# = Numbers highlighted exceed historical negative control range (Appendix 3)

**Table 15: Fexinidazole, 3+45 hour treatments in the presence of S-9  
Experiment 2- 48 hour PHA, female donors**

| Treatment<br>(µg/mL) | Replicate | Total BN<br>Cells Scored | Total MNBN<br>Cells Scored | Frequency of<br>MNBN Cells/<br>Cells Scored (%) | Significance<br>§ |
|----------------------|-----------|--------------------------|----------------------------|-------------------------------------------------|-------------------|
| Vehicle              | A         | 1000                     | 8                          | 0.80                                            | -                 |
|                      | B         | 1000                     | 10                         | <b>1.00#</b>                                    |                   |
|                      | Total     | 2000                     | 18                         | 0.90                                            |                   |
| 80.00                | A         | 1000                     | 9                          | 0.90                                            | NS                |
|                      | B         | 1000                     | 3                          | 0.30                                            |                   |
|                      | Total     | 2000                     | 12                         | 0.60                                            |                   |
| 140.0                | A         | 1000                     | 16                         | <b>1.60#</b>                                    | NS                |
|                      | B         | 1000                     | 8                          | 0.80                                            |                   |
|                      | Total     | 2000                     | 24                         | 1.20                                            |                   |
| 180.0                | A         | 1000                     | 4                          | 0.40                                            | NS                |
|                      | B         | 1000                     | 3                          | 0.30                                            |                   |
|                      | Total     | 2000                     | 7                          | 0.35                                            |                   |
| CPA, 6.25            | A         | 1000                     | 88                         | <b>8.80#</b>                                    | p ≤ 0.001         |
|                      | B         | 1000                     | 169                        | <b>16.90#</b>                                   |                   |
|                      | Total     | 2000                     | 257                        | 12.85                                           |                   |

§ Statistical significance (Appendix 2)

NS = not significant

# = Numbers highlighted exceed historical negative control range (Appendix 3)

## Appendix 2

### Statistical analysis of test article data

**Table 16: Fexinidazole, 20+28 hour treatments in the absence of S-9**  
**Experiment 1- 24 hour PHA, female donors**

|                                          |       |
|------------------------------------------|-------|
| Binomial Dispersion Test $\chi^2 = 8.39$ | DF: 4 |
| Significance: $p \leq 0.05$              |       |

| Treatment (µg/mL) | Total BN Cells | BN Cells with micronuclei | Proportion | Fisher's exact test | Significance   |
|-------------------|----------------|---------------------------|------------|---------------------|----------------|
| Vehicle           | 2000           | 15                        | 0.008      | -                   | -              |
| 20.00             | 2000           | 10                        | 0.005      | 0.837               | NS             |
| 40.00             | 2000           | 8                         | 0.004      | 0.925               | NS             |
| 80.00             | 2000           | 14                        | 0.007      | 0.572               | NS             |
| NQO, 5.00         | 2000           | 216                       | 0.108      | 0.000               | $p \leq 0.001$ |
| VIN, 0.08         | 2000           | 64                        | 0.032      | 0.000               | $p \leq 0.001$ |

**Table 17: Fexinidazole, 3+45 hour treatments in the presence of S-9**  
**Experiment 1- 24 hour PHA, female donors**

|                                          |       |
|------------------------------------------|-------|
| Binomial Dispersion Test $\chi^2 = 7.69$ | DF: 4 |
| Significance: NS                         |       |

| Treatment (µg/mL) | Total BN Cells | BN Cells with micronuclei | Proportion | Fisher's exact test | Significance   |
|-------------------|----------------|---------------------------|------------|---------------------|----------------|
| Vehicle           | 2000           | 8                         | 0.004      | -                   | -              |
| 80.00             | 2000           | 10                        | 0.005      | 0.323               | NS             |
| 140.0             | 2000           | 11                        | 0.006      | 0.251               | NS             |
| 180.0             | 2000           | 15                        | 0.008      | 0.075               | NS             |
| CPA, 6.25         | 2000           | 72                        | 0.036      | 0.000               | $p \leq 0.001$ |

NS = not significant

DF = degrees of freedom

BN = binucleate

**Table 18: Fexinidazole, 20+28 hour treatment in the absence of S-9  
Experiment 2- 48 hour PHA, female donors**

|                                          |       |
|------------------------------------------|-------|
| Binomial Dispersion Test $\chi^2 = 2.02$ | DF: 4 |
| Significance: NS                         |       |

| Treatment<br>( $\mu\text{g/mL}$ ) | Total BN Cells | BN Cells with<br>micronuclei | Proportion | Fisher's exact<br>test | Significance   |
|-----------------------------------|----------------|------------------------------|------------|------------------------|----------------|
| Vehicle                           | 2000           | 21                           | 0.011      | -                      | -              |
| 40.00                             | 2000           | 22                           | 0.011      | 0.440                  | NS             |
| 80.00                             | 2000           | 12                           | 0.006      | 0.940                  | NS             |
| 100.0                             | 2000           | 17                           | 0.009      | 0.740                  | NS             |
| NQO, 5.00                         | 2000           | 179                          | 0.090      | 0.000                  | $p \leq 0.001$ |
| VIN, 0.06                         | 2000           | 112                          | 0.056      | 0.000                  | $p \leq 0.001$ |

**Table 19: Fexinidazole, 3+45 hour treatment in the presence of S-9  
Experiment 2- 48 hour PHA, female donors**

|                                          |       |
|------------------------------------------|-------|
| Binomial Dispersion Test $\chi^2 = 6.08$ | DF: 4 |
| Significance: NS                         |       |

| Treatment<br>( $\mu\text{g/mL}$ ) | Total BN Cells | BN Cells with<br>micronuclei | Proportion | Fisher's exact<br>test | Significance   |
|-----------------------------------|----------------|------------------------------|------------|------------------------|----------------|
| Vehicle                           | 2000           | 18                           | 0.009      | -                      | -              |
| 80.00                             | 2000           | 12                           | 0.006      | 0.860                  | NS             |
| 140.0                             | 2000           | 24                           | 0.012      | 0.179                  | NS             |
| 180.0                             | 2000           | 7                            | 0.004      | 0.986                  | NS             |
| CPA, 6.25                         | 2000           | 257                          | 0.129      | 0.000                  | $p \leq 0.001$ |

NS = not significant

DF = degrees of freedom

BN = binucleate

### Appendix 3

#### Historical vehicle control ranges for the human peripheral blood lymphocyte micronucleus assay

**Table 20: 24 hour PHA**

|     |                            | Micronucleated binucleates observed<br>in 1000 binucleates scored |               |
|-----|----------------------------|-------------------------------------------------------------------|---------------|
|     |                            | Male donors                                                       | Female donors |
| -S9 | Number of cultures         | 74                                                                | 86            |
|     | Median                     | 4.00                                                              | 9.00          |
|     | Mean                       | 4.55                                                              | 9.26          |
|     | SD                         | 3.03                                                              | 3.97          |
|     | Observed range             | 0 – 16                                                            | 2 – 19        |
|     | <b>95% reference range</b> | <b>0 – 12</b>                                                     | <b>2 – 17</b> |
| +S9 | Number of cultures         | 72                                                                | 62            |
|     | Median                     | 3.00                                                              | 7.00          |
|     | Mean                       | 3.93                                                              | 6.92          |
|     | SD                         | 2.86                                                              | 3.37          |
|     | Observed range             | 0 – 12                                                            | 1 – 17        |
|     | <b>95% reference range</b> | <b>0 – 12</b>                                                     | <b>2 – 14</b> |

Reference ranges are calculated from percentiles of the observed distributions.

Calculated in August 2006 by CLEH Statistics, for studies started between January 2004 and May 2006.

**Table 21: 48 hour PHA**

|     |                            | Micronucleated binucleates observed<br>in 1000 binucleates scored |               |
|-----|----------------------------|-------------------------------------------------------------------|---------------|
|     |                            | Male donors                                                       | Female donors |
| -S9 | Number of cultures         | 82                                                                | 70            |
|     | Median                     | 4.00                                                              | 4.00          |
|     | Mean                       | 3.65                                                              | 4.26          |
|     | SD                         | 2.43                                                              | 2.56          |
|     | Observed range             | 0 – 13                                                            | 0 – 10        |
|     | <b>95% reference range</b> | <b>0 – 10</b>                                                     | <b>0 – 10</b> |
| +S9 | Number of cultures         | 70                                                                | 60            |
|     | Median                     | 3.00                                                              | 4.50          |
|     | Mean                       | 3.60                                                              | 4.50          |
|     | SD                         | 2.19                                                              | 2.70          |
|     | Observed range             | 0 – 11                                                            | 0 – 13        |
|     | <b>95% reference range</b> | <b>0 – 10</b>                                                     | <b>0 – 9</b>  |

Reference ranges are calculated from percentiles of the observed distributions.

Calculated in August 2006 by CLEH Statistics, for studies started between January 2004 and May 2006.

## Appendix 4 Quality control statement for S-9

### MOLTOX POST MITOCHONDRIAL SUPERNATANT (S-9) QUALITY CONTROL & PRODUCTION CERTIFICATE

|                                                                          |                               |                                         |
|--------------------------------------------------------------------------|-------------------------------|-----------------------------------------|
| LOT NO.: <u>2159</u>                                                     | SPECIES: <u>Rat</u>           | PREPARATION DATE: <u>June 27, 2007</u>  |
| PART NO.: <u>11-101</u>                                                  | STRAIN: <u>Sprague Dawley</u> | EXPIRATION DATE: <u>June 27, 2009</u>   |
| VOLUME: <u>5ml</u>                                                       | SEX: <u>Male</u>              | BUFFER: <u>0.154 M KCl</u>              |
|                                                                          | TISSUE: <u>Liver</u>          | INDUCING AGENT(s): <u>Aroclor 1254</u>  |
| REFERENCE: <u>Maron, D &amp; Ames, B, <i>Mutat Res</i> 113:173, 1983</u> |                               | <u>(Monsanto KL615), 500 mg/kg i.p.</u> |
| STORAGE: <u>At or below -70°C</u>                                        |                               |                                         |

#### BIOCHEMISTRY:

##### - PROTEIN

37.8 mg/ml

Assayed according to the method of Lowry et al., *JBC* 193:265, 1951 using bovine serum albumin as the standard.

##### - ALKOXYRESORUFIN-0-DEALKYLASE ACTIVITIES

| Activity | P450     | Fold -<br>Induction |
|----------|----------|---------------------|
| EROD     | 1A1, 1A2 | 61.0                |
| PROD     | 2B1      | 31.7                |
| BROD     | 2B1      | 12.0                |
| MROD     | 1A2      | 306.6               |

Assays for ethoxyresorufin-0-deethylase (EROD), pentoxy-, benzyl- and methoxyresorufin-0-dealkylases (PROD, BROD, & MROD) were conducted using a modification of the methods of Burke, et al., *Biochem Pharm* 34:3337, 1985. Fold-inductions were calculated as the ratio of the sample vs. uninduced specific activities (SA's). Control SA's (pmoles/min/mg protein) were 25.3, 14.3, 42.5, & 6.4 for EROD, PROD, BROD and MROD, respectively.

#### BIOASSAY:

##### - TEST FOR THE PRESENCE OF ADVENTITIOUS AGENTS

Samples of S-9 were assayed for the presence of contaminating microflora by plating 1.0 ml volumes on Nutrient Agar and Minimal Glucose (Vogel-Bonner E, supplemented with 0.05 mM L-histidine and D-biotin) media. Triplicate plates were read after 40 - 48 h incubation at 35 ± 2°C. The tested samples met acceptance criteria.

##### - PROMUTAGEN ACTIVATION

|                           |
|---------------------------|
| No. His+ Revertants       |
| <u>TA98</u> <u>TA1535</u> |
| 272        1914           |

The ability of the sample to activate ethidium (EtBr) EtBr/CPA and cyclophosphamide (CPA) to intermediates mutagenic to TA98 and TA1535, respectively, was determined according to Lesca, et al., *Mutation Res* 129:299, 1984. Data were expressed as revertants per µg EtBr or per mg CPA.

Dilutions of the sample S9, ranging from 0.2 - 10% in S9 mix, were tested for their ability to activate benzo(a)pyrene (BP) and 2-aminoanthracene (2-AA) to intermediates mutagenic to TA100. Assays were conducted using duplicate plates as described by Maron & Ames, (*Mutat Res* 113:173, 1983).

µl S9 per plate/number his<sup>+</sup> revertants per plate

| Promutagen    | 0   | 1   | 5    | 10   | 20   | 50   |
|---------------|-----|-----|------|------|------|------|
| BP (5 µg)     | 101 | 288 | 454  | 525  | 933  | 1186 |
| 2-AA (2.5 µg) | 137 | 547 | 2529 | 2643 | 2529 | 1582 |

#### MOLECULAR TOXICOLOGY, INC.

157 Industrial Park Dr.  
Boone, NC 28607  
(828) 264-9099

Approved: *Kristen E. ...* 7.9.07

### Manufacturer's certificate of analysis

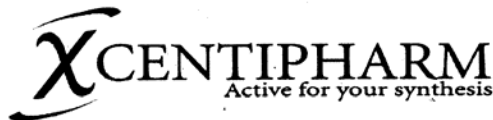

## ANALYSIS CERTIFICATE

**FEXINIDAZOLE**

Manufact. date    November-2007

|             |              |
|-------------|--------------|
| Expiry date | October-2008 |
|-------------|--------------|

DATE  
ANALYSIS N° CA  
BATCH CENTIPHARM  
SAMPLE N°  
WEIGHT (g)

January 15, 2008  
07327/01  
3168-07-01/O  
ECH:08015/51  
70

[illegible]

## CONFORMITY

**YES / ~~NO~~**

Grasse, 16/01/2008  
M.CONNAN  
Quality Control Manager

**AXYNTIS**  
Active for your emotions

**CENTIPHARM**

Chemin de la Madeleine - B.P. 45249 - F-06131 GRASSE CEDEX - Tél.: 33 (0)4 93 70 01 32 - Fax: 33 (0)4 93 70 05 65 - <http://www.axyntis.com> - [contact@axyntis.com](mailto:contact@axyntis.com)  
S.A.S. au capital de 1 525 000 € - R.C.S. GRASSE 326 171 378 - APE 241 G - TVA FR 68 326 171 378

## **Appendix 6**

### **Analytical determination of achieved concentrations**

#### **SUMMARY**

The test article, Fexindazole, was formulated in DMSO by Genetic and Molecular Toxicology for treatment during the study. Formulations prepared on 6 February 2008 were received 6 and 7 February 2008 and were analysed to verify achieved concentration.

The analytical procedure was validated in study 2647/23.

#### **PROCEDURES**

##### **Achieved concentration**

Formulations received on 6 and 7 February 2008 were analysed in duplicate (apart from the controls where only a single analysis was performed).

##### **Analytical procedure**

The written analytical procedure Covance 2647/023-01F was used to determine achieved concentration.

##### **Data collection and processing**

The data was collected and processed using an Empower2 data capture system, version Build number 2154.

#### **RESULTS**

##### **6 February 2008: Experiment 2**

| Concentration mg/mL |     | Results as % nominal |      |
|---------------------|-----|----------------------|------|
| 22                  | 115 | 115                  | 114* |

---

\* third sample analysed due to high results

---

##### **7 February 2008: Experiment 2 (Reserve)**

| Concentration mg/mL |    | Results as % nominal |  |
|---------------------|----|----------------------|--|
| 22                  | 88 | 88                   |  |

---

further analysis not possible due to insufficient sample volume

---

Test article was not detected in the control sample.

## **Appendix 7**

### **Minor deviations from protocol**

| Protocol section           | Subject                     | Deviation                                                                                                                                                                                                                                       |
|----------------------------|-----------------------------|-------------------------------------------------------------------------------------------------------------------------------------------------------------------------------------------------------------------------------------------------|
| Methods                    | Main experiments            | In Experiment 1, during the medium change procedure, the cells were pelleted at approximately 1250 g for 2.5 minutes following the second saline wash in error. This deviation did not have any negative impact upon the results of this study. |
| Study specific information | Test article                | The batch number in the Protocol contained a typographical error. The Protocol stated that batch number 3168-07-01/0 was to be used. The correct batch number of Fexinidazole to be used in this study was 3168-07-01/O.                        |
| Materials, Methods         | Controls, osmolality and pH | Reference is made in the Protocol to a Range-Finder Experiment. Following consultation with the Study Monitor prior to the study start, it was not deemed necessary to perform a Range-Finder Experiment.                                       |

---
