# Supplementary material for: Fexinidazole – A New Oral Nitroimidazole Drug Candidate Entering Clinical Development for the Treatment of Sleeping Sickness
Source: PubMed Central journal article supplement (PMC3006138; doi:10.1371/journal.pntd.0000923), 2010-12-21
Supplement: pntd.0000923.s003.pdf [file pntd.0000923.s003.pdf]

## **Fexinidazole: Evaluation of the *In Vitro* Intrinsic Clearance and Metabolism with Hepatocytes from African American Donors**

|                              |              |
|------------------------------|--------------|
| Product Name:                | Fexinidazole |
| Study Number:                | 0327-2008    |
| Study Director:              |              |
| Sponsor Reference Study No.: | N.A.         |
| Status:                      | FINAL        |

## SUMMARY

Fexinidazole was incubated with cryopreserved hepatocytes from African American donors, at concentrations of 1 and 10  $\mu\text{M}$ . The 1  $\mu\text{M}$  samples were used for the intrinsic clearance determination, while the 10  $\mu\text{M}$  samples were used for metabolite profile determination. The incubation samples were analyzed by LC-MS/MS.

The intrinsic clearance was calculated using the half-life approach; the half-life and the intrinsic clearance were determined from the concentration of fexinidazole remaining at the sampling time points.

The half-life of fexinidazole was 6.5 minutes, and the corresponding intrinsic clearance value was 257 mL/min/kg.

The metabolite profile of fexinidazole was investigated at  $t=0$  and after 30 and 120 minutes incubation at the concentration of 10  $\mu\text{M}$ .

The metabolism was rapid; unchanged fexinidazole accounted for 77% of the drug related material at  $t=0$ , and for 1% after 30 minutes incubation.

The main metabolite produced by hepatocytes from African American donors was fexinidazole sulfoxide. This metabolite was present as two enantiomers; the enantiomer with the shorter retention time was detected in a ratio of about 2:1, with respect to the enantiomer with the longer retention time.

Fexinidazole sulfone and fexinidazole sulfoxide des-methylated on the imidazole ring were minor metabolites, accounting for about 1%.

Both the intrinsic clearance and the metabolite profile of fexinidazole after incubation with hepatocytes from African American donors were similar to those previously observed with hepatocytes from Caucasian donors.

**TABLE OF CONTENTS**

|                                                                                   |    |
|-----------------------------------------------------------------------------------|----|
| 1. ABBREVIATION AND DEFINITIONS OF TERMS.....                                     | 6  |
| 2. INTRODUCTION AND OBJECTIVES .....                                              | 6  |
| 3. STUDY SPONSOR .....                                                            | 7  |
| 4. TEST FACILITY.....                                                             | 7  |
| 5. REGULATORY REQUIREMENTS.....                                                   | 7  |
| 6. SCHEDULE.....                                                                  | 7  |
| 7. MATERIALS AND METHODS.....                                                     | 7  |
| 7.1. Test Item.....                                                               | 7  |
| 7.2. Metabolites .....                                                            | 8  |
| 7.3. Test System .....                                                            | 8  |
| 7.4. Chemicals .....                                                              | 8  |
| 7.5. <i>In Vitro</i> Incubations.....                                             | 8  |
| 7.5.1. Intrinsic Clearance Study .....                                            | 8  |
| 7.5.2. Metabolite Profile Study .....                                             | 9  |
| 7.6. Analysis of the Samples of Intrinsic Clearance Study .....                   | 9  |
| 7.7. Intrinsic Clearance Determination.....                                       | 10 |
| 7.8. Analysis of the Samples of Metabolite Profile Study .....                    | 10 |
| 7.8.1. Separation of Fexinidazole Sulfoxide Enantiomers with a Chiral Column..... | 12 |
| 8. ARCHIVING .....                                                                | 12 |
| 9. STUDY DEVIATIONS .....                                                         | 12 |
| 10. STUDY PERSONNEL .....                                                         | 12 |
| 11. RESULTS AND DISCUSSION .....                                                  | 13 |
| 11.1. Phase I and Phase II Activities of Hepatocytes.....                         | 13 |
| 11.2. Intrinsic Clearance Determination of Fexinidazole.....                      | 13 |
| 11.3. Metabolite Profile and Identification .....                                 | 13 |
| 11.3.1. Metabolite Profiles with the Chiral Column.....                           | 14 |
| 12. CONCLUSIONS.....                                                              | 15 |
| 13. REFERENCE.....                                                                | 15 |

## TABLES

|                                                                                                                                                                            |    |
|----------------------------------------------------------------------------------------------------------------------------------------------------------------------------|----|
| Table 1. Intrinsic clearance results for 7-ethoxycoumarin incubated at the concentration of 1 $\mu$ M with hepatocytes from African American donors <sup>(1)</sup> . ..... | 16 |
| Table 2. Phase II activity of hepatocytes from African American donors by incubation of 7-hydroxycoumarin at the concentration of 30 $\mu$ M <sup>(1)</sup> . .....        | 16 |
| Table 3. Intrinsic clearance results for fexinidazole incubated at the concentration of 1 $\mu$ M with hepatocytes from African American donors <sup>(1)</sup> . .....     | 16 |
| Table 4. Metabolites found after 0, 30 and 120 minutes incubation of fexinidazole at the concentration of 10 $\mu$ M with hepatocytes from African American donors. ....   | 16 |

## FIGURES

|                                                                                                                                                                                                                                       |    |
|---------------------------------------------------------------------------------------------------------------------------------------------------------------------------------------------------------------------------------------|----|
| Figure 1. Proposed metabolic pathway of fexinidazole after incubation at the concentration of 10 $\mu$ M with hepatocytes from African American donors. ....                                                                          | 17 |
| Figure 2. Extracted ion chromatograms of fexinidazole sulfoxide in a standard solution and after 30 and 120 minutes incubation of fexinidazole at the concentration of 10 $\mu$ M with hepatocytes from African American donors. .... | 18 |

## APPENDICES

|                                                                                                                                                                         |    |
|-------------------------------------------------------------------------------------------------------------------------------------------------------------------------|----|
| Appendix 1. Certificates of analysis of hepatocytes from African American donors used in this study. ....                                                               | 19 |
| Appendix 2. Peak area (counts) at different time points of fexinidazole incubated at the concentration of 1 $\mu$ M with hepatocytes from African American donors. .... | 24 |

## 1. ABBREVIATION AND DEFINITIONS OF TERMS

|                  |                                                           |
|------------------|-----------------------------------------------------------|
| CID              | Collision-induced decomposition                           |
| CLint            | Intrinsic clearance                                       |
| Da               | Dalton                                                    |
| DMSO             | Dimethyl sulfoxide                                        |
| 7-ETC            | 7-Ethoxycoumarin                                          |
| ESI              | Electrospray ionisation                                   |
| 7-HC             | 7-Hydroxycoumarin                                         |
| HPLC             | High performance liquid chromatography                    |
| LC-MS/MS         | Liquid chromatography-Mass spectrometry/Mass spectrometry |
| K <sub>m</sub>   | Michaelis Menten constant                                 |
| m/z              | Mass to charge                                            |
| MRM              | Multiple reaction monitoring                              |
| MS               | Mass spectrometry                                         |
| MS/MS            | Mass spectrometry/Mass spectrometry                       |
| PDA              | Photodiode array                                          |
| t <sub>1/2</sub> | Half life                                                 |
| TIS              | Turbo ion spray                                           |
| TOF              | Time of flight                                            |

## 2. INTRODUCTION AND OBJECTIVES

Fexinidazole is a 5-nitroimidazole derivative biologically active against Trypanosoma parasites (*T.b.rhodesiense* and *T.b. brucei*) under investigation in the treatment of the Human African Trypanosomiasis (HAT), known as sleeping sickness.

The intrinsic hepatic clearance and metabolite profile of fexinidazole has been previously investigated *in vitro* with hepatocytes of some animal species (mouse, rat, dog and cynomolgus monkey) and of Caucasian donors [1].

The purpose of this study (0327-2008) was to evaluate the intrinsic hepatic clearance and metabolite profile of fexinidazole with hepatocytes of African American donors.

The intrinsic hepatic clearance of fexinidazole was determined using the half-life approach, by measuring the substrate disappearance during 120 minutes incubation with hepatocytes of African American donors. LC-MS/MS was used for the detection of the compound during the incubation.

The metabolite profile and metabolite identification of fexinidazole was performed at a concentration of 10 µM of fexinidazole. The incubation samples were also analyzed on a chiral column.

### 3. STUDY SPONSOR

Drugs for Neglected Diseases *initiative* (DNDi)  
15 Chemin Louis-Dunant  
CH-1202 Geneva  
Switzerland

### 4. TEST FACILITY

Accelerera

### 5. REGULATORY REQUIREMENTS

This study was conducted for exploratory purposes outside GLP regulations and was not audited by QA. Relevant Standard Operating Procedures of Accelerera, Nerviano Medical Sciences, followed during the study were: MET-P/018/00; PCD-S-027; PCD-S-032; PCD-S-134; PCD-S-166.

### 6. SCHEDULE

|                              |                   |
|------------------------------|-------------------|
| Experimental Start Date      | 21 July 2008      |
| Experimental Completion Date | 09 September 2008 |

### 7. MATERIALS AND METHODS

#### 7.1. Test Item

|                    |                                                                                      |
|--------------------|--------------------------------------------------------------------------------------|
| Generic Name       | Fexinidazole                                                                         |
| Chemical name      | 1H-Imidazole-1-methyl-2-[[4-(methylthio)phenoxy]methyl]-5-nitro                      |
| Chemical Structure | 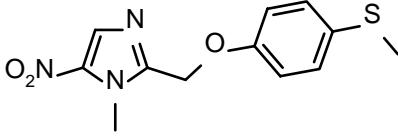 |
| Molecular Formula  | C <sub>12</sub> H <sub>13</sub> N <sub>3</sub> O <sub>3</sub> S                      |
| Molecular weight   | 279.31                                                                               |
| Lot/Batch Number   | 3168-82-99/C                                                                         |
| Purity             | 98.5% by HClO <sub>4</sub> assay                                                     |
| Expiry             | September 2008                                                                       |
| Storage Conditions | -20°C, light protection                                                              |
| Source Supplier    | The compound, manufactured by Centipharm (France), was provided by the Sponsor       |

## 7.2. Metabolites

Fexinidazole sulfoxide, lot 1106-I-0170, 99.3% purity, and fexinidazole sulfone, lot 1106-I-0171, 99.9% purity, were provided by the Sponsor.

## 7.3. Test System

Cryopreserved hepatocytes of five African American single donors, lots EHI, REL, KSE, ZIJ and MRS, were purchased from In Vitro Technologies Inc (Baltimore, Maryland, USA). The certificates of analysis are reported in Appendix 1.

## 7.4. Chemicals

Reagents and solvents were of analytical grade and obtained from Sigma-Aldrich (St. Louis, Missouri, USA).

## 7.5. *In Vitro* Incubations

On the day of the experiment a 10 mM stock solution of fexinidazole in DMSO was prepared and, within 3 hours, aliquots of this freshly prepared solution, after suitable dilution, were added to the incubation matrix, to reach fexinidazole final concentrations of 1 and 10  $\mu$ M. The final percentage of DMSO was 0.01% in the incubation samples for the intrinsic clearance determination and 0.1% in the incubation samples for metabolite profiling.

The cryopreserved hepatocytes were thawed according to the supplier's procedure and the number of viable cells was determined using the Trypan Blue exclusion method. Viabilities were 92% for lot EHI, 89% for lot REL, 82% for lot KSE, 86% for lot ZIJ and 86% for lot MRS in the intrinsic clearance study. In the metabolite profile study viabilities were 91% for lot EHI, 90% for lot REL, 85% for lot KSE, 84% for lot ZIJ and 87% for lot MRS. Afterwards, the same amount of viable cells for each donor were pooled and used for the incubations of fexinidazole.

### 7.5.1. Intrinsic Clearance Study

For the intrinsic clearance determination, fexinidazole was incubated at a concentration of 1  $\mu$ M with pooled human hepatocytes (1 million cells/mL) in a final incubation volume of 1 mL Leibovitz L-15 medium, at 37°C. Incubations were performed in duplicate in a 48-well plate under shaking. Sampling was performed using an automatic liquid handling system (Multiprobe II EX, Packard). At 0, 1, 5, 10, 15, 20, 30, 60 and 120 minutes, 50  $\mu$ L aliquots of the incubates were taken, then 80  $\mu$ L of ice-cold acetonitrile and 20  $\mu$ L of 1  $\mu$ M warfarin in acetonitrile (internal standard) were added, and samples centrifuged at 2000 rpm for 20 min. The supernatant was analyzed by LC-MS/MS.

The chemical stability of fexinidazole was checked by incubating the compound at 37°C in the medium alone at t = 0 and 120 minutes.

For the determination of phase I and phase II activities of hepatocytes, 7-ethoxycoumarin (7-ETC) 1 µM, and 7-hydroxycoumarin (7-HC) 30 µM were used as positive controls and incubated under the same conditions as fexinidazole. Aliquots of incubates were taken at 0, 1, 5, 10, 15, 20, 30, 60 and 120 minutes and processed as fexinidazole samples.

### 7.5.2. Metabolite Profile Study

For metabolite profiling, fexinidazole was incubated at a concentration of 10 µM with pooled human hepatocytes (1 million cells/mL) in a final incubation volume of 2 mL Leibovitz L-15 medium, at 37°C. Aliquots of the incubation samples were taken at t = 0, 30 and 120 minutes; the metabolism was stopped by the addition of an equal volume of cold acetonitrile and the samples centrifuged at 1100 rpm for 20 min. The supernatant was stored at -20°C until analysis. Control incubations were performed with the compound in the medium alone for 120 minutes.

### 7.6. Analysis of the Samples of Intrinsic Clearance Study

The analysis of the samples for intrinsic clearance determination was performed by an LC-MS/MS method, using the following conditions:

| <b>HPLC Equipment and Conditions</b> |                                                         |                  |               |     |     |
|--------------------------------------|---------------------------------------------------------|------------------|---------------|-----|-----|
| HPLC system                          | 1100 binary pump (Agilent, Palo Alto, USA)              |                  |               |     |     |
| Autosampler                          | 2777 (Waters)                                           |                  |               |     |     |
| Analytical column                    | Guard Column SB-C8 4.6 x 12.5 mm, 5 µm (Zorbax)         |                  |               |     |     |
| Column temperature                   | ambient                                                 |                  |               |     |     |
| Mobile phase A                       | 10 mM ammonium formate pH 4.0: acetonitrile (95:5, v:v) |                  |               |     |     |
| Mobile phase B                       | 10 mM ammonium formate pH 4.0: acetonitrile (5:95, v:v) |                  |               |     |     |
| Injection volume                     | 20 µL                                                   |                  |               |     |     |
| Gradient conditions                  | Step                                                    | Total time (min) | flow (µL/min) | % A | % B |
|                                      | 0                                                       | 0.00             | 1500          | 100 | 0   |
|                                      | 1                                                       | 0.00             | 1500          | 0   | 100 |
|                                      | 2                                                       | 0.15             | 1500          | 0   | 100 |
|                                      | 3                                                       | 0.20             | 600           | 0   | 100 |
|                                      | 4                                                       | 1.00             | 600           | 0   | 100 |
|                                      | 5                                                       | 1.35             | 600           | 100 | 0   |
|                                      | 6                                                       | 1.60             | 1500          | 100 | 0   |
| Valco Divert Valve                   | Step                                                    | Total time (min) | Position      |     |     |
|                                      | 1                                                       | 0.30             | Waste         |     |     |
|                                      | 2                                                       | 1.50             | Source        |     |     |
|                                      | 3                                                       | 1.51             | Waste         |     |     |
| <b>MS Equipment and Conditions</b>   |                                                         |                  |               |     |     |



|                   |                                                                                                                                                                                                                                               |
|-------------------|-----------------------------------------------------------------------------------------------------------------------------------------------------------------------------------------------------------------------------------------------|
| Mass spectrometer | API 4000 Triple Quadrupole (Applied Biosystems/MDS Sciex)                                                                                                                                                                                     |
| Source            | Turbo Ion Spray (TIS)                                                                                                                                                                                                                         |
| Ion mode          | Positive for fexinidazole and 7-ETC.<br>Negative for 7-HC, 7-HC sulphate and 7-HC glucuronide.<br>Warfarin was analysed both in positive and negative ion mode.                                                                               |
| Scan mode         | Multiple Reaction Monitoring (MRM)                                                                                                                                                                                                            |
| MRM transitions   | 280.0 → 140.2 (fexinidazole)<br>191.0 → 163.1 (7-ETC)<br>161.0 → 133.1 (7-HC)<br>241.1 → 161.1 (7-HC sulphate)<br>336.9 → 161.1 (7-HC glucuronide)<br>309.3 → 163.0 (warfarin positive ion mode)<br>307.3 → 57.0 (warfarin negative ion mode) |
| Software          | Analyst 1.4.1 (Applied Biosystems)                                                                                                                                                                                                            |

### 7.7. Intrinsic Clearance Determination

The intrinsic clearance ( $CL_{int}$ ) of fexinidazole and of 7-ethoxycoumarin was calculated using the half-life approach. The half-life and the  $CL_{int}$  were determined from the concentration remaining at the different sampling points using the LC-MS/MS method. By plotting the natural logarithmic area of the compound remaining against the time, the slope was calculated by exponential regression analysis, and converted into the half-life ( $t_{1/2}$ ) and  $CL_{int}$  expressed as  $\mu\text{L}/\text{min}/\text{million cells}$  and  $\text{mL}/\text{min}/\text{kg}$ .

### 7.8. Analysis of the Samples of Metabolite Profile Study

The Q-TOF 2 mass spectrometer was calibrated with a multi-point calibration in the range 70-1000 Da against the known accurate masses of the fragment ions that resulted from the collision-induced decomposition (CID) of [Glu<sup>1</sup>]-fibrinopeptide B by continuous infusion at 10  $\mu\text{L}/\text{min}$  of a 10  $\mu\text{g}/\text{mL}$  solution in a mixture of 1% aqueous formic acid: acetonitrile (1:1, v:v). The tune parameters were those optimized in a previous study with fexinidazole [1]. In order to improve the accuracy of the mass measurements, during all analyses a 10  $\mu\text{g}/\text{mL}$  solution of Met-Arg-Phe-Ala ( $m/z$  524.2655) in 10 mM ammonium formate, pH 4.5: acetonitrile (1:1, v:v) was infused into the reference source of the LockSpray at a rate of 1-2  $\mu\text{L}/\text{min}$  and a reference scan obtained every 10 seconds for automatic correction of the accurate masses. All data were acquired in centroid mode.

Before analysis, the incubation samples were evaporated to dryness under a stream of nitrogen (Turbovap), then the residues were reconstituted to the original incubation volumes with 10 mM ammonium formate, pH 4.5: acetonitrile 8:2, v:v.

The analyses were performed using an HPLC system on line with a photodiode array (PDA) detector and a mass spectrometer (MS). Equipment and conditions are given below.

| <b>HPLC Equipment and Conditions</b> |                                                                                                |               |               |
|--------------------------------------|------------------------------------------------------------------------------------------------|---------------|---------------|
| Autosampler                          | HTC Pal (CTC Analytics, San Jose, USA) equipped with a 100 µL sample loop and a 100 µL syringe |               |               |
| Binary pump                          | 1100 Series (Agilent, Palo Alto, CA, USA)                                                      |               |               |
| Degasser                             | 1100 Series (Agilent)                                                                          |               |               |
| Column oven                          | 1100 Series (Agilent)                                                                          |               |               |
| Column                               | XBridge C8, 2.1 x 150 mm, 3.5 µm (Waters)                                                      |               |               |
| Guard column                         | C8, 2 x 4 mm (Phenomenex)                                                                      |               |               |
| Column temperature                   | 40°C                                                                                           |               |               |
| Mobile phase A                       | 10 mM ammonium formate, pH 4.5                                                                 |               |               |
| Mobile phase B                       | Acetonitrile                                                                                   |               |               |
| Flow rate                            | 0.3 mL/min                                                                                     |               |               |
| Run time                             | 35 minutes                                                                                     |               |               |
| Injection volume                     | 75 µL                                                                                          |               |               |
| Gradient conditions                  | Time (min)                                                                                     | Solvent A (%) | Solvent B (%) |
|                                      | 0.0                                                                                            | 95            | 5             |
|                                      | 1.0                                                                                            | 95            | 5             |
|                                      | 4.0                                                                                            | 75            | 25            |
|                                      | 21.0                                                                                           | 40            | 60            |
|                                      | 21.5                                                                                           | 5             | 95            |
|                                      | 27.0                                                                                           | 5             | 95            |
|                                      | 27.5                                                                                           | 95            | 5             |
|                                      | 35.0                                                                                           | 95            | 5             |
| <b>PDA Detector and Conditions</b>   |                                                                                                |               |               |
| Diode Array detector                 | 1100 Series (Agilent)                                                                          |               |               |
| Range                                | 190 to 600 nm                                                                                  |               |               |
| Resolution                           | 2 nm                                                                                           |               |               |
| Width                                | 0.1 min                                                                                        |               |               |
| <b>MS Acquisition Conditions</b>     |                                                                                                |               |               |
| Acquisition software                 | Masslynx 4.1 (Waters)                                                                          |               |               |
| Processing software                  | Metabolynx 4.1 (Waters)                                                                        |               |               |
| Scan mode                            | MS Full Scan and MS/MS Full Scan                                                               |               |               |
| Acquisition polarity                 | Positive                                                                                       |               |               |
| Acquisition mode                     | Centroid                                                                                       |               |               |
| Acquisition time                     | 27 minutes                                                                                     |               |               |
| Scan range                           | 75 to 750 Da (MS Full Scan); 50 to 750 Da (MS/MS)                                              |               |               |
| Scan time                            | 0.9 sec                                                                                        |               |               |
| Interscan delay                      | 0.1 sec                                                                                        |               |               |
| Capillary voltage                    | 3 kV                                                                                           |               |               |

|                             |                                     |
|-----------------------------|-------------------------------------|
| Cone voltage                | 25 eV                               |
| Collision energy            | 10 eV (MS Full Scan); 25 eV (MS/MS) |
| Extractor voltage           | 2 eV                                |
| Rf Lens                     | 1.5 eV                              |
| Ion energy                  | 1.5 eV                              |
| Source temperature          | 120°C                               |
| Desolvation gas temperature | 250°C                               |

The incubation samples were analyzed in MS positive ion mode and the data searched on the accurate masses of possible metabolites using the Metabolynx software, version 4.1 (Waters), using a mass window of 40 mDa. Samples were then re-run in MS/MS mode by selecting the masses of possible metabolites. The collision energy used to obtain MS/MS data was 25 eV.

### 7.8.1. Separation of Fexinidazole Sulfoxide Enantiomers with a Chiral Column

The separation was performed using the equipment described in 7.8, a chiral HPLC column Chirobiotic TAG 4.6 x 250 mm, 5 µm (Astec) and methanol as mobile phase, with isocratic elution at a flow rate of 1 mL/min.

## 8. ARCHIVING

The original protocol, all raw data and supporting documents produced at the Test Facility, and the final report with original signatures were filed in the Archives of Accelera, Nerviano Medical Sciences S.r.l., Nerviano (Italy) for the period of time agreed with the Sponsor (at least 3 years) after which the Sponsor will be contacted for instructions regarding dispatch or disposal of the material.

A copy of the protocol, the report with original signatures and all relevant original documentation of the test item were filed by the Sponsor.

## 9. STUDY DEVIATIONS

No protocol deviations were observed during the study.

## 10. STUDY PERSONNEL

|  |  |
|--|--|
|  |  |
|  |  |
|  |  |
|  |  |
|  |  |

## 11. RESULTS AND DISCUSSION

### 11.1. Phase I and Phase II Activities of Hepatocytes

The hepatocytes used in this study were checked for their activities towards phase I and phase II reactions, using 7-ETC and 7-HC. Table 1 shows the disappearance half-life and intrinsic clearance of 7-ETC incubated at the concentration of 1  $\mu\text{M}$  with hepatocytes. Table 2 shows the formation of 7-HC sulphate and 7-HC glucuronide from 7-HC incubated at the concentration of 30  $\mu\text{M}$  with hepatocytes. The results confirmed that the hepatocytes used in this study exhibited active metabolism.

### 11.2. Intrinsic Clearance Determination of Fexinidazole

The intrinsic clearance of fexinidazole was determined at the concentration of 1  $\mu\text{M}$  in pooled hepatocytes of five African American donors, using the half-life approach. The starting concentration of 1  $\mu\text{M}$  was assumed to be  $\ll$  of  $K_m$ .

The half-life of fexinidazole was 6.5 minutes, and the corresponding intrinsic clearance value was 257 mL/min/kg (Table 3).

The peak area (counts) of fexinidazole at the different time points are shown in Appendix 2.

Negative controls with fexinidazole incubated for 120 minutes at 37°C in the incubation medium alone show about 40% loss of fexinidazole.

### 11.3. Metabolite Profile and Identification

The metabolite profile of fexinidazole was determined at the concentration of 10  $\mu\text{M}$  at  $t=0$  and after 30 and 120 minutes incubation.

The chromatographic separation of fexinidazole and metabolites was obtained using a reverse phase HPLC column XBridge C8, 2.1 x 150 mm, 3.5  $\mu\text{m}$  (Waters), under the same chromatographic conditions as in the previous study, when fexinidazole was incubated with hepatocytes of animal species (mouse, rat, dog and cynomolgus monkey) and of Caucasian donors [1].

The identity of metabolites was proposed based on their accurate mass (using LockSpray correction), with an accuracy of  $\pm 5$  mDa. MS/MS analyses were performed to verify that peaks were drug-related and to obtain structural information from the fragment ions formed. The identity of fexinidazole sulfoxide and fexinidazole sulfone in the incubation samples was also confirmed by comparing the retention times of the two metabolites with those of the authentic standard compounds.

The approximate relative amounts were determined from the absolute areas taken from a selected ion chromatogram at the metabolite masses with a mass window of 0.04 Da. The

absolute areas of fexinidazole, fexinidazole sulfoxide and fexinidazole sulfone were normalized based on their relative MS response (factors 1.3, 1 and 8 for fexinidazole, fexinidazole sulfoxide and fexinidazole sulfone, respectively). Nevertheless, these results should be regarded as semi-quantitative (approximate relative amounts of fexinidazole and each metabolite in the samples).

The proposed metabolic pathway of fexinidazole is shown in Figure 1.

The relative amounts of fexinidazole and metabolites detected at  $t=0$ , after 30 and 120 minutes incubation with hepatocytes of African American donors are reported in Table 4.

Fexinidazole was rapidly metabolized, as shown by the half-life of the compound.

At  $t=0$ , unchanged fexinidazole accounted for 77% of total drug related material; the remaining drug related material was due to the sulfoxide **M1**. Virtually  $t=0$  is approximately 30 seconds, just the time to add fexinidazole to hepatocytes, shake, take an aliquot and stop the metabolism by addition of acetonitrile. This explains the amount of **M1** present at this incubation time.

After **30 minutes** incubation, fexinidazole was detected in amounts of 1%. The main component (98%) was **M1**. Metabolite **M3** ( $m/z = 282.06$ ), corresponding to **M1** des-methylated on the imidazole ring, was detected in traces (less 1%).

After **120 minutes** incubation, **M1** accounted for 98%. Traces of the sulfone metabolite **M2** (1%) and of metabolite **M3** were also detected.

After 120 minutes incubation in the Leibovitz medium alone (**control sample**), fexinidazole accounted for about 82% of the total drug related material.

The lower loss of fexinidazole in the metabolite profile control sample (18%) compared to the clearance control sample (about 40%) could be explained by the different concentration of fexinidazole used: higher (10  $\mu\text{M}$ ) in the metabolite profile study and lower (1  $\mu\text{M}$ ) in the clearance study.

### 11.3.1. Metabolite Profiles with the Chiral Column

A standard solution of fexinidazole sulfoxide and the samples after 30 and 120 minutes incubation with hepatocytes were analyzed on a chiral HPLC column for the chromatographic separation of the two enantiomers of fexinidazole sulfoxide. After both 30 and 120 minutes incubation, the enantiomer with the shorter retention time was detected in a ratio of about 2:1, with respect to the enantiomer with the longer retention time, while in the standard solution the ratio was 1:1. The extracted ion chromatograms of fexinidazole sulfoxide are shown in Figure 2.

## 12. CONCLUSIONS

As previously observed with hepatocytes from Caucasian donors, fexinidazole showed a rapid and high intrinsic clearance with hepatocytes from African American donors. In agreement with the above, unchanged fexinidazole was detected in small amounts (1%) only after 30 minutes incubation. Fexinidazole sulfoxide was the main metabolite produced by human hepatocytes; this metabolite was present as two enantiomers in a ratio of about 2:1. Small amounts of fexinidazole sulfone and of the sulfoxide des-methylated on the imidazole ring were also detected.

## 13. REFERENCE

1. Fexinidazole: Evaluation of the *in vitro* cross species intrinsic clearance and metabolism with mouse, rat, dog, monkey and human hepatocytes. Accelerera Study Report 0141-2007, November 2007.

## TABLES AND FIGURES

**Table 1. Intrinsic clearance results for 7-ethoxycoumarin incubated at the concentration of 1  $\mu$ M with hepatocytes from African American donors <sup>(1)</sup>.**

| Species | t1/2 (min)      |                   | CL <sub>int</sub> <i>in vitro</i><br>( $\mu$ L/min/million cells) |                   | CL <sub>int</sub> <i>in vitro</i><br>(mL/min/kg) |                   |
|---------|-----------------|-------------------|-------------------------------------------------------------------|-------------------|--------------------------------------------------|-------------------|
|         | clearance study | met profile study | clearance study                                                   | met profile study | clearance study                                  | met profile study |
| Human   | 6.4             | 6.2               | 108                                                               | 111               | 258                                              | 267               |

(1): Mean values of two determinations

**Table 2. Phase II activity of hepatocytes from African American donors by incubation of 7-hydroxycoumarin at the concentration of 30  $\mu$ M <sup>(1)</sup>.**

| Species | 7-HC sulphate<br>(pmol/min/ million cells) |                   | 7-HC glucuronide<br>(pmol/min/ million cells) |                   |
|---------|--------------------------------------------|-------------------|-----------------------------------------------|-------------------|
|         | clearance study                            | met profile study | clearance study                               | met profile study |
| Human   | 57                                         | 38                | 372                                           | 86                |

(1): Mean values of two determinations

**Table 3. Intrinsic clearance results for fexinidazole incubated at the concentration of 1  $\mu$ M with hepatocytes from African American donors <sup>(1)</sup>.**

| Species | t1/2 (min) | CL <sub>int</sub> <i>in vitro</i><br>( $\mu$ L/min/million cells) | CL <sub>int</sub> <i>in vitro</i><br>(mL/min/kg) |
|---------|------------|-------------------------------------------------------------------|--------------------------------------------------|
| Human   | 6.5        | 107                                                               | 257                                              |

(1): Mean values of two determinations

**Table 4. Metabolites found after 0, 30 and 120 minutes incubation of fexinidazole at the concentration of 10  $\mu$ M with hepatocytes from African American donors.**

| Metabolite | Molecular formula                                               | m/z    | RT (min) | % of total drug related material <sup>(1)</sup> |     |      |     |
|------------|-----------------------------------------------------------------|--------|----------|-------------------------------------------------|-----|------|-----|
|            |                                                                 |        |          | t=0                                             | 30' | 120' | BLK |
| P          | C <sub>12</sub> H <sub>13</sub> N <sub>3</sub> O <sub>3</sub> S | 280.08 | 16.1     | 77                                              | 1   |      | 82  |
| M1         | C <sub>12</sub> H <sub>13</sub> N <sub>3</sub> O <sub>4</sub> S | 296.07 | 9.0      | 23                                              | 98  | 98   | 18  |
| M2         | C <sub>12</sub> H <sub>13</sub> N <sub>3</sub> O <sub>5</sub> S | 312.07 | 10.5     |                                                 |     | 1    |     |
| M3         | C <sub>11</sub> H <sub>11</sub> N <sub>3</sub> O <sub>4</sub> S | 282.06 | 7.5      |                                                 | <1  | <1   |     |

(1) The approximate relative amounts were determined from the absolute areas taken from a selected ion chromatogram at the metabolite masses with a mass window of 0.04 Da. The absolute areas of fexinidazole, M1 and M2 were normalized based on their relative MS response. Nevertheless, these results should be regarded as semi-quantitative.

**Figure 1. Proposed metabolic pathway of fexinidazole after incubation at the concentration of 10  $\mu$ M with hepatocytes from African American donors.**

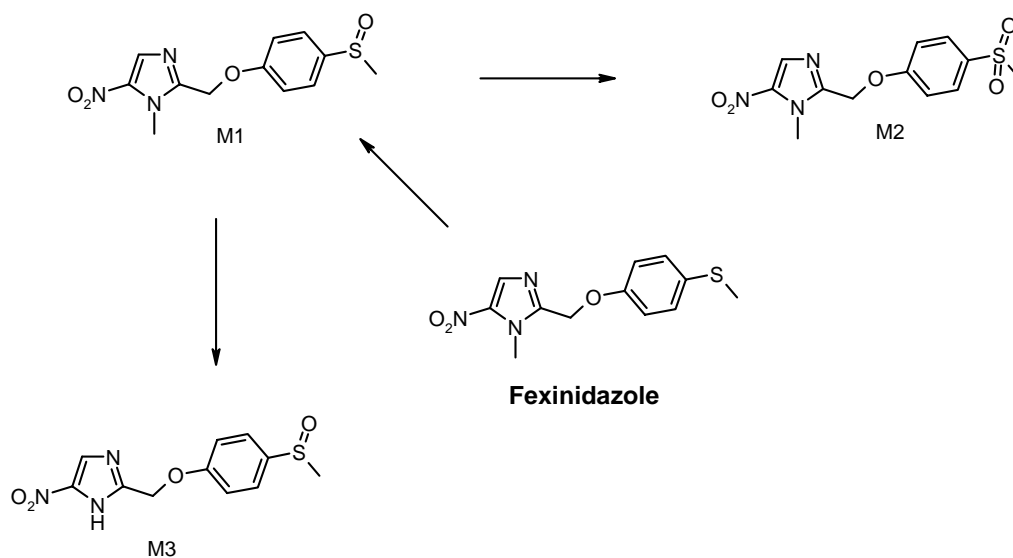



**Figure 2. Extracted ion chromatograms of fexinidazole sulfoxide in a standard solution and after 30 and 120 minutes incubation of fexinidazole at the concentration of 10  $\mu$ M with hepatocytes from African American donors.**

**Standard Mixture 10  $\mu$ M - Chiral Sep.**

Mix1\_std\_FS-6 Sm (SG, 3x3)

1: TOF MS ES+  
296.07 0.04Da  
441

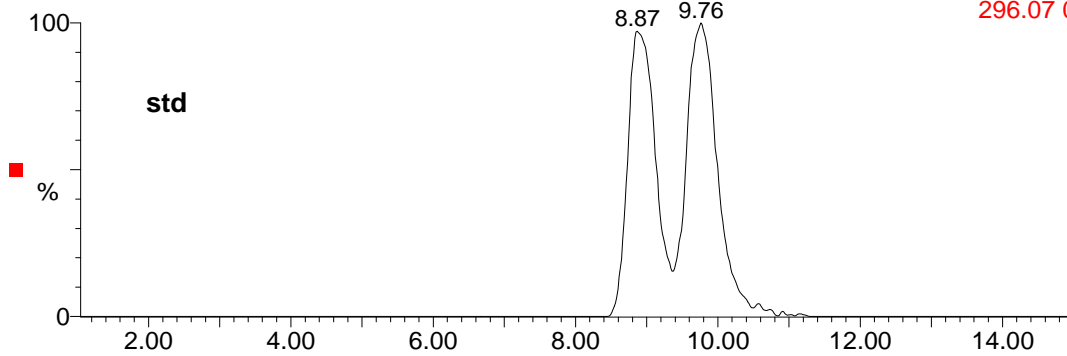

Fexinidazole\_p-hum1\_heps\_30\_FS-4 Sm (SG, 3x3)

1: TOF MS ES+  
296.07 0.04Da  
144

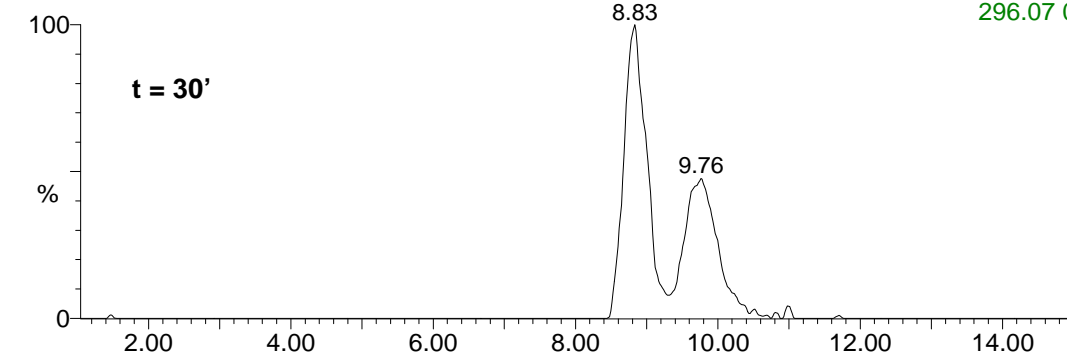

Fexinidazole\_p-hum1\_heps\_2h\_FS-2 Sm (SG, 3x3)

1: TOF MS ES+  
296.07 0.04Da  
166

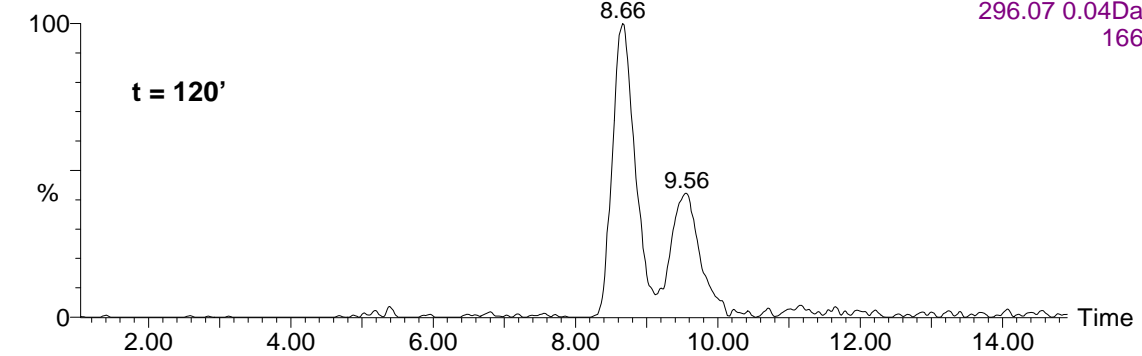

APPENDICES

Appendix 1. Certificates of analysis of hepatocytes from African American donors used in this study.

**Certificate of Analysis**

**Product Number:** F00995  
**Product:** Cryopreserved Hepatocytes  
Human, Female  
**Quantity:** 5 million  
**Lot Number:** EHI  
**storage condition:** below -150° C



---

**Relevant Donor Demographics, \*\*as reported to In Vitro Technologies**

**Age:** 58      **Race:** African American  
**Cause of Death:** ICB      **BMI:** 35.4

**Social History:**      **Alcohol Use:** Yes      **Cannabinoid use:** (none reported)  
                                         **Narcotic use:** (none reported)      **Tobacco use:** Yes

---

**Relevant Medical History:**

|                                                  |                                                   |                                                   |                                                      |
|--------------------------------------------------|---------------------------------------------------|---------------------------------------------------|------------------------------------------------------|
| <input checked="" type="checkbox"/> Diabetes     | <input type="checkbox"/> Depression/Anxiety       | <input type="checkbox"/> Hypothyroidism           | <input type="checkbox"/> Congestive heart failure    |
| <input checked="" type="checkbox"/> Hypertension | <input type="checkbox"/> Asthma                   | <input type="checkbox"/> Kidney disease           | <input checked="" type="checkbox"/> Vascular disease |
| <input type="checkbox"/> High cholesterol        | <input type="checkbox"/> Arthritis                | <input type="checkbox"/> Gastrointestinal disease | <input type="checkbox"/> Other heart disease         |
| <input type="checkbox"/> Cancer (specify below)  | <input type="checkbox"/> Other Autoimmune disease |                                                   |                                                      |

---

**Relevant Chronic Medications:**

|                                                  |                                                |                                                      |
|--------------------------------------------------|------------------------------------------------|------------------------------------------------------|
| <input type="checkbox"/> Hormone replace therapy | <input type="checkbox"/> Lipid-lowering agents | <input type="checkbox"/> Anti-infectives             |
| <input type="checkbox"/> Anti-hypertensives      | <input type="checkbox"/> Insulin               | <input type="checkbox"/> Anti-depressants/Anxiolytic |

---

|                                                                                                    |                                                            |
|----------------------------------------------------------------------------------------------------|------------------------------------------------------------|
| <b>Specification:</b>                                                                              | <b>Result:</b>                                             |
| 1) Serology testing:                                                                               | CMV <b>POSITIVE</b><br>HIV <b>NEGATIVE</b>                 |
|                                                                                                    | Hepatitis B <b>NEGATIVE</b><br>Hepatitis C <b>NEGATIVE</b> |
| 2) ≥ 5 million cells with at least 70% post-thaw viability as determined by Trypan blue exclusion: | <b>PASS</b>                                                |

---

**Lot Characterization Results**

|                                                           |        |                                 |
|-----------------------------------------------------------|--------|---------------------------------|
| COUM: total rate of formation of 7-hydroxycoumarin        | 88     | pmole/10 <sup>6</sup> cells/min |
| DEX: rate of formation of dextrophan                      | 3      | pmole/10 <sup>6</sup> cells/min |
| EQOQ: Total rate of formation of 7-hydroxycoumarin        | 58     | pmole/10 <sup>6</sup> cells/min |
| 7-HCG: rate of formation of 7-hydroxycoumarin glucuronide | 291    | pmole/10 <sup>6</sup> cells/min |
| 7-HCS: rate of formation of 7-hydroxycoumarin sulfate     | 45     | pmole/10 <sup>6</sup> cells/min |
| MEPH: rate of formation of 4'-hydroxymephenytoin          | 1      | pmole/10 <sup>6</sup> cells/min |
| TEST: rate of formation of 6B-hydroxytestosterone         | 248    | pmole/10 <sup>6</sup> cells/min |
| TOLB: rate of formation of 4'-methylhydroxytolbutamide    | 21     | pmole/10 <sup>6</sup> cells/min |
| PHEN: rate of formation of acetaminophen                  | 45     | pmole/10 <sup>6</sup> cells/min |
| CZX: rate of formation of 6-hydroxychlorzoxazone          | 43     | pmole/10 <sup>6</sup> cells/min |
| NAT1                                                      | 2.39   | nmol/mg/min                     |
| NAT2                                                      | 0.234  | nmol/mg/min                     |
| NAT1 genotype                                             | *4/*10 |                                 |
| NAT2 genotype                                             | *6/*14 |                                 |
| 2C19 genotype                                             |        |                                 |
| 2D6 genotype                                              |        |                                 |
| 2C9 genotype                                              |        |                                 |

---

Biohazard Warning: These products have been made using human donor tissue and should be considered as potential biohazards. Although the original tissue tested negative for HIV and Hepatitis B and C, caution is advised when handling these products. These products are for research use only and should not be used in animals or humans. These cells have not been approved for any diagnostic or clinical procedures.

\*\*Donor information is provided if a reference is made to the donor and is not to be used for any other purpose.

*[Signature]*

This product has been tested by controlled procedures and conforms to all specifications.

**Certificate of Analysis**

**Product Number:** F00995  
**Product:** Cryopreserved Hepatocytes  
Human, Female  
**Quantity:** 5 million  
**Lot Number:** REL  
**storage condition:** below -150° C

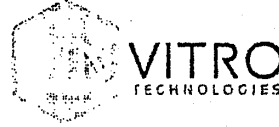

**Relevant Donor Demographics, \*\*as reported to In Vitro Technologies**

**Age:** 60 **Race:** African American  
**Cause of Death:** ICB **BMI:** 31.6  
**Social History:** Alcohol Use: Yes **Cannabinoid use:** (none reported)  
Narcotic use: (none reported) **Tobacco use:** Yes

**Relevant Medical History:**

- Diabetes
- Hypertension
- High cholesterol
- Cancer (specify below)
- Depression/Anxiety
- Asthma
- Arthritis
- Other Autoimmune disease
- Hypothyroidism
- Kidney disease
- Gastrointestinal disease
- Congestive heart failure
- Vascular disease
- Other heart disease

**Relevant Chronic Medications:**

- Hormone replace therapy
- Anti-hypertensives
- Lipid-lowering agents
- Insulin
- Anti-inflammatory
- Anti-depressants/Anxiolytic

**Specification:**

**Result:**

1) Serology testing: **CMV** **NEGATIVE** **Hepatitis B** **NEGATIVE**  
**HIV** **NEGATIVE** **Hepatitis C** **NEGATIVE**  
2) ≥ 5.0 million cells with at least 70% post-thaw viability  
as determined by Trypan blue exclusion: **PASS**

**Lot Characterization Results**

|                                                           |       |                                 |
|-----------------------------------------------------------|-------|---------------------------------|
| COUM: total rate of formation of 7-hydroxycoumarin        | 40    | pmole/10 <sup>6</sup> cells/min |
| DEX: rate of formation of dextrorphan                     | 20    | pmole/10 <sup>6</sup> cells/min |
| ECOD: Total rate of formation of 7-hydroxycoumarin        | 15    | pmole/10 <sup>6</sup> cells/min |
| 7-HCG: rate of formation of 7-hydroxycoumarin glucuronide | 109   | pmole/10 <sup>6</sup> cells/min |
| 7-HGS: rate of formation of 7-hydroxycoumarin sulfate     | 9     | pmole/10 <sup>6</sup> cells/min |
| MEPH: rate of formation of 4'-hydroxymephenytoin          | 65    | pmole/10 <sup>6</sup> cells/min |
| TEST: rate of formation of 6β-hydroxytestosterone         | 100   | pmole/10 <sup>6</sup> cells/min |
| TOLB: rate of formation of 4'-methylhydroxytolbutamide    | 33    | pmole/10 <sup>6</sup> cells/min |
| PHEN: rate of formation of acetaminophen                  | 75    | pmole/10 <sup>6</sup> cells/min |
| CZX: rate of formation of 6-hydroxychlorzoxazone          | 10    | pmole/10 <sup>6</sup> cells/min |
| NAT1                                                      | 4.51  | nmol/mg/min                     |
| NAT2                                                      | 0.268 | nmol/mg/min                     |
| NAT1 genotype                                             | wt/wt |                                 |
| NAT2 genotype                                             | wt/wt |                                 |
| 2C19 genotype                                             | wt/wt |                                 |
| 2D6 genotype                                              | wt/wt |                                 |
| 2C9 genotype                                              | wt/wt |                                 |

**Biohazard Warning:** These products have been made using human donor tissue and should be considered as potential biohazards. Although the original tissue tested negative for HIV and Hepatitis B and C, caution is advised when handling these products. These products are for research use only and should not be used in animals or humans. These cells have not been approved for any diagnostic or clinical procedures.

\*\*Donor information is provided as a reference and cannot be confirmed or further substantiated in order to maintain donor confidentiality.

This product has been tested by controlled procedures and conforms to all specifications.

**Certificate of Analysis**

**Product Number:** M00995  
**Product:** Cryopreserved Hepatocytes  
Human, Male  
**Quantity:** 5 million  
**Lot Number:** KSE  
**storage condition:** below -150° C

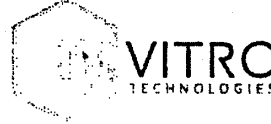

**Relevant Donor Demographics, \*\*as reported to In Vitro Technologies**

**Age:** 79 **Race:** African American  
**Cause of Death:** CVA **BMI:** 32.5  
**Social History:** Alcohol Use: (none reported) Cannabinoid use: (none reported)  
Narcotic use: (none reported) Tobacco use: Yes

**Relevant Medical History:**

- Diabetes
- Hypertension
- High cholesterol
- Cancer (specify below)  
Breast
- Depression/Anxiety
- Asthma
- Arthritis
- Other Autoimmune disease
- Hypothyroidism
- Kidney disease
- Gastrointestinal disease
- Congestive heart failure
- Vascular disease
- Other heart disease

**Relevant Chronic Medications:**

- Hormone replace therapy
- Anti-hypertensives
- Lipid-lowering agents
- Insulin
- Anti-inflammatories
- Anti-depressants/Anxiolytic

| Specification:                                                                                       | Result:                                                                                                  |
|------------------------------------------------------------------------------------------------------|----------------------------------------------------------------------------------------------------------|
| 1) Serology testing:                                                                                 | CMV <b>POSITIVE</b><br>HIV <b>NEGATIVE</b><br>Hepatitis B <b>NEGATIVE</b><br>Hepatitis C <b>NEGATIVE</b> |
| 2) ≥ 5.0 million cells with at least 70% post-thaw viability as determined by Trypan blue exclusion: | <b>PASS</b>                                                                                              |

**Lot Characterization Results**

|                                                           |        |                                 |
|-----------------------------------------------------------|--------|---------------------------------|
| COUM: total rate of formation of 7-hydroxycoumarin        | 65     | pmole/10 <sup>6</sup> cells/min |
| DEX: rate of formation of dextrorphan                     | 27     | pmole/10 <sup>6</sup> cells/min |
| ECOD: Total rate of formation of 7-hydroxycoumarin        | 52     | pmole/10 <sup>6</sup> cells/min |
| 7-HCG: rate of formation of 7-hydroxycoumarin glucuronide | 206    | pmole/10 <sup>6</sup> cells/min |
| 7-HGS: rate of formation of 7-hydroxycoumarin sulfate     | 74     | pmole/10 <sup>6</sup> cells/min |
| MEPH: rate of formation of 4'-hydroxymephenytoin          | 21     | pmole/10 <sup>6</sup> cells/min |
| TEST: rate of formation of 6β-hydroxytestosterone         | 123    | pmole/10 <sup>6</sup> cells/min |
| TOLB: rate of formation of 4'-methylhydroxytolbutamide    | 42     | pmole/10 <sup>6</sup> cells/min |
| PHEN: rate of formation of acetaminophen                  | 63     | pmole/10 <sup>6</sup> cells/min |
| CZX: rate of formation of 6-hydroxychlorzoxazone          | 16     | pmole/10 <sup>6</sup> cells/min |
| NAT1                                                      | 4.82   | nmol/mg/min                     |
| NAT2                                                      | 0.066  | nmol/mg/min                     |
| NAT1 genotype                                             | *4/*10 |                                 |
| NAT2 genotype                                             | *6/*7  |                                 |
| 2C19 genotype                                             | wt/wt  |                                 |
| 2D6 genotype                                              | wt/wt  |                                 |
| 2C9 genotype                                              | wt/wt  |                                 |

**Biohazard Warning:** These products have been made using human donor tissue and should be considered as potential biohazards. Although the original tissue tested negative for HIV and Hepatitis B and C, caution is advised when handling these products. These products are for research use only and should not be used in animals or humans. These cells have not been approved for any diagnostic or clinical procedures.

\*\*Donor information is provided as a reference and cannot be confirmed or further substantiated in order to maintain donor confidentiality.

This product has been tested by controlled procedures and conforms to all specifications.

**Certificate of Analysis**

**Product Number:** M00995  
**Product:** Cryopreserved Hepatocytes  
Human, Male  
**Quantity:** 5 million  
**Lot Number:** ZIJ  
**storage condition:** below -150° C

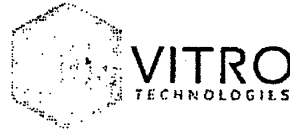

**Relevant Donor Demographics, \*\*as reported to In Vitro Technologies**

**Age:** 22 **Race:** African American  
**Cause of Death:** HT **BMI:** 25.1  
**Social History:** Alcohol Use: (none reported) Cannabinoid use: Marijuana  
Narcotic use: (none reported) Tobacco use: (none reported)

**Relevant Medical History:**

- Diabetes
- Hypertension
- High cholestrol
- Cancer (specify below)
- Depression/Anxiety
- Asthma
- Arthritis
- Other Autoimmune disease
- Hypothyroidism
- Kidney disease
- Gastrointestinal disease
- Congestive heart failure
- Vascular disease
- Other heart disease

**Relevant Chronic Medications:**

- Hormone replace therapy
- Anti-hypertensives
- Lipid-lowering agents
- Insulin
- Anti-inflammatory
- Anti-depressants/Anxiolytic

**Specification: Result:**

1) Serology testing: CMV **NEGATIVE** Hepatitis B **NEGATIVE**  
HIV **NEGATIVE** Hepatitis C **NEGATIVE**  
2) ≥ 5.0 million cells with at least 70% post-thaw viability  
as determined by Trypan blue exclusion: **PASS**

**Lot Characterization Results**

|                                                           |       |                                 |
|-----------------------------------------------------------|-------|---------------------------------|
| COUM: total rate of formation of 7-hydroxycoumarin        | 6     | pmole/10 <sup>6</sup> cells/min |
| DEX: rate of formation of dextrorphan                     | 33    | pmole/10 <sup>6</sup> cells/min |
| ECOD: Total rate of formation of 7-hydroxycoumarin        | 31    | pmole/10 <sup>6</sup> cells/min |
| 7-HCG: rate of formation of 7-hydroxycoumarin glucuronide | 320   | pmole/10 <sup>6</sup> cells/min |
| 7-HGS: rate of formation of 7-hydroxycoumarin sulfate     | 29    | pmole/10 <sup>6</sup> cells/min |
| MEPH: rate of formation of 4-hydroxymephenytoin           | 13    | pmole/10 <sup>6</sup> cells/min |
| TEST: rate of formation of 6β-hydroxytestosterone         | 25    | pmole/10 <sup>6</sup> cells/min |
| TOLB: rate of formation of 4'-methoxytolbutamide          | 34    | pmole/10 <sup>6</sup> cells/min |
| PHEN: rate of formation of acetaminophen                  | 3     | pmole/10 <sup>6</sup> cells/min |
| CZX: rate of formation of 6-hydroxychlorzoxazone          | 13    | pmole/10 <sup>6</sup> cells/min |
| NAT1                                                      | 7.28  | nmol/mg/min                     |
| NAT2                                                      | 0.166 | nmol/mg/min                     |
| NAT1 genotype                                             | *4/*4 |                                 |
| NAT2 genotype                                             | *5/*6 |                                 |
| 2C19 genotype                                             | wt/wt |                                 |
| 2D6 genotype                                              | wt/wt |                                 |
| 2C9 genotype                                              | wt/wt |                                 |

**Biohazard Warning:** These products have been made using human donor tissue and should be considered as potential biohazards. Although the original tissue tested negative for HIV and Hepatitis B and C, caution is advised when handling these products. These products are for research use only and should not be used in animals or humans. These cells have not been approved for any diagnostic or clinical procedures.

\*\*Donor information is provided as a reference and cannot be confirmed or further substantiated in order to maintain donor confidentiality.

This product has been tested by controlled procedures and conforms to all specifications.

**Certificate of Analysis**

**Product Number:** M00995  
**Product:** Cryopreserved Hepatocytes  
Human, Male  
**Quantity:** 5 million  
**Lot Number:** MRS  
**storage condition:** below -150° C

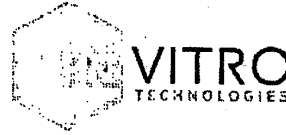

**Relevant Donor Demographics, \*\*as reported to In Vitro Technologies**

**Age:** 42      **Race:** African American  
**Cause of Death:** ICH      **BMI:** 21.3  
**Social History:** Alcohol Use: Yes      Cannabinoid use: Marijuana  
Narcotic use: Cocaine      Tobacco use: Yes

**Relevant Medical History:**

- |                                                 |                                                   |                                                   |                                                   |
|-------------------------------------------------|---------------------------------------------------|---------------------------------------------------|---------------------------------------------------|
| <input type="checkbox"/> Diabetes               | <input type="checkbox"/> Depression/Anxiety       | <input type="checkbox"/> Hypothyroidism           | <input type="checkbox"/> Congestive heart failure |
| <input type="checkbox"/> Hypertension           | <input type="checkbox"/> Asthma                   | <input type="checkbox"/> Kidney disease           | <input type="checkbox"/> Vascular disease         |
| <input type="checkbox"/> High cholesterol       | <input type="checkbox"/> Arthritis                | <input type="checkbox"/> Gastrointestinal disease | <input type="checkbox"/> Other heart disease      |
| <input type="checkbox"/> Cancer (specify below) | <input type="checkbox"/> Other Autoimmune disease |                                                   |                                                   |

**Relevant Chronic Medications:**

- |                                                  |                                                |                                                      |
|--------------------------------------------------|------------------------------------------------|------------------------------------------------------|
| <input type="checkbox"/> Hormone replace therapy | <input type="checkbox"/> Lipid-lowering agents | <input type="checkbox"/> Anti-inflammatories         |
| <input type="checkbox"/> Anti-hypertensives      | <input type="checkbox"/> Insulin               | <input type="checkbox"/> Anti-depressants/Anxiolytic |

**Specification:**

**Result:**

1) Serology testing:      CMV      **NEGATIVE**      Hepatitis B      **NEGATIVE**  
                                         HIV      **NEGATIVE**      Hepatitis C      **NEGATIVE**  
2) ≥ 5.0 million cells with at least 70% post-thaw viability  
as determined by Trypan blue exclusion:      **PASS**

**Lot Characterization Results**

|                                                           |     |                                 |
|-----------------------------------------------------------|-----|---------------------------------|
| COUM: total rate of formation of 7-hydroxycoumarin        | 119 | pmole/10 <sup>6</sup> cells/min |
| DEX: rate of formation of dextrorphan                     | 21  | pmole/10 <sup>6</sup> cells/min |
| ECOD: Total rate of formation of 7-hydroxycoumarin        | 110 | pmole/10 <sup>6</sup> cells/min |
| 7-HCG: rate of formation of 7-hydroxycoumarin glucuronide | 450 | pmole/10 <sup>6</sup> cells/min |
| 7-HGS: rate of formation of 7-hydroxycoumarin sulfate     | 50  | pmole/10 <sup>6</sup> cells/min |
| MEPH: rate of formation of 4'-hydroxymephenytol           | 2   | pmole/10 <sup>6</sup> cells/min |
| TEST: rate of formation of 6β-hydroxytestosterone         | 675 | pmole/10 <sup>6</sup> cells/min |
| TOLB: rate of formation of 4'-methylhydroxytolbutamide    | 54  | pmole/10 <sup>6</sup> cells/min |
| PHEN: rate of formation of acetaminophen                  | 68  | pmole/10 <sup>6</sup> cells/min |
| CZX: rate of formation of 6-hydroxychlorzoxazone          | 28  | pmole/10 <sup>6</sup> cells/min |
| NAT1                                                      | TBD | nmol/mg/min                     |
| NAT2                                                      | TBD | nmol/mg/min                     |
| NAT1 genotype                                             | TBD |                                 |
| NAT2 genotype                                             | TBD |                                 |
| 2C19 genotype                                             | TBD |                                 |
| 2D6 genotype                                              | TBD |                                 |
| 2C9 genotype                                              | TBD |                                 |

**Biohazard Warning:** These products have been made using human donor tissue and should be considered as potential biohazards. Although the original tissue tested negative for HIV and Hepatitis B and C, caution is advised when handling these products. These products are for research use only and should not be used in animals or humans. These cells have not been approved for any diagnostic or clinical procedures.

\*\*Donor information is provided as a reference and cannot be confirmed or further substantiated in order to maintain donor confidentiality.

This product has been tested by controlled procedures and conforms to all specifications.

Appendix 2. Peak area (counts) at different time points of fexinidazole incubated at the concentration of 1  $\mu$ M with hepatocytes from African American donors.

| <b>Exp</b> | <b>t=0</b> | <b>t=1'</b> | <b>t=5'</b> | <b>t=10'</b> | <b>t=15'</b> | <b>t=20'</b> | <b>t=30'</b> | <b>t=60'</b> | <b>t=120'</b> |
|------------|------------|-------------|-------------|--------------|--------------|--------------|--------------|--------------|---------------|
| 1          | 814000     | 685000      | 457000      | 255000       | 158000       | 98900        | 24800        | 1400         | nd            |
| 2          | 802000     | 678000      | 515000      | 308000       | 152000       | 78500        | 25100        | 1380         | nd            |

nd: not detectable
