# Supplementary material for: Fexinidazole – A New Oral Nitroimidazole Drug Candidate Entering Clinical Development for the Treatment of Sleeping Sickness
Source: PubMed Central journal article supplement (PMC3006138; doi:10.1371/journal.pntd.0000923), 2010-12-21
Supplement: pntd.0000923.s004.pdf [file pntd.0000923.s004.pdf]

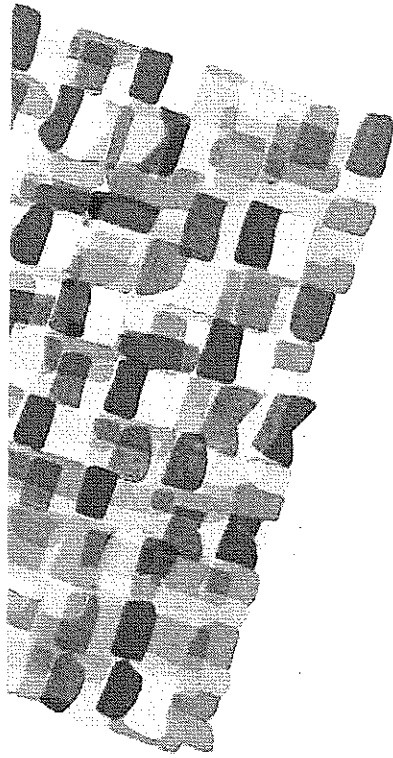

STUDY NUMBER 14925  
FINAL REPORT

**ADME-Tox**  
- Study of Compounds Fexinidazole,  
Fexinidazole sulfone and Fexindazole sulfoxyde -

 Cerep

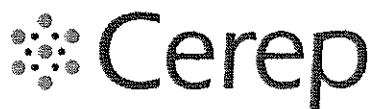

Ref.: Final Report 14925/ND

**STUDY NUMBER 14925**

**ADME-Tox**

**- Study of Compounds Fexinidazole, Fexinidazole sulfone and  
Fexindazole sulfoxyde -**

Study Sponsor: DNDI FOUNDATION

Attention: Dr. Els TORREELE  
Senior Project Manager

Address: 15 chemin Louis Dunant  
CH-1202 GENEVA  
SWITZERLAND

Study Director:

Testing Facility: Cerep

Study Period: From August 04, 2008 to August 13, 2008

Report Version: 1

Report Date: August 26, 2008

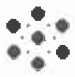

|                 |
|-----------------|
| <b>CONTENTS</b> |
|-----------------|

|                                                 |           |
|-------------------------------------------------|-----------|
| <b>1. PURPOSE OF THE STUDY.....</b>             | <b>4</b>  |
| <b>2. MATERIALS AND METHODS .....</b>           | <b>5</b>  |
| 2.1. ADME-Tox: Bioanalytical .....              | 5         |
| 2.1.1. General Procedures .....                 | 5         |
| 2.1.2. Experimental Conditions .....            | 5         |
| 2.1.3. Analysis and Expression of Results ..... | 5         |
| 2.2. ADME-Tox: <i>In Vitro</i> Metabolism ..... | 6         |
| 2.2.1. General Procedures .....                 | 6         |
| 2.2.2. Experimental Conditions .....            | 6         |
| 2.2.3. Analysis and Expression of Results ..... | 7         |
| <b>3. COMPOUNDS .....</b>                       | <b>8</b>  |
| 3.1. Test Compounds .....                       | 8         |
| 3.2. Reference Compounds .....                  | 8         |
| <b>4. RESULTS .....</b>                         | <b>9</b>  |
| 4.1. ADME-Tox: Bioanalytical .....              | 9         |
| 4.2. ADME-Tox: <i>In Vitro</i> Metabolism ..... | 11        |
| <b>5. BIBLIOGRAPHY .....</b>                    | <b>15</b> |
| <b>6. DATA AND RECORDS STORAGE.....</b>         | <b>16</b> |
| <b>7. QUALITY ASSURANCE STATEMENT.....</b>      | <b>17</b> |

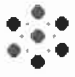

## **1. PURPOSE OF THE STUDY**

The purpose of this study was to test compounds Fexinidazole, Fexinidazole sulfone and Fexinidazole sulfoxide in various metabolic stability assays.

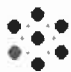

## 2. MATERIALS AND METHODS

### 2.1. ADME-Tox: Bioanalytical

#### 2.1.1. General Procedures

| Assay          | Technique              | Additional Information                                                                       |
|----------------|------------------------|----------------------------------------------------------------------------------------------|
| HPLC-MS Screen | HPLC-MS and HPLC-MS/MS | Full scan and product ion spectra; SRM conditions for quantitation, and ionization potential |

#### 2.1.2. Experimental Conditions

| Assay          | Test Compound                                                         | Condition                                   | Analytical method         |
|----------------|-----------------------------------------------------------------------|---------------------------------------------|---------------------------|
| HPLC-MS Screen | 200 $\mu$ M (n=2)<br>acetonitrile/methanol/water<br>(25/25/50, v/v/v) | Full-scan analysis followed by<br>tandem MS | HPLC-MS and<br>HPLC-MS/MS |

#### Abbreviations:

HPLC-MS/MS: HPLC coupled with tandem mass spectrometry (Instrumentation: Thermo Finnigan)

HPLC-MS: HPLC with mass spectrometry detection (Instrumentation: Thermo Finnigan)

HPLC: High performance liquid chromatography

SRM: Selected reaction monitoring

#### 2.1.3. Analysis and Expression of Results

##### HPLC-MS Screen

Full scan HPLC-MS analysis was conducted on the test compound at 200  $\mu$ M. Total ion current chromatograms and corresponding mass spectra were generated for each test compound in both positive and negative ionization modes. The precursor ions for MS/MS were selected from either the positive or the negative mass spectrum, as a function of the respective ion abundance. In addition, product ion HPLC-MS/MS analysis was performed in order to determine the appropriate selected fragmentation reaction for use in quantitative analysis. The final reaction monitoring parameters were chosen to maximize the possibility for quantitation of the test compound when present within a complex mixture of components. Finally, each test compound was assigned a rank number of ionization, which directly indicates its ease of quantitation.

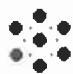

## 2.2. ADME-Tox: *In Vitro* Metabolism

### 2.2.1. General Procedures

| Assay                         | Source                         | Reference Compound           | Bibliography         |
|-------------------------------|--------------------------------|------------------------------|----------------------|
| Metabolic Stability (CYP1A2)  | Human recombinant (40 pmol/mL) | propranolol, ethoxyresorufin | Suzuki et al. (1999) |
| Metabolic Stability (CYP2B6)  | Human recombinant (10 pmol/mL) | propranolol, benzphetamine   | Suzuki et al. (1999) |
| Metabolic Stability (CYP2C8)  | Human recombinant (50 pmol/mL) | propranolol, paclitaxel      | Suzuki et al. (1999) |
| Metabolic Stability (CYP2C9)  | Human recombinant (10 pmol/mL) | propranolol, diclofenac      | Suzuki et al. (1999) |
| Metabolic Stability (CYP2C19) | Human recombinant (10 pmol/mL) | propranolol, promazine       | Suzuki et al. (1999) |
| Metabolic Stability (CYP2D6)  | Human recombinant (10 pmol/mL) | propranolol, terfenadine     | Suzuki et al. (1999) |
| Metabolic Stability (CYP3A4)  | Human recombinant (10 pmol/mL) | propranolol, terfenadine     | Suzuki et al. (1999) |
| Metabolic Stability (CYP3A5)  | Human recombinant (10 pmol/mL) | propranolol, terfenadine     | Suzuki et al. (1999) |

#### Notes:

CYP1A2: from PanVera, catalog number P2792.  
CYP2B6: from BD Gentest, catalog number 456255.  
CYP2C8: from BD Gentest, catalog number 456252.  
CYP2C9: from Panvera, catalog number P2378.  
CYP2C19: from PanVera, catalog number P2570.  
CYP2D6: from BD Gentest, catalog number 456217.  
CYP3A4: from PanVera, catalog number P2377.  
CYP3A5: from PanVera, catalog number P2512.

### 2.2.2. Experimental Conditions

| Assay                        | Substrate / Cofactor                                                              | Incubation                                                | Detected Component                                     | Analytical Method |
|------------------------------|-----------------------------------------------------------------------------------|-----------------------------------------------------------|--------------------------------------------------------|-------------------|
| Metabolic Stability (CYP1A2) | Test compound (1 $\mu$ M), NADP (1.3 mM), G6P (3.3 mM), G6PDHase (0.4 U/ml) (n=2) | 0 and 60 min, 37 $^{\circ}$ C<br>Phosphate buffer, pH 7.4 | Product ion corresponding to the test compound via SRM | HPLC-MS/MS        |
| Metabolic Stability (CYP2B6) | Test compound (1 $\mu$ M), NADP (1.3 mM), G6P (3.3 mM), G6PDHase (0.4 U/mL) (n=2) | 0 and 60 min, 37 $^{\circ}$ C<br>Phosphate buffer, pH 7.4 | Product ion corresponding to the test compound via SRM | HPLC-MS/MS        |

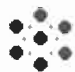

| Assay                         | Substrate / Cofactor                                                                | Incubation                                                | Detected Component                                     | Analytical Method |
|-------------------------------|-------------------------------------------------------------------------------------|-----------------------------------------------------------|--------------------------------------------------------|-------------------|
| Metabolic Stability (CYP2C8)  | Test compound (1 $\mu$ M), NADP (1.3 mM), G6P (3.3 mM), G6PDHase (0.4 U/ml) (n=2)   | 0 and 60 min, 37 $^{\circ}$ C<br>Phosphate buffer, pH 7.4 | Product ion corresponding to the test compound via SRM | HPLC-MS/MS        |
| Metabolic Stability (CYP2C9)  | Test compound (1 $\mu$ M), NADP (1.3 mM), G6P (3.3 mM), G6PDHase (0.4 U/ml) (n=2)   | 0 and 60 min, 37 $^{\circ}$ C<br>Phosphate buffer, pH 7.4 | Product ion corresponding to the test compound via SRM | HPLC-MS/MS        |
| Metabolic Stability (CYP2C19) | Test compound (1 $\mu$ M), NADP (1.3 mM), G6P (3.3 mM), G6PDHase (0.4 U/ml) (n=2)   | 0 and 60 min, 37 $^{\circ}$ C<br>Phosphate buffer, pH 7.4 | Product ion corresponding to the test compound via SRM | HPLC-MS/MS        |
| Metabolic Stability (CYP2D6)  | Test compound (1 $\mu$ M), NADP (1.3 mM), G6P (3.3 mM), G6PDHase (0.4 U/mL) (n=2)   | 0 and 60 min, 37 $^{\circ}$ C<br>Phosphate buffer, pH 7.4 | Product ion corresponding to the test compound via SRM | HPLC-MS/MS        |
| Metabolic Stability (CYP3A4)  | Test compound (1 $\mu$ M), NADP (1.3 mM), G6P (3.3 mM), G6PDHase (0.4 U/mL) (n = 2) | 0 and 60 min, 37 $^{\circ}$ C<br>Phosphate buffer, pH 7.4 | Product ion corresponding to the test compound via SRM | HPLC-MS/MS        |
| Metabolic Stability (CYP3A5)  | Test compound (1 $\mu$ M) NADP (1.3 mM), G6P (3.3 mM), G6PDHase (0.4 U/mL) (n=2)    | 0 and 60 min. 37 $^{\circ}$ C<br>Phosphate buffer, pH 7.4 | Product ion corresponding to the test compound via SRM | HPLC-MS/MS        |

**Abbreviations:**

CYP: Cytochrome P450

G6P: D-Glucose-6-phosphate, from Sigma, catalog number G-7772

G6PDHase: Glucose-6-phosphate dehydrogenase, from Sigma, catalog number G-4134

HPLC-MS/MS: HPLC coupled with tandem mass spectrometry (Instrumentation: Thermo Finnigan)

HPLC: High performance liquid chromatography

NADP:  $\beta$ -Nicotinamide adenine dinucleotide phosphate, from Sigma, catalog number N-0505

SRM: Selected reaction monitoring

**2.2.3. Analysis and Expression of Results**Metabolic Stability (recombinant CYP, microsomes, S9 or hepatocytes)

At the end of incubation at each of the time points, an equal volume of an organic mixture (acetonitrile/methanol, 50/50, v/v) was added to the incubation mixture followed by centrifugation. Samples were analyzed by HPLC-MS/MS. Peak areas corresponding to the analytes were determined by HPLC-MS/MS. The ratio of precursor compound remaining at the end of the incubation relative to the amount remaining at time zero, expressed as percent, is reported as metabolic stability.

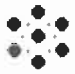

### **3. COMPOUNDS**

#### **3.1. Test Compounds**

From: DNDI FOUNDATION

| CEREP I.D. | Compound I.D.          | Reference Number | Batch Number | Molecular Weight | Submitted F.W. | Stock Solution |
|------------|------------------------|------------------|--------------|------------------|----------------|----------------|
| 14925-1    | Fexinidazole           | ECH:08179/58     | 3168-07-01/O | 279              | 279            | 1.E-02 M DMSO  |
| 14925-2    | Fexinidazole sulfone   | ECH:08179/60     | 3218-87-56   | 311              | 311            | 1.E-02 M DMSO  |
| 14925-3    | Fexinidazole sulfoxyde | ECH:08179/59     | 3217-87-47/B | 295              | 295            | 1.E-02 M DMSO  |

F.W.: Formula Weight

#### **3.2. Reference Compounds**

In each experiment, the respective reference compounds were tested concurrently with compounds Fexinidazole, Fexinidazole sulfone and Fexinidazole sulfoxyde, and the data were compared with historical values determined at Cerep. The experiment was accepted in accordance with Cerep's validation Standard Operating Procedure.



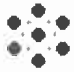

## **4. RESULTS**

### **4.1. ADME-Tox: Bioanalytical**

The individual data obtained with compounds Fexinidazole, Fexinidazole sulfone and Fexinidazole sulfoxide are reported in table 1 - 1.

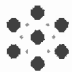**Table 1 - 1****Individual Data**

| Assay Cerep<br>Compound I.D. | Client<br>Compound I.D. | Molecular<br>Weight | FW  | Selected ESI<br>(+)<br>Precursor Ion<br>(m/z) | Product<br>Ion<br>(m/z) | Collision<br>Offset<br>(V) | Ionization<br>Classification |
|------------------------------|-------------------------|---------------------|-----|-----------------------------------------------|-------------------------|----------------------------|------------------------------|
| <b>HPLC-MS Screen</b>        |                         |                     |     |                                               |                         |                            |                              |
| 14925-1                      | Fexinidazole            | 279                 | 279 | 280.0                                         | 140.0                   | -20                        | 2.0                          |
| 14925-2                      | Fexinidazole sulfone    | 311                 | 311 | 312.0                                         | 140.0                   | -20                        | 3.0                          |
| 14925-3                      | Fexinidazole sulfoxyde  | 295                 | 295 | 296.0                                         | 233.0                   | -20                        | 2.0                          |

**Notes:****Ionization Classification:**

- 1 = Highly ionizable compound
- 2 = Intermediately ionizable compound
- 3 = Poorly ionizable compound

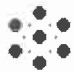

#### **4.2. ADME-Tox: *In Vitro* Metabolism**

##### Metabolic Stability:

The summary results obtained with compounds Fexinidazole, Fexinidazole sulfone and Fexinidazole sulfoxyde are reported in table 2 - 1.

The individual data obtained with compounds Fexinidazole, Fexinidazole sulfone and Fexinidazole sulfoxyde are reported in table 2 - 2.

The individual data obtained with the reference compounds are reported in table 2 - 3.

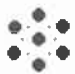

Table 2 - 1

## Summary Results

| Assay Cerep<br>Compound I.D.         | Client Compound I.D.   | Test<br>Concentration<br>(M) | Mean<br>Parent Remaining<br>(%) |
|--------------------------------------|------------------------|------------------------------|---------------------------------|
| <b>Metabolic Stability (CYP1A2)</b>  |                        |                              |                                 |
| 14925-1                              | Fexinidazole           | 1.0E-06                      | 28                              |
| 14925-2                              | Fexinidazole sulfone   | 1.0E-06                      | 79                              |
| 14925-3                              | Fexinidazole sulfoxyde | 1.0E-06                      | 101                             |
| <b>Metabolic Stability (CYP2B6)</b>  |                        |                              |                                 |
| 14925-1                              | Fexinidazole           | 1.0E-06                      | 12                              |
| 14925-2                              | Fexinidazole sulfone   | 1.0E-06                      | 99                              |
| 14925-3                              | Fexinidazole sulfoxyde | 1.0E-06                      | 98                              |
| <b>Metabolic Stability (CYP2C8)</b>  |                        |                              |                                 |
| 14925-1                              | Fexinidazole           | 1.0E-06                      | 91                              |
| 14925-2                              | Fexinidazole sulfone   | 1.0E-06                      | 96                              |
| 14925-3                              | Fexinidazole sulfoxyde | 1.0E-06                      | 97                              |
| <b>Metabolic Stability (CYP2C9)</b>  |                        |                              |                                 |
| 14925-1                              | Fexinidazole           | 1.0E-06                      | 97                              |
| 14925-2                              | Fexinidazole sulfone   | 1.0E-06                      | 93                              |
| 14925-3                              | Fexinidazole sulfoxyde | 1.0E-06                      | 97                              |
| <b>Metabolic Stability (CYP2C19)</b> |                        |                              |                                 |
| 14925-1                              | Fexinidazole           | 1.0E-06                      | 0                               |
| 14925-2                              | Fexinidazole sulfone   | 1.0E-06                      | 102                             |
| 14925-3                              | Fexinidazole sulfoxyde | 1.0E-06                      | 101                             |
| <b>Metabolic Stability (CYP2D6)</b>  |                        |                              |                                 |
| 14925-1                              | Fexinidazole           | 1.0E-06                      | 73                              |
| 14925-2                              | Fexinidazole sulfone   | 1.0E-06                      | 103                             |
| 14925-3                              | Fexinidazole sulfoxyde | 1.0E-06                      | 100                             |
| <b>Metabolic Stability (CYP3A4)</b>  |                        |                              |                                 |
| 14925-1                              | Fexinidazole           | 1.0E-06                      | 13                              |
| 14925-2                              | Fexinidazole sulfone   | 1.0E-06                      | 102                             |
| 14925-3                              | Fexinidazole sulfoxyde | 1.0E-06                      | 97                              |
| <b>Metabolic Stability (CYP3A5)</b>  |                        |                              |                                 |
| 14925-1                              | Fexinidazole           | 1.0E-06                      | 21                              |
| 14925-2                              | Fexinidazole sulfone   | 1.0E-06                      | 103                             |
| 14925-3                              | Fexinidazole sulfoxyde | 1.0E-06                      | 105                             |

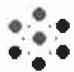

Table 2 - 2

## Individual Data

| Assay Cerep<br>Compound I.D.         | Client Compound I.D.   | Test<br>Concentration<br>(M) | Parent Remaining       |                        |             |
|--------------------------------------|------------------------|------------------------------|------------------------|------------------------|-------------|
|                                      |                        |                              | 1 <sup>st</sup><br>(%) | 2 <sup>nd</sup><br>(%) | Mean<br>(%) |
| <b>Metabolic Stability (CYP1A2)</b>  |                        |                              |                        |                        |             |
| 14925-1                              | Fexinidazole           | 1.0E-06                      | 27.8                   | 27.8                   | <b>28</b>   |
| 14925-2                              | Fexinidazole sulfone   | 1.0E-06                      | 80.1                   | 77.4                   | <b>79</b>   |
| 14925-3                              | Fexinidazole sulfoxyde | 1.0E-06                      | 99.7                   | 102.0                  | <b>101</b>  |
| <b>Metabolic Stability (CYP2B6)</b>  |                        |                              |                        |                        |             |
| 14925-1                              | Fexinidazole           | 1.0E-06                      | 12.3                   | 11.9                   | <b>12</b>   |
| 14925-2                              | Fexinidazole sulfone   | 1.0E-06                      | 99.5                   | 98.7                   | <b>99</b>   |
| 14925-3                              | Fexinidazole sulfoxyde | 1.0E-06                      | 99.1                   | 97.9                   | <b>98</b>   |
| <b>Metabolic Stability (CYP2C8)</b>  |                        |                              |                        |                        |             |
| 14925-1                              | Fexinidazole           | 1.0E-06                      | 91.9                   | 89.4                   | <b>91</b>   |
| 14925-2                              | Fexinidazole sulfone   | 1.0E-06                      | 95.3                   | 96.5                   | <b>96</b>   |
| 14925-3                              | Fexinidazole sulfoxyde | 1.0E-06                      | 98.0                   | 95.5                   | <b>97</b>   |
| <b>Metabolic Stability (CYP2C9)</b>  |                        |                              |                        |                        |             |
| 14925-1                              | Fexinidazole           | 1.0E-06                      | 91.5                   | 101.9                  | <b>97</b>   |
| 14925-2                              | Fexinidazole sulfone   | 1.0E-06                      | 88.5                   | 97.7                   | <b>93</b>   |
| 14925-3                              | Fexinidazole sulfoxyde | 1.0E-06                      | 93.3                   | 100.2                  | <b>97</b>   |
| <b>Metabolic Stability (CYP2C19)</b> |                        |                              |                        |                        |             |
| 14925-1                              | Fexinidazole           | 1.0E-06                      | 0.5                    | 0.4                    | <b>0</b>    |
| 14925-2                              | Fexinidazole sulfone   | 1.0E-06                      | 103.1                  | 101.0                  | <b>102</b>  |
| 14925-3                              | Fexinidazole sulfoxyde | 1.0E-06                      | 101.0                  | 101.3                  | <b>101</b>  |
| <b>Metabolic Stability (CYP2D6)</b>  |                        |                              |                        |                        |             |
| 14925-1                              | Fexinidazole           | 1.0E-06                      | 71.9                   | 73.5                   | <b>73</b>   |
| 14925-2                              | Fexinidazole sulfone   | 1.0E-06                      | 111.0                  | 94.6                   | <b>103</b>  |
| 14925-3                              | Fexinidazole sulfoxyde | 1.0E-06                      | 98.8                   | 100.3                  | <b>100</b>  |
| <b>Metabolic Stability (CYP3A4)</b>  |                        |                              |                        |                        |             |
| 14925-1                              | Fexinidazole           | 1.0E-06                      | 14.4                   | 10.8                   | <b>13</b>   |
| 14925-2                              | Fexinidazole sulfone   | 1.0E-06                      | 105.8                  | 99.1                   | <b>102</b>  |
| 14925-3                              | Fexinidazole sulfoxyde | 1.0E-06                      | 99.6                   | 93.8                   | <b>97</b>   |
| <b>Metabolic Stability (CYP3A5)</b>  |                        |                              |                        |                        |             |
| 14925-1                              | Fexinidazole           | 1.0E-06                      | 20.9                   | 21.5                   | <b>21</b>   |
| 14925-2                              | Fexinidazole sulfone   | 1.0E-06                      | 104.0                  | 101.1                  | <b>103</b>  |
| 14925-3                              | Fexinidazole sulfoxyde | 1.0E-06                      | 106.4                  | 103.9                  | <b>105</b>  |

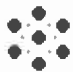

Table 2 - 3

## Reference Compound Data

| Assay<br>Reference Compound          | Test<br>Concentration<br>(M) | Parent Remaining       |                        |             |
|--------------------------------------|------------------------------|------------------------|------------------------|-------------|
|                                      |                              | 1 <sup>st</sup><br>(%) | 2 <sup>nd</sup><br>(%) | Mean<br>(%) |
| <b>Metabolic Stability (CYP1A2)</b>  |                              |                        |                        |             |
| Ethoxyresorufin                      | 1.0E-06                      | 0.7                    | 0.7                    | <b>1</b>    |
| Propranolol                          | 1.0E-06                      | 43.4                   | 45.3                   | <b>44</b>   |
| <b>Metabolic Stability (CYP2B6)</b>  |                              |                        |                        |             |
| Benphetamine                         | 1.0E-06                      | 4.3                    | 4.1                    | <b>4</b>    |
| Propranolol                          | 1.0E-06                      | 99.0                   | 101.6                  | <b>100</b>  |
| <b>Metabolic Stability (CYP2C8)</b>  |                              |                        |                        |             |
| Paclitaxel                           | 1.0E-06                      | 1.0                    | 3.9                    | <b>2</b>    |
| Propranolol                          | 1.0E-06                      | 96.8                   | 98.6                   | <b>98</b>   |
| <b>Metabolic Stability (CYP2C9)</b>  |                              |                        |                        |             |
| Diclofenac                           | 1.0E-06                      | 0.2                    | 0.1                    | <b>0</b>    |
| Propranolol                          | 1.0E-06                      | 102.8                  | 99.4                   | <b>101</b>  |
| <b>Metabolic Stability (CYP2C19)</b> |                              |                        |                        |             |
| Promazine                            | 1.0E-06                      | 56.6                   | 57.4                   | <b>57</b>   |
| Propranolol                          | 1.0E-06                      | 90.5                   | 91.6                   | <b>91</b>   |
| <b>Metabolic Stability (CYP2D6)</b>  |                              |                        |                        |             |
| Propranolol                          | 1.0E-06                      | 11.5                   | 11.2                   | <b>11</b>   |
| Terfenadine                          | 1.0E-06                      | 119.3                  | 123.8                  | <b>122</b>  |
| <b>Metabolic Stability (CYP3A4)</b>  |                              |                        |                        |             |
| Propranolol                          | 1.0E-06                      | 102.3                  | 101.4                  | <b>102</b>  |
| Terfenadine                          | 1.0E-06                      | 11.2                   | 11.8                   | <b>12</b>   |
| <b>Metabolic Stability (CYP3A5)</b>  |                              |                        |                        |             |
| Propranolol                          | 1.0E-06                      | 99.5                   | 104.9                  | <b>102</b>  |
| Terfenadine                          | 1.0E-06                      | 7.6                    | 7.0                    | <b>7</b>    |

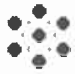

## **5. BIBLIOGRAPHY**

**SUZUKI, A., IIDA, I., TANAKA, F., AKIMOTO, M., FUKUSHIMA, K., TANI, M., ISHIZAKI, T., and CHIBA, K. (1999)**

Identification of human cytochrome P-450 isoforms involved in metabolism of R(+)- and S(-)- gallopamil: utility of in vitro disappearance rate.

*Drug Metab. Dispos.*, 27: 1254-1259.

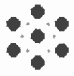

## **6. DATA AND RECORDS STORAGE**

All documents generated during the performance of the study (raw data, various records such as QA audit reports, an original copy of the study report, study plan...) will be archived by Cerep for a 10-year period after study completion. The access to the archives is restricted to authorized employees only.

The original final report provided to the sponsor will be kept by the sponsor under its sole responsibility.
