# Supplementary material for: Fexinidazole – A New Oral Nitroimidazole Drug Candidate Entering Clinical Development for the Treatment of Sleeping Sickness
Source: PubMed Central journal article supplement (PMC3006138; doi:10.1371/journal.pntd.0000923), 2010-12-21
Supplement: pntd.0000923.s009.pdf [file pntd.0000923.s009.pdf]

# FINAL REPORT

STUDY NUMBER  
**6DNDIP3**

## MDR1-MDCK Permeability

### SUMMARY

The bi-directional permeability of three test compounds was examined in an MDR1-MDCK system. Test compounds RO-15-0216-001-004 and RO-15-6547-000-001 were classified as having a low brain penetration potential, while test compound Fexinidazole was classified as having a high brain penetration potential.

### DATE OF ISSUE

September 21, 2006

### PREPARED FOR

DNDi  
1 Place St Gervais  
Geneva, CH-1201, Switzerland

### PREPARED BY

Absorption Systems, LP

### COMPLIANCE

This study followed established practices and standard operating procedures of Absorption Systems, LP. The report is archived in a validated Scientific Data Management System. Electronic signatures comply with the regulation 21 CFR Part 11.

---

## 1. OBJECTIVE

The objective of this study was to determine the bi-directional MDR1-MDCK permeability and efflux limited absorption potential of three test compounds.

## 2. PERMEABILITY, MDR1-MDCK

MDR1-MDCK monolayers were grown to confluence on collagen-coated, microporous, polycarbonate membranes in 12-well Costar Transwell® plates. Details of the plates and their certification are shown below. The permeability assay buffer for the donor chamber was Hanks Balanced Salt Solution containing 10 mM HEPES and 15 mM glucose at a pH of 7.4. The buffer in the receiver chamber also contained 1% Bovine Serum Albumin (BSA). The test compound dosing concentrations were 5 µM in the assay buffer. The cells were dosed on the apical side (A-to-B) or basolateral side (B-to-A) and incubated at 37°C with 5% CO<sub>2</sub> in a humidified incubator. After two hours, aliquots were taken from the receiver and donor chambers. Each determination was performed in duplicate. The Lucifer Yellow flux was also measured for each monolayer after being subjected to the test compounds to ensure no damage was inflicted to the cell monolayers during the flux period. All samples were assayed by LC/MS/MS using electrospray ionization. Analytical conditions are outlined in Attachment I. The apparent permeability, P<sub>app</sub>, and percent recovery were calculated as follows:

$$P_{app} = (dC_r/dt) \times V_r / (A \times C) \quad (1)$$

$$\text{Percent Recovery} = 100 \times ((V_r \times C_r^{final}) + (V_d \times C_d^{final})) / (V_d \times C_N) \quad (2)$$

where,

$dC_r/dt$  is the slope of the cumulative concentration in the receiver compartment versus time in µM s<sup>-1</sup>.

$V_r$  is the volume of the receiver compartment in cm<sup>3</sup>.

$V_d$  is the volume of the donor compartment in cm<sup>3</sup>.

A is the area of the cell monolayer (1.13 cm<sup>2</sup> for 12-well Transwell®).

$C_N$  is the nominal concentration of the dosing solution in µM.

C is the average of the nominal dosing concentration and the measured concentration in the donor chamber at 2 hours.

$C_r^{final}$  is the cumulative receiver concentration in µM at the end of the incubation period.

$C_d^{final}$  is the concentration of the donor in µM at the end of the incubation period.

|                                                            |             |                            |
|------------------------------------------------------------|-------------|----------------------------|
| Plate:                                                     | TW12        |                            |
| Seed Date:                                                 | 9/11/06 PSK |                            |
| Passage #:                                                 | 26          |                            |
| Age (days):                                                | 9           |                            |
|                                                            |             | <b>Acceptance Criteria</b> |
| TEER Value (Ω·cm <sup>2</sup> ):                           | 1819        | >1200                      |
| Lucifer Yellow P <sub>app</sub> , x 10 <sup>-6</sup> cm/s: | 0.12        | <0.40                      |
| Atenolol P <sub>app</sub> , x 10 <sup>-6</sup> cm/s:       | 0.09        | <0.50                      |
| Propranolol P <sub>app</sub> , x 10 <sup>-6</sup> cm/s:    | 17          | 10-30                      |
| Digoxin (A-B) P <sub>app</sub> , x 10 <sup>-6</sup> cm/s:  | 0.13        | None                       |
| Digoxin (B-A) P <sub>app</sub> , x 10 <sup>-6</sup> cm/s:  | 8.83        | None                       |
| Digoxin (B-A P <sub>app</sub> ) / (A-B P <sub>app</sub> ): | 68.8        | >10                        |

Table 2.1 Recovery and Apparent Permeability ( $10^{-6}$  cm/s) of Test Compounds

| Test Compound Identification | Percent Recovery <sup>(B)</sup> |     | $P_{app}$ A→B |        |      | $P_{app}$ B→A |        |      | $\frac{P_{app}^{B \rightarrow A}}{P_{app}^{A \rightarrow B}}$<br>Ratio | Brain Penetration Potential <sup>(A)</sup> |
|------------------------------|---------------------------------|-----|---------------|--------|------|---------------|--------|------|------------------------------------------------------------------------|--------------------------------------------|
|                              | A→B                             | B→A | Rep. 1        | Rep. 2 | Avg  | Rep. 1        | Rep. 2 | Avg  |                                                                        |                                            |
| RO-15-0216-001-004           | 90                              | 97  | 3.93          | 4.08   | 4.00 | 66.1          | 68.0   | 67.0 | 17                                                                     | Low                                        |
| RO-15-6547-000-001           | 95                              | 96  | 2.01          | 2.27   | 2.14 | 57.5          | 70.8   | 64.1 | 30                                                                     | Low                                        |
| Fexinidazole                 | 71                              | 77  | 58.9          | 62.4   | 60.6 | 53.6          | 56.6   | 55.1 | 0.9                                                                    | High                                       |

<sup>(A)</sup> Brain Penetration Classification:

|                                                                                      |          |
|--------------------------------------------------------------------------------------|----------|
| $P_{app}$ (A-to-B) $\geq 3.0 \times 10^{-6}$ cm/s and Efflux $< 3.0$ :               | High     |
| $P_{app}$ (A-to-B) $\geq 3.0 \times 10^{-6}$ cm/s and $10.0 > \text{Efflux} > 3.0$ : | Moderate |
| $P_{app}$ (A-to-B) $\geq 3.0 \times 10^{-6}$ cm/s and Efflux $> 10.0$ :              | Low      |
| $P_{app}$ (A-to-B) $< 3.0 \times 10^{-6}$ cm/s:                                      | Low      |

<sup>(B)</sup> Low recoveries caused by non-specific binding, etc. can affect the measured permeability.

## COMMENTS

Test compounds RO-15-0216-001-004 and RO-15-6547-000-001 were classified as having a low brain penetration potential, primarily due to excessive efflux. Fexinidazole was classified as having a high brain penetration potential.

All cell monolayers passed the post-experiment Lucifer Yellow integrity test (NB# AS521, pages 90-91).

**ATTACHMENT I****Liquid Chromatography**

Column: Keystone Hypersil BDS C18 30x2.0 mm i.d., 3 µm, with guard column

M.P. Buffer: 25 mM Ammonium Formate Buffer, pH 3.5

Aqueous Reservoir (A): 90% water, 10% buffer

Organic Reservoir (B): 90% acetonitrile, 10% buffer

Flow Rate: 300 µL/minute

Gradient Program:

| Time (Min) | % A | % B |
|------------|-----|-----|
| 0.0        | 100 | 0   |
| 1.5        | 0   | 100 |
| 2.0        | 0   | 100 |
| 2.1        | 100 | 0   |
| 3.5        | 100 | 0   |

Total Run Time: 3.5 min

Autosampler: 10 µL Injection Volume

Autosampler Wash: water/acetonitrile/2-propanol: 1/1/1; with 0.2% formic acid

**Mass Spectrometer**

Instrument: PE SCIEX API 2000

Interface: Electrospray ("Turbo Ionspray")

Mode: Multiple Reaction Monitoring

Method: 3.5 minute duration

Settings:

| Compound           | Q1/Q3        | DP | FP  | EP | CE | CXP | IS   | TEM | GS1 | GS2 | CUR | CAD |
|--------------------|--------------|----|-----|----|----|-----|------|-----|-----|-----|-----|-----|
| RO-15-0216-001-004 | +334.1/58.0  | 66 | 200 | 10 | 43 | 10  | 5500 | 500 | 40  | 80  | 20  | 4   |
| RO-15-6547-000-001 | +360.1/84.1  | 66 | 200 | 10 | 44 | 4   | 5500 | 500 | 40  | 80  | 20  | 4   |
| Fexinidazole       | +280.3/140.3 | 87 | 200 | 10 | 24 | 7   | 5500 | 500 | 40  | 80  | 20  | 4   |
