# Supplementary material for: Fexinidazole – A New Oral Nitroimidazole Drug Candidate Entering Clinical Development for the Treatment of Sleeping Sickness
Source: PubMed Central journal article supplement (PMC3006138; doi:10.1371/journal.pntd.0000923), 2010-12-21
Supplement: pntd.0000923.s014.pdf [file pntd.0000923.s014.pdf]

## **Fexinidazole: Effects on Cardiovascular Parameters after Oral Administration to the Beagle Dog**

|                           |                |
|---------------------------|----------------|
| Product Name:             | Fexinidazole   |
| Study Number:             | 0506-2007      |
| Study Director/Author:    |                |
| Sponsor Reference Number: | Not Applicable |
| Status                    | Final          |

## SUMMARY

Fexinidazole is a 5-nitroimidazole derivate, biologically active against Trypanosoma parasites (T.b.rhodesiense and T.b. brucei), under investigation for the treatment of the Human African trypanosomiasis (HAT), known as sleeping sickness. The purpose of this study (0506-2007) was to investigate the potential effects of the test item on cardiovascular parameters in the conscious beagle dog following a single oral administration.

Four male animals were used in this study. Each animal received a single oral administration of the vehicle and of fexinidazole at escalating doses of 100, 300 and 1000 mg/kg. The interval between each test item dose was 4 days.

Oral administration of fexinidazole at doses of 100, 300 and 1000 mg/kg to beagle dogs did not have any meaningful effect on blood pressure, heart rate and ECG intervals, including the QT interval. Body temperature was moderately increased in a dose-dependent manner from the dose of 300 mg/kg between 2 and 5 hours after administration.

In the conditions of this study, the no-observed-effect-level (NOEL) for fexinidazole on cardiovascular parameters and ECG intervals was 1000 mg/kg. The NOEL on body temperature was 100 mg/kg.

**TABLE OF CONTENTS**

|                                                     |    |
|-----------------------------------------------------|----|
| QUALITY ASSURANCE STATEMENT .....                   | 4  |
| SUMMARY .....                                       | 5  |
| 1. INTRODUCTION AND OBJECTIVES .....                | 8  |
| 2. STUDY SPONSOR .....                              | 8  |
| 3. TEST FACILITY .....                              | 8  |
| 4. REGULATORY REQUIREMENTS.....                     | 8  |
| 5. SCHEDULE.....                                    | 8  |
| 6. MATERIALS AND METHODS.....                       | 9  |
| 6.1. Test and Control Items .....                   | 9  |
| 6.1.1. Test Item.....                               | 9  |
| 6.1.2. Vehicle/Control Item.....                    | 9  |
| 6.1.3. Test Formulation .....                       | 9  |
| 6.1.4. Test Formulation Analyses .....              | 9  |
| 6.1.5. Stability .....                              | 9  |
| 6.2. Test System .....                              | 10 |
| 6.2.1. Animals .....                                | 10 |
| 6.2.2. Environmental Conditions .....               | 10 |
| 6.2.3. Instrumentation .....                        | 10 |
| 6.3. Treatment and Experimental Design .....        | 11 |
| 6.3.1. Clinical Observation.....                    | 11 |
| 6.3.2. Telemetry recordings .....                   | 11 |
| 7. ARCHIVING .....                                  | 12 |
| 8. STUDY PERSONNEL .....                            | 12 |
| 9. RESULTS AND DISCUSSION .....                     | 12 |
| 9.1. Cardiovascular Parameters .....                | 12 |
| 9.1.1. Arterial Blood Pressure and Heart Rate ..... | 12 |
| 9.1.2. ECG.....                                     | 13 |
| 9.2. Body Temperature .....                         | 13 |
| 10. CONCLUSIONS.....                                | 13 |
| 11. REFERENCES .....                                | 13 |
| 12. FIGURES.....                                    | 14 |

*APPENDICES*

**Appendix 1. Study data listing**

Appendix 1.1. Vehicle

Appendix 1.2. Fexinidazole, 100 mg/kg/day

Appendix 1.3. Fexinidazole, 300 mg/kg/day

Appendix 1.4. Fexinidazole, 1000 mg/kg/day

**Appendix 2. Protocol and Amendments**

**Appendix 3. Pharmacy Certification**

## 1. INTRODUCTION AND OBJECTIVES

Fexinidazole is a 5-nitroimidazole derivate, biologically active against *Trypanosoma* parasites (*T.b.rhodesiense* and *T.b. brucei*), under investigation for the treatment of the Human African trypanosomiasis (HAT), known as sleeping sickness. The purpose of this study (0506-2007) was to determine the potential toxicity of the test item on cardiovascular parameters in the conscious beagle dog following a single oral administration. Cardiovascular parameters were collected from chronically implanted animals (telemetric technique).

## 2. STUDY SPONSOR

Drugs for Neglected Diseases *initiative* (DNDi)  
1, Place St Gervais  
CH-1201 Geneva  
Switzerland

## 3. TEST FACILITY

Accelera

## 4. REGULATORY REQUIREMENTS

This study was conducted in compliance with:

- Decreto Legislativo 2 Marzo 2007, No. 50;
- Organisation for Economic Co-operation and Development (OECD) Principles of Good Laboratory Practice (GLP) (as revised in 1997).

The methods employed in this study were those described in the "Standard Operating Procedures" of the laboratories involved.

## 5. SCHEDULE

|                                                                |                             |
|----------------------------------------------------------------|-----------------------------|
| Experimental Start Date (weighing of animals)                  | 21 <sup>st</sup> March 2008 |
| First treatment (vehicle)                                      | 25 <sup>th</sup> March 2008 |
| Last treatment                                                 | 4 <sup>th</sup> April 2008  |
| Experimental Completion Date (end of last telemetry recording) | 5 <sup>th</sup> April 2008  |

## 6. MATERIALS AND METHODS

### 6.1. Test and Control Items

#### 6.1.1. Test Item

|                              |                                                                                                                                        |
|------------------------------|----------------------------------------------------------------------------------------------------------------------------------------|
| Identification               | Fexinidazole                                                                                                                           |
| Lot/Batch Number             | 3168-07-01/O                                                                                                                           |
| Purity                       | 100.2%                                                                                                                                 |
| Expiry                       | October 2008                                                                                                                           |
| Storage Conditions           | Room temperature, protected from light                                                                                                 |
| Source and Manufacturer      | Centipharm (formerly Orgasynth, as communicated by the Sponsor)                                                                        |
| Special Handling Precautions | Usual protection of all personnel conducting the study (mask, gloves and eyeglasses) or according to MSDS (Material Safety Data Sheet) |

#### 6.1.2. Vehicle/Control Item

|                         |                                                        |               |
|-------------------------|--------------------------------------------------------|---------------|
| Identification          | 5% Tween 80 in 0.5% Methyl cellulose 400 cP (Methocel) |               |
| Lot/Batch Number        | Tween 80                                               | 1324202       |
|                         | Methyl cellulose 400 cP                                | 125K0196      |
| Expiry                  | Tween 80                                               | February 2011 |
|                         | Methyl cellulose 400 cP                                | January 2009  |
| Storage Conditions      | Room temperature                                       |               |
| Source and Manufacturer | Tween 80                                               | Sigma-Aldrich |
|                         | Methyl cellulose 400 cP                                | Sigma-Aldrich |
| Method of Preparation   | On file at ADMET/Preclinical formulation               |               |

#### 6.1.3. Test Formulation

|                          |                                                              |
|--------------------------|--------------------------------------------------------------|
| Type of Formulation      | Suspension in vehicle                                        |
| Method of Preparation    | On file at ADMET/Preclinical formulation                     |
| Frequency of Preparation | Suspensions will be prepared according to the stability data |
| Dose Concentrations      | 10, 30, 100 mg/mL                                            |
| Storage Conditions       | Room temperature in the dark                                 |
| Source and Manufacturer  | Accelera/Preclinical Formulation                             |

#### 6.1.4. Test Formulation Analyses

Samples (top-middle-bottom, 5 mL each) of each dose suspension were collected under stirring for concentration and homogeneity check test of fexinidazole; 10 mL were taken also from the vehicle. After collection, samples were directly transferred at +4°C to Bioanalysis & Analytical Control for analysis. The analyses were performed using a validated HPLC/UV method.

All values were found to be within acceptable limits.

#### 6.1.5. Stability

Stability data indicate that fexinidazole suspensions in 5% Tween 80 in 0.5% methyl cellulose 400 cP (Methocel) in the range 0.5 - 100 mg/mL are stable up to 7 days at room temperature and 14 days at +4°C (NervianoMS 0293-2007-R).

## 6.2. Test System

### 6.2.1. Animals

|                           |                                                                                                                                                                                                                                                                                                                                                                                                                                                                                                                                |
|---------------------------|--------------------------------------------------------------------------------------------------------------------------------------------------------------------------------------------------------------------------------------------------------------------------------------------------------------------------------------------------------------------------------------------------------------------------------------------------------------------------------------------------------------------------------|
| Species/Strain and Source | Beagle dog, Marshall Europe                                                                                                                                                                                                                                                                                                                                                                                                                                                                                                    |
| Justification of Species  | The choice of species and strain (beagle dog) was based on the availability of extensive background data relating to the cardiovascular effects of drugs. Beagle dogs are commonly used as non-rodent species in safety studies. Moreover, the dog was used in the 4-week toxicity study and has a similar metabolism to man, being therefore exposed to the drug and its metabolites (Accelera study No. 0141-2007). Only males were used since no significant gender-related differences in systemic exposure were expected. |
| Age                       | Adult (> 1 year)                                                                                                                                                                                                                                                                                                                                                                                                                                                                                                               |
| Weight                    | 7.0 – 13.2 kg at the start of the study                                                                                                                                                                                                                                                                                                                                                                                                                                                                                        |
| Acclimation               | At least 40 days                                                                                                                                                                                                                                                                                                                                                                                                                                                                                                               |
| Selection Criteria        | Acceptable ECG and BP telemetry signals (visual inspection).                                                                                                                                                                                                                                                                                                                                                                                                                                                                   |

### 6.2.2. Environmental Conditions

|             |                                                                                              |
|-------------|----------------------------------------------------------------------------------------------|
| Caging      | Solid floor pen (room No. 010, building 64)                                                  |
| Bedding     | Sawdust (L.G. Packing Wood S.r.l., Condove, Turin)                                           |
| Temperature | 18°C to 21°C                                                                                 |
| Air changes | Approximately 20/hour                                                                        |
| Humidity    | 40-70% UR                                                                                    |
| Lighting    | Approximate 12-hour light, 12-hour dark cycle                                                |
| Water       | Free access to water from municipal main                                                     |
| Diet        | 300 g/day of a standard GLP pelleted diet (Altromin Rieper S.r.l., Vandoies, Bolzano, Italy) |

All the above environmental conditions, as well as all the procedures adopted throughout the study for housing and handling the animals, were in strict compliance with EU and Italian Guidelines for Laboratory Animal Welfare.

### 6.2.3. Instrumentation

Physiological parameters were measured by means of a telemetry system (Data Science International, St. Paul, MN USA). In this study, telemetry transmitters (model TL11M2-D70-PCT) were implanted in the abdominal cavity and allowed recording of ECG (intracardiac lead), blood pressure (via abdominal aorta) and body temperature. Animals were surgically instrumented at least 3 weeks before the start of the study.

Prior to the start of the study, animals were checked for general health status and for the functionality of the radio-transmitters (readable and normal ECG and blood pressure waveforms).

At the end of the study, the dogs were returned to the pool of instrumented animals.

### 6.3. Treatment and Experimental Design

| Experimental Day                                                                                                                                            | Treatment <sup>a</sup> | Dose (mg/kg) | Volume (mL/kg) | Animal numbers (males)    |
|-------------------------------------------------------------------------------------------------------------------------------------------------------------|------------------------|--------------|----------------|---------------------------|
| 25 <sup>th</sup> March 2008                                                                                                                                 | Vehicle                | 0            | 10             | 2057 - 2482 - 2552 - 2539 |
| 27 <sup>th</sup> March 2008                                                                                                                                 | Fexinidazole           | 100          |                |                           |
| 31 <sup>st</sup> March 2008                                                                                                                                 |                        | 300          |                |                           |
| 4 <sup>th</sup> April 2008                                                                                                                                  |                        | 1000         |                |                           |
| a) Animals were treated following an escalating dose design with an adequate washout (at least 5 half lives of the longer lasting metabolite) between doses |                        |              |                |                           |

Doses of 100, 300 and 1000 mg/kg of fexinidazole were selected based on the results of a repeated (7-day) toxicity study in the same species (0339-2007). In this study, the top dose of 2000 mg/kg was well tolerated and did not cause any meaningful toxicological change. On the other hand, plasma levels determined as part of a 3-day toxicity study (study 0513-2007) showed that systemic exposure (both in terms of C<sub>max</sub> and AUC) did not increase when the dose was increased from 500 to 1000 mg/kg/day.

The oral route is that intended for clinical administration.

#### 6.3.1. Clinical Observation

Animals were monitored via a CCTV system and physically inspected 24 hours post-dosing. Body weights are not reported here but they are archived with the study file.

#### 6.3.2. Telemetry recordings

On the day of dosing, telemetry signals from each animal were collected continuously from at least one hour pre-dose to at least 24 hours after treatment.

The following parameters were calculated:

- Systolic blood pressure (SBP, mmHg)
- Diastolic blood pressure (DBP, mmHg)
- Average blood pressure (ABP, mmHg)
- Heart rate (HR, bpm, from the blood pressure signal)
- ECG intervals (RR, PR, QRS and QT, ms)
- Body temperature (BT, °C)

All the above-mentioned parameters were extracted automatically by the Notocord HEM acquisition software (Notocord, Croissy-sur-Seine, France) as the average value of 10-second recordings. Data were extracted every 10 minutes from 1 hour to 10 minutes before treatment, every 15 minutes from treatment to 4 hours later and every 30 minutes from 4 to 7 hours after treatment. Basal values (time "0") are the mean of pre-treatment values (from 1 hour to 10 minutes before treatment). Data from 7 to 24 hours after treatment were not extracted, but they are archived with the study file.

ECG interval measurements were inspected on the computer screen for the correct placement of markers. QT intervals were corrected for heart rate using the covariate analysis formula  $\{\ln(QT_{ca}) = \ln(QT) - (-0.229314) * [\ln(HR) - \ln(HR_m)]\}$ , where  $HR_m=100$  [1, 2].



**6.3.2.1. Deviations from Protocol**

Data for animal No. 2482 at 60 minutes following vehicle administration are not available due to unreadable waveforms (probably caused by environmental interferences on the radio signal). This data point in Appendix 1 is reported as “-“.

However, the lack of this single data point was deemed not to have any influence on the interpretation of the results of the study.

**7. ARCHIVING**

The original protocol and amendments, all raw data, supporting documents, and the final report with original signatures were filed in the Archives of Accelera, Nerviano Medical Sciences S.r.l., Nerviano (Italy), where they will be kept for the period of time agreed with the Sponsor (at least 3 years) after which the Sponsor will be contacted for instructions regarding dispatch or disposal of the material.

A copy of the protocol and amendments, the report with original signatures, a reserve sample and all relevant original documentation on the test item were filed by the Sponsor.

**8. STUDY PERSONNEL**

|  |  |
|--|--|
|  |  |
|  |  |
|  |  |
|  |  |
|  |  |
|  |  |
|  |  |
|  |  |
|  |  |
|  |  |

**9. RESULTS AND DISCUSSION**

Mean ( $\pm$  S.E.M.) absolute values and changes from pre-treatment (time 0) for cardiovascular parameters, ECG intervals and body temperature are given in Figures 1-10. Individual data are reported in Appendix 1.1-1.4.

**9.1. Cardiovascular Parameters****9.1.1. Arterial Blood Pressure and Heart Rate**

No meaningful changes were observed in systolic, diastolic and mean blood pressure following oral administration of fexinidazole up to the dose of 1000 mg/kg.

A moderate, transient increase in heart rate was observed from the dose of 300 mg/kg in the first 30 minutes following administration (peak increase of +40 beats/min at 300 mg/kg and +54 beats/min at 1000 mg/kg). Due to its moderate extent and short duration, this change is not deemed to have an important physiological significance.

### 9.1.2. ECG

The RR interval showed changes in accordance with the changes observed in heart rate: a moderate decrease at doses of 300 and 1000 mg/kg in the first 30 minutes following treatment.

No changes were observed in PR and QRS intervals.

The QT interval was slightly prolonged (about 40 msec) from 210 to 330 minutes following administration of the dose of 100 mg/kg, but no prolongation was observed following higher doses of 300 and 1000 mg/kg. The same prolongation was still present when the QT was corrected for the heart rate with the covariate formula. Because of the absence of effects at higher doses, the QT prolongation observed at the low dose of 100 mg/kg is deemed not to be a direct consequence of the treatment.

### 9.2. Body Temperature

Body temperature was moderately increased, in a dose-dependent manner, between 2 and 5 hours after treatment at doses of 300 and 1000 mg/kg (+0.6 and +1.0°C, respectively).

## 10. CONCLUSIONS

Oral administration of fexinidazole at doses of 100, 300 and 1000 mg/kg to beagle dogs did not have any meaningful effect on blood pressure, heart rate and ECG intervals, including the QT interval. Body temperature was moderately increased in a dose-dependent manner from the dose of 300 mg/kg between 2 and 5 hours after administration.

In the conditions of this study, the no-observed-effect-level (NOEL) for fexinidazole on cardiovascular parameters and ECG intervals is 1000 mg/kg. The NOEL on body temperature is 100 mg/kg.

## 11. REFERENCES

1. Nerviano Medical Sciences internal report 0081-2005-R “Sotalol: Evaluation of a positive control for QT prolongation in conscious beagle dogs”
2. Cooper M, Branch C, Bastianse R, Flegel M, Lancaster C, Packwood W, et al. Mathematical corrections for the inverse relationship between QT interval and heart rate in conscious beagle dogs and cynomolgus monkeys. *Toxicol Sci.* 2001; 60: A1251

## 12. FIGURES

**Figure 1. Systolic arterial pressure**

**A. Absolute values**

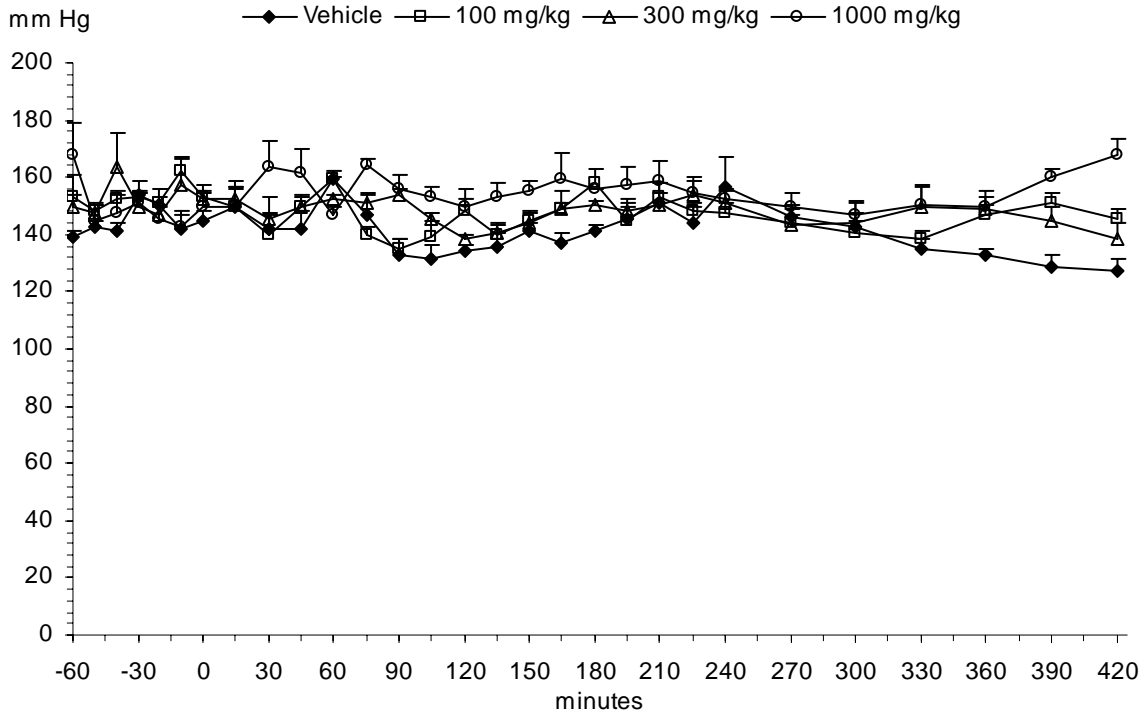

**B. Changes from pre-treatment values**

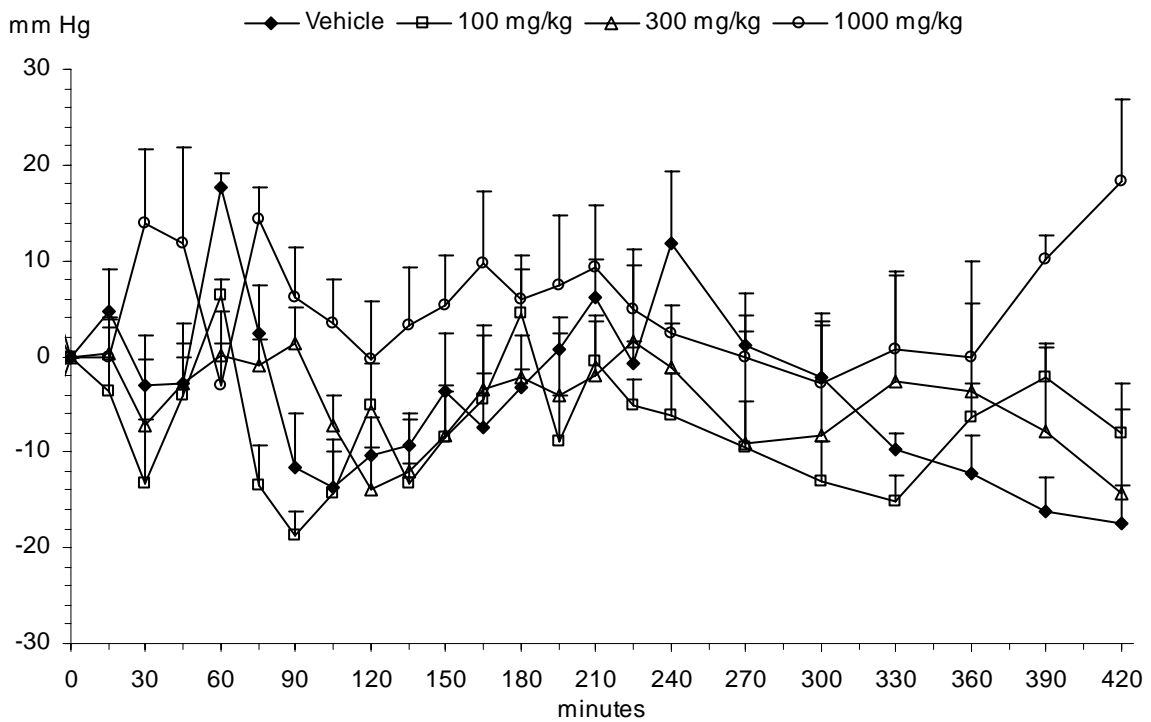

**Figure 2. Diastolic arterial pressure**

**A. Absolute values**

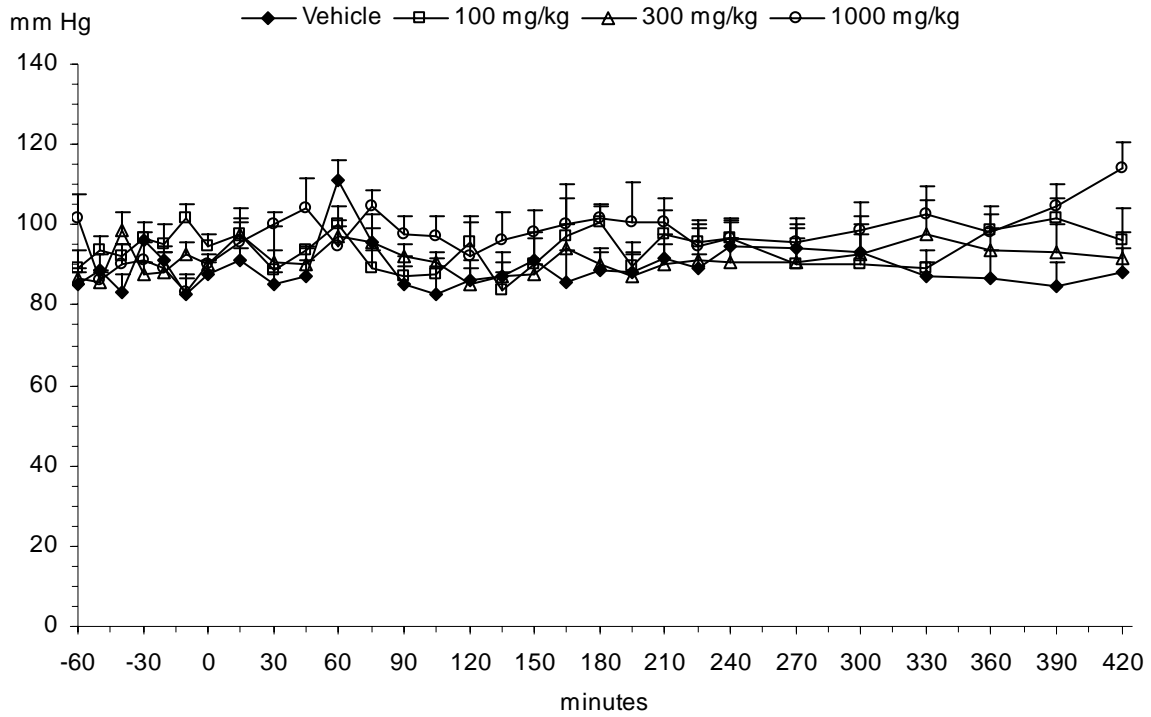

**B. Changes from pre-treatment values**

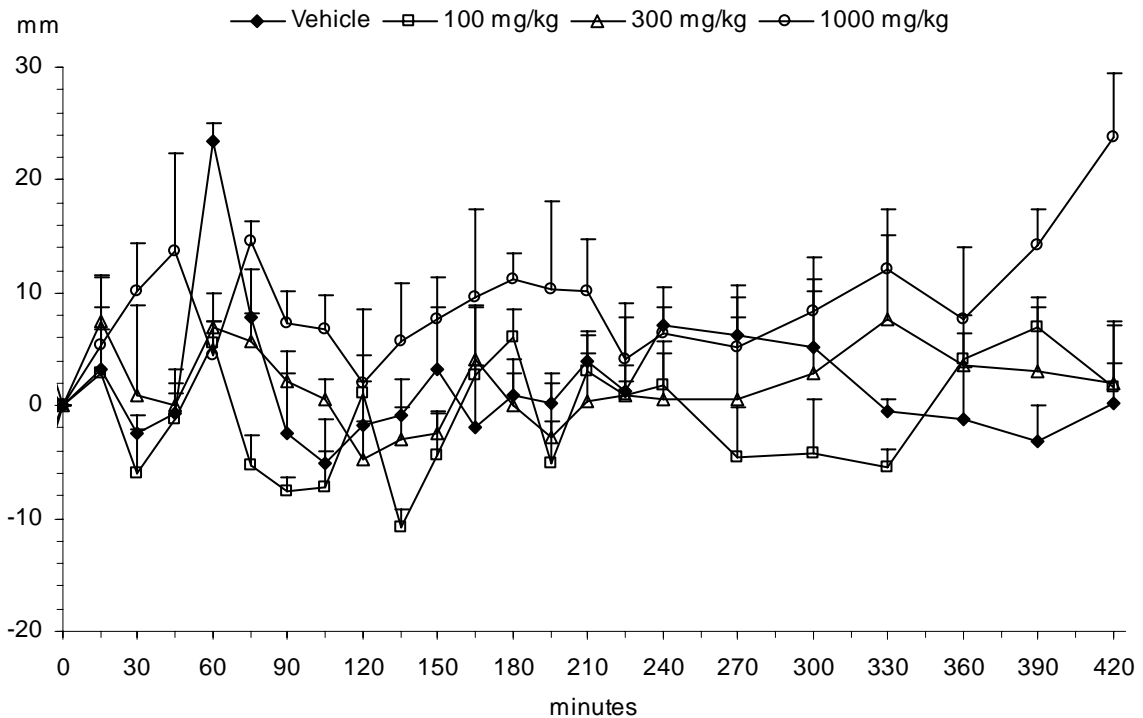

**Figure 3. Mean arterial pressure**

**A. Absolute values**

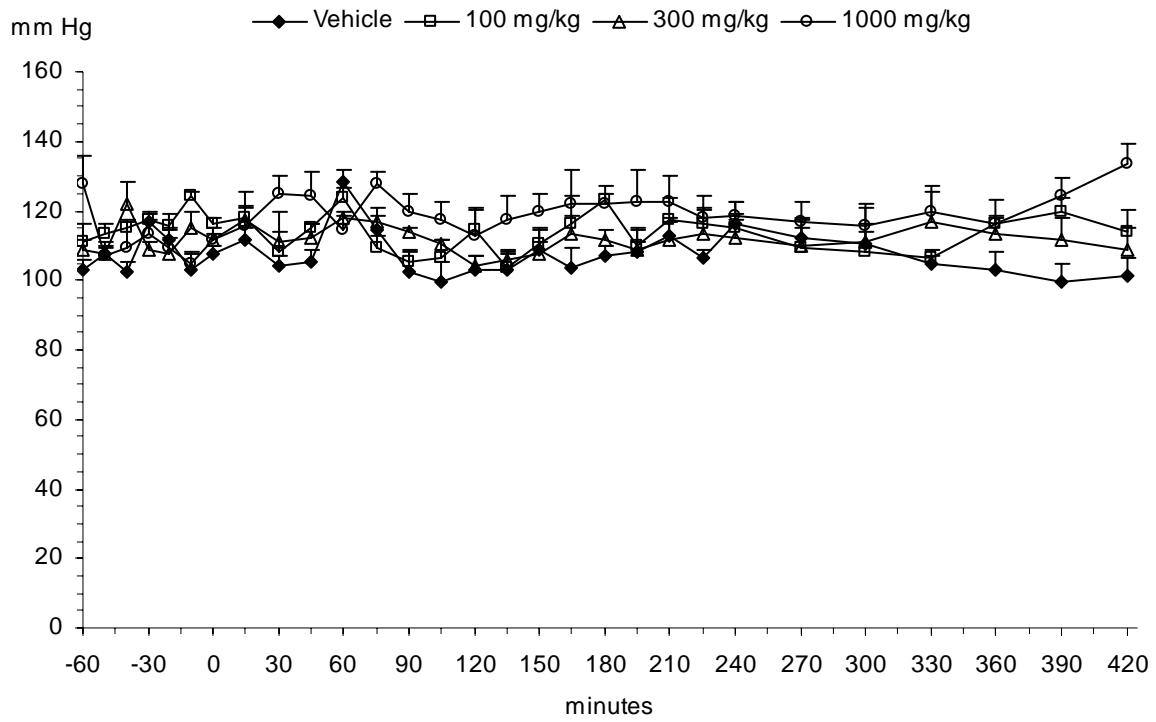

**B. Changes from pre-treatment values**

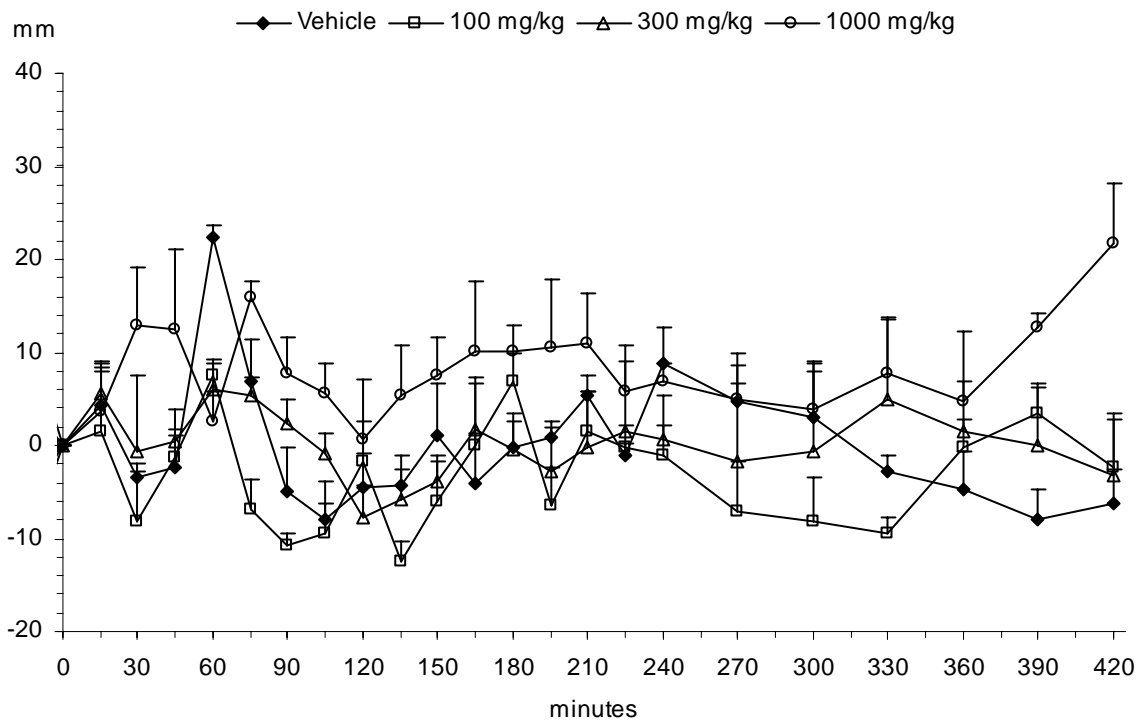

**Figure 4. Heart rate**

**A. Absolute values**

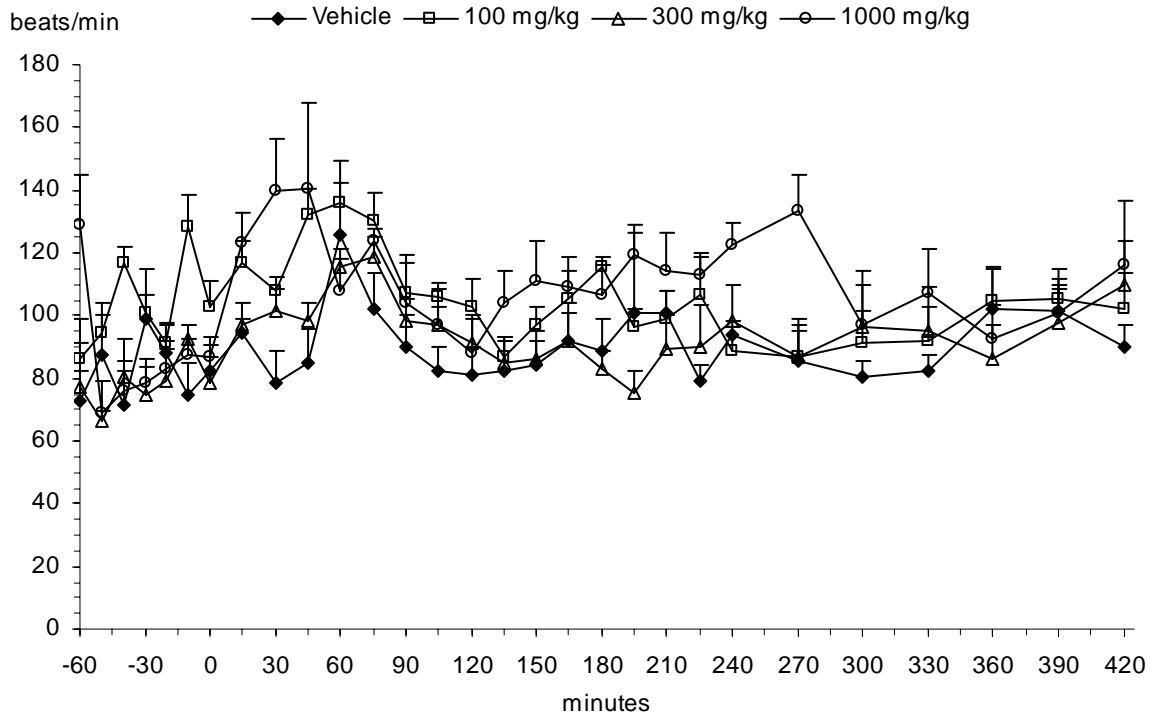

**B. Changes from pre-treatment values**

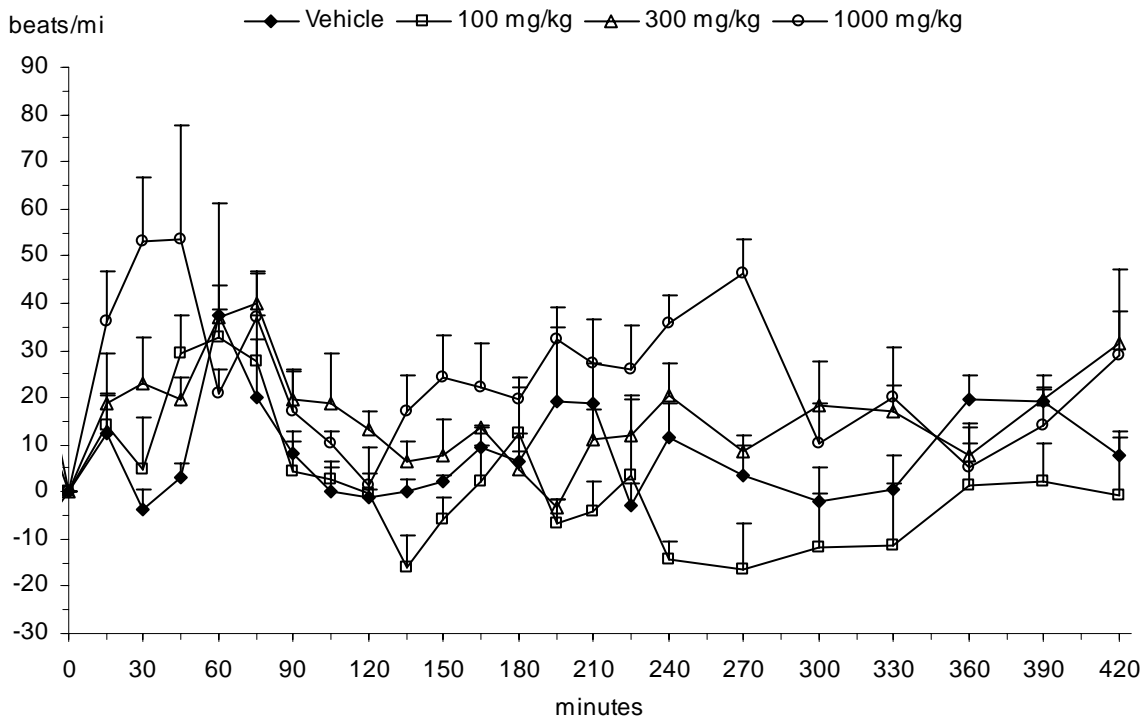

**Figure 5. RR interval**

**A. Absolute values**

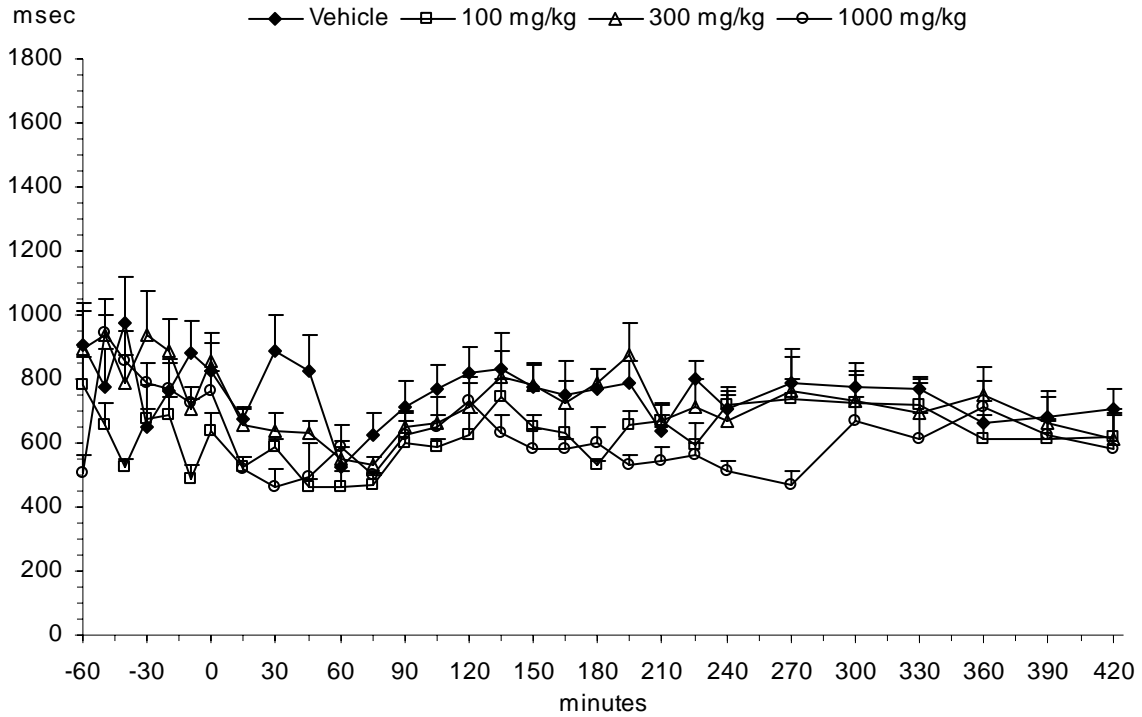

**B. changes from pre-treatment values**

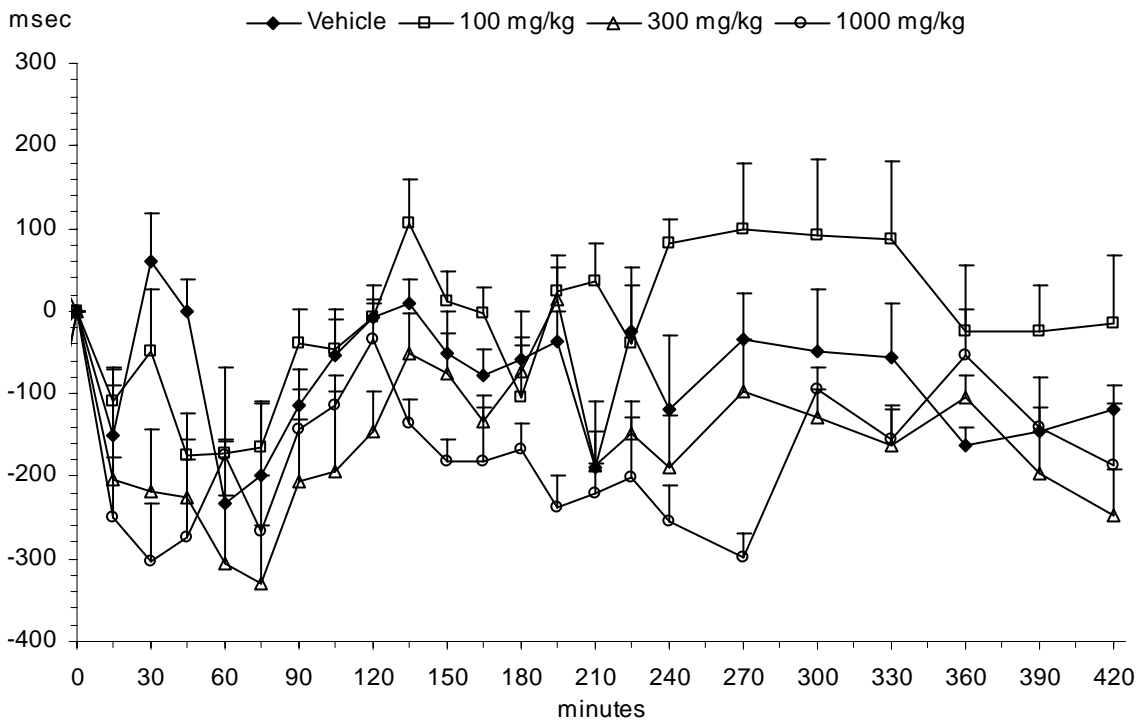



**Figure 6. PR interval**

**A. Absolute values**

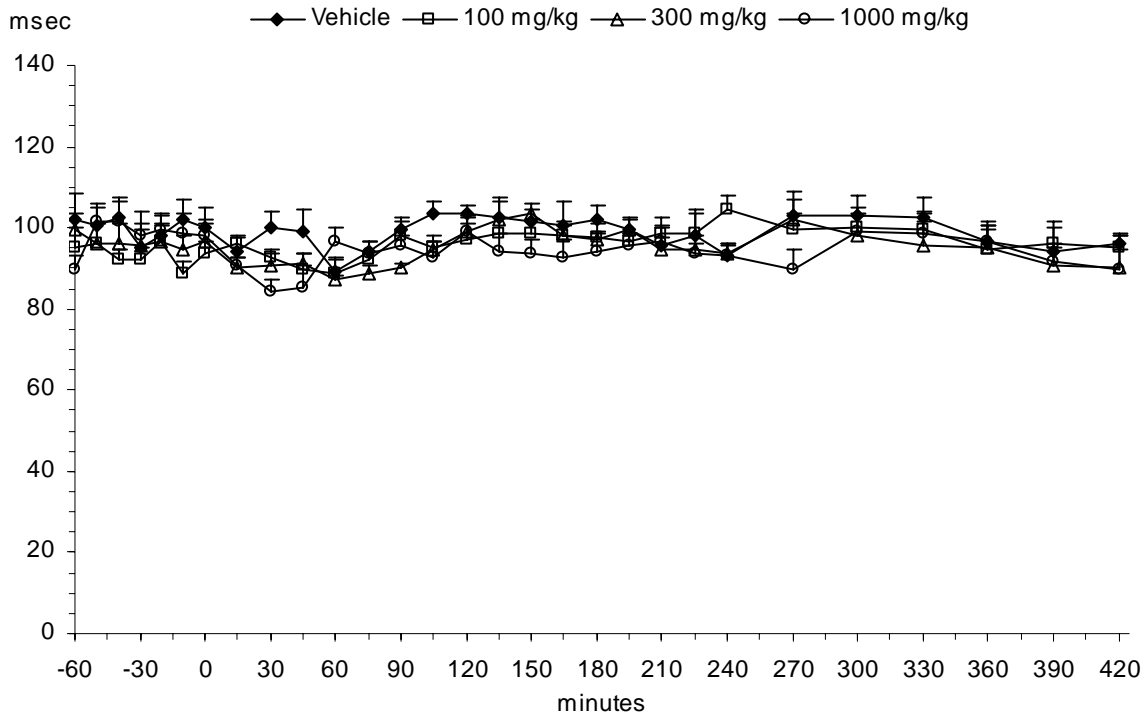

**B. Changes from pre-treatment values**

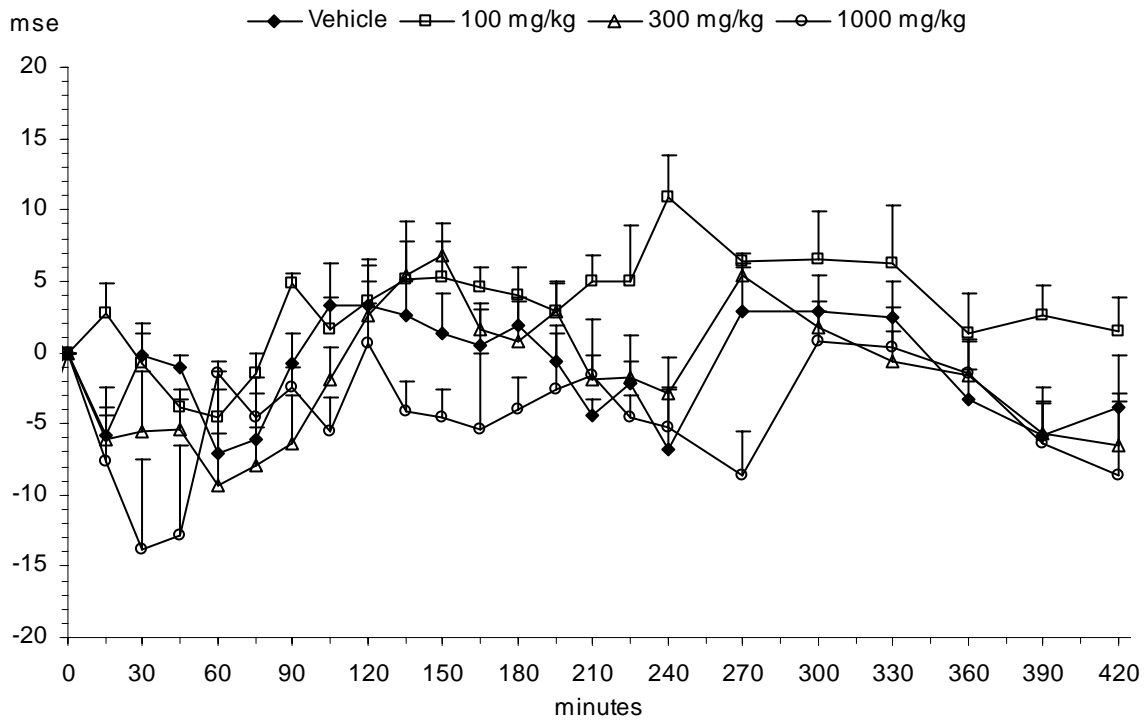

**Figure 7. QRS interval**

**A. Absolute values**

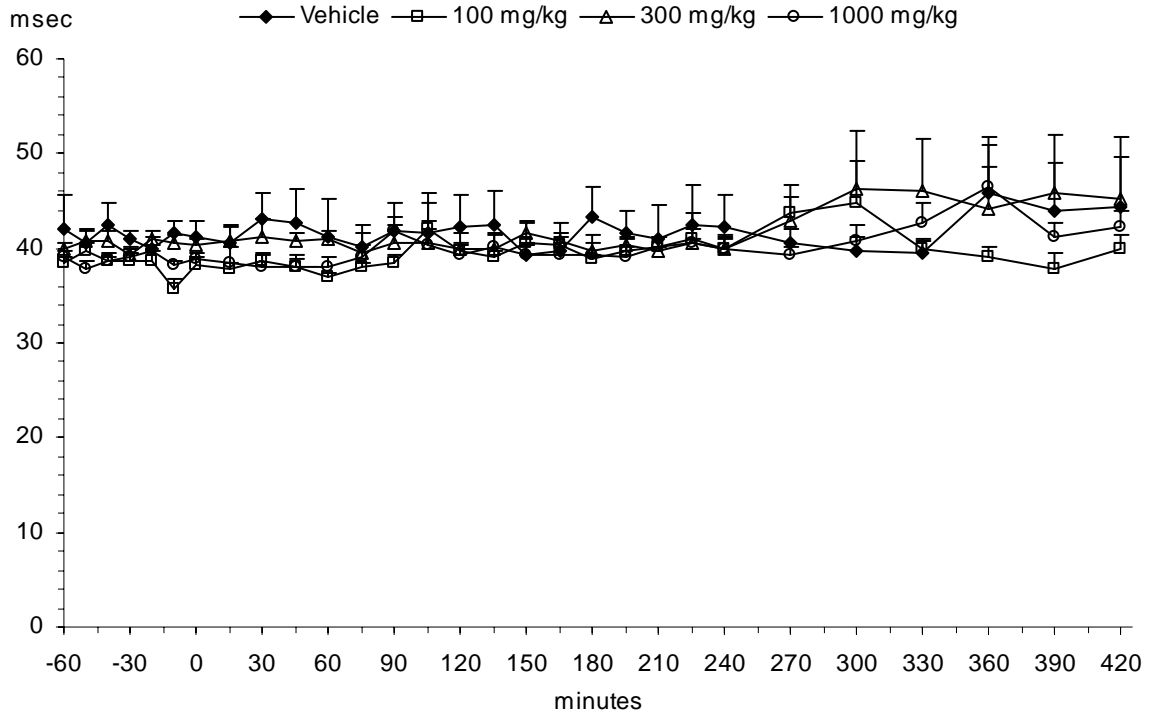

**B. Changes from pre-treatment values**

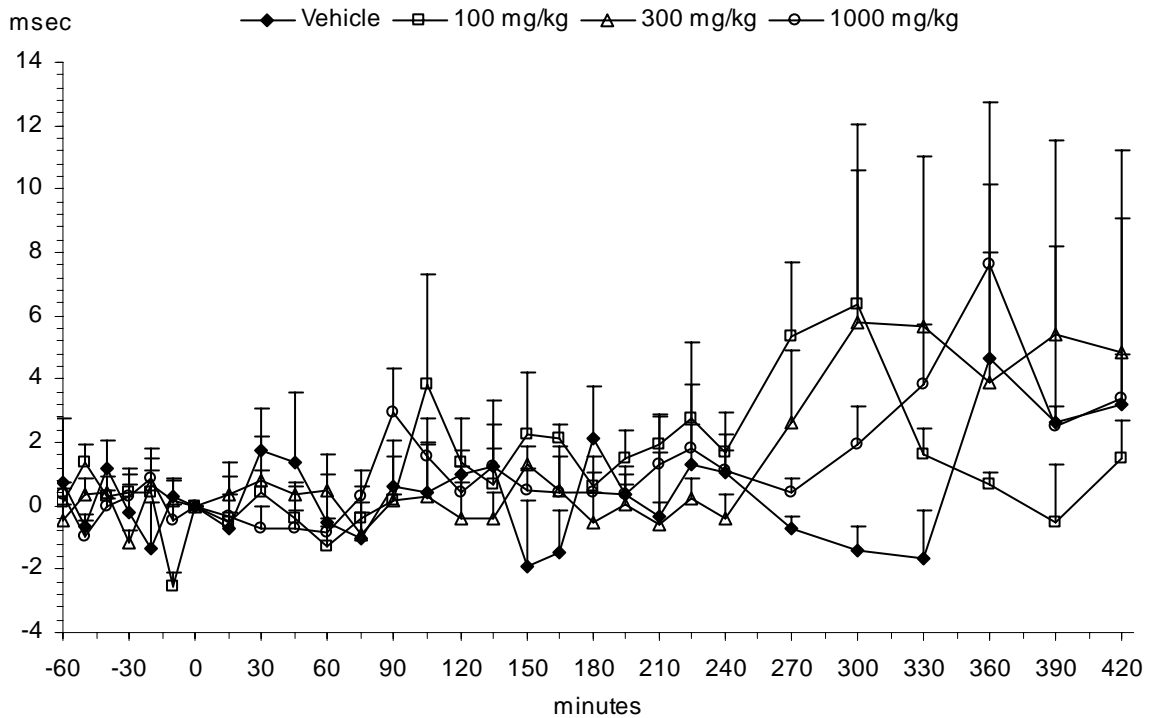

**Figure 8. Uncorrected QT interval**

**A. Absolute values**

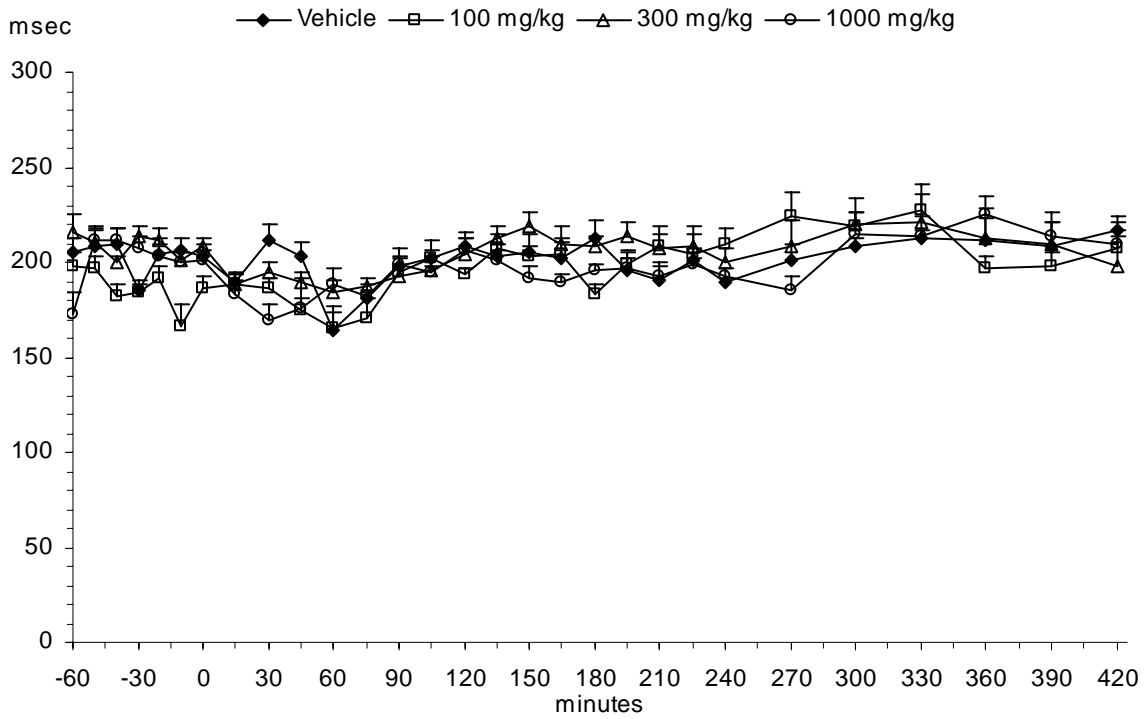

**B. Changes from pre-treatment values**

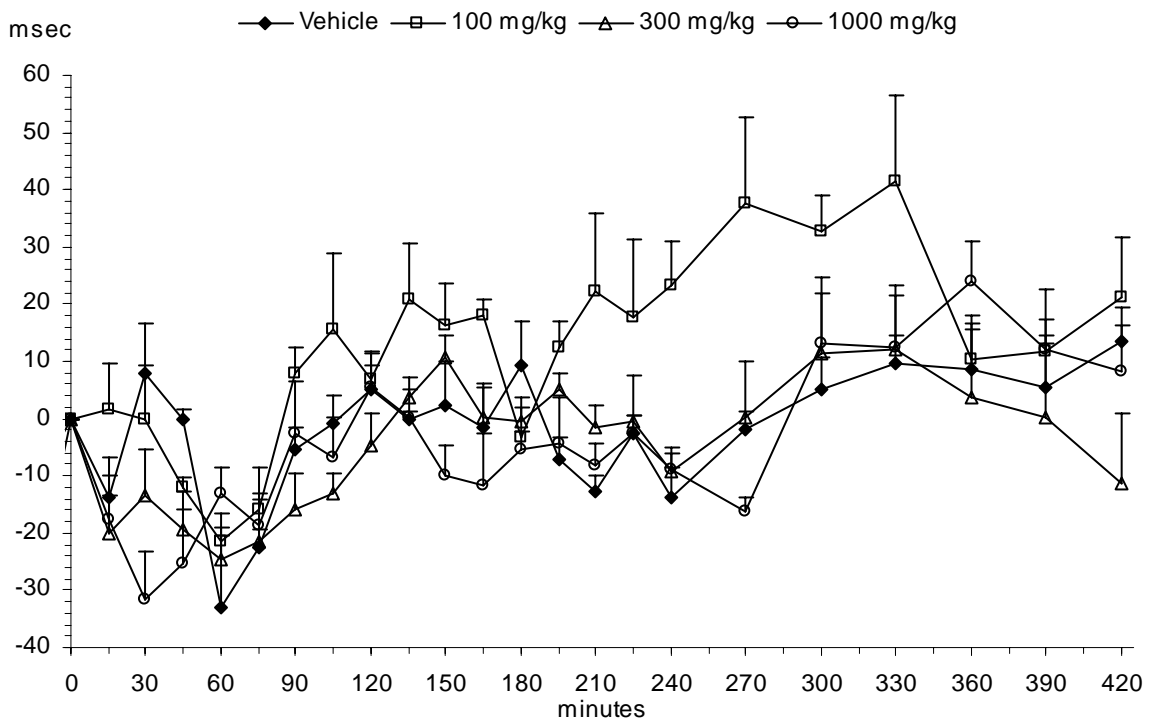

**Figure 9. Corrected QT interval (covariate correction, QTca)**

**A. Absolute values**

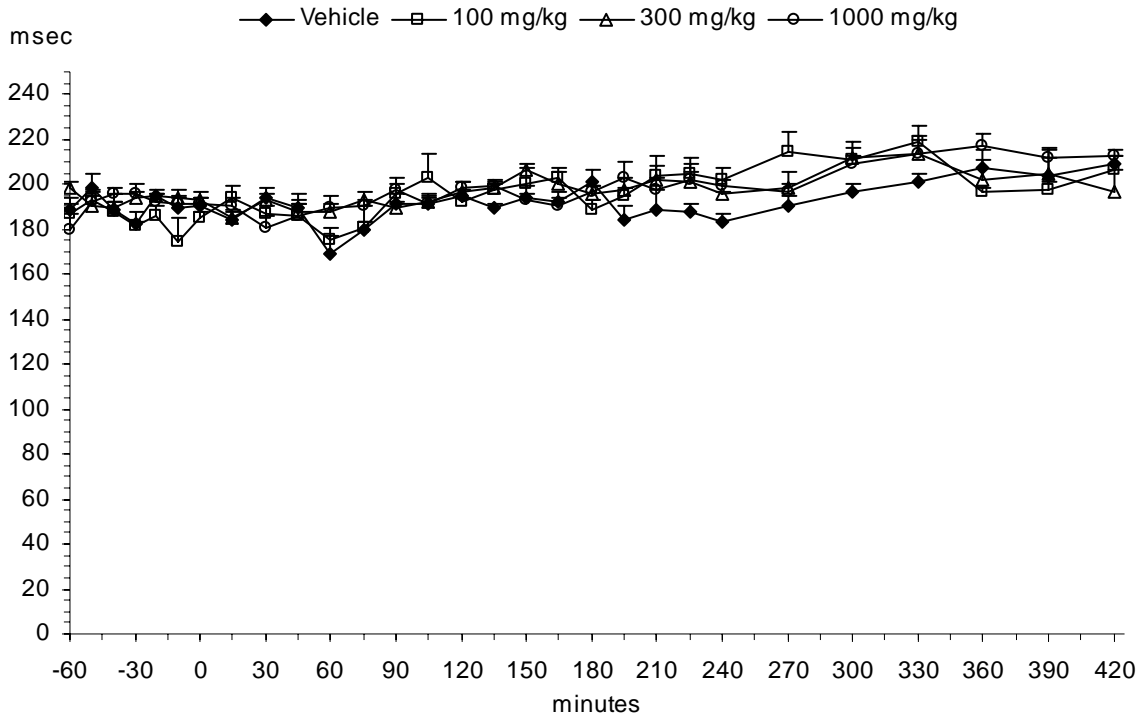

**B. Changes from pre-treatment values**

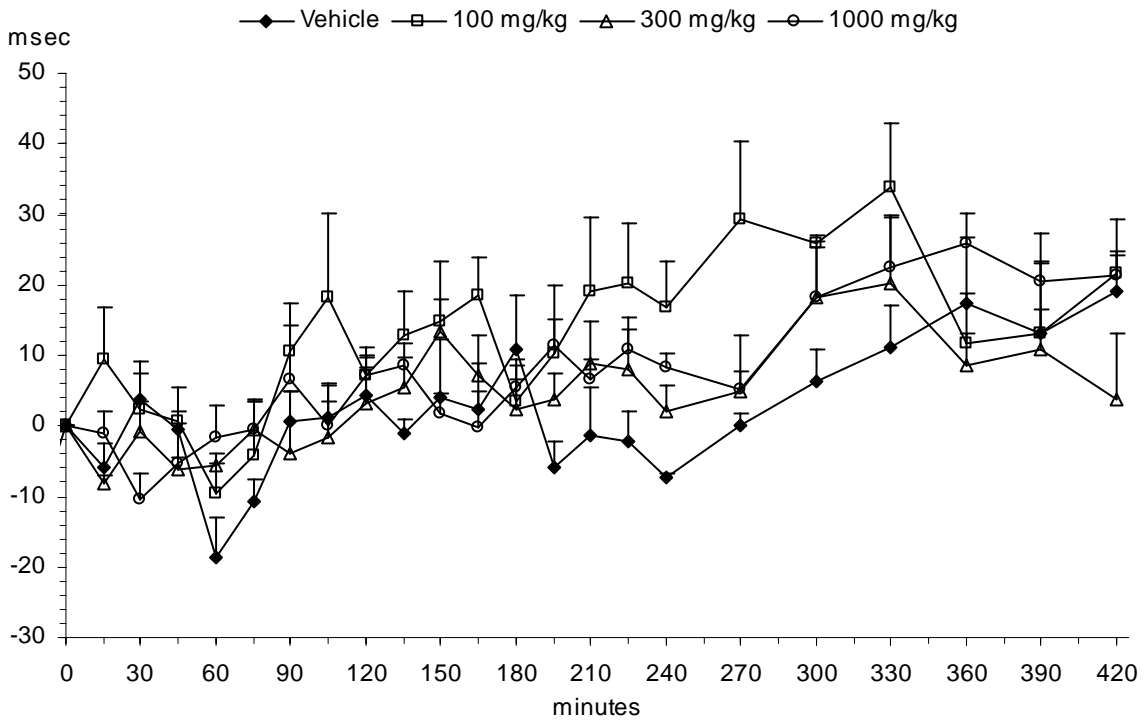

**Figure 10. Body temperature**

**A. Absolute values**

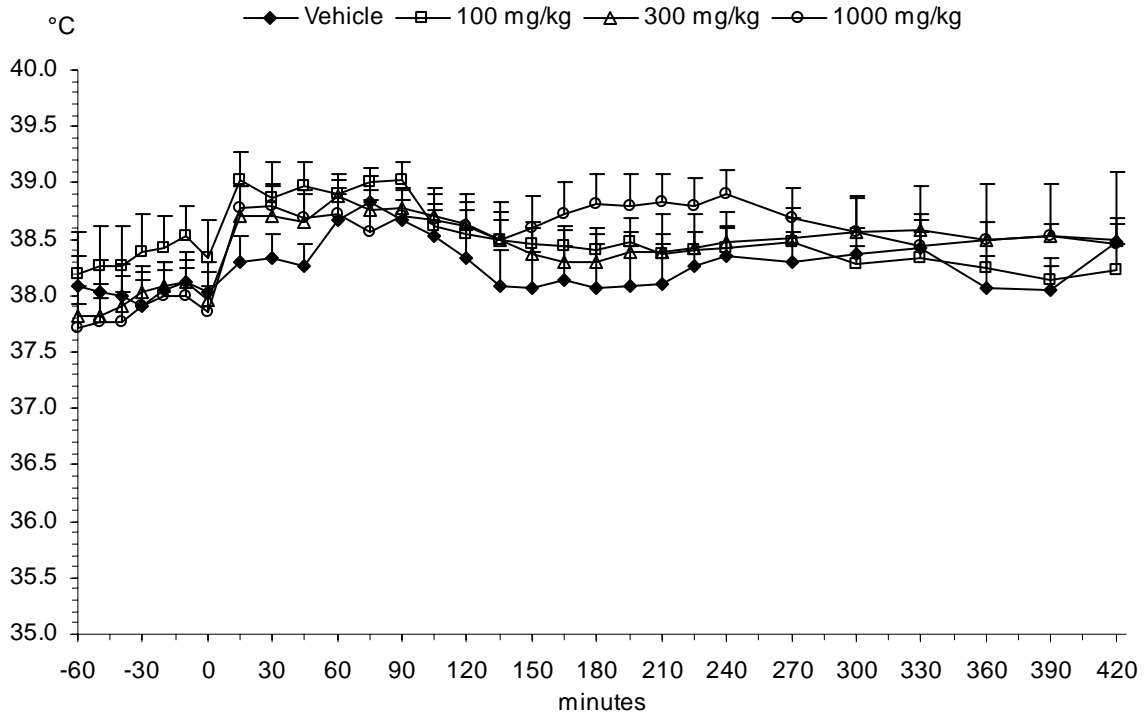

**B. Changes from pre-treatment values**

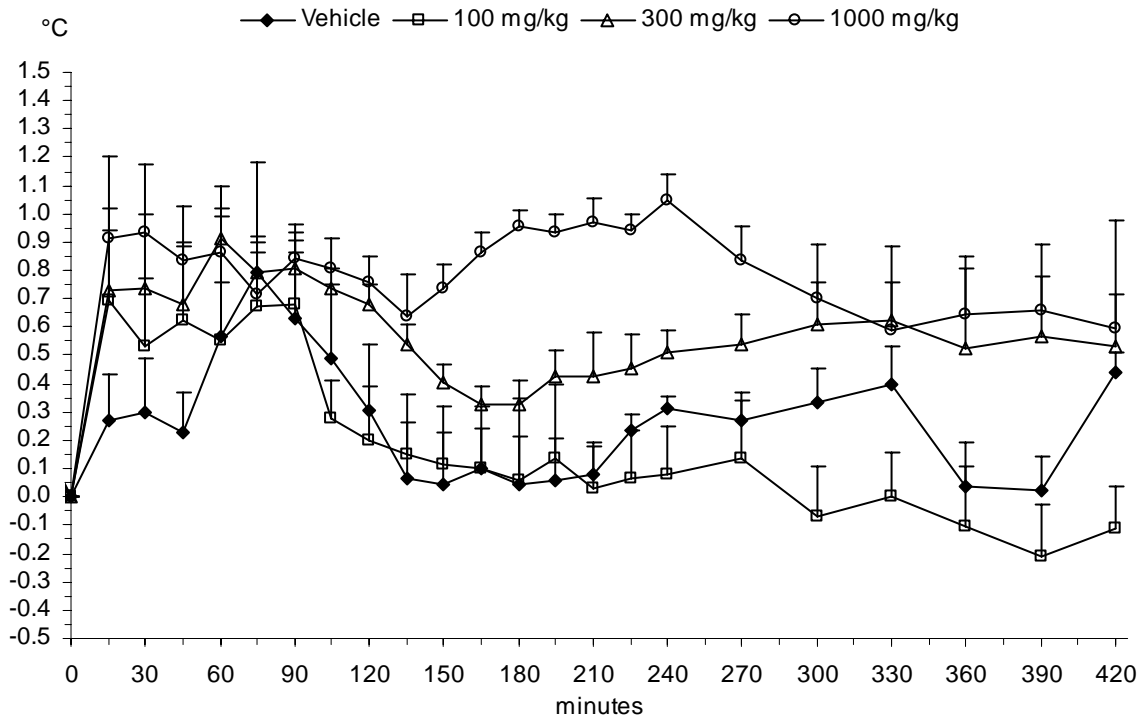

## APPENDICES

***Appendix 1 Study data listing***

CONFIDENTIAL

Appendix 1.1 – Group 1, Vehicle PO

Systolic blood pressure (mm Hg)

| Time from dose (min) | 2482 |          | 2539 |          | 2552 |          | 2057 |          | Absolute Mean ± S.D. | Δ from 0 Mean ± S.D. | N |
|----------------------|------|----------|------|----------|------|----------|------|----------|----------------------|----------------------|---|
|                      | Abs. | Δ from 0 | Abs. | Δ from 0 | Abs. | Δ from 0 | Abs. | Δ from 0 |                      |                      |   |
| -60                  | 139  | -15      | 144  | 0        | 134  | -2       | 139  | -6       | 139 ± 4.0            | -6 ± 6.4             | 4 |
| -50                  | 144  | -9       | 141  | -3       | 138  | 2        | 148  | 3        | 143 ± 4.2            | -2 ± 5.7             | 4 |
| -40                  | 149  | -5       | 140  | -4       | 136  | -1       | 140  | -5       | 141 ± 5.5            | -4 ± 2.0             | 4 |
| -30                  | 165  | 11       | 157  | 13       | 141  | 5        | 152  | 7        | 154 ± 9.9            | 9 ± 3.7              | 4 |
| -20                  | 166  | 12       | 151  | 7        | 138  | 1        | 146  | 1        | 150 ± 11.9           | 5 ± 5.5              | 4 |
| -10                  | 159  | 5        | 132  | -12      | 133  | -4       | 144  | 0        | 142 ± 12.7           | -3 ± 7.4             | 4 |
| 0                    | 154  | 0        | 144  | 0        | 137  | 0        | 145  | 0        | 145 ± 6.9            | 0 ± 0.0              | 4 |
| 15                   | 159  | 5        | 158  | 14       | 129  | -7       | 152  | 7        | 150 ± 13.8           | 5 ± 9.0              | 4 |
| 30                   | 158  | 5        | 141  | -3       | 130  | -7       | 138  | -6       | 142 ± 11.9           | -3 ± 5.3             | 4 |
| 45                   | 151  | -3       | 140  | -4       | 124  | -13      | 153  | 8        | 142 ± 13.2           | -3 ± 8.5             | 4 |
| 60                   | -    | -        | 159  | 15       | 155  | 18       | 165  | 20       | 159 ± 5.0            | 18 ± 2.5             | 3 |
| 75                   | 163  | 9        | 133  | -11      | 136  | -1       | 157  | 12       | 147 ± 14.6           | 2 ± 10.2             | 4 |
| 90                   | 143  | -11      | 122  | -22      | 141  | 4        | 127  | -18      | 133 ± 10.1           | -12 ± 11.3           | 4 |
| 105                  | 137  | -16      | 118  | -26      | 128  | -9       | 142  | -3       | 131 ± 10.4           | -14 ± 9.8            | 4 |
| 120                  | 136  | -18      | 130  | -14      | 138  | 1        | 134  | -11      | 134 ± 3.3            | -10 ± 8.1            | 4 |
| 135                  | 143  | -11      | 128  | -16      | 127  | -10      | 144  | -1       | 136 ± 9.2            | -9 ± 6.4             | 4 |
| 150                  | 139  | -14      | 135  | -9       | 150  | 13       | 140  | -5       | 141 ± 6.4            | -4 ± 12.1            | 4 |
| 165                  | 136  | -18      | 129  | -15      | 143  | 7        | 141  | -4       | 137 ± 6.3            | -8 ± 11.3            | 4 |
| 180                  | 145  | -9       | 142  | -2       | 138  | 1        | 142  | -3       | 141 ± 3.1            | -3 ± 3.9             | 4 |
| 195                  | 157  | 3        | 153  | 9        | 132  | -4       | 140  | -5       | 146 ± 11.5           | 1 ± 6.6              | 4 |
| 210                  | 168  | 15       | 147  | 3        | 133  | -3       | 155  | 10       | 151 ± 14.6           | 6 ± 7.9              | 4 |
| 225                  | 158  | 5        | 140  | -4       | 132  | -5       | 146  | 1        | 144 ± 11.1           | -1 ± 4.4             | 4 |
| 240                  | 186  | 33       | 141  | -3       | 145  | 8        | 154  | 9        | 157 ± 20.4           | 12 ± 14.9            | 4 |
| 270                  | 154  | 0        | 138  | -6       | 146  | 9        | 146  | 1        | 146 ± 6.4            | 1 ± 6.1              | 4 |
| 300                  | 141  | -13      | 137  | -7       | 135  | -1       | 157  | 12       | 143 ± 10.0           | -2 ± 10.7            | 4 |
| 330                  | 140  | -14      | 136  | -8       | 126  | -11      | 139  | -6       | 135 ± 6.5            | -10 ± 3.4            | 4 |
| 360                  | 136  | -18      | 126  | -18      | 136  | -1       | 132  | -13      | 133 ± 4.6            | -12 ± 8.2            | 4 |
| 390                  | 135  | -19      | 120  | -24      | 122  | -15      | 138  | -7       | 129 ± 9.1            | -16 ± 7.3            | 4 |
| 420                  | 133  | -20      | 117  | -27      | 126  | -11      | 133  | -12      | 127 ± 7.8            | -18 ± 7.9            | 4 |

“-“ Data not available (See Section 6.3.2.1. Deviations from Protocol)



CONFIDENTIAL

Appendix 1.1 – Group 1, Vehicle PO

Diastolic blood pressure (mm Hg)

| Time from dose (min) | 2482 |          | 2539 |          | 2552 |          | 2057 |          | Absolute Mean ± S.D. | Δ from 0 Mean ± S.D. | N |
|----------------------|------|----------|------|----------|------|----------|------|----------|----------------------|----------------------|---|
|                      | Abs. | Δ from 0 | Abs. | Δ from 0 | Abs. | Δ from 0 | Abs. | Δ from 0 |                      |                      |   |
| -60                  | 85   | -4       | 77   | -3       | 92   | 1        | 88   | -4       | 85 ± 6.2             | -3 ± 2.1             | 4 |
| -50                  | 87   | -2       | 78   | -2       | 96   | 5        | 94   | 2        | 89 ± 8.1             | 1 ± 3.2              | 4 |
| -40                  | 79   | -9       | 73   | -7       | 94   | 3        | 86   | -6       | 83 ± 8.8             | -5 ± 5.1             | 4 |
| -30                  | 95   | 7        | 98   | 18       | 92   | 0        | 101  | 9        | 96 ± 3.9             | 8 ± 7.2              | 4 |
| -20                  | 96   | 8        | 85   | 6        | 90   | -1       | 92   | 0        | 91 ± 4.6             | 3 ± 4.3              | 4 |
| -10                  | 89   | 0        | 67   | -12      | 84   | -7       | 90   | -2       | 83 ± 10.5            | -5 ± 5.7             | 4 |
| 0                    | 88   | 0        | 80   | 0        | 91   | 0        | 92   | 0        | 88 ± 5.5             | 0 ± 0.0              | 4 |
| 15                   | 87   | -2       | 90   | 10       | 88   | -4       | 100  | 9        | 91 ± 6.3             | 3 ± 6.9              | 4 |
| 30                   | 87   | -1       | 78   | -2       | 91   | 0        | 85   | -7       | 85 ± 5.4             | -2 ± 3.1             | 4 |
| 45                   | 82   | -6       | 80   | 0        | 88   | -3       | 98   | 6        | 87 ± 8.2             | -1 ± 5.3             | 4 |
| 60                   | -    | -        | 101  | 21       | 117  | 26       | 115  | 24       | 111 ± 9.1            | 23 ± 2.7             | 3 |
| 75                   | 103  | 15       | 76   | -4       | 97   | 6        | 106  | 14       | 96 ± 13.6            | 8 ± 8.7              | 4 |
| 90                   | 90   | 1        | 71   | -9       | 102  | 11       | 79   | -12      | 85 ± 13.3            | -2 ± 10.4            | 4 |
| 105                  | 84   | -4       | 63   | -17      | 90   | -2       | 94   | 2        | 83 ± 13.5            | -5 ± 8.0             | 4 |
| 120                  | 82   | -6       | 76   | -4       | 101  | 10       | 85   | -7       | 86 ± 10.5            | -2 ± 7.7             | 4 |
| 135                  | 87   | -1       | 70   | -10      | 95   | 4        | 95   | 4        | 87 ± 11.9            | -1 ± 6.4             | 4 |
| 150                  | 84   | -4       | 76   | -4       | 111  | 20       | 93   | 1        | 91 ± 14.8            | 3 ± 11.2             | 4 |
| 165                  | 77   | -11      | 69   | -10      | 104  | 13       | 93   | 1        | 86 ± 15.4            | -2 ± 11.2            | 4 |
| 180                  | 81   | -7       | 81   | 1        | 100  | 9        | 93   | 1        | 89 ± 9.1             | 1 ± 6.5              | 4 |
| 195                  | 86   | -2       | 75   | -4       | 99   | 8        | 91   | 0        | 88 ± 9.8             | 0 ± 5.3              | 4 |
| 210                  | 92   | 4        | 82   | 2        | 96   | 5        | 97   | 5        | 92 ± 7.0             | 4 ± 1.6              | 4 |
| 225                  | 88   | -1       | 80   | 0        | 95   | 3        | 94   | 2        | 89 ± 6.9             | 1 ± 1.9              | 4 |
| 240                  | 94   | 5        | 78   | -2       | 105  | 14       | 103  | 11       | 95 ± 12.2            | 7 ± 6.9              | 4 |
| 270                  | 88   | -1       | 83   | 3        | 111  | 20       | 94   | 2        | 94 ± 12.1            | 6 ± 9.1              | 4 |
| 300                  | 84   | -5       | 80   | 0        | 99   | 8        | 109  | 17       | 93 ± 13.7            | 5 ± 9.8              | 4 |
| 330                  | 86   | -3       | 79   | -1       | 92   | 0        | 93   | 2        | 87 ± 6.7             | 0 ± 1.9              | 4 |
| 360                  | 85   | -4       | 70   | -10      | 103  | 12       | 89   | -3       | 87 ± 13.5            | -1 ± 9.2             | 4 |
| 390                  | 87   | -2       | 68   | -12      | 88   | -3       | 96   | 4        | 85 ± 11.7            | -3 ± 6.5             | 4 |
| 420                  | 87   | -1       | 71   | -9       | 99   | 7        | 96   | 4        | 88 ± 12.5            | 0 ± 7.2              | 4 |

“-“ Data not available (See Section 6.3.2.1. Deviations from Protocol)

CONFIDENTIAL

Appendix 1.1 – Group 1, Vehicle PO

Mean blood pressure (mm Hg)

| Time from dose (min) | 2482 |          | 2539 |          | 2552 |          | 2057 |          | Absolute Mean ± S.D. | Δ from 0 Mean ± S.D. | N |
|----------------------|------|----------|------|----------|------|----------|------|----------|----------------------|----------------------|---|
|                      | Abs. | Δ from 0 | Abs. | Δ from 0 | Abs. | Δ from 0 | Abs. | Δ from 0 |                      |                      |   |
| -60                  | 105  | -7       | 95   | -6       | 108  | 0        | 104  | -5       | 103 ± 5.5            | -4 ± 3.1             | 4 |
| -50                  | 107  | -5       | 101  | 0        | 111  | 3        | 111  | 2        | 108 ± 4.6            | 0 ± 3.4              | 4 |
| -40                  | 103  | -9       | 95   | -6       | 110  | 1        | 102  | -7       | 102 ± 5.9            | -5 ± 4.5             | 4 |
| -30                  | 120  | 9        | 119  | 18       | 111  | 2        | 118  | 9        | 117 ± 4.5            | 10 ± 6.5             | 4 |
| -20                  | 122  | 10       | 108  | 6        | 108  | -1       | 110  | 1        | 112 ± 6.7            | 4 ± 4.8              | 4 |
| -10                  | 114  | 2        | 89   | -12      | 103  | -6       | 107  | -2       | 103 ± 10.6           | -4 ± 6.3             | 4 |
| 0                    | 112  | 0        | 101  | 0        | 108  | 0        | 109  | 0        | 108 ± 4.4            | 0 ± 0.0              | 4 |
| 15                   | 113  | 1        | 114  | 13       | 103  | -6       | 117  | 9        | 112 ± 6.5            | 4 ± 8.3              | 4 |
| 30                   | 112  | 0        | 98   | -3       | 105  | -4       | 101  | -7       | 104 ± 6.0            | -4 ± 3.1             | 4 |
| 45                   | 105  | -7       | 99   | -2       | 101  | -8       | 116  | 7        | 105 ± 7.5            | -2 ± 6.9             | 4 |
| 60                   | -    | -        | 121  | 20       | 130  | 22       | 134  | 25       | 128 ± 6.3            | 22 ± 2.6             | 3 |
| 75                   | 126  | 14       | 98   | -3       | 111  | 3        | 124  | 15       | 114 ± 12.8           | 7 ± 8.9              | 4 |
| 90                   | 109  | -3       | 90   | -11      | 116  | 7        | 96   | -13      | 103 ± 11.8           | -5 ± 9.2             | 4 |
| 105                  | 103  | -9       | 82   | -19      | 103  | -5       | 110  | 1        | 100 ± 11.8           | -8 ± 8.3             | 4 |
| 120                  | 102  | -10      | 94   | -7       | 114  | 6        | 102  | -7       | 103 ± 8.3            | -4 ± 7.1             | 4 |
| 135                  | 107  | -5       | 89   | -12      | 106  | -2       | 111  | 3        | 103 ± 9.6            | -4 ± 6.1             | 4 |
| 150                  | 104  | -8       | 97   | -4       | 126  | 17       | 108  | -1       | 109 ± 12.0           | 1 ± 11.0             | 4 |
| 165                  | 98   | -14      | 90   | -11      | 118  | 9        | 109  | 0        | 103 ± 12.2           | -4 ± 10.8            | 4 |
| 180                  | 104  | -8       | 102  | 1        | 114  | 6        | 109  | 0        | 107 ± 5.4            | 0 ± 5.6              | 4 |
| 195                  | 112  | 0        | 101  | 0        | 113  | 4        | 107  | -2       | 108 ± 5.2            | 1 ± 2.5              | 4 |
| 210                  | 122  | 10       | 106  | 4        | 109  | 0        | 116  | 7        | 113 ± 7.2            | 5 ± 4.2              | 4 |
| 225                  | 109  | -3       | 99   | -2       | 107  | -2       | 111  | 3        | 106 ± 5.1            | -1 ± 2.5             | 4 |
| 240                  | 128  | 16       | 99   | -2       | 119  | 10       | 120  | 11       | 116 ± 12.3           | 9 ± 7.8              | 4 |
| 270                  | 112  | 0        | 101  | -1       | 125  | 16       | 111  | 3        | 112 ± 9.9            | 5 ± 8.0              | 4 |
| 300                  | 106  | -6       | 100  | -2       | 112  | 3        | 125  | 17       | 111 ± 10.8           | 3 ± 9.7              | 4 |
| 330                  | 106  | -6       | 100  | -1       | 104  | -5       | 110  | 1        | 105 ± 4.1            | -3 ± 3.1             | 4 |
| 360                  | 103  | -9       | 90   | -11      | 116  | 7        | 102  | -6       | 103 ± 10.3           | -5 ± 8.2             | 4 |
| 390                  | 104  | -8       | 86   | -16      | 100  | -9       | 109  | 0        | 100 ± 9.9            | -8 ± 6.5             | 4 |
| 420                  | 103  | -9       | 86   | -15      | 108  | 0        | 108  | -1       | 101 ± 10.2           | -6 ± 7.0             | 4 |

-- Data not available (See Section 6.3.2.1. Deviations from Protocol)

CONFIDENTIAL

Appendix 1.1 – Group 1, Vehicle PO

Heart rate (beats/min)

| Time from dose (min) | 2482 |          | 2539 |          | 2552 |          | 2057 |          | Absolute Mean ± S.D. | Δ from 0 Mean ± S.D. | N |
|----------------------|------|----------|------|----------|------|----------|------|----------|----------------------|----------------------|---|
|                      | Abs. | Δ from 0 | Abs. | Δ from 0 | Abs. | Δ from 0 | Abs. | Δ from 0 |                      |                      |   |
| -60                  | 61   | -2       | 60   | -22      | 102  | -2       | 67   | -13      | 73 ± 19.8            | -10 ± 9.7            | 4 |
| -50                  | 63   | 0        | 105  | 23       | 113  | 9        | 68   | -12      | 87 ± 25.3            | 5 ± 14.5             | 4 |
| -40                  | 48   | -14      | 61   | -21      | 95   | -9       | 82   | 2        | 72 ± 20.8            | -10 ± 9.8            | 4 |
| -30                  | 81   | 19       | 111  | 29       | 114  | 10       | 89   | 9        | 99 ± 16.2            | 16 ± 9.2             | 4 |
| -20                  | 64   | 2        | 79   | -3       | 99   | -5       | 109  | 29       | 88 ± 20.3            | 6 ± 16.1             | 4 |
| -10                  | 58   | -5       | 77   | -5       | 102  | -2       | 64   | -16      | 75 ± 19.5            | -7 ± 6.2             | 4 |
| 0                    | 63   | 0        | 82   | 0        | 104  | 0        | 80   | 0        | 82 ± 17.0            | 0 ± 0.0              | 4 |
| 15                   | 82   | 20       | 104  | 22       | 92   | -12      | 100  | 20       | 94 ± 9.6             | 12 ± 16.5            | 4 |
| 30                   | 62   | -1       | 83   | 1        | 106  | 2        | 63   | -17      | 78 ± 20.5            | -4 ± 8.6             | 4 |
| 45                   | 58   | -5       | 84   | 2        | 109  | 5        | 90   | 10       | 85 ± 21.0            | 3 ± 6.1              | 4 |
| 60                   | -    | -        | 149  | 67       | 95   | -9       | 135  | 55       | 126 ± 28.2           | 37 ± 41.0            | 3 |
| 75                   | 89   | 26       | 134  | 52       | 101  | -3       | 85   | 5        | 102 ± 22.2           | 20 ± 24.5            | 4 |
| 90                   | 68   | 6        | 103  | 21       | 111  | 7        | 79   | -1       | 90 ± 20.3            | 8 ± 9.4              | 4 |
| 105                  | 76   | 14       | 82   | -1       | 103  | -1       | 68   | -12      | 82 ± 14.9            | 0 ± 10.6             | 4 |
| 120                  | 59   | -4       | 85   | 3        | 103  | -1       | 76   | -4       | 81 ± 18.4            | -1 ± 3.2             | 4 |
| 135                  | 59   | -3       | 77   | -5       | 106  | 2        | 87   | 7        | 82 ± 19.4            | 0 ± 5.2              | 4 |
| 150                  | 64   | 2        | 85   | 3        | 102  | -2       | 86   | 6        | 84 ± 15.7            | 2 ± 3.0              | 4 |
| 165                  | 62   | 0        | 86   | 4        | 122  | 18       | 96   | 16       | 92 ± 24.7            | 9 ± 8.9              | 4 |
| 180                  | 67   | 5        | 90   | 8        | 116  | 12       | 81   | 1        | 89 ± 20.3            | 6 ± 4.4              | 4 |
| 195                  | 63   | 1        | 85   | 2        | 184  | 80       | 73   | -7       | 101 ± 55.6           | 19 ± 40.6            | 4 |
| 210                  | 92   | 29       | 119  | 37       | 104  | 0        | 89   | 9        | 101 ± 13.6           | 19 ± 17.2            | 4 |
| 225                  | 65   | 3        | 84   | 2        | 87   | -17      | 81   | 1        | 79 ± 9.7             | -3 ± 9.3             | 4 |
| 240                  | 96   | 33       | 86   | 4        | 105  | 1        | 87   | 7        | 94 ± 8.9             | 11 ± 14.7            | 4 |
| 270                  | 68   | 5        | 76   | -6       | 125  | 21       | 74   | -6       | 86 ± 26.4            | 4 ± 12.7             | 4 |
| 300                  | 79   | 17       | 68   | -14      | 94   | -10      | 80   | 0        | 80 ± 10.7            | -2 ± 13.7            | 4 |
| 330                  | 72   | 9        | 79   | -3       | 86   | -18      | 94   | 14       | 83 ± 9.5             | 0 ± 14.2             | 4 |
| 360                  | 78   | 15       | 92   | 10       | 137  | 33       | 100  | 20       | 102 ± 25.5           | 20 ± 10.0            | 4 |
| 390                  | 78   | 16       | 94   | 12       | 127  | 23       | 106  | 26       | 101 ± 20.6           | 19 ± 6.4             | 4 |
| 420                  | 79   | 16       | 81   | -1       | 110  | 6        | 90   | 10       | 90 ± 14.4            | 8 ± 7.0              | 4 |

-- Data not available (See Section 6.3.2.1. Deviations from Protocol)

CONFIDENTIAL

Appendix 1.1 – Group 1, Vehicle PO

Uncorrected QT interval (msec)

| Time from dose (min) | 2482 |          | 2539 |          | 2552 |          | 2057 |          | Absolute Mean ± S.D. | Δ from 0 Mean ± S.D. | N |
|----------------------|------|----------|------|----------|------|----------|------|----------|----------------------|----------------------|---|
|                      | Abs. | Δ from 0 | Abs. | Δ from 0 | Abs. | Δ from 0 | Abs. | Δ from 0 |                      |                      |   |
| -60                  | 227  | 4        | 205  | 6        | 194  | -1       | 196  | 1        | 206 ± 14.7           | 2 ± 3.0              | 4 |
| -50                  | 231  | 8        | 208  | 8        | 192  | -4       | 203  | 8        | 209 ± 16.5           | 5 ± 5.9              | 4 |
| -40                  | 233  | 10       | 212  | 13       | 198  | 2        | 195  | 0        | 209 ± 17.4           | 6 ± 6.3              | 4 |
| -30                  | 195  | -28      | 172  | -28      | 191  | -4       | 183  | -12      | 185 ± 10.2           | -18 ± 11.7           | 4 |
| -20                  | 226  | 3        | 203  | 3        | 197  | 2        | 192  | -3       | 205 ± 14.9           | 1 ± 3.0              | 4 |
| -10                  | 226  | 3        | 197  | -3       | 201  | 5        | 202  | 7        | 206 ± 13.2           | 3 ± 4.2              | 4 |
| 0                    | 223  | 0        | 200  | 0        | 195  | 0        | 195  | 0        | 203 ± 13.2           | 0 ± 0.0              | 4 |
| 15                   | 197  | -26      | 174  | -26      | 198  | 3        | 189  | -7       | 189 ± 11.3           | -14 ± 14.4           | 4 |
| 30                   | 222  | -1       | 197  | -2       | 197  | 2        | 229  | 34       | 211 ± 16.6           | 8 ± 17.3             | 4 |
| 45                   | 226  | 3        | 202  | 3        | 193  | -2       | 191  | -4       | 203 ± 15.8           | 0 ± 3.5              | 4 |
| 60                   | -    | -        | 144  | -55      | 188  | -7       | 159  | -36      | 164 ± 22.3           | -33 ± 24.1           | 3 |
| 75                   | 191  | -32      | 158  | -41      | 187  | -9       | 187  | -8       | 181 ± 15.0           | -22 ± 16.5           | 4 |
| 90                   | 211  | -11      | 194  | -6       | 185  | -10      | 201  | 6        | 198 ± 11.3           | -5 ± 8.0             | 4 |
| 105                  | 209  | -14      | 204  | 4        | 192  | -3       | 205  | 9        | 202 ± 7.3            | -1 ± 10.2            | 4 |
| 120                  | 221  | -2       | 200  | 0        | 193  | -2       | 220  | 24       | 208 ± 14.0           | 5 ± 12.8             | 4 |
| 135                  | 222  | -1       | 201  | 2        | 192  | -4       | 198  | 2        | 203 ± 13.1           | 0 ± 2.8              | 4 |
| 150                  | 220  | -3       | 198  | -2       | 184  | -11      | 220  | 24       | 206 ± 17.5           | 2 ± 15.3             | 4 |
| 165                  | 227  | 4        | 201  | 1        | 173  | -22      | 206  | 10       | 202 ± 22.0           | -2 ± 14.1            | 4 |
| 180                  | 231  | 8        | 205  | 5        | 189  | -7       | 226  | 30       | 213 ± 19.4           | 9 ± 15.3             | 4 |
| 195                  | 222  | -1       | 182  | -18      | 187  | -9       | 193  | -2       | 196 ± 18.1           | -7 ± 7.8             | 4 |
| 210                  | 211  | -12      | 194  | -6       | 182  | -13      | 176  | -19      | 191 ± 15.2           | -13 ± 5.6            | 4 |
| 225                  | 217  | -6       | 206  | 6        | 189  | -7       | 192  | -4       | 201 ± 13.2           | -3 ± 6.0             | 4 |
| 240                  | 194  | -29      | 193  | -7       | 188  | -7       | 184  | -11      | 190 ± 4.6            | -14 ± 10.4           | 4 |
| 270                  | 222  | -1       | 204  | 4        | 185  | -11      | 195  | 0        | 201 ± 15.7           | -2 ± 6.2             | 4 |
| 300                  | 215  | -8       | 204  | 4        | 199  | 4        | 215  | 19       | 208 ± 7.8            | 5 ± 11.2             | 4 |
| 330                  | 221  | -2       | 206  | 7        | 206  | 11       | 217  | 22       | 213 ± 7.7            | 10 ± 9.8             | 4 |
| 360                  | 232  | 9        | 195  | -4       | 189  | -6       | 231  | 35       | 212 ± 22.8           | 8 ± 19.2             | 4 |
| 390                  | 234  | 11       | 202  | 2        | 177  | -18      | 221  | 26       | 209 ± 24.9           | 5 ± 18.5             | 4 |
| 420                  | 232  | 9        | 218  | 19       | 196  | 0        | 222  | 26       | 217 ± 15.3           | 14 ± 11.4            | 4 |

-- Data not available (See Section 6.3.2.1. Deviations from Protocol)

CONFIDENTIAL

Appendix 1.1 – Group 1, Vehicle PO

Corrected QT interval (covariate analysis, QTca) (msec)

| Time from dose (min) | 2482 |          | 2539 |          | 2552 |          | 2057 |          | Absolute Mean ± S.D. | Δ from 0 Mean ± S.D. | N |
|----------------------|------|----------|------|----------|------|----------|------|----------|----------------------|----------------------|---|
|                      | Abs. | Δ from 0 | Abs. | Δ from 0 | Abs. | Δ from 0 | Abs. | Δ from 0 |                      |                      |   |
| -60                  | 200  | 3        | 180  | -7       | 195  | -1       | 178  | -3       | 188 ± 10.9           | -2 ± 4.0             | 4 |
| -50                  | 207  | 9        | 210  | 23       | 195  | -1       | 182  | 1        | 198 ± 12.6           | 8 ± 11.0             | 4 |
| -40                  | 194  | -4       | 188  | 1        | 194  | -2       | 178  | -3       | 189 ± 7.4            | -2 ± 1.9             | 4 |
| -30                  | 185  | -13      | 174  | -12      | 196  | 0        | 175  | -6       | 182 ± 10.4           | -8 ± 6.2             | 4 |
| -20                  | 201  | 4        | 187  | 0        | 197  | 1        | 193  | 12       | 195 ± 5.9            | 4 ± 5.6              | 4 |
| -10                  | 198  | 1        | 182  | -5       | 199  | 3        | 180  | -1       | 190 ± 10.6           | -1 ± 3.5             | 4 |
| 0                    | 197  | 0        | 187  | 0        | 196  | 0        | 181  | 0        | 190 ± 7.8            | 0 ± 0.0              | 4 |
| 15                   | 188  | -10      | 174  | -13      | 193  | -3       | 183  | 2        | 184 ± 8.4            | -6 ± 6.6             | 4 |
| 30                   | 196  | -2       | 183  | -4       | 198  | 2        | 200  | 19       | 194 ± 7.8            | 4 ± 10.5             | 4 |
| 45                   | 195  | -2       | 189  | 2        | 194  | -2       | 181  | 0        | 190 ± 6.6            | -1 ± 1.9             | 4 |
| 60                   | -    | -        | 157  | -30      | 182  | -14      | 169  | -12      | 169 ± 12.8           | -19 ± 9.9            | 3 |
| 75                   | 183  | -14      | 169  | -17      | 186  | -10      | 179  | -2       | 180 ± 7.4            | -11 ± 6.4            | 4 |
| 90                   | 193  | -5       | 194  | 8        | 188  | -8       | 189  | 8        | 191 ± 2.9            | 1 ± 8.3              | 4 |
| 105                  | 192  | -6       | 198  | 12       | 190  | -6       | 186  | 5        | 192 ± 5.0            | 1 ± 8.6              | 4 |
| 120                  | 196  | -2       | 189  | 2        | 192  | -4       | 202  | 21       | 195 ± 5.7            | 4 ± 11.3             | 4 |
| 135                  | 193  | -5       | 186  | -1       | 193  | -3       | 186  | 5        | 189 ± 4.2            | -1 ± 4.0             | 4 |
| 150                  | 197  | 0        | 188  | 2        | 184  | -12      | 208  | 27       | 194 ± 10.8           | 4 ± 16.6             | 4 |
| 165                  | 201  | 3        | 190  | 4        | 181  | -15      | 198  | 17       | 193 ± 8.9            | 2 ± 13.3             | 4 |
| 180                  | 209  | 12       | 195  | 9        | 189  | -7       | 211  | 30       | 201 ± 10.8           | 11 ± 15.3            | 4 |
| 195                  | 200  | 3        | 175  | -12      | 185  | -11      | 178  | -3       | 184 ± 11.5           | -6 ± 7.2             | 4 |
| 210                  | 205  | 7        | 200  | 13       | 184  | -12      | 167  | -14      | 189 ± 16.9           | -1 ± 13.6            | 4 |
| 225                  | 196  | -2       | 190  | 4        | 182  | -14      | 184  | 3        | 188 ± 6.2            | -2 ± 8.4             | 4 |
| 240                  | 190  | -7       | 181  | -6       | 187  | -9       | 174  | -7       | 183 ± 7.3            | -7 ± 1.2             | 4 |
| 270                  | 201  | 4        | 183  | -3       | 195  | -1       | 182  | 1        | 190 ± 9.3            | 0 ± 3.2              | 4 |
| 300                  | 203  | 6        | 187  | 1        | 196  | 0        | 200  | 19       | 197 ± 7.0            | 6 ± 8.9              | 4 |
| 330                  | 204  | 6        | 194  | 7        | 198  | 2        | 210  | 29       | 201 ± 6.7            | 11 ± 12.0            | 4 |
| 360                  | 217  | 20       | 188  | 2        | 201  | 5        | 224  | 43       | 208 ± 15.9           | 17 ± 18.6            | 4 |
| 390                  | 215  | 18       | 193  | 6        | 186  | -10      | 219  | 38       | 203 ± 16.1           | 13 ± 20.0            | 4 |
| 420                  | 214  | 17       | 209  | 23       | 200  | 4        | 213  | 32       | 209 ± 6.5            | 19 ± 11.7            | 4 |

“-“ Data not available (See Section 6.3.2.1. Deviations from Protocol)

CONFIDENTIAL

Appendix 1.1 – Group 1, Vehicle PO

PR interval (msec)

| Time from dose (min) | 2482 |          | 2539 |          | 2552 |          | 2057 |          | Absolute Mean ± S.D. | Δ from 0 Mean ± S.D. | N |
|----------------------|------|----------|------|----------|------|----------|------|----------|----------------------|----------------------|---|
|                      | Abs. | Δ from 0 | Abs. | Δ from 0 | Abs. | Δ from 0 | Abs. | Δ from 0 |                      |                      |   |
| -60                  | 115  | 3        | 111  | 6        | 91   | -2       | 92   | 1        | 102 ± 12.4           | 2 ± 3.4              | 4 |
| -50                  | 113  | 1        | 100  | -5       | 94   | 1        | 95   | 4        | 100 ± 8.6            | 0 ± 3.8              | 4 |
| -40                  | 112  | 1        | 110  | 5        | 98   | 5        | 90   | -1       | 103 ± 10.1           | 2 ± 3.0              | 4 |
| -30                  | 107  | -4       | 97   | -8       | 90   | -3       | 87   | -4       | 95 ± 9.1             | -5 ± 2.4             | 4 |
| -20                  | 111  | -1       | 101  | -4       | 93   | 0        | 88   | -3       | 98 ± 10.0            | -2 ± 2.0             | 4 |
| -10                  | 111  | -1       | 111  | 6        | 92   | -1       | 94   | 3        | 102 ± 10.5           | 2 ± 3.6              | 4 |
| 0                    | 111  | 0        | 105  | 0        | 93   | 0        | 91   | 0        | 100 ± 9.7            | 0 ± 0.0              | 4 |
| 15                   | 101  | -10      | 99   | -6       | 92   | -1       | 86   | -5       | 94 ± 6.9             | -6 ± 3.8             | 4 |
| 30                   | 110  | -1       | 102  | -3       | 93   | 0        | 95   | 4        | 100 ± 7.8            | 0 ± 3.1              | 4 |
| 45                   | 112  | 0        | 105  | 0        | 90   | -3       | 90   | -1       | 99 ± 11.0            | -1 ± 1.7             | 4 |
| 60                   | -    | -        | 87   | -18      | 95   | 2        | 86   | -5       | 89 ± 5.0             | -7 ± 9.8             | 3 |
| 75                   | 101  | -10      | 93   | -12      | 90   | -3       | 92   | 1        | 94 ± 4.7             | -6 ± 6.2             | 4 |
| 90                   | 107  | -4       | 102  | -3       | 93   | 0        | 96   | 5        | 99 ± 6.3             | -1 ± 4.1             | 4 |
| 105                  | 106  | -6       | 112  | 7        | 99   | 6        | 97   | 6        | 103 ± 6.7            | 3 ± 5.9              | 4 |
| 120                  | 105  | -6       | 109  | 4        | 100  | 7        | 99   | 8        | 103 ± 4.4            | 3 ± 6.4              | 4 |
| 135                  | 107  | -4       | 110  | 5        | 100  | 7        | 94   | 3        | 103 ± 7.1            | 3 ± 5.0              | 4 |
| 150                  | 107  | -5       | 106  | 1        | 93   | 0        | 100  | 9        | 101 ± 6.2            | 1 ± 5.6              | 4 |
| 165                  | 107  | -4       | 114  | 9        | 90   | -3       | 92   | 1        | 101 ± 11.7           | 0 ± 5.9              | 4 |
| 180                  | 108  | -4       | 109  | 4        | 95   | 2        | 97   | 6        | 102 ± 7.2            | 2 ± 4.1              | 4 |
| 195                  | 106  | -6       | 103  | -2       | 93   | 0        | 97   | 6        | 99 ± 5.8             | -1 ± 5.0             | 4 |
| 210                  | 104  | -8       | 102  | -3       | 89   | -4       | 88   | -3       | 96 ± 8.4             | -4 ± 2.3             | 4 |
| 225                  | 111  | 0        | 102  | -3       | 87   | -6       | 91   | 0        | 98 ± 10.9            | -2 ± 2.9             | 4 |
| 240                  | 93   | -19      | 99   | -6       | 94   | 1        | 87   | -3       | 93 ± 4.7             | -7 ± 8.4             | 4 |
| 270                  | 110  | -1       | 116  | 11       | 91   | -2       | 94   | 3        | 103 ± 12.2           | 3 ± 6.1              | 4 |
| 300                  | 114  | 3        | 107  | 2        | 90   | -3       | 100  | 9        | 103 ± 10.2           | 3 ± 5.0              | 4 |
| 330                  | 108  | -3       | 113  | 8        | 93   | 0        | 97   | 6        | 103 ± 9.4            | 2 ± 5.0              | 4 |
| 360                  | 102  | -9       | 105  | 0        | 90   | -3       | 90   | -1       | 97 ± 7.8             | -3 ± 4.1             | 4 |
| 390                  | 105  | -6       | 109  | 4        | 80   | -13      | 83   | -8       | 94 ± 14.5            | -6 ± 6.8             | 4 |
| 420                  | 102  | -9       | 94   | -11      | 97   | 4        | 92   | 1        | 96 ± 4.4             | -4 ± 7.3             | 4 |

“-“ Data not available (See Section 6.3.2.1. Deviations from Protocol)

CONFIDENTIAL

Appendix 1.1 – Group 1, Vehicle PO

QRS interval (msec)

| Time from dose (min) | 2482 |          | 2539 |          | 2552 |          | 2057 |          | Absolute Mean ± S.D. | Δ from 0 Mean ± S.D. | N |
|----------------------|------|----------|------|----------|------|----------|------|----------|----------------------|----------------------|---|
|                      | Abs. | Δ from 0 | Abs. | Δ from 0 | Abs. | Δ from 0 | Abs. | Δ from 0 |                      |                      |   |
| -60                  | 39   | -1       | 53   | 7        | 37   | -2       | 40   | -1       | 42 ± 7.2             | 1 ± 4.0              | 4 |
| -50                  | 39   | 0        | 45   | -1       | 38   | 0        | 40   | -1       | 41 ± 2.9             | -1 ± 0.3             | 4 |
| -40                  | 41   | 1        | 50   | 4        | 38   | 0        | 41   | 0        | 42 ± 4.9             | 1 ± 1.8              | 4 |
| -30                  | 40   | 0        | 42   | -4       | 39   | 0        | 43   | 2        | 41 ± 1.8             | 0 ± 2.4              | 4 |
| -20                  | 39   | 0        | 40   | -6       | 39   | 0        | 41   | 0        | 40 ± 0.9             | -1 ± 2.9             | 4 |
| -10                  | 40   | 0        | 46   | 0        | 41   | 2        | 40   | -1       | 42 ± 2.8             | 0 ± 1.1              | 4 |
| 0                    | 40   | 0        | 46   | 0        | 39   | 0        | 41   | 0        | 41 ± 3.2             | 0 ± 0.0              | 4 |
| 15                   | 38   | -1       | 46   | 0        | 37   | -2       | 41   | 0        | 41 ± 3.8             | -1 ± 0.9             | 4 |
| 30                   | 40   | 0        | 52   | 6        | 39   | 1        | 41   | 0        | 43 ± 5.8             | 2 ± 2.7              | 4 |
| 45                   | 41   | 1        | 53   | 8        | 38   | -1       | 38   | -2       | 43 ± 7.3             | 1 ± 4.4              | 4 |
| 60                   | -    | -        | 49   | 3        | 38   | -1       | 37   | -4       | 41 ± 6.9             | -1 ± 3.8             | 3 |
| 75                   | 39   | -1       | 47   | 1        | 37   | -2       | 38   | -3       | 40 ± 4.6             | -1 ± 1.7             | 4 |
| 90                   | 40   | 0        | 51   | 5        | 38   | -1       | 39   | -2       | 42 ± 5.9             | 1 ± 2.9              | 4 |
| 105                  | 39   | -1       | 51   | 5        | 37   | -1       | 39   | -2       | 42 ± 6.4             | 0 ± 3.3              | 4 |
| 120                  | 39   | -1       | 52   | 6        | 37   | -2       | 41   | 1        | 42 ± 6.7             | 1 ± 3.5              | 4 |
| 135                  | 39   | -1       | 53   | 7        | 38   | -1       | 40   | -1       | 43 ± 7.2             | 1 ± 4.1              | 4 |
| 150                  | 41   | 2        | 38   | -8       | 37   | -1       | 41   | 0        | 39 ± 2.1             | -2 ± 4.2             | 4 |
| 165                  | 41   | 2        | 43   | -3       | 34   | -4       | 41   | 0        | 40 ± 3.7             | -1 ± 2.7             | 4 |
| 180                  | 40   | 0        | 53   | 7        | 40   | 1        | 41   | 0        | 43 ± 6.3             | 2 ± 3.3              | 4 |
| 195                  | 40   | 0        | 48   | 2        | 37   | -2       | 41   | 0        | 42 ± 4.8             | 0 ± 1.7              | 4 |
| 210                  | 39   | -1       | 51   | 6        | 35   | -4       | 39   | -2       | 41 ± 7.2             | 0 ± 4.1              | 4 |
| 225                  | 40   | 0        | 54   | 9        | 35   | -4       | 41   | 0        | 43 ± 8.2             | 1 ± 5.1              | 4 |
| 240                  | 37   | -2       | 52   | 6        | 39   | 0        | 41   | 0        | 42 ± 6.8             | 1 ± 3.7              | 4 |
| 270                  | 40   | 0        | 44   | -1       | 37   | -1       | 40   | -1       | 41 ± 2.9             | -1 ± 0.7             | 4 |
| 300                  | 40   | 1        | 43   | -3       | 36   | -2       | 40   | -1       | 40 ± 2.6             | -1 ± 1.6             | 4 |
| 330                  | 40   | 0        | 40   | -6       | 36   | -3       | 42   | 1        | 40 ± 2.5             | -2 ± 3.1             | 4 |
| 360                  | 60   | 20       | 43   | -2       | 36   | -3       | 44   | 3        | 46 ± 10.1            | 5 ± 10.9             | 4 |
| 390                  | 58   | 18       | 40   | -6       | 35   | -4       | 43   | 2        | 44 ± 10.0            | 3 ± 11.1             | 4 |
| 420                  | 60   | 20       | 39   | -7       | 37   | -2       | 43   | 2        | 44 ± 10.5            | 3 ± 11.8             | 4 |

“-“ Data not available (See Section 6.3.2.1. Deviations from Protocol)

CONFIDENTIAL

Appendix 1.1 – Group 1, Vehicle PO

RR interval (msec)

| Time from dose (min) | 2482 |          | 2539 |          | 2552 |          | 2057 |          | Absolute Mean ± S.D. | Δ from 0 Mean ± S.D. | N |
|----------------------|------|----------|------|----------|------|----------|------|----------|----------------------|----------------------|---|
|                      | Abs. | Δ from 0 | Abs. | Δ from 0 | Abs. | Δ from 0 | Abs. | Δ from 0 |                      |                      |   |
| -60                  | 1030 | 3        | 1072 | 246      | 596  | 3        | 917  | 65       | 904 ± 215.5          | 79 ± 115.2           | 4 |
| -50                  | 982  | -45      | 579  | -247     | 560  | -34      | 978  | 125      | 774 ± 237.2          | -50 ± 152.6          | 4 |
| -40                  | 1336 | 309      | 1030 | 204      | 646  | 53       | 883  | 31       | 974 ± 288.5          | 149 ± 131.2          | 4 |
| -30                  | 760  | -267     | 566  | -260     | 534  | -59      | 733  | -119     | 648 ± 114.8          | -176 ± 103.7         | 4 |
| -20                  | 999  | -28      | 856  | 31       | 606  | 13       | 589  | -263     | 763 ± 199.4          | -62 ± 136.3          | 4 |
| -10                  | 1056 | 29       | 851  | 25       | 617  | 23       | 1012 | 160      | 884 ± 198.8          | 59 ± 67.0            | 4 |
| 0                    | 1027 | 0        | 826  | 0        | 593  | 0        | 852  | 0        | 825 ± 178.3          | 0 ± 0.0              | 4 |
| 15                   | 738  | -289     | 599  | -226     | 668  | 75       | 694  | -158     | 675 ± 58.1           | -150 ± 158.9         | 4 |
| 30                   | 1034 | 7        | 838  | 13       | 588  | -5       | 1082 | 230      | 886 ± 224.7          | 61 ± 112.6           | 4 |
| 45                   | 1132 | 105      | 814  | -12      | 582  | -11      | 767  | -85      | 824 ± 228.5          | -1 ± 78.3            | 4 |
| 60                   | -    | -        | 419  | -407     | 689  | 95       | 462  | -390     | 523 ± 144.8          | -234 ± 285.2         | 3 |
| 75                   | 717  | -310     | 448  | -378     | 601  | 8        | 733  | -119     | 625 ± 131.8          | -200 ± 176.7         | 4 |
| 90                   | 901  | -126     | 592  | -233     | 557  | -36      | 792  | -60      | 711 ± 163.9          | -114 ± 88.3          | 4 |
| 105                  | 875  | -152     | 676  | -149     | 623  | 30       | 907  | 55       | 770 ± 141.9          | -54 ± 112.0          | 4 |
| 120                  | 1019 | -8       | 771  | -55      | 615  | 22       | 866  | 14       | 818 ± 169.3          | -7 ± 34.6            | 4 |
| 135                  | 1106 | 79       | 854  | 28       | 583  | -10      | 792  | -60      | 834 ± 215.5          | 9 ± 58.8             | 4 |
| 150                  | 968  | -60      | 749  | -77      | 612  | 19       | 762  | -90      | 773 ± 146.7          | -52 ± 48.7           | 4 |
| 165                  | 1027 | 0        | 754  | -72      | 500  | -93      | 707  | -145     | 747 ± 216.8          | -78 ± 60.2           | 4 |
| 180                  | 919  | -108     | 741  | -85      | 601  | 8        | 804  | -48      | 766 ± 132.4          | -58 ± 50.7           | 4 |
| 195                  | 941  | -87      | 713  | -112     | 633  | 40       | 864  | 12       | 788 ± 139.7          | -37 ± 74.0           | 4 |
| 210                  | 683  | -345     | 527  | -299     | 577  | -16      | 755  | -97      | 635 ± 103.0          | -189 ± 157.8         | 4 |
| 225                  | 946  | -81      | 844  | 18       | 703  | 110      | 709  | -143     | 800 ± 116.7          | -24 ± 111.3          | 4 |
| 240                  | 649  | -378     | 797  | -28      | 612  | 19       | 765  | -87      | 706 ± 89.1           | -119 ± 178.5         | 4 |
| 270                  | 916  | -111     | 951  | 125      | 479  | -114     | 810  | -42      | 789 ± 215.2          | -35 ± 112.2          | 4 |
| 300                  | 767  | -260     | 873  | 47       | 648  | 54       | 818  | -34      | 776 ± 96.2           | -48 ± 146.9          | 4 |
| 330                  | 867  | -161     | 782  | -44      | 717  | 124      | 703  | -149     | 767 ± 74.4           | -57 ± 131.9          | 4 |
| 360                  | 804  | -224     | 697  | -129     | 459  | -134     | 686  | -166     | 661 ± 145.1          | -163 ± 43.4          | 4 |
| 390                  | 871  | -156     | 730  | -95      | 482  | -111     | 629  | -223     | 678 ± 164.0          | -146 ± 57.1          | 4 |
| 420                  | 844  | -183     | 721  | -104     | 544  | -49      | 712  | -140     | 706 ± 123.1          | -119 ± 56.8          | 4 |

“-“ Data not available (See Section 6.3.2.1. Deviations from Protocol)



CONFIDENTIAL

Appendix 1.1 – Group 1, Vehicle PO

Body temperature (°C)

| Time from dose (min) | 2482 |          | 2539 |          | 2552 |          | 2057 |          | Absolute Mean ± S.D. | Δ from 0 Mean ± S.D. | N |
|----------------------|------|----------|------|----------|------|----------|------|----------|----------------------|----------------------|---|
|                      | Abs. | Δ from 0 | Abs. | Δ from 0 | Abs. | Δ from 0 | Abs. | Δ from 0 |                      |                      |   |
| -60                  | 38.0 | 0.1      | 37.6 | -0.1     | 38.8 | 0.0      | 37.9 | 0.1      | 38.1 ± 0.52          | 0.1 ± 0.1            | 4 |
| -50                  | 38.0 | 0.2      | 37.4 | -0.2     | 38.8 | 0.0      | 37.8 | 0.1      | 38.0 ± 0.58          | 0.0 ± 0.2            | 4 |
| -40                  | 37.8 | 0.0      | 37.5 | -0.2     | 38.8 | 0.0      | 37.8 | 0.0      | 38.0 ± 0.56          | 0.0 ± 0.1            | 4 |
| -30                  | 37.7 | -0.2     | 37.5 | -0.2     | 38.8 | 0.0      | 37.7 | -0.1     | 37.9 ± 0.58          | -0.1 ± 0.1           | 4 |
| -20                  | 37.7 | -0.1     | 37.9 | 0.2      | 38.8 | 0.0      | 37.7 | 0.0      | 38.0 ± 0.52          | 0.0 ± 0.1            | 4 |
| -10                  | 37.8 | -0.1     | 38.1 | 0.4      | 38.9 | 0.0      | 37.8 | 0.0      | 38.1 ± 0.52          | 0.1 ± 0.2            | 4 |
| 0                    | 37.8 | 0.0      | 37.7 | 0.0      | 38.8 | 0.0      | 37.8 | 0.0      | 38.0 ± 0.53          | 0.0 ± 0.0            | 4 |
| 15                   | 38.1 | 0.3      | 38.4 | 0.7      | 38.9 | 0.0      | 37.8 | 0.0      | 38.3 ± 0.46          | 0.3 ± 0.3            | 4 |
| 30                   | 38.2 | 0.4      | 38.5 | 0.8      | 38.8 | 0.0      | 37.8 | 0.0      | 38.3 ± 0.43          | 0.3 ± 0.4            | 4 |
| 45                   | 38.2 | 0.4      | 38.2 | 0.5      | 38.8 | 0.0      | 37.8 | 0.0      | 38.3 ± 0.40          | 0.2 ± 0.3            | 4 |
| 60                   | -    | -        | 39.0 | 1.4      | 38.7 | -0.1     | 38.2 | 0.4      | 38.7 ± 0.41          | 0.6 ± 0.7            | 3 |
| 75                   | 39.3 | 1.4      | 39.1 | 1.4      | 38.7 | -0.1     | 38.2 | 0.4      | 38.8 ± 0.46          | 0.8 ± 0.8            | 4 |
| 90                   | 39.1 | 1.2      | 38.7 | 1.0      | 38.7 | -0.1     | 38.1 | 0.3      | 38.7 ± 0.39          | 0.6 ± 0.6            | 4 |
| 105                  | 38.9 | 1.1      | 38.5 | 0.8      | 38.8 | 0.0      | 37.9 | 0.1      | 38.5 ± 0.46          | 0.5 ± 0.5            | 4 |
| 120                  | 38.6 | 0.7      | 38.4 | 0.7      | 38.8 | 0.0      | 37.6 | -0.2     | 38.3 ± 0.53          | 0.3 ± 0.5            | 4 |
| 135                  | 38.2 | 0.4      | 38.1 | 0.4      | 38.8 | 0.0      | 37.3 | -0.5     | 38.1 ± 0.62          | 0.1 ± 0.4            | 4 |
| 150                  | 38.0 | 0.2      | 38.1 | 0.4      | 38.9 | 0.0      | 37.3 | -0.5     | 38.1 ± 0.63          | 0.0 ± 0.4            | 4 |
| 165                  | 38.1 | 0.2      | 38.0 | 0.3      | 39.0 | 0.2      | 37.5 | -0.3     | 38.1 ± 0.62          | 0.1 ± 0.3            | 4 |
| 180                  | 37.8 | 0.0      | 37.9 | 0.3      | 39.2 | 0.3      | 37.4 | -0.4     | 38.1 ± 0.77          | 0.0 ± 0.3            | 4 |
| 195                  | 37.8 | 0.0      | 38.0 | 0.3      | 39.1 | 0.3      | 37.5 | -0.3     | 38.1 ± 0.72          | 0.1 ± 0.3            | 4 |
| 210                  | 37.9 | 0.1      | 37.9 | 0.2      | 39.1 | 0.3      | 37.5 | -0.2     | 38.1 ± 0.69          | 0.1 ± 0.2            | 4 |
| 225                  | 38.0 | 0.2      | 38.0 | 0.3      | 39.1 | 0.3      | 37.9 | 0.1      | 38.3 ± 0.58          | 0.2 ± 0.1            | 4 |
| 240                  | 38.1 | 0.3      | 38.1 | 0.4      | 39.2 | 0.3      | 38.0 | 0.2      | 38.3 ± 0.55          | 0.3 ± 0.1            | 4 |
| 270                  | 38.3 | 0.4      | 38.1 | 0.4      | 39.0 | 0.2      | 37.8 | 0.0      | 38.3 ± 0.52          | 0.3 ± 0.2            | 4 |
| 300                  | 38.2 | 0.3      | 38.4 | 0.7      | 39.0 | 0.2      | 37.9 | 0.1      | 38.4 ± 0.47          | 0.3 ± 0.2            | 4 |
| 330                  | 38.2 | 0.4      | 38.4 | 0.7      | 39.2 | 0.4      | 37.9 | 0.1      | 38.4 ± 0.58          | 0.4 ± 0.3            | 4 |
| 360                  | 37.9 | 0.1      | 38.1 | 0.4      | 38.8 | 0.0      | 37.5 | -0.3     | 38.1 ± 0.56          | 0.0 ± 0.3            | 4 |
| 390                  | 37.9 | 0.0      | 38.0 | 0.4      | 38.7 | -0.2     | 37.7 | -0.1     | 38.1 ± 0.43          | 0.0 ± 0.2            | 4 |
| 420                  | 38.2 | 0.4      | 38.2 | 0.5      | 39.1 | 0.3      | 38.4 | 0.6      | 38.5 ± 0.42          | 0.4 ± 0.1            | 4 |

“-“ Data not available (See Section 6.3.2.1. Deviations from Protocol)

CONFIDENTIAL

Appendix 1.2 – Group 2, Fexinidazole 100 mg/kg PO

Systolic blood pressure (mm Hg)

| Time from dose (min) | 2482 |          | 2539 |          | 2552 |          | 2057 |          | Absolute Mean ± S.D. | Δ from 0 Mean ± S.D. | N |
|----------------------|------|----------|------|----------|------|----------|------|----------|----------------------|----------------------|---|
|                      | Abs. | Δ from 0 | Abs. | Δ from 0 | Abs. | Δ from 0 | Abs. | Δ from 0 |                      |                      |   |
| -60                  | 150  | -8       | 150  | -3       | 174  | 20       | 139  | -9       | 153 ± 14.8           | 0 ± 13.9             | 4 |
| -50                  | 155  | -3       | 145  | -9       | 147  | -7       | 146  | -2       | 148 ± 4.5            | -5 ± 3.0             | 4 |
| -40                  | 159  | 1        | 153  | 0        | 152  | -2       | 145  | -3       | 152 ± 5.7            | -1 ± 1.9             | 4 |
| -30                  | 152  | -6       | 156  | 3        | 151  | -3       | 154  | 6        | 153 ± 2.4            | 0 ± 5.3              | 4 |
| -20                  | 157  | -1       | 150  | -4       | 146  | -7       | 152  | 3        | 151 ± 4.4            | -2 ± 4.6             | 4 |
| -10                  | 175  | 17       | 167  | 13       | 152  | -2       | 154  | 6        | 162 ± 10.7           | 9 ± 8.2              | 4 |
| 0                    | 158  | 0        | 154  | 0        | 154  | 0        | 149  | 0        | 153 ± 3.8            | 0 ± 0.0              | 4 |
| 15                   | 168  | 10       | 136  | -18      | 162  | 8        | 133  | -15      | 150 ± 18.0           | -4 ± 15.1            | 4 |
| 30                   | 157  | -1       | 125  | -28      | 133  | -21      | 145  | -4       | 140 ± 13.9           | -13 ± 13.3           | 4 |
| 45                   | 151  | -7       | 161  | 7        | 142  | -12      | 143  | -5       | 149 ± 8.6            | -4 ± 7.9             | 4 |
| 60                   | 161  | 3        | 161  | 7        | 158  | 4        | 159  | 11       | 160 ± 1.2            | 6 ± 3.6              | 4 |
| 75                   | 132  | -25      | 143  | -11      | 143  | -11      | 142  | -6       | 140 ± 5.1            | -13 ± 8.3            | 4 |
| 90                   | 144  | -14      | 128  | -25      | 138  | -16      | 129  | -20      | 135 ± 7.5            | -19 ± 5.0            | 4 |
| 105                  | 150  | -8       | 130  | -23      | 148  | -6       | 128  | -21      | 139 ± 11.9           | -14 ± 9.1            | 4 |
| 120                  | 150  | -8       | 137  | -17      | 156  | 2        | 151  | 2        | 148 ± 8.1            | -5 ± 9.1             | 4 |
| 135                  | 146  | -12      | 135  | -18      | 146  | -8       | 134  | -15      | 140 ± 6.5            | -13 ± 4.3            | 4 |
| 150                  | 137  | -21      | 142  | -11      | 153  | 0        | 147  | -2       | 145 ± 6.8            | -8 ± 9.4             | 4 |
| 165                  | 144  | -14      | 137  | -17      | 165  | 12       | 150  | 1        | 149 ± 12.2           | -4 ± 13.3            | 4 |
| 180                  | 152  | -6       | 164  | 10       | 168  | 14       | 148  | 0        | 158 ± 9.2            | 5 ± 9.0              | 4 |
| 195                  | 155  | -3       | 130  | -23      | 151  | -3       | 142  | -7       | 144 ± 10.8           | -9 ± 9.6             | 4 |
| 210                  | 156  | -1       | 148  | -6       | 166  | 12       | 141  | -7       | 153 ± 10.6           | -1 ± 8.8             | 4 |
| 225                  | 151  | -7       | 142  | -11      | 154  | 1        | 146  | -3       | 148 ± 5.4            | -5 ± 5.2             | 4 |
| 240                  | 142  | -16      | 144  | -10      | 157  | 3        | 147  | -2       | 147 ± 6.7            | -6 ± 8.6             | 4 |
| 270                  | 140  | -18      | 138  | -16      | 146  | -7       | 152  | 3        | 144 ± 6.4            | -10 ± 9.7            | 4 |
| 300                  | 149  | -9       | 128  | -25      | 143  | -11      | 141  | -7       | 140 ± 8.7            | -13 ± 8.3            | 4 |
| 330                  | 137  | -21      | 146  | -8       | 137  | -17      | 133  | -15      | 138 ± 5.5            | -15 ± 5.6            | 4 |
| 360                  | 153  | -5       | 150  | -3       | 137  | -17      | 148  | 0        | 147 ± 7.0            | -6 ± 7.3             | 4 |
| 390                  | 149  | -9       | 150  | -4       | 160  | 6        | 146  | -2       | 151 ± 5.9            | -2 ± 6.2             | 4 |
| 420                  | 136  | -22      | 143  | -11      | 154  | 0        | 149  | 1        | 145 ± 7.8            | -8 ± 10.7            | 4 |

CONFIDENTIAL

Appendix 1.2 – Group 2, Fexinidazole 100 mg/kg PO

Diastolic blood pressure (mm Hg)

| Time from dose (min) | 2482 |          | 2539 |          | 2552 |          | 2057 |          | Absolute Mean ± S.D. | Δ from 0 Mean ± S.D. | N |
|----------------------|------|----------|------|----------|------|----------|------|----------|----------------------|----------------------|---|
|                      | Abs. | Δ from 0 | Abs. | Δ from 0 | Abs. | Δ from 0 | Abs. | Δ from 0 |                      |                      |   |
| -60                  | 88   | -3       | 86   | -2       | 101  | 0        | 81   | -17      | 89 ± 8.8             | -5 ± 7.6             | 4 |
| -50                  | 94   | 3        | 84   | -5       | 99   | -2       | 98   | 0        | 94 ± 7.1             | -1 ± 3.5             | 4 |
| -40                  | 89   | -2       | 85   | -3       | 101  | -1       | 93   | -5       | 92 ± 6.5             | -3 ± 1.6             | 4 |
| -30                  | 88   | -3       | 91   | 3        | 103  | 1        | 104  | 7        | 97 ± 8.0             | 2 ± 3.9              | 4 |
| -20                  | 95   | 4        | 82   | -7       | 99   | -2       | 104  | 7        | 95 ± 9.7             | 0 ± 6.2              | 4 |
| -10                  | 91   | 0        | 104  | 15       | 106  | 4        | 105  | 8        | 102 ± 6.9            | 7 ± 6.4              | 4 |
| 0                    | 91   | 0        | 89   | 0        | 102  | 0        | 97   | 0        | 95 ± 5.9             | 0 ± 0.0              | 4 |
| 15                   | 107  | 16       | 83   | -6       | 111  | 10       | 89   | -8       | 98 ± 13.6            | 3 ± 11.7             | 4 |
| 30                   | 92   | 1        | 75   | -14      | 90   | -11      | 98   | 0        | 89 ± 9.8             | -6 ± 7.8             | 4 |
| 45                   | 90   | -1       | 93   | 5        | 95   | -7       | 96   | -2       | 93 ± 2.7             | -1 ± 4.5             | 4 |
| 60                   | 94   | 3        | 90   | 1        | 108  | 7        | 108  | 11       | 100 ± 9.4            | 5 ± 4.2              | 4 |
| 75                   | 80   | -11      | 85   | -4       | 94   | -8       | 99   | 1        | 89 ± 8.6             | -5 ± 5.4             | 4 |
| 90                   | 87   | -4       | 79   | -9       | 93   | -9       | 89   | -9       | 87 ± 5.5             | -8 ± 2.7             | 4 |
| 105                  | 91   | 0        | 80   | -9       | 97   | -5       | 83   | -15      | 88 ± 7.9             | -7 ± 6.4             | 4 |
| 120                  | 88   | -3       | 82   | -7       | 109  | 8        | 104  | 6        | 96 ± 12.7            | 1 ± 6.9              | 4 |
| 135                  | 83   | -8       | 74   | -15      | 93   | -9       | 86   | -11      | 84 ± 8.1             | -11 ± 3.2            | 4 |
| 150                  | 76   | -15      | 84   | -5       | 101  | -1       | 100  | 3        | 90 ± 12.3            | -4 ± 7.6             | 4 |
| 165                  | 82   | -9       | 84   | -5       | 120  | 19       | 103  | 6        | 97 ± 18.1            | 3 ± 12.4             | 4 |
| 180                  | 93   | 2        | 99   | 10       | 111  | 10       | 100  | 3        | 101 ± 7.9            | 6 ± 4.7              | 4 |
| 195                  | 87   | -4       | 73   | -16      | 102  | 0        | 96   | -1       | 90 ± 12.6            | -5 ± 7.3             | 4 |
| 210                  | 91   | 0        | 89   | 0        | 115  | 14       | 96   | -2       | 98 ± 12.1            | 3 ± 7.3              | 4 |
| 225                  | 97   | 7        | 84   | -5       | 105  | 4        | 96   | -1       | 96 ± 8.9             | 1 ± 5.2              | 4 |
| 240                  | 88   | -3       | 88   | -1       | 104  | 2        | 107  | 10       | 97 ± 10.4            | 2 ± 5.8              | 4 |
| 270                  | 78   | -13      | 79   | -10      | 98   | -4       | 105  | 8        | 90 ± 13.6            | -5 ± 9.1             | 4 |
| 300                  | 86   | -4       | 72   | -16      | 99   | -3       | 104  | 7        | 90 ± 14.1            | -4 ± 9.5             | 4 |
| 330                  | 82   | -9       | 82   | -7       | 97   | -4       | 96   | -2       | 89 ± 8.4             | -5 ± 3.2             | 4 |
| 360                  | 93   | 2        | 91   | 3        | 102  | 0        | 108  | 11       | 99 ± 7.9             | 4 ± 4.7              | 4 |
| 390                  | 91   | 0        | 98   | 9        | 113  | 12       | 105  | 8        | 102 ± 9.7            | 7 ± 5.1              | 4 |
| 420                  | 82   | -9       | 85   | -4       | 103  | 2        | 116  | 18       | 96 ± 16.0            | 2 ± 11.9             | 4 |

CONFIDENTIAL

Appendix 1.2 – Group 2, Fexinidazole 100 mg/kg PO

Mean blood pressure (mm Hg)

| Time from dose (min) | 2482 |          | 2539 |          | 2552 |          | 2057 |          | Absolute Mean ± S.D. | Δ from 0 Mean ± S.D. | N |
|----------------------|------|----------|------|----------|------|----------|------|----------|----------------------|----------------------|---|
|                      | Abs. | Δ from 0 | Abs. | Δ from 0 | Abs. | Δ from 0 | Abs. | Δ from 0 |                      |                      |   |
| -60                  | 111  | -6       | 109  | -3       | 124  | 3        | 100  | -15      | 111 ± 10.2           | -5 ± 7.6             | 4 |
| -50                  | 117  | 1        | 106  | -6       | 118  | -4       | 113  | -2       | 114 ± 5.2            | -3 ± 2.9             | 4 |
| -40                  | 117  | 1        | 111  | -2       | 121  | 0        | 112  | -3       | 115 ± 4.9            | -1 ± 1.8             | 4 |
| -30                  | 111  | -6       | 116  | 3        | 123  | 1        | 120  | 6        | 117 ± 5.4            | 1 ± 4.8              | 4 |
| -20                  | 118  | 2        | 105  | -7       | 118  | -4       | 120  | 6        | 115 ± 6.9            | -1 ± 5.7             | 4 |
| -10                  | 123  | 7        | 127  | 15       | 124  | 3        | 124  | 9        | 125 ± 1.8            | 8 ± 5.0              | 4 |
| 0                    | 116  | 0        | 112  | 0        | 121  | 0        | 115  | 0        | 116 ± 3.8            | 0 ± 0.0              | 4 |
| 15                   | 131  | 15       | 103  | -10      | 132  | 11       | 106  | -9       | 118 ± 15.9           | 2 ± 12.9             | 4 |
| 30                   | 118  | 2        | 92   | -20      | 107  | -14      | 115  | 0        | 108 ± 11.3           | -8 ± 10.5            | 4 |
| 45                   | 114  | -2       | 119  | 6        | 113  | -8       | 114  | -1       | 115 ± 2.6            | -1 ± 6.0             | 4 |
| 60                   | 121  | 5        | 117  | 5        | 129  | 8        | 127  | 13       | 124 ± 5.4            | 8 ± 3.6              | 4 |
| 75                   | 101  | -15      | 107  | -5       | 114  | -7       | 115  | 0        | 109 ± 6.7            | -7 ± 6.5             | 4 |
| 90                   | 109  | -7       | 98   | -14      | 111  | -10      | 103  | -12      | 105 ± 5.8            | -11 ± 2.8            | 4 |
| 105                  | 113  | -3       | 98   | -15      | 117  | -4       | 99   | -16      | 107 ± 9.8            | -10 ± 6.7            | 4 |
| 120                  | 110  | -6       | 100  | -12      | 127  | 6        | 120  | 5        | 114 ± 11.7           | -2 ± 8.8             | 4 |
| 135                  | 105  | -12      | 94   | -18      | 113  | -8       | 102  | -13      | 104 ± 7.9            | -13 ± 4.2            | 4 |
| 150                  | 99   | -17      | 105  | -8       | 121  | 0        | 116  | 1        | 110 ± 10.3           | -6 ± 8.6             | 4 |
| 165                  | 104  | -12      | 103  | -9       | 138  | 17       | 119  | 4        | 116 ± 16.3           | 0 ± 13.2             | 4 |
| 180                  | 116  | 0        | 123  | 10       | 135  | 14       | 118  | 3        | 123 ± 8.4            | 7 ± 6.3              | 4 |
| 195                  | 112  | -4       | 94   | -18      | 121  | -1       | 112  | -3       | 110 ± 11.2           | -6 ± 8.0             | 4 |
| 210                  | 115  | -2       | 108  | -4       | 136  | 15       | 112  | -3       | 118 ± 12.6           | 1 ± 9.0              | 4 |
| 225                  | 119  | 2        | 105  | -7       | 125  | 4        | 115  | 0        | 116 ± 8.2            | 0 ± 4.7              | 4 |
| 240                  | 107  | -9       | 108  | -4       | 124  | 3        | 120  | 5        | 115 ± 8.6            | -1 ± 6.6             | 4 |
| 270                  | 99   | -17      | 99   | -13      | 117  | -5       | 121  | 7        | 109 ± 11.6           | -7 ± 10.5            | 4 |
| 300                  | 109  | -7       | 91   | -21      | 116  | -6       | 116  | 1        | 108 ± 11.5           | -8 ± 9.3             | 4 |
| 330                  | 102  | -14      | 104  | -8       | 112  | -9       | 109  | -6       | 107 ± 4.6            | -9 ± 3.5             | 4 |
| 360                  | 115  | -2       | 112  | 0        | 115  | -6       | 122  | 8        | 116 ± 4.5            | 0 ± 5.7              | 4 |
| 390                  | 111  | -5       | 115  | 3        | 132  | 10       | 120  | 5        | 120 ± 8.8            | 3 ± 6.4              | 4 |
| 420                  | 100  | -16      | 105  | -7       | 123  | 1        | 127  | 12       | 114 ± 12.8           | -2 ± 11.8            | 4 |

CONFIDENTIAL

Appendix 1.2 – Group 2, Fexinidazole 100 mg/kg PO

Heart rate (beats/min)

| Time from dose (min) | 2482 |          | 2539 |          | 2552 |          | 2057 |          | Absolute Mean ± S.D. | Δ from 0 Mean ± S.D. | N |
|----------------------|------|----------|------|----------|------|----------|------|----------|----------------------|----------------------|---|
|                      | Abs. | Δ from 0 | Abs. | Δ from 0 | Abs. | Δ from 0 | Abs. | Δ from 0 |                      |                      |   |
| -60                  | 68   | -19      | 83   | -32      | 123  | 5        | 70   | -22      | 86 ± 25.8            | -17 ± 15.8           | 4 |
| -50                  | 73   | -14      | 109  | -7       | 112  | -6       | 84   | -8       | 94 ± 19.2            | -9 ± 3.4             | 4 |
| -40                  | 108  | 22       | 125  | 9        | 126  | 7        | 107  | 15       | 117 ± 10.2           | 14 ± 6.6             | 4 |
| -30                  | 76   | -10      | 134  | 18       | 115  | -4       | 79   | -12      | 101 ± 27.8           | -2 ± 13.8            | 4 |
| -20                  | 92   | 6        | 95   | -21      | 103  | -15      | 77   | -15      | 92 ± 11.2            | -11 ± 11.7           | 4 |
| -10                  | 100  | 14       | 149  | 33       | 131  | 12       | 134  | 42       | 128 ± 20.3           | 25 ± 14.4            | 4 |
| 0                    | 86   | 0        | 116  | 0        | 118  | 0        | 92   | 0        | 103 ± 16.4           | 0 ± 0.0              | 4 |
| 15                   | 99   | 13       | 115  | 0        | 129  | 11       | 124  | 32       | 117 ± 13.2           | 14 ± 13.6            | 4 |
| 30                   | 121  | 35       | 107  | -9       | 104  | -15      | 99   | 8        | 108 ± 9.4            | 5 ± 22.3             | 4 |
| 45                   | 113  | 27       | 151  | 35       | 127  | 9        | 139  | 47       | 132 ± 16.2           | 29 ± 16.1            | 4 |
| 60                   | 106  | 20       | 164  | 48       | 152  | 34       | 121  | 29       | 136 ± 26.9           | 33 ± 11.9            | 4 |
| 75                   | 109  | 23       | 141  | 25       | 125  | 7        | 147  | 55       | 131 ± 16.9           | 28 ± 20.2            | 4 |
| 90                   | 76   | -10      | 132  | 16       | 117  | -1       | 105  | 13       | 107 ± 23.9           | 5 ± 12.3             | 4 |
| 105                  | 95   | 9        | 112  | -4       | 115  | -4       | 101  | 10       | 106 ± 9.2            | 3 ± 7.5              | 4 |
| 120                  | 77   | -9       | 114  | -1       | 117  | -1       | 103  | 11       | 103 ± 18.1           | 0 ± 8.0              | 4 |
| 135                  | 74   | -12      | 81   | -35      | 103  | -15      | 90   | -2       | 87 ± 12.8            | -16 ± 13.9           | 4 |
| 150                  | 91   | 5        | 113  | -3       | 99   | -19      | 86   | -6       | 97 ± 11.6            | -6 ± 9.9             | 4 |
| 165                  | 77   | -10      | 139  | 24       | 112  | -6       | 93   | 1        | 105 ± 27.0           | 2 ± 14.8             | 4 |
| 180                  | 111  | 25       | 119  | 3        | 107  | -11      | 124  | 32       | 115 ± 7.3            | 12 ± 19.7            | 4 |
| 195                  | 84   | -3       | 111  | -5       | 97   | -21      | 94   | 2        | 96 ± 11.3            | -7 ± 9.9             | 4 |
| 210                  | 78   | -8       | 94   | -22      | 123  | 5        | 99   | 7        | 99 ± 18.7            | -4 ± 13.5            | 4 |
| 225                  | 83   | -3       | 86   | -30      | 114  | -4       | 142  | 50       | 106 ± 27.8           | 3 ± 33.8             | 4 |
| 240                  | 69   | -17      | 94   | -22      | 105  | -13      | 87   | -5       | 89 ± 15.1            | -14 ± 7.2            | 4 |
| 270                  | 67   | -19      | 79   | -37      | 100  | -19      | 102  | 10       | 87 ± 16.9            | -16 ± 19.4           | 4 |
| 300                  | 74   | -13      | 73   | -42      | 113  | -5       | 104  | 12       | 91 ± 20.6            | -12 ± 22.9           | 4 |
| 330                  | 73   | -13      | 73   | -42      | 107  | -11      | 113  | 22       | 92 ± 21.6            | -11 ± 26.1           | 4 |
| 360                  | 78   | -9       | 104  | -12      | 106  | -12      | 130  | 38       | 104 ± 21.5           | 1 ± 24.6             | 4 |
| 390                  | 80   | -6       | 104  | -12      | 122  | 4        | 115  | 23       | 105 ± 18.7           | 2 ± 15.6             | 4 |
| 420                  | 75   | -11      | 101  | -14      | 101  | -17      | 131  | 39       | 102 ± 23.0           | -1 ± 26.8            | 4 |

CONFIDENTIAL

Appendix 1.2 – Group 2, Fexinidazole 100 mg/kg PO

Uncorrected QT interval (msec)

| Time from dose (min) | 2482 |          | 2539 |          | 2552 |          | 2057 |          | Absolute Mean ± S.D. | Δ from 0 Mean ± S.D. | N |
|----------------------|------|----------|------|----------|------|----------|------|----------|----------------------|----------------------|---|
|                      | Abs. | Δ from 0 | Abs. | Δ from 0 | Abs. | Δ from 0 | Abs. | Δ from 0 |                      |                      |   |
| -60                  | 214  | 14       | 203  | 27       | 178  | 1        | 197  | 4        | 198 ± 14.9           | 11 ± 11.5            | 4 |
| -50                  | 212  | 12       | 195  | 19       | 179  | 1        | 200  | 7        | 196 ± 13.9           | 10 ± 7.5             | 4 |
| -40                  | 196  | -4       | 168  | -7       | 172  | -5       | 191  | -2       | 182 ± 13.6           | -5 ± 2.4             | 4 |
| -30                  | 192  | -8       | 174  | -2       | 180  | 2        | 191  | -2       | 184 ± 8.9            | -2 ± 4.1             | 4 |
| -20                  | 201  | 1        | 184  | 8        | 181  | 4        | 202  | 9        | 192 ± 11.1           | 6 ± 3.6              | 4 |
| -10                  | 184  | -16      | 132  | -44      | 174  | -3       | 176  | -17      | 166 ± 23.6           | -20 ± 17.3           | 4 |
| 0                    | 200  | 0        | 176  | 0        | 177  | 0        | 193  | 0        | 186 ± 11.8           | 0 ± 0.0              | 4 |
| 15                   | 186  | -14      | 200  | 24       | 175  | -2       | 191  | -2       | 188 ± 10.4           | 2 ± 16.1             | 4 |
| 30                   | 173  | -27      | 192  | 16       | 185  | 7        | 196  | 3        | 186 ± 10.2           | 0 ± 18.8             | 4 |
| 45                   | 185  | -15      | 162  | -14      | 166  | -12      | 186  | -7       | 175 ± 12.6           | -12 ± 3.4            | 4 |
| 60                   | 186  | -14      | 146  | -30      | 165  | -12      | 163  | -30      | 165 ± 16.5           | -21 ± 9.8            | 4 |
| 75                   | 190  | -10      | 141  | -35      | 175  | -2       | 177  | -16      | 171 ± 20.9           | -16 ± 14.1           | 4 |
| 90                   | 203  | 3        | 198  | 22       | 181  | 4        | 195  | 3        | 194 ± 9.3            | 8 ± 9.5              | 4 |
| 105                  | 198  | -1       | 231  | 55       | 188  | 11       | 191  | -2       | 202 ± 19.4           | 16 ± 26.7            | 4 |
| 120                  | 204  | 5        | 193  | 17       | 189  | 12       | 187  | -6       | 193 ± 7.8            | 7 ± 10.0             | 4 |
| 135                  | 214  | 14       | 225  | 50       | 190  | 13       | 200  | 7        | 207 ± 15.5           | 21 ± 19.4            | 4 |
| 150                  | 212  | 13       | 212  | 36       | 192  | 15       | 195  | 2        | 203 ± 10.9           | 16 ± 14.4            | 4 |
| 165                  | 220  | 20       | 201  | 25       | 192  | 15       | 206  | 13       | 205 ± 11.7           | 18 ± 5.5             | 4 |
| 180                  | 195  | -4       | 170  | -5       | 188  | 11       | 179  | -14      | 183 ± 10.9           | -3 ± 10.4            | 4 |
| 195                  | 206  | 6        | 200  | 24       | 192  | 15       | 199  | 6        | 199 ± 5.6            | 13 ± 8.8             | 4 |
| 210                  | 211  | 11       | 236  | 60       | 199  | 22       | 189  | -3       | 209 ± 20.0           | 22 ± 27.1            | 4 |
| 225                  | 210  | 10       | 232  | 56       | 190  | 13       | 184  | -9       | 204 ± 21.7           | 18 ± 27.4            | 4 |
| 240                  | 218  | 18       | 221  | 45       | 187  | 10       | 213  | 20       | 210 ± 15.4           | 23 ± 15.3            | 4 |
| 270                  | 230  | 30       | 258  | 82       | 202  | 25       | 206  | 13       | 224 ± 25.8           | 37 ± 30.6            | 4 |
| 300                  | 236  | 36       | 225  | 49       | 204  | 27       | 213  | 20       | 219 ± 14.0           | 33 ± 12.6            | 4 |
| 330                  | 235  | 35       | 261  | 85       | 207  | 29       | 208  | 15       | 228 ± 25.8           | 41 ± 30.5            | 4 |
| 360                  | 216  | 16       | 193  | 17       | 194  | 17       | 184  | -9       | 197 ± 13.5           | 10 ± 12.7            | 4 |
| 390                  | 216  | 17       | 201  | 26       | 182  | 4        | 194  | 1        | 198 ± 14.6           | 12 ± 11.3            | 4 |
| 420                  | 221  | 21       | 225  | 49       | 193  | 16       | 191  | -2       | 208 ± 17.9           | 21 ± 21.1            | 4 |

CONFIDENTIAL

Appendix 1.2 – Group 2, Fexinidazole 100 mg/kg PO

Corrected QT interval (covariate analysis, QTca) (msec)

| Time from dose (min) | 2482 |          | 2539 |          | 2552 |          | 2057 |          | Absolute Mean ± S.D. | Δ from 0 Mean ± S.D. | N |
|----------------------|------|----------|------|----------|------|----------|------|----------|----------------------|----------------------|---|
|                      | Abs. | Δ from 0 | Abs. | Δ from 0 | Abs. | Δ from 0 | Abs. | Δ from 0 |                      |                      |   |
| -60                  | 194  | 3        | 193  | 13       | 182  | -1       | 178  | -7       | 187 ± 8.0            | 2 ± 8.7              | 4 |
| -50                  | 196  | 5        | 198  | 18       | 182  | 0        | 195  | 9        | 193 ± 7.1            | 8 ± 7.8              | 4 |
| -40                  | 199  | 8        | 177  | -2       | 181  | -2       | 192  | 6        | 187 ± 10.3           | 3 ± 5.4              | 4 |
| -30                  | 178  | -14      | 186  | 6        | 185  | 3        | 176  | -10      | 181 ± 5.1            | -4 ± 9.6             | 4 |
| -20                  | 197  | 5        | 180  | 1        | 182  | -1       | 187  | 1        | 186 ± 7.3            | 1 ± 2.5              | 4 |
| -10                  | 184  | -8       | 144  | -36      | 183  | 1        | 187  | 1        | 174 ± 20.6           | -10 ± 17.4           | 4 |
| 0                    | 191  | 0        | 180  | 0        | 183  | 0        | 186  | 0        | 185 ± 5.1            | 0 ± 0.0              | 4 |
| 15                   | 185  | -6       | 207  | 28       | 185  | 3        | 199  | 13       | 194 ± 10.9           | 9 ± 14.6             | 4 |
| 30                   | 180  | -11      | 190  | 10       | 185  | 2        | 195  | 9        | 187 ± 6.4            | 2 ± 9.9              | 4 |
| 45                   | 190  | -1       | 177  | -2       | 175  | -8       | 200  | 15       | 186 ± 12.0           | 1 ± 9.7              | 4 |
| 60                   | 188  | -4       | 163  | -17      | 182  | -1       | 169  | -17      | 175 ± 11.3           | -9 ± 8.4             | 4 |
| 75                   | 193  | 2        | 152  | -27      | 184  | 2        | 192  | 7        | 181 ± 19.3           | -4 ± 15.5            | 4 |
| 90                   | 190  | -2       | 209  | 30       | 187  | 5        | 195  | 9        | 195 ± 9.9            | 11 ± 13.6            | 4 |
| 105                  | 194  | 3        | 233  | 54       | 193  | 10       | 192  | 6        | 203 ± 20.2           | 18 ± 23.9            | 4 |
| 120                  | 191  | 0        | 195  | 15       | 196  | 13       | 186  | 0        | 192 ± 4.3            | 7 ± 8.3              | 4 |
| 135                  | 197  | 5        | 211  | 32       | 190  | 7        | 192  | 6        | 198 ± 9.6            | 13 ± 12.8            | 4 |
| 150                  | 206  | 15       | 217  | 38       | 189  | 7        | 186  | 0        | 200 ± 14.8           | 15 ± 16.5            | 4 |
| 165                  | 207  | 15       | 214  | 34       | 196  | 13       | 197  | 11       | 203 ± 8.6            | 18 ± 10.8            | 4 |
| 180                  | 200  | 9        | 176  | -4       | 191  | 8        | 186  | 0        | 188 ± 10.1           | 4 ± 6.1              | 4 |
| 195                  | 197  | 5        | 204  | 25       | 187  | 4        | 193  | 7        | 195 ± 7.3            | 10 ± 9.7             | 4 |
| 210                  | 199  | 7        | 227  | 48       | 203  | 21       | 186  | 0        | 204 ± 17.2           | 19 ± 20.9            | 4 |
| 225                  | 201  | 10       | 225  | 46       | 194  | 11       | 199  | 13       | 205 ± 13.8           | 20 ± 17.0            | 4 |
| 240                  | 200  | 9        | 215  | 35       | 189  | 6        | 203  | 17       | 202 ± 10.5           | 17 ± 12.9            | 4 |
| 270                  | 210  | 18       | 242  | 63       | 198  | 16       | 206  | 20       | 214 ± 19.3           | 29 ± 22.3            | 4 |
| 300                  | 216  | 25       | 206  | 27       | 208  | 25       | 212  | 26       | 211 ± 4.5            | 26 ± 0.9             | 4 |
| 330                  | 217  | 26       | 240  | 61       | 207  | 25       | 210  | 24       | 219 ± 15.0           | 34 ± 17.9            | 4 |
| 360                  | 201  | 10       | 194  | 15       | 196  | 13       | 195  | 9        | 197 ± 3.1            | 12 ± 2.7             | 4 |
| 390                  | 203  | 11       | 202  | 22       | 189  | 7        | 198  | 12       | 198 ± 6.2            | 13 ± 6.7             | 4 |
| 420                  | 206  | 15       | 224  | 44       | 193  | 10       | 203  | 17       | 206 ± 12.9           | 22 ± 15.4            | 4 |

CONFIDENTIAL

Appendix 1.2 – Group 2, Fexinidazole 100 mg/kg PO

PR interval (msec)

| Time from dose (min) | 2482 |          | 2539 |          | 2552 |          | 2057 |          | Absolute Mean ± S.D. | Δ from 0 Mean ± S.D. | N |
|----------------------|------|----------|------|----------|------|----------|------|----------|----------------------|----------------------|---|
|                      | Abs. | Δ from 0 | Abs. | Δ from 0 | Abs. | Δ from 0 | Abs. | Δ from 0 |                      |                      |   |
| -60                  | 108  | 5        | 97   | 6        | 89   | -1       | 86   | -3       | 95 ± 9.9             | 2 ± 4.3              | 4 |
| -50                  | 108  | 5        | 98   | 7        | 89   | -2       | 90   | 1        | 96 ± 9.2             | 3 ± 3.8              | 4 |
| -40                  | 98   | -5       | 89   | -3       | 93   | 2        | 89   | 1        | 92 ± 4.2             | -1 ± 3.3             | 4 |
| -30                  | 100  | -3       | 87   | -5       | 94   | 4        | 87   | -2       | 92 ± 6.3             | -1 ± 3.8             | 4 |
| -20                  | 108  | 4        | 96   | 4        | 88   | -2       | 94   | 5        | 96 ± 8.1             | 3 ± 3.5              | 4 |
| -10                  | 97   | -6       | 82   | -10      | 89   | -2       | 86   | -2       | 89 ± 6.2             | -5 ± 3.8             | 4 |
| 0                    | 103  | 0        | 92   | 0        | 90   | 0        | 89   | 0        | 93 ± 6.6             | 0 ± 0.0              | 4 |
| 15                   | 101  | -2       | 93   | 2        | 98   | 8        | 92   | 4        | 96 ± 4.1             | 3 ± 4.1              | 4 |
| 30                   | 95   | -8       | 95   | 4        | 93   | 3        | 87   | -2       | 93 ± 3.8             | -1 ± 5.5             | 4 |
| 45                   | 101  | -3       | 85   | -7       | 89   | -2       | 85   | -4       | 90 ± 7.5             | -4 ± 2.3             | 4 |
| 60                   | 99   | -4       | 83   | -9       | 91   | 1        | 82   | -7       | 89 ± 8.1             | -5 ± 4.0             | 4 |
| 75                   | 98   | -5       | 89   | -2       | 92   | 2        | 88   | -1       | 92 ± 4.4             | -2 ± 2.9             | 4 |
| 90                   | 107  | 4        | 99   | 7        | 95   | 4        | 93   | 4        | 98 ± 6.4             | 5 ± 1.5              | 4 |
| 105                  | 101  | -2       | 100  | 8        | 90   | 0        | 89   | 1        | 95 ± 6.0             | 2 ± 4.4              | 4 |
| 120                  | 106  | 2        | 96   | 4        | 100  | 10       | 86   | -2       | 97 ± 8.2             | 4 ± 5.1              | 4 |
| 135                  | 106  | 3        | 105  | 13       | 92   | 1        | 92   | 3        | 99 ± 8.0             | 5 ± 5.4              | 4 |
| 150                  | 104  | 1        | 104  | 13       | 96   | 5        | 91   | 2        | 99 ± 6.7             | 5 ± 5.1              | 4 |
| 165                  | 105  | 2        | 100  | 8        | 93   | 2        | 95   | 6        | 98 ± 5.4             | 5 ± 2.9              | 4 |
| 180                  | 105  | 1        | 101  | 9        | 96   | 5        | 89   | 0        | 97 ± 6.8             | 4 ± 3.9              | 4 |
| 195                  | 101  | -2       | 99   | 7        | 93   | 2        | 93   | 4        | 96 ± 4.3             | 3 ± 3.8              | 4 |
| 210                  | 108  | 5        | 100  | 8        | 98   | 7        | 89   | 0        | 99 ± 7.9             | 5 ± 3.6              | 4 |
| 225                  | 112  | 9        | 103  | 12       | 96   | 6        | 83   | -6       | 98 ± 12.3            | 5 ± 7.7              | 4 |
| 240                  | 111  | 8        | 111  | 19       | 96   | 5        | 100  | 12       | 104 ± 7.6            | 11 ± 5.9             | 4 |
| 270                  | 111  | 8        | 97   | 5        | 96   | 6        | 95   | 6        | 100 ± 7.6            | 6 ± 1.2              | 4 |
| 300                  | 104  | 1        | 108  | 16       | 95   | 5        | 92   | 4        | 100 ± 7.5            | 6 ± 6.7              | 4 |
| 330                  | 104  | 0        | 110  | 18       | 94   | 4        | 91   | 3        | 100 ± 8.5            | 6 ± 8.1              | 4 |
| 360                  | 105  | 1        | 101  | 9        | 90   | 0        | 84   | -5       | 95 ± 9.6             | 1 ± 5.8              | 4 |
| 390                  | 106  | 2        | 100  | 9        | 90   | 0        | 88   | 0        | 96 ± 8.2             | 3 ± 4.2              | 4 |
| 420                  | 101  | -2       | 99   | 7        | 95   | 4        | 85   | -3       | 95 ± 6.8             | 1 ± 4.9              | 4 |



CONFIDENTIAL

Appendix 1.2 – Group 2, Fexinidazole 100 mg/kg PO

QRS interval (msec)

| Time from dose (min) | 2482 |          | 2539 |          | 2552 |          | 2057 |          | Absolute Mean ± S.D. | Δ from 0 Mean ± S.D. | N |
|----------------------|------|----------|------|----------|------|----------|------|----------|----------------------|----------------------|---|
|                      | Abs. | Δ from 0 | Abs. | Δ from 0 | Abs. | Δ from 0 | Abs. | Δ from 0 |                      |                      |   |
| -60                  | 40   | 1        | 38   | -1       | 37   | 1        | 39   | -1       | 38 ± 1.4             | 0 ± 0.8              | 4 |
| -50                  | 40   | 1        | 42   | 3        | 37   | 1        | 40   | 1        | 40 ± 1.9             | 1 ± 1.2              | 4 |
| -40                  | 40   | 0        | 39   | 0        | 37   | 1        | 39   | 0        | 39 ± 1.2             | 0 ± 0.5              | 4 |
| -30                  | 40   | 1        | 37   | -2       | 37   | 1        | 41   | 2        | 39 ± 2.2             | 0 ± 1.6              | 4 |
| -20                  | 39   | 0        | 41   | 3        | 36   | 0        | 39   | 0        | 39 ± 2.2             | 0 ± 1.5              | 4 |
| -10                  | 37   | -3       | 35   | -3       | 33   | -3       | 38   | -1       | 36 ± 1.9             | -3 ± 0.9             | 4 |
| 0                    | 39   | 0        | 39   | 0        | 36   | 0        | 39   | 0        | 38 ± 1.4             | 0 ± 0.0              | 4 |
| 15                   | 38   | -1       | 36   | -2       | 38   | 2        | 39   | -1       | 38 ± 1.2             | -1 ± 1.8             | 4 |
| 30                   | 38   | -1       | 41   | 2        | 37   | 1        | 39   | 0        | 39 ± 1.6             | 0 ± 1.4              | 4 |
| 45                   | 38   | -1       | 36   | -3       | 38   | 1        | 40   | 1        | 38 ± 1.9             | 0 ± 2.0              | 4 |
| 60                   | 38   | -2       | 37   | -1       | 37   | 0        | 37   | -3       | 37 ± 0.6             | -1 ± 1.3             | 4 |
| 75                   | 38   | -1       | 39   | 1        | 36   | 0        | 38   | -1       | 38 ± 1.2             | 0 ± 1.0              | 4 |
| 90                   | 39   | 0        | 38   | 0        | 36   | 0        | 40   | 1        | 38 ± 1.7             | 0 ± 0.4              | 4 |
| 105                  | 39   | 0        | 53   | 14       | 37   | 1        | 39   | 0        | 42 ± 7.3             | 4 ± 7.0              | 4 |
| 120                  | 40   | 0        | 41   | 2        | 38   | 1        | 41   | 2        | 40 ± 1.5             | 1 ± 0.8              | 4 |
| 135                  | 37   | -2       | 41   | 2        | 39   | 3        | 39   | 0        | 39 ± 1.6             | 1 ± 2.3              | 4 |
| 150                  | 39   | -1       | 47   | 8        | 38   | 2        | 39   | 0        | 41 ± 4.0             | 2 ± 4.0              | 4 |
| 165                  | 40   | 1        | 40   | 2        | 39   | 3        | 42   | 3        | 40 ± 1.4             | 2 ± 1.0              | 4 |
| 180                  | 38   | -1       | 39   | 0        | 40   | 3        | 39   | 0        | 39 ± 0.6             | 1 ± 1.9              | 4 |
| 195                  | 39   | 0        | 41   | 3        | 37   | 0        | 42   | 3        | 40 ± 2.6             | 1 ± 1.8              | 4 |
| 210                  | 39   | 0        | 43   | 4        | 39   | 3        | 40   | 1        | 40 ± 1.8             | 2 ± 2.0              | 4 |
| 225                  | 39   | 0        | 48   | 10       | 37   | 0        | 40   | 1        | 41 ± 5.1             | 3 ± 4.8              | 4 |
| 240                  | 40   | 1        | 40   | 2        | 37   | 1        | 42   | 3        | 40 ± 2.0             | 2 ± 1.1              | 4 |
| 270                  | 50   | 10       | 47   | 8        | 36   | 0        | 42   | 3        | 44 ± 5.8             | 5 ± 4.7              | 4 |
| 300                  | 58   | 19       | 40   | 2        | 38   | 1        | 43   | 4        | 45 ± 9.2             | 6 ± 8.4              | 4 |
| 330                  | 39   | 0        | 42   | 4        | 37   | 1        | 41   | 2        | 40 ± 2.3             | 2 ± 1.6              | 4 |
| 360                  | 41   | 2        | 39   | 1        | 36   | 0        | 40   | 1        | 39 ± 2.1             | 1 ± 0.7              | 4 |
| 390                  | 34   | -6       | 40   | 1        | 36   | 0        | 41   | 2        | 38 ± 3.6             | -1 ± 3.6             | 4 |
| 420                  | 40   | 1        | 43   | 5        | 35   | -1       | 41   | 1        | 40 ± 3.3             | 2 ± 2.4              | 4 |

CONFIDENTIAL

Appendix 1.2 – Group 2, Fexinidazole 100 mg/kg PO

RR interval (msec)

| Time from dose (min) | 2482 |          | 2539 |          | 2552 |          | 2057 |          | Absolute Mean ± S.D. | Δ from 0 Mean ± S.D. | N |
|----------------------|------|----------|------|----------|------|----------|------|----------|----------------------|----------------------|---|
|                      | Abs. | Δ from 0 | Abs. | Δ from 0 | Abs. | Δ from 0 | Abs. | Δ from 0 |                      |                      |   |
| -60                  | 909  | 173      | 741  | 190      | 548  | 19       | 930  | 204      | 782 ± 177.7          | 146 ± 85.7           | 4 |
| -50                  | 840  | 104      | 564  | 13       | 549  | 20       | 673  | -54      | 656 ± 134.5          | 21 ± 64.5            | 4 |
| -40                  | 553  | -183     | 482  | -68      | 481  | -48      | 586  | -141     | 525 ± 52.6           | -110 ± 62.9          | 4 |
| -30                  | 846  | 110      | 454  | -97      | 524  | -4       | 866  | 140      | 673 ± 214.0          | 37 ± 108.6           | 4 |
| -20                  | 665  | -71      | 655  | 104      | 591  | 63       | 846  | 119      | 689 ± 109.4          | 54 ± 86.8            | 4 |
| -10                  | 605  | -132     | 408  | -143     | 478  | -50      | 457  | -269     | 487 ± 83.7           | -148 ± 90.4          | 4 |
| 0                    | 736  | 0        | 551  | 0        | 528  | 0        | 726  | 0        | 635 ± 111.2          | 0 ± 0.0              | 4 |
| 15                   | 615  | -121     | 517  | -34      | 469  | -59      | 502  | -224     | 526 ± 62.9           | -110 ± 84.6          | 4 |
| 30                   | 502  | -234     | 627  | 76       | 599  | 70       | 618  | -109     | 586 ± 57.2           | -49 ± 150.2          | 4 |
| 45                   | 534  | -203     | 404  | -147     | 477  | -51      | 430  | -296     | 461 ± 57.1           | -174 ± 102.7         | 4 |
| 60                   | 580  | -157     | 370  | -181     | 394  | -134     | 513  | -213     | 464 ± 99.1           | -171 ± 33.7          | 4 |
| 75                   | 555  | -181     | 427  | -123     | 483  | -45      | 415  | -311     | 470 ± 63.9           | -165 ± 112.3         | 4 |
| 90                   | 797  | 61       | 470  | -81      | 518  | -10      | 604  | -122     | 597 ± 144.4          | -38 ± 80.5           | 4 |
| 105                  | 657  | -79      | 568  | 18       | 537  | 9        | 594  | -133     | 589 ± 51.1           | -46 ± 72.2           | 4 |
| 120                  | 809  | 73       | 574  | 24       | 517  | -12      | 609  | -117     | 627 ± 127.2          | -8 ± 80.7            | 4 |
| 135                  | 861  | 124      | 794  | 243      | 600  | 71       | 715  | -11      | 742 ± 112.1          | 107 ± 106.3          | 4 |
| 150                  | 680  | -56      | 539  | -12      | 636  | 108      | 737  | 11       | 648 ± 83.9           | 13 ± 69.4            | 4 |
| 165                  | 791  | 55       | 455  | -96      | 556  | 28       | 726  | 0        | 632 ± 154.1          | -3 ± 65.6            | 4 |
| 180                  | 541  | -196     | 522  | -28      | 562  | 33       | 503  | -223     | 532 ± 25.0           | -104 ± 125.4         | 4 |
| 195                  | 730  | -6       | 547  | -3       | 680  | 152      | 677  | -49      | 659 ± 78.1           | 23 ± 88.2            | 4 |
| 210                  | 780  | 44       | 705  | 154      | 546  | 18       | 650  | -76      | 670 ± 98.5           | 35 ± 94.7            | 4 |
| 225                  | 723  | -13      | 684  | 133      | 549  | 21       | 424  | -302     | 595 ± 136.1          | -40 ± 185.3          | 4 |
| 240                  | 863  | 126      | 686  | 135      | 576  | 47       | 743  | 17       | 717 ± 119.5          | 81 ± 58.4            | 4 |
| 270                  | 898  | 161      | 793  | 242      | 648  | 120      | 600  | -126     | 735 ± 136.0          | 99 ± 158.5           | 4 |
| 300                  | 877  | 140      | 870  | 320      | 552  | 23       | 607  | -119     | 726 ± 171.3          | 91 ± 185.7           | 4 |
| 330                  | 848  | 111      | 866  | 315      | 590  | 62       | 583  | -144     | 721 ± 156.2          | 86 ± 188.3           | 4 |
| 360                  | 817  | 81       | 581  | 30       | 578  | 50       | 468  | -259     | 611 ± 147.3          | -25 ± 157.5          | 4 |
| 390                  | 800  | 63       | 594  | 43       | 503  | -25      | 545  | -182     | 610 ± 131.7          | -25 ± 111.1          | 4 |
| 420                  | 807  | 71       | 614  | 63       | 597  | 69       | 467  | -259     | 621 ± 140.1          | -14 ± 163.5          | 4 |

CONFIDENTIAL

Appendix 1.2 – Group 2, Fexinidazole 100 mg/kg PO

Body temperature (°C)

| Time from dose (min) | 2482 |          | 2539 |          | 2552 |          | 2057 |          | Absolute Mean ± S.D. | Δ from 0 Mean ± S.D. | N |
|----------------------|------|----------|------|----------|------|----------|------|----------|----------------------|----------------------|---|
|                      | Abs. | Δ from 0 | Abs. | Δ from 0 | Abs. | Δ from 0 | Abs. | Δ from 0 |                      |                      |   |
| -60                  | 38.1 | -0.2     | 38.2 | -0.1     | 39.1 | 0.0      | 37.3 | -0.3     | 38.2 ± 0.75          | -0.2 ± 0.1           | 4 |
| -50                  | 38.1 | -0.1     | 38.2 | -0.1     | 39.2 | 0.0      | 37.5 | -0.1     | 38.3 ± 0.70          | -0.1 ± 0.1           | 4 |
| -40                  | 38.1 | -0.2     | 38.3 | -0.1     | 39.2 | 0.0      | 37.5 | -0.1     | 38.3 ± 0.71          | -0.1 ± 0.1           | 4 |
| -30                  | 38.4 | 0.1      | 38.4 | 0.0      | 39.2 | 0.0      | 37.6 | 0.0      | 38.4 ± 0.67          | 0.0 ± 0.1            | 4 |
| -20                  | 38.4 | 0.2      | 38.4 | 0.0      | 39.2 | 0.0      | 37.8 | 0.2      | 38.4 ± 0.58          | 0.1 ± 0.1            | 4 |
| -10                  | 38.4 | 0.2      | 38.6 | 0.3      | 39.2 | 0.0      | 37.9 | 0.3      | 38.5 ± 0.53          | 0.2 ± 0.1            | 4 |
| 0                    | 38.2 | 0.0      | 38.3 | 0.0      | 39.2 | 0.0      | 37.6 | 0.0      | 38.3 ± 0.65          | 0.0 ± 0.0            | 4 |
| 15                   | 39.4 | 1.2      | 39.2 | 0.8      | 39.2 | 0.0      | 38.4 | 0.8      | 39.0 ± 0.47          | 0.7 ± 0.5            | 4 |
| 30                   | 39.5 | 1.2      | 38.8 | 0.4      | 39.2 | 0.0      | 38.0 | 0.5      | 38.9 ± 0.62          | 0.5 ± 0.5            | 4 |
| 45                   | 39.4 | 1.1      | 39.1 | 0.8      | 39.1 | -0.1     | 38.3 | 0.8      | 39.0 ± 0.44          | 0.6 ± 0.5            | 4 |
| 60                   | 39.1 | 0.8      | 39.0 | 0.7      | 39.1 | 0.0      | 38.4 | 0.8      | 38.9 ± 0.37          | 0.6 ± 0.4            | 4 |
| 75                   | 39.0 | 0.8      | 39.1 | 0.8      | 39.2 | 0.0      | 38.7 | 1.1      | 39.0 ± 0.24          | 0.7 ± 0.5            | 4 |
| 90                   | 39.0 | 0.7      | 39.2 | 0.8      | 39.4 | 0.2      | 38.6 | 1.0      | 39.0 ± 0.32          | 0.7 ± 0.4            | 4 |
| 105                  | 38.5 | 0.3      | 38.6 | 0.2      | 39.2 | 0.0      | 38.2 | 0.6      | 38.6 ± 0.39          | 0.3 ± 0.3            | 4 |
| 120                  | 38.7 | 0.5      | 38.3 | -0.1     | 39.0 | -0.2     | 38.1 | 0.5      | 38.5 ± 0.41          | 0.2 ± 0.4            | 4 |
| 135                  | 38.7 | 0.4      | 38.2 | -0.1     | 38.9 | -0.3     | 38.2 | 0.6      | 38.5 ± 0.35          | 0.2 ± 0.4            | 4 |
| 150                  | 38.5 | 0.2      | 38.2 | -0.1     | 38.9 | -0.3     | 38.2 | 0.6      | 38.5 ± 0.30          | 0.1 ± 0.4            | 4 |
| 165                  | 38.3 | 0.1      | 38.2 | -0.1     | 38.9 | -0.2     | 38.3 | 0.7      | 38.4 ± 0.33          | 0.1 ± 0.4            | 4 |
| 180                  | 38.2 | 0.0      | 38.2 | -0.2     | 38.8 | -0.4     | 38.5 | 0.9      | 38.4 ± 0.27          | 0.1 ± 0.6            | 4 |
| 195                  | 38.3 | 0.0      | 38.5 | 0.2      | 38.7 | -0.5     | 38.4 | 0.8      | 38.5 ± 0.18          | 0.1 ± 0.5            | 4 |
| 210                  | 38.3 | 0.0      | 38.4 | 0.0      | 38.8 | -0.3     | 38.0 | 0.4      | 38.4 ± 0.35          | 0.0 ± 0.3            | 4 |
| 225                  | 38.3 | 0.1      | 38.4 | 0.1      | 38.8 | -0.4     | 38.1 | 0.5      | 38.4 ± 0.31          | 0.1 ± 0.4            | 4 |
| 240                  | 38.3 | 0.1      | 38.3 | -0.1     | 39.0 | -0.2     | 38.1 | 0.6      | 38.4 ± 0.37          | 0.1 ± 0.3            | 4 |
| 270                  | 38.3 | 0.1      | 38.2 | -0.2     | 39.1 | -0.1     | 38.3 | 0.7      | 38.5 ± 0.42          | 0.1 ± 0.4            | 4 |
| 300                  | 38.2 | -0.1     | 38.3 | 0.0      | 38.7 | -0.5     | 37.9 | 0.3      | 38.3 ± 0.32          | -0.1 ± 0.3           | 4 |
| 330                  | 38.5 | 0.2      | 38.1 | -0.3     | 38.9 | -0.3     | 37.9 | 0.3      | 38.3 ± 0.44          | 0.0 ± 0.3            | 4 |
| 360                  | 37.8 | -0.4     | 38.0 | -0.3     | 39.0 | -0.2     | 38.1 | 0.5      | 38.2 ± 0.52          | -0.1 ± 0.4           | 4 |
| 390                  | 37.9 | -0.3     | 38.0 | -0.4     | 38.7 | -0.5     | 37.9 | 0.3      | 38.1 ± 0.40          | -0.2 ± 0.4           | 4 |
| 420                  | 38.4 | 0.1      | 38.0 | -0.3     | 38.8 | -0.4     | 37.7 | 0.1      | 38.2 ± 0.46          | -0.1 ± 0.3           | 4 |

CONFIDENTIAL

Appendix 1.3 – Group 3, Fexinidazole 300 mg/kg PO

Systolic blood pressure (mm Hg)

| Time from dose (min) | 2482 |          | 2539 |          | 2552 |          | 2057 |          | Absolute Mean ± S.D. | Δ from 0 Mean ± S.D. | N |
|----------------------|------|----------|------|----------|------|----------|------|----------|----------------------|----------------------|---|
|                      | Abs. | Δ from 0 | Abs. | Δ from 0 | Abs. | Δ from 0 | Abs. | Δ from 0 |                      |                      |   |
| -60                  | 159  | -4       | 151  | -8       | 149  | 5        | 141  | -3       | 150 ± 7.4            | -3 ± 5.8             | 4 |
| -50                  | 154  | -8       | 148  | -12      | 139  | -5       | 149  | 6        | 148 ± 6.6            | -5 ± 7.5             | 4 |
| -40                  | 170  | 7        | 194  | 34       | 148  | 4        | 142  | -1       | 164 ± 23.6           | 11 ± 15.9            | 4 |
| -30                  | 161  | -2       | 153  | -7       | 138  | -6       | 146  | 2        | 149 ± 9.9            | -3 ± 4.2             | 4 |
| -20                  | 157  | -6       | 142  | -18      | 144  | 1        | 145  | 1        | 147 ± 6.8            | -5 ± 9.1             | 4 |
| -10                  | 175  | 12       | 171  | 12       | 143  | 0        | 140  | -4       | 157 ± 18.3           | 5 ± 8.2              | 4 |
| 0                    | 163  | 0        | 160  | 0        | 143  | 0        | 144  | 0        | 152 ± 10.2           | 0 ± 0.0              | 4 |
| 15                   | 163  | 0        | 154  | -6       | 143  | -1       | 151  | 7        | 153 ± 8.4            | 0 ± 5.4              | 4 |
| 30                   | 163  | 0        | 124  | -35      | 144  | 1        | 149  | 5        | 145 ± 16.0           | -7 ± 18.9            | 4 |
| 45                   | 155  | -8       | 143  | -17      | 156  | 13       | 144  | 1        | 150 ± 6.8            | -3 ± 12.4            | 4 |
| 60                   | 151  | -11      | 156  | -4       | 151  | 7        | 152  | 8        | 153 ± 2.4            | 0 ± 9.3              | 4 |
| 75                   | 156  | -7       | 156  | -4       | 146  | 2        | 149  | 5        | 151 ± 5.0            | -1 ± 5.5             | 4 |
| 90                   | 153  | -9       | 160  | 0        | 151  | 8        | 151  | 7        | 154 ± 4.4            | 1 ± 7.8              | 4 |
| 105                  | 149  | -14      | 149  | -11      | 140  | -3       | 143  | -1       | 145 ± 4.2            | -7 ± 6.3             | 4 |
| 120                  | 143  | -19      | 137  | -23      | 137  | -7       | 138  | -6       | 139 ± 3.1            | -14 ± 8.5            | 4 |
| 135                  | 146  | -17      | 137  | -23      | 132  | -11      | 147  | 3        | 140 ± 6.9            | -12 ± 10.9           | 4 |
| 150                  | 147  | -15      | 144  | -16      | 150  | 7        | 135  | -9       | 144 ± 6.4            | -8 ± 10.6            | 4 |
| 165                  | 148  | -15      | 145  | -15      | 155  | 12       | 148  | 4        | 149 ± 4.4            | -3 ± 13.4            | 4 |
| 180                  | 154  | -9       | 149  | -11      | 149  | 5        | 150  | 6        | 150 ± 2.4            | -2 ± 8.9             | 4 |
| 195                  | 154  | -9       | 141  | -18      | 156  | 13       | 141  | -2       | 148 ± 7.9            | -4 ± 13.0            | 4 |
| 210                  | 157  | -6       | 144  | -16      | 158  | 14       | 143  | -1       | 150 ± 7.9            | -2 ± 12.5            | 4 |
| 225                  | 161  | -1       | 141  | -19      | 162  | 19       | 152  | 8        | 154 ± 9.8            | 2 ± 15.8             | 4 |
| 240                  | 154  | -8       | 155  | -5       | 156  | 12       | 140  | -4       | 151 ± 7.5            | -1 ± 9.1             | 4 |
| 270                  | 136  | -27      | 128  | -32      | 155  | 12       | 154  | 11       | 143 ± 13.5           | -9 ± 23.4            | 4 |
| 300                  | 145  | -18      | 124  | -36      | 161  | 18       | 148  | 4        | 144 ± 15.4           | -8 ± 23.7            | 4 |
| 330                  | 143  | -20      | 140  | -20      | 172  | 29       | 144  | 0        | 150 ± 15.2           | -3 ± 23.2            | 4 |
| 360                  | 145  | -17      | 138  | -22      | 157  | 14       | 154  | 10       | 149 ± 8.9            | -4 ± 18.6            | 4 |
| 390                  | 146  | -17      | 132  | -28      | 158  | 15       | 142  | -2       | 145 ± 10.9           | -8 ± 18.7            | 4 |
| 420                  | 146  | -17      | 122  | -38      | 145  | 2        | 139  | -5       | 138 ± 11.1           | -14 ± 17.4           | 4 |

CONFIDENTIAL

Appendix 1.3 – Group 3, Fexinidazole 300 mg/kg PO

Diastolic blood pressure (mm Hg)

| Time from dose (min) | 2482 |          | 2539 |          | 2552 |          | 2057 |          | Absolute Mean ± S.D. | Δ from 0 Mean ± S.D. | N |
|----------------------|------|----------|------|----------|------|----------|------|----------|----------------------|----------------------|---|
|                      | Abs. | Δ from 0 | Abs. | Δ from 0 | Abs. | Δ from 0 | Abs. | Δ from 0 |                      |                      |   |
| -60                  | 85   | -3       | 81   | -6       | 92   | -1       | 89   | -2       | 87 ± 4.7             | -3 ± 2.2             | 4 |
| -50                  | 83   | -5       | 81   | -6       | 86   | -7       | 93   | 2        | 86 ± 5.2             | -4 ± 3.9             | 4 |
| -40                  | 91   | 3        | 111  | 24       | 102  | 9        | 90   | -1       | 98 ± 9.7             | 8 ± 11.0             | 4 |
| -30                  | 87   | -2       | 84   | -3       | 85   | -8       | 96   | 4        | 88 ± 5.5             | -2 ± 5.0             | 4 |
| -20                  | 86   | -3       | 75   | -12      | 98   | 5        | 94   | 2        | 88 ± 10.0            | -2 ± 7.5             | 4 |
| -10                  | 99   | 11       | 91   | 4        | 94   | 2        | 87   | -4       | 93 ± 5.2             | 3 ± 6.2              | 4 |
| 0                    | 89   | 0        | 87   | 0        | 93   | 0        | 91   | 0        | 90 ± 2.6             | 0 ± 0.0              | 4 |
| 15                   | 106  | 17       | 87   | 0        | 96   | 3        | 101  | 10       | 98 ± 8.1             | 8 ± 7.7              | 4 |
| 30                   | 105  | 17       | 67   | -21      | 93   | 1        | 99   | 7        | 91 ± 17.0            | 1 ± 15.8             | 4 |
| 45                   | 93   | 5        | 77   | -10      | 95   | 2        | 94   | 2        | 90 ± 8.5             | 0 ± 6.6              | 4 |
| 60                   | 94   | 6        | 87   | 0        | 101  | 8        | 106  | 14       | 97 ± 8.2             | 7 ± 6.0              | 4 |
| 75                   | 95   | 6        | 86   | -1       | 100  | 7        | 102  | 11       | 96 ± 6.9             | 6 ± 4.7              | 4 |
| 90                   | 89   | 0        | 91   | 3        | 89   | -4       | 100  | 9        | 92 ± 5.4             | 2 ± 5.2              | 4 |
| 105                  | 87   | -2       | 87   | -1       | 91   | -2       | 98   | 6        | 90 ± 5.1             | 0 ± 3.7              | 4 |
| 120                  | 84   | -5       | 76   | -11      | 85   | -8       | 96   | 5        | 85 ± 8.2             | -5 ± 6.7             | 4 |
| 135                  | 85   | -4       | 78   | -9       | 90   | -2       | 95   | 4        | 87 ± 7.7             | -3 ± 5.5             | 4 |
| 150                  | 84   | -5       | 84   | -3       | 95   | 3        | 87   | -4       | 88 ± 5.5             | -2 ± 3.5             | 4 |
| 165                  | 86   | -3       | 83   | -4       | 108  | 15       | 100  | 9        | 94 ± 11.7            | 4 ± 9.2              | 4 |
| 180                  | 83   | -5       | 83   | -4       | 96   | 3        | 98   | 7        | 90 ± 8.2             | 0 ± 5.9              | 4 |
| 195                  | 87   | -1       | 71   | -16      | 99   | 7        | 91   | 0        | 87 ± 11.8            | -3 ± 9.4             | 4 |
| 210                  | 90   | 1        | 73   | -14      | 107  | 14       | 92   | 1        | 90 ± 14.0            | 0 ± 11.7             | 4 |
| 225                  | 85   | -3       | 72   | -15      | 110  | 18       | 96   | 4        | 91 ± 16.1            | 1 ± 13.6             | 4 |
| 240                  | 83   | -6       | 82   | -5       | 108  | 16       | 89   | -2       | 91 ± 12.2            | 1 ± 10.1             | 4 |
| 270                  | 82   | -6       | 73   | -14      | 96   | 3        | 111  | 20       | 91 ± 16.7            | 1 ± 14.6             | 4 |
| 300                  | 89   | 1        | 68   | -19      | 113  | 20       | 101  | 10       | 93 ± 19.0            | 3 ± 16.5             | 4 |
| 330                  | 87   | -2       | 84   | -3       | 122  | 29       | 98   | 7        | 98 ± 17.2            | 8 ± 14.9             | 4 |
| 360                  | 87   | -1       | 81   | -6       | 105  | 12       | 101  | 10       | 94 ± 11.2            | 4 ± 8.6              | 4 |
| 390                  | 86   | -3       | 78   | -9       | 109  | 16       | 99   | 8        | 93 ± 13.7            | 3 ± 11.2             | 4 |
| 420                  | 95   | 7        | 74   | -14      | 101  | 8        | 97   | 6        | 92 ± 12.5            | 2 ± 10.4             | 4 |

CONFIDENTIAL

Appendix 1.3 – Group 3, Fexinidazole 300 mg/kg PO

Mean blood pressure (mm Hg)

| Time from dose (min) | 2482 |          | 2539 |          | 2552 |          | 2057 |          | Absolute Mean ± S.D. | Δ from 0 Mean ± S.D. | N |
|----------------------|------|----------|------|----------|------|----------|------|----------|----------------------|----------------------|---|
|                      | Abs. | Δ from 0 | Abs. | Δ from 0 | Abs. | Δ from 0 | Abs. | Δ from 0 |                      |                      |   |
| -60                  | 113  | -2       | 104  | -7       | 114  | 1        | 105  | -3       | 109 ± 5.1            | -3 ± 3.1             | 4 |
| -50                  | 110  | -6       | 102  | -9       | 107  | -6       | 112  | 3        | 107 ± 4.3            | -4 ± 5.3             | 4 |
| -40                  | 119  | 4        | 139  | 28       | 122  | 9        | 108  | -1       | 122 ± 12.8           | 10 ± 12.5            | 4 |
| -30                  | 113  | -2       | 105  | -6       | 106  | -7       | 112  | 4        | 109 ± 4.4            | -3 ± 5.1             | 4 |
| -20                  | 111  | -4       | 96   | -14      | 116  | 3        | 108  | 0        | 108 ± 8.2            | -4 ± 7.4             | 4 |
| -10                  | 125  | 10       | 118  | 8        | 113  | 0        | 105  | -4       | 115 ± 8.5            | 3 ± 6.2              | 4 |
| 0                    | 115  | 0        | 111  | 0        | 113  | 0        | 108  | 0        | 112 ± 3.0            | 0 ± 0.0              | 4 |
| 15                   | 128  | 13       | 111  | 0        | 114  | 1        | 117  | 9        | 117 ± 7.5            | 6 ± 6.2              | 4 |
| 30                   | 127  | 12       | 86   | -25      | 114  | 1        | 116  | 8        | 111 ± 17.6           | -1 ± 16.5            | 4 |
| 45                   | 116  | 1        | 101  | -9       | 119  | 7        | 111  | 3        | 112 ± 7.9            | 0 ± 6.8              | 4 |
| 60                   | 117  | 2        | 112  | 2        | 121  | 8        | 121  | 13       | 118 ± 4.2            | 6 ± 5.6              | 4 |
| 75                   | 119  | 4        | 112  | 1        | 119  | 6        | 119  | 10       | 117 ± 3.5            | 5 ± 4.0              | 4 |
| 90                   | 112  | -3       | 114  | 4        | 112  | 0        | 117  | 9        | 114 ± 2.2            | 2 ± 5.1              | 4 |
| 105                  | 109  | -6       | 110  | 0        | 111  | -2       | 113  | 5        | 111 ± 1.5            | -1 ± 4.3             | 4 |
| 120                  | 104  | -11      | 97   | -14      | 105  | -8       | 111  | 2        | 104 ± 5.6            | -8 ± 7.1             | 4 |
| 135                  | 106  | -9       | 99   | -12      | 107  | -6       | 112  | 3        | 106 ± 5.4            | -6 ± 6.6             | 4 |
| 150                  | 107  | -8       | 103  | -7       | 118  | 5        | 103  | -6       | 108 ± 6.9            | -4 ± 5.9             | 4 |
| 165                  | 107  | -8       | 104  | -7       | 127  | 14       | 116  | 8        | 113 ± 10.5           | 2 ± 11.1             | 4 |
| 180                  | 108  | -7       | 104  | -7       | 117  | 5        | 116  | 8        | 111 ± 6.4            | 0 ± 7.5              | 4 |
| 195                  | 111  | -5       | 94   | -16      | 123  | 10       | 108  | 0        | 109 ± 11.6           | -3 ± 10.7            | 4 |
| 210                  | 115  | 0        | 95   | -16      | 126  | 13       | 110  | 2        | 112 ± 12.9           | 0 ± 11.9             | 4 |
| 225                  | 112  | -3       | 94   | -17      | 132  | 19       | 115  | 7        | 113 ± 15.6           | 2 ± 15.1             | 4 |
| 240                  | 108  | -8       | 107  | -4       | 127  | 14       | 108  | 0        | 112 ± 9.9            | 1 ± 9.6              | 4 |
| 270                  | 102  | -13      | 93   | -18      | 119  | 6        | 127  | 18       | 110 ± 15.5           | -2 ± 16.9            | 4 |
| 300                  | 109  | -6       | 86   | -24      | 133  | 20       | 116  | 8        | 111 ± 19.2           | -1 ± 18.9            | 4 |
| 330                  | 108  | -7       | 103  | -8       | 142  | 29       | 113  | 5        | 117 ± 17.7           | 5 ± 17.4             | 4 |
| 360                  | 109  | -6       | 101  | -10      | 124  | 11       | 118  | 10       | 113 ± 10.2           | 1 ± 10.8             | 4 |
| 390                  | 109  | -6       | 97   | -13      | 127  | 14       | 114  | 5        | 112 ± 12.5           | 0 ± 12.4             | 4 |
| 420                  | 113  | -2       | 90   | -21      | 119  | 6        | 112  | 4        | 109 ± 12.7           | -3 ± 12.1            | 4 |

CONFIDENTIAL

Appendix 1.3 – Group 3, Fexinidazole 300 mg/kg PO

Heart rate (beats/min)

| Time from dose (min) | 2482 |          | 2539 |          | 2552 |          | 2057 |          | Absolute Mean ± S.D. | Δ from 0 Mean ± S.D. | N |
|----------------------|------|----------|------|----------|------|----------|------|----------|----------------------|----------------------|---|
|                      | Abs. | Δ from 0 | Abs. | Δ from 0 | Abs. | Δ from 0 | Abs. | Δ from 0 |                      |                      |   |
| -60                  | 52   | -10      | 56   | -13      | 115  | 13       | 84   | 5        | 77 ± 29.1            | -1 ± 12.4            | 4 |
| -50                  | 62   | 0        | 65   | -5       | 76   | -26      | 63   | -16      | 67 ± 6.4             | -12 ± 11.8           | 4 |
| -40                  | 68   | 6        | 72   | 2        | 117  | 15       | 63   | -15      | 80 ± 25.1            | 2 ± 12.7             | 4 |
| -30                  | 55   | -7       | 54   | -15      | 103  | 0        | 86   | 7        | 75 ± 23.8            | -4 ± 9.6             | 4 |
| -20                  | 55   | -7       | 76   | 6        | 105  | 3        | 79   | 0        | 79 ± 20.6            | 1 ± 5.7              | 4 |
| -10                  | 81   | 18       | 95   | 25       | 98   | -4       | 97   | 18       | 93 ± 8.2             | 14 ± 12.9            | 4 |
| 0                    | 62   | 0        | 70   | 0        | 102  | 0        | 79   | 0        | 78 ± 17.4            | 0 ± 0.0              | 4 |
| 15                   | 103  | 40       | 104  | 34       | 105  | 3        | 76   | -3       | 97 ± 14.1            | 19 ± 21.9            | 4 |
| 30                   | 115  | 52       | 82   | 12       | 111  | 9        | 97   | 19       | 101 ± 15.0           | 23 ± 20.1            | 4 |
| 45                   | 87   | 25       | 99   | 30       | 114  | 11       | 92   | 13       | 98 ± 11.5            | 20 ± 9.0             | 4 |
| 60                   | 100  | 38       | 124  | 55       | 125  | 23       | 112  | 33       | 115 ± 11.7           | 37 ± 13.3            | 4 |
| 75                   | 98   | 36       | 122  | 52       | 125  | 23       | 128  | 50       | 118 ± 13.7           | 40 ± 13.5            | 4 |
| 90                   | 89   | 26       | 103  | 33       | 116  | 14       | 84   | 6        | 98 ± 14.4            | 20 ± 12.4            | 4 |
| 105                  | 80   | 17       | 117  | 47       | 116  | 13       | 76   | -3       | 97 ± 22.3            | 19 ± 21.0            | 4 |
| 120                  | 69   | 7        | 88   | 18       | 109  | 6        | 100  | 21       | 92 ± 17.0            | 13 ± 7.7             | 4 |
| 135                  | 63   | 1        | 80   | 10       | 101  | -2       | 95   | 16       | 85 ± 16.8            | 6 ± 8.4              | 4 |
| 150                  | 68   | 5        | 99   | 29       | 105  | 2        | 73   | -6       | 86 ± 18.4            | 8 ± 14.9             | 4 |
| 165                  | 76   | 14       | 82   | 13       | 117  | 14       | 92   | 13       | 92 ± 17.8            | 14 ± 0.7             | 4 |
| 180                  | 79   | 17       | 89   | 19       | 96   | -7       | 69   | -10      | 83 ± 11.7            | 5 ± 15.2             | 4 |
| 195                  | 62   | -1       | 66   | -4       | 95   | -8       | 78   | -1       | 75 ± 14.9            | -3 ± 3.3             | 4 |
| 210                  | 87   | 25       | 64   | -6       | 117  | 15       | 90   | 11       | 90 ± 21.8            | 11 ± 12.9            | 4 |
| 225                  | 82   | 20       | 59   | -10      | 122  | 19       | 98   | 19       | 90 ± 26.3            | 12 ± 15.0            | 4 |
| 240                  | 66   | 4        | 99   | 29       | 116  | 13       | 113  | 34       | 99 ± 23.0            | 20 ± 14.2            | 4 |
| 270                  | 62   | 0        | 86   | 16       | 111  | 9        | 89   | 10       | 87 ± 20.2            | 9 ± 6.8              | 4 |
| 300                  | 71   | 8        | 70   | 0        | 147  | 44       | 98   | 20       | 96 ± 36.1            | 18 ± 19.3            | 4 |
| 330                  | 68   | 5        | 88   | 19       | 134  | 31       | 91   | 12       | 95 ± 27.7            | 17 ± 11.0            | 4 |
| 360                  | 64   | 2        | 73   | 4        | 114  | 12       | 92   | 13       | 86 ± 21.9            | 8 ± 5.5              | 4 |
| 390                  | 66   | 4        | 96   | 27       | 124  | 21       | 105  | 26       | 98 ± 24.0            | 19 ± 10.7            | 4 |
| 420                  | 74   | 12       | 104  | 35       | 139  | 37       | 121  | 43       | 110 ± 27.7           | 31 ± 13.5            | 4 |

CONFIDENTIAL

Appendix 1.3 – Group 3, Fexinidazole 300 mg/kg PO

Uncorrected QT interval (msec)

| Time from dose (min) | 2482 |          | 2539 |          | 2552 |          | 2057 |          | Absolute Mean ± S.D. | Δ from 0 Mean ± S.D. | N |
|----------------------|------|----------|------|----------|------|----------|------|----------|----------------------|----------------------|---|
|                      | Abs. | Δ from 0 | Abs. | Δ from 0 | Abs. | Δ from 0 | Abs. | Δ from 0 |                      |                      |   |
| -60                  | 238  | 18       | 222  | 17       | 195  | -6       | 209  | 1        | 216 ± 18.3           | 7 ± 11.9             | 4 |
| -50                  | 230  | 10       | 198  | -8       | 206  | 4        | 209  | 1        | 211 ± 13.9           | 2 ± 7.2              | 4 |
| -40                  | 198  | -23      | 195  | -11      | 202  | 1        | 206  | -2       | 200 ± 5.2            | -9 ± 10.7            | 4 |
| -30                  | 228  | 7        | 219  | 14       | 204  | 2        | 203  | -5       | 213 ± 12.1           | 5 ± 8.0              | 4 |
| -20                  | 224  | 4        | 210  | 5        | 197  | -5       | 217  | 9        | 212 ± 11.7           | 3 ± 5.6              | 4 |
| -10                  | 205  | -16      | 189  | -17      | 205  | 4        | 205  | -3       | 201 ± 8.2            | -8 ± 9.9             | 4 |
| 0                    | 220  | 0        | 205  | 0        | 202  | 0        | 208  | 0        | 209 ± 8.2            | 0 ± 0.0              | 4 |
| 15                   | 186  | -35      | 177  | -29      | 192  | -9       | 200  | -8       | 189 ± 9.9            | -20 ± 13.5           | 4 |
| 30                   | 184  | -37      | 200  | -5       | 191  | -11      | 207  | -1       | 195 ± 10.2           | -14 ± 16.1           | 4 |
| 45                   | 201  | -19      | 176  | -29      | 186  | -16      | 195  | -13      | 190 ± 11.0           | -19 ± 7.1            | 4 |
| 60                   | 197  | -24      | 168  | -37      | 182  | -20      | 189  | -19      | 184 ± 12.1           | -25 ± 8.3            | 4 |
| 75                   | 197  | -23      | 179  | -26      | 179  | -22      | 193  | -15      | 187 ± 9.3            | -22 ± 4.7            | 4 |
| 90                   | 210  | -11      | 199  | -7       | 167  | -34      | 196  | -12      | 193 ± 18.0           | -16 ± 12.3           | 4 |
| 105                  | 215  | -6       | 187  | -18      | 181  | -20      | 200  | -8       | 196 ± 14.8           | -13 ± 7.1            | 4 |
| 120                  | 226  | 6        | 210  | 5        | 186  | -15      | 194  | -14      | 204 ± 17.7           | -5 ± 11.4            | 4 |
| 135                  | 232  | 11       | 213  | 8        | 200  | -2       | 205  | -3       | 212 ± 14.0           | 4 ± 6.9              | 4 |
| 150                  | 234  | 13       | 213  | 8        | 203  | 1        | 228  | 20       | 219 ± 14.1           | 11 ± 8.1             | 4 |
| 165                  | 233  | 13       | 209  | 4        | 187  | -14      | 207  | -1       | 209 ± 18.9           | 0 ± 11.4             | 4 |
| 180                  | 216  | -4       | 214  | 9        | 191  | -10      | 211  | 3        | 208 ± 11.3           | -1 ± 8.4             | 4 |
| 195                  | 232  | 12       | 210  | 5        | 199  | -3       | 214  | 6        | 214 ± 13.9           | 5 ± 6.0              | 4 |
| 210                  | 224  | 3        | 206  | 1        | 189  | -13      | 211  | 3        | 207 ± 14.7           | -2 ± 7.7             | 4 |
| 225                  | 235  | 14       | 217  | 12       | 192  | -10      | 190  | -18      | 208 ± 21.6           | -1 ± 16.1            | 4 |
| 240                  | 221  | 1        | 200  | -5       | 188  | -14      | 190  | -18      | 200 ± 15.2           | -9 ± 8.3             | 4 |
| 270                  | 245  | 24       | 213  | 8        | 189  | -13      | 189  | -19      | 209 ± 26.4           | 0 ± 19.7             | 4 |
| 300                  | 248  | 27       | 223  | 18       | 182  | -20      | 228  | 20       | 220 ± 27.6           | 11 ± 21.0            | 4 |
| 330                  | 247  | 27       | 225  | 20       | 180  | -22      | 232  | 24       | 221 ± 29.0           | 12 ± 22.8            | 4 |
| 360                  | 253  | 33       | 216  | 11       | 180  | -21      | 202  | -6       | 213 ± 30.7           | 4 ± 23.2             | 4 |
| 390                  | 247  | 27       | 203  | -2       | 167  | -35      | 219  | 11       | 209 ± 33.6           | 0 ± 26.2             | 4 |
| 420                  | 242  | 22       | 194  | -12      | 166  | -35      | 187  | -21      | 198 ± 32.2           | -11 ± 24.2           | 4 |



CONFIDENTIAL

Appendix 1.3 – Group 3, Fexinidazole 300 mg/kg PO

Corrected QT interval (covariate analysis, QTca) (msec)

| Time from dose (min) | 2482 |          | 2539 |          | 2552 |          | 2057 |          | Absolute Mean ± S.D. | Δ from 0 Mean ± S.D. | N |
|----------------------|------|----------|------|----------|------|----------|------|----------|----------------------|----------------------|---|
|                      | Abs. | Δ from 0 | Abs. | Δ from 0 | Abs. | Δ from 0 | Abs. | Δ from 0 |                      |                      |   |
| -60                  | 205  | 8        | 193  | 9        | 200  | 1        | 197  | 3        | 199 ± 5.1            | 5 ± 4.0              | 4 |
| -50                  | 206  | 9        | 173  | -11      | 194  | -5       | 188  | -5       | 190 ± 13.6           | -3 ± 8.6             | 4 |
| -40                  | 183  | -13      | 177  | -7       | 208  | 9        | 188  | -5       | 189 ± 13.5           | -4 ± 9.3             | 4 |
| -30                  | 198  | 1        | 185  | 2        | 197  | -3       | 196  | 2        | 194 ± 5.8            | 1 ± 2.2              | 4 |
| -20                  | 195  | -1       | 191  | 7        | 196  | -3       | 196  | 3        | 195 ± 2.8            | 1 ± 4.4              | 4 |
| -10                  | 192  | -4       | 183  | 0        | 201  | 2        | 197  | 3        | 194 ± 7.6            | 0 ± 3.2              | 4 |
| 0                    | 197  | 0        | 184  | 0        | 199  | 0        | 194  | 0        | 193 ± 6.8            | 0 ± 0.0              | 4 |
| 15                   | 186  | -11      | 178  | -6       | 191  | -8       | 186  | -8       | 185 ± 5.4            | -8 ± 2.1             | 4 |
| 30                   | 186  | -10      | 189  | 5        | 194  | -6       | 202  | 8        | 193 ± 6.9            | -1 ± 8.6             | 4 |
| 45                   | 194  | -2       | 176  | -8       | 190  | -10      | 189  | -5       | 187 ± 7.9            | -6 ± 3.3             | 4 |
| 60                   | 195  | -1       | 177  | -7       | 189  | -10      | 189  | -4       | 188 ± 7.6            | -6 ± 3.8             | 4 |
| 75                   | 196  | -1       | 187  | 3        | 188  | -12      | 201  | 7        | 193 ± 7.0            | -1 ± 8.3             | 4 |
| 90                   | 202  | 6        | 197  | 14       | 172  | -27      | 185  | -8       | 189 ± 13.5           | -4 ± 18.0            | 4 |
| 105                  | 202  | 5        | 193  | 9        | 186  | -13      | 186  | -7       | 192 ± 7.4            | -2 ± 10.5            | 4 |
| 120                  | 205  | 8        | 202  | 18       | 188  | -11      | 191  | -3       | 197 ± 8.2            | 3 ± 12.9             | 4 |
| 135                  | 205  | 9        | 200  | 16       | 197  | -2       | 193  | -1       | 199 ± 5.1            | 5 ± 8.5              | 4 |
| 150                  | 211  | 15       | 206  | 23       | 200  | 0        | 210  | 16       | 207 ± 5.2            | 13 ± 9.5             | 4 |
| 165                  | 213  | 17       | 198  | 14       | 190  | -9       | 200  | 6        | 200 ± 9.7            | 7 ± 11.8             | 4 |
| 180                  | 203  | 6        | 200  | 17       | 187  | -13      | 193  | -1       | 196 ± 7.4            | 2 ± 12.4             | 4 |
| 195                  | 207  | 10       | 183  | -1       | 195  | -4       | 203  | 9        | 197 ± 10.6           | 4 ± 7.3              | 4 |
| 210                  | 216  | 19       | 192  | 8        | 192  | -7       | 209  | 15       | 202 ± 11.9           | 9 ± 11.6             | 4 |
| 225                  | 223  | 27       | 196  | 12       | 201  | 1        | 186  | -8       | 201 ± 15.9           | 8 ± 15.0             | 4 |
| 240                  | 200  | 3        | 195  | 11       | 193  | -6       | 195  | 1        | 196 ± 2.7            | 2 ± 7.0              | 4 |
| 270                  | 215  | 18       | 203  | 19       | 192  | -7       | 183  | -11      | 198 ± 14.0           | 5 ± 16.3             | 4 |
| 300                  | 225  | 29       | 202  | 19       | 198  | -2       | 221  | 27       | 212 ± 13.6           | 18 ± 14.0            | 4 |
| 330                  | 225  | 28       | 217  | 33       | 191  | -9       | 222  | 28       | 214 ± 15.5           | 20 ± 19.3            | 4 |
| 360                  | 228  | 31       | 201  | 17       | 183  | -16      | 195  | 2        | 202 ± 18.7           | 8 ± 20.4             | 4 |
| 390                  | 226  | 29       | 199  | 15       | 174  | -26      | 218  | 25       | 204 ± 23.2           | 11 ± 25.0            | 4 |
| 420                  | 222  | 25       | 192  | 8        | 180  | -20      | 194  | 1        | 197 ± 17.9           | 4 ± 18.8             | 4 |

CONFIDENTIAL

Appendix 1.3 – Group 3, Fexinidazole 300 mg/kg PO

PR interval (msec)

| Time from dose (min) | 2482 |          | 2539 |          | 2552 |          | 2057 |          | Absolute Mean ± S.D. | Δ from 0 Mean ± S.D. | N |
|----------------------|------|----------|------|----------|------|----------|------|----------|----------------------|----------------------|---|
|                      | Abs. | Δ from 0 | Abs. | Δ from 0 | Abs. | Δ from 0 | Abs. | Δ from 0 |                      |                      |   |
| -60                  | 109  | 2        | 104  | 3        | 92   | 3        | 94   | 4        | 100 ± 8.0            | 3 ± 0.8              | 4 |
| -50                  | 108  | 1        | 101  | 1        | 86   | -3       | 90   | -1       | 96 ± 10.3            | 0 ± 1.7              | 4 |
| -40                  | 108  | 1        | 98   | -2       | 89   | 1        | 90   | -1       | 96 ± 8.9             | 0 ± 1.3              | 4 |
| -30                  | 108  | 1        | 100  | 0        | 89   | 0        | 87   | -4       | 96 ± 10.2            | -1 ± 2.3             | 4 |
| -20                  | 107  | 0        | 101  | 1        | 88   | -1       | 91   | 1        | 97 ± 8.8             | 0 ± 0.9              | 4 |
| -10                  | 103  | -4       | 97   | -3       | 87   | -1       | 92   | 1        | 95 ± 6.7             | -2 ± 2.4             | 4 |
| 0                    | 107  | 0        | 100  | 0        | 88   | 0        | 91   | 0        | 97 ± 8.7             | 0 ± 0.0              | 4 |
| 15                   | 91   | -16      | 96   | -5       | 89   | 1        | 86   | -5       | 90 ± 4.0             | -6 ± 7.3             | 4 |
| 30                   | 89   | -18      | 98   | -2       | 90   | 2        | 86   | -4       | 91 ± 5.2             | -6 ± 8.4             | 4 |
| 45                   | 95   | -12      | 96   | -4       | 86   | -3       | 87   | -3       | 91 ± 5.4             | -5 ± 4.3             | 4 |
| 60                   | 89   | -18      | 89   | -12      | 87   | -1       | 84   | -7       | 87 ± 2.4             | -9 ± 7.2             | 4 |
| 75                   | 94   | -13      | 89   | -11      | 87   | -1       | 84   | -6       | 89 ± 4.0             | -8 ± 5.4             | 4 |
| 90                   | 92   | -15      | 91   | -9       | 88   | 0        | 89   | -1       | 90 ± 2.1             | -6 ± 6.7             | 4 |
| 105                  | 99   | -8       | 97   | -3       | 90   | 2        | 92   | 2        | 95 ± 4.3             | -2 ± 4.6             | 4 |
| 120                  | 103  | -4       | 107  | 7        | 92   | 3        | 95   | 4        | 99 ± 7.4             | 3 ± 4.7              | 4 |
| 135                  | 107  | 0        | 115  | 14       | 97   | 9        | 89   | -2       | 102 ± 11.2           | 5 ± 7.6              | 4 |
| 150                  | 107  | 0        | 108  | 8        | 97   | 8        | 101  | 11       | 103 ± 5.4            | 7 ± 4.6              | 4 |
| 165                  | 108  | 1        | 98   | -2       | 92   | 4        | 94   | 4        | 98 ± 7.0             | 2 ± 3.0              | 4 |
| 180                  | 101  | -6       | 99   | -1       | 96   | 7        | 93   | 3        | 97 ± 3.6             | 1 ± 5.6              | 4 |
| 195                  | 105  | -2       | 102  | 1        | 96   | 8        | 95   | 4        | 99 ± 4.8             | 3 ± 4.1              | 4 |
| 210                  | 102  | -5       | 96   | -4       | 91   | 3        | 89   | -2       | 95 ± 6.1             | -2 ± 3.4             | 4 |
| 225                  | 100  | -7       | 99   | -2       | 95   | 6        | 86   | -5       | 95 ± 6.5             | -2 ± 5.8             | 4 |
| 240                  | 101  | -6       | 93   | -7       | 92   | 4        | 89   | -2       | 94 ± 5.1             | -3 ± 5.1             | 4 |
| 270                  | 114  | 7        | 107  | 7        | 92   | 4        | 95   | 4        | 102 ± 10.5           | 5 ± 1.8              | 4 |
| 300                  | 109  | 2        | 104  | 4        | 87   | -1       | 94   | 3        | 98 ± 9.8             | 2 ± 2.2              | 4 |
| 330                  | 109  | 2        | 101  | 0        | 90   | 2        | 83   | -7       | 96 ± 11.4            | -1 ± 4.4             | 4 |
| 360                  | 113  | 6        | 98   | -3       | 84   | -5       | 86   | -5       | 95 ± 13.3            | -2 ± 4.9             | 4 |
| 390                  | 106  | -1       | 91   | -9       | 86   | -3       | 81   | -10      | 91 ± 10.8            | -6 ± 4.3             | 4 |
| 420                  | 103  | -4       | 88   | -12      | 89   | 1        | 80   | -11      | 90 ± 9.7             | -7 ± 6.2             | 4 |

CONFIDENTIAL

Appendix 1.3 – Group 3, Fexinidazole 300 mg/kg PO

QRS interval (msec)

| Time from dose (min) | 2482 |          | 2539 |          | 2552 |          | 2057 |          | Absolute Mean ± S.D. | Δ from 0 Mean ± S.D. | N |
|----------------------|------|----------|------|----------|------|----------|------|----------|----------------------|----------------------|---|
|                      | Abs. | Δ from 0 | Abs. | Δ from 0 | Abs. | Δ from 0 | Abs. | Δ from 0 |                      |                      |   |
| -60                  | 40   | 0        | 40   | -2       | 38   | -1       | 41   | 1        | 40 ± 1.2             | 0 ± 1.0              | 4 |
| -50                  | 40   | 0        | 44   | 2        | 39   | 0        | 40   | 0        | 41 ± 2.0             | 0 ± 1.0              | 4 |
| -40                  | 40   | -1       | 44   | 2        | 39   | 0        | 41   | 1        | 41 ± 2.2             | 0 ± 1.1              | 4 |
| -30                  | 39   | -1       | 39   | -2       | 38   | 0        | 40   | -1       | 39 ± 0.5             | -1 ± 0.8             | 4 |
| -20                  | 43   | 3        | 41   | -1       | 39   | 0        | 41   | 0        | 41 ± 1.7             | 1 ± 1.7              | 4 |
| -10                  | 39   | -2       | 43   | 1        | 40   | 1        | 41   | 0        | 41 ± 1.8             | 0 ± 1.3              | 4 |
| 0                    | 40   | 0        | 42   | 0        | 39   | 0        | 41   | 0        | 40 ± 1.2             | 0 ± 0.0              | 4 |
| 15                   | 38   | -2       | 45   | 3        | 38   | -1       | 42   | 1        | 41 ± 3.1             | 0 ± 2.1              | 4 |
| 30                   | 39   | -1       | 47   | 5        | 39   | 0        | 40   | 0        | 41 ± 3.8             | 1 ± 2.8              | 4 |
| 45                   | 41   | 0        | 43   | 1        | 38   | -1       | 41   | 0        | 41 ± 1.9             | 0 ± 0.8              | 4 |
| 60                   | 40   | 0        | 43   | 1        | 39   | 0        | 42   | 1        | 41 ± 2.0             | 1 ± 1.0              | 4 |
| 75                   | 40   | -1       | 43   | 1        | 34   | -5       | 41   | 1        | 39 ± 4.1             | -1 ± 2.9             | 4 |
| 90                   | 40   | 0        | 46   | 4        | 36   | -3       | 40   | -1       | 41 ± 4.1             | 0 ± 2.9              | 4 |
| 105                  | 41   | 0        | 46   | 5        | 36   | -3       | 40   | -1       | 41 ± 4.4             | 0 ± 3.3              | 4 |
| 120                  | 40   | -1       | 45   | 3        | 36   | -2       | 39   | -1       | 40 ± 3.4             | 0 ± 2.2              | 4 |
| 135                  | 41   | 0        | 42   | 0        | 36   | -3       | 41   | 1        | 40 ± 2.7             | 0 ± 1.7              | 4 |
| 150                  | 42   | 2        | 44   | 2        | 39   | 0        | 41   | 1        | 42 ± 2.3             | 1 ± 1.2              | 4 |
| 165                  | 42   | 2        | 44   | 2        | 35   | -4       | 42   | 1        | 41 ± 3.8             | 0 ± 2.7              | 4 |
| 180                  | 39   | -1       | 44   | 2        | 36   | -3       | 40   | 0        | 40 ± 3.1             | -1 ± 1.9             | 4 |
| 195                  | 41   | 1        | 39   | -3       | 39   | 0        | 43   | 2        | 40 ± 1.6             | 0 ± 1.9              | 4 |
| 210                  | 39   | -1       | 40   | -2       | 40   | 1        | 41   | 0        | 40 ± 0.6             | -1 ± 1.4             | 4 |
| 225                  | 41   | 1        | 42   | 0        | 41   | 2        | 39   | -1       | 41 ± 1.0             | 0 ± 1.3              | 4 |
| 240                  | 39   | -1       | 43   | 1        | 37   | -2       | 41   | 0        | 40 ± 2.7             | 0 ± 1.6              | 4 |
| 270                  | 49   | 9        | 41   | 0        | 38   | -1       | 44   | 4        | 43 ± 4.8             | 3 ± 4.5              | 4 |
| 300                  | 64   | 24       | 41   | -1       | 36   | -3       | 44   | 3        | 46 ± 12.6            | 6 ± 12.5             | 4 |
| 330                  | 62   | 21       | 42   | 0        | 36   | -3       | 44   | 4        | 46 ± 10.9            | 6 ± 10.7             | 4 |
| 360                  | 56   | 15       | 42   | 0        | 35   | -4       | 44   | 3        | 44 ± 8.5             | 4 ± 8.2              | 4 |
| 390                  | 63   | 23       | 43   | 2        | 34   | -5       | 43   | 2        | 46 ± 12.4            | 5 ± 12.2             | 4 |
| 420                  | 64   | 24       | 43   | 1        | 34   | -5       | 40   | 0        | 45 ± 12.9            | 5 ± 12.7             | 4 |

CONFIDENTIAL

Appendix 1.3 – Group 3, Fexinidazole 300 mg/kg PO

RR interval (msec)

| Time from dose (min) | 2482 |          | 2539 |          | 2552 |          | 2057 |          | Absolute Mean ± S.D. | Δ from 0 Mean ± S.D. | N |
|----------------------|------|----------|------|----------|------|----------|------|----------|----------------------|----------------------|---|
|                      | Abs. | Δ from 0 | Abs. | Δ from 0 | Abs. | Δ from 0 | Abs. | Δ from 0 |                      |                      |   |
| -60                  | 1157 | 163      | 1112 | 126      | 541  | -92      | 766  | -56      | 894 ± 292.9          | 35 ± 128.1           | 4 |
| -50                  | 973  | -21      | 1065 | 80       | 767  | 134      | 940  | 118      | 937 ± 124.6          | 78 ± 69.5            | 4 |
| -40                  | 836  | -157     | 901  | -84      | 528  | -105     | 892  | 70       | 789 ± 176.5          | -69 ± 97.7           | 4 |
| -30                  | 1104 | 110      | 1242 | 257      | 703  | 69       | 704  | -119     | 938 ± 276.9          | 79 ± 154.5           | 4 |
| -20                  | 1102 | 108      | 914  | -72      | 607  | -27      | 922  | 100      | 886 ± 205.5          | 27 ± 90.3            | 4 |
| -10                  | 790  | -203     | 677  | -308     | 655  | 21       | 709  | -114     | 708 ± 59.3           | -151 ± 139.5         | 4 |
| 0                    | 994  | 0        | 985  | 0        | 633  | 0        | 822  | 0        | 859 ± 169.6          | 0 ± 0.0              | 4 |
| 15                   | 600  | -394     | 579  | -406     | 617  | -17      | 823  | 1        | 655 ± 113.4          | -204 ± 226.7         | 4 |
| 30                   | 562  | -432     | 773  | -212     | 559  | -74      | 665  | -157     | 640 ± 101.7          | -219 ± 153.0         | 4 |
| 45                   | 698  | -295     | 599  | -386     | 546  | -88      | 688  | -134     | 633 ± 73.0           | -226 ± 138.8         | 4 |
| 60                   | 624  | -370     | 481  | -504     | 506  | -127     | 598  | -224     | 552 ± 69.1           | -306 ± 165.2         | 4 |
| 75                   | 618  | -376     | 506  | -479     | 491  | -143     | 501  | -321     | 529 ± 59.7           | -330 ± 140.8         | 4 |
| 90                   | 699  | -295     | 616  | -369     | 531  | -102     | 764  | -58      | 652 ± 100.9          | -206 ± 149.7         | 4 |
| 105                  | 784  | -210     | 531  | -454     | 535  | -99      | 812  | -10      | 665 ± 153.5          | -193 ± 192.2         | 4 |
| 120                  | 922  | -72      | 707  | -278     | 569  | -64      | 650  | -172     | 712 ± 150.7          | -146 ± 100.3         | 4 |
| 135                  | 1020 | 27       | 795  | -191     | 632  | -1       | 786  | -36      | 808 ± 159.8          | -50 ± 97.0           | 4 |
| 150                  | 928  | -66      | 691  | -294     | 640  | 7        | 871  | 49       | 783 ± 138.7          | -76 ± 153.0          | 4 |
| 165                  | 883  | -110     | 764  | -221     | 559  | -74      | 695  | -127     | 725 ± 135.4          | -133 ± 62.4          | 4 |
| 180                  | 786  | -208     | 803  | -182     | 670  | 37       | 887  | 65       | 787 ± 89.3           | -72 ± 142.7          | 4 |
| 195                  | 994  | 0        | 1097 | 112      | 650  | 17       | 749  | -73      | 872 ± 208.0          | 14 ± 76.1            | 4 |
| 210                  | 707  | -287     | 811  | -174     | 550  | -84      | 619  | -203     | 671 ± 113.1          | -187 ± 83.8          | 4 |
| 225                  | 748  | -245     | 939  | -46      | 492  | -142     | 659  | -163     | 709 ± 186.5          | -149 ± 82.0          | 4 |
| 240                  | 936  | -58      | 677  | -308     | 528  | -106     | 537  | -285     | 669 ± 190.4          | -189 ± 125.9         | 4 |
| 270                  | 1053 | 59       | 740  | -246     | 557  | -76      | 698  | -124     | 762 ± 209.0          | -97 ± 126.0          | 4 |
| 300                  | 905  | -89      | 920  | -65      | 416  | -218     | 678  | -144     | 730 ± 236.8          | -129 ± 67.8          | 4 |
| 330                  | 903  | -91      | 706  | -280     | 459  | -175     | 719  | -103     | 697 ± 182.4          | -162 ± 86.7          | 4 |
| 360                  | 951  | -43      | 817  | -169     | 555  | -78      | 689  | -133     | 753 ± 169.8          | -105 ± 56.0          | 4 |
| 390                  | 892  | -102     | 658  | -327     | 500  | -134     | 603  | -219     | 663 ± 165.8          | -196 ± 100.7         | 4 |
| 420                  | 882  | -112     | 620  | -366     | 430  | -203     | 513  | -310     | 611 ± 196.3          | -248 ± 112.6         | 4 |

CONFIDENTIAL

Appendix 1.3 – Group 3, Fexinidazole 300 mg/kg PO

Body temperature (°C)

| Time from dose (min) | 2482 |          | 2539 |          | 2552 |          | 2057 |          | Absolute Mean ± S.D. | Δ from 0 Mean ± S.D. | N |
|----------------------|------|----------|------|----------|------|----------|------|----------|----------------------|----------------------|---|
|                      | Abs. | Δ from 0 | Abs. | Δ from 0 | Abs. | Δ from 0 | Abs. | Δ from 0 |                      |                      |   |
| -60                  | 37.6 | -0.3     | 37.8 | -0.1     | 38.6 | -0.1     | 37.4 | -0.1     | 37.8 ± 0.51          | -0.1 ± 0.1           | 4 |
| -50                  | 37.7 | -0.2     | 37.8 | 0.0      | 38.5 | -0.1     | 37.2 | -0.3     | 37.8 ± 0.56          | -0.1 ± 0.1           | 4 |
| -40                  | 37.8 | -0.1     | 37.9 | 0.0      | 38.6 | 0.0      | 37.4 | -0.1     | 37.9 ± 0.52          | -0.1 ± 0.1           | 4 |
| -30                  | 37.9 | 0.1      | 37.9 | 0.0      | 38.7 | 0.1      | 37.6 | 0.1      | 38.0 ± 0.46          | 0.1 ± 0.0            | 4 |
| -20                  | 38.0 | 0.2      | 37.9 | 0.1      | 38.7 | 0.1      | 37.7 | 0.2      | 38.1 ± 0.45          | 0.1 ± 0.1            | 4 |
| -10                  | 38.2 | 0.3      | 37.9 | 0.0      | 38.6 | 0.0      | 37.8 | 0.3      | 38.1 ± 0.39          | 0.2 ± 0.2            | 4 |
| 0                    | 37.9 | 0.0      | 37.9 | 0.0      | 38.6 | 0.0      | 37.5 | 0.0      | 38.0 ± 0.48          | 0.0 ± 0.0            | 4 |
| 15                   | 39.3 | 1.4      | 38.8 | 0.9      | 38.7 | 0.1      | 38.0 | 0.5      | 38.7 ± 0.54          | 0.7 ± 0.6            | 4 |
| 30                   | 39.4 | 1.5      | 38.5 | 0.7      | 38.9 | 0.2      | 38.0 | 0.5      | 38.7 ± 0.56          | 0.7 ± 0.5            | 4 |
| 45                   | 39.2 | 1.3      | 38.4 | 0.5      | 38.9 | 0.3      | 38.1 | 0.6      | 38.6 ± 0.49          | 0.7 ± 0.4            | 4 |
| 60                   | 39.1 | 1.2      | 38.9 | 1.1      | 39.0 | 0.4      | 38.5 | 1.0      | 38.9 ± 0.29          | 0.9 ± 0.4            | 4 |
| 75                   | 38.9 | 1.1      | 38.7 | 0.8      | 39.1 | 0.5      | 38.3 | 0.8      | 38.8 ± 0.34          | 0.8 ± 0.2            | 4 |
| 90                   | 38.9 | 1.0      | 38.8 | 0.9      | 39.1 | 0.5      | 38.3 | 0.8      | 38.8 ± 0.33          | 0.8 ± 0.2            | 4 |
| 105                  | 38.8 | 0.9      | 38.5 | 0.7      | 39.2 | 0.6      | 38.3 | 0.8      | 38.7 ± 0.40          | 0.7 ± 0.1            | 4 |
| 120                  | 38.6 | 0.7      | 38.4 | 0.6      | 39.2 | 0.6      | 38.4 | 0.9      | 38.6 ± 0.39          | 0.7 ± 0.1            | 4 |
| 135                  | 38.4 | 0.5      | 38.2 | 0.4      | 39.2 | 0.6      | 38.2 | 0.7      | 38.5 ± 0.46          | 0.5 ± 0.2            | 4 |
| 150                  | 38.3 | 0.4      | 38.1 | 0.3      | 39.2 | 0.5      | 37.9 | 0.5      | 38.4 ± 0.55          | 0.4 ± 0.1            | 4 |
| 165                  | 38.2 | 0.3      | 38.2 | 0.3      | 39.1 | 0.5      | 37.7 | 0.2      | 38.3 ± 0.60          | 0.3 ± 0.1            | 4 |
| 180                  | 38.1 | 0.2      | 38.1 | 0.3      | 39.2 | 0.6      | 37.8 | 0.3      | 38.3 ± 0.62          | 0.3 ± 0.2            | 4 |
| 195                  | 38.1 | 0.2      | 38.3 | 0.4      | 39.3 | 0.6      | 37.9 | 0.4      | 38.4 ± 0.60          | 0.4 ± 0.2            | 4 |
| 210                  | 37.9 | 0.0      | 38.5 | 0.6      | 39.3 | 0.7      | 37.8 | 0.4      | 38.4 ± 0.69          | 0.4 ± 0.3            | 4 |
| 225                  | 38.0 | 0.1      | 38.4 | 0.5      | 39.3 | 0.7      | 38.0 | 0.5      | 38.4 ± 0.62          | 0.5 ± 0.2            | 4 |
| 240                  | 38.2 | 0.3      | 38.4 | 0.5      | 39.3 | 0.6      | 38.1 | 0.6      | 38.5 ± 0.54          | 0.5 ± 0.2            | 4 |
| 270                  | 38.1 | 0.3      | 38.4 | 0.5      | 39.3 | 0.7      | 38.2 | 0.7      | 38.5 ± 0.54          | 0.5 ± 0.2            | 4 |
| 300                  | 38.1 | 0.2      | 38.4 | 0.5      | 39.4 | 0.8      | 38.4 | 0.9      | 38.6 ± 0.57          | 0.6 ± 0.3            | 4 |
| 330                  | 38.1 | 0.2      | 38.0 | 0.1      | 39.7 | 1.0      | 38.6 | 1.1      | 38.6 ± 0.77          | 0.6 ± 0.5            | 4 |
| 360                  | 37.8 | 0.0      | 37.9 | 0.0      | 40.0 | 1.3      | 38.2 | 0.7      | 38.5 ± 1.01          | 0.5 ± 0.7            | 4 |
| 390                  | 37.9 | 0.1      | 37.8 | 0.0      | 39.8 | 1.2      | 38.5 | 1.0      | 38.5 ± 0.93          | 0.6 ± 0.6            | 4 |
| 420                  | 38.0 | 0.1      | 37.3 | -0.5     | 40.2 | 1.5      | 38.4 | 1.0      | 38.5 ± 1.20          | 0.5 ± 0.9            | 4 |

CONFIDENTIAL

Appendix 1.4 – Group 4, Fexinidazole 1000 mg/kg PO

Systolic blood pressure (mm Hg)

| Time from dose (min) | 2482 |          | 2539 |          | 2552 |          | 2057 |          | Absolute Mean ± S.D. | Δ from 0 Mean ± S.D. | N |
|----------------------|------|----------|------|----------|------|----------|------|----------|----------------------|----------------------|---|
|                      | Abs. | Δ from 0 | Abs. | Δ from 0 | Abs. | Δ from 0 | Abs. | Δ from 0 |                      |                      |   |
| -60                  | 185  | 23       | 184  | 37       | 165  | 15       | 138  | -2       | 168 ± 22.1           | 18 ± 16.2            | 4 |
| -50                  | 160  | -2       | 140  | -7       | 146  | -4       | 132  | -8       | 145 ± 11.7           | -5 ± 2.7             | 4 |
| -40                  | 152  | -10      | 139  | -8       | 163  | 13       | 135  | -4       | 147 ± 12.5           | -2 ± 10.3            | 4 |
| -30                  | 164  | 2        | 144  | -4       | 149  | -1       | 147  | 8        | 151 ± 8.8            | 1 ± 4.8              | 4 |
| -20                  | 156  | -6       | 135  | -12      | 145  | -5       | 146  | 7        | 145 ± 8.5            | -4 ± 7.9             | 4 |
| -10                  | 155  | -6       | 142  | -6       | 133  | -17      | 140  | 0        | 142 ± 9.5            | -7 ± 7.3             | 4 |
| 0                    | 162  | 0        | 147  | 0        | 150  | 0        | 140  | 0        | 150 ± 9.2            | 0 ± 0.0              | 4 |
| 15                   | 161  | -1       | 159  | 12       | 145  | -5       | 133  | -7       | 150 ± 13.2           | 0 ± 8.3              | 4 |
| 30                   | 173  | 12       | 183  | 36       | 156  | 6        | 142  | 2        | 164 ± 18.5           | 14 ± 15.4            | 4 |
| 45                   | 154  | -8       | 187  | 39       | 155  | 5        | 150  | 10       | 161 ± 17.0           | 12 ± 20.1            | 4 |
| 60                   | 147  | -15      | 144  | -3       | 155  | 5        | 141  | 2        | 147 ± 5.8            | -3 ± 8.8             | 4 |
| 75                   | 169  | 7        | 159  | 12       | 168  | 18       | 161  | 21       | 164 ± 5.0            | 14 ± 6.5             | 4 |
| 90                   | 155  | -7       | 152  | 5        | 169  | 19       | 147  | 7        | 156 ± 9.6            | 6 ± 10.6             | 4 |
| 105                  | 155  | -7       | 146  | -1       | 163  | 13       | 149  | 9        | 153 ± 7.4            | 4 ± 8.9              | 4 |
| 120                  | 151  | -11      | 146  | -1       | 167  | 17       | 134  | -6       | 149 ± 13.4           | 0 ± 11.9             | 4 |
| 135                  | 153  | -9       | 141  | -6       | 166  | 16       | 152  | 12       | 153 ± 9.9            | 3 ± 12.3             | 4 |
| 150                  | 157  | -5       | 145  | -3       | 163  | 13       | 155  | 15       | 155 ± 7.8            | 5 ± 10.4             | 4 |
| 165                  | 181  | 19       | 136  | -12      | 162  | 12       | 160  | 20       | 160 ± 18.5           | 10 ± 14.8            | 4 |
| 180                  | 155  | -6       | 155  | 8        | 156  | 6        | 156  | 16       | 156 ± 0.4            | 6 ± 9.3              | 4 |
| 195                  | 155  | -7       | 145  | -3       | 175  | 25       | 154  | 14       | 157 ± 12.8           | 7 ± 14.9             | 4 |
| 210                  | 157  | -5       | 157  | 9        | 177  | 27       | 146  | 6        | 159 ± 12.9           | 9 ± 13.0             | 4 |
| 225                  | 151  | -10      | 153  | 6        | 170  | 20       | 145  | 5        | 155 ± 10.9           | 5 ± 12.4             | 4 |
| 240                  | 156  | -6       | 153  | 6        | 157  | 7        | 142  | 2        | 152 ± 7.2            | 2 ± 5.9              | 4 |
| 270                  | 144  | -18      | 145  | -2       | 164  | 14       | 146  | 6        | 150 ± 9.5            | 0 ± 13.6             | 4 |
| 300                  | 145  | -17      | 138  | -9       | 148  | -2       | 157  | 17       | 147 ± 8.0            | -3 ± 14.8            | 4 |
| 330                  | 150  | -12      | 134  | -13      | 162  | 12       | 156  | 16       | 150 ± 12.0           | 1 ± 15.5             | 4 |
| 360                  | 133  | -29      | 153  | 6        | 156  | 6        | 156  | 17       | 150 ± 11.4           | 0 ± 20.0             | 4 |
| 390                  | 165  | 3        | 162  | 15       | 162  | 12       | 151  | 11       | 160 ± 6.2            | 10 ± 5.2             | 4 |
| 420                  | 155  | -7       | 181  | 33       | 172  | 22       | 164  | 24       | 168 ± 10.9           | 18 ± 17.3            | 4 |

CONFIDENTIAL

Appendix 1.4 – Group 4, Fexinidazole 1000 mg/kg PO

Diastolic blood pressure (mm Hg)

| Time from dose (min) | 2482 |          | 2539 |          | 2552 |          | 2057 |          | Absolute Mean ± S.D. | Δ from 0 Mean ± S.D. | N |
|----------------------|------|----------|------|----------|------|----------|------|----------|----------------------|----------------------|---|
|                      | Abs. | Δ from 0 | Abs. | Δ from 0 | Abs. | Δ from 0 | Abs. | Δ from 0 |                      |                      |   |
| -60                  | 102  | 11       | 110  | 26       | 110  | 15       | 85   | -6       | 102 ± 11.8           | 11 ± 13.0            | 4 |
| -50                  | 87   | -4       | 81   | -3       | 91   | -5       | 85   | -5       | 86 ± 4.0             | -4 ± 1.0             | 4 |
| -40                  | 86   | -5       | 85   | 1        | 106  | 10       | 84   | -7       | 90 ± 10.4            | 0 ± 7.6              | 4 |
| -30                  | 95   | 4        | 80   | -4       | 89   | -6       | 101  | 10       | 91 ± 8.7             | 1 ± 7.4              | 4 |
| -20                  | 89   | -2       | 74   | -10      | 94   | -1       | 100  | 9        | 89 ± 10.9            | -1 ± 7.8             | 4 |
| -10                  | 87   | -4       | 74   | -10      | 82   | -13      | 89   | -2       | 83 ± 6.5             | -7 ± 5.2             | 4 |
| 0                    | 91   | 0        | 84   | 0        | 95   | 0        | 91   | 0        | 90 ± 4.7             | 0 ± 0.0              | 4 |
| 15                   | 109  | 18       | 98   | 14       | 90   | -6       | 86   | -5       | 96 ± 10.3            | 5 ± 12.3             | 4 |
| 30                   | 96   | 5        | 107  | 23       | 103  | 7        | 96   | 5        | 100 ± 5.5            | 10 ± 8.6             | 4 |
| 45                   | 88   | -3       | 121  | 37       | 111  | 16       | 96   | 5        | 104 ± 14.8           | 14 ± 17.3            | 4 |
| 60                   | 90   | -1       | 84   | 0        | 107  | 11       | 98   | 8        | 95 ± 9.9             | 4 ± 6.0              | 4 |
| 75                   | 104  | 12       | 95   | 11       | 113  | 18       | 108  | 17       | 105 ± 7.8            | 14 ± 3.6             | 4 |
| 90                   | 94   | 3        | 89   | 5        | 111  | 16       | 96   | 5        | 98 ± 9.4             | 7 ± 5.7              | 4 |
| 105                  | 92   | 1        | 87   | 3        | 110  | 15       | 99   | 8        | 97 ± 10.0            | 7 ± 6.1              | 4 |
| 120                  | 88   | -4       | 79   | -5       | 117  | 22       | 86   | -5       | 92 ± 16.9            | 2 ± 13.1             | 4 |
| 135                  | 90   | -1       | 81   | -3       | 115  | 20       | 98   | 8        | 96 ± 14.5            | 6 ± 10.4             | 4 |
| 150                  | 96   | 5        | 83   | -1       | 108  | 13       | 105  | 15       | 98 ± 11.3            | 8 ± 7.3              | 4 |
| 165                  | 102  | 11       | 71   | -13      | 116  | 21       | 111  | 20       | 100 ± 19.9           | 10 ± 15.6            | 4 |
| 180                  | 97   | 6        | 94   | 10       | 108  | 13       | 107  | 16       | 102 ± 7.2            | 11 ± 4.5             | 4 |
| 195                  | 92   | 1        | 80   | -4       | 126  | 31       | 105  | 14       | 101 ± 19.9           | 10 ± 15.7            | 4 |
| 210                  | 92   | 1        | 92   | 8        | 118  | 23       | 99   | 8        | 100 ± 12.3           | 10 ± 9.1             | 4 |
| 225                  | 88   | -3       | 84   | -1       | 114  | 19       | 92   | 1        | 94 ± 13.5            | 4 ± 9.8              | 4 |
| 240                  | 94   | 2        | 89   | 5        | 108  | 13       | 96   | 5        | 97 ± 8.1             | 6 ± 4.4              | 4 |
| 270                  | 89   | -3       | 83   | -1       | 112  | 17       | 97   | 7        | 95 ± 12.7            | 5 ± 8.9              | 4 |
| 300                  | 95   | 4        | 81   | -3       | 112  | 17       | 106  | 15       | 99 ± 13.6            | 8 ± 9.4              | 4 |
| 330                  | 99   | 8        | 83   | -1       | 116  | 21       | 112  | 21       | 102 ± 14.7           | 12 ± 10.6            | 4 |
| 360                  | 83   | -8       | 91   | 7        | 105  | 9        | 113  | 23       | 98 ± 13.5            | 8 ± 12.6             | 4 |
| 390                  | 111  | 20       | 91   | 7        | 114  | 19       | 102  | 12       | 105 ± 10.6           | 14 ± 6.4             | 4 |
| 420                  | 99   | 8        | 106  | 22       | 127  | 31       | 124  | 34       | 114 ± 13.3           | 24 ± 11.4            | 4 |

CONFIDENTIAL

Appendix 1.4 – Group 4, Fexinidazole 1000 mg/kg PO

Mean blood pressure (mm Hg)

| Time from dose (min) | 2482 |          | 2539 |          | 2552 |          | 2057 |          | Absolute Mean ± S.D. | Δ from 0 Mean ± S.D. | N |
|----------------------|------|----------|------|----------|------|----------|------|----------|----------------------|----------------------|---|
|                      | Abs. | Δ from 0 | Abs. | Δ from 0 | Abs. | Δ from 0 | Abs. | Δ from 0 |                      |                      |   |
| -60                  | 133  | 16       | 140  | 35       | 132  | 15       | 104  | -3       | 128 ± 16.0           | 16 ± 15.8            | 4 |
| -50                  | 114  | -4       | 100  | -5       | 114  | -4       | 101  | -6       | 107 ± 7.5            | -5 ± 1.0             | 4 |
| -40                  | 110  | -7       | 96   | -9       | 130  | 12       | 100  | -7       | 109 ± 14.9           | -3 ± 9.8             | 4 |
| -30                  | 122  | 4        | 102  | -3       | 113  | -4       | 117  | 9        | 114 ± 8.2            | 2 ± 6.4              | 4 |
| -20                  | 113  | -4       | 94   | -11      | 115  | -3       | 116  | 8        | 109 ± 10.4           | -2 ± 8.0             | 4 |
| -10                  | 111  | -6       | 98   | -7       | 102  | -15      | 106  | -1       | 105 ± 5.7            | -7 ± 6.0             | 4 |
| 0                    | 117  | 0        | 105  | 0        | 118  | 0        | 107  | 0        | 112 ± 6.6            | 0 ± 0.0              | 4 |
| 15                   | 127  | 10       | 120  | 15       | 113  | -5       | 102  | -6       | 116 ± 10.9           | 4 ± 10.5             | 4 |
| 30                   | 126  | 9        | 136  | 31       | 124  | 7        | 112  | 5        | 125 ± 10.0           | 13 ± 12.4            | 4 |
| 45                   | 113  | -4       | 141  | 36       | 129  | 12       | 113  | 6        | 124 ± 13.8           | 12 ± 17.3            | 4 |
| 60                   | 111  | -6       | 106  | 1        | 127  | 9        | 114  | 6        | 114 ± 8.9            | 2 ± 6.7              | 4 |
| 75                   | 130  | 13       | 118  | 13       | 136  | 18       | 127  | 20       | 128 ± 7.3            | 16 ± 3.5             | 4 |
| 90                   | 117  | 0        | 114  | 8        | 136  | 18       | 112  | 4        | 120 ± 11.0           | 8 ± 7.8              | 4 |
| 105                  | 116  | -1       | 107  | 2        | 131  | 13       | 116  | 8        | 117 ± 10.1           | 6 ± 6.6              | 4 |
| 120                  | 109  | -8       | 102  | -4       | 138  | 20       | 102  | -6       | 113 ± 17.0           | 1 ± 12.8             | 4 |
| 135                  | 114  | -3       | 102  | -3       | 136  | 18       | 117  | 10       | 117 ± 14.2           | 5 ± 10.7             | 4 |
| 150                  | 119  | 2        | 105  | -1       | 131  | 13       | 123  | 16       | 119 ± 11.1           | 8 ± 8.1              | 4 |
| 165                  | 132  | 15       | 93   | -12      | 135  | 17       | 128  | 21       | 122 ± 19.4           | 10 ± 14.9            | 4 |
| 180                  | 120  | 3        | 116  | 11       | 130  | 12       | 123  | 16       | 122 ± 5.9            | 10 ± 5.6             | 4 |
| 195                  | 117  | 0        | 104  | -2       | 148  | 30       | 122  | 14       | 122 ± 18.5           | 11 ± 14.7            | 4 |
| 210                  | 117  | 0        | 115  | 10       | 144  | 26       | 115  | 8        | 123 ± 14.1           | 11 ± 10.9            | 4 |
| 225                  | 113  | -4       | 110  | 5        | 137  | 19       | 110  | 3        | 118 ± 12.8           | 6 ± 9.6              | 4 |
| 240                  | 119  | 1        | 113  | 8        | 129  | 11       | 114  | 6        | 119 ± 7.3            | 7 ± 4.2              | 4 |
| 270                  | 109  | -8       | 108  | 3        | 134  | 17       | 116  | 8        | 117 ± 12.2           | 5 ± 10.2             | 4 |
| 300                  | 113  | -4       | 100  | -5       | 127  | 9        | 123  | 16       | 116 ± 12.2           | 4 ± 10.4             | 4 |
| 330                  | 116  | -1       | 100  | -5       | 135  | 18       | 126  | 19       | 120 ± 15.0           | 8 ± 12.4             | 4 |
| 360                  | 101  | -16      | 111  | 6        | 126  | 8        | 128  | 20       | 117 ± 12.8           | 5 ± 15.3             | 4 |
| 390                  | 131  | 14       | 115  | 10       | 134  | 16       | 118  | 10       | 125 ± 9.6            | 13 ± 3.1             | 4 |
| 420                  | 119  | 2        | 131  | 26       | 146  | 28       | 138  | 31       | 134 ± 11.2           | 22 ± 13.1            | 4 |



CONFIDENTIAL

Appendix 1.4 – Group 4, Fexinidazole 1000 mg/kg PO

Heart rate (beats/min)

| Time from dose (min) | 2482 |          | 2539 |          | 2552 |          | 2057 |          | Absolute Mean ± S.D. | Δ from 0 Mean ± S.D. | N |
|----------------------|------|----------|------|----------|------|----------|------|----------|----------------------|----------------------|---|
|                      | Abs. | Δ from 0 | Abs. | Δ from 0 | Abs. | Δ from 0 | Abs. | Δ from 0 |                      |                      |   |
| -60                  | 100  | 30       | 175  | 86       | 123  | 24       | 116  | 28       | 129 ± 32.5           | 42 ± 29.4            | 4 |
| -50                  | 54   | -17      | 60   | -30      | 100  | 1        | 62   | -27      | 69 ± 21.0            | -18 ± 13.7           | 4 |
| -40                  | 56   | -15      | 78   | -11      | 101  | 2        | 67   | -21      | 76 ± 19.1            | -11 ± 9.6            | 4 |
| -30                  | 79   | 8        | 64   | -26      | 81   | -18      | 90   | 2        | 78 ± 11.0            | -9 ± 16.3            | 4 |
| -20                  | 63   | -8       | 72   | -18      | 99   | 0        | 97   | 9        | 83 ± 18.3            | -4 ± 11.4            | 4 |
| -10                  | 73   | 2        | 89   | -1       | 91   | -9       | 98   | 9        | 87 ± 10.6            | 0 ± 7.4              | 4 |
| 0                    | 71   | 0        | 90   | 0        | 99   | 0        | 88   | 0        | 87 ± 11.8            | 0 ± 0.0              | 4 |
| 15                   | 120  | 50       | 148  | 59       | 123  | 24       | 100  | 12       | 123 ± 19.7           | 36 ± 21.8            | 4 |
| 30                   | 120  | 49       | 172  | 82       | 164  | 64       | 105  | 17       | 140 ± 32.6           | 53 ± 27.8            | 4 |
| 45                   | 93   | 22       | 199  | 109      | 176  | 77       | 94   | 6        | 141 ± 54.9           | 54 ± 48.0            | 4 |
| 60                   | 80   | 9        | 107  | 17       | 129  | 30       | 116  | 28       | 108 ± 20.8           | 21 ± 9.7             | 4 |
| 75                   | 132  | 62       | 121  | 31       | 118  | 19       | 126  | 37       | 124 ± 6.4            | 37 ± 18.1            | 4 |
| 90                   | 84   | 13       | 99   | 9        | 141  | 42       | 94   | 5        | 104 ± 25.1           | 17 ± 16.5            | 4 |
| 105                  | 85   | 14       | 99   | 9        | 113  | 14       | 92   | 3        | 97 ± 11.8            | 10 ± 5.1             | 4 |
| 120                  | 78   | 7        | 77   | -13      | 120  | 21       | 78   | -10      | 88 ± 21.4            | 1 ± 16.0             | 4 |
| 135                  | 82   | 12       | 90   | 0        | 118  | 19       | 126  | 37       | 104 ± 21.1           | 17 ± 15.7            | 4 |
| 150                  | 91   | 20       | 94   | 5        | 146  | 46       | 115  | 26       | 111 ± 25.1           | 24 ± 17.2            | 4 |
| 165                  | 119  | 48       | 95   | 5        | 114  | 15       | 110  | 21       | 109 ± 10.3           | 22 ± 18.2            | 4 |
| 180                  | 87   | 16       | 105  | 16       | 132  | 33       | 101  | 13       | 107 ± 18.9           | 20 ± 9.2             | 4 |
| 195                  | 103  | 33       | 118  | 28       | 138  | 39       | 119  | 30       | 119 ± 14.2           | 32 ± 4.6             | 4 |
| 210                  | 103  | 32       | 101  | 12       | 150  | 51       | 103  | 15       | 114 ± 23.6           | 27 ± 18.0            | 4 |
| 225                  | 123  | 52       | 113  | 23       | 119  | 20       | 97   | 9        | 113 ± 11.2           | 26 ± 18.3            | 4 |
| 240                  | 104  | 33       | 124  | 34       | 122  | 23       | 140  | 52       | 123 ± 14.7           | 36 ± 11.9            | 4 |
| 270                  | 101  | 30       | 134  | 45       | 144  | 45       | 154  | 65       | 133 ± 22.8           | 46 ± 14.3            | 4 |
| 300                  | 79   | 8        | 83   | -6       | 133  | 34       | 93   | 4        | 97 ± 24.7            | 10 ± 17.1            | 4 |
| 330                  | 87   | 16       | 83   | -7       | 143  | 44       | 116  | 27       | 107 ± 27.9           | 20 ± 21.2            | 4 |
| 360                  | 77   | 7        | 70   | -20      | 111  | 12       | 111  | 23       | 92 ± 21.8            | 5 ± 18.0             | 4 |
| 390                  | 101  | 30       | 91   | 1        | 123  | 24       | 90   | 2        | 101 ± 15.2           | 14 ± 14.9            | 4 |
| 420                  | 71   | 0        | 107  | 18       | 114  | 15       | 171  | 83       | 116 ± 41.4           | 29 ± 36.7            | 4 |

CONFIDENTIAL

Appendix 1.4 – Group 4, Fexinidazole 1000 mg/kg PO

Uncorrected QT interval (msec)

| Time from dose (min) | 2482 |          | 2539 |          | 2552 |          | 2057 |          | Absolute Mean ± S.D. | Δ from 0 Mean ± S.D. | N |
|----------------------|------|----------|------|----------|------|----------|------|----------|----------------------|----------------------|---|
|                      | Abs. | Δ from 0 | Abs. | Δ from 0 | Abs. | Δ from 0 | Abs. | Δ from 0 |                      |                      |   |
| -60                  | 187  | -30      | 141  | -54      | 179  | -15      | 185  | -14      | 173 ± 21.7           | -28 ± 18.5           | 4 |
| -50                  | 231  | 14       | 212  | 17       | 198  | 3        | 207  | 9        | 212 ± 14.2           | 11 ± 6.2             | 4 |
| -40                  | 228  | 11       | 204  | 10       | 198  | 3        | 216  | 18       | 212 ± 13.6           | 10 ± 6.0             | 4 |
| -30                  | 221  | 3        | 213  | 18       | 193  | -1       | 205  | 6        | 208 ± 11.7           | 7 ± 8.4              | 4 |
| -20                  | 222  | 5        | 201  | 7        | 198  | 4        | 192  | -7       | 203 ± 13.1           | 2 ± 6.1              | 4 |
| -10                  | 214  | -4       | 196  | 2        | 201  | 6        | 187  | -11      | 200 ± 11.1           | -2 ± 7.6             | 4 |
| 0                    | 217  | 0        | 194  | 0        | 195  | 0        | 198  | 0        | 201 ± 10.9           | 0 ± 0.0              | 4 |
| 15                   | 186  | -32      | 165  | -29      | 185  | -10      | 198  | 0        | 184 ± 13.6           | -18 ± 15.2           | 4 |
| 30                   | 175  | -42      | 148  | -47      | 167  | -28      | 189  | -9       | 170 ± 17.2           | -32 ± 16.8           | 4 |
| 45                   | 202  | -15      | 132  | -62      | 176  | -19      | 193  | -5       | 176 ± 31.0           | -25 ± 25.2           | 4 |
| 60                   | 207  | -10      | 175  | -20      | 174  | -20      | 196  | -2       | 188 ± 16.4           | -13 ± 8.6            | 4 |
| 75                   | 183  | -34      | 186  | -8       | 176  | -19      | 185  | -13      | 183 ± 4.6            | -19 ± 11.1           | 4 |
| 90                   | 205  | -13      | 213  | 19       | 173  | -21      | 204  | 5        | 199 ± 17.5           | -3 ± 17.9            | 4 |
| 105                  | 194  | -23      | 205  | 11       | 188  | -7       | 191  | -8       | 195 ± 7.7            | -7 ± 13.9            | 4 |
| 120                  | 219  | 1        | 209  | 15       | 192  | -3       | 207  | 9        | 207 ± 11.1           | 6 ± 7.8              | 4 |
| 135                  | 210  | -7       | 209  | 14       | 193  | -1       | 193  | -5       | 201 ± 9.3            | 0 ± 9.6              | 4 |
| 150                  | 205  | -12      | 197  | 2        | 171  | -23      | 191  | -7       | 191 ± 14.3           | -10 ± 10.6           | 4 |
| 165                  | 178  | -39      | 195  | 0        | 195  | 1        | 189  | -9       | 189 ± 7.8            | -12 ± 18.6           | 4 |
| 180                  | 205  | -12      | 198  | 3        | 189  | -6       | 191  | -7       | 196 ± 7.4            | -5 ± 6.5             | 4 |
| 195                  | 212  | -5       | 205  | 11       | 168  | -26      | 202  | 3        | 197 ± 19.5           | -4 ± 16.1            | 4 |
| 210                  | 209  | -9       | 187  | -8       | 177  | -18      | 200  | 1        | 193 ± 14.1           | -8 ± 7.9             | 4 |
| 225                  | 206  | -11      | 196  | 1        | 191  | -4       | 202  | 4        | 199 ± 6.9            | -2 ± 6.3             | 4 |
| 240                  | 206  | -11      | 190  | -4       | 190  | -5       | 182  | -16      | 192 ± 10.3           | -9 ± 5.8             | 4 |
| 270                  | 208  | -10      | 179  | -16      | 175  | -19      | 178  | -20      | 185 ± 15.2           | -16 ± 4.9            | 4 |
| 300                  | 227  | 10       | 238  | 43       | 182  | -12      | 210  | 12       | 214 ± 24.1           | 13 ± 22.8            | 4 |
| 330                  | 225  | 8        | 223  | 29       | 183  | -12      | 223  | 25       | 214 ± 20.6           | 12 ± 18.5            | 4 |
| 360                  | 249  | 32       | 234  | 40       | 208  | 14       | 209  | 11       | 225 ± 20.0           | 24 ± 14.1            | 4 |
| 390                  | 206  | -11      | 224  | 30       | 195  | 0        | 228  | 30       | 213 ± 15.6           | 12 ± 20.6            | 4 |
| 420                  | 241  | 24       | 209  | 15       | 203  | 9        | 184  | -15      | 209 ± 23.7           | 8 ± 16.4             | 4 |

CONFIDENTIAL

Appendix 1.4 – Group 4, Fexinidazole 1000 mg/kg PO  
Corrected QT interval (covariate analysis, QTca) (msec)

| Time from dose (min) | 2482 |          | 2539 |          | 2552 |          | 2057 |          | Absolute Mean ± S.D. | Δ from 0 Mean ± S.D. | N |
|----------------------|------|----------|------|----------|------|----------|------|----------|----------------------|----------------------|---|
|                      | Abs. | Δ from 0 | Abs. | Δ from 0 | Abs. | Δ from 0 | Abs. | Δ from 0 |                      |                      |   |
| -60                  | 186  | -12      | 159  | -24      | 186  | -6       | 189  | -2       | 180 ± 14.2           | -11 ± 9.9            | 4 |
| -50                  | 200  | 2        | 187  | 4        | 195  | 2        | 186  | -5       | 192 ± 6.6            | 1 ± 3.6              | 4 |
| -40                  | 199  | 1        | 189  | 5        | 196  | 3        | 198  | 8        | 196 ± 4.8            | 5 ± 2.9              | 4 |
| -30                  | 207  | 9        | 191  | 8        | 186  | -6       | 197  | 7        | 195 ± 8.8            | 4 ± 7.0              | 4 |
| -20                  | 199  | 1        | 185  | 2        | 197  | 4        | 188  | -2       | 192 ± 6.7            | 1 ± 2.7              | 4 |
| -10                  | 196  | -2       | 189  | 6        | 195  | 3        | 184  | -6       | 191 ± 5.6            | 0 ± 5.2              | 4 |
| 0                    | 198  | 0        | 183  | 0        | 192  | 0        | 190  | 0        | 191 ± 6.0            | 0 ± 0.0              | 4 |
| 15                   | 191  | -7       | 179  | -5       | 193  | 1        | 197  | 7        | 190 ± 7.9            | -1 ± 6.2             | 4 |
| 30                   | 181  | -17      | 167  | -16      | 185  | -7       | 189  | -1       | 181 ± 9.7            | -10 ± 7.5            | 4 |
| 45                   | 197  | -1       | 158  | -26      | 201  | 8        | 188  | -3       | 186 ± 19.6           | -5 ± 14.5            | 4 |
| 60                   | 195  | -3       | 176  | -7       | 185  | -8       | 202  | 11       | 189 ± 11.4           | -2 ± 8.9             | 4 |
| 75                   | 194  | -4       | 193  | 10       | 183  | -10      | 192  | 2        | 191 ± 5.4            | -1 ± 8.6             | 4 |
| 90                   | 196  | -2       | 213  | 29       | 187  | -6       | 195  | 4        | 198 ± 10.8           | 7 ± 15.7             | 4 |
| 105                  | 187  | -11      | 201  | 17       | 192  | 0        | 184  | -6       | 191 ± 7.1            | 0 ± 12.3             | 4 |
| 120                  | 205  | 7        | 194  | 10       | 199  | 6        | 195  | 5        | 198 ± 4.9            | 7 ± 2.2              | 4 |
| 135                  | 200  | 2        | 200  | 17       | 199  | 7        | 199  | 9        | 200 ± 0.4            | 9 ± 6.2              | 4 |
| 150                  | 200  | 2        | 191  | 8        | 187  | -6       | 194  | 4        | 193 ± 5.5            | 2 ± 5.7              | 4 |
| 165                  | 183  | -15      | 191  | 7        | 199  | 7        | 190  | -1       | 191 ± 6.5            | 0 ± 10.2             | 4 |
| 180                  | 199  | 1        | 198  | 15       | 201  | 9        | 187  | -3       | 196 ± 6.3            | 5 ± 8.2              | 4 |
| 195                  | 213  | 15       | 213  | 29       | 180  | -12      | 204  | 14       | 202 ± 15.4           | 11 ± 17.3            | 4 |
| 210                  | 210  | 12       | 186  | 3        | 193  | 0        | 201  | 11       | 198 ± 10.1           | 7 ± 5.7              | 4 |
| 225                  | 213  | 15       | 200  | 16       | 197  | 5        | 197  | 7        | 202 ± 7.6            | 11 ± 5.8             | 4 |
| 240                  | 207  | 9        | 197  | 13       | 198  | 5        | 196  | 6        | 199 ± 5.1            | 8 ± 3.7              | 4 |
| 270                  | 207  | 9        | 191  | 7        | 190  | -2       | 196  | 6        | 196 ± 8.0            | 5 ± 5.0              | 4 |
| 300                  | 213  | 15       | 226  | 43       | 193  | 1        | 205  | 15       | 209 ± 13.6           | 18 ± 17.5            | 4 |
| 330                  | 215  | 17       | 211  | 28       | 198  | 5        | 229  | 39       | 213 ± 13.0           | 22 ± 14.4            | 4 |
| 360                  | 234  | 36       | 213  | 30       | 212  | 20       | 209  | 19       | 217 ± 11.4           | 26 ± 8.3             | 4 |
| 390                  | 206  | 8        | 219  | 35       | 203  | 10       | 219  | 28       | 211 ± 8.6            | 20 ± 13.7            | 4 |
| 420                  | 222  | 24       | 212  | 28       | 209  | 17       | 208  | 17       | 213 ± 6.2            | 21 ± 5.5             | 4 |

CONFIDENTIAL

Appendix 1.4 – Group 4, Fexinidazole 1000 mg/kg PO

PR interval (msec)

| Time from dose (min) | 2482 |          | 2539 |          | 2552 |          | 2057 |          | Absolute Mean ± S.D. | Δ from 0 Mean ± S.D. | N |
|----------------------|------|----------|------|----------|------|----------|------|----------|----------------------|----------------------|---|
|                      | Abs. | Δ from 0 | Abs. | Δ from 0 | Abs. | Δ from 0 | Abs. | Δ from 0 |                      |                      |   |
| -60                  | 95   | -13      | 81   | -21      | 95   | 3        | 88   | -2       | 90 ± 6.6             | -8 ± 10.4            | 4 |
| -50                  | 108  | 1        | 110  | 8        | 92   | -1       | 95   | 4        | 101 ± 9.2            | 3 ± 4.1              | 4 |
| -40                  | 111  | 3        | 110  | 8        | 94   | 1        | 90   | 0        | 101 ± 10.7           | 3 ± 3.8              | 4 |
| -30                  | 113  | 6        | 102  | 0        | 89   | -4       | 89   | -1       | 98 ± 11.6            | 0 ± 4.2              | 4 |
| -20                  | 108  | 1        | 104  | 2        | 96   | 4        | 90   | 0        | 100 ± 7.9            | 1 ± 1.7              | 4 |
| -10                  | 110  | 2        | 104  | 2        | 91   | -2       | 91   | 1        | 99 ± 9.3             | 1 ± 1.9              | 4 |
| 0                    | 107  | 0        | 102  | 0        | 93   | 0        | 91   | 0        | 98 ± 7.8             | 0 ± 0.0              | 4 |
| 15                   | 97   | -11      | 87   | -15      | 89   | -4       | 90   | -1       | 91 ± 4.1             | -8 ± 6.3             | 4 |
| 30                   | 77   | -31      | 86   | -16      | 86   | -7       | 89   | -2       | 84 ± 5.3             | -14 ± 12.6           | 4 |
| 45                   | 96   | -11      | 71   | -31      | 87   | -6       | 88   | -3       | 85 ± 10.6            | -13 ± 12.5           | 4 |
| 60                   | 103  | -4       | 102  | 0        | 92   | -1       | 90   | -1       | 97 ± 6.7             | -2 ± 1.8             | 4 |
| 75                   | 96   | -11      | 99   | -3       | 95   | 2        | 85   | -6       | 94 ± 6.0             | -5 ± 5.5             | 4 |
| 90                   | 101  | -6       | 99   | -3       | 92   | -1       | 91   | 0        | 96 ± 4.9             | -2 ± 2.9             | 4 |
| 105                  | 96   | -11      | 101  | 0        | 86   | -7       | 88   | -3       | 93 ± 7.4             | -6 ± 4.7             | 4 |
| 120                  | 102  | -6       | 107  | 5        | 91   | -2       | 96   | 5        | 99 ± 7.2             | 1 ± 5.6              | 4 |
| 135                  | 100  | -7       | 103  | 1        | 90   | -3       | 83   | -8       | 94 ± 9.4             | -4 ± 4.3             | 4 |
| 150                  | 98   | -10      | 101  | -1       | 90   | -2       | 86   | -5       | 94 ± 6.7             | -4 ± 3.7             | 4 |
| 165                  | 86   | -21      | 105  | 3        | 91   | -2       | 89   | -2       | 93 ± 8.2             | -5 ± 10.7            | 4 |
| 180                  | 101  | -7       | 101  | -1       | 93   | 0        | 82   | -9       | 94 ± 8.8             | -4 ± 4.4             | 4 |
| 195                  | 96   | -11      | 98   | -4       | 101  | 8        | 87   | -3       | 96 ± 5.9             | -3 ± 8.0             | 4 |
| 210                  | 95   | -13      | 108  | 6        | 95   | 2        | 89   | -2       | 97 ± 8.0             | -2 ± 7.9             | 4 |
| 225                  | 99   | -8       | 96   | -6       | 92   | -1       | 88   | -3       | 94 ± 5.1             | -5 ± 3.0             | 4 |
| 240                  | 100  | -8       | 92   | -10      | 96   | 3        | 85   | -6       | 93 ± 6.1             | -5 ± 5.5             | 4 |
| 270                  | 99   | -9       | 91   | -11      | 93   | 0        | 76   | -15      | 90 ± 9.7             | -9 ± 6.0             | 4 |
| 300                  | 109  | 1        | 109  | 7        | 94   | 1        | 84   | -7       | 99 ± 12.1            | 1 ± 5.6              | 4 |
| 330                  | 102  | -5       | 110  | 8        | 92   | 0        | 90   | -1       | 99 ± 9.4             | 0 ± 5.6              | 4 |
| 360                  | 100  | -7       | 106  | 4        | 92   | -1       | 88   | -3       | 97 ± 8.0             | -2 ± 4.6             | 4 |
| 390                  | 95   | -13      | 98   | -4       | 93   | 1        | 82   | -9       | 92 ± 6.8             | -6 ± 5.8             | 4 |
| 420                  | 103  | -4       | 96   | -6       | 94   | 1        | 65   | -25      | 90 ± 16.7            | -9 ± 11.6            | 4 |

CONFIDENTIAL

Appendix 1.4 – Group 4, Fexinidazole 1000 mg/kg PO

QRS interval (msec)

| Time from dose (min) | 2482 |          | 2539 |          | 2552 |          | 2057 |          | Absolute Mean ± S.D. | Δ from 0 Mean ± S.D. | N |
|----------------------|------|----------|------|----------|------|----------|------|----------|----------------------|----------------------|---|
|                      | Abs. | Δ from 0 | Abs. | Δ from 0 | Abs. | Δ from 0 | Abs. | Δ from 0 |                      |                      |   |
| -60                  | 39   | 0        | 40   | 1        | 38   | 1        | 40   | 0        | 39 ± 1.1             | 0 ± 0.9              | 4 |
| -50                  | 39   | 0        | 36   | -3       | 36   | 0        | 40   | 0        | 38 ± 1.9             | -1 ± 1.5             | 4 |
| -40                  | 39   | 0        | 39   | -1       | 37   | 0        | 40   | 0        | 39 ± 1.6             | 0 ± 0.5              | 4 |
| -30                  | 39   | 0        | 40   | 1        | 36   | -1       | 41   | 1        | 39 ± 2.2             | 0 ± 0.7              | 4 |
| -20                  | 39   | 0        | 43   | 4        | 36   | -1       | 40   | 0        | 40 ± 2.8             | 1 ± 1.9              | 4 |
| -10                  | 38   | -1       | 38   | -1       | 38   | 1        | 39   | -1       | 38 ± 0.8             | 0 ± 1.0              | 4 |
| 0                    | 39   | 0        | 39   | 0        | 37   | 0        | 40   | 0        | 39 ± 1.4             | 0 ± 0.0              | 4 |
| 15                   | 37   | -2       | 42   | 3        | 35   | -2       | 40   | 0        | 38 ± 3.4             | 0 ± 2.4              | 4 |
| 30                   | 37   | -2       | 40   | 0        | 35   | -1       | 41   | 0        | 38 ± 2.5             | -1 ± 1.4             | 4 |
| 45                   | 38   | -1       | 40   | 0        | 35   | -2       | 40   | 0        | 38 ± 2.5             | -1 ± 1.1             | 4 |
| 60                   | 39   | 0        | 38   | -1       | 35   | -2       | 40   | 0        | 38 ± 2.1             | -1 ± 0.8             | 4 |
| 75                   | 38   | -1       | 42   | 2        | 36   | -1       | 41   | 1        | 39 ± 2.6             | 0 ± 1.6              | 4 |
| 90                   | 40   | 1        | 46   | 7        | 39   | 3        | 42   | 1        | 42 ± 3.2             | 3 ± 2.8              | 4 |
| 105                  | 40   | 2        | 44   | 5        | 37   | 0        | 40   | 0        | 40 ± 3.1             | 2 ± 2.4              | 4 |
| 120                  | 39   | 0        | 42   | 2        | 35   | -1       | 41   | 1        | 39 ± 2.9             | 0 ± 1.6              | 4 |
| 135                  | 40   | 1        | 44   | 5        | 37   | 0        | 39   | -1       | 40 ± 3.2             | 1 ± 2.6              | 4 |
| 150                  | 39   | 0        | 42   | 2        | 36   | 0        | 40   | 0        | 39 ± 2.4             | 1 ± 1.3              | 4 |
| 165                  | 37   | -2       | 43   | 3        | 37   | 0        | 40   | 0        | 39 ± 2.7             | 0 ± 2.2              | 4 |
| 180                  | 39   | 0        | 40   | 1        | 36   | -1       | 42   | 2        | 39 ± 2.7             | 0 ± 1.3              | 4 |
| 195                  | 38   | -1       | 40   | 1        | 37   | 0        | 41   | 1        | 39 ± 1.8             | 0 ± 0.7              | 4 |
| 210                  | 38   | -1       | 38   | -1       | 42   | 6        | 42   | 2        | 40 ± 2.3             | 1 ± 3.1              | 4 |
| 225                  | 39   | 0        | 42   | 3        | 38   | 1        | 44   | 3        | 41 ± 2.6             | 2 ± 1.5              | 4 |
| 240                  | 39   | 0        | 42   | 3        | 37   | 0        | 42   | 2        | 40 ± 2.3             | 1 ± 1.3              | 4 |
| 270                  | 40   | 1        | 41   | 1        | 37   | 0        | 40   | 0        | 39 ± 1.9             | 0 ± 0.8              | 4 |
| 300                  | 43   | 4        | 39   | 0        | 37   | 0        | 45   | 4        | 41 ± 3.5             | 2 ± 2.4              | 4 |
| 330                  | 48   | 9        | 41   | 2        | 37   | 1        | 43   | 3        | 43 ± 4.5             | 4 ± 3.8              | 4 |
| 360                  | 62   | 23       | 41   | 2        | 38   | 1        | 45   | 5        | 46 ± 10.5            | 8 ± 10.2             | 4 |
| 390                  | 43   | 4        | 42   | 2        | 38   | 1        | 43   | 3        | 41 ± 2.6             | 2 ± 1.2              | 4 |
| 420                  | 46   | 7        | 42   | 3        | 38   | 1        | 43   | 3        | 42 ± 3.6             | 3 ± 2.7              | 4 |

CONFIDENTIAL

Appendix 1.4 – Group 4, Fexinidazole 1000 mg/kg PO

RR interval (msec)

| Time from dose (min) | 2482 |          | 2539 |          | 2552 |          | 2057 |          | Absolute Mean ± S.D. | Δ from 0 Mean ± S.D. | N |
|----------------------|------|----------|------|----------|------|----------|------|----------|----------------------|----------------------|---|
|                      | Abs. | Δ from 0 | Abs. | Δ from 0 | Abs. | Δ from 0 | Abs. | Δ from 0 |                      |                      |   |
| -60                  | 616  | -294     | 355  | -437     | 510  | -120     | 543  | -186     | 506 ± 110.1          | -259 ± 138.2         | 4 |
| -50                  | 1134 | 224      | 1032 | 241      | 644  | 13       | 960  | 231      | 943 ± 211.3          | 177 ± 109.5          | 4 |
| -40                  | 1086 | 176      | 847  | 55       | 624  | -7       | 871  | 142      | 857 ± 188.9          | 92 ± 83.0            | 4 |
| -30                  | 793  | -117     | 953  | 161      | 701  | 70       | 708  | -21      | 789 ± 117.3          | 23 ± 119.6           | 4 |
| -20                  | 959  | 48       | 857  | 66       | 621  | -9       | 647  | -82      | 771 ± 163.7          | 6 ± 66.7             | 4 |
| -10                  | 873  | -37      | 705  | -87      | 684  | 53       | 645  | -84      | 727 ± 100.5          | -39 ± 65.3           | 4 |
| 0                    | 910  | 0        | 791  | 0        | 631  | 0        | 729  | 0        | 765 ± 117.0          | 0 ± 0.0              | 4 |
| 15                   | 531  | -379     | 425  | -366     | 499  | -132     | 612  | -117     | 517 ± 77.3           | -249 ± 143.4         | 4 |
| 30                   | 513  | -397     | 352  | -440     | 383  | -248     | 597  | -132     | 461 ± 114.5          | -304 ± 141.2         | 4 |
| 45                   | 667  | -243     | 280  | -511     | 335  | -296     | 681  | -48      | 491 ± 213.0          | -275 ± 190.7         | 4 |
| 60                   | 776  | -134     | 583  | -209     | 468  | -163     | 535  | -194     | 590 ± 132.4          | -175 ± 33.2          | 4 |
| 75                   | 469  | -441     | 507  | -285     | 510  | -121     | 507  | -222     | 498 ± 19.5           | -267 ± 134.2         | 4 |
| 90                   | 721  | -190     | 606  | -186     | 433  | -198     | 730  | 0        | 622 ± 138.4          | -143 ± 96.0          | 4 |
| 105                  | 704  | -206     | 665  | -127     | 546  | -84      | 693  | -36      | 652 ± 72.4           | -113 ± 72.1          | 4 |
| 120                  | 797  | -113     | 838  | 47       | 512  | -119     | 779  | 50       | 731 ± 148.6          | -34 ± 95.1           | 4 |
| 135                  | 748  | -162     | 720  | -72      | 525  | -106     | 524  | -205     | 629 ± 121.6          | -136 ± 59.1          | 4 |
| 150                  | 674  | -236     | 680  | -111     | 415  | -216     | 561  | -168     | 583 ± 124.4          | -183 ± 55.9          | 4 |
| 165                  | 532  | -378     | 660  | -131     | 548  | -83      | 593  | -136     | 583 ± 57.5           | -182 ± 132.9         | 4 |
| 180                  | 692  | -218     | 593  | -198     | 451  | -179     | 656  | -73      | 598 ± 106.0          | -167 ± 64.6          | 4 |
| 195                  | 591  | -319     | 514  | -278     | 444  | -187     | 567  | -162     | 529 ± 65.2           | -237 ± 74.2          | 4 |
| 210                  | 588  | -323     | 605  | -187     | 408  | -223     | 579  | -150     | 545 ± 91.8           | -221 ± 74.2          | 4 |
| 225                  | 523  | -387     | 545  | -246     | 521  | -110     | 666  | -63      | 564 ± 68.8           | -202 ± 145.8         | 4 |
| 240                  | 592  | -319     | 520  | -271     | 500  | -130     | 431  | -298     | 511 ± 65.9           | -254 ± 84.9          | 4 |
| 270                  | 604  | -306     | 455  | -336     | 418  | -213     | 393  | -336     | 468 ± 94.2           | -298 ± 58.4          | 4 |
| 300                  | 798  | -112     | 747  | -45      | 462  | -168     | 671  | -58      | 670 ± 147.6          | -96 ± 56.4           | 4 |
| 330                  | 731  | -179     | 758  | -34      | 423  | -208     | 532  | -197     | 611 ± 160.7          | -154 ± 81.2          | 4 |
| 360                  | 790  | -120     | 903  | 111      | 554  | -77      | 600  | -129     | 712 ± 163.0          | -54 ± 112.2          | 4 |
| 390                  | 612  | -298     | 666  | -125     | 504  | -126     | 718  | -11      | 625 ± 91.5           | -140 ± 118.6         | 4 |
| 420                  | 863  | -47      | 571  | -221     | 532  | -98      | 351  | -378     | 579 ± 212.2          | -186 ± 147.3         | 4 |

CONFIDENTIAL

Appendix 1.4 – Group 4, Fexinidazole 1000 mg/kg PO

Body temperature (°C)

| Time from dose (min) | 2482 |          | 2539 |          | 2552 |          | 2057 |          | Absolute Mean ± S.D. | Δ from 0 Mean ± S.D. | N |
|----------------------|------|----------|------|----------|------|----------|------|----------|----------------------|----------------------|---|
|                      | Abs. | Δ from 0 | Abs. | Δ from 0 | Abs. | Δ from 0 | Abs. | Δ from 0 |                      |                      |   |
| -60                  | 37.5 | -0.2     | 37.5 | 0.0      | 38.4 | -0.2     | 37.4 | -0.2     | 37.7 ± 0.44          | -0.1 ± 0.1           | 4 |
| -50                  | 37.7 | -0.1     | 37.5 | -0.1     | 38.4 | -0.1     | 37.5 | -0.1     | 37.8 ± 0.44          | -0.1 ± 0.0           | 4 |
| -40                  | 37.7 | 0.0      | 37.2 | -0.3     | 38.5 | -0.1     | 37.7 | 0.0      | 37.8 ± 0.51          | -0.1 ± 0.2           | 4 |
| -30                  | 37.8 | 0.0      | 37.5 | 0.0      | 38.6 | 0.0      | 37.8 | 0.2      | 37.9 ± 0.44          | 0.1 ± 0.1            | 4 |
| -20                  | 37.9 | 0.1      | 37.7 | 0.1      | 38.7 | 0.1      | 37.8 | 0.1      | 38.0 ± 0.45          | 0.1 ± 0.0            | 4 |
| -10                  | 37.9 | 0.2      | 37.8 | 0.3      | 38.7 | 0.2      | 37.5 | -0.1     | 38.0 ± 0.49          | 0.1 ± 0.1            | 4 |
| 0                    | 37.7 | 0.0      | 37.6 | 0.0      | 38.5 | 0.0      | 37.6 | 0.0      | 37.9 ± 0.45          | 0.0 ± 0.0            | 4 |
| 15                   | 39.2 | 1.4      | 38.9 | 1.4      | 38.8 | 0.2      | 38.2 | 0.6      | 38.8 ± 0.40          | 0.9 ± 0.6            | 4 |
| 30                   | 39.2 | 1.5      | 38.8 | 1.2      | 38.9 | 0.4      | 38.2 | 0.6      | 38.8 ± 0.41          | 0.9 ± 0.5            | 4 |
| 45                   | 39.0 | 1.2      | 38.7 | 1.1      | 39.1 | 0.6      | 38.0 | 0.4      | 38.7 ± 0.49          | 0.8 ± 0.4            | 4 |
| 60                   | 38.9 | 1.1      | 38.7 | 1.1      | 39.2 | 0.7      | 38.1 | 0.5      | 38.7 ± 0.48          | 0.9 ± 0.3            | 4 |
| 75                   | 38.6 | 0.8      | 38.5 | 1.0      | 39.3 | 0.7      | 37.9 | 0.3      | 38.6 ± 0.56          | 0.7 ± 0.3            | 4 |
| 90                   | 38.8 | 1.0      | 38.6 | 1.0      | 39.3 | 0.8      | 38.2 | 0.5      | 38.7 ± 0.49          | 0.8 ± 0.2            | 4 |
| 105                  | 38.7 | 1.0      | 38.4 | 0.8      | 39.4 | 0.9      | 38.1 | 0.5      | 38.7 ± 0.56          | 0.8 ± 0.2            | 4 |
| 120                  | 38.7 | 0.9      | 38.2 | 0.7      | 39.4 | 0.9      | 38.2 | 0.5      | 38.6 ± 0.59          | 0.8 ± 0.2            | 4 |
| 135                  | 38.5 | 0.7      | 38.3 | 0.7      | 39.4 | 0.9      | 37.8 | 0.2      | 38.5 ± 0.67          | 0.6 ± 0.3            | 4 |
| 150                  | 38.6 | 0.8      | 38.3 | 0.7      | 39.4 | 0.9      | 38.1 | 0.5      | 38.6 ± 0.58          | 0.7 ± 0.2            | 4 |
| 165                  | 38.7 | 1.0      | 38.3 | 0.7      | 39.5 | 1.0      | 38.4 | 0.8      | 38.7 ± 0.56          | 0.9 ± 0.1            | 4 |
| 180                  | 38.8 | 1.0      | 38.4 | 0.8      | 39.6 | 1.0      | 38.5 | 0.9      | 38.8 ± 0.52          | 1.0 ± 0.1            | 4 |
| 195                  | 38.7 | 1.0      | 38.5 | 0.9      | 39.6 | 1.1      | 38.4 | 0.8      | 38.8 ± 0.56          | 0.9 ± 0.1            | 4 |
| 210                  | 38.7 | 0.9      | 38.7 | 1.2      | 39.6 | 1.0      | 38.4 | 0.8      | 38.8 ± 0.51          | 1.0 ± 0.2            | 4 |
| 225                  | 38.6 | 0.9      | 38.6 | 1.1      | 39.5 | 1.0      | 38.4 | 0.8      | 38.8 ± 0.50          | 0.9 ± 0.1            | 4 |
| 240                  | 38.8 | 1.0      | 38.9 | 1.3      | 39.5 | 1.0      | 38.5 | 0.9      | 38.9 ± 0.41          | 1.0 ± 0.2            | 4 |
| 270                  | 38.5 | 0.8      | 38.7 | 1.1      | 39.4 | 0.9      | 38.2 | 0.5      | 38.7 ± 0.53          | 0.8 ± 0.2            | 4 |
| 300                  | 38.1 | 0.4      | 38.7 | 1.2      | 39.4 | 0.9      | 38.0 | 0.4      | 38.6 ± 0.65          | 0.7 ± 0.4            | 4 |
| 330                  | 37.9 | 0.2      | 38.5 | 0.9      | 39.0 | 0.5      | 38.4 | 0.8      | 38.4 ± 0.44          | 0.6 ± 0.3            | 4 |
| 360                  | 38.3 | 0.6      | 38.2 | 0.6      | 38.8 | 0.3      | 38.7 | 1.1      | 38.5 ± 0.29          | 0.6 ± 0.3            | 4 |
| 390                  | 38.3 | 0.6      | 38.4 | 0.9      | 38.9 | 0.4      | 38.4 | 0.8      | 38.5 ± 0.24          | 0.7 ± 0.2            | 4 |
| 420                  | 38.1 | 0.3      | 38.4 | 0.9      | 38.9 | 0.4      | 38.4 | 0.8      | 38.5 ± 0.35          | 0.6 ± 0.3            | 4 |

## ***Appendix 2 Protocol and Amendments***



### ***Appendix 3 Pharmacy Certification***

CONFIDENTIAL

PHARMACY CERTIFICATION

Pharm. Cert. 0506-2007

**TEST ARTICLE:** Fexinidazole  
**STUDY NUMBER:** 0506-2007  
**NOTEBOOK NUMBERS:** F0094 and F0115

**DOCUMENTATION ENCLOSED IN THE NOTEBOOK:**

- A. Analysis certificate dated December 18, 2007 issued by Orgasynth Industries for Fexinidazole test item, raw material, Batch No. 3168-07-01/O
- B. Material safety data sheet issued by Orgasynth Industries for Fexinidazole
- C. Certificate of Analysis issued by Sigma-Aldrich for Methylcellulose 400 cP, raw material, Lot No. 125K0196
- D. Certificate of Analysis issued by Sigma-Aldrich for Tween® 80, raw material, Lot No. 1324202
- E. Label's photocopy of Acqua per preparazioni iniettabili (Bieffe Medital S.p.A.), raw material, Lot No. 07K1503
- F. Copy of request cards of test item

**ANALYTICAL DOCUMENTATION:**

Requests and Analytical Results issued by Accelera/ADMET/Preclinical Formulation and Accelera/DMPK&ART/Bioanalysis and Analytical Control

**MATERIALS USED FOR THE STUDY:**

- 1. Fexinidazole test item, raw material, Batch No. 3168-07-01/O
- 2. Methylcellulose 400 cP, raw material, Lot No. 125K0196
- 3. Tween® 80, raw material, Lot No. 1324202
- 4. Acqua per preparazioni iniettabili, raw material, Lot No. 07K1503

**PREPARATIONS:**

Prepare suspension of Fexinidazole test item, raw material, Lot No. 3168-07-01/O in the vehicle (5% Tween® 80 in 0.5% Methylcellulose 400 cP solution) at the concentration of 10 mg/mL, 30 mg/mL and 100 mg/mL

**CONCENTRATION CHECKS: (ACCURACY LIMITS: ± 10% OF LABELED AMOUNT)**

| Fexinidazole suspensions | Preparation date            | Request No. | % of L.A. |
|--------------------------|-----------------------------|-------------|-----------|
| 10 mg/mL - TOP           | 26 <sup>th</sup> March 2008 | 200800092   | 101.33    |
| 10 mg/mL - MIDDLE        | 26 <sup>th</sup> March 2008 | 200800093   | 102.67    |
| 10 mg/mL - BOTTOM        | 26 <sup>th</sup> March 2008 | 200800094   | 100.16    |
| 30 mg/mL - TOP           | 28 <sup>th</sup> March 2008 | 200800095   | 102.03    |
| 30 mg/mL - MIDDLE        | 28 <sup>th</sup> March 2008 | 200800096   | 100.86    |
| 30 mg/mL - BOTTOM        | 28 <sup>th</sup> March 2008 | 200800097   | 100.41    |
| 100 mg/mL - TOP          | 3 <sup>rd</sup> April 2008  | 200800122   | 96.90     |
| 100 mg/mL - MIDDLE       | 3 <sup>rd</sup> April 2008  | 200800123   | 101.06    |
| 100 mg/mL - BOTTOM       | 3 <sup>rd</sup> April 2008  | 200800124   | 99.95     |

**STABILITY:**

**Fexinidazole test article:**

Expire date October 2008 for Fexinidazole, test item, raw material, Lot No. 3168-07-01/O if stored at room temperature protected from light.

**Fexinidazole solutions:**

Stability data indicate that Fexinidazole suspensions in the vehicle (5% Tween® 80 in 0.5% Methylcellulose 400 cP solution) in the range 0.5-100 mg/mL are stable up to 7 days at room temperature and 14 days at +4°C (Nerviano MS 0293-2007-R)

20<sup>th</sup> May 2008
