# Supplementary material for: Fexinidazole – A New Oral Nitroimidazole Drug Candidate Entering Clinical Development for the Treatment of Sleeping Sickness
Source: PubMed Central journal article supplement (PMC3006138; doi:10.1371/journal.pntd.0000923), 2010-12-21
Supplement: pntd.0000923.s016.pdf [file pntd.0000923.s016.pdf]

## **Fexinidazole: Effects on Respiratory Parameters in the Unrestrained Conscious Male Rat after Oral Administration**

|                              |                |
|------------------------------|----------------|
| Product Name :               | Fexinidazole   |
| Study Number:                | 0509-2007      |
| Study Director/Author:       |                |
| Sponsor Reference Study No.: | Not Applicable |
| Status:                      | Final          |

## SUMMARY

The purpose of this study (0509-2007) was to investigate the potential effects of fexinidazole, an agent under investigation for the treatment of the Human African trypanosomiasis (HAT), on the respiratory function in the conscious unrestrained rats following a single oral administration.

Groups of eight male rats were given a single dose of fexinidazole at dosages of 0 (vehicle), 100, 300 or 1000 mg/kg.

The effect of treatment on respiratory function was assessed by placing the animals in individual plethysmographic chambers and recording respiratory parameters for 4 hours after treatment.

Respiratory parameters were not affected by oral administration of fexinidazole at any of the doses tested and were relatively stable throughout the 4-hour recording period following treatment, with the exception of time point changes in a few parameters which were scattered among dose groups and were mainly due to changes in individual animals.

In conclusion, oral administration of fexinidazole to male rats at doses of 100, 300 and 1000 mg/kg did not have any effect on respiratory parameters. The No-Observed Effect Level (NOEL) for the test item can therefore be defined at 1000 mg/kg.

**TABLE OF CONTENTS**

|                                                     |    |
|-----------------------------------------------------|----|
| 1. INTRODUCTION AND OBJECTIVES .....                | 8  |
| 2. STUDY SPONSOR .....                              | 8  |
| 3. TEST FACILITY .....                              | 8  |
| 4. REGULATORY REQUIREMENTS .....                    | 8  |
| 5. SCHEDULE .....                                   | 8  |
| 6. MATERIALS AND METHODS .....                      | 9  |
| 6.1. Test and Control Items .....                   | 9  |
| 6.1.1. Test Item .....                              | 9  |
| 6.1.2. Vehicle/Control Item .....                   | 9  |
| 6.1.3. Test Formulation .....                       | 9  |
| 6.1.4. Test Formulation Analyses .....              | 9  |
| 6.2. Test System .....                              | 10 |
| 6.2.1. Identification .....                         | 10 |
| 6.2.2. Husbandry and Environmental Conditions ..... | 10 |
| 6.3. Experimental Design .....                      | 11 |
| 6.3.1. Experimental Groups .....                    | 11 |
| 6.3.2. Allocation/Randomization .....               | 11 |
| 6.3.3. Dose Administration .....                    | 11 |
| 6.3.4. Dose Justification .....                     | 11 |
| 6.4. Experimental procedure .....                   | 12 |
| 6.4.1. Deviations from Protocol .....               | 12 |
| 7. ARCHIVING .....                                  | 13 |
| 8. STUDY PERSONNEL .....                            | 13 |
| 9. RESULTS .....                                    | 13 |
| 10. CONCLUSIONS .....                               | 14 |
| 11. FIGURES .....                                   | 15 |

## APPENDICES

### Appendix 1. Study Data Listings

Appendix 1.1. Vehicle

Appendix 1.2. Fexinidazole, 100 mg/kg

Appendix 1.3. Fexinidazole, 300 mg/kg

Appendix 1.4. Fexinidazole, 1000 mg/kg

### Appendix 2. Protocol and Amendment

### Appendix 3. Pharmacy Certification

## 1. INTRODUCTION AND OBJECTIVES

Fexinidazole is a 5-nitroimidazole derivative, biologically active against *Trypanosoma* parasites (*T.b.rhodesiense* and *T.b. brucei*), under investigation for the treatment of the Human African trypanosomiasis (HAT), known as sleeping sickness. The purpose of this study (0509-2007) was to determine the potential adverse effects of the test item on the respiratory function in the conscious unrestrained rats following a single oral administration.

## 2. STUDY SPONSOR

Drugs for Neglected Diseases *initiative* (DNDi)  
1, Place St Gervais  
CH-1201 Geneva  
Switzerland

## 3. TEST FACILITY

Accelera

## 4. REGULATORY REQUIREMENTS

This study was conducted in compliance with:

- Decreto Legislativo 2 Marzo 2007, No. 50;
- Organisation for Economic Co-operation and Development (OECD) Principles of Good Laboratory Practice (GLP) (as revised in 1997).

The methods employed in this study were those described in the "Standard Operating Procedures" of the laboratories involved.

## 5. SCHEDULE

|                                                              |                               |
|--------------------------------------------------------------|-------------------------------|
| Experimental Start Date (randomization of animals)           | 4 <sup>th</sup> February 2008 |
| First day of treatment (first 2 rats/group)                  | 5 <sup>th</sup> February 2008 |
| Last day of treatment (last 2 rats/group)                    | 8 <sup>th</sup> February 2008 |
| Experimental Completion Date (end of experimental recording) | 8 <sup>th</sup> February 2008 |

## 6. MATERIALS AND METHODS

### 6.1. Test and Control Items

#### 6.1.1. Test Item

|                              |                                                                                                                                      |
|------------------------------|--------------------------------------------------------------------------------------------------------------------------------------|
| Identification               | Fexinidazole                                                                                                                         |
| Lot/Batch Number             | 3168-07-01/O                                                                                                                         |
| Purity and Expiry            | 100.2%, October 2008                                                                                                                 |
| Storage Conditions           | Room temperature, protected from light                                                                                               |
| Source and Manufacturer      | Centipharm (formerly Orgasynth, as communicated by the Sponsor)                                                                      |
| Special Handling Precautions | Usual protection of all personnel conducting the study (mask, gloves and eyeglasses), according to MSDS (Material Safety Data Sheet) |

##### 6.1.1.1. Deviations from Protocol

In the protocol, the specification “protected from light” (reported on the MSDS) was inadvertently omitted. The test item has, however, been stored protected from light as requested.

#### 6.1.2. Vehicle/Control Item

|                         |                                                        |               |
|-------------------------|--------------------------------------------------------|---------------|
| Identification          | 5% Tween 80 in 0.5% Methyl cellulose 400 cP (Methocel) |               |
| Lot/Batch Number        | Tween 80                                               | 1239316       |
|                         | Methyl cellulose 400 cP                                | 105K0074      |
| Expiry                  | Tween 80                                               | November 2010 |
|                         | Methyl cellulose 400 cP                                | October 2008  |
| Storage Conditions      | Room temperature                                       |               |
| Source and Manufacturer | Tween 80                                               | Sigma-Aldrich |
|                         | Methyl cellulose 400 cP                                | Sigma-Aldrich |
| Method of Preparation   | On file at Accelera/ADMET/Preclinical Formulation      |               |

#### 6.1.3. Test Formulation

|                          |                                                           |
|--------------------------|-----------------------------------------------------------|
| Type of Formulation      | Suspension in vehicle                                     |
| Method of Preparation    | On file at Accelera/ADMET/Preclinical formulation         |
| Frequency of Preparation | Suspensions were prepared according to the stability data |
| Dose Concentrations      | 5, 15, 50 mg/mL                                           |
| Storage Conditions       | Room temperature in the dark                              |
| Source and Manufacturer  | Accelera/ADMET/Preclinical Formulation                    |

#### 6.1.4. Test Formulation Analyses

##### 6.1.4.1. Concentration and Homogeneity

Samples (top-middle-bottom, 5 mL each) of each dose suspension were collected under

stirring for concentration and homogeneity check test of fexinidazole; 10 mL were taken also from the vehicle. After collection, samples were directly transferred at +4°C to Bioanalysis & Analytical Control for analysis. The analyses were performed using a validated HPLC-UV method.

All values were found to be within acceptable limits (see Appendix 3).

#### 6.1.4.2. Stability

Stability data indicate that fexinidazole suspensions in 5% Tween 80 in 0.5% methyl cellulose 400 cP (Methocel) in the range 0.5 - 100 mg/mL are stable up to 7 days at room temperature and 14 days at +4°C (NervianoMS 0293-2007-R).

### 6.2. Test System

|                                  |                                                                                                                                                                                                                 |
|----------------------------------|-----------------------------------------------------------------------------------------------------------------------------------------------------------------------------------------------------------------|
| Species/Strain and Source        | Rat/Crl:CD(SD)BR, Charles River Labs Italia S.p.A. (Calco, Lecco)                                                                                                                                               |
| Justification of Species and Sex | The rat has been used extensively in safety studies and a large amount of biological data is available. Only males were used since no significant gender-related differences in systemic exposure are expected. |
| Age                              | About 8 weeks on the day of dosing                                                                                                                                                                              |
| Weight                           | 255-313 g on the day of dosing                                                                                                                                                                                  |
| Acclimation                      | At least 6 days                                                                                                                                                                                                 |
| Selection Criteria               | Body weight and physical examination                                                                                                                                                                            |

#### 6.2.1. Identification

| Test Group | Color Code | Animal Identification No.                             |
|------------|------------|-------------------------------------------------------|
| 1          | White      | 2833 - 2834 - 2835 - 2836 - 2837 - 2838 - 2839 - 2840 |
| 2          | Yellow     | 2841 - 2842 - 2843 - 2844 - 2845 - 2846 - 2847 - 2848 |
| 3          | Green      | 2849 - 2850 - 2851 - 2852 - 2853 - 2854 - 2855 - 2856 |
| 4          | Red        | 2857 - 2858 - 2859 - 2860 - 2861 - 2862 - 2863 - 2864 |

Each animal was identified with a metal ear tag bearing a unique serial number. A color-coded cage card was affixed to each study animal's cage, indicating the study number, animal number, and dose level.

#### 6.2.2. Husbandry and Environmental Conditions

|             |                                                                        |
|-------------|------------------------------------------------------------------------|
| Room        | #120 (acclimatization), #114 (experiments) Blg 64 rodent facility      |
| Caging      | Makrolon cages (59x38.5x20 cm, Tecniplast Gazzada, Buguggiate, Varese) |
| Bedding     | 700/2000 sawdust bedding (L.G. Packing Wood S.r.l., Condove, Turin).   |
| Temperature | 21.5 ± 1.5°C                                                           |
| Humidity    | 55 ± 15%                                                               |
| Lighting    | Approximate 12-hour light, 12-hour dark cycle.                         |
| Ventilation | At least 20 room air changes per hour                                  |
| Water       | Municipal main water in bottles                                        |
| Diet        | 4RF21GLP pellets, (Mucedola s.r.l., Settimo Milanese, Milan)           |

Nerviano Medical Sciences

Page 10 of 20

Environmental conditions were continuously monitored and recordings were retained. Release of each lot of feed (and bedding) by the manufacturers is based on analysis of composite samples of each lot, which has met specifications set by the manufacturers. Water is periodically analyzed for chemical and microbial impurities. No contaminants have been identified in the food or water (or bedding), which are expected to interfere with the results or conclusions of this study.

All the above environmental conditions, as well as all the procedures adopted throughout the study for housing and handling the animals, were in strict compliance with EU and Italian Guidelines for Laboratory Animal Welfare.

### 6.3. Experimental Design

#### 6.3.1. Experimental Groups

| Exp. Session | Treatment <sup>(a)</sup> | Dose (mg/kg) | Number of Animals/Group (Males only) |
|--------------|--------------------------|--------------|--------------------------------------|
| 1            | Vehicle                  | 0 (vehicle)  | 8                                    |
| 2            | Fexinidazole             | 100          | 8                                    |
| 3            | Fexinidazole             | 300          | 8                                    |
| 4            | Fexinidazole             | 1000         | 8                                    |

(a) Two animals/group were dosed each day of study.

#### 6.3.2. Allocation/Randomization

The animals were selected and distributed into experimental groups using random number tables (Fisher and Yates).

#### 6.3.3. Dose Administration

|                  |                      |
|------------------|----------------------|
| Route and Method | Oral, gastric gavage |
| Duration         | Single dose          |
| Frequency        | Once                 |
| Volume           | 20 mL/kg             |
| Rate             | Bolus                |

Dosage volumes were adjusted to the individual animal body weights recorded on the day of dosing.

#### 6.3.4. Dose Justification

Doses of 100, 300 and 1000 mg/kg of fexinidazole were selected based on the results of a repeated (7-day) toxicity study in the same species (0339-2007). In this study, the top dose of 2000 mg/kg was well tolerated and did not cause any meaningful toxicological change. On the other hand, plasma levels determined as part of a 3-day toxicity study (study 0513-2007) showed that systemic exposure (both in terms of C<sub>max</sub> and AUC) did not increase when the dose went from 500 to 1000 mg/kg/day.



The oral route is that intended for clinical administration.

## 6.4. Experimental procedure

On the day of dosing, animals were placed in individual plethysmographic chambers. After an acclimation period of at least 1 hour, and once respiratory parameters had stabilized, recording of respiratory signals was started and basal data were recorded for at least 30 minutes. Animals were taken from the chambers, orally dosed and placed again in the chambers for at least 4 hours.

Respiratory parameters were acquired continuously at the sampling frequency of 500 Hz by Notocord HEM 3.4 software and were extracted, following visual inspection, as the average value of 6-second recordings every 5 minutes. If the signal in the 6-second recording to be extracted was deemed not to be of good quality, the extraction zone was moved forward or backward for a maximum of 150 seconds. In case the quality of the signal did not improve, the time point was not extracted. Basal values were calculated as the mean of values extracted every 5 minutes from 30 to 10 minutes before treatment. After treatment, values were extracted every 30 minutes up to 4 hours. The following parameters were calculated from each respiratory cycle:

- Respiratory rate (f, breath per minutes)
- Peak inspiration flow (PIF, mL/s)
- Peak expiration flow (PEF, mL/s)
- Inspiration time (IT, msec)
- Expiration time (ET, msec)
- Relaxation time (RT, msec)
- Tidal volume (TV, mL/kg)
- Minute volume (MV, mL/kg/min calculated as  $TV * f$ )
- Enhanced Pause (Penh, calculated as  $((ET/RT)-1) * (PEF/PIF)$ )

Body weight (grams) was recorded on the day of treatment for calculation of dose volumes and for calculation of TV and MV per kg of body weight. It is not reported here but it is archived with the study file.

At the end of the experiment animals were euthanized by exposure to  $CO_2/O_2$ .

### 6.4.1. Deviations from Protocol

Some data points are not available due to unreadable waveforms (probably caused by movements or sniffing of the animals). In such cases, data in Appendix 1 are reported as “-“. The following table summarizes all instances in which data are not available:

| Treatment                | Animal No. | Time from dosing     |
|--------------------------|------------|----------------------|
| Vehicle                  | 2833       | 210 min              |
|                          | 2837       | 30 min               |
| Fexinidazole, 100 mg/kg  | 2842       | 60 and 210 min       |
| Fexinidazole, 300 mg/kg  | 2852       | 90 min               |
|                          | 2856       | 210 min              |
| Fexinidazole, 1000 mg/kg | 2858       | 120, 150 and 180 min |
|                          | 2861       | -25, -20 and -10 min |

However, the lack of these data is deemed not to have any influence on the interpretation of the results of the study.

## 7. ARCHIVING

The original protocol, all protocol amendments, all raw data, supporting documents, and specimens produced at the Test Facility, and the final report with original signatures were filed in the Archives of Accelera, Nerviano Medical Sciences S.r.l., Nerviano (Italy), where they will be kept for the period of time agreed with the Sponsor (at least 3 years) after which the Sponsor will be contacted for instructions regarding dispatch or disposal of the material.

A copy of the protocol, the report with original signatures, a reserve sample and all relevant original documentation of the test item were filed by the Sponsor.

## 8. STUDY PERSONNEL

|  |  |
|--|--|
|  |  |
|  |  |
|  |  |
|  |  |
|  |  |
|  |  |
|  |  |
|  |  |
|  |  |
|  |  |

## 9. RESULTS

Respiratory parameters were not affected by oral administration of fexinidazole at any of the doses tested and were relatively stable throughout the 4-hour recording period following treatment. Some decreases in peak inspiratory flow (PIF) were observed from 120 minutes after treatment, but they were scattered among dose groups and were mainly due to time

point changes observed in individual animals (in group 3, fexinidazole 300 mg/kg, animals no. 2850 and 2852 at 180 minutes; in group 4, fexinidazole 1000 mg/kg, animal no. 2863 at 120 minutes and animal no. 2861 at several time points). Enhanced pause (Penh) values also showed some changes, but these were again scattered throughout the experimental period and the dose groups, therefore they are not considered related to the treatment.

## 10. CONCLUSIONS

Oral administration of fexinidazole to male rats at doses of 100, 300 and 1000 mg/kg did not have any effect on respiratory parameters. The No-Observed-Effect-Level (NOEL) for the test item can therefore be defined at 1000 mg/kg.

## 11. FIGURES

Figure 1 – Tidal volume

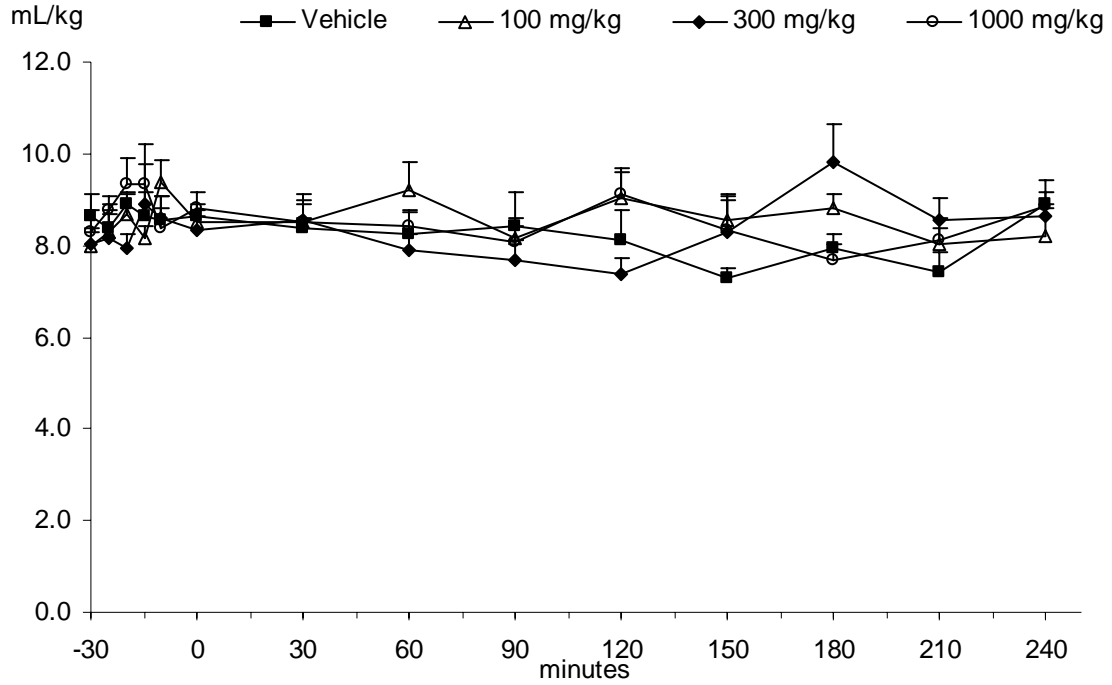

Figure 2 – Minute volume

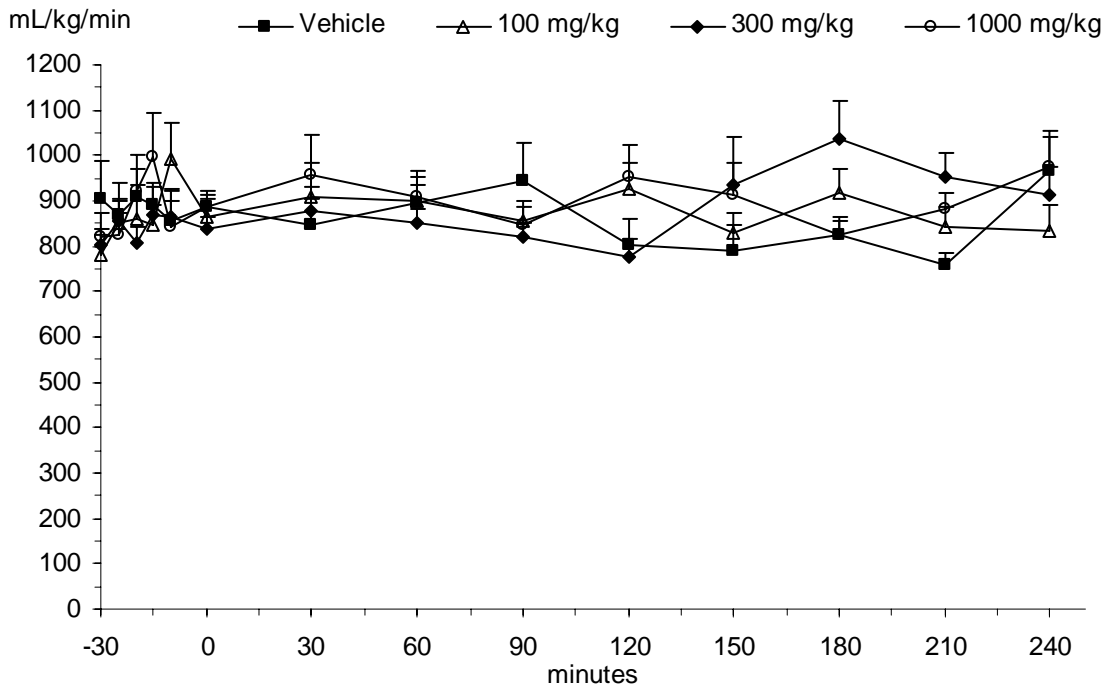

Figure 3 – Peak inspiration flow

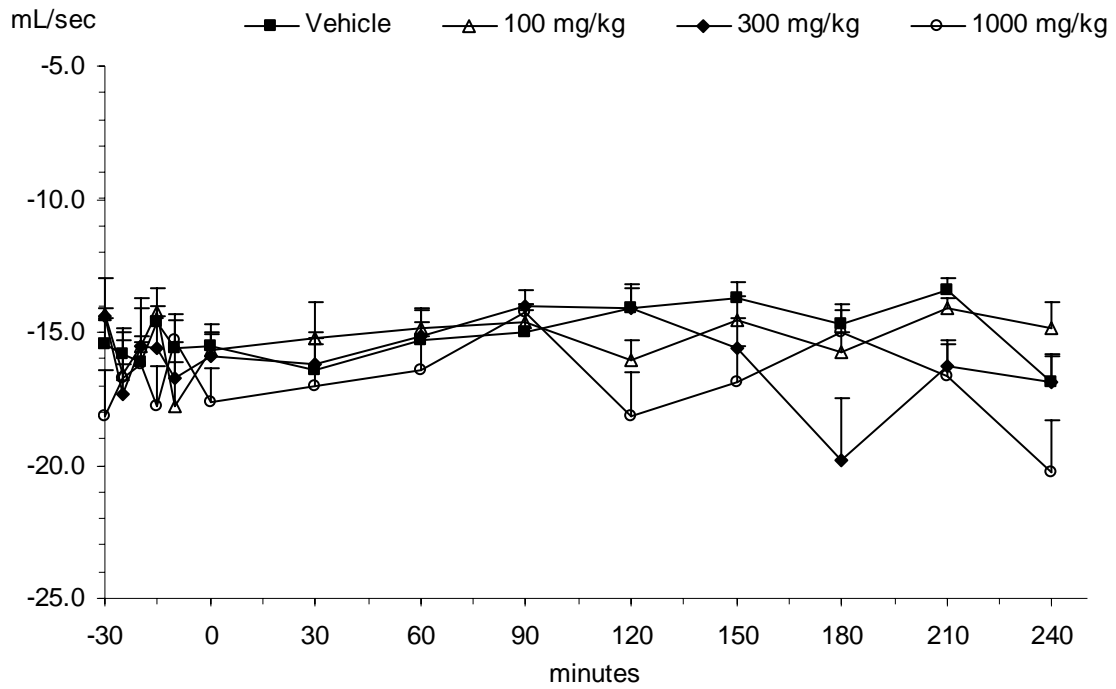

Figure 4 – Peak expiration flow

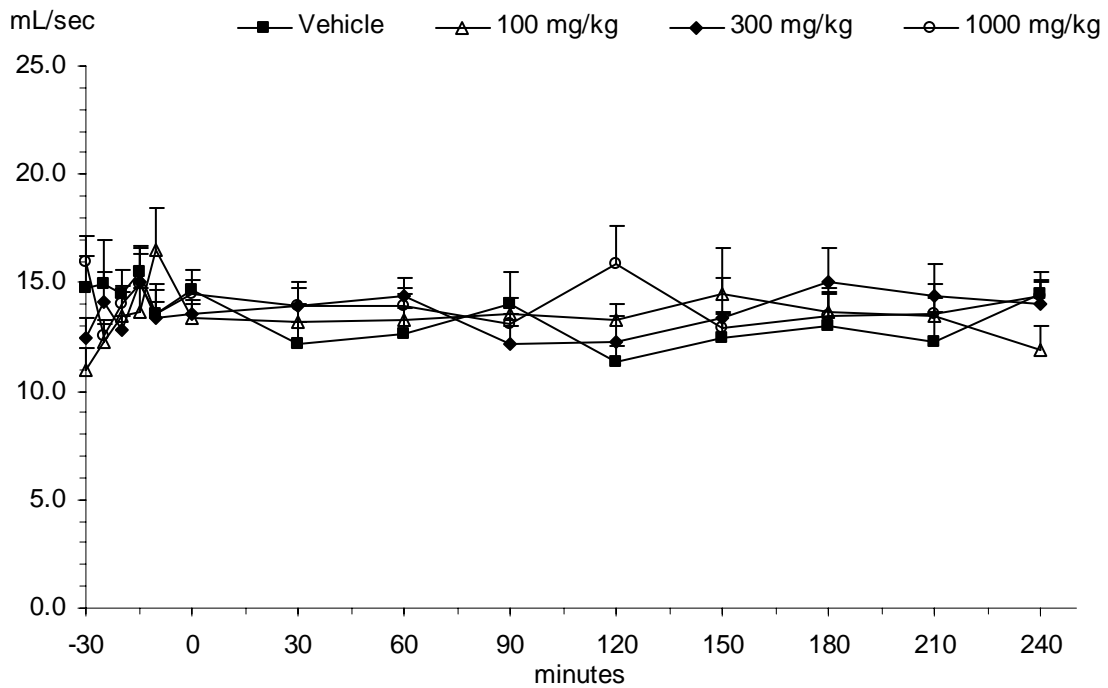

Figure 5 – Inspiration time

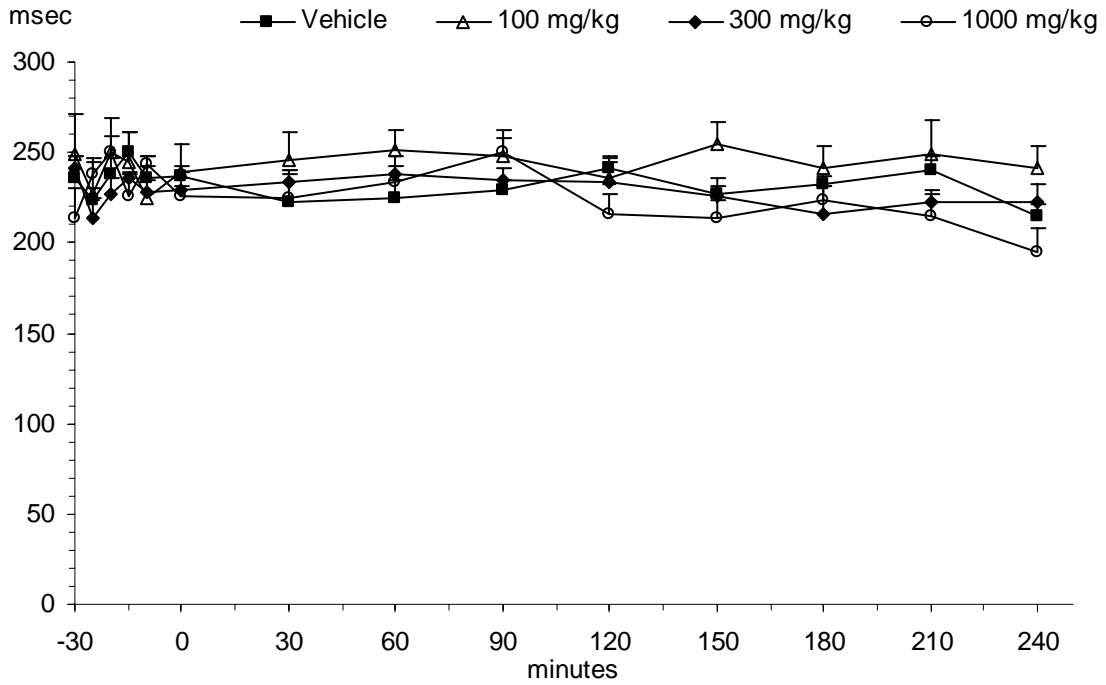

Figure 6 - Expiration time

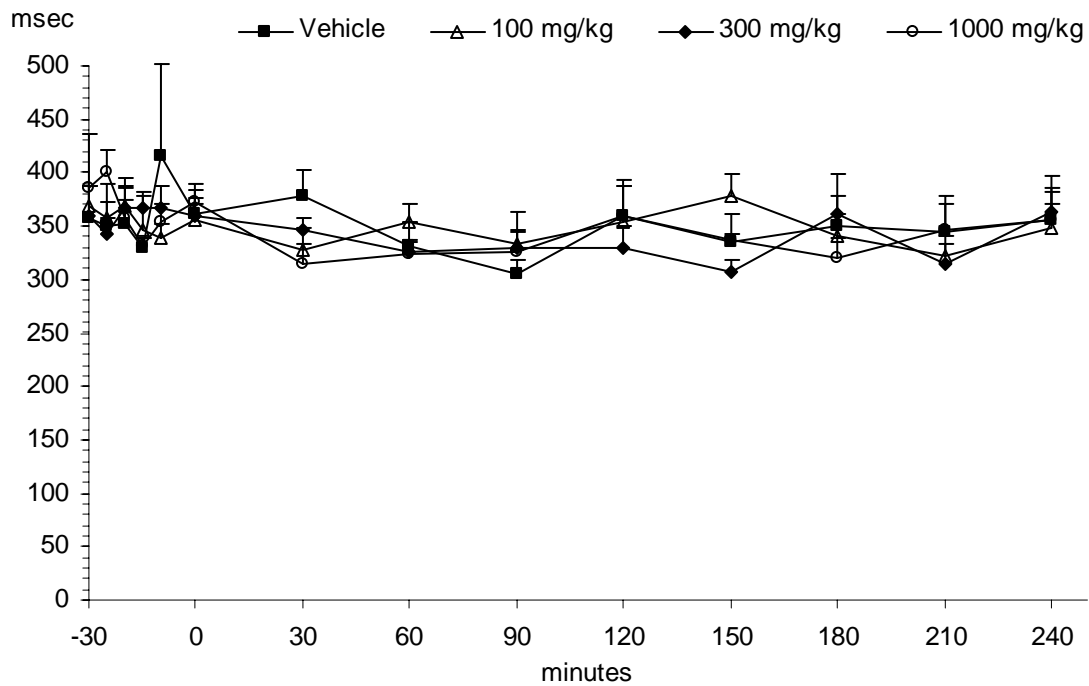

Figure 7 – Relaxation time

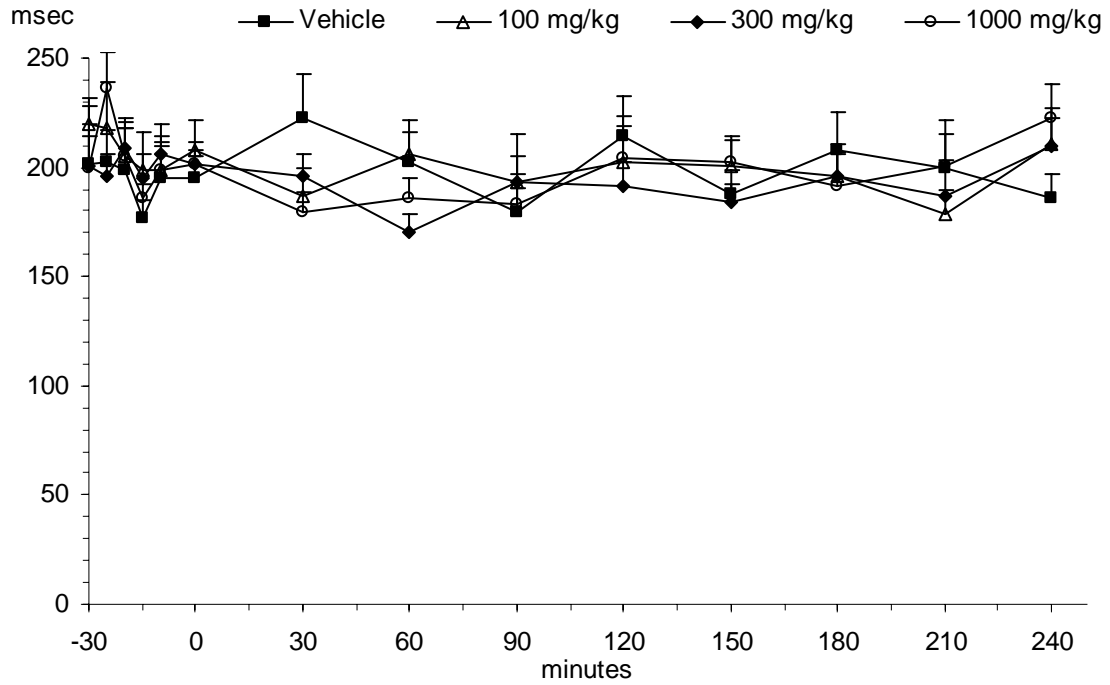

Figure 8 – Respiratory rate

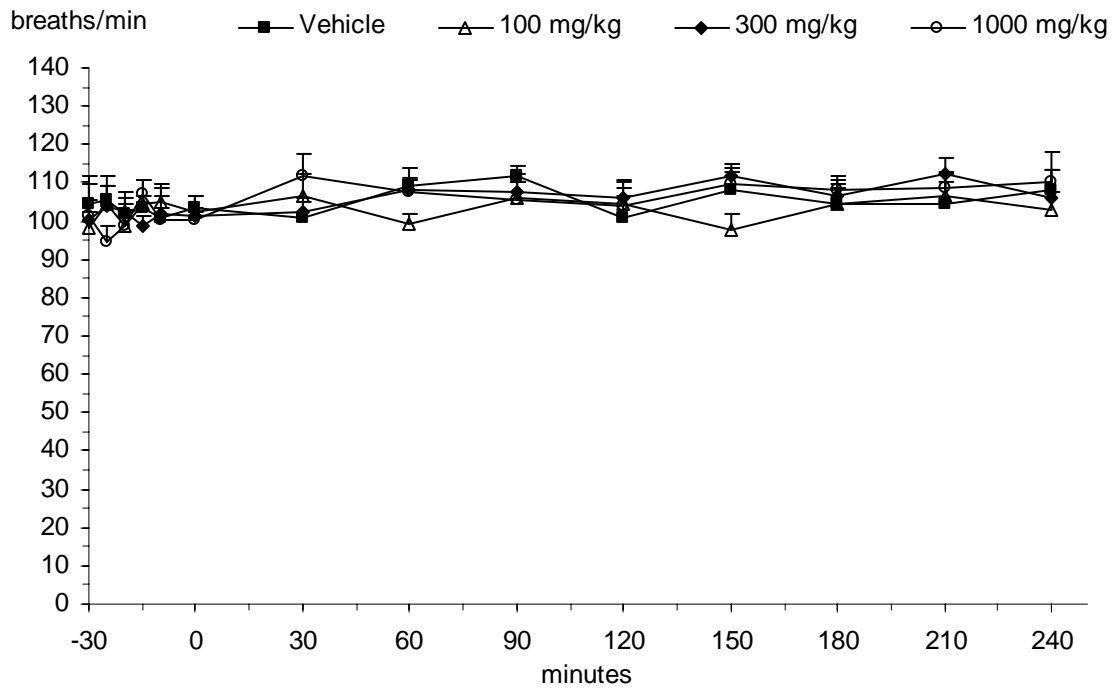



Figure 9 – Penh

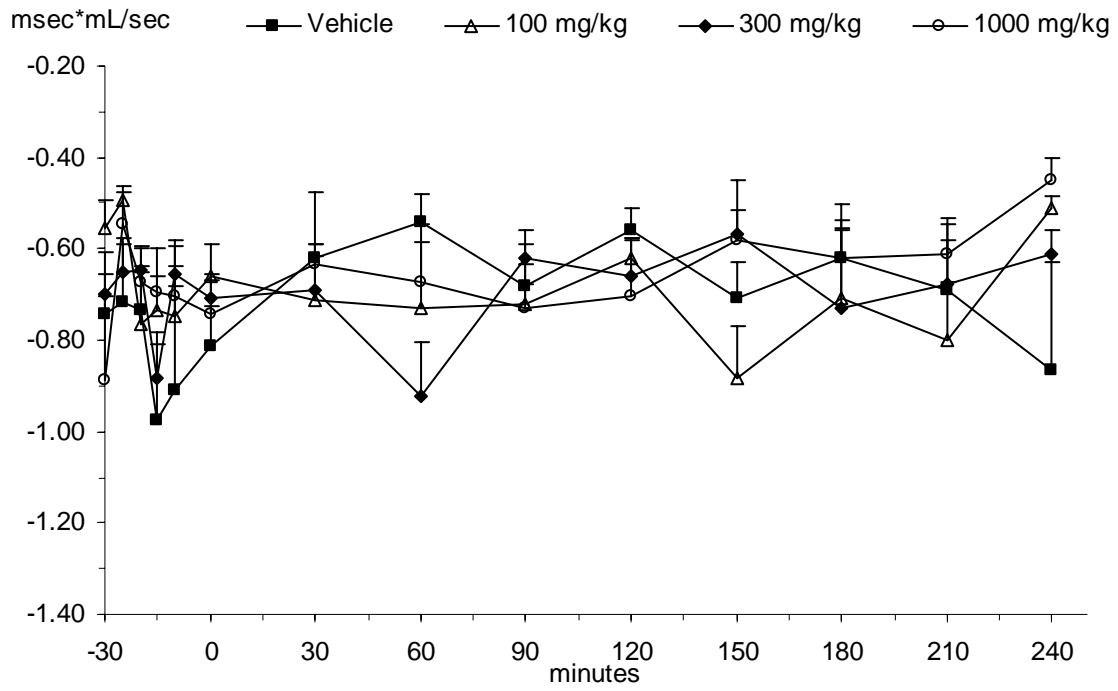

## **APPENDICES**

## ***Appendix 1 Study Data Listings***

Appendix 1.1 – Vehicle PO

Tidal volume (mL/kg)

| Time from treatment (min) | Animal number |      |      |      |      |      |      |      | Mean ± S.D.      | N        |
|---------------------------|---------------|------|------|------|------|------|------|------|------------------|----------|
|                           | 2833          | 2834 | 2835 | 2836 | 2837 | 2838 | 2839 | 2840 |                  |          |
| -30                       | 10.7          | 9.3  | 7.8  | 8.1  | 8.8  | 6.7  | 7.5  | 10.2 | <b>8.6 ± 1.4</b> | <b>8</b> |
| -25                       | 10.3          | 7.1  | 7.6  | 10.4 | 9.5  | 6.5  | 6.8  | 8.6  | <b>8.4 ± 1.6</b> | <b>8</b> |
| -20                       | 8.5           | 9.3  | 9.2  | 9.4  | 9.4  | 9.2  | 7.5  | 8.7  | <b>8.9 ± 0.7</b> | <b>8</b> |
| -15                       | 10.6          | 10.5 | 9.1  | 8.5  | 8.4  | 7.0  | 8.4  | 6.8  | <b>8.6 ± 1.4</b> | <b>8</b> |
| -10                       | 9.6           | 6.8  | 9.3  | 11.0 | 8.3  | 7.8  | 9.1  | 6.6  | <b>8.6 ± 1.5</b> | <b>8</b> |
| 0                         | 9.9           | 8.6  | 8.6  | 9.5  | 8.9  | 7.4  | 7.9  | 8.2  | <b>8.6 ± 0.8</b> | <b>8</b> |
| 30                        | 9.2           | 7.8  | 9.0  | 8.5  | -    | 8.0  | 8.2  | 7.9  | <b>8.4 ± 0.6</b> | <b>7</b> |
| 60                        | 9.8           | 6.8  | 8.5  | 8.2  | 6.6  | 7.5  | 7.9  | 10.7 | <b>8.2 ± 1.4</b> | <b>8</b> |
| 90                        | 12.2          | 6.3  | 7.3  | 8.4  | 10.3 | 6.6  | 7.6  | 8.9  | <b>8.4 ± 2.0</b> | <b>8</b> |
| 120                       | 10.9          | 6.2  | 7.4  | 7.9  | 7.6  | 6.2  | 8.2  | 10.6 | <b>8.1 ± 1.8</b> | <b>8</b> |
| 150                       | 7.6           | 6.0  | 7.9  | 7.9  | 7.7  | 7.1  | 7.4  | 6.8  | <b>7.3 ± 0.6</b> | <b>8</b> |
| 180                       | 8.5           | 7.9  | 8.3  | 8.0  | 5.8  | 7.8  | 9.1  | 8.1  | <b>7.9 ± 0.9</b> | <b>8</b> |
| 210                       | -             | 7.2  | 8.9  | 8.0  | 7.1  | 6.7  | 5.4  | 8.4  | <b>7.4 ± 1.2</b> | <b>7</b> |
| 240                       | 9.3           | 7.2  | 9.1  | 10.6 | 7.5  | 8.4  | 7.9  | 11.2 | <b>8.9 ± 1.4</b> | <b>8</b> |

Minute volume (mL/kg/min)

| Time from treatment (min) | Animal number |      |      |      |      |      |      |      | Mean ± S.D.      | N        |
|---------------------------|---------------|------|------|------|------|------|------|------|------------------|----------|
|                           | 2833          | 2834 | 2835 | 2836 | 2837 | 2838 | 2839 | 2840 |                  |          |
| -30                       | 978           | 1241 | 600  | 752  | 1183 | 793  | 646  | 1040 | <b>904 ± 242</b> | <b>8</b> |
| -25                       | 963           | 858  | 751  | 976  | 908  | 708  | 823  | 949  | <b>867 ± 100</b> | <b>8</b> |
| -20                       | 1040          | 1143 | 911  | 761  | 1037 | 897  | 621  | 869  | <b>910 ± 167</b> | <b>8</b> |
| -15                       | 1160          | 893  | 921  | 900  | 936  | 727  | 888  | 717  | <b>893 ± 138</b> | <b>8</b> |
| -10                       | 628           | 849  | 944  | 1199 | 1075 | 796  | 721  | 632  | <b>855 ± 206</b> | <b>8</b> |
| 0                         | 954           | 997  | 825  | 918  | 1028 | 784  | 740  | 841  | <b>886 ± 104</b> | <b>8</b> |
| 30                        | 1088          | 910  | 909  | 832  | -    | 855  | 690  | 659  | <b>849 ± 145</b> | <b>7</b> |
| 60                        | 1154          | 790  | 818  | 1036 | 767  | 819  | 640  | 1157 | <b>898 ± 193</b> | <b>8</b> |
| 90                        | 1453          | 742  | 849  | 884  | 1120 | 726  | 898  | 890  | <b>945 ± 238</b> | <b>8</b> |
| 120                       | 1194          | 796  | 703  | 771  | 758  | 697  | 721  | 793  | <b>804 ± 162</b> | <b>8</b> |
| 150                       | 671           | 726  | 893  | 906  | 1062 | 815  | 692  | 557  | <b>790 ± 161</b> | <b>8</b> |
| 180                       | 1030          | 877  | 704  | 779  | 666  | 858  | 741  | 930  | <b>823 ± 123</b> | <b>8</b> |
| 210                       | -             | 816  | 683  | 752  | 770  | 779  | 664  | 854  | <b>760 ± 68</b>  | <b>7</b> |
| 240                       | 1254          | 816  | 1002 | 1014 | 762  | 989  | 681  | 1221 | <b>967 ± 206</b> | <b>8</b> |

Respiratory rate (breaths/min)

| Time from treatment (min) | Animal number |      |      |      |      |      |      |      | Mean ± S.D.     | N        |
|---------------------------|---------------|------|------|------|------|------|------|------|-----------------|----------|
|                           | 2833          | 2834 | 2835 | 2836 | 2837 | 2838 | 2839 | 2840 |                 |          |
| -30                       | 91            | 133  | 77   | 93   | 134  | 118  | 86   | 102  | <b>104 ± 22</b> | <b>8</b> |
| -25                       | 94            | 121  | 99   | 94   | 95   | 110  | 121  | 110  | <b>105 ± 12</b> | <b>8</b> |
| -20                       | 123           | 123  | 99   | 81   | 110  | 98   | 83   | 100  | <b>102 ± 16</b> | <b>8</b> |
| -15                       | 110           | 85   | 101  | 106  | 112  | 104  | 105  | 106  | <b>104 ± 8</b>  | <b>8</b> |
| -10                       | 66            | 125  | 101  | 109  | 129  | 102  | 80   | 96   | <b>101 ± 21</b> | <b>8</b> |
| 0                         | 97            | 117  | 95   | 97   | 116  | 106  | 95   | 103  | <b>103 ± 9</b>  | <b>8</b> |
| 30                        | 118           | 117  | 101  | 98   | -    | 107  | 85   | 83   | <b>101 ± 14</b> | <b>7</b> |
| 60                        | 117           | 117  | 97   | 127  | 116  | 109  | 81   | 109  | <b>109 ± 14</b> | <b>8</b> |
| 90                        | 119           | 118  | 116  | 105  | 109  | 109  | 119  | 100  | <b>112 ± 7</b>  | <b>8</b> |
| 120                       | 110           | 129  | 94   | 97   | 100  | 113  | 88   | 75   | <b>101 ± 17</b> | <b>8</b> |
| 150                       | 88            | 120  | 114  | 114  | 138  | 115  | 93   | 82   | <b>108 ± 19</b> | <b>8</b> |
| 180                       | 122           | 112  | 85   | 98   | 115  | 110  | 82   | 114  | <b>105 ± 15</b> | <b>8</b> |
| 210                       | -             | 113  | 77   | 94   | 108  | 116  | 123  | 102  | <b>105 ± 15</b> | <b>7</b> |
| 240                       | 134           | 113  | 110  | 95   | 101  | 118  | 86   | 109  | <b>108 ± 15</b> | <b>8</b> |

“-“ see text (point 6.4.1 Deviations from Protocol)

Appendix 1.1 – Vehicle PO

Penh (enhanced pause, ((ET/RT)-1)\*(PEF/PIF))

| Time from treatment (min) | Animal number |       |       |       |       |       |       |       | Mean ± S.D.         | N        |
|---------------------------|---------------|-------|-------|-------|-------|-------|-------|-------|---------------------|----------|
|                           | 2833          | 2834  | 2835  | 2836  | 2837  | 2838  | 2839  | 2840  |                     |          |
| -30                       | -1.14         | -0.51 | -0.45 | -0.91 | -0.77 | -0.57 | -0.65 | -0.93 | <b>-0.74 ± 0.24</b> | <b>8</b> |
| -25                       | -0.55         | -0.67 | -0.42 | -0.62 | -0.56 | -0.58 | -0.78 | -1.56 | <b>-0.72 ± 0.36</b> | <b>8</b> |
| -20                       | -0.74         | -0.64 | -0.52 | -0.68 | -1.05 | -0.44 | -0.58 | -1.24 | <b>-0.73 ± 0.27</b> | <b>8</b> |
| -15                       | -0.85         | -1.88 | -0.45 | -0.57 | -1.07 | -0.69 | -0.91 | -1.37 | <b>-0.97 ± 0.47</b> | <b>8</b> |
| -10                       | -2.42         | -0.71 | -0.49 | -1.00 | -0.72 | -0.76 | -0.38 | -0.78 | <b>-0.91 ± 0.64</b> | <b>8</b> |
| 0                         | -1.14         | -0.88 | -0.47 | -0.76 | -0.83 | -0.61 | -0.66 | -1.17 | <b>-0.81 ± 0.25</b> | <b>8</b> |
| 30                        | -0.30         | -1.40 | -0.24 | -0.59 | -     | -0.74 | -0.65 | -0.43 | <b>-0.62 ± 0.39</b> | <b>7</b> |
| 60                        | -0.59         | -0.42 | -0.30 | -0.86 | -0.41 | -0.53 | -0.66 | -0.58 | <b>-0.54 ± 0.17</b> | <b>8</b> |
| 90                        | -0.49         | -0.70 | -0.50 | -0.80 | -1.16 | -0.59 | -0.87 | -0.34 | <b>-0.68 ± 0.26</b> | <b>8</b> |
| 120                       | -0.52         | -0.56 | -0.38 | -0.59 | -0.55 | -0.60 | -0.83 | -0.45 | <b>-0.56 ± 0.13</b> | <b>8</b> |
| 150                       | -0.46         | -0.64 | -0.92 | -0.51 | -0.71 | -0.55 | -0.76 | -1.10 | <b>-0.71 ± 0.22</b> | <b>8</b> |
| 180                       | -0.53         | -0.73 | -0.34 | -0.71 | -0.59 | -0.46 | -0.49 | -1.12 | <b>-0.62 ± 0.24</b> | <b>8</b> |
| 210                       | -             | -0.76 | -0.38 | -0.77 | -0.67 | -0.53 | -0.49 | -1.24 | <b>-0.69 ± 0.28</b> | <b>7</b> |
| 240                       | -0.74         | -0.75 | -0.42 | -0.69 | -2.46 | -0.38 | -0.91 | -0.58 | <b>-0.87 ± 0.67</b> | <b>8</b> |

Peak inspiration flow (mL/sec)

| Time from treatment (min) | Animal number |       |       |       |       |       |       |       | Mean ± S.D.        | N        |
|---------------------------|---------------|-------|-------|-------|-------|-------|-------|-------|--------------------|----------|
|                           | 2833          | 2834  | 2835  | 2836  | 2837  | 2838  | 2839  | 2840  |                    |          |
| -30                       | -14.1         | -18.9 | -11.7 | -14.2 | -19.3 | -14.1 | -14.2 | -17.2 | <b>-15.5 ± 2.7</b> | <b>8</b> |
| -25                       | -18.3         | -12.7 | -12.3 | -19.7 | -16.9 | -13.0 | -16.5 | -17.2 | <b>-15.8 ± 2.8</b> | <b>8</b> |
| -20                       | -13.3         | -17.6 | -13.8 | -17.1 | -19.4 | -20.1 | -13.5 | -14.1 | <b>-16.1 ± 2.8</b> | <b>8</b> |
| -15                       | -15.2         | -14.4 | -14.6 | -16.2 | -14.4 | -13.4 | -17.5 | -11.6 | <b>-14.7 ± 1.8</b> | <b>8</b> |
| -10                       | -21.2         | -12.4 | -14.0 | -18.4 | -15.7 | -13.9 | -18.5 | -10.6 | <b>-15.6 ± 3.6</b> | <b>8</b> |
| 0                         | -16.4         | -15.2 | -13.3 | -17.1 | -17.1 | -14.9 | -16.0 | -14.1 | <b>-15.5 ± 1.4</b> | <b>8</b> |
| 30                        | -19.8         | -12.9 | -21.7 | -16.5 | -     | -16.4 | -14.4 | -13.4 | <b>-16.5 ± 3.3</b> | <b>7</b> |
| 60                        | -14.7         | -13.3 | -16.7 | -17.3 | -13.2 | -15.8 | -13.3 | -18.2 | <b>-15.3 ± 2.0</b> | <b>8</b> |
| 90                        | -19.4         | -9.9  | -13.0 | -15.6 | -17.8 | -13.6 | -14.1 | -16.5 | <b>-15.0 ± 3.0</b> | <b>8</b> |
| 120                       | -15.7         | -11.9 | -12.2 | -13.1 | -14.0 | -12.6 | -15.4 | -17.6 | <b>-14.1 ± 2.0</b> | <b>8</b> |
| 150                       | -14.0         | -10.8 | -14.7 | -14.6 | -15.8 | -15.2 | -13.4 | -11.5 | <b>-13.7 ± 1.8</b> | <b>8</b> |
| 180                       | -13.0         | -12.9 | -14.6 | -13.7 | -12.4 | -16.0 | -16.9 | -17.8 | <b>-14.7 ± 2.0</b> | <b>8</b> |
| 210                       | -             | -11.7 | -14.0 | -13.8 | -14.1 | -15.3 | -12.0 | -13.3 | <b>-13.5 ± 1.3</b> | <b>7</b> |
| 240                       | -15.7         | -13.6 | -14.9 | -18.8 | -14.0 | -18.9 | -16.9 | -22.3 | <b>-16.9 ± 3.0</b> | <b>8</b> |

Peak expiration flow (mL/sec)

| Time from treatment (min) | Animal number |      |      |      |      |      |      |      | Mean ± S.D.       | N        |
|---------------------------|---------------|------|------|------|------|------|------|------|-------------------|----------|
|                           | 2833          | 2834 | 2835 | 2836 | 2837 | 2838 | 2839 | 2840 |                   |          |
| -30                       | 16.8          | 17.3 | 8.6  | 12.1 | 19.9 | 11.8 | 12.1 | 19.6 | <b>14.8 ± 4.2</b> | <b>8</b> |
| -25                       | 14.5          | 12.0 | 8.6  | 16.6 | 14.3 | 10.5 | 15.4 | 27.5 | <b>14.9 ± 5.7</b> | <b>8</b> |
| -20                       | 14.0          | 14.6 | 11.2 | 13.2 | 19.2 | 13.0 | 11.4 | 19.4 | <b>14.5 ± 3.2</b> | <b>8</b> |
| -15                       | 17.1          | 20.9 | 11.0 | 12.2 | 17.0 | 11.3 | 18.1 | 16.1 | <b>15.5 ± 3.6</b> | <b>8</b> |
| -10                       | 12.6          | 12.5 | 11.4 | 20.2 | 15.6 | 13.5 | 11.5 | 11.3 | <b>13.6 ± 3.0</b> | <b>8</b> |
| 0                         | 15.0          | 15.5 | 10.2 | 14.8 | 17.2 | 12.0 | 13.7 | 18.8 | <b>14.6 ± 2.7</b> | <b>8</b> |
| 30                        | 10.7          | 16.3 | 9.0  | 11.9 | -    | 14.5 | 12.9 | 10.3 | <b>12.2 ± 2.5</b> | <b>7</b> |
| 60                        | 13.5          | 11.0 | 9.0  | 17.6 | 9.3  | 12.6 | 11.4 | 17.0 | <b>12.7 ± 3.2</b> | <b>8</b> |
| 90                        | 15.1          | 11.1 | 10.2 | 13.7 | 22.8 | 11.5 | 16.2 | 11.3 | <b>14.0 ± 4.1</b> | <b>8</b> |
| 120                       | 13.6          | 10.0 | 8.1  | 10.3 | 10.7 | 11.0 | 13.1 | 14.3 | <b>11.4 ± 2.1</b> | <b>8</b> |
| 150                       | 8.0           | 9.8  | 16.7 | 10.6 | 17.1 | 12.0 | 11.8 | 13.3 | <b>12.4 ± 3.2</b> | <b>8</b> |
| 180                       | 11.3          | 13.2 | 8.4  | 11.3 | 10.1 | 12.0 | 12.8 | 24.8 | <b>13.0 ± 5.0</b> | <b>8</b> |
| 210                       | -             | 11.9 | 8.9  | 12.1 | 12.2 | 11.4 | 9.7  | 19.8 | <b>12.3 ± 3.5</b> | <b>7</b> |
| 240                       | 17.2          | 11.8 | 10.9 | 14.7 | 14.9 | 12.6 | 13.4 | 20.0 | <b>14.5 ± 3.0</b> | <b>8</b> |

“-“ see text (point 6.4.1 Deviations from Protocol)

Appendix 1.1 – Vehicle PO

Inspiration time (msec)

| Time from treatment (min) | Animal number |      |      |      |      |      |      |      | Mean ± S.D.     | N        |
|---------------------------|---------------|------|------|------|------|------|------|------|-----------------|----------|
|                           | 2833          | 2834 | 2835 | 2836 | 2837 | 2838 | 2839 | 2840 |                 |          |
| -30                       | 259           | 186  | 274  | 241  | 198  | 218  | 267  | 245  | <b>236 ± 32</b> | <b>8</b> |
| -25                       | 211           | 211  | 257  | 213  | 234  | 245  | 196  | 221  | <b>223 ± 20</b> | <b>8</b> |
| -20                       | 234           | 217  | 265  | 237  | 217  | 207  | 271  | 257  | <b>238 ± 24</b> | <b>8</b> |
| -15                       | 245           | 323  | 248  | 212  | 232  | 247  | 228  | 264  | <b>250 ± 34</b> | <b>8</b> |
| -10                       | 169           | 216  | 270  | 237  | 214  | 253  | 248  | 278  | <b>236 ± 35</b> | <b>8</b> |
| 0                         | 223           | 231  | 263  | 228  | 219  | 234  | 242  | 253  | <b>237 ± 15</b> | <b>8</b> |
| 30                        | 167           | 244  | 161  | 218  | -    | 212  | 277  | 280  | <b>223 ± 48</b> | <b>7</b> |
| 60                        | 223           | 203  | 210  | 198  | 214  | 230  | 291  | 228  | <b>225 ± 29</b> | <b>8</b> |
| 90                        | 204           | 246  | 233  | 218  | 231  | 230  | 250  | 221  | <b>229 ± 15</b> | <b>8</b> |
| 120                       | 240           | 212  | 258  | 243  | 243  | 226  | 257  | 256  | <b>242 ± 16</b> | <b>8</b> |
| 150                       | 207           | 232  | 227  | 210  | 195  | 217  | 247  | 279  | <b>227 ± 27</b> | <b>8</b> |
| 180                       | 232           | 233  | 246  | 233  | 223  | 220  | 258  | 211  | <b>232 ± 15</b> | <b>8</b> |
| 210                       | -             | 258  | 264  | 240  | 217  | 212  | 226  | 261  | <b>240 ± 22</b> | <b>7</b> |
| 240                       | 199           | 223  | 244  | 228  | 216  | 197  | 215  | 201  | <b>215 ± 16</b> | <b>8</b> |

Expiration time (msec)

| Time from treatment (min) | Animal number |      |      |      |      |      |      |      | Mean ± S.D.      | N        |
|---------------------------|---------------|------|------|------|------|------|------|------|------------------|----------|
|                           | 2833          | 2834 | 2835 | 2836 | 2837 | 2838 | 2839 | 2840 |                  |          |
| -30                       | 395           | 263  | 496  | 399  | 248  | 294  | 422  | 341  | <b>357 ± 86</b>  | <b>8</b> |
| -25                       | 435           | 284  | 349  | 426  | 395  | 300  | 277  | 337  | <b>350 ± 63</b>  | <b>8</b> |
| -20                       | 255           | 272  | 338  | 503  | 256  | 407  | 450  | 336  | <b>352 ± 93</b>  | <b>8</b> |
| -15                       | 302           | 374  | 346  | 351  | 302  | 325  | 341  | 288  | <b>329 ± 30</b>  | <b>8</b> |
| -10                       | 989           | 261  | 322  | 314  | 249  | 331  | 512  | 343  | <b>415 ± 245</b> | <b>8</b> |
| 0                         | 475           | 291  | 370  | 399  | 290  | 331  | 400  | 329  | <b>361 ± 63</b>  | <b>8</b> |
| 30                        | 343           | 267  | 433  | 396  | -    | 343  | 429  | 440  | <b>379 ± 64</b>  | <b>7</b> |
| 60                        | 287           | 310  | 411  | 258  | 301  | 319  | 448  | 321  | <b>332 ± 64</b>  | <b>8</b> |
| 90                        | 299           | 259  | 282  | 321  | 319  | 316  | 260  | 378  | <b>304 ± 39</b>  | <b>8</b> |
| 120                       | 306           | 251  | 374  | 373  | 356  | 302  | 413  | 507  | <b>360 ± 78</b>  | <b>8</b> |
| 150                       | 434           | 265  | 302  | 312  | 237  | 305  | 396  | 426  | <b>335 ± 74</b>  | <b>8</b> |
| 180                       | 259           | 304  | 455  | 380  | 297  | 323  | 470  | 319  | <b>351 ± 77</b>  | <b>8</b> |
| 210                       | -             | 270  | 517  | 397  | 336  | 304  | 262  | 325  | <b>344 ± 88</b>  | <b>7</b> |
| 240                       | 246           | 307  | 301  | 396  | 463  | 311  | 479  | 347  | <b>356 ± 82</b>  | <b>8</b> |

Relaxation time (msec)

| Time from treatment (min) | Animal number |      |      |      |      |      |      |      | Mean ± S.D.     | N        |
|---------------------------|---------------|------|------|------|------|------|------|------|-----------------|----------|
|                           | 2833          | 2834 | 2835 | 2836 | 2837 | 2838 | 2839 | 2840 |                 |          |
| -30                       | 202           | 169  | 307  | 193  | 142  | 175  | 240  | 188  | <b>202 ± 51</b> | <b>8</b> |
| -25                       | 257           | 167  | 218  | 245  | 236  | 175  | 151  | 171  | <b>203 ± 41</b> | <b>8</b> |
| -20                       | 149           | 153  | 206  | 268  | 124  | 242  | 268  | 177  | <b>198 ± 56</b> | <b>8</b> |
| -15                       | 172           | 163  | 216  | 200  | 159  | 179  | 182  | 145  | <b>177 ± 23</b> | <b>8</b> |
| -10                       | 196           | 153  | 201  | 164  | 144  | 186  | 318  | 199  | <b>195 ± 54</b> | <b>8</b> |
| 0                         | 195           | 161  | 230  | 214  | 161  | 191  | 232  | 176  | <b>195 ± 28</b> | <b>8</b> |
| 30                        | 220           | 127  | 275  | 218  | -    | 187  | 248  | 283  | <b>222 ± 54</b> | <b>7</b> |
| 60                        | 175           | 205  | 264  | 140  | 190  | 190  | 254  | 198  | <b>202 ± 40</b> | <b>8</b> |
| 90                        | 184           | 160  | 173  | 168  | 168  | 186  | 148  | 252  | <b>180 ± 32</b> | <b>8</b> |
| 120                       | 192           | 150  | 239  | 213  | 208  | 178  | 209  | 326  | <b>214 ± 52</b> | <b>8</b> |
| 150                       | 240           | 156  | 167  | 183  | 143  | 180  | 213  | 218  | <b>187 ± 33</b> | <b>8</b> |
| 180                       | 160           | 177  | 285  | 205  | 173  | 200  | 285  | 177  | <b>208 ± 50</b> | <b>8</b> |
| 210                       | -             | 155  | 324  | 212  | 190  | 178  | 163  | 177  | <b>200 ± 58</b> | <b>7</b> |
| 240                       | 147           | 165  | 191  | 210  | 140  | 198  | 223  | 212  | <b>186 ± 31</b> | <b>8</b> |

“-“ see text (point 6.4.1 Deviations from Protocol)

Appendix 1.2 – Fexinidazole, 100 mg/kg PO

Tidal volume (mL/kg)

| Time from treatment (min) | Animal number |      |      |      |      |      |      |      | Mean ± S.D.      | N        |
|---------------------------|---------------|------|------|------|------|------|------|------|------------------|----------|
|                           | 2841          | 2842 | 2843 | 2844 | 2845 | 2846 | 2847 | 2848 |                  |          |
| -30                       | 9.8           | 7.6  | 7.6  | 8.5  | 8.7  | 7.1  | 8.4  | 6.3  | <b>8.0 ± 1.1</b> | <b>8</b> |
| -25                       | 8.6           | 7.5  | 8.6  | 8.2  | 8.9  | 5.6  | 10.8 | 7.9  | <b>8.3 ± 1.4</b> | <b>8</b> |
| -20                       | 10.7          | 10.3 | 7.2  | 8.8  | 8.2  | 6.7  | 8.9  | 8.8  | <b>8.7 ± 1.4</b> | <b>8</b> |
| -15                       | 8.9           | 7.9  | 8.0  | 8.8  | 7.7  | 8.4  | 8.8  | 7.0  | <b>8.2 ± 0.7</b> | <b>8</b> |
| -10                       | 8.2           | 8.9  | 7.6  | 9.2  | 11.0 | 8.5  | 11.0 | 10.7 | <b>9.4 ± 1.4</b> | <b>8</b> |
| 0                         | 9.2           | 8.5  | 7.8  | 8.7  | 8.9  | 7.3  | 9.6  | 8.1  | <b>8.5 ± 0.8</b> | <b>8</b> |
| 30                        | 7.8           | 7.7  | 6.5  | 11.0 | 9.6  | 8.1  | 8.7  | 8.5  | <b>8.5 ± 1.4</b> | <b>8</b> |
| 60                        | 8.4           | -    | 8.8  | 8.8  | 8.7  | 7.9  | 12.8 | 9.1  | <b>9.2 ± 1.6</b> | <b>7</b> |
| 90                        | 8.2           | 6.2  | 7.7  | 8.4  | 9.4  | 8.8  | 9.7  | 6.9  | <b>8.2 ± 1.2</b> | <b>8</b> |
| 120                       | 8.5           | 7.6  | 8.1  | 10.7 | 7.6  | 7.8  | 12.2 | 9.7  | <b>9.0 ± 1.7</b> | <b>8</b> |
| 150                       | 8.5           | 8.1  | 11.0 | 7.6  | 7.3  | 6.8  | 9.7  | 9.4  | <b>8.6 ± 1.4</b> | <b>8</b> |
| 180                       | 9.1           | 8.0  | 9.1  | 10.2 | 8.6  | 8.3  | 9.7  | 7.5  | <b>8.8 ± 0.9</b> | <b>8</b> |
| 210                       | 8.1           | -    | 5.4  | 8.3  | 7.2  | 8.7  | 8.5  | 10.1 | <b>8.0 ± 1.5</b> | <b>7</b> |
| 240                       | 11.8          | 8.2  | 7.3  | 7.3  | 6.2  | 7.9  | 8.5  | 8.4  | <b>8.2 ± 1.7</b> | <b>8</b> |

Minute volume (mL/kg/min)

| Time from treatment (min) | Animal number |      |      |      |      |      |      |      | Mean ± S.D.      | N        |
|---------------------------|---------------|------|------|------|------|------|------|------|------------------|----------|
|                           | 2841          | 2842 | 2843 | 2844 | 2845 | 2846 | 2847 | 2848 |                  |          |
| -30                       | 921           | 840  | 759  | 816  | 923  | 789  | 636  | 569  | <b>782 ± 126</b> | <b>8</b> |
| -25                       | 1137          | 884  | 784  | 795  | 949  | 728  | 827  | 691  | <b>849 ± 142</b> | <b>8</b> |
| -20                       | 1197          | 1162 | 744  | 818  | 877  | 740  | 608  | 750  | <b>862 ± 211</b> | <b>8</b> |
| -15                       | 914           | 823  | 1030 | 809  | 878  | 931  | 622  | 784  | <b>849 ± 121</b> | <b>8</b> |
| -10                       | 972           | 964  | 607  | 904  | 1364 | 873  | 1091 | 1157 | <b>991 ± 222</b> | <b>8</b> |
| 0                         | 1028          | 934  | 785  | 828  | 998  | 812  | 757  | 790  | <b>867 ± 105</b> | <b>8</b> |
| 30                        | 867           | 882  | 574  | 1070 | 1290 | 965  | 857  | 764  | <b>909 ± 211</b> | <b>8</b> |
| 60                        | 849           | -    | 888  | 820  | 906  | 854  | 1082 | 910  | <b>901 ± 86</b>  | <b>7</b> |
| 90                        | 960           | 727  | 995  | 769  | 1031 | 858  | 708  | 791  | <b>855 ± 126</b> | <b>8</b> |
| 120                       | 954           | 776  | 927  | 1324 | 898  | 856  | 847  | 815  | <b>925 ± 171</b> | <b>8</b> |
| 150                       | 847           | 845  | 1010 | 841  | 614  | 769  | 959  | 747  | <b>829 ± 124</b> | <b>8</b> |
| 180                       | 1026          | 835  | 1068 | 1140 | 960  | 802  | 744  | 766  | <b>918 ± 151</b> | <b>8</b> |
| 210                       | 793           | -    | 708  | 867  | 862  | 977  | 698  | 985  | <b>841 ± 116</b> | <b>7</b> |
| 240                       | 1207          | 758  | 897  | 758  | 746  | 823  | 705  | 785  | <b>835 ± 161</b> | <b>8</b> |

Respiratory rate (breaths/min)

| Time from treatment (min) | Animal number |      |      |      |      |      |      |      | Mean ± S.D.     | N        |
|---------------------------|---------------|------|------|------|------|------|------|------|-----------------|----------|
|                           | 2841          | 2842 | 2843 | 2844 | 2845 | 2846 | 2847 | 2848 |                 |          |
| -30                       | 94            | 110  | 100  | 96   | 106  | 111  | 76   | 91   | <b>98 ± 12</b>  | <b>8</b> |
| -25                       | 133           | 118  | 91   | 97   | 106  | 129  | 77   | 87   | <b>105 ± 20</b> | <b>8</b> |
| -20                       | 112           | 113  | 103  | 93   | 107  | 110  | 68   | 86   | <b>99 ± 16</b>  | <b>8</b> |
| -15                       | 103           | 104  | 129  | 92   | 114  | 111  | 71   | 112  | <b>105 ± 17</b> | <b>8</b> |
| -10                       | 119           | 109  | 80   | 98   | 124  | 103  | 99   | 108  | <b>105 ± 14</b> | <b>8</b> |
| 0                         | 112           | 110  | 101  | 95   | 111  | 113  | 78   | 97   | <b>102 ± 12</b> | <b>8</b> |
| 30                        | 111           | 115  | 88   | 97   | 134  | 119  | 99   | 90   | <b>107 ± 16</b> | <b>8</b> |
| 60                        | 101           | -    | 101  | 93   | 104  | 109  | 85   | 101  | <b>99 ± 8</b>   | <b>7</b> |
| 90                        | 117           | 117  | 128  | 92   | 110  | 97   | 73   | 114  | <b>106 ± 18</b> | <b>8</b> |
| 120                       | 112           | 102  | 114  | 124  | 118  | 110  | 70   | 84   | <b>104 ± 18</b> | <b>8</b> |
| 150                       | 100           | 104  | 91   | 111  | 84   | 112  | 99   | 79   | <b>98 ± 12</b>  | <b>8</b> |
| 180                       | 113           | 104  | 118  | 112  | 112  | 97   | 77   | 102  | <b>104 ± 13</b> | <b>8</b> |
| 210                       | 98            | -    | 132  | 105  | 119  | 112  | 82   | 97   | <b>106 ± 16</b> | <b>7</b> |
| 240                       | 102           | 92   | 122  | 104  | 121  | 104  | 83   | 93   | <b>103 ± 14</b> | <b>8</b> |

“-“ see text (point 6.4.1 Deviations from Protocol)

## Appendix 1.2 – Fexinidazole, 100 mg/kg PO

## Inspiration time (msec)

| Time from treatment (min) | Animal number |      |      |      |      |      |      |      | Mean ± S.D.     | N        |
|---------------------------|---------------|------|------|------|------|------|------|------|-----------------|----------|
|                           | 2841          | 2842 | 2843 | 2844 | 2845 | 2846 | 2847 | 2848 |                 |          |
| -30                       | 196           | 220  | 280  | 240  | 225  | 168  | 336  | 331  | <b>249 ± 61</b> | <b>8</b> |
| -25                       | 167           | 206  | 267  | 229  | 209  | 179  | 241  | 321  | <b>227 ± 50</b> | <b>8</b> |
| -20                       | 165           | 213  | 269  | 237  | 233  | 232  | 337  | 312  | <b>250 ± 55</b> | <b>8</b> |
| -15                       | 202           | 223  | 226  | 227  | 219  | 221  | 347  | 292  | <b>244 ± 49</b> | <b>8</b> |
| -10                       | 190           | 211  | 328  | 228  | 189  | 239  | 169  | 247  | <b>225 ± 50</b> | <b>8</b> |
| 0                         | 184           | 214  | 274  | 232  | 215  | 208  | 286  | 301  | <b>239 ± 42</b> | <b>8</b> |
| 30                        | 219           | 225  | 300  | 207  | 194  | 239  | 271  | 311  | <b>246 ± 43</b> | <b>8</b> |
| 60                        | 235           | -    | 235  | 234  | 248  | 222  | 290  | 297  | <b>251 ± 30</b> | <b>7</b> |
| 90                        | 244           | 195  | 231  | 239  | 235  | 244  | 340  | 253  | <b>248 ± 41</b> | <b>8</b> |
| 120                       | 219           | 221  | 219  | 201  | 234  | 234  | 304  | 253  | <b>236 ± 31</b> | <b>8</b> |
| 150                       | 251           | 232  | 266  | 217  | 310  | 234  | 231  | 294  | <b>255 ± 33</b> | <b>8</b> |
| 180                       | 235           | 223  | 228  | 212  | 204  | 257  | 309  | 265  | <b>242 ± 34</b> | <b>8</b> |
| 210                       | 251           | -    | 188  | 215  | 223  | 240  | 340  | 284  | <b>249 ± 50</b> | <b>7</b> |
| 240                       | 211           | 230  | 222  | 221  | 232  | 223  | 295  | 299  | <b>242 ± 35</b> | <b>8</b> |

## Expiration time (msec)

| Time from treatment (min) | Animal number |      |      |      |      |      |      |      | Mean ± S.D.     | N        |
|---------------------------|---------------|------|------|------|------|------|------|------|-----------------|----------|
|                           | 2841          | 2842 | 2843 | 2844 | 2845 | 2846 | 2847 | 2848 |                 |          |
| -30                       | 439           | 325  | 319  | 382  | 344  | 373  | 447  | 324  | <b>369 ± 51</b> | <b>8</b> |
| -25                       | 271           | 302  | 381  | 387  | 356  | 268  | 540  | 365  | <b>359 ± 87</b> | <b>8</b> |
| -20                       | 371           | 320  | 309  | 404  | 326  | 325  | 535  | 362  | <b>369 ± 74</b> | <b>8</b> |
| -15                       | 373           | 354  | 238  | 427  | 306  | 343  | 496  | 240  | <b>347 ± 88</b> | <b>8</b> |
| -10                       | 313           | 320  | 366  | 382  | 295  | 340  | 388  | 308  | <b>339 ± 36</b> | <b>8</b> |
| 0                         | 353           | 324  | 323  | 396  | 325  | 330  | 481  | 320  | <b>357 ± 56</b> | <b>8</b> |
| 30                        | 321           | 294  | 378  | 410  | 251  | 265  | 351  | 353  | <b>328 ± 55</b> | <b>8</b> |
| 60                        | 360           | -    | 355  | 407  | 325  | 313  | 416  | 302  | <b>354 ± 45</b> | <b>7</b> |
| 90                        | 268           | 319  | 234  | 417  | 311  | 370  | 481  | 270  | <b>334 ± 84</b> | <b>8</b> |
| 120                       | 317           | 360  | 307  | 281  | 277  | 306  | 553  | 434  | <b>354 ± 95</b> | <b>8</b> |
| 150                       | 352           | 343  | 403  | 321  | 395  | 298  | 458  | 453  | <b>378 ± 59</b> | <b>8</b> |
| 180                       | 295           | 351  | 280  | 323  | 330  | 360  | 465  | 322  | <b>341 ± 57</b> | <b>8</b> |
| 210                       | 352           | -    | 265  | 356  | 268  | 296  | 401  | 320  | <b>322 ± 50</b> | <b>7</b> |
| 240                       | 386           | 419  | 265  | 350  | 251  | 354  | 419  | 342  | <b>348 ± 63</b> | <b>8</b> |

## Relaxation time (msec)

| Time from treatment (min) | Animal number |      |      |      |      |      |      |      | Mean ± S.D.     | N        |
|---------------------------|---------------|------|------|------|------|------|------|------|-----------------|----------|
|                           | 2841          | 2842 | 2843 | 2844 | 2845 | 2846 | 2847 | 2848 |                 |          |
| -30                       | 259           | 173  | 184  | 240  | 191  | 249  | 256  | 208  | <b>220 ± 35</b> | <b>8</b> |
| -25                       | 166           | 174  | 249  | 239  | 209  | 157  | 335  | 219  | <b>218 ± 58</b> | <b>8</b> |
| -20                       | 231           | 156  | 179  | 231  | 192  | 179  | 304  | 171  | <b>205 ± 48</b> | <b>8</b> |
| -15                       | 236           | 188  | 135  | 226  | 172  | 205  | 281  | 145  | <b>198 ± 49</b> | <b>8</b> |
| -10                       | 208           | 166  | 185  | 208  | 184  | 199  | 278  | 162  | <b>199 ± 36</b> | <b>8</b> |
| 0                         | 220           | 172  | 187  | 229  | 189  | 198  | 291  | 181  | <b>208 ± 38</b> | <b>8</b> |
| 30                        | 184           | 175  | 196  | 255  | 135  | 153  | 175  | 217  | <b>186 ± 37</b> | <b>8</b> |
| 60                        | 217           | -    | 195  | 270  | 195  | 190  | 236  | 139  | <b>206 ± 41</b> | <b>7</b> |
| 90                        | 147           | 138  | 137  | 275  | 170  | 244  | 279  | 158  | <b>194 ± 62</b> | <b>8</b> |
| 120                       | 179           | 196  | 177  | 166  | 165  | 192  | 307  | 236  | <b>202 ± 48</b> | <b>8</b> |
| 150                       | 176           | 182  | 214  | 185  | 204  | 178  | 198  | 272  | <b>201 ± 31</b> | <b>8</b> |
| 180                       | 183           | 205  | 174  | 180  | 180  | 205  | 289  | 152  | <b>196 ± 41</b> | <b>8</b> |
| 210                       | 194           | -    | 132  | 208  | 159  | 187  | 204  | 167  | <b>179 ± 27</b> | <b>7</b> |
| 240                       | 238           | 233  | 170  | 209  | 159  | 210  | 253  | 213  | <b>211 ± 32</b> | <b>8</b> |

“-“ see text (point 6.4.1 Deviations from Protocol)



## Appendix 1.3 – Fexinidazole, 300 mg/kg PO

## Tidal volume (mL/kg)

| Time from treatment (min) | Animal number |      |      |      |      |      |      |      | Mean ± S.D.      | N        |
|---------------------------|---------------|------|------|------|------|------|------|------|------------------|----------|
|                           | 2849          | 2850 | 2851 | 2852 | 2853 | 2854 | 2855 | 2856 |                  |          |
| -30                       | 8.4           | 8.6  | 7.3  | 7.4  | 8.1  | 7.1  | 7.9  | 9.4  | <b>8.0 ± 0.8</b> | <b>8</b> |
| -25                       | 8.6           | 6.0  | 7.1  | 9.7  | 10.3 | 7.9  | 8.6  | 7.3  | <b>8.2 ± 1.4</b> | <b>8</b> |
| -20                       | 9.0           | 6.5  | 8.9  | 7.6  | 8.8  | 8.2  | 6.9  | 7.7  | <b>7.9 ± 0.9</b> | <b>8</b> |
| -15                       | 12.1          | 6.0  | 7.1  | 9.7  | 12.2 | 7.8  | 6.5  | 10.0 | <b>8.9 ± 2.4</b> | <b>8</b> |
| -10                       | 9.0           | 7.5  | 8.5  | 9.8  | 8.1  | 8.4  | 11.1 | 6.2  | <b>8.6 ± 1.5</b> | <b>8</b> |
| 0                         | 9.4           | 6.9  | 7.8  | 8.8  | 9.5  | 7.9  | 8.2  | 8.1  | <b>8.3 ± 0.9</b> | <b>8</b> |
| 30                        | 8.2           | 7.7  | 7.7  | 10.6 | 8.0  | 9.3  | 8.0  | 8.9  | <b>8.6 ± 1.0</b> | <b>8</b> |
| 60                        | 9.0           | 8.4  | 7.7  | 9.5  | 7.9  | 7.0  | 6.5  | 7.2  | <b>7.9 ± 1.0</b> | <b>8</b> |
| 90                        | 9.0           | 6.2  | 7.0  | -    | 8.9  | 7.7  | 8.3  | 6.9  | <b>7.7 ± 1.1</b> | <b>7</b> |
| 120                       | 6.6           | 9.2  | 7.1  | 7.2  | 8.3  | 6.0  | 7.3  | 7.3  | <b>7.4 ± 1.0</b> | <b>8</b> |
| 150                       | 6.5           | 5.9  | 8.3  | 7.8  | 13.4 | 8.0  | 8.4  | 8.2  | <b>8.3 ± 2.2</b> | <b>8</b> |
| 180                       | 8.9           | 13.1 | 10.5 | 13.4 | 8.3  | 8.3  | 8.2  | 7.7  | <b>9.8 ± 2.3</b> | <b>8</b> |
| 210                       | 8.6           | 6.8  | 9.2  | 8.2  | 7.2  | 10.8 | 9.0  | -    | <b>8.5 ± 1.4</b> | <b>7</b> |
| 240                       | 8.7           | 9.3  | 9.5  | 7.0  | 8.2  | 8.6  | 8.4  | 9.2  | <b>8.6 ± 0.8</b> | <b>8</b> |

## Minute volume (mL/kg/min)

| Time from treatment (min) | Animal number |      |      |      |      |      |      |      | Mean ± S.D.       | N        |
|---------------------------|---------------|------|------|------|------|------|------|------|-------------------|----------|
|                           | 2849          | 2850 | 2851 | 2852 | 2853 | 2854 | 2855 | 2856 |                   |          |
| -30                       | 816           | 818  | 833  | 764  | 605  | 869  | 738  | 975  | <b>802 ± 107</b>  | <b>8</b> |
| -25                       | 671           | 628  | 673  | 1068 | 1318 | 905  | 774  | 796  | <b>854 ± 236</b>  | <b>8</b> |
| -20                       | 801           | 662  | 974  | 907  | 783  | 743  | 732  | 842  | <b>806 ± 100</b>  | <b>8</b> |
| -15                       | 1066          | 611  | 731  | 907  | 1105 | 796  | 705  | 1021 | <b>868 ± 184</b>  | <b>8</b> |
| -10                       | 874           | 798  | 860  | 818  | 767  | 791  | 1230 | 797  | <b>867 ± 151</b>  | <b>8</b> |
| 0                         | 846           | 703  | 814  | 893  | 915  | 821  | 836  | 886  | <b>839 ± 66</b>   | <b>8</b> |
| 30                        | 777           | 749  | 848  | 1138 | 765  | 999  | 784  | 973  | <b>879 ± 142</b>  | <b>8</b> |
| 60                        | 922           | 920  | 778  | 1006 | 766  | 839  | 769  | 804  | <b>851 ± 89</b>   | <b>8</b> |
| 90                        | 829           | 693  | 767  | -    | 885  | 855  | 946  | 773  | <b>821 ± 84</b>   | <b>7</b> |
| 120                       | 644           | 939  | 654  | 741  | 883  | 773  | 716  | 859  | <b>776 ± 108</b>  | <b>8</b> |
| 150                       | 707           | 685  | 880  | 857  | 1653 | 938  | 918  | 843  | <b>935 ± 304</b>  | <b>8</b> |
| 180                       | 861           | 1205 | 1192 | 1451 | 978  | 921  | 765  | 938  | <b>1039 ± 225</b> | <b>8</b> |
| 210                       | 947           | 740  | 1056 | 802  | 958  | 1139 | 1027 | -    | <b>953 ± 141</b>  | <b>7</b> |
| 240                       | 742           | 740  | 1117 | 859  | 836  | 1178 | 743  | 1077 | <b>912 ± 183</b>  | <b>8</b> |

## Respiratory rate (breaths/min)

| Time from treatment (min) | Animal number |      |      |      |      |      |      |      | Mean ± S.D.     | N        |
|---------------------------|---------------|------|------|------|------|------|------|------|-----------------|----------|
|                           | 2849          | 2850 | 2851 | 2852 | 2853 | 2854 | 2855 | 2856 |                 |          |
| -30                       | 97            | 95   | 113  | 103  | 75   | 123  | 94   | 103  | <b>101 ± 14</b> | <b>8</b> |
| -25                       | 78            | 105  | 95   | 110  | 128  | 114  | 91   | 108  | <b>104 ± 15</b> | <b>8</b> |
| -20                       | 89            | 102  | 110  | 120  | 89   | 90   | 106  | 110  | <b>102 ± 11</b> | <b>8</b> |
| -15                       | 88            | 102  | 103  | 93   | 91   | 102  | 109  | 102  | <b>99 ± 7</b>   | <b>8</b> |
| -10                       | 97            | 106  | 101  | 84   | 94   | 95   | 111  | 128  | <b>102 ± 13</b> | <b>8</b> |
| 0                         | 90            | 102  | 105  | 102  | 96   | 105  | 102  | 110  | <b>101 ± 6</b>  | <b>8</b> |
| 30                        | 94            | 97   | 110  | 107  | 95   | 108  | 97   | 110  | <b>102 ± 7</b>  | <b>8</b> |
| 60                        | 103           | 110  | 101  | 106  | 97   | 119  | 119  | 112  | <b>108 ± 8</b>  | <b>8</b> |
| 90                        | 93            | 112  | 110  | -    | 99   | 112  | 114  | 112  | <b>107 ± 8</b>  | <b>7</b> |
| 120                       | 98            | 103  | 92   | 103  | 107  | 129  | 98   | 117  | <b>106 ± 12</b> | <b>8</b> |
| 150                       | 109           | 116  | 106  | 111  | 124  | 117  | 109  | 103  | <b>112 ± 7</b>  | <b>8</b> |
| 180                       | 96            | 92   | 113  | 108  | 118  | 111  | 93   | 121  | <b>107 ± 11</b> | <b>8</b> |
| 210                       | 110           | 109  | 115  | 98   | 133  | 105  | 114  | -    | <b>112 ± 11</b> | <b>7</b> |
| 240                       | 85            | 80   | 118  | 123  | 102  | 137  | 88   | 117  | <b>106 ± 20</b> | <b>8</b> |

“-“ see text (point 6.4.1 Deviations from Protocol)

## Appendix 1.3 – Fexinidazole, 300 mg/kg PO

Penh (enhanced pause, ((ET/RT)-1)\*(PEF/PIF))

| Time from treatment (min) | Animal number |       |       |       |       |       |       |       | Mean ± S.D.         | N        |
|---------------------------|---------------|-------|-------|-------|-------|-------|-------|-------|---------------------|----------|
|                           | 2849          | 2850  | 2851  | 2852  | 2853  | 2854  | 2855  | 2856  |                     |          |
| -30                       | -0.64         | -0.66 | -0.48 | -0.52 | -0.72 | -0.51 | -0.79 | -1.28 | <b>-0.70 ± 0.26</b> | <b>8</b> |
| -25                       | -0.91         | -0.80 | -0.52 | -0.48 | -0.46 | -0.98 | -0.42 | -0.63 | <b>-0.65 ± 0.22</b> | <b>8</b> |
| -20                       | -0.60         | -0.66 | -0.38 | -0.80 | -0.85 | -0.60 | -0.59 | -0.69 | <b>-0.64 ± 0.14</b> | <b>8</b> |
| -15                       | -0.65         | -1.20 | -0.67 | -1.17 | -0.62 | -0.81 | -0.65 | -1.29 | <b>-0.88 ± 0.29</b> | <b>8</b> |
| -10                       | -0.69         | -0.72 | -0.46 | -0.45 | -0.53 | -1.02 | -0.47 | -0.91 | <b>-0.66 ± 0.22</b> | <b>8</b> |
| 0                         | -0.70         | -0.81 | -0.50 | -0.68 | -0.64 | -0.78 | -0.58 | -0.96 | <b>-0.71 ± 0.14</b> | <b>8</b> |
| 30                        | -0.43         | -1.08 | -0.34 | -0.48 | -0.74 | -0.81 | -0.59 | -1.05 | <b>-0.69 ± 0.28</b> | <b>8</b> |
| 60                        | -0.56         | -1.05 | -0.53 | -0.89 | -0.97 | -0.72 | -1.56 | -1.10 | <b>-0.92 ± 0.33</b> | <b>8</b> |
| 90                        | -0.38         | -0.67 | -0.43 | -     | -0.74 | -0.60 | -0.82 | -0.70 | <b>-0.62 ± 0.16</b> | <b>7</b> |
| 120                       | -0.49         | -1.12 | -0.58 | -0.36 | -0.49 | -0.78 | -0.83 | -0.63 | <b>-0.66 ± 0.24</b> | <b>8</b> |
| 150                       | -0.48         | -0.64 | -0.38 | -0.44 | -0.78 | -0.65 | -0.48 | -0.67 | <b>-0.57 ± 0.14</b> | <b>8</b> |
| 180                       | -0.58         | -2.27 | -0.22 | -0.29 | -0.50 | -0.71 | -0.66 | -0.64 | <b>-0.73 ± 0.64</b> | <b>8</b> |
| 210                       | -0.42         | -0.59 | -0.54 | -0.40 | -1.22 | -0.36 | -1.21 | -     | <b>-0.68 ± 0.38</b> | <b>7</b> |
| 240                       | -0.61         | -0.83 | -0.57 | -0.40 | -0.70 | -0.51 | -0.49 | -0.78 | <b>-0.61 ± 0.15</b> | <b>8</b> |

## Peak inspiration flow (mL/sec)

| Time from treatment (min) | Animal number |       |       |       |       |       |       |       | Mean ± S.D.        | N        |
|---------------------------|---------------|-------|-------|-------|-------|-------|-------|-------|--------------------|----------|
|                           | 2849          | 2850  | 2851  | 2852  | 2853  | 2854  | 2855  | 2856  |                    |          |
| -30                       | -14.0         | -14.8 | -13.7 | -14.3 | -15.8 | -13.2 | -14.1 | -15.0 | <b>-14.4 ± 0.8</b> | <b>8</b> |
| -25                       | -20.7         | -11.3 | -13.1 | -25.6 | -25.3 | -13.8 | -15.2 | -13.3 | <b>-17.3 ± 5.7</b> | <b>8</b> |
| -20                       | -14.3         | -12.7 | -24.5 | -13.7 | -17.2 | -15.3 | -12.5 | -13.9 | <b>-15.5 ± 3.9</b> | <b>8</b> |
| -15                       | -19.6         | -11.5 | -13.5 | -17.0 | -21.5 | -13.6 | -12.8 | -15.5 | <b>-15.6 ± 3.5</b> | <b>8</b> |
| -10                       | -17.3         | -14.5 | -15.4 | -17.5 | -18.8 | -14.5 | -24.0 | -11.6 | <b>-16.7 ± 3.7</b> | <b>8</b> |
| 0                         | -17.2         | -13.0 | -16.0 | -17.6 | -19.7 | -14.1 | -15.7 | -13.9 | <b>-15.9 ± 2.2</b> | <b>8</b> |
| 30                        | -14.9         | -14.4 | -14.7 | -21.4 | -15.9 | -16.3 | -15.6 | -16.6 | <b>-16.2 ± 2.2</b> | <b>8</b> |
| 60                        | -16.8         | -15.8 | -13.8 | -21.1 | -13.1 | -12.7 | -14.2 | -13.4 | <b>-15.1 ± 2.8</b> | <b>8</b> |
| 90                        | -16.4         | -12.5 | -12.4 | -     | -15.0 | -13.8 | -15.4 | -12.7 | <b>-14.0 ± 1.6</b> | <b>7</b> |
| 120                       | -11.1         | -15.2 | -13.0 | -19.3 | -15.0 | -11.7 | -12.8 | -14.5 | <b>-14.1 ± 2.6</b> | <b>8</b> |
| 150                       | -13.2         | -12.1 | -15.3 | -18.1 | -22.4 | -13.1 | -16.3 | -14.5 | <b>-15.6 ± 3.3</b> | <b>8</b> |
| 180                       | -16.5         | -30.3 | -22.9 | -28.4 | -17.0 | -14.0 | -14.0 | -15.4 | <b>-19.8 ± 6.5</b> | <b>8</b> |
| 210                       | -15.9         | -13.1 | -15.4 | -16.3 | -15.5 | -19.7 | -17.8 | -     | <b>-16.2 ± 2.0</b> | <b>7</b> |
| 240                       | -14.9         | -17.8 | -19.1 | -14.2 | -15.5 | -17.5 | -14.2 | -21.5 | <b>-16.9 ± 2.6</b> | <b>8</b> |

## Peak expiration flow (mL/sec)

| Time from treatment (min) | Animal number |      |      |      |      |      |      |      | Mean ± S.D.       | N        |
|---------------------------|---------------|------|------|------|------|------|------|------|-------------------|----------|
|                           | 2849          | 2850 | 2851 | 2852 | 2853 | 2854 | 2855 | 2856 |                   |          |
| -30                       | 12.0          | 11.4 | 10.8 | 10.6 | 12.9 | 11.2 | 12.3 | 18.5 | <b>12.5 ± 2.6</b> | <b>8</b> |
| -25                       | 18.6          | 10.5 | 9.7  | 13.8 | 18.7 | 18.8 | 10.8 | 12.3 | <b>14.1 ± 4.0</b> | <b>8</b> |
| -20                       | 11.9          | 10.6 | 13.5 | 15.3 | 14.8 | 12.9 | 10.3 | 12.9 | <b>12.8 ± 1.8</b> | <b>8</b> |
| -15                       | 17.2          | 12.1 | 10.6 | 22.0 | 17.1 | 12.1 | 10.2 | 19.1 | <b>15.0 ± 4.4</b> | <b>8</b> |
| -10                       | 14.7          | 12.4 | 11.1 | 11.5 | 12.1 | 14.4 | 16.7 | 14.3 | <b>13.4 ± 1.9</b> | <b>8</b> |
| 0                         | 14.9          | 11.4 | 11.1 | 14.6 | 15.1 | 13.9 | 12.0 | 15.4 | <b>13.6 ± 1.8</b> | <b>8</b> |
| 30                        | 10.3          | 12.9 | 10.2 | 15.6 | 14.6 | 18.1 | 11.4 | 18.0 | <b>13.9 ± 3.2</b> | <b>8</b> |
| 60                        | 12.6          | 15.4 | 10.4 | 17.6 | 15.1 | 12.9 | 15.9 | 15.2 | <b>14.4 ± 2.3</b> | <b>8</b> |
| 90                        | 11.6          | 9.8  | 9.5  | -    | 12.4 | 12.1 | 16.0 | 13.7 | <b>12.2 ± 2.2</b> | <b>7</b> |
| 120                       | 9.5           | 19.8 | 9.4  | 10.2 | 12.2 | 12.4 | 11.9 | 13.0 | <b>12.3 ± 3.3</b> | <b>8</b> |
| 150                       | 9.8           | 9.7  | 10.9 | 11.2 | 24.8 | 12.9 | 12.2 | 15.9 | <b>13.4 ± 5.0</b> | <b>8</b> |
| 180                       | 12.6          | 25.5 | 13.8 | 15.9 | 13.3 | 13.9 | 11.7 | 13.9 | <b>15.1 ± 4.4</b> | <b>8</b> |
| 210                       | 11.7          | 10.5 | 13.2 | 10.8 | 19.2 | 14.1 | 20.9 | -    | <b>14.4 ± 4.1</b> | <b>7</b> |
| 240                       | 12.2          | 17.5 | 13.2 | 11.3 | 14.0 | 14.6 | 11.2 | 18.6 | <b>14.1 ± 2.7</b> | <b>8</b> |

“-“ see text (point 6.4.1 Deviations from Protocol)

Appendix 1.3 – Fexinidazole, 300 mg/kg PO

Inspiration time (msec)

| Time from treatment (min) | Animal number |      |      |      |      |      |      |      | Mean ± S.D.     | N        |
|---------------------------|---------------|------|------|------|------|------|------|------|-----------------|----------|
|                           | 2849          | 2850 | 2851 | 2852 | 2853 | 2854 | 2855 | 2856 |                 |          |
| -30                       | 252           | 238  | 230  | 219  | 254  | 222  | 248  | 271  | <b>242 ± 18</b> | <b>8</b> |
| -25                       | 189           | 226  | 239  | 170  | 170  | 228  | 256  | 229  | <b>213 ± 33</b> | <b>8</b> |
| -20                       | 260           | 223  | 169  | 225  | 238  | 224  | 241  | 237  | <b>227 ± 27</b> | <b>8</b> |
| -15                       | 241           | 229  | 242  | 232  | 235  | 230  | 224  | 254  | <b>236 ± 10</b> | <b>8</b> |
| -10                       | 229           | 217  | 235  | 252  | 220  | 253  | 200  | 217  | <b>228 ± 18</b> | <b>8</b> |
| 0                         | 234           | 226  | 223  | 220  | 223  | 231  | 234  | 241  | <b>229 ± 7</b>  | <b>8</b> |
| 30                        | 251           | 240  | 227  | 219  | 224  | 237  | 247  | 224  | <b>234 ± 12</b> | <b>8</b> |
| 60                        | 237           | 231  | 237  | 230  | 270  | 228  | 231  | 239  | <b>238 ± 13</b> | <b>8</b> |
| 90                        | 244           | 212  | 240  | -    | 263  | 223  | 223  | 237  | <b>235 ± 17</b> | <b>7</b> |
| 120                       | 272           | 236  | 244  | 180  | 239  | 203  | 258  | 239  | <b>234 ± 29</b> | <b>8</b> |
| 150                       | 229           | 211  | 235  | 200  | 227  | 241  | 224  | 244  | <b>226 ± 15</b> | <b>8</b> |
| 180                       | 248           | 137  | 183  | 207  | 227  | 232  | 277  | 219  | <b>216 ± 42</b> | <b>8</b> |
| 210                       | 239           | 213  | 237  | 232  | 213  | 213  | 208  | -    | <b>222 ± 13</b> | <b>7</b> |
| 240                       | 261           | 224  | 204  | 224  | 230  | 193  | 258  | 189  | <b>223 ± 27</b> | <b>8</b> |

Expiration time (msec)

| Time from treatment (min) | Animal number |      |      |      |      |      |      |      | Mean ± S.D.      | N        |
|---------------------------|---------------|------|------|------|------|------|------|------|------------------|----------|
|                           | 2849          | 2850 | 2851 | 2852 | 2853 | 2854 | 2855 | 2856 |                  |          |
| -30                       | 364           | 390  | 293  | 359  | 521  | 266  | 384  | 304  | <b>360 ± 79</b>  | <b>8</b> |
| -25                       | 310           | 341  | 387  | 392  | 302  | 294  | 396  | 322  | <b>343 ± 43</b>  | <b>8</b> |
| -20                       | 405           | 362  | 387  | 274  | 426  | 448  | 322  | 306  | <b>366 ± 61</b>  | <b>8</b> |
| -15                       | 438           | 352  | 334  | 414  | 387  | 356  | 323  | 330  | <b>367 ± 42</b>  | <b>8</b> |
| -10                       | 386           | 345  | 354  | 460  | 414  | 379  | 343  | 249  | <b>366 ± 62</b>  | <b>8</b> |
| 0                         | 381           | 358  | 351  | 380  | 410  | 348  | 353  | 302  | <b>360 ± 31</b>  | <b>8</b> |
| 30                        | 380           | 350  | 316  | 340  | 404  | 320  | 358  | 300  | <b>346 ± 35</b>  | <b>8</b> |
| 60                        | 346           | 314  | 352  | 339  | 342  | 273  | 339  | 297  | <b>325 ± 28</b>  | <b>8</b> |
| 90                        | 402           | 318  | 299  | -    | 366  | 314  | 307  | 297  | <b>329 ± 39</b>  | <b>7</b> |
| 120                       | 332           | 347  | 375  | 410  | 322  | 236  | 348  | 270  | <b>330 ± 55</b>  | <b>8</b> |
| 150                       | 320           | 304  | 299  | 342  | 256  | 270  | 324  | 337  | <b>307 ± 31</b>  | <b>8</b> |
| 180                       | 372           | 609  | 344  | 349  | 282  | 307  | 349  | 274  | <b>361 ± 106</b> | <b>8</b> |
| 210                       | 302           | 333  | 282  | 379  | 232  | 356  | 318  | -    | <b>315 ± 49</b>  | <b>7</b> |
| 240                       | 438           | 526  | 331  | 267  | 353  | 244  | 421  | 327  | <b>363 ± 94</b>  | <b>8</b> |

Relaxation time (msec)

| Time from treatment (min) | Animal number |      |      |      |      |      |      |      | Mean ± S.D.     | N        |
|---------------------------|---------------|------|------|------|------|------|------|------|-----------------|----------|
|                           | 2849          | 2850 | 2851 | 2852 | 2853 | 2854 | 2855 | 2856 |                 |          |
| -30                       | 208           | 210  | 183  | 211  | 277  | 166  | 202  | 149  | <b>201 ± 38</b> | <b>8</b> |
| -25                       | 154           | 183  | 226  | 207  | 185  | 171  | 248  | 192  | <b>196 ± 30</b> | <b>8</b> |
| -20                       | 236           | 203  | 230  | 159  | 215  | 263  | 188  | 175  | <b>208 ± 34</b> | <b>8</b> |
| -15                       | 252           | 165  | 181  | 217  | 218  | 187  | 177  | 162  | <b>195 ± 31</b> | <b>8</b> |
| -10                       | 212           | 188  | 216  | 273  | 227  | 187  | 205  | 143  | <b>206 ± 37</b> | <b>8</b> |
| 0                         | 212           | 190  | 207  | 213  | 224  | 195  | 204  | 164  | <b>201 ± 18</b> | <b>8</b> |
| 30                        | 233           | 158  | 211  | 205  | 224  | 185  | 198  | 153  | <b>196 ± 29</b> | <b>8</b> |
| 60                        | 199           | 151  | 206  | 164  | 186  | 160  | 142  | 151  | <b>170 ± 24</b> | <b>8</b> |
| 90                        | 260           | 171  | 192  | -    | 193  | 186  | 171  | 181  | <b>193 ± 31</b> | <b>7</b> |
| 120                       | 211           | 186  | 209  | 243  | 200  | 136  | 184  | 159  | <b>191 ± 33</b> | <b>8</b> |
| 150                       | 195           | 169  | 195  | 199  | 150  | 163  | 197  | 209  | <b>185 ± 21</b> | <b>8</b> |
| 180                       | 212           | 165  | 252  | 229  | 172  | 179  | 195  | 161  | <b>196 ± 33</b> | <b>8</b> |
| 210                       | 192           | 193  | 174  | 237  | 117  | 237  | 157  | -    | <b>187 ± 43</b> | <b>7</b> |
| 240                       | 251           | 285  | 181  | 178  | 199  | 151  | 259  | 172  | <b>209 ± 49</b> | <b>8</b> |

“-“ see text (point 6.4.1 Deviations from Protocol)

Appendix 1.4 – Fexinidazole, 1000 mg/kg PO

Tidal volume (mL/kg)

| Time from treatment (min) | Animal number |      |      |      |      |      |      |      | Mean ± S.D.      | N        |
|---------------------------|---------------|------|------|------|------|------|------|------|------------------|----------|
|                           | 2857          | 2858 | 2859 | 2860 | 2861 | 2862 | 2863 | 2864 |                  |          |
| -30                       | 10.4          | 8.1  | 7.3  | 7.7  | 8.9  | 8.4  | 9.5  | 6.1  | <b>8.3 ± 1.3</b> | <b>8</b> |
| -25                       | 9.2           | 9.1  | 7.7  | 9.0  | -    | 8.2  | 8.0  | 10.1 | <b>8.8 ± 0.8</b> | <b>7</b> |
| -20                       | 12.3          | 9.0  | 10.3 | 9.2  | -    | 7.8  | 9.0  | 7.7  | <b>9.3 ± 1.6</b> | <b>7</b> |
| -15                       | 12.6          | 13.1 | 8.7  | 9.1  | 9.1  | 5.8  | 7.1  | 9.1  | <b>9.3 ± 2.5</b> | <b>8</b> |
| -10                       | 8.7           | 9.0  | 9.6  | 8.8  | -    | 7.1  | 9.1  | 6.5  | <b>8.4 ± 1.1</b> | <b>7</b> |
| 0                         | 10.6          | 9.6  | 8.7  | 8.8  | 9.0  | 7.5  | 8.5  | 7.9  | <b>8.8 ± 1.0</b> | <b>8</b> |
| 30                        | 8.2           | 11.7 | 9.3  | 9.1  | 7.7  | 5.8  | 8.5  | 7.7  | <b>8.5 ± 1.7</b> | <b>8</b> |
| 60                        | 9.9           | 7.7  | 8.2  | 8.9  | 9.3  | 8.2  | 8.4  | 6.7  | <b>8.4 ± 1.0</b> | <b>8</b> |
| 90                        | 9.3           | 8.9  | 8.6  | 8.9  | 6.6  | 7.3  | 7.5  | 7.5  | <b>8.1 ± 1.0</b> | <b>8</b> |
| 120                       | 10.4          | -    | 10.1 | 7.4  | 9.0  | 6.8  | 10.1 | 10.1 | <b>9.1 ± 1.5</b> | <b>7</b> |
| 150                       | 11.7          | -    | 8.7  | 6.4  | 8.9  | 7.5  | 7.6  | 7.6  | <b>8.3 ± 1.7</b> | <b>7</b> |
| 180                       | 8.6           | -    | 7.8  | 6.5  | 8.0  | 6.4  | 8.2  | 8.4  | <b>7.7 ± 0.9</b> | <b>7</b> |
| 210                       | 9.2           | 9.0  | 8.1  | 8.1  | 7.9  | 8.1  | 7.8  | 6.7  | <b>8.1 ± 0.7</b> | <b>8</b> |
| 240                       | 9.7           | 9.3  | 8.6  | 9.8  | 9.6  | 6.9  | 8.4  | 8.3  | <b>8.8 ± 1.0</b> | <b>8</b> |

Minute volume (mL/kg/min)

| Time from treatment (min) | Animal number |      |      |      |      |      |      |      | Mean ± S.D.      | N        |
|---------------------------|---------------|------|------|------|------|------|------|------|------------------|----------|
|                           | 2857          | 2858 | 2859 | 2860 | 2861 | 2862 | 2863 | 2864 |                  |          |
| -30                       | 871           | 1008 | 845  | 957  | 595  | 903  | 676  | 727  | <b>823 ± 144</b> | <b>8</b> |
| -25                       | 697           | 807  | 770  | 886  | -    | 874  | 713  | 1043 | <b>827 ± 120</b> | <b>7</b> |
| -20                       | 1234          | 804  | 1115 | 868  | -    | 878  | 951  | 614  | <b>923 ± 204</b> | <b>7</b> |
| -15                       | 1398          | 1319 | 882  | 928  | 1193 | 656  | 707  | 892  | <b>997 ± 276</b> | <b>8</b> |
| -10                       | 848           | 789  | 1111 | 865  | -    | 721  | 935  | 630  | <b>843 ± 155</b> | <b>7</b> |
| 0                         | 1009          | 945  | 944  | 901  | 894  | 806  | 796  | 781  | <b>885 ± 83</b>  | <b>8</b> |
| 30                        | 766           | 1328 | 1299 | 1110 | 852  | 680  | 871  | 746  | <b>956 ± 255</b> | <b>8</b> |
| 60                        | 997           | 747  | 937  | 1095 | 1000 | 900  | 839  | 741  | <b>907 ± 126</b> | <b>8</b> |
| 90                        | 1063          | 773  | 840  | 933  | 878  | 798  | 708  | 774  | <b>846 ± 112</b> | <b>8</b> |
| 120                       | 1083          | -    | 1075 | 668  | 1118 | 728  | 893  | 1103 | <b>953 ± 190</b> | <b>7</b> |
| 150                       | 1257          | -    | 1029 | 782  | 964  | 788  | 739  | 831  | <b>913 ± 185</b> | <b>7</b> |
| 180                       | 890           | -    | 935  | 783  | 860  | 689  | 783  | 841  | <b>826 ± 82</b>  | <b>7</b> |
| 210                       | 894           | 1058 | 923  | 826  | 909  | 902  | 750  | 799  | <b>883 ± 94</b>  | <b>8</b> |
| 240                       | 866           | 842  | 1298 | 1249 | 1172 | 773  | 837  | 747  | <b>973 ± 227</b> | <b>8</b> |

Respiratory rate (breaths/min)

| Time from treatment (min) | Animal number |      |      |      |      |      |      |      | Mean ± S.D.     | N        |
|---------------------------|---------------|------|------|------|------|------|------|------|-----------------|----------|
|                           | 2857          | 2858 | 2859 | 2860 | 2861 | 2862 | 2863 | 2864 |                 |          |
| -30                       | 83            | 124  | 115  | 124  | 67   | 108  | 71   | 119  | <b>101 ± 24</b> | <b>8</b> |
| -25                       | 76            | 89   | 100  | 99   | -    | 106  | 89   | 104  | <b>95 ± 11</b>  | <b>7</b> |
| -20                       | 100           | 89   | 108  | 95   | -    | 113  | 105  | 80   | <b>99 ± 12</b>  | <b>7</b> |
| -15                       | 111           | 101  | 101  | 102  | 131  | 113  | 99   | 99   | <b>107 ± 11</b> | <b>8</b> |
| -10                       | 97            | 88   | 116  | 98   | -    | 102  | 103  | 96   | <b>100 ± 8</b>  | <b>7</b> |
| 0                         | 94            | 98   | 108  | 103  | 99   | 108  | 94   | 99   | <b>100 ± 6</b>  | <b>8</b> |
| 30                        | 93            | 113  | 140  | 122  | 110  | 118  | 102  | 96   | <b>112 ± 15</b> | <b>8</b> |
| 60                        | 100           | 97   | 115  | 123  | 108  | 109  | 99   | 111  | <b>108 ± 9</b>  | <b>8</b> |
| 90                        | 114           | 87   | 98   | 104  | 132  | 110  | 94   | 103  | <b>105 ± 14</b> | <b>8</b> |
| 120                       | 104           | -    | 107  | 90   | 124  | 107  | 89   | 109  | <b>104 ± 12</b> | <b>7</b> |
| 150                       | 108           | -    | 118  | 122  | 109  | 105  | 97   | 110  | <b>110 ± 8</b>  | <b>7</b> |
| 180                       | 104           | -    | 120  | 121  | 108  | 108  | 96   | 100  | <b>108 ± 9</b>  | <b>7</b> |
| 210                       | 97            | 118  | 114  | 102  | 114  | 111  | 96   | 119  | <b>109 ± 9</b>  | <b>8</b> |
| 240                       | 89            | 90   | 152  | 127  | 122  | 111  | 99   | 90   | <b>110 ± 22</b> | <b>8</b> |

“-“ see text (point 6.4.1 Deviations from Protocol)

Appendix 1.4 – Fexinidazole, 1000 mg/kg PO

Penh (enhanced pause, ((ET/RT)-1)\*(PEF/PIF))

| Time from treatment (min) | Animal number |       |       |       |       |       |       |       | Mean ± S.D.         | N        |
|---------------------------|---------------|-------|-------|-------|-------|-------|-------|-------|---------------------|----------|
|                           | 2857          | 2858  | 2859  | 2860  | 2861  | 2862  | 2863  | 2864  |                     |          |
| -30                       | -0.62         | -1.40 | -0.72 | -0.93 | -1.90 | -0.44 | -0.44 | -0.64 | <b>-0.89 ± 0.51</b> | <b>8</b> |
| -25                       | -0.66         | -0.54 | -0.83 | -0.29 | -     | -0.55 | -0.33 | -0.65 | <b>-0.55 ± 0.19</b> | <b>7</b> |
| -20                       | -0.72         | -0.81 | -0.53 | -0.42 | -     | -1.00 | -0.66 | -0.55 | <b>-0.67 ± 0.19</b> | <b>7</b> |
| -15                       | -0.54         | -0.68 | -1.19 | -0.56 | -0.51 | -0.57 | -0.46 | -1.07 | <b>-0.70 ± 0.27</b> | <b>8</b> |
| -10                       | -0.67         | -0.62 | -0.68 | -0.43 | -     | -0.90 | -0.97 | -0.66 | <b>-0.70 ± 0.18</b> | <b>7</b> |
| 0                         | -0.64         | -0.81 | -0.79 | -0.53 | -1.20 | -0.69 | -0.57 | -0.71 | <b>-0.74 ± 0.21</b> | <b>8</b> |
| 30                        | -0.68         | -0.44 | -0.73 | -0.79 | -0.68 | -0.50 | -0.53 | -0.72 | <b>-0.63 ± 0.12</b> | <b>8</b> |
| 60                        | -1.20         | -0.55 | -0.56 | -0.59 | -0.44 | -0.86 | -0.62 | -0.56 | <b>-0.67 ± 0.24</b> | <b>8</b> |
| 90                        | -0.67         | -0.42 | -0.79 | -0.81 | -0.68 | -0.78 | -0.90 | -0.80 | <b>-0.73 ± 0.15</b> | <b>8</b> |
| 120                       | -0.36         | -     | -1.20 | -0.61 | -1.14 | -0.53 | -0.48 | -0.60 | <b>-0.70 ± 0.33</b> | <b>7</b> |
| 150                       | -0.29         | -     | -0.44 | -1.30 | -0.68 | -0.41 | -0.55 | -0.37 | <b>-0.58 ± 0.34</b> | <b>7</b> |
| 180                       | -0.61         | -     | -0.98 | -0.62 | -0.57 | -0.52 | -0.65 | -0.40 | <b>-0.62 ± 0.18</b> | <b>7</b> |
| 210                       | -0.49         | -0.79 | -0.51 | -0.54 | -0.95 | -0.68 | -0.39 | -0.54 | <b>-0.61 ± 0.18</b> | <b>8</b> |
| 240                       | -0.65         | -0.56 | -0.52 | -0.28 | -0.30 | -0.46 | -0.29 | -0.53 | <b>-0.45 ± 0.14</b> | <b>8</b> |

Peak inspiration flow (mL/sec)

| Time from treatment (min) | Animal number |       |       |       |       |       |       |       | Mean ± S.D.        | N        |
|---------------------------|---------------|-------|-------|-------|-------|-------|-------|-------|--------------------|----------|
|                           | 2857          | 2858  | 2859  | 2860  | 2861  | 2862  | 2863  | 2864  |                    |          |
| -30                       | -16.1         | -15.6 | -13.5 | -18.2 | -28.8 | -22.2 | -17.6 | -13.6 | <b>-18.2 ± 5.1</b> | <b>8</b> |
| -25                       | -15.4         | -16.3 | -15.0 | -16.8 | -     | -16.8 | -17.7 | -19.1 | <b>-16.7 ± 1.4</b> | <b>7</b> |
| -20                       | -18.7         | -14.0 | -18.8 | -15.5 | -     | -14.5 | -18.2 | -13.7 | <b>-16.2 ± 2.3</b> | <b>7</b> |
| -15                       | -21.6         | -23.1 | -13.9 | -15.4 | -23.6 | -12.0 | -16.6 | -16.2 | <b>-17.8 ± 4.4</b> | <b>8</b> |
| -10                       | -13.7         | -16.1 | -17.5 | -15.4 | -     | -14.1 | -17.6 | -12.4 | <b>-15.3 ± 2.0</b> | <b>7</b> |
| 0                         | -17.1         | -17.0 | -15.8 | -16.3 | -26.2 | -15.9 | -17.6 | -15.0 | <b>-17.6 ± 3.6</b> | <b>8</b> |
| 30                        | -12.2         | -29.6 | -18.7 | -17.9 | -13.4 | -11.9 | -17.4 | -15.2 | <b>-17.0 ± 5.7</b> | <b>8</b> |
| 60                        | -13.0         | -12.5 | -21.2 | -18.5 | -21.1 | -15.3 | -17.6 | -12.3 | <b>-16.4 ± 3.7</b> | <b>8</b> |
| 90                        | -14.0         | -14.1 | -13.9 | -15.9 | -13.0 | -15.4 | -14.1 | -13.6 | <b>-14.3 ± 1.0</b> | <b>8</b> |
| 120                       | -20.7         | -     | -16.1 | -16.0 | -15.7 | -12.9 | -26.3 | -19.7 | <b>-18.2 ± 4.4</b> | <b>7</b> |
| 150                       | -22.7         | -     | -18.8 | -12.5 | -18.8 | -15.7 | -14.7 | -14.7 | <b>-16.9 ± 3.5</b> | <b>7</b> |
| 180                       | -12.9         | -     | -16.2 | -12.3 | -14.0 | -14.4 | -17.4 | -17.5 | <b>-15.0 ± 2.1</b> | <b>7</b> |
| 210                       | -12.9         | -24.9 | -16.6 | -16.2 | -14.3 | -18.1 | -18.0 | -12.4 | <b>-16.7 ± 3.9</b> | <b>8</b> |
| 240                       | -14.3         | -16.8 | -21.2 | -24.3 | -31.8 | -17.6 | -19.9 | -16.3 | <b>-20.3 ± 5.6</b> | <b>8</b> |

Peak expiration flow (mL/sec)

| Time from treatment (min) | Animal number |      |      |      |      |      |      |      | Mean ± S.D.       | N        |
|---------------------------|---------------|------|------|------|------|------|------|------|-------------------|----------|
|                           | 2857          | 2858 | 2859 | 2860 | 2861 | 2862 | 2863 | 2864 |                   |          |
| -30                       | 11.9          | 19.6 | 12.7 | 20.1 | 19.7 | 15.1 | 14.1 | 14.4 | <b>16.0 ± 3.3</b> | <b>8</b> |
| -25                       | 10.8          | 12.4 | 13.2 | 10.1 | -    | 13.2 | 12.3 | 16.1 | <b>12.6 ± 1.9</b> | <b>7</b> |
| -20                       | 17.4          | 13.5 | 14.1 | 10.2 | -    | 14.8 | 15.8 | 12.2 | <b>14.0 ± 2.4</b> | <b>7</b> |
| -15                       | 17.7          | 20.2 | 17.9 | 11.4 | 15.6 | 10.0 | 10.7 | 16.3 | <b>15.0 ± 3.8</b> | <b>8</b> |
| -10                       | 11.3          | 12.5 | 15.4 | 10.8 | -    | 13.3 | 21.0 | 10.6 | <b>13.6 ± 3.7</b> | <b>7</b> |
| 0                         | 13.8          | 15.6 | 14.7 | 12.5 | 17.6 | 13.3 | 14.8 | 13.9 | <b>14.5 ± 1.6</b> | <b>8</b> |
| 30                        | 12.3          | 14.4 | 17.9 | 16.8 | 13.0 | 9.7  | 13.3 | 13.7 | <b>13.9 ± 2.6</b> | <b>8</b> |
| 60                        | 15.6          | 10.0 | 13.9 | 16.0 | 14.3 | 15.8 | 15.5 | 10.1 | <b>13.9 ± 2.5</b> | <b>8</b> |
| 90                        | 14.1          | 10.0 | 12.4 | 14.1 | 13.5 | 14.2 | 14.2 | 12.3 | <b>13.1 ± 1.5</b> | <b>8</b> |
| 120                       | 13.5          | -    | 22.3 | 10.7 | 21.0 | 10.7 | 16.2 | 16.4 | <b>15.8 ± 4.6</b> | <b>7</b> |
| 150                       | 13.4          | -    | 13.1 | 13.0 | 16.5 | 11.2 | 12.2 | 11.1 | <b>12.9 ± 1.8</b> | <b>7</b> |
| 180                       | 10.9          | -    | 18.8 | 11.2 | 13.2 | 10.8 | 15.7 | 13.4 | <b>13.4 ± 3.0</b> | <b>7</b> |
| 210                       | 11.8          | 15.1 | 13.2 | 12.9 | 16.8 | 12.8 | 15.2 | 10.7 | <b>13.6 ± 2.0</b> | <b>8</b> |
| 240                       | 14.5          | 13.8 | 17.4 | 13.4 | 17.6 | 12.2 | 14.5 | 11.3 | <b>14.4 ± 2.2</b> | <b>8</b> |

“-“ see text (point 6.4.1 Deviations from Protocol)

Appendix 1.4 – Fexinidazole, 1000 mg/kg PO

Inspiration time (msec)

| Time from treatment (min) | Animal number |      |      |      |      |      |      |      | Mean ± S.D.     | N        |
|---------------------------|---------------|------|------|------|------|------|------|------|-----------------|----------|
|                           | 2857          | 2858 | 2859 | 2860 | 2861 | 2862 | 2863 | 2864 |                 |          |
| -30                       | 261           | 209  | 225  | 195  | 124  | 186  | 270  | 241  | <b>214 ± 47</b> | <b>8</b> |
| -25                       | 284           | 235  | 230  | 214  | -    | 223  | 230  | 251  | <b>238 ± 23</b> | <b>7</b> |
| -20                       | 259           | 250  | 220  | 241  | -    | 241  | 239  | 299  | <b>250 ± 25</b> | <b>7</b> |
| -15                       | 206           | 227  | 270  | 241  | 155  | 223  | 231  | 257  | <b>226 ± 35</b> | <b>8</b> |
| -10                       | 255           | 239  | 220  | 237  | -    | 254  | 242  | 255  | <b>243 ± 13</b> | <b>7</b> |
| 0                         | 253           | 232  | 233  | 225  | 139  | 225  | 242  | 261  | <b>226 ± 37</b> | <b>8</b> |
| 30                        | 291           | 152  | 187  | 202  | 251  | 227  | 250  | 237  | <b>225 ± 43</b> | <b>8</b> |
| 60                        | 298           | 255  | 190  | 188  | 191  | 264  | 234  | 246  | <b>233 ± 41</b> | <b>8</b> |
| 90                        | 243           | 255  | 257  | 250  | 225  | 224  | 292  | 257  | <b>250 ± 22</b> | <b>8</b> |
| 120                       | 192           | -    | 245  | 194  | 238  | 248  | 183  | 214  | <b>216 ± 27</b> | <b>7</b> |
| 150                       | 185           | -    | 185  | 219  | 202  | 227  | 261  | 218  | <b>214 ± 27</b> | <b>7</b> |
| 180                       | 253           | -    | 189  | 226  | 240  | 224  | 221  | 213  | <b>224 ± 20</b> | <b>7</b> |
| 210                       | 286           | 139  | 194  | 214  | 229  | 217  | 211  | 225  | <b>214 ± 41</b> | <b>8</b> |
| 240                       | 246           | 226  | 158  | 159  | 134  | 197  | 208  | 228  | <b>194 ± 40</b> | <b>8</b> |

Expiration time (msec)

| Time from treatment (min) | Animal number |      |      |      |      |      |      |      | Mean ± S.D.      | N        |
|---------------------------|---------------|------|------|------|------|------|------|------|------------------|----------|
|                           | 2857          | 2858 | 2859 | 2860 | 2861 | 2862 | 2863 | 2864 |                  |          |
| -30                       | 457           | 248  | 294  | 277  | 614  | 369  | 567  | 262  | <b>386 ± 144</b> | <b>8</b> |
| -25                       | 484           | 438  | 369  | 395  | -    | 342  | 447  | 324  | <b>400 ± 59</b>  | <b>7</b> |
| -20                       | 339           | 410  | 334  | 389  | -    | 297  | 329  | 412  | <b>359 ± 45</b>  | <b>7</b> |
| -15                       | 335           | 326  | 321  | 348  | 300  | 308  | 371  | 339  | <b>331 ± 23</b>  | <b>8</b> |
| -10                       | 356           | 439  | 297  | 373  | -    | 330  | 334  | 349  | <b>354 ± 44</b>  | <b>7</b> |
| 0                         | 394           | 372  | 323  | 357  | 457  | 329  | 410  | 337  | <b>372 ± 46</b>  | <b>8</b> |
| 30                        | 331           | 383  | 241  | 275  | 290  | 279  | 333  | 382  | <b>314 ± 52</b>  | <b>8</b> |
| 60                        | 303           | 363  | 319  | 299  | 364  | 287  | 367  | 295  | <b>325 ± 34</b>  | <b>8</b> |
| 90                        | 283           | 429  | 352  | 323  | 228  | 330  | 337  | 326  | <b>326 ± 57</b>  | <b>8</b> |
| 120                       | 352           | -    | 297  | 471  | 250  | 307  | 499  | 336  | <b>359 ± 92</b>  | <b>7</b> |
| 150                       | 347           | -    | 323  | 312  | 349  | 345  | 350  | 333  | <b>337 ± 15</b>  | <b>7</b> |
| 180                       | 320           | -    | 254  | 266  | 314  | 331  | 375  | 383  | <b>320 ± 49</b>  | <b>7</b> |
| 210                       | 329           | 455  | 331  | 375  | 249  | 343  | 412  | 280  | <b>347 ± 67</b>  | <b>8</b> |
| 240                       | 423           | 437  | 239  | 295  | 307  | 332  | 392  | 424  | <b>356 ± 73</b>  | <b>8</b> |

Relaxation time (msec)

| Time from treatment (min) | Animal number |      |      |      |      |      |      |      | Mean ± S.D.     | N        |
|---------------------------|---------------|------|------|------|------|------|------|------|-----------------|----------|
|                           | 2857          | 2858 | 2859 | 2860 | 2861 | 2862 | 2863 | 2864 |                 |          |
| -30                       | 249           | 118  | 167  | 151  | 163  | 224  | 367  | 163  | <b>200 ± 79</b> | <b>8</b> |
| -25                       | 249           | 257  | 190  | 267  | -    | 201  | 304  | 183  | <b>236 ± 45</b> | <b>7</b> |
| -20                       | 191           | 222  | 195  | 236  | -    | 150  | 187  | 254  | <b>205 ± 35</b> | <b>7</b> |
| -15                       | 201           | 183  | 167  | 198  | 169  | 184  | 218  | 164  | <b>186 ± 19</b> | <b>8</b> |
| -10                       | 197           | 244  | 168  | 232  | -    | 168  | 184  | 197  | <b>198 ± 29</b> | <b>7</b> |
| 0                         | 217           | 205  | 177  | 217  | 166  | 186  | 252  | 192  | <b>201 ± 27</b> | <b>8</b> |
| 30                        | 198           | 200  | 137  | 150  | 171  | 173  | 197  | 212  | <b>180 ± 27</b> | <b>8</b> |
| 60                        | 151           | 215  | 173  | 178  | 220  | 156  | 216  | 175  | <b>185 ± 28</b> | <b>8</b> |
| 90                        | 170           | 271  | 187  | 169  | 137  | 178  | 178  | 173  | <b>183 ± 38</b> | <b>8</b> |
| 120                       | 226           | -    | 159  | 247  | 135  | 187  | 280  | 196  | <b>204 ± 50</b> | <b>7</b> |
| 150                       | 233           | -    | 197  | 139  | 197  | 219  | 210  | 223  | <b>203 ± 31</b> | <b>7</b> |
| 180                       | 187           | -    | 137  | 158  | 195  | 195  | 217  | 252  | <b>192 ± 37</b> | <b>7</b> |
| 210                       | 214           | 198  | 202  | 223  | 138  | 175  | 282  | 172  | <b>200 ± 43</b> | <b>8</b> |
| 240                       | 257           | 260  | 146  | 196  | 199  | 200  | 279  | 241  | <b>222 ± 44</b> | <b>8</b> |

“-“ see text (point 6.4.1 Deviations from Protocol)

***Appendix 2 Protocol and Amendment***

### ***Appendix 3 Pharmacy Certification***



**PHARMACY CERTIFICATION**

Pharm. Cert. 0509-2007

**TEST ARTICLE:** Fexinidazole  
**STUDY NUMBER:** 0509-2007  
**NOTEBOOK NUMBERS:** G0095

**DOCUMENTATION ENCLOSED IN THE NOTEBOOK:**

- A. Analysis certificate dated December 18, 2007 issued by Orgasynth Industries for Fexinidazole test item, raw material, Batch No. 3168-07-01/O
- B. Material safety data sheet issued by Orgasynth Industries for Fexinidazole
- C. Certificate of Analysis issued by Sigma-Aldrich for Tween® 80, raw material, Lot No. 1239316
- D. Certificate of Analysis issued by Sigma-Aldrich for Methylcellulose 400 cP, raw material, Lot No. 105K0074
- E. Label's photocopy of Acqua per preparazioni iniettabili (Bieffe Medital S.p.A.), raw material, Lot No. 07G0201

**ANALYTICAL DOCUMENTATION:**

Requests and Analytical Results issued by Accelera/ADMET/Preclinical Formulation and Bioanalysis & Analytical Control

**MATERIALS USED FOR THE STUDY:**

- 1. Fexinidazole test item, raw material, Batch No. 3168-07-01/O
- 2. Tween® 80, raw material, Lot No. 1239316
- 3. Methylcellulose 400 cP, raw material, Lot No. 105K0074
- 4. Acqua per preparazioni iniettabili, raw material, Lot No. 07G0201

**PREPARATIONS:**

Prepare suspension of Fexinidazole test item, raw material, Lot No. 3168-07-01/O in the vehicle (5% Tween® 80 in 0.5% Methylcellulose 400 cP solution) at the concentration of 5 mg/mL, 15 mg/mL and 50 mg/mL

**CONCENTRATION CHECKS: (ACCURACY LIMITS: ± 10% OF LABELED AMOUNT)**

| <b>Fexinidazole suspensions</b> | <b>Preparation date</b>       | <b>Request No.</b>    | <b>% of L.A.</b> |
|---------------------------------|-------------------------------|-----------------------|------------------|
| 5 mg/mL - TOP                   | 2 <sup>nd</sup> February 2008 | Request No. 200800024 | 104.66           |
| 5 mg/mL - MIDDLE                | 2 <sup>nd</sup> February 2008 | Request No. 200800025 | 98.20            |
| 5 mg/mL - BOTTOM                | 2 <sup>nd</sup> February 2008 | Request No. 200800026 | 105.70           |
| 15 mg/mL - TOP                  | 2 <sup>nd</sup> February 2008 | Request No. 200800021 | 101.80           |
| 15 mg/mL - MIDDLE               | 2 <sup>nd</sup> February 2008 | Request No. 200800022 | 101.09           |
| 15 mg/mL - BOTTOM               | 2 <sup>nd</sup> February 2008 | Request No. 200800023 | 100.60           |
| 50 mg/mL - TOP                  | 2 <sup>nd</sup> February 2008 | Request No. 200800018 | 94.52            |
| 50 mg/mL - MIDDLE               | 2 <sup>nd</sup> February 2008 | Request No. 200800019 | 102.76           |
| 50 mg/mL - BOTTOM               | 2 <sup>nd</sup> February 2008 | Request No. 200800020 | 97.49            |

**STABILITY:**

**Fexinidazole test item:**

Expire date October 2008 for Fexinidazole, test item, raw material, Lot No. 3168-07-01/O if stored at room temperature protected from light

**Fexinidazole suspensions:**

Stability data indicate that Fexinidazole suspensions in the vehicle (5% Tween® 80 in 0.5% Methylcellulose 400 cP solution) in the range 0.5-100 mg/mL are stable up to 7 days at room temperature and 14 days at +4°C (Nerviano MS 0293-2007-R)

Prepared by:

11<sup>th</sup> March 2008
