# Supplementary material for: Fexinidazole – A New Oral Nitroimidazole Drug Candidate Entering Clinical Development for the Treatment of Sleeping Sickness
Source: PubMed Central journal article supplement (PMC3006138; doi:10.1371/journal.pntd.0000923), 2010-12-21
Supplement: pntd.0000923.s017.pdf [file pntd.0000923.s017.pdf]

## **Fexinidazole: 28-Day Oral Toxicity Study in the Rat**

|                              |                |
|------------------------------|----------------|
| Product Name :               | Fexinidazole   |
| Study Number:                | 0504-2007      |
| Study Director/Author:       |                |
| Sponsor Reference Study No.: | Not applicable |
| Status:                      | Final          |

## SUMMARY

### Methods

Fexinidazole, a 5-nitroimidazole derivative biologically active against *Trypanosoma* parasites (*T.b. rhodesiense* and *T.b. brucei*), was administered orally by gavage once daily for 28 consecutive days to ten or fifteen Crl:CD (SD)IGS BR rats/sex/group at doses of 50, 200 and 800 mg/kg/day in a volume of 10 mL/kg.

A control group received the vehicle alone (5% Tween 80 in 0.5% Methyl cellulose 400 cP (Methocel) suspension).

Ten animals/sex/group were sacrificed at the end of the treatment period on Day 29 or 30 of study. The remaining 5 animals/sex in the control and high-dose groups were sacrificed on Day 43 at the end of a two-week observation period.

Mortality, behavior and general condition were observed daily. Body weight was recorded pretest, and on Days 1, 8, 14, 21, 28, 35 and 42. Food consumption was recorded from Days 1 to 8, 8 to 14, 14 to 21, 21 to 28, 29 to 35 and 35 to 42. Ophthalmoscopy was performed pre-test, and on Days 28 and 42. Hematological and clinical chemistry examinations and urine analysis were performed on Days 29 and 43.

Post-mortem examinations performed at the end of the treatment period (Day 29 or 30) or the recovery period (Day 43) included necropsy, organ weights and histological examination.

Systemic exposure information was obtained from three additional animals/sex/group on Days 1 and 14 at different time-points up to 24 hours after treatment and on Day 28 at different time-points up to 72 hours after treatment.

### Results

No compound-related mortality occurred in any group.

No meaningful clinical signs or changes in ophthalmoscopic examinations were seen.

A minimal to slight, dose-dependent reduction in mean body weight was seen in male animals at 200 and 800 mg/kg for the entire treatment period. When treatment was discontinued a tendency to recover was seen, but values did not reach those of the controls. No meaningful changes in body weight were seen in female animals during the treatment period. During the recovery period high-dose females showed a minimally reduced body weight gain in comparison with controls.

A dose-dependent, minimal to slight decrease in food consumption was seen in male animals at 200 and 800 mg/kg. An almost complete recovery occurred on Day 42 of study. No meaningful changes in food consumption were seen in female animals.

At hematology, clinical chemistry and urinalysis no clear treatment-related changes were recorded during the study.

At gross and histopathological examination, the most significant changes, which were considered a direct effect of the treatment indicative of adaptation, were observed in the liver at all doses with some dose-relationship. On gross examination the liver from females showed increases in mean absolute and relative weights, which were minimal at the doses of 50 and 200 mg/kg/day and more prominent and statistically significant in animals receiving 800 mg/kg/day. Minimal to slight hypertrophy (increase in cell size) of the centrilobular hepatocytes was observed histologically in almost all animals of both sexes, at all doses with scant dose-relationship, correlating in females with the liver weight increases. After recovery the weight increases regressed completely at the dose of 800 mg/kg/day and the hepatocellular hypertrophy showed partial significant regression in terms of both incidence and severity in both sexes.

After the first and repeated dosing Fexinidazole was extensively metabolized to the sulfone and sulfoxide derivatives.

After the first and repeated administrations of the three dose levels, C<sub>max</sub> and AUCs of Fexinidazole were two to three times higher in females than in males. No relevant gender difference was detected for metabolites on Day 1, except at the low dose of 50 mg/kg. On Days 14 and 28 no relevant gender difference was detected for the sulfone metabolite while C<sub>max</sub> and AUCs of the sulfoxide metabolite were two to three times higher in females than in males.

On Days 1, 14 and 28, in both genders, AUCs of Fexinidazole and its metabolites increased with the dose administered.

Day 1 and Day 28 mean  $\pm$ SD systemic exposure to Fexinidazole is reported in the following table.

| Doses of Fexinidazole (mg/kg/day) | Day 1                               |                  | Day 28                              |                                  |
|-----------------------------------|-------------------------------------|------------------|-------------------------------------|----------------------------------|
|                                   | AUC <sub>0-t</sub> (last) (ng·h/mL) |                  | AUC <sub>0-t</sub> (last) (ng·h/mL) |                                  |
|                                   | M                                   | F                | M                                   | F                                |
| 50                                | 178 $\pm$ 99                        | 759 $\pm$ 153    | 889 $\pm$ 287                       | 1447 $\pm$ 335 <sup>(1)</sup>    |
|                                   |                                     |                  |                                     | 1630 $\pm$ 570                   |
| 200                               | 1120 $\pm$ 708                      | 3200 $\pm$ 856   | 2326 $\pm$ 1757 <sup>(1)</sup>      | 4437 $\pm$ 514 <sup>(1)</sup>    |
|                                   |                                     |                  | 4410 $\pm$ 3980                     | 4750 $\pm$ 508                   |
| 800                               | 10000 $\pm$ 2160                    | 15700 $\pm$ 3610 | 3173 $\pm$ 734 <sup>(1)</sup>       | 7640 $\pm$ 1782 <sup>(1,2)</sup> |
|                                   |                                     |                  | 11900 $\pm$ 5360                    | 7940 $\pm$ 2210 <sup>(2)</sup>   |

(1) AUC within 24 hours post dosing  
(2) n=2

Day 1 and Day 28 mean  $\pm$ SD systemic exposure to the sulfoxide metabolite is reported in the following table.

| Doses of Fexinidazole (mg/kg/day) | Day 1                               |                    | Day 28                              |                                     |
|-----------------------------------|-------------------------------------|--------------------|-------------------------------------|-------------------------------------|
|                                   | AUC <sub>0-t</sub> (last) (ng·h/mL) |                    | AUC <sub>0-t</sub> (last) (ng·h/mL) |                                     |
|                                   | M                                   | F                  | M                                   | F                                   |
| 50                                | 7660 $\pm$ 2380                     | 23200 $\pm$ 5330   | 29467 $\pm$ 8919 <sup>(1)</sup>     | 53833 $\pm$ 15716 <sup>(1)</sup>    |
|                                   |                                     |                    | 30600 $\pm$ 10900                   | 78000 $\pm$ 23600                   |
| 200                               | 80500 $\pm$ 4310                    | 91400 $\pm$ 19700  | 122100 $\pm$ 29340 <sup>(1)</sup>   | 138333 $\pm$ 14189 <sup>(1)</sup>   |
|                                   |                                     |                    | 138000 $\pm$ 45000                  | 153000 $\pm$ 36900                  |
| 800                               | 366000 $\pm$ 113000                 | 453000 $\pm$ 84700 | 129733 $\pm$ 56812 <sup>(1)</sup>   | 291500 $\pm$ 40305 <sup>(1,2)</sup> |
|                                   |                                     |                    | 268000 $\pm$ 64100                  | 331000 $\pm$ 57300 <sup>(2)</sup>   |

(1) AUC within 24 hours post dosing  
(2) n=2

Day 1 and Day 28 mean  $\pm$ SD systemic exposure to the sulfone metabolite is reported in the following table.

| Doses of Fexinidazole (mg/kg/day) | Day 1                               |                     | Day 28                              |                                     |
|-----------------------------------|-------------------------------------|---------------------|-------------------------------------|-------------------------------------|
|                                   | AUC <sub>0-t</sub> (last) (ng·h/mL) |                     | AUC <sub>0-t</sub> (last) (ng·h/mL) |                                     |
|                                   | M                                   | F                   | M                                   | F                                   |
| 50                                | 16500 $\pm$ 9760                    | 55800 $\pm$ 28100   | 106267 $\pm$ 9530 <sup>(1)</sup>    | 174667 $\pm$ 40501 <sup>(1)</sup>   |
|                                   |                                     |                     | 113000 $\pm$ 13700                  | 197000 $\pm$ 50600                  |
| 200                               | 119000 $\pm$ 21900                  | 134000 $\pm$ 10800  | 341333 $\pm$ 39068 <sup>(1)</sup>   | 341333 $\pm$ 66124 <sup>(1)</sup>   |
|                                   |                                     |                     | 387000 $\pm$ 34000                  | 448000 $\pm$ 135000                 |
| 800                               | 465000 $\pm$ 264000                 | 683000 $\pm$ 241000 | 459000 $\pm$ 60605 <sup>(1)</sup>   | 571500 $\pm$ 54447 <sup>(1,2)</sup> |
|                                   |                                     |                     | 509000 $\pm$ 94900                  | 738000 $\pm$ 135000 <sup>(2)</sup>  |

(1) AUC within 24 hours post dosing  
(2) n=2

## Conclusions

Fexinidazole, given orally once daily for 28 consecutive days at doses of 50, 200 or 800 mg/kg/day to CrI:CD (SD)IGS BR rats, was well tolerated at all doses tested, inducing only minimal to slight decreases in body weight and food consumption in male animals at 200 and 800 mg/kg. The minimal to moderate changes observed in the liver of all fexinidazole-treated animals (increased liver weight and/or hypertrophy of the centrilobular hepatocytes) were restricted to dosing period and were considered of adaptative origin. Based on these results the dose of 200 mg/kg was considered the NOAEL. This dose corresponds on Day 28 to a mean AUC<sub>0-24</sub> of fexinidazole of 3173 or 7640 ng·h/mL in males and females respectively, a mean AUC<sub>0-24</sub> of sulfoxide metabolite of 129733 or 291500 ng·h/mL in males and females respectively, and a mean AUC<sub>0-24</sub> of sulfone metabolite of 459000 or 571500 ng·h/mL in males and females respectively.

**TABLE OF CONTENTS**

|                                                                           |    |
|---------------------------------------------------------------------------|----|
| 1. INTRODUCTION AND OBJECTIVES .....                                      | 11 |
| 2. STUDY SPONSOR .....                                                    | 11 |
| 3. TEST FACILITY .....                                                    | 11 |
| 4. REGULATORY REQUIREMENTS .....                                          | 11 |
| 5. SCHEDULE .....                                                         | 11 |
| 6. MATERIALS AND METHODS .....                                            | 12 |
| 6.1. Test and Control Items .....                                         | 12 |
| 6.1.1. Test Item .....                                                    | 12 |
| 6.1.2. Vehicle/Control Item .....                                         | 12 |
| 6.1.3. Test Formulation.....                                              | 13 |
| 6.1.4. Test Formulation Analyses .....                                    | 13 |
| 6.2. Test System .....                                                    | 13 |
| 6.2.1. Environmental Conditions .....                                     | 13 |
| 6.2.2. Allocation/Randomization .....                                     | 14 |
| 6.3. Experimental Design .....                                            | 14 |
| 6.3.1. Identification.....                                                | 15 |
| 6.3.2. Dose Administration .....                                          | 15 |
| 6.3.3. Dose Justification.....                                            | 15 |
| 6.4. Clinical and physical examinations.....                              | 16 |
| 6.5. Clinical Pathology .....                                             | 16 |
| 6.5.1. Hematology.....                                                    | 16 |
| 6.5.2. Clinical Chemistry .....                                           | 17 |
| 6.5.3. Urine Analysis .....                                               | 17 |
| 6.6. Postmortem Examinations.....                                         | 18 |
| 6.6.1. Unscheduled Deaths .....                                           | 18 |
| 6.6.2. Scheduled Necropsy, Tissue Collection, and Tissue Examination..... | 18 |
| 6.6.3. Tissue Preparation.....                                            | 20 |
| 6.6.4. Pathology Peer Review .....                                        | 20 |

---

|                                               |    |
|-----------------------------------------------|----|
| 6.7. Systemic Exposure .....                  | 20 |
| 7. DATA ACQUISITION .....                     | 21 |
| 8. STATISTICAL ANALYSIS .....                 | 21 |
| 8.1. Variables.....                           | 21 |
| 8.2. Methods.....                             | 21 |
| 9. ARCHIVING.....                             | 22 |
| 10. STUDY DEVIATIONS.....                     | 22 |
| 11. STUDY PERSONNEL.....                      | 22 |
| 12. RESULTS .....                             | 22 |
| 12.1. Clinical and Physical Examinations..... | 22 |
| 12.1.1. Mortality .....                       | 22 |
| 12.1.2. Clinical Signs.....                   | 23 |
| 12.1.3. Ophthalmoscopic examination .....     | 23 |
| 12.1.4. Body Weight .....                     | 23 |
| 12.1.5. Food Consumption.....                 | 23 |
| 12.2. Clinical Pathology .....                | 23 |
| 12.2.1. Hematology.....                       | 23 |
| 12.2.2. Clinical Chemistry .....              | 24 |
| 12.2.3. Urinalysis .....                      | 24 |
| 12.3. Postmortem Examinations.....            | 24 |
| 12.3.1. Organ Weights .....                   | 24 |
| 12.3.2. Gross Pathology.....                  | 25 |
| 12.3.3. Histopathology.....                   | 25 |
| 12.4. Systemic Exposure .....                 | 26 |
| 13. DISCUSSION.....                           | 29 |
| 14. CONCLUSIONS .....                         | 30 |
| 15. REFERENCES .....                          | 31 |

FIGURES

Figure 1: Mean Body Weight

Figure 2: Mean Food Consumption

---

**TABLES**

- Table 1 Clinical Signs
- Table 2 Body Weights
- Table 3 Food Consumption
- Table 4 Ophthalmoscopic Findings
- Table 5 Hematology
- Table 6 Clinical Chemistry
- Table 7 Urine Analysis - Quantitative
- Table 8 Urine Analysis - Macroscopic
- Table 9 Absolute Organ Weights
- Table 10 Relative Organ Weights
- Table 11 Gross Necropsy Observations
- Table 12 Microscopic Observations

**APPENDICES**

- Appendix 1 Clinical Signs
- Appendix 2 Body Weights
- Appendix 3 Food Consumption
- Appendix 4 Ophthalmoscopic Findings
- Appendix 5 Hematology
- Appendix 6 Clinical Chemistry
- Appendix 7 Urine Analysis
- Appendix 8 Absolute Organ Weights
- Appendix 9 Relative Organ Weights
- Appendix 10 Gross Necropsy and Microscopic Observations
- Appendix 11 Toxicokinetic Report
- Appendix 12 Pharmacy Documentation
- Appendix 13 Clinical Pathology Methods
- Appendix 14 Protocol and Amendment

## 1. INTRODUCTION AND OBJECTIVES

The purpose of this study (0504-2007) was to determine the potential toxicity of and systemic exposure to Fexinidazole when administered orally, by gavage, once a day for 28 consecutive days to Crl:CD (SD)IGS BR rats. Reversal of possible toxic effects was determined for control and high dose animals over a 2-week observation period. Systemic exposure information was obtained from animals that are similarly dosed for 28 consecutive days and were designated for the systemic exposure phase of the study.

Fexinidazole is a 5-nitroimidazole derivate, biologically active against Trypanosoma parasites (*T.b.rhodesiense* and *T.b. brucei*) and useful in the treatment of the Human African Trypanosomiasis (HAT), known as sleeping sickness.

## 2. STUDY SPONSOR

DNDi – Drugs for Neglected Diseases *Initiative*  
1 Place St Gervais  
CH – 1201 Geneva, Switzerland

## 3. TEST FACILITY

Accelera

## 4. REGULATORY REQUIREMENTS

This study was conducted in compliance with:

- Decreto Legislativo 2 Marzo 2007, No. 50;
- Organisation for Economic Co-operation and Development (OECD) Principles of Good Laboratory Practice (GLP) (as revised in 1997).

The methods employed in this study were those described in the "Standard Operating Procedures" of the laboratories involved.

## 5. SCHEDULE

|                         | Males                                | Females         |
|-------------------------|--------------------------------------|-----------------|
| Experimental Start Date | 1 February 2008 (Randomization date) |                 |
| Dose (Day 1)            |                                      |                 |
| Main study              | 5 February 2008                      | 7 February 2008 |
| Toxicokinetics          | 5 February 2008                      | 7 February 2008 |



|                                                            |                                     |                   |
|------------------------------------------------------------|-------------------------------------|-------------------|
| Last Dose (Day 28 or Day 29)                               | 3 or 4 March 2008                   | 5 or 6 March 2008 |
| Start of recovery (Day 29)                                 | 4 March 2008                        | 6 March 2008      |
| Necropsy Dosing Phase (Dosing Necropsy) (Day 29 or Day 30) | 4 or 5 March 2008                   | 6 or 7 March 2008 |
| Necropsy Recovery Phase (Recovery Necropsy) (Day 43)       | 18 March 2008                       | 20 March 2008     |
| In vivo Experimental Completion Date                       | Last day of necropsy; 20 March 2008 |                   |

## 6. MATERIALS AND METHODS

### 6.1. Test and Control Items

#### 6.1.1. Test Item

|                              |                                                |
|------------------------------|------------------------------------------------|
| Identification               | Fexinidazole                                   |
| Lot/Batch Number             | 3168-07-01/O                                   |
| Expiry                       | October 2008                                   |
| HPCL Purity (%),             | 100.2%                                         |
| Storage Conditions           | Room Temperature, protected from light         |
| Source and Manufacturer      | Centipharm (formerly Orgasynth Industries)     |
| Special Handling Precautions | According to MSDS (Material Safety Data Sheet) |

#### 6.1.2. Vehicle/Control Item

|                         |                                                                                           |                                                             |
|-------------------------|-------------------------------------------------------------------------------------------|-------------------------------------------------------------|
| Identification          | 5% Tween 80 in 0.5% Methyl cellulose 400 cP (Methocel) suspension, in water for injection |                                                             |
| Lot/Batch Number        | Tween 80                                                                                  | 1324202                                                     |
|                         | Methyl cellulose 400 cP                                                                   | -1st: 125K0196 in use up to Feb. 19, 2008<br>-2nd: 017K0087 |
|                         | Water for injection                                                                       | -1st: 07G0201 in use up to Feb. 19, 2008<br>-2nd: 07K1503   |
| Storage Conditions      | Room Temperature                                                                          |                                                             |
| Expiry                  | Tween 80                                                                                  | February 2011                                               |
|                         | Methyl cellulose 400 cP                                                                   | -1st: January 2009<br>-2nd: January 2010                    |
|                         | Water for injection                                                                       | -1st: July 2010<br>-2nd: November 2010                      |
| Source and Manufacturer | Tween 80                                                                                  | Sigma-Aldrich                                               |
|                         | Methyl cellulose 400 cP                                                                   | Sigma-Aldrich                                               |
|                         | Water for injection                                                                       | Bieffe Medical                                              |
| Method of Preparation   | On file at Accelera/Experimental ADMET/Preclinical Formulation                            |                                                             |

### 6.1.3. Test Formulation

|                          |                                                                   |
|--------------------------|-------------------------------------------------------------------|
| Type of Formulation      | 5% Tween 80 in 0.5% Methyl cellulose 400 cP (Methocel) suspension |
| Method of Preparation    | On file at Accelera/Experimental AMDET/Preclinical Formulation    |
| Frequency of Preparation | The solution was prepared according to the stability data         |
| Dose Concentrations      | 5, 20 and 80 mg/mL                                                |
| Storage Conditions       | Room temperature                                                  |
| Source and Manufacturer  | Accelera/ Experimental AMDET/Preclinical Formulation              |

### 6.1.4. Test Formulation Analyses

#### 6.1.4.1. Homogeneity and Concentration

Samples (top-middle-bottom, 5 mL each) of each dose suspension prepared for the first and the last week of treatment (week 1 and 4) were collected under stirring for fexinidazole concentration and homogeneity checks; 10 mL were taken also from the vehicle. After collection, samples were directly transferred at room temperature to Accelera/DMPK & ART/Bioanalysis and Analytical Control for analysis. The analyses were performed using a validated HPLC-UV method (NervianoMS report 0293-2007-R).

Values were found to be within acceptable limits ( $\pm 10\%$ ) according to the internal SOPs of Accelera - Nerviano Medical Sciences.

#### 6.1.4.2. Stability

Stability data indicated that Fexinidazole in 5% Tween 80 in 0.5% Methyl cellulose 400 cP (Methocel) suspension in the range 0.5-100 mg/mL is stable for 7 days at room temperature or for 14 days at  $+4^{\circ}\text{C}$  (NervianoMS report 0293-2007-R).

## 6.2. Test System

|                                      |                                                                                                                |
|--------------------------------------|----------------------------------------------------------------------------------------------------------------|
| Species/Strain or Breed, Source, Sex | Sprague Dawley rats supplied by Charles River Laboratories, Italia S.p.A., Via Indipendenza 11, Calco (Italy). |
| Justification of Species/Sex         | The rat has been used extensively in safety studies and a large amount of biological data is available.        |
| Age                                  | Approximately 6 weeks at the start of treatment                                                                |
| Weight                               | Males: range from 169.7 to 203.5 grams at pre-test<br>Females: range from 160.9 to 189.2 grams at pre-test     |
| Acclimation                          | At least 5 days                                                                                                |
| Selection Criteria                   | General condition and body weight                                                                              |

### 6.2.1. Environmental Conditions

|         |                                                                          |
|---------|--------------------------------------------------------------------------|
| Caging  | Makrolon, (42x26x15 cm). Animals were caged two or three/cage            |
| Room    | 108/B                                                                    |
| Bedding | Saw dust 700/2000 supplied by L.G. Packing Wood, s.n.c., Condove (Italy) |

|             |                                                                                                                                        |
|-------------|----------------------------------------------------------------------------------------------------------------------------------------|
| Temperature | 21.5° C +/- 1.5° C; monitored                                                                                                          |
| Humidity    | 55% +/- 15; monitored                                                                                                                  |
| Air         | Approximately twenty air changes per hour; monitored                                                                                   |
| Lighting    | Approximate 12-hour light, 12-hour dark cycle. The lighting cycle could be interrupted for performance of protocol-defined activities. |
| Water       | Municipal main, water available ad libitum                                                                                             |
| Diet        | 4RF21 GLP pellets ad libitum, supplied by Mucedola                                                                                     |

Actual conditions were continuously monitored and recorded, and records were retained. Release of each lot of feed by the manufacturers was based on analysis of composite samples of each lot, which met specifications set by the manufacturers. Water was periodically analyzed for chemical and microbial impurities. No contaminants were identified in the food or water which were expected to interfere with the results or conclusions of this study.

All the above environmental conditions, as well as all the procedures adopted throughout the study for housing and handling the animals, were in strict compliance with EEC and Italian Guidelines for Laboratory Animal Welfare.

### 6.2.2. Allocation/Randomization

The animals were selected and distributed into experimental groups using random number tables (Fisher and Yates). The randomization was performed during the pretest period on February 1, 2008 for all animals.

One male animal (No. 2846) assigned to satellite study group for toxicokinetic purposes, found dead on Day 2 of study, was replaced with another one taken from the same arrival batch of animals, in order to maintain the number of three animals/sex/group for subsequent blood samplings. The animal maintained the number 2846.

### 6.3. Experimental Design

The study was performed according to the following experimental scheme:

| Test Group | Dose (mg/kg/day)         | Volume (mL/kg/day) | Number of Animals/Group |         |          |         |               |         |
|------------|--------------------------|--------------------|-------------------------|---------|----------|---------|---------------|---------|
|            |                          |                    | Toxicology              |         |          |         | Toxicokinetic |         |
|            |                          |                    | Main Study              |         | Recovery |         | Males         | Females |
|            |                          |                    | Males                   | Females | Males    | Females |               |         |
| 1          | 0 (vehicle) <sup>a</sup> | 10                 | 10                      | 10      | 5        | 5       | -             | -       |
| 2          | 50                       | 10                 | 10                      | 10      | -        | -       | -             | -       |
| 3          | 200                      | 10                 | 10                      | 10      | -        | -       | -             | -       |
| 4          | 800                      | 10                 | 10                      | 10      | 5        | 5       | -             | -       |
| 5          | 0 (vehicle) <sup>a</sup> | 10                 | -                       | -       | -        | -       | 3             | 3       |
| 6          | 50                       | 10                 | -                       | -       | -        | -       | 3             | 3       |
| 7          | 200                      | 10                 | -                       | -       | -        | -       | 3             | 3       |
| 8          | 800                      | 10                 | -                       | -       | -        | -       | 3             | 3       |

a: 5% Tween 80 in 0.5% Methyl cellulose 400 cP (Methocel) suspension

Animals were treated orally, by gavage, daily for 28 consecutive days. At the end of treatment period all animals from groups 2 and 3 and the first ten animals in numerical order (survival permitting) from groups 1 and 4 were sacrificed; the remaining animals were allowed a two-week recovery period.

### 6.3.1. Identification

The animals were identified by numbered metal tags on the right ear and different nicks on the left ear. A color-coded cage card was affixed to each study animal's cage and indicated the study number, cage number, treatment start date, test article, animal number, sex and dose level.

| Test Group | Color Code      | Animal Identification |           |                       |           |                            |           |
|------------|-----------------|-----------------------|-----------|-----------------------|-----------|----------------------------|-----------|
|            |                 | Toxicology            |           |                       |           | Toxicokinetic <sup>a</sup> |           |
|            |                 | Main Study            |           | Recovery <sup>a</sup> |           |                            |           |
|            |                 | Males                 | Females   | Males                 | Females   | Males                      | Females   |
| 1          | White           | 2735-2744             | 2785-2794 | 2745-2749             | 2795-2799 | -                          | -         |
| 2          | Yellow          | 2750-2759             | 2800-2809 | -                     | -         | -                          | -         |
| 3          | Green           | 2760-2769             | 2810-2819 | -                     | -         | -                          | -         |
| 4          | Red             | 2770-2779             | 2820-2829 | 2780-2784             | 2830-2834 | -                          | -         |
| 5          | White - dashed  | -                     | -         | -                     | -         | 2835-2837                  | 2847-2849 |
| 6          | Yellow - dashed | -                     | -         | -                     | -         | 2838-2840                  | 2850-2852 |
| 7          | Green - dashed  | -                     | -         | -                     | -         | 2841-2843                  | 2853-2855 |
| 8          | Red - dashed    | -                     | -         | -                     | -         | 2844-2846                  | 2856-2858 |

<sup>a</sup> Survival permitting

### 6.3.2. Dose Administration

|                  |                                                                                                     |
|------------------|-----------------------------------------------------------------------------------------------------|
| Method and Route | Os, gavage                                                                                          |
| Duration         | 28 days                                                                                             |
| Frequency        | Once daily, at approximately the same time                                                          |
| Volume           | 10 mL/kg/day; Individual dose volumes were calculated based on the most recent body weight recorded |
| Rate             | Not applicable                                                                                      |

### 6.3.3. Dose Justification

Doses were selected taking into account the results of previous repeated oral toxicity studies performed in the same species.

In a 7-day repeated toxicity study (NervianoMS Study 0339-2007) Fexinidazole given orally once daily at doses of 500, 1000 or 2000 mg/kg/day to Crl:CD (SD)IGS BR rats, was well

Nerviano Medical Sciences

Page 15 of 31

tolerated and did not cause meaningful toxicological changes at any dose tested, apart from a minimal to slight decrease in food consumption and minimal to slight changes in a few hematological parameters seen in both sexes at all doses tested.

In a 90-day repeated toxicity study (Hoechst Report 77.1238) Fexinidazole given orally once daily at the doses of 50, 200 and 800 mg/kg/day induced toxicological effects, albeit reversible, at the two highest doses of 200 and 800 mg/kg/day. At 800 mg/kg/day protracted impairment of body weight was seen even if associated with an increase in food consumption. At 200 and 800 mg/kg/day decreased erythrocyte counts and increases in bilirubin levels were seen. In addition, at 800 mg/kg/day an increase in reticulocyte count was also detected.

Evaluation of the pharmacokinetics after a 3-day oral administration to male Sprague Dawley rats (NMS Study No. 0513-2007) demonstrated that exposure did not increase significantly from 500 to 1000 mg/kg/day.

The oral route and daily administration schedule are those envisaged for clinical setting.

#### 6.4. Clinical and physical examinations

|                                       |                                                                                                                                    |
|---------------------------------------|------------------------------------------------------------------------------------------------------------------------------------|
| Survival and Moribundity Observations | At least once a day during the pre-test and test periods                                                                           |
| Clinical Signs                        | Every day, at least one session/day                                                                                                |
| Unscheduled Observations              | Upon evidence of changes in general appearance, overt signs of toxicity or evidence of moribundity                                 |
| Body Weights                          | Once pretest and on Days 1, 8, 14, 21, 28, 35 and 42                                                                               |
| Food Consumption                      | For Day-intervals 1 to 8, 8 to 14, 14 to 21, 21 to 28, 29 to 35 and 35 to 42.                                                      |
| Ophthalmoscopy                        | Pre-test, then on Day 28 (end of treatment period) for groups 1, 2, 3 and 4 and Day 42 (end of recovery period) for groups 1 and 4 |

#### 6.5. Clinical Pathology

##### 6.5.1. Hematology

|                      |                                                                                                                        |
|----------------------|------------------------------------------------------------------------------------------------------------------------|
| Collection Intervals | Day 29 (end of treatment period) for groups 1, 2, 3 and 4 and Day 43 (end of recovery period) for groups 1 and 4       |
| Number of Animals    | The last five animals in numerical order, i.e., the third five of groups 1 and 4 and the second five of groups 2 and 3 |
| Collection Site      | Retroorbital sinus plexus                                                                                              |
| Anesthesia           | Isoflurane                                                                                                             |
| Fasting Requirements | Overnight (about 16 hours)                                                                                             |
| Unscheduled Samples  | No further determinations and/or sampling times were added                                                             |
| Target Blood Volume  | 0.5 mL                                                                                                                 |
| Anticoagulant        | 8% EDTA solution                                                                                                       |

**Hematology Parameters Evaluated**

|                                           |                                                         |
|-------------------------------------------|---------------------------------------------------------|
| Red Blood Cells                           | Mean Corpuscular Volume reticulocytes                   |
| Hemoglobin                                | Mean Corpuscular Hemoglobin Concentration reticulocytes |
| Hematocrit                                | Mean Corpuscular Hemoglobin reticulocytes               |
| Mean Corpuscular Volume                   | Platelets                                               |
| Mean Corpuscular Hemoglobin               | Mean Platelet Volume                                    |
| Mean Corpuscular Hemoglobin Concentration | Platelet Distribution Width                             |
| Red Cell Distribution Width               | Platelet Hematocrit                                     |
| Hemoglobin Distribution Width             | White Blood Cells                                       |
| Reticulocyte Count (absolute and percent) | Differential White Blood Cells (absolute and percent)   |

**6.5.2. Clinical Chemistry**

|                      |                                                                                                                        |
|----------------------|------------------------------------------------------------------------------------------------------------------------|
| Collection Intervals | Day 29 (end of treatment period) for groups 1, 2, 3 and 4 and Day 43 (end of recovery period) for groups 1 and 4       |
| Number of Animals    | The last five animals in numerical order, i.e., the third five of groups 1 and 4 and the second five of groups 2 and 3 |
| Collection Site      | Retroorbital sinus plexus                                                                                              |
| Anesthesia           | Isoflurane                                                                                                             |
| Fasting Requirements | Overnight (about 16 hours)                                                                                             |
| Unscheduled Samples  | No further determinations and/or sampling times were added                                                             |
| Target Blood Volume  | 1 mL in tube for serum separation                                                                                      |
| Anticoagulant        | None                                                                                                                   |

**Clinical Chemistry Parameters Evaluated**

|                            |                                     |
|----------------------------|-------------------------------------|
| Urea                       | Albumin/Globulin Ratio (calculated) |
| Creatinine                 | Glucose                             |
| Alanine Aminotransferase   | Triglycerides                       |
| Aspartate Aminotransferase | Total Cholesterol                   |
| Alkaline Phosphatase       | Calcium                             |
| Gamma-glutamyltransferase  | Phosphorus                          |
| Total Bilirubin            | Sodium                              |
| Total Proteins             | Potassium                           |
| Albumin                    | Chloride                            |
| Globulin                   |                                     |

**6.5.3. Urine Analysis**

|                       |                                                                                                                        |
|-----------------------|------------------------------------------------------------------------------------------------------------------------|
| Collection Intervals  | Day 29 (end of treatment period) for groups 1, 2, 3 and 4 and Day 43 (end of recovery period) for groups 1 and 4       |
| Number of Animals     | The last five animals in numerical order, i.e., the third five of groups 1 and 4 and the second five of groups 2 and 3 |
| Method of Collection  | Metabolism cages. Before urine collection about 10 mL/kg of water were administered by gavage to each animal.          |
| Sample Requirements   | 1% Thimerosal (0,2 ml) in each bottle, before collection                                                               |
| Fasting Requirements  | Overnight (about 16 hours)                                                                                             |
| Unscheduled Samplings | No further determinations and/or sampling times were added                                                             |

**Urine Parameters Evaluated**

|                              |                                      |
|------------------------------|--------------------------------------|
| <b>Urinalysis Parameters</b> | Macroscopic appearance (description) |
| pH                           | Ketones                              |
| White Blood Cells            | Urobilinogen                         |
| Nitrites                     | Bilirubin                            |
| Proteins                     | Hemoglobin/Red Blood Cells           |
| Glucose                      | Specific gravity                     |

**6.6. Postmortem Examinations****6.6.1. Unscheduled Deaths**

Female No 2824 treated with 800 mg/kg/day, found dead on Day 14 of study, was necropsied at the earliest possible time. Tissues listed in Section 6.6.2 were collected from this animal and examined microscopically.

**6.6.2. Scheduled Necropsy, Tissue Collection, and Tissue Examination**

|                                         |                                                                                                                                                                                                                                              |
|-----------------------------------------|----------------------------------------------------------------------------------------------------------------------------------------------------------------------------------------------------------------------------------------------|
| Sacrifice Schedule                      | Day 29 or 30 (end of treatment period) and Day 43 (end of recovery period). Animals with scheduled sacrifice on Day 30 were treated for an additional day to allow histopathological investigations about 24 hours after the last treatment. |
| Number of Animals (survival permitting) | Day 29: the second 5 animals/sex group in numerical order<br>Day 30: the first 5 animals/sex group in numerical order<br>Day 43: the last five animals/sex for groups 1 and 4.                                                               |
| Method of Euthanasia                    | Sodium thiopental i.p. and abdominal exsanguination                                                                                                                                                                                          |
| Fasting Requirements                    | Overnight (about 16 hours)                                                                                                                                                                                                                   |
| Terminal Body Weight                    | All animals                                                                                                                                                                                                                                  |
| Macroscopic Examination                 | All animals                                                                                                                                                                                                                                  |

Organs/tissues from animals surviving at the end of the treatment period or recovery period were collected and examined microscopically (E) according to the following table. Paired organs were weighed together. Relative organ weights were calculated using the terminal fasted body weight of each animal.

| Organ/Tissue                   | Main study and Recovery animals |         | Examined (mg/kg/day)<br>Main study animals |    |     |     |
|--------------------------------|---------------------------------|---------|--------------------------------------------|----|-----|-----|
|                                | Collected                       | Weighed | 0                                          | 50 | 200 | 800 |
| Adrenal glands (both)          | X                               | X       | E                                          |    |     | E   |
| Aorta                          | X                               |         | E                                          |    |     | E   |
| Bone marrow smear <sup>a</sup> | X                               |         | E                                          |    |     | E   |
| Bone, sternum (with marrow)    | X                               |         | E                                          |    |     | E   |
| Brain <sup>c</sup>             | X                               | X       | E                                          |    |     | E   |
| Cecum                          | X                               |         | E                                          |    |     | E   |
| Colon                          | X                               |         | E                                          |    |     | E   |
| Duodenum                       | X                               |         | E                                          |    |     | E   |
| Diaphragm                      | X                               |         | E                                          |    |     | E   |

| Organ/Tissue                                          | Main study and Recovery animals |         | Examined (mg/kg/day)<br>Main study animals |    |     |     |
|-------------------------------------------------------|---------------------------------|---------|--------------------------------------------|----|-----|-----|
|                                                       | Collected                       | Weighed | 0                                          | 50 | 200 | 800 |
| Epididymides (both)                                   | X                               |         | E                                          |    |     | E   |
| Esophagus                                             | X                               |         | E                                          |    |     | E   |
| Eyes, optic nerve (both)                              | X                               |         | E                                          |    |     | E   |
| Femur                                                 | X                               |         | E                                          |    |     | E   |
| Harderian gland                                       | X                               |         | E                                          | E  | E   | E   |
| Heart                                                 | X                               | X       | E                                          |    |     | E   |
| Ileum                                                 | X                               |         | E                                          |    |     | E   |
| Jejunum                                               | X                               |         | E                                          |    |     | E   |
| Kidneys (both)                                        | X                               | X       | E                                          |    |     | E   |
| Liver <sup>c</sup>                                    | X                               | X       | E                                          | E  | E   | E   |
| Lungs                                                 | X                               |         | E                                          |    |     | E   |
| Lymph node, mandibular                                | X                               |         | E                                          |    |     | E   |
| Lymph node, mesenteric                                | X                               |         | E                                          |    |     | E   |
| Mammary gland                                         | X                               |         | E                                          |    |     | E   |
| Ovaries                                               | X                               | X       | E                                          |    |     | E   |
| Pancreas                                              | X                               |         | E                                          |    |     | E   |
| Pituitary                                             | X                               |         | E                                          |    |     | E   |
| Prostate                                              | X                               | X       | E                                          |    |     | E   |
| Salivary glands (mandibular, parotids)                | X                               |         | E                                          |    |     | E   |
| Sciatic nerve                                         | X                               |         | E                                          |    |     | E   |
| Seminal vesicles                                      | X                               |         | E                                          |    |     | E   |
| Skeletal muscle                                       | X                               |         | E                                          |    |     | E   |
| Skin                                                  | X                               |         | E                                          |    |     | E   |
| Spinal cord (cervical, thoracic)                      | X                               |         | E                                          |    |     | E   |
| Spleen                                                | X                               | X       | E                                          |    |     | E   |
| Stifle joint                                          | X                               |         | E                                          |    |     | E   |
| Stomach                                               | X                               |         | E                                          |    |     | E   |
| Testes (both)                                         | X                               | X       | E                                          |    |     | E   |
| Thymus                                                | X                               | X       | E                                          |    |     | E   |
| Thyroid glands (with parathyroid glands) <sup>b</sup> | X                               |         | E                                          |    |     | E   |
| Tongue                                                | X                               |         | E                                          |    |     | E   |
| Trachea                                               | X                               |         | E                                          |    |     | E   |
| Urinary bladder                                       | X                               |         | E                                          |    |     | E   |
| Uterus                                                | X                               |         | E                                          |    |     | E   |
| Vagina                                                | X                               |         | E                                          |    |     | E   |
| Lesions                                               | X                               |         | E                                          | E  | E   | E   |



| Organ/Tissue                                                                                                                                                                                                                                                                                                                                                         | Main study and Recovery animals |         | Examined (mg/kg/day) Main study animals |    |     |     |
|----------------------------------------------------------------------------------------------------------------------------------------------------------------------------------------------------------------------------------------------------------------------------------------------------------------------------------------------------------------------|---------------------------------|---------|-----------------------------------------|----|-----|-----|
|                                                                                                                                                                                                                                                                                                                                                                      | Collected                       | Weighed | 0                                       | 50 | 200 | 800 |
| Histological examination was performed on all tissues/organs from the high-dose female found dead and from rats of the control and high dose group killed at the end of the treatment period. Examination of the liver and Harderian glands was extended to the other dose-groups for terminally killed animals and to all groups for animals killed after recovery. |                                 |         |                                         |    |     |     |
| a Except from animals found dead<br>b Parathyroid glands examined microscopically if included in the section of thyroid glands<br>c Samples from brain and liver were frozen in liquid nitrogen and kept at -80°C for further possible analysis                                                                                                                      |                                 |         |                                         |    |     |     |
| Fixatives:<br>Bone Marrow Smears: Methanol-ether<br>All Other Tissues: 10% neutral buffered formalin                                                                                                                                                                                                                                                                 |                                 |         |                                         |    |     |     |

Toxicokinetic study animals found dead were subjected to necropsy for the purpose of determining a possible cause of death; however, tissues were not collected from these animals.

### 6.6.3. Tissue Preparation

Histological sections of all tissues listed in 6.6.2 were trimmed, embedded, sectioned, and stained with hematoxylin and erythrosine (further stains if needed). Bone marrow smears were prepared and stained with May Grünwald-Giemsa.

All organs/tissues were kept for any further test necessary.

### 6.6.4. Pathology Peer Review

A pathology peer review was conducted by Paola Della Torre. The signed Peer Review Report was archived with study raw data.

## 6.7. Systemic Exposure

The toxicokinetics of Fexinidazole and its metabolites M1 (sulfoxide) and M2 (sulfone) were evaluated in accordance with the collection schedule and procedures tabulated below. The bioanalysis was conducted by Accelera/DMPK & ART/Bioanalysis and Analytical Control.

|                        |                                                                                                                                       |
|------------------------|---------------------------------------------------------------------------------------------------------------------------------------|
| Dose Levels (Groups)   | Groups 5, 6, 7 and 8                                                                                                                  |
| Collection Intervals   | Days 1, 14 and 28                                                                                                                     |
| Collection Time Points | Days 1 and 14: Pre-dose, 30 minutes, 1, 2, 4, 8 and 24h after dosing<br><br>Day 28: Pre-dose, 1, 2, 4, 8, 24, 48 and 72h after dosing |

|                              |                                                                                                                                                                                                       |
|------------------------------|-------------------------------------------------------------------------------------------------------------------------------------------------------------------------------------------------------|
|                              | For controls, samples were taken pre-dose and at a representative time-point (2 hours).                                                                                                               |
| Animals/Time Point           | All                                                                                                                                                                                                   |
| Anesthesia                   | Isoflurane                                                                                                                                                                                            |
| Collection Volume per Sample | About 0.25 mL of blood/point.                                                                                                                                                                         |
| Collection Site              | Retroorbital sinus plexus                                                                                                                                                                             |
| Sample Requirements          | Blood was put in heparinized plastic tubes kept on an ice-water bath, then centrifuged (10 min, 1200g, +4°C). Two aliquots of about 50 µL of plasma were stored in a freezer at –80°C until analysis. |
| Disposition of Animals       | Euthanized after final blood collection, without necropsy                                                                                                                                             |

After blood collection, frozen plasma specimens were transferred in plastic boxes to Accelera/DMPK & ART/Bioanalysis and Analytical Control, Nerviano Medical Sciences. The samples were loaded according to Watson 6.4.0.04 (Thermo Fisher Scientific Waltham, MA, USA).

Plasma samples were analyzed for the quantitation of Fexinidazole and its two metabolites using a validated LC-MS-MS method by Accelera/DMPK & ART/Bioanalysis and Analytical Control group.

Toxicokinetic calculations were carried out by Accelera/Pharmacokinetics & Modeling/Pharmacokinetics group. Details of the analytical method and of calculation methods were included in the toxicokinetic final report (Appendix 11).

## 7. DATA ACQUISITION

Clinical observations, body weights, organ weights, gross necropsy observations, histopathologic findings, and dose administration documentation were directly entered into the Xybion Path/Tox System or were recorded on appropriate paper forms, and, if appropriate, later entered into the Xybion Path/Tox System. Clinical pathology data were processed according to Clinical Pathology Laboratories procedures.

## 8. STATISTICAL ANALYSIS

### 8.1. Variables

The following parameters were evaluated: body weights, clinical chemistry, hematology, urinalysis, organ weights, organ/terminal body weight ratios.

### 8.2. Methods

Dunnett's test, included in a customized Xybion package, was performed.

## 9. ARCHIVING

The original protocol, the protocol amendment, all raw data, supporting documents, and specimens produced at the Test Facility, and the final report with original signatures were filed in the Archives of Accelera, Nerviano Medical Sciences S.r.l., Nerviano (Italy) for the period of time agreed with the Sponsor (at least 3 years) after which the Sponsor will be contacted for instructions regarding dispatch or disposal of the material.

A copy of the protocol, the report with original signatures, a reserve sample and all relevant original documentation of the test item were filed by the Sponsor.

## 10. STUDY DEVIATIONS

The following deviations from protocol were recorded:

### Paragraph 5.3 Test System

Animal body weight range at pre-test was 169.7-203.5 grams for males and 160.9-189.2 grams for females instead of 180-200 grams at the beginning of the study as stated in the protocol.

### Paragraph 6.6.2 Scheduled Necropsy

On Day 29 of study the second five animals/sex/group in numerical order were sacrificed instead of the first five as stated in the protocol. On Day 30 the first 5 animals/sex/group in numerical order were sacrificed instead of the second 5 as stated in the protocol.

## 11. STUDY PERSONNEL

|  |  |
|--|--|
|  |  |
|  |  |
|  |  |
|  |  |
|  |  |
|  |  |
|  |  |
|  |  |

## 12. RESULTS

### 12.1. Clinical and Physical Examinations

#### 12.1.1. Mortality

No treatment-related deaths occurred during the study.

One accidental death occurred in one female (No. 2824) treated with Fexinidazole 800 mg/kg on Day 14 of study as a consequence of a faulty gavage during the last treatment performed on Day 13 (see also gross pathology and histopathology sections).

### 12.1.2. Clinical Signs

No treatment-related symptoms were observed in male or female animals at any dose tested.

### 12.1.3. Ophthalmoscopic examination

Ophthalmoscopic examinations performed at the end of the treatment and recovery periods did not reveal toxicological findings.

### 12.1.4. Body Weight

A dose-dependent reduction in mean body weight gain related to the first day of treatment was seen in male animals at 200 and 800 mg/kg for the entire treatment period. The reduction on Day 28 of study was considered minimal at 200 mg/kg (-11.3%) and slight at 800 mg/kg (-22.1%). Mean body weight showed the same trend, reaching statistical significance at the high dose from Day 8 up to the end of treatment. During the recovery period (control and high dose group) a tendency to recover was seen in high-dose males, but values did not reach those of the controls. On Day 42 mean body weight gain of high dose males was slightly reduced in comparison with controls (-17%).

No meaningful toxicological changes in body weight were seen in female animals during the treatment period. During the recovery period (control and high dose group) high dose females showed a minimally reduced body weight gain in comparison with controls (-8% on Day 42).

### 12.1.5. Food Consumption

A dose-dependent minimal to slight decrease in food consumption was seen in male animals of all Fexinidazole-treated groups. At 50 mg/kg/day the decrease was statistically significant only on Day 28 of study while statistical significance was attained from Day 8 to Day 28 at 200 and 800 mg/kg. An almost complete recovery occurred on Day 42 of study.

No meaningful changes in food consumption were seen in female animals.

## 12.2. Clinical Pathology

### 12.2.1. Hematology

A few alterations were observed in some hematological parameters throughout the study, but no clear treatment-related changes were recorded.

Minimal (8%) decreases in hemoglobin and moderate (about 46%) decreases in neutrophils were recorded in high-dose females on Day 29. Recovery occurred on Day 43. At this last sampling time a minimal (1.2- to 1.5-fold) increase in lymphocytes and monocytes was observed in females.

### 12.2.2. Clinical Chemistry

A few alterations in clinical chemistry values were observed, but these were considered secondary and not directly related to the compound.

A minimal to slight decrease in alkaline phosphatase was detected in all treated groups, with dose-relationship on Day 29 (-23 to -36% of control values in males, -11 to -34% of control values in females). In addition, minimal (1.1 to 1.5) increases in globulins (+13%) and total cholesterol (+51%) were recorded in high-dose females, along with a moderate decrease (-50%) in triglycerides in high-dosed males. At the same sampling time, phosphorus was slightly to moderately (1.3- to 1.7-fold) increased in high-dose males Nos. 2781, 2782, 2783.

On Day 43 a complete recovery occurred in all values apart from alkaline phosphatase, which recovered only partially in high-dose males.

### 12.2.3. Urinalysis

No clear treatment-related changes were recorded throughout the study.

A slight increase in white blood cells was recorded in high-dose males on Day 29. Recovery occurred on Day 43.

## 12.3. Postmortem Examinations

### 12.3.1. Organ Weights

#### End of treatment (Days 29-30)

The liver of females showed treatment-related increases in mean absolute and relative weights which were minimal at the doses of 50 and 200 mg/kg/day and more prominent and statistically significant in animals receiving 800 mg/kg/day. The percentage variations in comparison with controls are set out in the following table.

| Doses<br>(mg/kg/day) | LIVER |      |         |      |
|----------------------|-------|------|---------|------|
|                      | Males |      | Females |      |
|                      | Abs.  | Rel. | Abs.    | Rel. |
| 50                   | + 5   | + 10 | + 10    | + 8  |
| 200                  | + 3   | + 13 | + 13    | +10  |
| 800                  | + 6   | + 21 | + 36**  | +38  |

(\*\*) = Statistical significance at P = 0.01

### End of recovery (Day 43)

The increases in liver weights regressed completely in females receiving 800 mg/kg/day.

Other variations in mean weights sometimes noted in treated animals killed at termination or after recovery were considered to reflect either the individual variability observed also in controls or, only in males, some body weight decreases.

### 12.3.2. Gross Pathology

#### Unscheduled death

No treatment-related changes were seen in the high-dose female No 2824 found dead on Day 14 as a consequence of a faulty gavage during the last treatment performed on Day 13 (see also histopathology sections).

The main findings noted in this animal were represented by fairly good general condition, instead of good as in controls, and by the presence of abnormal content in the pleural cavity, consisting of clear liquid and soft yellow material (probably residual compound) adherent to the diaphragm and lungs.

#### End of treatment (Day 29 or 30) and of recovery (Day 43)

No treatment-related changes were noted in male and female animals killed either at termination at all doses or after recovery at the dose of 800 mg/kg/day.

Some findings noted in single instances, mainly in the group killed at termination after receiving 200 mg/kg/day, were considered unrelated to the treatment as they are known to occur, also on the basis of our experience, in untreated rats of the same strain and similar age. These changes, which are recorded in the "individual animal report", were mainly represented by encrusted or alopecic areas in the skin of both sexes and by clear content in the pleural cavity from a single female.

### 12.3.3. Histopathology

#### Unscheduled death

No treatment-related changes were noted in the high-dose female No 2824 that died on Day 14 as a consequence of a faulty gavage performed on Day 13. The main findings in this animal, graded as slight to marked, were characterized by: acute pleuritis, with abundant exudate in the pleural cavity, involving the lungs, the diaphragm, the thymus, the pericardium and the tissues adjacent to the aorta; lymphoid depletion of the thymus, spleen, mesenteric and mandibular lymph nodes; porphyrin deposits in the Harderian glands (graded

as marked); acinar hypertrophy of both salivary glands. The pleuritis, which was considered indicative of faulty gavage, correlated with the clear liquid noted in the pleural cavity on gross examination.

The other changes were considered mainly due to stress.

#### End of treatment (Days 29 and 30)

Changes considered as a direct effect of the treatment occurred in the liver as follows.

Liver. Minimal to slight hypertrophy of the centrilobular hepatocytes in almost all animals of both sexes at all doses, with scant dose-relationship, correlating for females with some weight increases noted on gross examination.

#### End of recovery (Day 43)

The liver changes showed some regression in high-dose animals as follows.

Liver. Minimal hypertrophy of centrilobular hepatocytes in two out of five males and in one female.

The slightly more prominent porphyrin deposits noted in the Harderian gland from treated animals when compared with controls, either at termination at all doses without dose-relationship or after recovery, were considered minor indirect effects of the treatment probably mediated by stress. As well as by the lack of dose-relationship, this hypothesis is supported by the presence of more prominent porphyrin deposits than those noted in animals killed at termination, in the high-dose female that died accidentally as a result of faulty gavage on Day 14.

The unilateral changes (hemorrhage/adenitis) noted in the Harderian glands from treated animals receiving 50 and 200 mg/kg/day killed at termination and from control and high dose animals killed after recovery were considered related to the blood sampling from the retroorbital sinus. All other changes noted in treated animals killed at termination were considered related to spontaneous pathology because they occurred with similar incidence and severity as in controls or because they are known to occur in our experience in untreated animals of the same strain and similar age.

## 12.4. Systemic Exposure

### Day 1

Mean  $\pm$ SD systemic exposure to Fexinidazole is reported in the following table

| Dose<br>mg/kg | Male  |      |              | Female |      |              |
|---------------|-------|------|--------------|--------|------|--------------|
|               | Cmax  | tmax | AUC0-t(last) | Cmax   | tmax | AUC0-t(last) |
|               | ng/mL | hour | ng-hour/mL   | ng/mL  | hour | ng-hour/mL   |

|     |           |     |            |          |     |            |
|-----|-----------|-----|------------|----------|-----|------------|
| 50  | 39±17     | 1±0 | 178±99     | 149±46   | 2±2 | 759±153    |
| 200 | 165±97    | 2±1 | 1120±708   | 604±211  | 2±2 | 3200±856   |
| 800 | 1478±1111 | 2±1 | 10000±2160 | 1483±200 | 2±1 | 15700±3610 |

At each dose,  $C_{max}$  and  $AUC_{0-t(last)}$  values were about three times higher in female than in male rats. In both genders, the maximal plasma concentrations of Fexinidazole were promptly achieved, on average within 2 hours post dosing. In both genders,  $AUC_{0-t(last)}$  values of Fexinidazole increased with the dose administered.

Mean  $\pm$ SD systemic exposure to the sulfoxide metabolite is reported in the following table

| Dose<br>mg/kg | Male               |                   |                                 | Female             |                   |                                 |
|---------------|--------------------|-------------------|---------------------------------|--------------------|-------------------|---------------------------------|
|               | $C_{max}$<br>ng/mL | $t_{max}$<br>hour | $AUC_{0-t(last)}$<br>ng·hour/mL | $C_{max}$<br>ng/mL | $t_{max}$<br>hour | $AUC_{0-t(last)}$<br>ng·hour/mL |
| 50            | 1503±413           | 2±1               | 7660±2380                       | 3893 ±663          | 3±1               | 23200±5330                      |
| 200           | 9987±2131          | 2±0               | 80500±4310                      | 12800±1127         | 3±1               | 91400±19700                     |
| 800           | 32833±4952         | 5±2               | 366000±113000                   | 30633±2616         | 4±0               | 453000±84700                    |

Mean  $\pm$ SD systemic exposure to the sulfone metabolite is reported in the following table

| Dose<br>mg/kg | Male               |                   |                                 | Female             |                   |                                 |
|---------------|--------------------|-------------------|---------------------------------|--------------------|-------------------|---------------------------------|
|               | $C_{max}$<br>ng/mL | $t_{max}$<br>hour | $AUC_{0-t(last)}$<br>ng·hour/mL | $C_{max}$<br>ng/mL | $t_{max}$<br>hour | $AUC_{0-t(last)}$<br>ng·hour/mL |
| 50            | 1417±393           | 7±2               | 16500±9760                      | 4417±2410          | 8±0               | 55800±28100                     |
| 200           | 8550±2309          | 8±0               | 119000±21900                    | 10023±815          | 8±0               | 134000±10800                    |
| 800           | 40300±1562         | 8±0               | 465000±264000                   | 44833±20128        | 13±9              | 683000±241000                   |

Apart from 50 mg/kg dose, no relevant gender difference in  $C_{max}$  and  $AUC_{0-t(last)}$  values of metabolites was observed. In both genders,  $t_{max}$  values of the sulfoxide metabolite were similar to the corresponding ones of the parent compound while  $t_{max}$  values of the sulfone metabolite were achieved at later times.

In both genders, the systemic exposure to the metabolites increased with the dose administered. The systemic exposure to the metabolites was much higher than that to the parent compound.

In male rats, the sulfoxide metabolite to parent  $AUC_{0-t(last)}$  ratios were, on average, 46, 107 and 37 after 50, 200 and 800 mg/kg, respectively; the corresponding values in females were 29, 30 and 28.

In male rats, the sulfone metabolite to parent  $AUC_{0-t(last)}$  ratios were, on average, 81, 172 and 46 after 50, 200 and 800 mg/kg, respectively; the corresponding values in females were 64, 40 and 39.

#### Repeated dosing

Day 14 and Day 28 mean  $\pm$ SD systemic exposure to Fexinidazole is reported in the following table

| Dose<br>mg/kg/day | Male               |                   |                                 | Female             |                   |                                 |
|-------------------|--------------------|-------------------|---------------------------------|--------------------|-------------------|---------------------------------|
|                   | $C_{max}$<br>ng/mL | $t_{max}$<br>hour | $AUC_{0-t(last)}$<br>ng·hour/mL | $C_{max}$<br>ng/mL | $t_{max}$<br>hour | $AUC_{0-t(last)}$<br>ng·hour/mL |
| Day 14            |                    |                   |                                 |                    |                   |                                 |
| 50                | 62±19              | 2±2               | 345±125                         | 300±91             | 2±1               | 1310±161                        |
| 200               | 274±163            | 3±1               | 2010±1520                       | 773±107            | 2±1               | 4030±215                        |



| 800                                            | 565±106 | 3±1 | 5120±1540                  | 1478±1115  | 3±4     | 13500±3620                       |
|------------------------------------------------|---------|-----|----------------------------|------------|---------|----------------------------------|
| Day 28                                         |         |     |                            |            |         |                                  |
| 50                                             | 133±24  | 4±0 | 889±287                    | 422±358    | 1±0     | 1447±335 (1)<br>1630±570         |
| 200                                            | 255±136 | 2±2 | 2326±1757 (1)<br>4410±3980 | 903±87     | 2±1     | 4437±514 (1)<br>4750±508         |
| 800                                            | 523±127 | 2±2 | 3173±734 (1)<br>11900±5360 | 749±90 (2) | 2±1 (2) | 7640±1782 (1,2)<br>7940±2210 (2) |
| (1) AUC within 24 hours post dosing<br>(2) n=2 |         |     |                            |            |         |                                  |

At each dose, C<sub>max</sub> and AUC<sub>0-t(last)</sub> values were two to three times higher in female than in male rats. No relevant difference in the Fexinidazole levels was observed on Day 28 compared to Day 14. On Days 14 and 28, in both genders, the maximal plasma concentrations of Fexinidazole were achieved, on average, within 4 hours post dosing. On Day 28, in males, mean ±SD apparent terminal half-lives were 4.7 ±1.2, 8.8 ±4.8 and 11 ±2.7 hours after 50, 200 and 800 mg/kg/day, respectively. The corresponding female half-lives were 5.1 ±5.1, 6.3 ±4.5 and 6.7 ±2.3 (n=2) hours. In both genders, AUC<sub>0-t(last)</sub> values of Fexinidazole increased with the dose.

Day 14 and Day 28 male AUC<sub>0-t(last)</sub> (AUC within 24 hours post dosing on Day 28) accumulation ratios were, on average, 2.2 and 5.7 after 50 mg/kg/day, 1.6 and 2 after 200 mg/kg/day and 0.5 and 0.3 after 800 mg/kg/day, respectively. The corresponding values in females were 1.7 and 2, 1.3 and 1.5, 0.9 and 0.4.

Day 14 and Day 28 mean ±SD systemic exposure to the sulfoxide metabolite is reported in the following table

| Dose<br>mg/kg/day                             | Male                      |                          |                                        | Female                    |                          |                                        |
|-----------------------------------------------|---------------------------|--------------------------|----------------------------------------|---------------------------|--------------------------|----------------------------------------|
|                                               | C <sub>max</sub><br>ng/mL | t <sub>max</sub><br>hour | AUC <sub>0-t(last)</sub><br>ng-hour/mL | C <sub>max</sub><br>ng/mL | t <sub>max</sub><br>hour | AUC <sub>0-t(last)</sub><br>ng-hour/mL |
| Day 14                                        |                           |                          |                                        |                           |                          |                                        |
| 50                                            | 2267±505                  | 2±2                      | 12500±4050                             | 8197±519                  | 2±0                      | 47100±4920                             |
| 200                                           | 13100±1044                | 3±1                      | 93600±27300                            | 18567±1266                | 3±1                      | 143000±34900                           |
| 800                                           | 17733±1701                | 3±1                      | 165000±29100                           | 32233±6435                | 2±0                      | 390000±159000                          |
| Day 28                                        |                           |                          |                                        |                           |                          |                                        |
| 50                                            | 4530±664                  | 3±1                      | 29467±8919 (1)<br>30600±10900          | 11413±6603                | 1±1                      | 53833±15716 (1)<br>78000±23600         |
| 200                                           | 11633±2403                | 3±1                      | 122100±29340 (1)<br>138000±45000       | 22333±1474                | 2±1                      | 138333±14189 (1)<br>153000±36900       |
| 800                                           | 16567±2079                | 2±1                      | 129733±56812 (1)<br>268000±64100       | 25850±2051(2)             | 3±1(2)                   | 291500±40305(1,2)<br>331000±57300(2)   |
| (1) AUC within 24 hours post dosing - (2) n=2 |                           |                          |                                        |                           |                          |                                        |

At each dose, the levels of the metabolite were about two to three times higher in the female than in the male rat. No relevant difference in the levels of the metabolite were observed on Day 28 compared to Day 14. In both genders, the maximal plasma concentrations of the sulfoxide metabolite were achieved, on average, 2 - 3 hours post dosing. On Day 28, mean ±SD male apparent terminal half-lives were 5 ±2, 6.3 ±2.9 and 6.6 ±4.1 hours after 50, 200 and 800 mg/kg/day, respectively, whilst the corresponding female half-lives were 6.1 ±3.8,

8.1 ±3.1 and 8.6 ±2.3 (n=2) hours. In both genders, the systemic exposure to the metabolite increased with the dose .

Day 14 and Day 28 male AUC<sub>0-t(last)</sub> (AUC within 24 hours post dosing on Day 28) accumulation ratios were, on average, 1.6 and 3.9 after 50 mg/kg/day, 1.2 and 1.5 after 200 mg/kg/day and 0.5 and 0.4 after 800 mg/kg/day, respectively. The corresponding values in females were 2.1 and 2.5, 1.6 and 1.5, 0.8 and 0.6.

The systemic exposure to the metabolite was much higher than that to the parent compound.

Day 14 and Day 28 mean ±SD systemic exposure to the sulfone metabolite is reported in the following table

| Dose<br>mg/kg/day | Male                      |                          |                                        | Female                    |                          |                                        |
|-------------------|---------------------------|--------------------------|----------------------------------------|---------------------------|--------------------------|----------------------------------------|
|                   | C <sub>max</sub><br>ng/mL | t <sub>max</sub><br>hour | AUC <sub>0-t(last)</sub><br>ng-hour/mL | C <sub>max</sub><br>ng/mL | t <sub>max</sub><br>hour | AUC <sub>0-t(last)</sub><br>ng-hour/mL |
| Day 14            |                           |                          |                                        |                           |                          |                                        |
| 50                | 4773±566                  | 4±0                      | 62800±11300                            | 7980±2285                 | 8±0                      | 116000±24900                           |
| 200               | 18800±1735                | 7±2                      | 268000±35800                           | 21533±2458                | 8±0                      | 306000±31200                           |
| 800               | 30833±1724                | 5±2                      | 423000±70500                           | 50233±11651               | 8±0                      | 664000±332000                          |
| Day 28            |                           |                          |                                        |                           |                          |                                        |
| 50                | 7750±831                  | 7±2                      | 106267±9530 (1)<br>113000±13700        | 10700±700                 | 7±2                      | 174667±40501 (1)<br>197000±50600       |
| 200               | 24200±3041                | 8±0                      | 341333±39068 (1)<br>387000±34000       | 21433±4179                | 8±0                      | 341333±66124 (1)<br>448000±135000      |
| 800               | 33000±6655                | 5±2                      | 459000±60605 (1)<br>509000±94900       | 41900±2970(2)             | 6±3(2)                   | 571500±54447(1,2)<br>738000±135000(2)  |

(1) AUC within 24 hours post dosing - (2) n=2

At each dose, no relevant gender difference in C<sub>max</sub> and AUC<sub>0-t(last)</sub> values was observed. No relevant difference in the levels of the metabolite were observed on Day 28 compared to Day 14. T<sub>max</sub> values of the metabolite were achieved at later times in comparison with the corresponding ones of the parent compound. On Day 28, mean male apparent terminal half-lives were 6.1 ±1.2, 7.5 ±2.4 and 10 ±3 hours after 50, 200 and 800 mg/kg/day, respectively, the corresponding half-lives in females were 13 ±9.8, 7.3 ±2.6 and 11 ±5.6 (n=2) hours. The systemic exposure to the metabolite increased with the dose.

Day 14 and Day 28 male AUC<sub>0-t(last)</sub> (AUC within 24 hours post dosing on Day 28) accumulation ratios were, on average, 5.2 and 9.3 after 50 mg/kg/day, 2.3 and 2.9 after 200 mg/kg/day and 1.3 and 1.6 after 800 mg/kg/day, respectively. The corresponding values in females were 2.3 and 3.8, 2.3 and 2.6, 1 and 0.8.

The systemic exposure to the metabolite was much higher than that to the parent compound.

### 13. DISCUSSION

Fexinidazole was administered orally by gavage once daily for 28 consecutive days to ten or fifteen CrI:CD (SD)IGS BR rats/sex/group at doses of 50, 200 and 800 mg/kg/day in a volume of 10 mL/kg.

Fexinidazole was well tolerated at all doses tested. No drug-related deaths occurred and no meaningful clinical signs were seen during the study. In addition, at hematology, clinical chemistry and urinalysis no clear treatment-related changes were recorded during the study.

Minimal to slight signs of toxicity were restricted to a dose-dependent, minimal to slight, reduction in body weight seen in male animals at 200 and 800 mg/kg for the entire treatment period which was concomitant with a dose-dependent minimal to slight decrease in food consumption. When treatment was discontinued a tendency to recover was seen both for body weight and food consumption although values on Day 42 remained below the control values. No meaningful toxicological changes in body weight and food consumption were seen in female animals during treatment period.

A direct effect of the treatment, indicative of adaptation, was observed in the liver at all doses with some dose-relationship. On gross examination the liver from females showed increases in mean absolute and relative weights, which were minimal at the doses of 50 and 200 mg/kg/day and more prominent and statistically significant in animals receiving 800 mg/kg/day. Minimal to slight hypertrophy (increase in cell size) of the centrilobular hepatocytes was observed histologically in almost all animals of both sexes, at all doses with scant dose-relationship. This finding correlated with the liver weight increases in females. After recovery the weight increases regressed completely at the dose of 800 mg/kg/day and the hepatocellular hypertrophy showed partial significant regression in terms of both incidence and severity in both sexes. Hepatocellular hypertrophy, may be indicative of adaptation, which, in itself, is not necessarily adverse unless associated with other more severe changes (e.g. degeneration, necrosis and hyperplasia)<sup>(1)</sup>.

After the first and repeated dosing in male and female rats Fexinidazole was extensively metabolized to the sulfone and sulfoxide derivatives.

On Days 1, 14 and 28, in both genders, AUCs of Fexinidazole and its metabolites increased with the dose administered.

After the first and repeated administrations of the three dose levels, C<sub>max</sub> and AUCs of Fexinidazole were two to three times higher in females than in males. No relevant gender differences were detected for metabolites on Day 1, except at the low dose of 50 mg/kg. On Days 14 and 28 no relevant gender differences were detected for the sulfone metabolite, while C<sub>max</sub> and AUCs of the sulfoxide metabolite were two to three times higher in females than in males. This may be indicative of a higher metabolic activity in females, with a consequent more marked increase in liver weight.

## 14. CONCLUSIONS

Fexinidazole, given orally once daily for 28 consecutive days at doses of 50, 200 or 800 mg/kg/day to CrI:CD (SD)IGS BR rats, was well tolerated at all doses tested inducing only minimal to slight decrease in body weight and food consumption in male animals at 200 and 800 mg/kg. The minimal to moderate changes observed in the liver of all fexinidazole-

treated animals (increased liver weight and/or hypertrophy of the centrilobular hepatocytes) were restricted to the dosing period and were considered of adaptative origin. Based on these results the dose of 200 mg/kg was considered the NOAEL. This dose on Day 28 corresponds to a mean AUC<sub>0-24</sub> of fexinidazole of 3173 or 7640 ng•h/mL in males and females, respectively, a mean AUC<sub>0-24</sub> of sulfoxide metabolite of 129733 or 291500 ng•h/mL in males and females, respectively, and a mean AUC<sub>0-24</sub> of sulfone metabolite of 459000 or 571500 ng•h/mL in males and females, respectively.

## 15. REFERENCES

<sup>(1)</sup> USEPA (2002) Hepatocellular hypertrophy. HED Guidance Document # G2002.01, October 21 (p.21-24)

## FIGURES

***Figure 1 Mean Body Weight***

Fig. 1: Mean Body Weight (g)

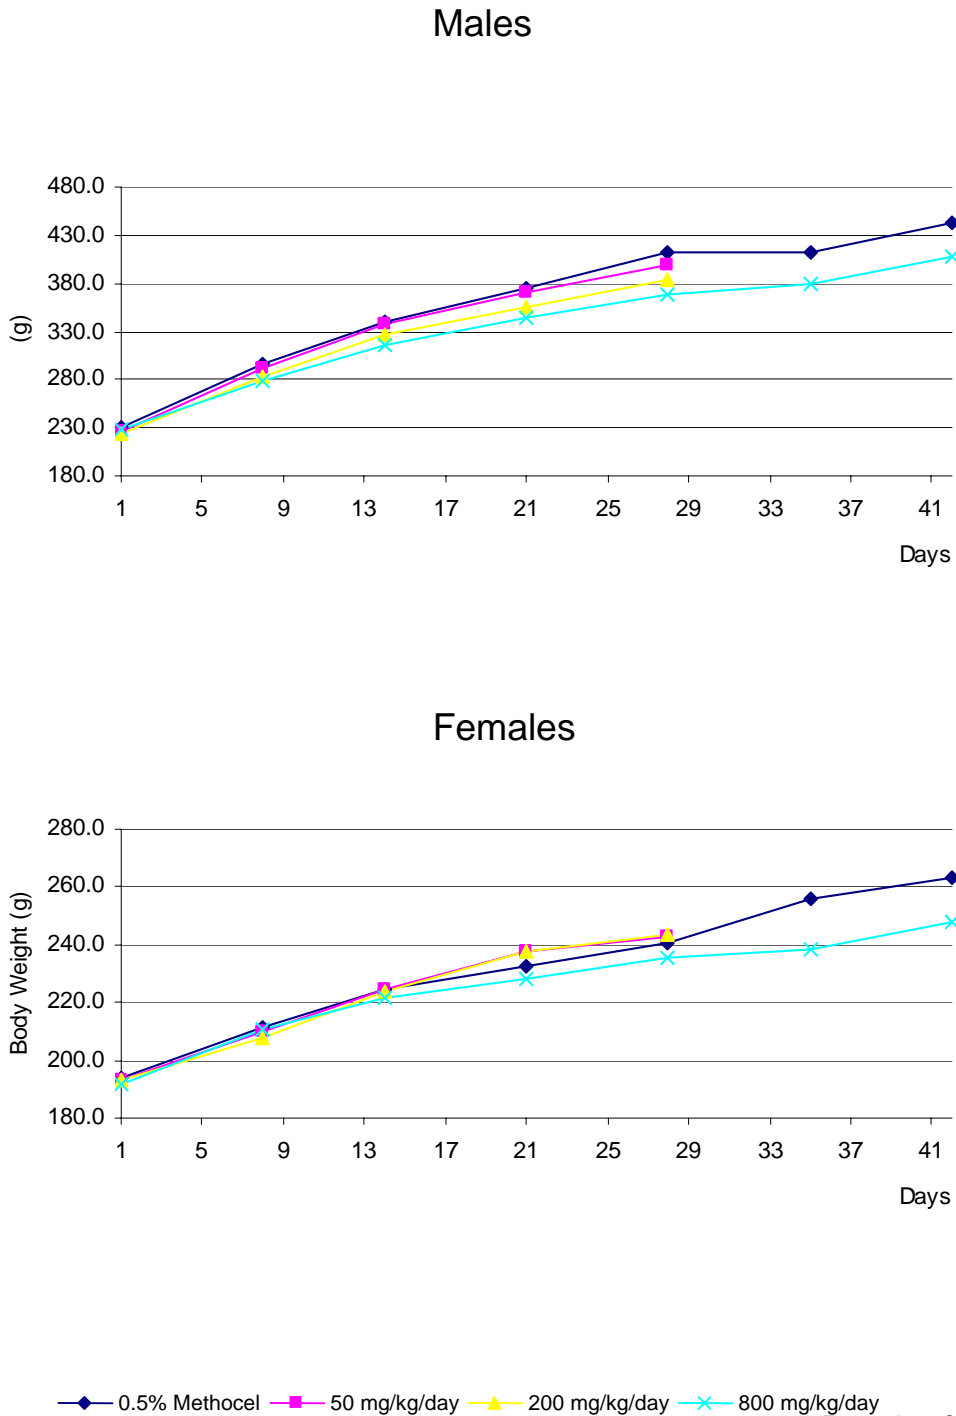

***Figure 2 Mean Food Consumption***



Fig. 2: Mean Food Consumption (g/rat/day)

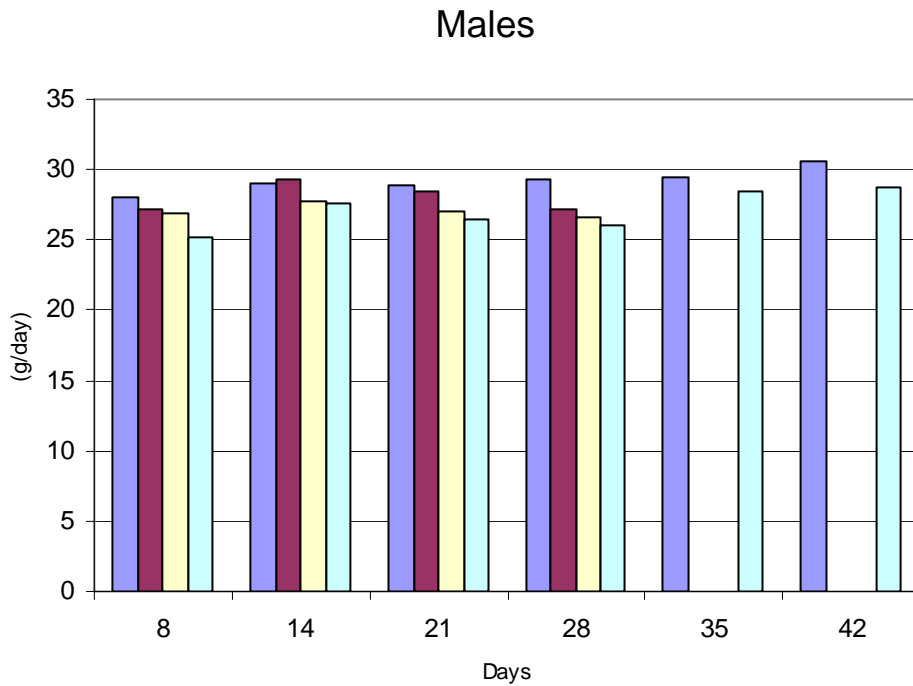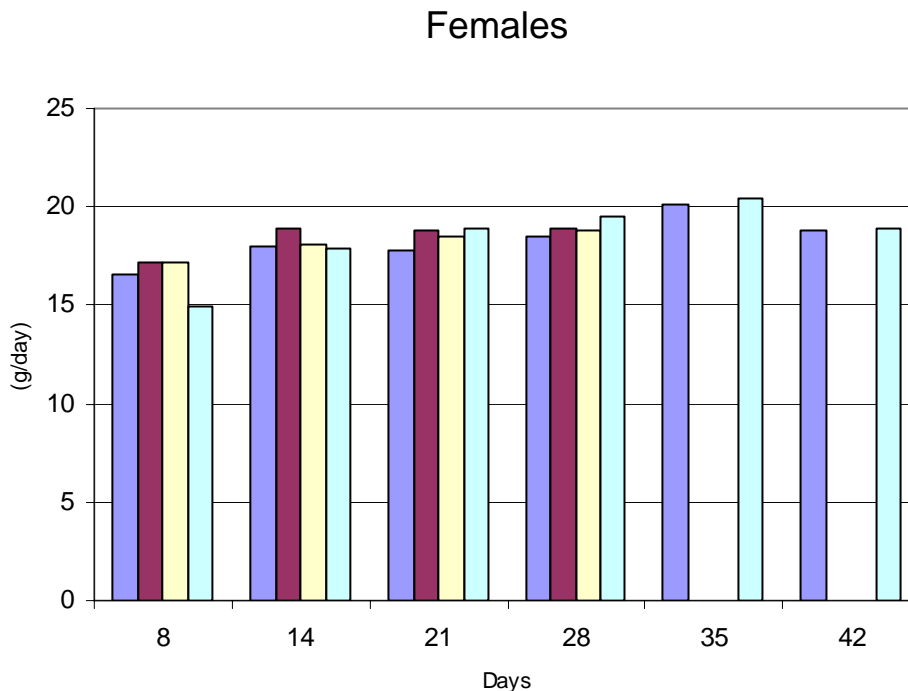

## **TABLES**

***Table 1 Clinical Signs***

CONFIDENTIAL

Table 1  
Group Incidence of Clinical Signs

Fexinidazole

Study Number: 0504-2007

| Study Days 1-43 | Group Number<br>Number of Animals+ | M a l e s        |        |         |                   |         |        |                   |        |  |
|-----------------|------------------------------------|------------------|--------|---------|-------------------|---------|--------|-------------------|--------|--|
|                 |                                    | 1<br>15          |        | 2<br>10 |                   | 3<br>10 |        | 4<br>15           |        |  |
|                 |                                    | a                | (b)    | a       | (b)               | a       | (b)    | a                 | (b)    |  |
| Normal          |                                    |                  |        |         |                   |         |        |                   |        |  |
|                 | Normal/no visible abnormalities    | 15               | (34.0) | 10      | (29.5)            | 10      | (28.3) | 15                | (34.0) |  |
| Body surface    |                                    |                  |        |         |                   |         |        |                   |        |  |
|                 | Accidental wound                   | 0                | (0.0)  | 0       | (0.0)             | 0       | (0.0)  | 0                 | (0.0)  |  |
|                 | Focal alopecia                     | 0                | (0.0)  | 0       | (0.0)             | 2       | (2.0)  | 0                 | (0.0)  |  |
|                 | Fur thinning                       | 0                | (0.0)  | 0       | (0.0)             | 0       | (0.0)  | 0                 | (0.0)  |  |
|                 | Scabbed area                       | 0                | (0.0)  | 0       | (0.0)             | 1       | (7.0)  | 0                 | (0.0)  |  |
|                 | Ulceration                         | 0                | (0.0)  | 0       | (0.0)             | 1       | (1.0)  | 0                 | (0.0)  |  |
| Group 1:vehicle |                                    | Group 2:50 mg/kg |        |         | Group 3:200 mg/kg |         |        | Group 4:800 mg/kg |        |  |

Key: + = Number of animals alive at start of interval  
a = Number of animals affected  
(b) = Mean number of animal days that the group displayed the sign

CONFIDENTIAL

Table 1  
Group Incidence of Clinical Signs

Fexinidazole

Study Number: 0504-2007

| Study Days 1-43                 | Group Number<br>Number of Animals+ | F e m a l e s     |        |         |        |                   |        |         |        |
|---------------------------------|------------------------------------|-------------------|--------|---------|--------|-------------------|--------|---------|--------|
|                                 |                                    | 1<br>15           |        | 2<br>10 |        | 3<br>10           |        | 4<br>15 |        |
|                                 |                                    | a                 | (b)    | a       | (b)    | a                 | (b)    | a       | (b)    |
| Normal                          |                                    |                   |        |         |        |                   |        |         |        |
| Normal/no visible abnormalities |                                    | 15                | (33.4) | 10      | (28.2) | 10                | (28.6) | 15      | (31.5) |
| Body surface                    |                                    |                   |        |         |        |                   |        |         |        |
| Accidental wound                |                                    | 0                 | (0.0)  | 2       | (6.5)  | 0                 | (0.0)  | 0       | (0.0)  |
| Focal alopecia                  |                                    | 0                 | (0.0)  | 0       | (0.0)  | 0                 | (0.0)  | 1       | (21.0) |
| Fur thinning                    |                                    | 1                 | (9.0)  | 0       | (0.0)  | 0                 | (0.0)  | 0       | (0.0)  |
| Scabbed area                    |                                    | 0                 | (0.0)  | 0       | (0.0)  | 1                 | (9.0)  | 0       | (0.0)  |
| Ulceration                      |                                    | 0                 | (0.0)  | 0       | (0.0)  | 0                 | (0.0)  | 0       | (0.0)  |
| Group 1:vehicle                 | Group 2:50 mg/kg                   | Group 3:200 mg/kg |        |         |        | Group 4:800 mg/kg |        |         |        |

Key: + = Number of animals alive at start of interval  
a = Number of animals affected  
(b) = Mean number of animal days that the group displayed the sign

***Table 2 Body Weights***

CONFIDENTIAL

Table 2  
Body Weights (g)

Fexinidazole

Study Number: 0504-2007

| Group Number | Dose Level | Study Day | M a l e s |        |         |         |         |         |        |        |
|--------------|------------|-----------|-----------|--------|---------|---------|---------|---------|--------|--------|
|              |            |           | -4"       | 1#     | 8       | 14      | 21      | 28      | 35     | 42     |
| 1            | vehicle    | N         | 15        | 15     | 15      | 15      | 15      | 15      | 5      | 5      |
|              |            | Mean      | 184.65    | 230.51 | 295.95  | 339.69  | 375.81  | 411.43  | 411.48 | 443.70 |
|              |            | Sdev      | 7.555     | 9.488  | 14.740  | 17.261  | 22.066  | 26.150  | 35.483 | 43.977 |
| 2            | 50 mg/kg   | N         | 10        | 10     | 10      | 10      | 10      | 10      | 0      | 0      |
|              |            | Mean      | 180.41    | 226.01 | 292.00  | 338.43  | 371.37  | 398.72  | -      | -      |
|              |            | Sdev      | 8.305     | 12.514 | 20.140  | 26.098  | 33.719  | 37.044  | -      | -      |
| 3            | 200 mg/kg  | N         | 10        | 10     | 10      | 10      | 10      | 10      | 0      | 0      |
|              |            | Mean      | 176.41    | 222.75 | 283.82  | 326.04  | 355.11  | 383.27  | -      | -      |
|              |            | Sdev      | 12.286    | 9.177  | 16.202  | 25.391  | 33.557  | 43.635  | -      | -      |
| 4            | 800 mg/kg  | N         | 15        | 15     | 15      | 15      | 15      | 15      | 5      | 5      |
|              |            | Mean      | 184.53    | 227.38 | 279.83+ | 316.42+ | 343.38+ | 368.37* | 379.10 | 407.84 |
|              |            | Sdev      | 9.253     | 11.692 | 15.294  | 24.025  | 30.076  | 33.944  | 26.169 | 30.210 |

Note: " = Pretest phase (groups); # = Test period

+ The group mean was significantly different from the control at p=0.05 with Dunnett's test of significance

\* The group mean was significantly different from the control at p=0.01 with Dunnett's test of significance

CONFIDENTIAL

Table 2  
Body Weights (g)

Fexinidazole

Study Number: 0504-2007

| Group Number | Dose Level | Study Day | F e m a l e s |        |        |        |        |        |        |        |   |
|--------------|------------|-----------|---------------|--------|--------|--------|--------|--------|--------|--------|---|
|              |            |           | -4"           | 1#     | 8      | 14     | 21     | 28     | 35     | 42     |   |
| 1            | vehicle    | N         | 15            | 15     | 15     | 15     | 15     | 15     | 15     | 5      | 5 |
|              |            | Mean      | 174.38        | 193.63 | 211.34 | 224.88 | 232.91 | 240.77 | 255.74 | 263.14 |   |
|              |            | Sdev      | 6.636         | 9.427  | 9.771  | 10.257 | 13.184 | 13.302 | 10.702 | 12.416 |   |
| 2            | 50 mg/kg   | N         | 10            | 10     | 10     | 10     | 10     | 10     | 10     | 0      | 0 |
|              |            | Mean      | 172.13        | 193.40 | 210.07 | 224.83 | 237.95 | 242.96 | -      | -      |   |
|              |            | Sdev      | 7.049         | 8.686  | 11.221 | 15.835 | 13.784 | 15.632 | -      | -      |   |
| 3            | 200 mg/kg  | N         | 10            | 10     | 10     | 10     | 10     | 10     | 10     | 0      | 0 |
|              |            | Mean      | 170.59        | 193.06 | 207.44 | 223.70 | 237.52 | 243.66 | -      | -      |   |
|              |            | Sdev      | 7.623         | 7.484  | 6.935  | 8.361  | 10.225 | 12.139 | -      | -      |   |
| 4            | 800 mg/kg  | N         | 15            | 15     | 15     | 14     | 14     | 14     | 14     | 5      | 5 |
|              |            | Mean      | 173.72        | 191.44 | 210.95 | 221.57 | 228.37 | 235.75 | 238.74 | 248.12 |   |
|              |            | Sdev      | 6.485         | 11.039 | 9.748  | 12.295 | 12.410 | 14.788 | 13.715 | 15.860 |   |

Note: " = Pretest phase (groups); # = Test period



***Table 3 Food Consumption***

CONFIDENTIAL

Table 3  
Feed Consumed per Day (g)

Fexinidazole

Study Number: 0504-2007

| Group Number | Dose Level | Study Day | M a l e s |        |        |        |       |       |
|--------------|------------|-----------|-----------|--------|--------|--------|-------|-------|
|              |            |           | 8         | 14     | 21     | 28     | 35    | 42    |
| 1            | vehicle    | N         | 15        | 15     | 15     | 15     | 5     | 5     |
|              |            | Mean      | 28.05     | 29.04  | 28.95  | 29.37  | 29.51 | 30.53 |
|              |            | Sdev      | 1.90      | 1.25   | 1.28   | 1.15   | 1.47  | 1.27  |
| 2            | 50 mg/kg   | N         | 10        | 10     | 10     | 10     | 0     | 0     |
|              |            | Mean      | 27.14     | 29.25  | 28.48  | 27.12* | -     | -     |
|              |            | Sdev      | 1.71      | 1.29   | 2.02   | 0.84   | -     | -     |
| 3            | 200 mg/kg  | N         | 10        | 10     | 10     | 10     | 0     | 0     |
|              |            | Mean      | 26.84+    | 27.72+ | 27.09+ | 26.65* | -     | -     |
|              |            | Sdev      | 0.62      | 1.55   | 1.89   | 1.66   | -     | -     |
| 4            | 800 mg/kg  | N         | 15        | 15     | 15     | 15     | 5     | 5     |
|              |            | Mean      | 25.18*    | 27.67  | 26.50+ | 25.97* | 28.50 | 28.78 |
|              |            | Sdev      | 1.54      | 3.51   | 3.45   | 2.87   | 3.08  | 2.50  |

Note: Data for Test period

+ The group mean was significantly different from the control at p=0.05 with Dunnett's test of significance

\* The group mean was significantly different from the control at p=0.01 with Dunnett's test of significance

CONFIDENTIAL

Table 3  
Feed Consumed per Day (g)

Fexinidazole

Study Number: 0504-2007

|              |            | Study Day | F e m a l e s |       |       |       |       |       |
|--------------|------------|-----------|---------------|-------|-------|-------|-------|-------|
| Group Number | Dose Level |           | 8             | 14    | 21    | 28    | 35    | 42    |
| 1            | vehicle    | N         | 15            | 15    | 15    | 15    | 5     | 5     |
|              |            | Mean      | 16.55         | 18.01 | 17.74 | 18.48 | 20.12 | 18.84 |
|              |            | Sdev      | 2.90          | 0.93  | 0.98  | 1.17  | 0.77  | 0.28  |
| 2            | 50 mg/kg   | N         | 10            | 10    | 10    | 10    | 0     | 0     |
|              |            | Mean      | 17.14         | 18.91 | 18.78 | 18.86 | -     | -     |
|              |            | Sdev      | 0.84          | 1.39  | 1.28  | 1.45  | -     | -     |
| 3            | 200 mg/kg  | N         | 10            | 10    | 10    | 10    | 0     | 0     |
|              |            | Mean      | 17.16         | 18.14 | 18.48 | 18.78 | -     | -     |
|              |            | Sdev      | 1.02          | 0.72  | 1.81  | 2.13  | -     | -     |
| 4            | 800 mg/kg  | N         | 15            | 15    | 14    | 14    | 5     | 5     |
|              |            | Mean      | 14.89         | 17.87 | 18.90 | 19.55 | 20.38 | 18.91 |
|              |            | Sdev      | 0.79          | 1.19  | 1.40  | 1.78  | 0.30  | 1.14  |

Note: Data for Test period

***Table 4 Ophthalmoscopic Findings***

CONFIDENTIAL

Table 4  
Incidence of Ophthalmoscopic Findings

Fexinidazole

Study Number: 0504-2007

| Study Day       | Group:                                | M a l e s        |    |                   |    |
|-----------------|---------------------------------------|------------------|----|-------------------|----|
|                 |                                       | 1                | 2  | 3                 | 4  |
| -2              | NORMAL /Normal (No Abnormal Findings) | 15               | 10 | 10                | 15 |
| 28              | NORMAL /Normal (No Abnormal Findings) | 15               | 10 | 10                | 15 |
| 42              | NORMAL /Normal (No Abnormal Findings) | 5                | 0  | 0                 | 5  |
| Group 1:vehicle |                                       | Group 2:50 mg/kg |    | Group 3:200 mg/kg |    |
|                 |                                       |                  |    | Group 4:800 mg/kg |    |

CONFIDENTIAL

Table 4  
Incidence of Ophthalmoscopic Findings

Fexinidazole

Study Number: 0504-2007

| Study Day       | Group:                                | 1                | Females<br>2 | 3                 | 4  |                   |  |
|-----------------|---------------------------------------|------------------|--------------|-------------------|----|-------------------|--|
| -2              | NORMAL /Normal (No Abnormal Findings) | 15               | 10           | 10                | 15 |                   |  |
| 28              | NORMAL /Normal (No Abnormal Findings) | 15               | 10           | 10                | 14 |                   |  |
| 42              | NORMAL /Normal (No Abnormal Findings) | 5                | 0            | 0                 | 5  |                   |  |
| Group 1:vehicle |                                       | Group 2:50 mg/kg |              | Group 3:200 mg/kg |    | Group 4:800 mg/kg |  |

***Table 5 Hematology***

CONFIDENTIAL

Table 5  
Day 29 Hematology Data  
Test period

Session 1 (Scheduled)  
Fexinidazole

Study Number: 0504-2007

| Parameter                               | Group Number:    | M a l e s         |       |       |                   | F e m a l e s |       |       |       |
|-----------------------------------------|------------------|-------------------|-------|-------|-------------------|---------------|-------|-------|-------|
|                                         |                  | 1                 | 2     | 3     | 4                 | 1             | 2     | 3     | 4     |
| RED BLOOD CELLS<br>10 <sup>6</sup> /mcL | N                | 5                 | 5     | 5     | 5                 | 5             | 5     | 5     | 5     |
|                                         | Mean             | 8.70              | 8.35  | 8.49  | 8.30              | 8.30          | 8.11  | 8.11  | 7.92  |
|                                         | Sdev             | 0.499             | 0.261 | 0.354 | 0.342             | 0.331         | 0.190 | 0.097 | 0.327 |
| HEMOGLOBIN<br>g/dL                      | N                | 5                 | 5     | 5     | 5                 | 5             | 5     | 5     | 5     |
|                                         | Mean             | 15.7              | 15.2  | 15.6  | 15.3              | 15.1          | 14.9  | 14.7  | 13.9* |
|                                         | Sdev             | 0.63              | 0.36  | 0.37  | 0.31              | 0.63          | 0.46  | 0.52  | 0.50  |
| HEMATOCRIT<br>%                         | N                | 5                 | 5     | 5     | 5                 | 5             | 5     | 5     | 5     |
|                                         | Mean             | 47.9              | 47.0  | 48.0  | 46.8              | 44.2          | 44.1  | 43.7  | 41.8  |
|                                         | Sdev             | 1.62              | 1.08  | 1.11  | 1.65              | 1.96          | 1.11  | 1.16  | 1.68  |
| MEAN CORPUSCULAR VOLUME<br>fL           | N                | 5                 | 5     | 5     | 5                 | 5             | 5     | 5     | 5     |
|                                         | Mean             | 55.1              | 56.4  | 56.7  | 56.4              | 53.3          | 54.5  | 53.9  | 52.8  |
|                                         | Sdev             | 1.83              | 1.67  | 2.28  | 0.38              | 1.44          | 1.18  | 1.11  | 1.06  |
| MEAN CORPUSCULAR HEMOGLOBIN<br>pg       | N                | 5                 | 5     | 5     | 5                 | 5             | 5     | 5     | 5     |
|                                         | Mean             | 18.0              | 18.3  | 18.3  | 18.5              | 18.2          | 18.3  | 18.1  | 17.6  |
|                                         | Sdev             | 0.75              | 0.66  | 0.78  | 0.48              | 0.57          | 0.36  | 0.51  | 0.39  |
| MEAN CORPUSCULAR HGB CONC.<br>g/dL      | N                | 5                 | 5     | 5     | 5                 | 5             | 5     | 5     | 5     |
|                                         | Mean             | 32.7              | 32.4  | 32.4  | 32.7              | 34.2          | 33.7  | 33.6  | 33.4+ |
|                                         | Sdev             | 0.52              | 0.28  | 0.49  | 0.68              | 0.36          | 0.36  | 0.60  | 0.51  |
| RED CELL DISTRIBUTION WIDTH<br>%        | N                | 5                 | 5     | 5     | 5                 | 5             | 5     | 5     | 5     |
|                                         | Mean             | 10.9              | 11.0  | 10.7  | 10.9              | 10.4          | 10.6  | 11.1+ | 10.9  |
|                                         | Sdev             | 0.29              | 0.44  | 0.47  | 0.50              | 0.22          | 0.38  | 0.53  | 0.49  |
| Group 1:vehicle                         | Group 2:50 mg/kg | Group 3:200 mg/kg |       |       | Group 4:800 mg/kg |               |       |       |       |

Group means without footnotes were not statistically different from the control at p=0.05 or p=0.01.

+ The group mean was significantly different from the control at p=0.05 with Dunnett's test of significance

\* The group mean was significantly different from the control at p=0.01 with Dunnett's test of significance



CONFIDENTIAL

Table 5  
Day 29 Hematology Data  
Test period

Session 1 (Scheduled)  
Fexinidazole

Study Number: 0504-2007

| Parameter                               | Group Number: | M a l e s        |       |       |                   | F e m a l e s |       |                   |       |  |
|-----------------------------------------|---------------|------------------|-------|-------|-------------------|---------------|-------|-------------------|-------|--|
|                                         |               | 1                | 2     | 3     | 4                 | 1             | 2     | 3                 | 4     |  |
| HEMOGLOBIN DISTRIB. WIDTH<br>g/dL       | N             | 5                | 5     | 5     | 5                 | 5             | 5     | 5                 | 5     |  |
|                                         | Mean          | 2.60             | 2.63  | 2.64  | 2.88+             | 2.30          | 2.45  | 2.56+             | 2.53  |  |
|                                         | Sdev          | 0.060            | 0.048 | 0.093 | 0.212             | 0.150         | 0.151 | 0.089             | 0.179 |  |
| RETICULOCYTES<br>%                      | N             | 5                | 5     | 5     | 5                 | 5             | 5     | 5                 | 5     |  |
|                                         | Mean          | 2.6              | 2.5   | 2.3   | 2.8               | 2.2           | 2.5   | 2.3               | 2.8   |  |
|                                         | Sdev          | 0.31             | 0.39  | 0.89  | 0.39              | 0.46          | 0.74  | 0.60              | 0.31  |  |
| RETICULOCYTES ABS<br>10 <sup>9</sup> /L | N             | 5                | 5     | 5     | 5                 | 5             | 5     | 5                 | 5     |  |
|                                         | Mean          | 223.4            | 205.0 | 189.3 | 233.4             | 179.4         | 202.2 | 189.9             | 218.1 |  |
|                                         | Sdev          | 17.46            | 29.01 | 66.54 | 31.22             | 31.60         | 55.68 | 47.06             | 23.88 |  |
| MEAN CORPUSCOLAR VOL. RETIC.<br>fL      | N             | 5                | 5     | 5     | 5                 | 5             | 5     | 5                 | 5     |  |
|                                         | Mean          | 62.2             | 63.9  | 64.1  | 63.9              | 61.2          | 63.7+ | 63.1              | 62.0  |  |
|                                         | Sdev          | 1.70             | 1.05  | 1.99  | 0.46              | 1.63          | 1.02  | 0.39              | 1.22  |  |
| MEAN HEMOGLOBIN CONC. RETIC.<br>g/dL    | N             | 5                | 5     | 5     | 5                 | 5             | 5     | 5                 | 5     |  |
|                                         | Mean          | 30.0             | 29.7  | 30.1  | 30.0              | 31.6          | 31.4  | 31.5              | 30.6* |  |
|                                         | Sdev          | 0.27             | 0.28  | 0.40  | 0.23              | 0.38          | 0.32  | 0.49              | 0.12  |  |
| CELLULAR HEMOGLOBIN RETIC.<br>pg        | N             | 5                | 5     | 5     | 5                 | 5             | 5     | 5                 | 5     |  |
|                                         | Mean          | 18.6             | 18.9  | 19.3  | 19.1              | 19.3          | 20.0  | 19.8              | 18.9  |  |
|                                         | Sdev          | 0.60             | 0.48  | 0.85  | 0.27              | 0.66          | 0.44  | 0.39              | 0.34  |  |
| PLATELETS<br>10 <sup>3</sup> /mcL       | N             | 5                | 5     | 5     | 5                 | 5             | 5     | 5                 | 5     |  |
|                                         | Mean          | 1234.            | 1411. | 1245. | 1300.             | 1299.         | 1108. | 1252.             | 1258. |  |
|                                         | Sdev          | 89.9             | 129.4 | 275.2 | 94.3              | 133.7         | 95.6  | 207.7             | 89.5  |  |
| Group 1:vehicle                         |               | Group 2:50 mg/kg |       |       | Group 3:200 mg/kg |               |       | Group 4:800 mg/kg |       |  |

Group means without footnotes were not statistically different from the control at p=0.05 or p=0.01.

+ The group mean was significantly different from the control at p=0.05 with Dunnett's test of significance

\* The group mean was significantly different from the control at p=0.01 with Dunnett's test of significance

CONFIDENTIAL

Table 5  
Day 29 Hematology Data  
Test period

Session 1 (Scheduled)  
Fexinidazole

Study Number: 0504-2007

| Parameter                                 | Group Number: | M a l e s        |       |       |                   | F e m a l e s |       |                   |       |  |
|-------------------------------------------|---------------|------------------|-------|-------|-------------------|---------------|-------|-------------------|-------|--|
|                                           |               | 1                | 2     | 3     | 4                 | 1             | 2     | 3                 | 4     |  |
| MEAN PLATELET VOLUME<br>fL                | N             | 5                | 5     | 5     | 5                 | 5             | 5     | 5                 | 5     |  |
|                                           | Mean          | 6.7              | 6.7   | 6.5   | 6.6               | 5.8           | 6.0   | 6.1               | 6.0   |  |
|                                           | Sdev          | 0.16             | 0.49  | 0.13  | 0.22              | 0.12          | 0.17  | 0.39              | 0.13  |  |
| PLATELET DISTRIBUTION WIDTH<br>%          | N             | 5                | 5     | 5     | 5                 | 5             | 5     | 5                 | 5     |  |
|                                           | Mean          | 54.9             | 52.7  | 54.6  | 54.9              | 53.2          | 52.7  | 53.4              | 53.1  |  |
|                                           | Sdev          | 2.71             | 1.10  | 2.07  | 0.91              | 2.26          | 2.29  | 2.44              | 1.85  |  |
| PLATELET HEMATOCRIT<br>%                  | N             | 5                | 5     | 5     | 5                 | 5             | 5     | 5                 | 5     |  |
|                                           | Mean          | 0.83             | 0.95  | 0.81  | 0.86              | 0.75          | 0.66  | 0.77              | 0.75  |  |
|                                           | Sdev          | 0.064            | 0.145 | 0.169 | 0.079             | 0.081         | 0.042 | 0.145             | 0.068 |  |
| WHITE BLOOD CELLS<br>10 <sup>3</sup> /mcL | N             | 5                | 5     | 5     | 5                 | 5             | 5     | 5                 | 5     |  |
|                                           | Mean          | 11.19            | 11.95 | 11.99 | 10.25             | 10.87         | 9.51  | 10.23             | 10.98 |  |
|                                           | Sdev          | 1.479            | 1.804 | 2.726 | 1.996             | 2.777         | 2.322 | 2.901             | 2.124 |  |
| NEUTROPHILS ABS<br>10 <sup>3</sup> /mcL   | N             | 5                | 5     | 5     | 5                 | 5             | 5     | 5                 | 5     |  |
|                                           | Mean          | 1.78             | 2.08  | 1.92  | 1.83              | 1.93          | 1.70  | 1.55              | 1.03  |  |
|                                           | Sdev          | 0.386            | 0.279 | 0.277 | 0.644             | 0.872         | 0.601 | 0.903             | 0.258 |  |
| LYMPHOCYTES ABS<br>10 <sup>3</sup> /mcL   | N             | 5                | 5     | 5     | 5                 | 5             | 5     | 5                 | 5     |  |
|                                           | Mean          | 8.83             | 9.20  | 9.46  | 7.86              | 8.35          | 7.21  | 8.12              | 9.43  |  |
|                                           | Sdev          | 1.153            | 1.670 | 2.609 | 1.475             | 1.888         | 2.246 | 2.280             | 2.064 |  |
| MONOCYTES ABS<br>10 <sup>3</sup> /mcL     | N             | 5                | 5     | 5     | 5                 | 5             | 5     | 5                 | 5     |  |
|                                           | Mean          | 0.32             | 0.32  | 0.30  | 0.28              | 0.29          | 0.30  | 0.28              | 0.26  |  |
|                                           | Sdev          | 0.157            | 0.054 | 0.007 | 0.021             | 0.094         | 0.064 | 0.038             | 0.077 |  |
| Group 1:vehicle                           |               | Group 2:50 mg/kg |       |       | Group 3:200 mg/kg |               |       | Group 4:800 mg/kg |       |  |

Group means without footnotes were not statistically different from the control at p=0.05 or p=0.01.

CONFIDENTIAL

Table 5  
Day 29 Hematology Data  
Test period

Session 1 (Scheduled)  
Fexinidazole

Study Number: 0504-2007

| Parameter                                         | Group Number: | M a l e s        |       |       |                   | F e m a l e s |       |                   |       |  |
|---------------------------------------------------|---------------|------------------|-------|-------|-------------------|---------------|-------|-------------------|-------|--|
|                                                   |               | 1                | 2     | 3     | 4                 | 1             | 2     | 3                 | 4     |  |
| EOSINOPHILS ABS<br>10 <sup>3</sup> /mcL           | N             | 5                | 5     | 5     | 5                 | 5             | 5     | 5                 | 5     |  |
|                                                   | Mean          | 0.10             | 0.13  | 0.13+ | 0.12              | 0.16          | 0.17  | 0.11              | 0.10  |  |
|                                                   | Sdev          | 0.011            | 0.026 | 0.027 | 0.055             | 0.027         | 0.062 | 0.021             | 0.031 |  |
| BASOPHILS ABS<br>10 <sup>3</sup> /mcL             | N             | 5                | 5     | 5     | 5                 | 5             | 5     | 5                 | 5     |  |
|                                                   | Mean          | 0.03             | 0.03  | 0.02  | 0.02              | 0.03          | 0.02* | 0.02              | 0.03  |  |
|                                                   | Sdev          | 0.008            | 0.005 | 0.011 | 0.011             | 0.000         | 0.005 | 0.011             | 0.004 |  |
| LARGE UNSTAINED CELLS ABS<br>10 <sup>3</sup> /mcL | N             | 5                | 5     | 5     | 5                 | 5             | 5     | 5                 | 5     |  |
|                                                   | Mean          | 0.14             | 0.19  | 0.16  | 0.13              | 0.12          | 0.11  | 0.15              | 0.14  |  |
|                                                   | Sdev          | 0.023            | 0.030 | 0.048 | 0.031             | 0.043         | 0.047 | 0.065             | 0.054 |  |
| NEUTROPHILS %                                     | N             | 5                | 5     | 5     | 5                 | 5             | 5     | 5                 | 5     |  |
|                                                   | Mean          | 15.8             | 17.7  | 16.5  | 17.7              | 17.1          | 18.7  | 15.0              | 9.6   |  |
|                                                   | Sdev          | 2.11             | 2.87  | 3.65  | 4.13              | 3.88          | 9.17  | 6.39              | 2.95  |  |
| LYMPHOCITES %                                     | N             | 5                | 5     | 5     | 5                 | 5             | 5     | 5                 | 5     |  |
|                                                   | Mean          | 79.0             | 76.6  | 78.2  | 76.8              | 77.4          | 74.9  | 79.4              | 85.6  |  |
|                                                   | Sdev          | 3.24             | 3.34  | 4.31  | 3.74              | 3.88          | 9.18  | 5.93              | 2.72  |  |
| MONOCYTES %                                       | N             | 5                | 5     | 5     | 5                 | 5             | 5     | 5                 | 5     |  |
|                                                   | Mean          | 2.8              | 2.7   | 2.6   | 2.8               | 2.7           | 3.3   | 2.8               | 2.4   |  |
|                                                   | Sdev          | 1.13             | 0.60  | 0.51  | 0.55              | 0.70          | 0.77  | 0.51              | 0.61  |  |
| EOSINOPHILS %                                     | N             | 5                | 5     | 5     | 5                 | 5             | 5     | 5                 | 5     |  |
|                                                   | Mean          | 0.8              | 1.1   | 1.1+  | 1.1               | 1.5           | 1.8   | 1.1               | 0.9   |  |
|                                                   | Sdev          | 0.11             | 0.40  | 0.08  | 0.31              | 0.31          | 0.52  | 0.11              | 0.39  |  |
| Group 1:vehicle                                   |               | Group 2:50 mg/kg |       |       | Group 3:200 mg/kg |               |       | Group 4:800 mg/kg |       |  |

Group means without footnotes were not statistically different from the control at p=0.05 or p=0.01.

+ The group mean was significantly different from the control at p=0.05 with Dunnett's test of significance

\* The group mean was significantly different from the control at p=0.01 with Dunnett's test of significance

CONFIDENTIAL

Table 5  
Day 29 Hematology Data  
Test period

Session 1 (Scheduled)  
Fexinidazole

Study Number: 0504-2007

| Parameter               | Group Number: | M a l e s        |      |                   |      | F e m a l e s     |      |      |      |
|-------------------------|---------------|------------------|------|-------------------|------|-------------------|------|------|------|
|                         |               | 1                | 2    | 3                 | 4    | 1                 | 2    | 3    | 4    |
| BASOPHILS %             | N             | 5                | 5    | 5                 | 5    | 5                 | 5    | 5    | 5    |
|                         | Mean          | 0.3              | 0.3  | 0.2               | 0.2  | 0.3               | 0.2  | 0.2  | 0.3  |
|                         | Sdev          | 0.05             | 0.05 | 0.04              | 0.04 | 0.08              | 0.04 | 0.08 | 0.05 |
| LARGE UNSTAINED CELLS % | N             | 5                | 5    | 5                 | 5    | 5                 | 5    | 5    | 5    |
|                         | Mean          | 1.2              | 1.6  | 1.3               | 1.3  | 1.1               | 1.1  | 1.4  | 1.3  |
|                         | Sdev          | 0.36             | 0.23 | 0.43              | 0.40 | 0.26              | 0.23 | 0.37 | 0.30 |
| Group 1:vehicle         |               | Group 2:50 mg/kg |      | Group 3:200 mg/kg |      | Group 4:800 mg/kg |      |      |      |

Group means without footnotes were not statistically different from the control at p=0.05 or p=0.01.

CONFIDENTIAL

Table 5  
Day 43 Hematology Data  
Test period

Session 1 (Scheduled)  
Fexinidazole

Study Number: 0504-2007

| Parameter                               | Group Number: | M a l e s        |   |   |                   | F e m a l e s |   |                   |       |  |
|-----------------------------------------|---------------|------------------|---|---|-------------------|---------------|---|-------------------|-------|--|
|                                         |               | 1                | 2 | 3 | 4                 | 1             | 2 | 3                 | 4     |  |
| RED BLOOD CELLS<br>10 <sup>6</sup> /mcL | N             | 5                | 0 | 0 | 5                 | 5             | 0 | 0                 | 5     |  |
|                                         | Mean          | 8.84             | - | - | 8.50              | 8.25          | - | -                 | 8.16  |  |
|                                         | Sdev          | 0.410            | - | - | 0.503             | 0.188         | - | -                 | 0.314 |  |
| HEMOGLOBIN<br>g/dL                      | N             | 5                | 0 | 0 | 5                 | 5             | 0 | 0                 | 5     |  |
|                                         | Mean          | 15.6             | - | - | 15.6              | 14.8          | - | -                 | 14.6  |  |
|                                         | Sdev          | 0.53             | - | - | 0.60              | 0.54          | - | -                 | 0.60  |  |
| HEMATOCRIT<br>%                         | N             | 5                | 0 | 0 | 5                 | 5             | 0 | 0                 | 5     |  |
|                                         | Mean          | 47.2             | - | - | 47.4              | 45.4          | - | -                 | 45.0  |  |
|                                         | Sdev          | 1.03             | - | - | 2.47              | 1.67          | - | -                 | 1.48  |  |
| MEAN CORPUSCULAR VOLUME<br>fL           | N             | 5                | 0 | 0 | 5                 | 5             | 0 | 0                 | 5     |  |
|                                         | Mean          | 53.4             | - | - | 55.8+             | 55.1          | - | -                 | 55.1  |  |
|                                         | Sdev          | 1.69             | - | - | 0.59              | 1.77          | - | -                 | 1.00  |  |
| MEAN CORPUSCULAR HEMOGLOBIN<br>pg       | N             | 5                | 0 | 0 | 5                 | 5             | 0 | 0                 | 5     |  |
|                                         | Mean          | 17.7             | - | - | 18.4              | 17.9          | - | -                 | 17.9  |  |
|                                         | Sdev          | 0.72             | - | - | 0.62              | 0.55          | - | -                 | 0.15  |  |
| MEAN CORPUSCULAR HGB CONC.<br>g/dL      | N             | 5                | 0 | 0 | 5                 | 5             | 0 | 0                 | 5     |  |
|                                         | Mean          | 33.1             | - | - | 32.9              | 32.5          | - | -                 | 32.4  |  |
|                                         | Sdev          | 0.56             | - | - | 0.74              | 0.24          | - | -                 | 0.44  |  |
| RED CELL DISTRIBUTION WIDTH<br>%        | N             | 5                | 0 | 0 | 5                 | 5             | 0 | 0                 | 5     |  |
|                                         | Mean          | 11.7             | - | - | 12.0              | 11.4          | - | -                 | 12.2* |  |
|                                         | Sdev          | 0.41             | - | - | 0.46              | 0.29          | - | -                 | 0.44  |  |
| Group 1:vehicle                         |               | Group 2:50 mg/kg |   |   | Group 3:200 mg/kg |               |   | Group 4:800 mg/kg |       |  |

Group means without footnotes were not statistically different from the control at p=0.05 or p=0.01.

+ The group mean was significantly different from the control at p=0.05 with Dunnett's test of significance

\* The group mean was significantly different from the control at p=0.01 with Dunnett's test of significance

CONFIDENTIAL

Table 5  
Day 43 Hematology Data  
Test period

Session 1 (Scheduled)  
Fexinidazole

Study Number: 0504-2007

| Parameter                               | Group Number: | M a l e s        |   |                   |        | F e m a l e s     |   |   |       |
|-----------------------------------------|---------------|------------------|---|-------------------|--------|-------------------|---|---|-------|
|                                         |               | 1                | 2 | 3                 | 4      | 1                 | 2 | 3 | 4     |
| HEMOGLOBIN DISTRIB. WIDTH<br>g/dL       | N             | 5                | 0 | 0                 | 5      | 5                 | 0 | 0 | 5     |
|                                         | Mean          | 2.67             | - | -                 | 2.80   | 2.31              | - | - | 2.34  |
|                                         | Sdev          | 0.101            | - | -                 | 0.125  | 0.143             | - | - | 0.080 |
| RETICULOCYTES<br>%                      | N             | 5                | 0 | 0                 | 5      | 5                 | 0 | 0 | 5     |
|                                         | Mean          | 2.5              | - | -                 | 3.3+   | 2.7               | - | - | 2.3   |
|                                         | Sdev          | 0.39             | - | -                 | 0.44   | 0.31              | - | - | 0.55  |
| RETICULOCYTES ABS<br>10 <sup>9</sup> /L | N             | 5                | 0 | 0                 | 5      | 5                 | 0 | 0 | 5     |
|                                         | Mean          | 223.2            | - | -                 | 277.3+ | 223.5             | - | - | 186.5 |
|                                         | Sdev          | 27.65            | - | -                 | 26.55  | 27.21             | - | - | 42.74 |
| MEAN CORPUSCOLAR VOL. RETIC.<br>fL      | N             | 5                | 0 | 0                 | 5      | 5                 | 0 | 0 | 5     |
|                                         | Mean          | 62.0             | - | -                 | 64.7+  | 64.8              | - | - | 64.5  |
|                                         | Sdev          | 1.78             | - | -                 | 0.95   | 1.75              | - | - | 1.06  |
| MEAN HEMOGLOBIN CONC. RETIC.<br>g/dL    | N             | 5                | 0 | 0                 | 5      | 5                 | 0 | 0 | 5     |
|                                         | Mean          | 30.3             | - | -                 | 30.6   | 30.5              | - | - | 30.0+ |
|                                         | Sdev          | 0.24             | - | -                 | 0.44   | 0.42              | - | - | 0.26  |
| CELLULAR HEMOGLOBIN RETIC.<br>pg        | N             | 5                | 0 | 0                 | 5      | 5                 | 0 | 0 | 5     |
|                                         | Mean          | 18.8             | - | -                 | 19.8+  | 19.7              | - | - | 19.3  |
|                                         | Sdev          | 0.59             | - | -                 | 0.51   | 0.73              | - | - | 0.40  |
| PLATELETS<br>10 <sup>3</sup> /mcL       | N             | 5                | 0 | 0                 | 5      | 5                 | 0 | 0 | 5     |
|                                         | Mean          | 1179.            | - | -                 | 1206.  | 1346.             | - | - | 1421. |
|                                         | Sdev          | 147.1            | - | -                 | 102.0  | 82.9              | - | - | 128.7 |
| Group 1:vehicle                         |               | Group 2:50 mg/kg |   | Group 3:200 mg/kg |        | Group 4:800 mg/kg |   |   |       |

Group means without footnotes were not statistically different from the control at p=0.05 or p=0.01.

+ The group mean was significantly different from the control at p=0.05 with Dunnett's test of significance

CONFIDENTIAL

Table 5  
Day 43 Hematology Data  
Test period

Session 1 (Scheduled)  
Fexinidazole

Study Number: 0504-2007

| Parameter                   | Group Number: | M a l e s        |   |   |                   | F e m a l e s |   |                   |       |  |
|-----------------------------|---------------|------------------|---|---|-------------------|---------------|---|-------------------|-------|--|
|                             |               | 1                | 2 | 3 | 4                 | 1             | 2 | 3                 | 4     |  |
| MEAN PLATELET VOLUME        | N             | 5                | 0 | 0 | 5                 | 5             | 0 | 0                 | 5     |  |
| fL                          | Mean          | 6.3              | - | - | 6.4               | 6.7           | - | -                 | 6.8   |  |
|                             | Sdev          | 0.27             | - | - | 0.11              | 0.04          | - | -                 | 0.18  |  |
| PLATELET DISTRIBUTION WIDTH | N             | 5                | 0 | 0 | 5                 | 5             | 0 | 0                 | 5     |  |
| %                           | Mean          | 55.6             | - | - | 54.2              | 51.8          | - | -                 | 52.2  |  |
|                             | Sdev          | 2.63             | - | - | 1.93              | 1.25          | - | -                 | 1.94  |  |
| PLATELET HEMATOCRIT         | N             | 5                | 0 | 0 | 5                 | 5             | 0 | 0                 | 5     |  |
| %                           | Mean          | 0.75             | - | - | 0.77              | 0.90          | - | -                 | 0.96  |  |
|                             | Sdev          | 0.115            | - | - | 0.061             | 0.054         | - | -                 | 0.097 |  |
| WHITE BLOOD CELLS           | N             | 5                | 0 | 0 | 5                 | 5             | 0 | 0                 | 5     |  |
| 10 <sup>3</sup> /mcL        | Mean          | 10.50            | - | - | 10.59             | 10.61         | - | -                 | 13.42 |  |
|                             | Sdev          | 1.292            | - | - | 1.235             | 1.907         | - | -                 | 2.374 |  |
| NEUTROPHILS ABS             | N             | 5                | 0 | 0 | 5                 | 5             | 0 | 0                 | 5     |  |
| 10 <sup>3</sup> /mcL        | Mean          | 1.81             | - | - | 1.89              | 1.49          | - | -                 | 1.65  |  |
|                             | Sdev          | 0.421            | - | - | 0.308             | 0.390         | - | -                 | 0.507 |  |
| LYMPHOCYTES ABS             | N             | 5                | 0 | 0 | 5                 | 5             | 0 | 0                 | 5     |  |
| 10 <sup>3</sup> /mcL        | Mean          | 8.13             | - | - | 8.09              | 8.57          | - | -                 | 11.00 |  |
|                             | Sdev          | 1.038            | - | - | 1.077             | 1.895         | - | -                 | 1.925 |  |
| MONOCYTES ABS               | N             | 5                | 0 | 0 | 5                 | 5             | 0 | 0                 | 5     |  |
| 10 <sup>3</sup> /mcL        | Mean          | 0.32             | - | - | 0.34              | 0.24          | - | -                 | 0.40* |  |
|                             | Sdev          | 0.141            | - | - | 0.107             | 0.070         | - | -                 | 0.066 |  |
| Group 1:vehicle             |               | Group 2:50 mg/kg |   |   | Group 3:200 mg/kg |               |   | Group 4:800 mg/kg |       |  |

Group means without footnotes were not statistically different from the control at p=0.05 or p=0.01.

\* The group mean was significantly different from the control at p=0.01 with Dunnett's test of significance

CONFIDENTIAL

Table 5  
Day 43 Hematology Data  
Test period

Session 1 (Scheduled)  
Fexinidazole

Study Number: 0504-2007

| Parameter                                         | Group Number: | M a l e s        |   |   |                   | F e m a l e s |   |                   |       |  |
|---------------------------------------------------|---------------|------------------|---|---|-------------------|---------------|---|-------------------|-------|--|
|                                                   |               | 1                | 2 | 3 | 4                 | 1             | 2 | 3                 | 4     |  |
| EOSINOPHILS ABS<br>10 <sup>3</sup> /mcL           | N             | 5                | 0 | 0 | 5                 | 5             | 0 | 0                 | 5     |  |
|                                                   | Mean          | 0.14             | - | - | 0.14              | 0.13          | - | -                 | 0.11  |  |
|                                                   | Sdev          | 0.043            | - | - | 0.045             | 0.019         | - | -                 | 0.050 |  |
| BASOPHILS ABS<br>10 <sup>3</sup> /mcL             | N             | 5                | 0 | 0 | 5                 | 5             | 0 | 0                 | 5     |  |
|                                                   | Mean          | 0.03             | - | - | 0.03              | 0.02          | - | -                 | 0.04  |  |
|                                                   | Sdev          | 0.013            | - | - | 0.009             | 0.005         | - | -                 | 0.015 |  |
| LARGE UNSTAINED CELLS ABS<br>10 <sup>3</sup> /mcL | N             | 5                | 0 | 0 | 5                 | 5             | 0 | 0                 | 5     |  |
|                                                   | Mean          | 0.08             | - | - | 0.11              | 0.16          | - | -                 | 0.23  |  |
|                                                   | Sdev          | 0.049            | - | - | 0.051             | 0.082         | - | -                 | 0.085 |  |
| NEUTROPHILS %                                     | N             | 5                | 0 | 0 | 5                 | 5             | 0 | 0                 | 5     |  |
|                                                   | Mean          | 17.3             | - | - | 17.9              | 14.4          | - | -                 | 12.1  |  |
|                                                   | Sdev          | 3.55             | - | - | 2.19              | 5.07          | - | -                 | 2.32  |  |
| LYMPHOCITES %                                     | N             | 5                | 0 | 0 | 5                 | 5             | 0 | 0                 | 5     |  |
|                                                   | Mean          | 77.5             | - | - | 76.3              | 80.3          | - | -                 | 82.0  |  |
|                                                   | Sdev          | 4.25             | - | - | 3.15              | 6.01          | - | -                 | 1.70  |  |
| MONOCYTES %                                       | N             | 5                | 0 | 0 | 5                 | 5             | 0 | 0                 | 5     |  |
|                                                   | Mean          | 3.0              | - | - | 3.3               | 2.3           | - | -                 | 3.0   |  |
|                                                   | Sdev          | 1.07             | - | - | 1.02              | 0.65          | - | -                 | 0.41  |  |
| EOSINOPHILS %                                     | N             | 5                | 0 | 0 | 5                 | 5             | 0 | 0                 | 5     |  |
|                                                   | Mean          | 1.3              | - | - | 1.3               | 1.2           | - | -                 | 0.9   |  |
|                                                   | Sdev          | 0.31             | - | - | 0.33              | 0.23          | - | -                 | 0.44  |  |
| Group 1:vehicle                                   |               | Group 2:50 mg/kg |   |   | Group 3:200 mg/kg |               |   | Group 4:800 mg/kg |       |  |

Group means without footnotes were not statistically different from the control at p=0.05 or p=0.01.



CONFIDENTIAL

Table 5  
Day 43 Hematology Data  
Test period

Session 1 (Scheduled)  
Fexinidazole

Study Number: 0504-2007

| Parameter               | Group Number: | M a l e s        |   |   |                   | F e m a l e s |                   |   |      |
|-------------------------|---------------|------------------|---|---|-------------------|---------------|-------------------|---|------|
|                         |               | 1                | 2 | 3 | 4                 | 1             | 2                 | 3 | 4    |
| BASOPHILS %             | N             | 5                | 0 | 0 | 5                 | 5             | 0                 | 0 | 5    |
|                         | Mean          | 0.3              | - | - | 0.3               | 0.2           | -                 | - | 0.3  |
|                         | Sdev          | 0.12             | - | - | 0.09              | 0.05          | -                 | - | 0.09 |
| LARGE UNSTAINED CELLS % | N             | 5                | 0 | 0 | 5                 | 5             | 0                 | 0 | 5    |
|                         | Mean          | 0.7              | - | - | 1.1               | 1.5           | -                 | - | 1.8  |
|                         | Sdev          | 0.35             | - | - | 0.48              | 0.62          | -                 | - | 0.65 |
| Group 1:vehicle         |               | Group 2:50 mg/kg |   |   | Group 3:200 mg/kg |               | Group 4:800 mg/kg |   |      |

Group means without footnotes were not statistically different from the control at p=0.05 or p=0.01.

***Table 6 Clinical Chemistry***

CONFIDENTIAL

Table 6  
Day 29 Clinical Chemistry Data  
Test period

Session 1 (Scheduled)  
Fexinidazole

Study Number: 0504-2007

| Parameter                           | Group Number:    | M a l e s         |       |       |                   | F e m a l e s |       |       |       |
|-------------------------------------|------------------|-------------------|-------|-------|-------------------|---------------|-------|-------|-------|
|                                     |                  | 1                 | 2     | 3     | 4                 | 1             | 2     | 3     | 4     |
| UREA<br>mg/dL                       | N                | 5                 | 5     | 5     | 5                 | 5             | 5     | 5     | 5     |
|                                     | Mean             | 28.               | 27.   | 30.   | 27.               | 34.           | 33.   | 31.   | 37.   |
|                                     | Sdev             | 4.6               | 2.5   | 1.1   | 2.3               | 4.0           | 3.6   | 3.0   | 4.2   |
| CREATININE<br>mg/dL                 | N                | 5                 | 5     | 5     | 5                 | 5             | 5     | 5     | 5     |
|                                     | Mean             | 0.55              | 0.56  | 0.56  | 0.58              | 0.62          | 0.65  | 0.73* | 0.79* |
|                                     | Sdev             | 0.030             | 0.040 | 0.029 | 0.047             | 0.029         | 0.041 | 0.043 | 0.046 |
| ASPARTATE AMINO TRANSFERASE<br>IU/L | N                | 5                 | 5     | 5     | 5                 | 5             | 5     | 5     | 5     |
|                                     | Mean             | 147.              | 132.  | 131.  | 124.              | 122.          | 126.  | 130.  | 114.  |
|                                     | Sdev             | 24.5              | 22.1  | 19.1  | 21.6              | 25.9          | 18.5  | 21.3  | 19.4  |
| ALANINE AMINO TRANSFERASE<br>IU/L   | N                | 5                 | 5     | 5     | 5                 | 5             | 5     | 5     | 5     |
|                                     | Mean             | 28.               | 28.   | 29.   | 25.               | 29.           | 27.   | 26.   | 23.   |
|                                     | Sdev             | 6.6               | 5.3   | 4.2   | 3.3               | 5.9           | 3.8   | 2.9   | 1.2   |
| ALKALINE PHOSPHATASE<br>IU/L        | N                | 5                 | 5     | 5     | 5                 | 5             | 5     | 5     | 5     |
|                                     | Mean             | 188.              | 144.  | 132.+ | 120.+             | 92.           | 82.   | 75.   | 61.   |
|                                     | Sdev             | 30.5              | 47.6  | 10.6  | 25.5              | 20.6          | 12.9  | 28.6  | 9.9   |
| GAMMA GLUTAMYL TRANSFERASE<br>IU/L  | N                | 5                 | 2     | 0     | 1                 | 5             | 2     | 2     | 1     |
|                                     | Mean             | 5.                | 5.    | -     | 5.                | 5.            | 5.    | 5.    | 4.    |
|                                     | Sdev             | 2.5               | 0.0   | -     | -                 | 0.5           | 0.7   | 0.0   | -     |
| TOTAL BILIRUBIN<br>mg/dL            | N                | 5                 | 5     | 5     | 5                 | 5             | 5     | 5     | 5     |
|                                     | Mean             | 0.09              | 0.06* | 0.07  | 0.07              | 0.12          | 0.11  | 0.11  | 0.11  |
|                                     | Sdev             | 0.018             | 0.011 | 0.015 | 0.008             | 0.034         | 0.010 | 0.021 | 0.009 |
| Group 1:vehicle                     | Group 2:50 mg/kg | Group 3:200 mg/kg |       |       | Group 4:800 mg/kg |               |       |       |       |

Group means without footnotes were not statistically different from the control at p=0.05 or p=0.01.

+ The group mean was significantly different from the control at p=0.05 with Dunnett's test of significance

\* The group mean was significantly different from the control at p=0.01 with Dunnett's test of significance

CONFIDENTIAL

Table 6  
Day 29 Clinical Chemistry Data  
Test period

Session 1 (Scheduled)  
Fexinidazole

Study Number: 0504-2007

| Parameter                  | Group Number: | M a l e s |       |       |       | F e m a l e s |       |       |       |
|----------------------------|---------------|-----------|-------|-------|-------|---------------|-------|-------|-------|
|                            |               | 1         | 2     | 3     | 4     | 1             | 2     | 3     | 4     |
| TOTAL PROTEIN<br>g/dL      | N             | 5         | 5     | 5     | 5     | 5             | 5     | 5     | 5     |
|                            | Mean          | 6.7       | 6.8   | 6.8   | 7.0   | 7.3           | 7.7   | 7.6   | 8.0+  |
|                            | Sdev          | 0.23      | 0.21  | 0.20  | 0.23  | 0.30          | 0.46  | 0.36  | 0.30  |
| ALBUMIN<br>g/dL            | N             | 5         | 5     | 5     | 5     | 5             | 5     | 5     | 5     |
|                            | Mean          | 3.09      | 3.10  | 3.16  | 3.17  | 3.46          | 3.63  | 3.69  | 3.78  |
|                            | Sdev          | 0.129     | 0.103 | 0.032 | 0.134 | 0.187         | 0.309 | 0.249 | 0.148 |
| GLOBULIN<br>g/dL           | N             | 5         | 5     | 5     | 5     | 5             | 5     | 5     | 5     |
|                            | Mean          | 3.6       | 3.7   | 3.7   | 3.8   | 3.8           | 4.1   | 3.9   | 4.3+  |
|                            | Sdev          | 0.11      | 0.19  | 0.21  | 0.11  | 0.17          | 0.20  | 0.33  | 0.16  |
| GLUCOSE<br>mg/dL           | N             | 5         | 5     | 5     | 5     | 5             | 5     | 5     | 5     |
|                            | Mean          | 80.       | 81.   | 84.   | 78.   | 91.           | 91.   | 95.   | 105.+ |
|                            | Sdev          | 6.5       | 6.8   | 8.2   | 3.1   | 10.4          | 4.9   | 6.1   | 8.0   |
| TRIGLYCERIDES<br>mg/dL     | N             | 5         | 5     | 5     | 5     | 5             | 5     | 5     | 5     |
|                            | Mean          | 57.       | 56.   | 43.   | 28.   | 34.           | 48.   | 52.   | 44.   |
|                            | Sdev          | 19.7      | 17.1  | 25.3  | 10.8  | 5.3           | 7.2   | 13.9  | 16.3  |
| TOTAL CHOLESTEROL<br>mg/dL | N             | 5         | 5     | 5     | 5     | 5             | 5     | 5     | 5     |
|                            | Mean          | 55.       | 54.   | 54.   | 64.   | 70.           | 88.   | 90.   | 106.+ |
|                            | Sdev          | 4.2       | 12.7  | 14.2  | 17.2  | 16.6          | 14.6  | 17.4  | 19.2  |
| CALCIUM<br>mg/dL           | N             | 5         | 5     | 5     | 5     | 5             | 5     | 5     | 5     |
|                            | Mean          | 10.2      | 10.2  | 10.0  | 10.3  | 10.6          | 10.7  | 10.7  | 11.3  |
|                            | Sdev          | 0.22      | 0.07  | 0.40  | 1.06  | 0.21          | 0.63  | 0.56  | 0.35  |

Group 1:vehicle

Group 2:50 mg/kg

Group 3:200 mg/kg

Group 4:800 mg/kg

Group means without footnotes were not statistically different from the control at p=0.05 or p=0.01.

+ The group mean was significantly different from the control at p=0.05 with Dunnett's test of significance

CONFIDENTIAL

Table 6  
Day 29 Clinical Chemistry Data  
Test period

Session 1 (Scheduled)  
Fexinidazole

Study Number: 0504-2007

| Parameter            | Group Number: | M a l e s        |        |        |                   | F e m a l e s |       |                   |        |  |
|----------------------|---------------|------------------|--------|--------|-------------------|---------------|-------|-------------------|--------|--|
|                      |               | 1                | 2      | 3      | 4                 | 1             | 2     | 3                 | 4      |  |
| PHOSPHOROUS<br>mg/dL | N             | 5                | 5      | 5      | 5                 | 5             | 5     | 5                 | 5      |  |
|                      | Mean          | 8.8              | 8.7    | 8.1+   | 11.4              | 6.7           | 6.7   | 7.3               | 6.6    |  |
|                      | Sdev          | 0.18             | 0.61   | 0.33   | 2.90              | 0.42          | 0.44  | 0.53              | 0.52   |  |
| ALBUMIN/GLOBULIN     | N             | 5                | 5      | 5      | 5                 | 5             | 5     | 5                 | 5      |  |
|                      | Mean          | 0.9              | 0.9    | 0.9    | 0.8               | 0.9           | 0.9   | 1.0               | 0.9    |  |
|                      | Sdev          | 0.02             | 0.06   | 0.05   | 0.02              | 0.05          | 0.06  | 0.11              | 0.02   |  |
| SODIUM<br>mEq/L      | N             | 5                | 5      | 5      | 5                 | 5             | 5     | 5                 | 5      |  |
|                      | Mean          | 139.6            | 141.0+ | 141.6* | 143.0*            | 139.2         | 140.8 | 142.4*            | 143.2* |  |
|                      | Sdev          | 0.55             | 0.71   | 1.14   | 0.71              | 0.84          | 2.05  | 0.55              | 1.30   |  |
| POTASSIUM<br>mEq/L   | N             | 5                | 5      | 5      | 5                 | 5             | 5     | 5                 | 5      |  |
|                      | Mean          | 4.8              | 5.0    | 4.8    | 5.1               | 4.7           | 4.8   | 4.8               | 4.9    |  |
|                      | Sdev          | 0.17             | 0.18   | 0.36   | 0.33              | 0.14          | 0.32  | 0.19              | 0.20   |  |
| CHLORIDE<br>mEq/L    | N             | 5                | 5      | 5      | 5                 | 5             | 5     | 5                 | 5      |  |
|                      | Mean          | 102.6            | 102.2  | 103.4  | 103.4             | 102.2         | 103.0 | 103.6             | 104.6* |  |
|                      | Sdev          | 0.55             | 0.84   | 0.89   | 0.55              | 0.45          | 1.22  | 1.34              | 0.89   |  |
| Group 1:vehicle      |               | Group 2:50 mg/kg |        |        | Group 3:200 mg/kg |               |       | Group 4:800 mg/kg |        |  |

Group means without footnotes were not statistically different from the control at p=0.05 or p=0.01.

+ The group mean was significantly different from the control at p=0.05 with Dunnett's test of significance

\* The group mean was significantly different from the control at p=0.01 with Dunnett's test of significance

CONFIDENTIAL

Table 6  
Day 43 Clinical Chemistry Data  
Test period

Session 1 (Scheduled)  
Fexinidazole

Study Number: 0504-2007

| Parameter                           | Group Number: | M a l e s |   |   |       | F e m a l e s |   |   |       |
|-------------------------------------|---------------|-----------|---|---|-------|---------------|---|---|-------|
|                                     |               | 1         | 2 | 3 | 4     | 1             | 2 | 3 | 4     |
| UREA<br>mg/dL                       | N             | 5         | 0 | 0 | 5     | 5             | 0 | 0 | 5     |
|                                     | Mean          | 30.       | - | - | 32.   | 37.           | - | - | 39.   |
|                                     | Sdev          | 2.5       | - | - | 2.3   | 3.6           | - | - | 6.5   |
| CREATININE<br>mg/dL                 | N             | 5         | 0 | 0 | 5     | 5             | 0 | 0 | 5     |
|                                     | Mean          | 0.68      | - | - | 0.67  | 0.66          | - | - | 0.70  |
|                                     | Sdev          | 0.018     | - | - | 0.031 | 0.045         | - | - | 0.045 |
| ASPARTATE AMINO TRANSFERASE<br>IU/L | N             | 5         | 0 | 0 | 5     | 5             | 0 | 0 | 5     |
|                                     | Mean          | 149.      | - | - | 136.  | 136.          | - | - | 142.  |
|                                     | Sdev          | 20.1      | - | - | 23.8  | 27.1          | - | - | 23.7  |
| ALANINE AMINO TRANSFERASE<br>IU/L   | N             | 5         | 0 | 0 | 5     | 5             | 0 | 0 | 5     |
|                                     | Mean          | 33.       | - | - | 32.   | 32.           | - | - | 28.   |
|                                     | Sdev          | 4.1       | - | - | 4.6   | 7.2           | - | - | 2.9   |
| ALKALINE PHOSPHATASE<br>IU/L        | N             | 5         | 0 | 0 | 5     | 5             | 0 | 0 | 5     |
|                                     | Mean          | 145.      | - | - | 118.  | 87.           | - | - | 61.+  |
|                                     | Sdev          | 21.9      | - | - | 17.2  | 15.6          | - | - | 12.5  |
| GAMMA GLUTAMYL TRANSFERASE<br>IU/L  | N             | 3         | 0 | 0 | 0     | 2             | 0 | 0 | 1     |
|                                     | Mean          | 6.        | - | - | -     | 5.            | - | - | 7.    |
|                                     | Sdev          | 1.5       | - | - | -     | 1.4           | - | - | -     |
| TOTAL BILIRUBIN<br>mg/dL            | N             | 5         | 0 | 0 | 4     | 5             | 0 | 0 | 5     |
|                                     | Mean          | 0.08      | - | - | 0.09  | 0.09          | - | - | 0.10  |
|                                     | Sdev          | 0.015     | - | - | 0.014 | 0.013         | - | - | 0.020 |

Group 1:vehicle

Group 2:50 mg/kg

Group 3:200 mg/kg

Group 4:800 mg/kg

Group means without footnotes were not statistically different from the control at p=0.05 or p=0.01.

+ The group mean was significantly different from the control at p=0.05 with Dunnett's test of significance

CONFIDENTIAL

Table 6  
Day 43 Clinical Chemistry Data  
Test period

Session 1 (Scheduled)  
Fexinidazole

Study Number: 0504-2007

| Parameter                  | Group Number: | M a l e s |   |   |       | F e m a l e s |   |   |       |
|----------------------------|---------------|-----------|---|---|-------|---------------|---|---|-------|
|                            |               | 1         | 2 | 3 | 4     | 1             | 2 | 3 | 4     |
| TOTAL PROTEIN<br>g/dL      | N             | 5         | 0 | 0 | 5     | 5             | 0 | 0 | 5     |
|                            | Mean          | 6.9       | - | - | 7.0   | 7.5           | - | - | 7.7   |
|                            | Sdev          | 0.24      | - | - | 0.19  | 0.25          | - | - | 0.23  |
| ALBUMIN<br>g/dL            | N             | 5         | 0 | 0 | 5     | 5             | 0 | 0 | 5     |
|                            | Mean          | 3.07      | - | - | 3.11  | 3.56          | - | - | 3.67  |
|                            | Sdev          | 0.059     | - | - | 0.035 | 0.187         | - | - | 0.224 |
| GLOBULIN<br>g/dL           | N             | 5         | 0 | 0 | 5     | 5             | 0 | 0 | 5     |
|                            | Mean          | 3.9       | - | - | 3.9   | 3.9           | - | - | 4.0   |
|                            | Sdev          | 0.21      | - | - | 0.19  | 0.15          | - | - | 0.12  |
| GLUCOSE<br>mg/dL           | N             | 5         | 0 | 0 | 5     | 5             | 0 | 0 | 5     |
|                            | Mean          | 91.       | - | - | 83.+  | 105.          | - | - | 104.  |
|                            | Sdev          | 5.0       | - | - | 4.5   | 7.9           | - | - | 6.8   |
| TRIGLYCERIDES<br>mg/dL     | N             | 5         | 0 | 0 | 5     | 5             | 0 | 0 | 5     |
|                            | Mean          | 53.       | - | - | 60.   | 39.           | - | - | 42.   |
|                            | Sdev          | 16.3      | - | - | 18.0  | 8.9           | - | - | 4.3   |
| TOTAL CHOLESTEROL<br>mg/dL | N             | 5         | 0 | 0 | 5     | 5             | 0 | 0 | 5     |
|                            | Mean          | 51.       | - | - | 60.   | 72.           | - | - | 87.   |
|                            | Sdev          | 5.8       | - | - | 13.8  | 14.3          | - | - | 12.3  |
| CALCIUM<br>mg/dL           | N             | 5         | 0 | 0 | 5     | 5             | 0 | 0 | 5     |
|                            | Mean          | 10.3      | - | - | 10.4  | 10.7          | - | - | 11.1  |
|                            | Sdev          | 0.15      | - | - | 0.24  | 0.15          | - | - | 0.36  |

Group 1:vehicle

Group 2:50 mg/kg

Group 3:200 mg/kg

Group 4:800 mg/kg

Group means without footnotes were not statistically different from the control at p=0.05 or p=0.01.

+ The group mean was significantly different from the control at p=0.05 with Dunnett's test of significance

CONFIDENTIAL

Table 6  
Day 43 Clinical Chemistry Data  
Test period

Session 1 (Scheduled)  
Fexinidazole

Study Number: 0504-2007

| Parameter            | Group Number: | M a l e s        |   |   |                   | F e m a l e s |   |                   |       |  |
|----------------------|---------------|------------------|---|---|-------------------|---------------|---|-------------------|-------|--|
|                      |               | 1                | 2 | 3 | 4                 | 1             | 2 | 3                 | 4     |  |
| PHOSPHOROUS<br>mg/dL | N             | 5                | 0 | 0 | 5                 | 5             | 0 | 0                 | 5     |  |
|                      | Mean          | 8.1              | - | - | 8.5               | 6.5           | - | -                 | 6.6   |  |
|                      | Sdev          | 0.49             | - | - | 0.85              | 0.47          | - | -                 | 0.58  |  |
| ALBUMIN/GLOBULIN     | N             | 5                | 0 | 0 | 5                 | 5             | 0 | 0                 | 5     |  |
|                      | Mean          | 0.8              | - | - | 0.8               | 0.9           | - | -                 | 0.9   |  |
|                      | Sdev          | 0.04             | - | - | 0.04              | 0.05          | - | -                 | 0.07  |  |
| SODIUM<br>mEq/L      | N             | 5                | 0 | 0 | 5                 | 5             | 0 | 0                 | 5     |  |
|                      | Mean          | 139.0            | - | - | 140.8*            | 143.0         | - | -                 | 143.2 |  |
|                      | Sdev          | 0.71             | - | - | 0.84              | 1.00          | - | -                 | 1.64  |  |
| POTASSIUM<br>mEq/L   | N             | 5                | 0 | 0 | 5                 | 5             | 0 | 0                 | 5     |  |
|                      | Mean          | 5.0              | - | - | 5.0               | 4.8           | - | -                 | 4.9   |  |
|                      | Sdev          | 0.31             | - | - | 0.10              | 0.24          | - | -                 | 0.24  |  |
| CHLORIDE<br>mEq/L    | N             | 5                | 0 | 0 | 5                 | 5             | 0 | 0                 | 5     |  |
|                      | Mean          | 101.8            | - | - | 102.6             | 104.4         | - | -                 | 104.6 |  |
|                      | Sdev          | 0.84             | - | - | 0.89              | 0.89          | - | -                 | 0.89  |  |
| Group 1:vehicle      |               | Group 2:50 mg/kg |   |   | Group 3:200 mg/kg |               |   | Group 4:800 mg/kg |       |  |

Group means without footnotes were not statistically different from the control at p=0.05 or p=0.01.

\* The group mean was significantly different from the control at p=0.01 with Dunnett's test of significance



***Table 7 Urine Analysis - Quantitative***

CONFIDENTIAL

Table 7  
Day 29 Urine Data  
Test period

Session 1 (Scheduled)  
Fexinidazole

Study Number: 0504-2007

| Parameter            | Group Number: | M a l e s        |        |        |                   | F e m a l e s |                   |        |        |
|----------------------|---------------|------------------|--------|--------|-------------------|---------------|-------------------|--------|--------|
|                      |               | 1                | 2      | 3      | 4                 | 1             | 2                 | 3      | 4      |
| PH<br>UNITS          | N             | 5                | 5      | 5      | 5                 | 5             | 5                 | 5      | 5      |
|                      | Mean          | 7.0              | 7.0    | 7.0    | 7.0               | 6.9           | 7.0               | 7.0    | 7.0    |
|                      | Sdev          | 0.00             | 0.00   | 0.00   | 0.00              | 0.22          | 0.00              | 0.00   | 0.00   |
| SPECIFIC GRAVITY     | N             | 5                | 5      | 5      | 5                 | 5             | 5                 | 5      | 5      |
|                      | Mean          | 1.020            | 1.020  | 1.020  | 1.021             | 1.020         | 1.019             | 1.021  | 1.017  |
|                      | Sdev          | 0.0036           | 0.0020 | 0.0011 | 0.0013            | 0.0036        | 0.0030            | 0.0011 | 0.0015 |
| URINARY VOLUME<br>mL | N             | 5                | 5      | 5      | 5                 | 5             | 5                 | 5      | 5      |
|                      | Mean          | 10.6             | 12.4   | 12.2   | 11.4              | 8.6           | 8.0               | 7.6    | 9.2    |
|                      | Sdev          | 1.67             | 1.14   | 2.95   | 2.19              | 1.95          | 1.41              | 1.52   | 2.17   |
| Group 1:vehicle      |               | Group 2:50 mg/kg |        |        | Group 3:200 mg/kg |               | Group 4:800 mg/kg |        |        |

Group means without footnotes were not statistically different from the control at p=0.05 or p=0.01.

CONFIDENTIAL

Table 7  
Day 43 Urine Data  
Test period

Session 1 (Scheduled)  
Fexinidazole

Study Number: 0504-2007

| Parameter            | Group Number: | M a l e s        |   |   |                   | F e m a l e s |                   |   |        |
|----------------------|---------------|------------------|---|---|-------------------|---------------|-------------------|---|--------|
|                      |               | 1                | 2 | 3 | 4                 | 1             | 2                 | 3 | 4      |
| PH<br>UNITS          | N             | 5                | 0 | 0 | 5                 | 5             | 0                 | 0 | 5      |
|                      | Mean          | 7.0              | - | - | 7.0               | 7.0           | -                 | - | 7.0    |
|                      | Sdev          | 0.00             | - | - | 0.00              | 0.00          | -                 | - | 0.00   |
| SPECIFIC GRAVITY     | N             | 5                | 0 | 0 | 5                 | 5             | 0                 | 0 | 5      |
|                      | Mean          | 1.019            | - | - | 1.019             | 1.017         | -                 | - | 1.018  |
|                      | Sdev          | 0.0015           | - | - | 0.0023            | 0.0020        | -                 | - | 0.0021 |
| URINARY VOLUME<br>mL | N             | 5                | 0 | 0 | 5                 | 5             | 0                 | 0 | 5      |
|                      | Mean          | 11.4             | - | - | 10.2              | 9.8           | -                 | - | 6.6    |
|                      | Sdev          | 0.89             | - | - | 1.10              | 1.10          | -                 | - | 3.21   |
| Group 1:vehicle      |               | Group 2:50 mg/kg |   |   | Group 3:200 mg/kg |               | Group 4:800 mg/kg |   |        |

Group means without footnotes were not statistically different from the control at p=0.05 or p=0.01.

***Table 8 Urine Analysis - Macroscopic***

CONFIDENTIAL

Table 8  
Day 29 Urine Data  
Test period

Session 1 (Scheduled)  
Fexinidazole

Study Number: 0504-2007

| Parameter                          | Group Number: | M a l e s        |     |                   |     | F e m a l e s     |     |     |     |
|------------------------------------|---------------|------------------|-----|-------------------|-----|-------------------|-----|-----|-----|
|                                    |               | 1                | 2   | 3                 | 4   | 1                 | 2   | 3   | 4   |
| WHITE BLOOD CELLS<br>SCORE         | N             | 5                | 5   | 5                 | 5   | 5                 | 5   | 5   | 5   |
|                                    | Mean          | 0.               | 0.  | 0.                | 1.  | 0.                | 0.  | 0.  | 0.  |
|                                    | Sdev          | 0.0              | 0.4 | 0.0               | 0.4 | 0.0               | 0.0 | 0.0 | 0.0 |
| NITRITES<br>SCORE                  | N             | 5                | 5   | 5                 | 5   | 5                 | 5   | 5   | 5   |
|                                    | Mean          | 0.               | 0.  | 0.                | 1.  | 0.                | 0.  | 0.  | 0.  |
|                                    | Sdev          | 0.0              | 0.4 | 0.4               | 0.5 | 0.0               | 0.0 | 0.0 | 0.5 |
| PROTEINS<br>SCORE                  | N             | 5                | 5   | 5                 | 5   | 5                 | 5   | 5   | 5   |
|                                    | Mean          | 1.               | 1.  | 1.                | 1.  | 0.                | 0.  | 1.  | 0.  |
|                                    | Sdev          | 0.5              | 0.0 | 0.0               | 0.0 | 0.4               | 0.4 | 0.4 | 0.4 |
| GLUCOSE<br>SCORE                   | N             | 5                | 5   | 5                 | 5   | 5                 | 5   | 5   | 5   |
|                                    | Mean          | 0.               | 0.  | 0.                | 0.  | 0.                | 0.  | 0.  | 0.  |
|                                    | Sdev          | 0.0              | 0.0 | 0.0               | 0.0 | 0.0               | 0.0 | 0.0 | 0.0 |
| KETONE BODIES<br>SCORE             | N             | 5                | 5   | 5                 | 5   | 5                 | 5   | 5   | 5   |
|                                    | Mean          | 0.               | 0.  | 1.                | 1.  | 0.                | 0.  | 0.  | 0.  |
|                                    | Sdev          | 0.4              | 0.5 | 0.5               | 0.5 | 0.0               | 0.0 | 0.0 | 0.0 |
| UROBILINOGEN<br>SCORE              | N             | 5                | 5   | 5                 | 5   | 5                 | 5   | 5   | 5   |
|                                    | Mean          | 0.               | 0.  | 0.                | 0.  | 0.                | 0.  | 0.  | 0.  |
|                                    | Sdev          | 0.0              | 0.0 | 0.0               | 0.0 | 0.0               | 0.0 | 0.0 | 0.0 |
| BILIRUBIN<br>SCORE                 | N             | 5                | 5   | 5                 | 5   | 5                 | 5   | 5   | 5   |
|                                    | Mean          | 0.               | 0.  | 0.                | 0.  | 0.                | 0.  | 0.  | 0.  |
|                                    | Sdev          | 0.0              | 0.0 | 0.0               | 0.0 | 0.0               | 0.0 | 0.0 | 0.0 |
| HEMOGLOBIN/RED BLOOD CE/+<br>SCORE | N             | 5                | 5   | 5                 | 5   | 5                 | 5   | 5   | 5   |
|                                    | Mean          | 1.               | 0.  | 0.                | 0.  | 0.                | 0.  | 0.  | 0.  |
|                                    | Sdev          | 0.5              | 0.0 | 0.4               | 0.4 | 0.4               | 0.4 | 0.0 | 0.0 |
| Group 1:vehicle                    |               | Group 2:50 mg/kg |     | Group 3:200 mg/kg |     | Group 4:800 mg/kg |     |     |     |

CONFIDENTIAL

Table 8  
Day 43 Urine Data  
Test period

Session 1 (Scheduled)  
Fexinidazole

Study Number: 0504-2007

| Parameter                          | Group Number: | M a l e s        |   |   |                   | F e m a l e s |   |                   |     |  |
|------------------------------------|---------------|------------------|---|---|-------------------|---------------|---|-------------------|-----|--|
|                                    |               | 1                | 2 | 3 | 4                 | 1             | 2 | 3                 | 4   |  |
| WHITE BLOOD CELLS<br>SCORE         | N             | 5                | 0 | 0 | 5                 | 5             | 0 | 0                 | 5   |  |
|                                    | Mean          | 0.               | - | - | 0.                | 0.            | - | -                 | 0.  |  |
|                                    | Sdev          | 0.0              | - | - | 0.0               | 0.0           | - | -                 | 0.0 |  |
| NITRITES<br>SCORE                  | N             | 5                | 0 | 0 | 5                 | 5             | 0 | 0                 | 5   |  |
|                                    | Mean          | 0.               | - | - | 0.                | 0.            | - | -                 | 0.  |  |
|                                    | Sdev          | 0.0              | - | - | 0.0               | 0.0           | - | -                 | 0.0 |  |
| PROTEINS<br>SCORE                  | N             | 5                | 0 | 0 | 5                 | 5             | 0 | 0                 | 5   |  |
|                                    | Mean          | 1.               | - | - | 1.                | 0.            | - | -                 | 0.  |  |
|                                    | Sdev          | 0.4              | - | - | 0.0               | 0.0           | - | -                 | 0.0 |  |
| GLUCOSE<br>SCORE                   | N             | 5                | 0 | 0 | 5                 | 5             | 0 | 0                 | 5   |  |
|                                    | Mean          | 0.               | - | - | 0.                | 0.            | - | -                 | 0.  |  |
|                                    | Sdev          | 0.0              | - | - | 0.0               | 0.0           | - | -                 | 0.0 |  |
| KETONE BODIES<br>SCORE             | N             | 5                | 0 | 0 | 5                 | 5             | 0 | 0                 | 5   |  |
|                                    | Mean          | 0.               | - | - | 1.                | 0.            | - | -                 | 0.  |  |
|                                    | Sdev          | 0.0              | - | - | 0.5               | 0.0           | - | -                 | 0.0 |  |
| UROBILINOGEN<br>SCORE              | N             | 5                | 0 | 0 | 5                 | 5             | 0 | 0                 | 5   |  |
|                                    | Mean          | 0.               | - | - | 0.                | 0.            | - | -                 | 0.  |  |
|                                    | Sdev          | 0.0              | - | - | 0.0               | 0.0           | - | -                 | 0.0 |  |
| BILIRUBIN<br>SCORE                 | N             | 5                | 0 | 0 | 5                 | 5             | 0 | 0                 | 5   |  |
|                                    | Mean          | 0.               | - | - | 0.                | 0.            | - | -                 | 0.  |  |
|                                    | Sdev          | 0.0              | - | - | 0.0               | 0.0           | - | -                 | 0.0 |  |
| HEMOGLOBIN/RED BLOOD CE/+<br>SCORE | N             | 5                | 0 | 0 | 5                 | 5             | 0 | 0                 | 5   |  |
|                                    | Mean          | 0.               | - | - | 0.                | 0.            | - | -                 | 0.  |  |
|                                    | Sdev          | 0.4              | - | - | 0.0               | 0.0           | - | -                 | 0.5 |  |
| Group 1:vehicle                    |               | Group 2:50 mg/kg |   |   | Group 3:200 mg/kg |               |   | Group 4:800 mg/kg |     |  |

***Table 9 Absolute Organ Weights***

CONFIDENTIAL

Table 9  
 Absolute Organ Weights (g)  
 Test period  
 Days 29 Interim Sacrifice

Fexinidazole

Study Number: 0504-2007

| Group Number | Dose Level | Terminal Body Wt (g) | SPLEEN | KIDNEYS | LIVER | THYMUS | HEART |
|--------------|------------|----------------------|--------|---------|-------|--------|-------|
| M a l e s    |            |                      |        |         |       |        |       |
| 1            | vehicle    |                      |        |         |       |        |       |
|              | N          | 10                   | 10     | 10      | 10    | 10     | 10    |
|              | Mean       | 391.53               | 0.87   | 2.92    | 10.73 | 0.542  | 1.44  |
|              | Sdev       | 22.597               | 0.104  | 0.203   | 1.360 | 0.1066 | 0.159 |
| 2            | 50 mg/kg   |                      |        |         |       |        |       |
|              | N          | 10                   | 10     | 10      | 10    | 10     | 10    |
|              | Mean       | 374.45               | 0.78   | 2.75    | 11.26 | 0.575  | 1.27+ |
|              | Sdev       | 37.492               | 0.122  | 0.225   | 1.122 | 0.0868 | 0.109 |
| 3            | 200 mg/kg  |                      |        |         |       |        |       |
|              | N          | 10                   | 10     | 10      | 10    | 10     | 10    |
|              | Mean       | 356.36               | 0.78   | 2.74    | 11.01 | 0.495  | 1.23* |
|              | Sdev       | 40.429               | 0.143  | 0.274   | 1.464 | 0.1062 | 0.153 |
| 4            | 800 mg/kg  |                      |        |         |       |        |       |
|              | N          | 10                   | 10     | 10      | 10    | 10     | 10    |
|              | Mean       | 343.74               | 0.70+  | 2.57*   | 11.35 | 0.436+ | 1.16* |
|              | Sdev       | 35.627               | 0.163  | 0.283   | 1.045 | 0.0824 | 0.162 |

Note: Data collected using grace days.

+ The group mean was significantly different from the control at p=0.05.

\* The group mean was significantly different from the control at p=0.01.



CONFIDENTIAL

Table 9  
 Absolute Organ Weights (g)  
 Test period  
 Days 29 Interim Sacrifice

Fexinidazole

Study Number: 0504-2007

| Group Number | Dose Level | Terminal Body Wt (g) | BRAIN | TESTES | PROSTATE | ADRENALS |
|--------------|------------|----------------------|-------|--------|----------|----------|
| M a l e s    |            |                      |       |        |          |          |
| 1            | vehicle    |                      |       |        |          |          |
|              |            | N 10                 | 10    | 10     | 10       | 10       |
|              |            | Mean 391.53          | 2.08  | 3.49   | 0.62     | 0.062    |
|              |            | Sdev 22.597          | 0.099 | 0.188  | 0.114    | 0.0102   |
| 2            | 50 mg/kg   |                      |       |        |          |          |
|              |            | N 10                 | 10    | 10     | 10       | 10       |
|              |            | Mean 374.45          | 2.02  | 3.38   | 0.54     | 0.061    |
|              |            | Sdev 37.492          | 0.085 | 0.209  | 0.118    | 0.0083   |
| 3            | 200 mg/kg  |                      |       |        |          |          |
|              |            | N 10                 | 10    | 10     | 10       | 10       |
|              |            | Mean 356.36          | 1.98  | 3.32   | 0.55     | 0.064    |
|              |            | Sdev 40.429          | 0.074 | 0.287  | 0.120    | 0.0095   |
| 4            | 800 mg/kg  |                      |       |        |          |          |
|              |            | N 10                 | 10    | 10     | 10       | 10       |
|              |            | Mean 343.74          | 2.04  | 3.45   | 0.58     | 0.063    |
|              |            | Sdev 35.627          | 0.133 | 0.331  | 0.107    | 0.0106   |

Note: Data collected using grace days.

CONFIDENTIAL

Table 9  
 Absolute Organ Weights (g)  
 Test period  
 Days 29 Interim Sacrifice

Fexinidazole

Study Number: 0504-2007

| Group Number  | Dose Level | Terminal Body Wt (g) | SPLEEN | KIDNEYS | LIVER | THYMUS |
|---------------|------------|----------------------|--------|---------|-------|--------|
| F e m a l e s |            |                      |        |         |       |        |
| 1             | vehicle    |                      |        |         |       |        |
|               | N          | 10                   | 10     | 10      | 10    | 10     |
|               | Mean       | 222.80               | 0.57   | 1.61    | 6.02  | 0.336  |
|               | Sdev       | 12.387               | 0.075  | 0.170   | 0.604 | 0.0615 |
| 2             | 50 mg/kg   |                      |        |         |       |        |
|               | N          | 10                   | 10     | 10      | 10    | 10     |
|               | Mean       | 227.81               | 0.68*  | 1.66    | 6.65  | 0.377  |
|               | Sdev       | 11.403               | 0.104  | 0.130   | 0.715 | 0.0696 |
| 3             | 200 mg/kg  |                      |        |         |       |        |
|               | N          | 10                   | 10     | 10      | 10    | 10     |
|               | Mean       | 228.82               | 0.57   | 1.70    | 6.80  | 0.346  |
|               | Sdev       | 9.799                | 0.067  | 0.119   | 0.505 | 0.0558 |
| 4             | 800 mg/kg  |                      |        |         |       |        |
|               | N          | 9                    | 9      | 9       | 9     | 9      |
|               | Mean       | 218.81               | 0.53   | 1.69    | 8.17* | 0.317  |
|               | Sdev       | 14.739               | 0.058  | 0.175   | 1.221 | 0.0696 |

Note: Data collected using grace days.

\* The group mean was significantly different from the control at p=0.01.

CONFIDENTIAL

Table 9  
 Absolute Organ Weights (g)  
 Test period  
 Days 29 Interim Sacrifice

Fexinidazole

Study Number: 0504-2007

| Group Number  | Dose Level | Terminal Body Wt (g) | HEART | BRAIN | OVARIES | ADRENALS |
|---------------|------------|----------------------|-------|-------|---------|----------|
| F e m a l e s |            |                      |       |       |         |          |
| 1             | vehicle    |                      |       |       |         |          |
|               | N          | 10                   | 10    | 10    | 10      | 10       |
|               | Mean       | 222.80               | 0.82  | 1.91  | 0.120   | 0.074    |
|               | Sdev       | 12.387               | 0.050 | 0.111 | 0.0161  | 0.0085   |
| 2             | 50 mg/kg   |                      |       |       |         |          |
|               | N          | 10                   | 10    | 10    | 10      | 10       |
|               | Mean       | 227.81               | 0.86  | 1.92  | 0.124   | 0.074    |
|               | Sdev       | 11.403               | 0.044 | 0.084 | 0.0182  | 0.0074   |
| 3             | 200 mg/kg  |                      |       |       |         |          |
|               | N          | 10                   | 10    | 10    | 10      | 10       |
|               | Mean       | 228.82               | 0.81  | 1.87  | 0.112   | 0.071    |
|               | Sdev       | 9.799                | 0.064 | 0.077 | 0.0169  | 0.0119   |
| 4             | 800 mg/kg  |                      |       |       |         |          |
|               | N          | 9                    | 9     | 9     | 9       | 9        |
|               | Mean       | 218.81               | 0.80  | 1.87  | 0.119   | 0.069    |
|               | Sdev       | 14.739               | 0.071 | 0.059 | 0.0154  | 0.0059   |

Note: Data collected using grace days.

CONFIDENTIAL

Table 9  
 Absolute Organ Weights (g)  
 Test period  
 Days 43 Final Sacrifice

Fexinidazole

Study Number: 0504-2007

| Group Number | Dose Level | Terminal Body Wt (g) | SPLEEN | KIDNEYS | LIVER | THYMUS | HEART |
|--------------|------------|----------------------|--------|---------|-------|--------|-------|
| M a l e s    |            |                      |        |         |       |        |       |
| 1            | vehicle    |                      |        |         |       |        |       |
|              | N          | 5                    | 5      | 5       | 5     | 5      | 5     |
|              | Mean       | 406.98               | 0.63   | 2.88    | 10.44 | 0.470  | 1.40  |
|              | Sdev       | 41.035               | 0.101  | 0.387   | 1.586 | 0.0255 | 0.108 |
| 4            | 800 mg/kg  |                      |        |         |       |        |       |
|              | N          | 5                    | 5      | 5       | 5     | 5      | 5     |
|              | Mean       | 372.50               | 0.70   | 2.68    | 10.46 | 0.410  | 1.33  |
|              | Sdev       | 25.037               | 0.085  | 0.215   | 1.135 | 0.0941 | 0.081 |

Note: Data collected using grace days.

CONFIDENTIAL

Table 9  
 Absolute Organ Weights (g)  
 Test period  
 Days 43 Final Sacrifice

Fexinidazole

Study Number: 0504-2007

| Group Number | Dose Level | Terminal Body Wt (g) | BRAIN | TESTES | PROSTATE | ADRENALS |
|--------------|------------|----------------------|-------|--------|----------|----------|
| M a l e s    |            |                      |       |        |          |          |
| 1            | vehicle    |                      |       |        |          |          |
|              | N          | 5                    | 5     | 5      | 5        | 5        |
|              | Mean       | 406.98               | 2.02  | 3.40   | 0.59     | 0.057    |
|              | Sdev       | 41.035               | 0.077 | 0.264  | 0.158    | 0.0123   |
| 4            | 800 mg/kg  |                      |       |        |          |          |
|              | N          | 5                    | 5     | 5      | 5        | 5        |
|              | Mean       | 372.50               | 2.08  | 3.54   | 0.64     | 0.062    |
|              | Sdev       | 25.037               | 0.020 | 0.333  | 0.071    | 0.0078   |

Note: Data collected using grace days.

CONFIDENTIAL

Table 9  
 Absolute Organ Weights (g)  
 Test period  
 Days 43 Final Sacrifice

Fexinidazole

Study Number: 0504-2007

| Group Number  | Dose Level | Terminal Body Wt (g) | SPLEEN | KIDNEYS | LIVER | THYMUS |
|---------------|------------|----------------------|--------|---------|-------|--------|
| F e m a l e s |            |                      |        |         |       |        |
| 1             | vehicle    |                      |        |         |       |        |
|               | N          | 5                    | 5      | 5       | 5     | 5      |
|               | Mean       | 239.42               | 0.52   | 1.76    | 6.38  | 0.302  |
|               | Sdev       | 12.405               | 0.018  | 0.150   | 0.220 | 0.0626 |
| 4             | 800 mg/kg  |                      |        |         |       |        |
|               | N          | 5                    | 5      | 5       | 5     | 5      |
|               | Mean       | 224.54               | 0.52   | 1.55+   | 6.51  | 0.300  |
|               | Sdev       | 15.046               | 0.156  | 0.114   | 0.437 | 0.0693 |

Note: Data collected using grace days.

+ The group mean was significantly different from the control at p=0.05.

CONFIDENTIAL

Table 9  
 Absolute Organ Weights (g)  
 Test period  
 Days 43 Final Sacrifice

Fexinidazole

Study Number: 0504-2007

| Group Number  | Dose Level | Terminal Body Wt (g) | HEART | BRAIN | OVARIES | ADRENALS |
|---------------|------------|----------------------|-------|-------|---------|----------|
| F e m a l e s |            |                      |       |       |         |          |
| 1             | vehicle    |                      |       |       |         |          |
|               | N          | 5                    | 5     | 5     | 5       | 5        |
|               | Mean       | 239.42               | 0.89  | 1.98  | 0.103   | 0.074    |
|               | Sdev       | 12.405               | 0.044 | 0.100 | 0.0148  | 0.0075   |
| 4             | 800 mg/kg  |                      |       |       |         |          |
|               | N          | 5                    | 5     | 5     | 5       | 5        |
|               | Mean       | 224.54               | 0.84  | 1.85+ | 0.092   | 0.060*   |
|               | Sdev       | 15.046               | 0.063 | 0.063 | 0.0048  | 0.0040   |

Note: Data collected using grace days.

+ The group mean was significantly different from the control at p=0.05.

\* The group mean was significantly different from the control at p=0.01.

***Table 10 Relative Organ Weights***



CONFIDENTIAL

Table 10  
Relative Organ Weights (% Body Weight)  
Test period  
Days 29 Interim Sacrifice

Fexinidazole

Study Number: 0504-2007

| Group Number | Dose Level | Terminal Body Wt (g) | SPLEEN | KIDNEYS | LIVER | THYMUS | HEART |
|--------------|------------|----------------------|--------|---------|-------|--------|-------|
| M a l e s    |            |                      |        |         |       |        |       |
| 1            | vehicle    |                      |        |         |       |        |       |
|              | N          | 10                   | 10     | 10      | 10    | 10     | 10    |
|              | Mean       | 391.53               | 0.22   | 0.75    | 2.74  | 0.139  | 0.37  |
|              | Sdev       | 22.597               | 0.028  | 0.059   | 0.263 | 0.0304 | 0.045 |
| 2            | 50 mg/kg   |                      |        |         |       |        |       |
|              | N          | 10                   | 10     | 10      | 10    | 10     | 10    |
|              | Mean       | 374.45               | 0.21   | 0.74    | 3.01  | 0.154  | 0.34  |
|              | Sdev       | 37.492               | 0.034  | 0.065   | 0.180 | 0.0242 | 0.033 |
| 3            | 200 mg/kg  |                      |        |         |       |        |       |
|              | N          | 10                   | 10     | 10      | 10    | 10     | 10    |
|              | Mean       | 356.36               | 0.22   | 0.77    | 3.09  | 0.139  | 0.35  |
|              | Sdev       | 40.429               | 0.037  | 0.054   | 0.188 | 0.0270 | 0.023 |
| 4            | 800 mg/kg  |                      |        |         |       |        |       |
|              | N          | 10                   | 10     | 10      | 10    | 10     | 10    |
|              | Mean       | 343.74               | 0.20   | 0.75    | 3.32  | 0.127  | 0.34  |
|              | Sdev       | 35.627               | 0.042  | 0.053   | 0.336 | 0.0202 | 0.029 |

Note: Data collected using grace days.

CONFIDENTIAL

Table 10  
Relative Organ Weights (% Body Weight)  
Test period  
Days 29 Interim Sacrifice

Fexinidazole

Study Number: 0504-2007

| Group Number | Dose Level | Terminal Body Wt (g) | BRAIN | TESTES | PROSTATE | ADRENALS |
|--------------|------------|----------------------|-------|--------|----------|----------|
| M a l e s    |            |                      |       |        |          |          |
| 1            | vehicle    |                      |       |        |          |          |
|              |            | N 10                 | 10    | 10     | 10       | 10       |
|              |            | Mean 391.53          | 0.53  | 0.89   | 0.16     | 0.016    |
|              |            | Sdev 22.597          | 0.037 | 0.066  | 0.035    | 0.0022   |
| 2            | 50 mg/kg   |                      |       |        |          |          |
|              |            | N 10                 | 10    | 10     | 10       | 10       |
|              |            | Mean 374.45          | 0.54  | 0.91   | 0.14     | 0.016    |
|              |            | Sdev 37.492          | 0.044 | 0.082  | 0.027    | 0.0022   |
| 3            | 200 mg/kg  |                      |       |        |          |          |
|              |            | N 10                 | 10    | 10     | 10       | 10       |
|              |            | Mean 356.36          | 0.56  | 0.94   | 0.15     | 0.018    |
|              |            | Sdev 40.429          | 0.075 | 0.070  | 0.035    | 0.0023   |
| 4            | 800 mg/kg  |                      |       |        |          |          |
|              |            | N 10                 | 10    | 10     | 10       | 10       |
|              |            | Mean 343.74          | 0.60  | 1.01   | 0.17     | 0.019    |
|              |            | Sdev 35.627          | 0.037 | 0.113  | 0.031    | 0.0033   |

Note: Data collected using grace days.

CONFIDENTIAL

Table 10  
Relative Organ Weights (% Body Weight)  
Test period  
Days 29 Interim Sacrifice

Fexinidazole

Study Number: 0504-2007

| Group Number  | Dose Level | Terminal Body Wt (g) | SPLEEN | KIDNEYS | LIVER | THYMUS |
|---------------|------------|----------------------|--------|---------|-------|--------|
| F e m a l e s |            |                      |        |         |       |        |
| 1             | vehicle    |                      |        |         |       |        |
|               | N          | 10                   | 10     | 10      | 10    | 10     |
|               | Mean       | 222.80               | 0.26   | 0.72    | 2.70  | 0.151  |
|               | Sdev       | 12.387               | 0.035  | 0.059   | 0.168 | 0.0298 |
| 2             | 50 mg/kg   |                      |        |         |       |        |
|               | N          | 10                   | 10     | 10      | 10    | 10     |
|               | Mean       | 227.81               | 0.30   | 0.73    | 2.91  | 0.166  |
|               | Sdev       | 11.403               | 0.043  | 0.055   | 0.230 | 0.0335 |
| 3             | 200 mg/kg  |                      |        |         |       |        |
|               | N          | 10                   | 10     | 10      | 10    | 10     |
|               | Mean       | 228.82               | 0.25   | 0.74    | 2.97  | 0.152  |
|               | Sdev       | 9.799                | 0.029  | 0.033   | 0.172 | 0.0287 |
| 4             | 800 mg/kg  |                      |        |         |       |        |
|               | N          | 9                    | 9      | 9       | 9     | 9      |
|               | Mean       | 218.81               | 0.24   | 0.77    | 3.73  | 0.144  |
|               | Sdev       | 14.739               | 0.026  | 0.098   | 0.522 | 0.0249 |

Note: Data collected using grace days.

CONFIDENTIAL

Table 10  
Relative Organ Weights (% Body Weight)  
Test period  
Days 29 Interim Sacrifice

Fexinidazole

Study Number: 0504-2007

| Group Number  | Dose Level | Terminal Body Wt (g) | HEART | BRAIN | OVARIES | ADRENALS |
|---------------|------------|----------------------|-------|-------|---------|----------|
| F e m a l e s |            |                      |       |       |         |          |
| 1             | vehicle    |                      |       |       |         |          |
|               |            | N 10                 | 10    | 10    | 10      | 10       |
|               |            | Mean 222.80          | 0.37  | 0.86  | 0.054   | 0.033    |
|               |            | Sdev 12.387          | 0.019 | 0.056 | 0.0069  | 0.0036   |
| 2             | 50 mg/kg   |                      |       |       |         |          |
|               |            | N 10                 | 10    | 10    | 10      | 10       |
|               |            | Mean 227.81          | 0.38  | 0.84  | 0.055   | 0.032    |
|               |            | Sdev 11.403          | 0.024 | 0.050 | 0.0083  | 0.0030   |
| 3             | 200 mg/kg  |                      |       |       |         |          |
|               |            | N 10                 | 10    | 10    | 10      | 10       |
|               |            | Mean 228.82          | 0.35  | 0.82  | 0.049   | 0.031    |
|               |            | Sdev 9.799           | 0.028 | 0.038 | 0.0062  | 0.0047   |
| 4             | 800 mg/kg  |                      |       |       |         |          |
|               |            | N 9                  | 9     | 9     | 9       | 9        |
|               |            | Mean 218.81          | 0.36  | 0.86  | 0.055   | 0.031    |
|               |            | Sdev 14.739          | 0.024 | 0.066 | 0.0059  | 0.0012   |

Note: Data collected using grace days.

CONFIDENTIAL

Table 10  
Relative Organ Weights (% Body Weight)  
Test period  
Days 43 Final Sacrifice

Fexinidazole

Study Number: 0504-2007

| Group Number | Dose Level | Terminal Body Wt (g) | SPLEEN | KIDNEYS | LIVER | THYMUS | HEART |
|--------------|------------|----------------------|--------|---------|-------|--------|-------|
| M a l e s    |            |                      |        |         |       |        |       |
| 1            | vehicle    |                      |        |         |       |        |       |
|              | N          | 5                    | 5      | 5       | 5     | 5      | 5     |
|              | Mean       | 406.98               | 0.16   | 0.72    | 2.59  | 0.117  | 0.35  |
|              | Sdev       | 41.035               | 0.030  | 0.140   | 0.526 | 0.0168 | 0.046 |
| 4            | 800 mg/kg  |                      |        |         |       |        |       |
|              | N          | 5                    | 5      | 5       | 5     | 5      | 5     |
|              | Mean       | 372.50               | 0.19   | 0.72    | 2.81  | 0.110  | 0.36  |
|              | Sdev       | 25.037               | 0.029  | 0.016   | 0.310 | 0.0246 | 0.026 |

Note: Data collected using grace days.

CONFIDENTIAL

Table 10  
 Relative Organ Weights (% Body Weight)  
 Test period  
 Days 43 Final Sacrifice

Fexinidazole

Study Number: 0504-2007

| Group Number | Dose Level | Terminal Body Wt (g) | BRAIN | TESTES | PROSTATE | ADRENALS |
|--------------|------------|----------------------|-------|--------|----------|----------|
| M a l e s    |            |                      |       |        |          |          |
| 1            | vehicle    |                      |       |        |          |          |
|              | N          | 5                    | 5     | 5      | 5        | 5        |
|              | Mean       | 406.98               | 0.50  | 0.84   | 0.15     | 0.014    |
|              | Sdev       | 41.035               | 0.065 | 0.099  | 0.046    | 0.0040   |
| 4            | 800 mg/kg  |                      |       |        |          |          |
|              | N          | 5                    | 5     | 5      | 5        | 5        |
|              | Mean       | 372.50               | 0.56  | 0.95   | 0.17     | 0.017    |
|              | Sdev       | 25.037               | 0.042 | 0.107  | 0.023    | 0.0024   |

Note: Data collected using grace days.

CONFIDENTIAL

Table 10  
Relative Organ Weights (% Body Weight)  
Test period  
Days 43 Final Sacrifice

Fexinidazole

Study Number: 0504-2007

| Group Number  | Dose Level | Terminal Body Wt (g) | SPLEEN | KIDNEYS | LIVER | THYMUS |
|---------------|------------|----------------------|--------|---------|-------|--------|
| F e m a l e s |            |                      |        |         |       |        |
| 1             | vehicle    |                      |        |         |       |        |
|               | N          | 5                    | 5      | 5       | 5     | 5      |
|               | Mean       | 239.42               | 0.22   | 0.74    | 2.67  | 0.126  |
|               | Sdev       | 12.405               | 0.007  | 0.061   | 0.164 | 0.0261 |
| 4             | 800 mg/kg  |                      |        |         |       |        |
|               | N          | 5                    | 5      | 5       | 5     | 5      |
|               | Mean       | 224.54               | 0.23   | 0.69    | 2.90  | 0.134  |
|               | Sdev       | 15.046               | 0.054  | 0.052   | 0.120 | 0.0303 |

Note: Data collected using grace days.

CONFIDENTIAL

Table 10  
Relative Organ Weights (% Body Weight)  
Test period  
Days 43 Final Sacrifice

Fexinidazole

Study Number: 0504-2007

| Group Number  | Dose Level | Terminal Body Wt (g) | HEART | BRAIN | OVARIES | ADRENALS |
|---------------|------------|----------------------|-------|-------|---------|----------|
| F e m a l e s |            |                      |       |       |         |          |
| 1             | vehicle    |                      |       |       |         |          |
|               | N          | 5                    | 5     | 5     | 5       | 5        |
|               | Mean       | 239.42               | 0.37  | 0.83  | 0.043   | 0.031    |
|               | Sdev       | 12.405               | 0.014 | 0.067 | 0.0073  | 0.0044   |
| 4             | 800 mg/kg  |                      |       |       |         |          |
|               | N          | 5                    | 5     | 5     | 5       | 5        |
|               | Mean       | 224.54               | 0.37  | 0.83  | 0.041   | 0.027    |
|               | Sdev       | 15.046               | 0.028 | 0.070 | 0.0022  | 0.0025   |

Note: Data collected using grace days.



***Table 11 Gross Necropsy Observations***

CONFIDENTIAL

Table 11  
Incidence Summary for Gross Necropsy Observations  
Test period  
Days 29 Interim Sacrifice

Fexinidazole

Study Number: 0504-2007

| Group Number:           | M a l e s |    |    |    | F e m a l e s |    |    |   |
|-------------------------|-----------|----|----|----|---------------|----|----|---|
|                         | 1         | 2  | 3  | 4  | 1             | 2  | 3  | 4 |
| Number in Group:        | 10        | 10 | 10 | 10 | 10            | 10 | 10 | 9 |
| <hr/>                   |           |    |    |    |               |    |    |   |
| GENER. CONDITION        |           |    |    |    |               |    |    |   |
| GOOD .....              | 10        | 10 | 10 | 10 | 10            | 10 | 10 | 9 |
| PLEURAL CAVITY          |           |    |    |    |               |    |    |   |
| ABNORMAL CONTENTS ..... | 0         | 0  | 0  | 0  | 0             | 0  | 1  | 0 |
| SKIN                    |           |    |    |    |               |    |    |   |
| ALOPECIA .....          | 0         | 0  | 0  | 0  | 0             | 0  | 0  | 1 |
| ENCRUSTED AREA(S) ..... | 0         | 0  | 2  | 0  | 0             | 0  | 1  | 0 |

Note: The necropsy was conducted over multiple days.

Group 1:vehicle

Group 2:50 mg/kg

Group 3:200 mg/kg

Group 4:800 mg/kg

CONFIDENTIAL

Table 11  
 Incidence Summary for Gross Necropsy Observations  
 Test period  
 Days 43 Final Sacrifice

Fexinidazole

Study Number: 0504-2007

|                             | M a l e s |   |   |   | F e m a l e s |   |   |   |
|-----------------------------|-----------|---|---|---|---------------|---|---|---|
|                             | 1         | 2 | 3 | 4 | 1             | 2 | 3 | 4 |
| Group Number:               | 1         | 2 | 3 | 4 | 1             | 2 | 3 | 4 |
| Number in Group:            | 5         | 0 | 0 | 5 | 5             | 0 | 0 | 5 |
| <hr/>                       |           |   |   |   |               |   |   |   |
| GENER. CONDITION            |           |   |   |   |               |   |   |   |
| GOOD .....                  | 5         | 0 | 0 | 5 | 5             | 0 | 0 | 5 |
| SPLEEN                      |           |   |   |   |               |   |   |   |
| ENLARGED .....              | 0         | 0 | 0 | 0 | 0             | 0 | 0 | 1 |
| STOMACH                     |           |   |   |   |               |   |   |   |
| DARK GLANDULAR MUCOSA ..... | 0         | 0 | 0 | 0 | 1             | 0 | 0 | 0 |

Note: The necropsy was conducted over multiple days.  
 Group 1:vehicle

Group 2:50 mg/kg

Group 3:200 mg/kg

Group 4:800 mg/kg

CONFIDENTIAL

Table 11  
Incidence Summary for Gross Necropsy Observations  
Test period  
Unscheduled Sacrifices

Fexinidazole

Study Number: 0504-2007

|                         | M a l e s |   |   |   | F e m a l e s |   |   |   |
|-------------------------|-----------|---|---|---|---------------|---|---|---|
|                         | 1         | 2 | 3 | 4 | 1             | 2 | 3 | 4 |
| Group Number:           | 1         | 2 | 3 | 4 | 1             | 2 | 3 | 4 |
| Number in Group:        | 0         | 0 | 0 | 0 | 0             | 0 | 0 | 1 |
| GENER. CONDITION        |           |   |   |   |               |   |   |   |
| FAIRLY GOOD .....       | 0         | 0 | 0 | 0 | 0             | 0 | 0 | 1 |
| AUTOLYTIC CHANGES ..... | 0         | 0 | 0 | 0 | 0             | 0 | 0 | 1 |
| PLEURAL CAVITY          |           |   |   |   |               |   |   |   |
| ABNORMAL CONTENTS ..... | 0         | 0 | 0 | 0 | 0             | 0 | 0 | 1 |

Note: The necropsy was conducted over multiple days.

Group 1:vehicle

Group 2:50 mg/kg

Group 3:200 mg/kg

Group 4:800 mg/kg

***Table 12 Microscopic Observations***

CONFIDENTIAL

Table 12  
Expanded Incidence Summary for Microscopic Observations  
Test period  
Days 29 Interim Sacrifice

Fexinidazole

Study Number: 0504-2007

| CONTROLS FROM GROUP(S): 1               |           | ANIMAL SEX: M a l e s          |         |         |         | F e m a l e s |         |         |         |        |
|-----------------------------------------|-----------|--------------------------------|---------|---------|---------|---------------|---------|---------|---------|--------|
| T I S S U E S W I T H D I A G N O S E S |           | DOSAGE GROUP:<br>NO. IN GROUP: | 1<br>10 | 2<br>10 | 3<br>10 | 4<br>10       | 1<br>10 | 2<br>10 | 3<br>10 | 4<br>9 |
| ADRENALS                                | . . . . . | .NUMBER EXAMINED:              | 10      | 0       | 0       | 10            | 10      | 0       | 0       | 9      |
| CORTICAL VACUOLATION                    |           | Nad>                           | 8       | 0       | 0       | 8             | 9       | 0       | 0       | 9      |
|                                         |           | Minimal>                       | 1       | 0       | 0       | 1             | 0       | 0       | 0       | 0      |
|                                         |           | Slight>                        | 1       | 0       | 0       | 1             | 1       | 0       | 0       | 0      |
| AORTA                                   | . . . . . | .NUMBER EXAMINED:              | 10      | 0       | 0       | 10            | 10      | 0       | 0       | 9      |
| INFLAMMATION OF ADJACENT TISSUES        |           | Nad>                           | 9       | 0       | 0       | 10            | 10      | 0       | 0       | 9      |
|                                         |           | Minimal>                       | 1       | 0       | 0       | 0             | 0       | 0       | 0       | 0      |
| BONE MARROW                             | . . . . . | .NUMBER EXAMINED:              | 10      | 0       | 0       | 10            | 10      | 0       | 0       | 9      |
| SMEAR NOT SAMPLED                       |           | Nad>                           | 10      | 0       | 0       | 10            | 10      | 0       | 0       | 9      |
| BRAIN                                   | . . . . . | .NUMBER EXAMINED:              | 10      | 0       | 0       | 10            | 10      | 0       | 0       | 9      |
| CECUM                                   | . . . . . | .NUMBER EXAMINED:              | 10      | 0       | 0       | 10            | 10      | 0       | 0       | 9      |
| COLON                                   | . . . . . | .NUMBER EXAMINED:              | 10      | 0       | 0       | 10            | 10      | 0       | 0       | 9      |
| DIAPHRAGM                               | . . . . . | .NUMBER EXAMINED:              | 10      | 0       | 0       | 10            | 10      | 0       | 0       | 9      |
| MYOSITIS                                |           | Nad>                           | 10      | 0       | 0       | 10            | 10      | 0       | 0       | 9      |
| PLEURITIS                               |           | Nad>                           | 10      | 0       | 0       | 10            | 10      | 0       | 0       | 9      |
| DUODENUM                                | . . . . . | .NUMBER EXAMINED:              | 10      | 0       | 0       | 10            | 10      | 0       | 0       | 9      |
| EPIDIDYMIDES                            | . . . . . | .NUMBER EXAMINED:              | 10      | 0       | 0       | 10            | 0       | 0       | 0       | 0      |

Nad = No abnormalities detected  
Group 1:vehicle

NOS = Not otherwise specified  
Group 2:50 mg/kg

Group 3:200 mg/kg

Group 4:800 mg/kg

CONFIDENTIAL

Table 12  
Expanded Incidence Summary for Microscopic Observations  
Test period  
Days 29 Interim Sacrifice

Fexinidazole

Study Number: 0504-2007

| CONTROLS FROM GROUP(S): 1                |           | ANIMAL SEX: M a l e s |    |    |    | F e m a l e s |    |    |    |   |
|------------------------------------------|-----------|-----------------------|----|----|----|---------------|----|----|----|---|
| T I S S U E S W I T H D I A G N O S E S  |           | DOSAGE GROUP:         | 1  | 2  | 3  | 4             | 1  | 2  | 3  | 4 |
|                                          |           | NO. IN GROUP:         | 10 | 10 | 10 | 10            | 10 | 10 | 10 | 9 |
| EPIDIDYMIDES (Continued)                 | . . . . . | .NUMBER EXAMINED:     | 10 | 0  | 0  | 10            | 0  | 0  | 0  | 0 |
| LYMPHOCYTIC INFILTRATION                 |           | Nad>                  | 9  | 0  | 0  | 10            | 0  | 0  | 0  | 0 |
|                                          |           | Minimal>              | 1  | 0  | 0  | 0             | 0  | 0  | 0  | 0 |
| ESOPHAGUS                                | . . . . . | .NUMBER EXAMINED:     | 10 | 0  | 0  | 10            | 10 | 0  | 0  | 9 |
| EYES                                     | . . . . . | .NUMBER EXAMINED:     | 10 | 0  | 0  | 10            | 10 | 0  | 0  | 9 |
| FEMUR                                    | . . . . . | .NUMBER EXAMINED:     | 10 | 0  | 0  | 10            | 10 | 0  | 0  | 9 |
| HEART                                    | . . . . . | .NUMBER EXAMINED:     | 10 | 0  | 0  | 10            | 10 | 0  | 0  | 9 |
| MYOCARDIAL INFLAMMATION                  |           | Nad>                  | 7  | 0  | 0  | 8             | 9  | 0  | 0  | 8 |
|                                          |           | Minimal>              | 3  | 0  | 0  | 2             | 1  | 0  | 0  | 1 |
| PERICARDIAL INFLAMMATION                 |           | Nad>                  | 10 | 0  | 0  | 10            | 10 | 0  | 0  | 9 |
| ILEUM                                    | . . . . . | .NUMBER EXAMINED:     | 10 | 0  | 0  | 10            | 10 | 0  | 0  | 9 |
| JEJUNUM                                  | . . . . . | .NUMBER EXAMINED:     | 10 | 0  | 0  | 10            | 10 | 0  | 0  | 9 |
| KIDNEYS                                  | . . . . . | .NUMBER EXAMINED:     | 10 | 0  | 0  | 10            | 10 | 0  | 0  | 9 |
| CHRONIC INFLAMMATION                     |           | Nad>                  | 7  | 0  | 0  | 8             | 8  | 0  | 0  | 6 |
|                                          |           | Minimal>              | 3  | 0  | 0  | 2             | 2  | 0  | 0  | 3 |
| CORTICAL TUBULAR REGENERATIVE BASOPHILIA |           | Nad>                  | 7  | 0  | 0  | 7             | 10 | 0  | 0  | 8 |
|                                          |           | Minimal>              | 3  | 0  | 0  | 3             | 0  | 0  | 0  | 1 |
| MEDULLARY TUBULAR DILATATION             |           | Nad>                  | 10 | 0  | 0  | 10            | 9  | 0  | 0  | 8 |
|                                          |           | Moderate>             | 0  | 0  | 0  | 0             | 1  | 0  | 0  | 1 |

Nad = No abnormalities detected  
Group 1:vehicle

NOS = Not otherwise specified  
Group 2:50 mg/kg

Group 3:200 mg/kg

Group 4:800 mg/kg

CONFIDENTIAL

Table 12  
Expanded Incidence Summary for Microscopic Observations  
Test period  
Days 29 Interim Sacrifice

Fexinidazole

Study Number: 0504-2007

| CONTROLS FROM GROUP(S): 1               |           | ANIMAL SEX: M a l e s |    |    |    | F e m a l e s |    |    |   |
|-----------------------------------------|-----------|-----------------------|----|----|----|---------------|----|----|---|
| T I S S U E S W I T H D I A G N O S E S |           | DOSAGE GROUP: 1       | 2  | 3  | 4  | 1             | 2  | 3  | 4 |
|                                         |           | NO. IN GROUP: 10      | 10 | 10 | 10 | 10            | 10 | 10 | 9 |
| KIDNEYS (Continued)                     | . . . . . | NUMBER EXAMINED: 10   | 0  | 0  | 10 | 10            | 0  | 0  | 9 |
| PELVIC DILATATION                       |           | Nad> 10               | 0  | 0  | 9  | 10            | 0  | 0  | 9 |
|                                         |           | Slight> 0             | 0  | 0  | 1  | 0             | 0  | 0  | 0 |
| PYELITIS                                |           | Nad> 9                | 0  | 0  | 10 | 10            | 0  | 0  | 9 |
|                                         |           | Slight> 1             | 0  | 0  | 0  | 0             | 0  | 0  | 0 |
| HARDERIAN GLANDS                        | . . . . . | NUMBER EXAMINED: 10   | 10 | 10 | 10 | 10            | 10 | 10 | 9 |
| PORPHYRIN DEPOSITS                      |           | Nad> 4                | 1  | 0  | 0  | 1             | 0  | 0  | 0 |
|                                         |           | Minimal> 6            | 4  | 1  | 4  | 9             | 2  | 0  | 0 |
|                                         |           | Slight> 0             | 4  | 6  | 5  | 0             | 6  | 5  | 6 |
|                                         |           | Moderate> 0           | 1  | 3  | 1  | 0             | 2  | 5  | 3 |
| HEMORRHAGE, UNILATERAL                  |           | Nad> 10               | 9  | 8  | 10 | 10            | 6  | 6  | 9 |
|                                         |           | Slight> 0             | 1  | 2  | 0  | 0             | 4  | 4  | 0 |
| ADENITIS, UNILATERAL                    |           | Nad> 10               | 8  | 8  | 10 | 10            | 7  | 9  | 9 |
|                                         |           | Minimal> 0            | 1  | 0  | 0  | 0             | 0  | 0  | 0 |
|                                         |           | Slight> 0             | 1  | 2  | 0  | 0             | 2  | 1  | 0 |
|                                         |           | Moderate> 0           | 0  | 0  | 0  | 0             | 1  | 0  | 0 |
| LYMPHOCYTIC INFILTRATION                |           | Nad> 8                | 10 | 9  | 8  | 9             | 8  | 9  | 8 |
|                                         |           | Minimal> 2            | 0  | 1  | 2  | 1             | 2  | 1  | 1 |
| LIVER                                   | . . . . . | NUMBER EXAMINED: 10   | 10 | 10 | 10 | 10            | 10 | 10 | 9 |
| CHRONIC INFLAMMATION                    |           | Minimal> 9            | 8  | 8  | 8  | 10            | 10 | 10 | 9 |
|                                         |           | Slight> 1             | 2  | 2  | 2  | 0             | 0  | 0  | 0 |

Nad = No abnormalities detected  
Group 1: vehicle

NOS = Not otherwise specified  
Group 2: 50 mg/kg

Group 3: 200 mg/kg

Group 4: 800 mg/kg



CONFIDENTIAL

Table 12  
Expanded Incidence Summary for Microscopic Observations  
Test period  
Days 29 Interim Sacrifice

Fexinidazole

Study Number: 0504-2007

| CONTROLS FROM GROUP(S): 1                 |                           | ANIMAL SEX: M a l e s |    |    |    | F e m a l e s |    |    |   |
|-------------------------------------------|---------------------------|-----------------------|----|----|----|---------------|----|----|---|
| T I S S U E S W I T H D I A G N O S E S   |                           | DOSAGE GROUP: 1       | 2  | 3  | 4  | 1             | 2  | 3  | 4 |
|                                           |                           | NO. IN GROUP: 10      | 10 | 10 | 10 | 10            | 10 | 10 | 9 |
| LIVER (Continued)                         | . . . . .NUMBER EXAMINED: | 10                    | 10 | 10 | 10 | 10            | 10 | 10 | 9 |
| HEPATOCELLULAR HYPERTROPHY, CENTRILOBULAR |                           |                       |    |    |    |               |    |    |   |
|                                           | Nad>                      | 10                    | 0  | 0  | 0  | 10            | 3  | 0  | 0 |
|                                           | Minimal>                  | 0                     | 7  | 7  | 0  | 0             | 7  | 9  | 0 |
|                                           | Slight>                   | 0                     | 3  | 3  | 10 | 0             | 0  | 1  | 9 |
| HEPATOCELLULAR VACUOLATION, PERIportal    |                           |                       |    |    |    |               |    |    |   |
|                                           | Nad>                      | 5                     | 7  | 6  | 6  | 2             | 0  | 1  | 2 |
|                                           | Minimal>                  | 5                     | 3  | 4  | 4  | 3             | 7  | 4  | 3 |
|                                           | Slight>                   | 0                     | 0  | 0  | 0  | 5             | 3  | 5  | 4 |
| HEPATOCELLULAR VACUOLATION, DIFFUSE       |                           |                       |    |    |    |               |    |    |   |
|                                           | Nad>                      | 9                     | 8  | 10 | 9  | 10            | 10 | 10 | 9 |
|                                           | Minimal>                  | 1                     | 2  | 0  | 0  | 0             | 0  | 0  | 0 |
|                                           | Slight>                   | 0                     | 0  | 0  | 1  | 0             | 0  | 0  | 0 |
| FOCAL NECROSIS, SUBCAPSULAR               |                           |                       |    |    |    |               |    |    |   |
|                                           | Nad>                      | 10                    | 9  | 10 | 9  | 10            | 10 | 9  | 9 |
|                                           | Minimal>                  | 0                     | 1  | 0  | 1  | 0             | 0  | 1  | 0 |
| MANDIBULAR L.N. . . . .NUMBER EXAMINED:   |                           | 10                    | 0  | 0  | 10 | 10            | 0  | 0  | 9 |
| LYMPHOID DEPLETION                        |                           |                       |    |    |    |               |    |    |   |
|                                           | Nad>                      | 10                    | 0  | 0  | 10 | 10            | 0  | 0  | 9 |
| PLASMACYTOSIS                             |                           |                       |    |    |    |               |    |    |   |
|                                           | Nad>                      | 2                     | 0  | 0  | 0  | 0             | 0  | 0  | 1 |
|                                           | Slight>                   | 3                     | 0  | 0  | 4  | 3             | 0  | 0  | 1 |
|                                           | Moderate>                 | 4                     | 0  | 0  | 5  | 7             | 0  | 0  | 6 |
|                                           | Marked>                   | 1                     | 0  | 0  | 1  | 0             | 0  | 0  | 1 |
| MESENTERIC L.N. . . . .NUMBER EXAMINED:   |                           | 10                    | 0  | 0  | 10 | 10            | 0  | 0  | 9 |
| LYMPHOID DEPLETION                        |                           |                       |    |    |    |               |    |    |   |
|                                           | Nad>                      | 10                    | 0  | 0  | 10 | 10            | 0  | 0  | 9 |
| LUNG . . . . .NUMBER EXAMINED:            |                           | 10                    | 0  | 0  | 10 | 10            | 0  | 0  | 9 |

Nad = No abnormalities detected      NOS = Not otherwise specified  
Group 1:vehicle      Group 2:50 mg/kg      Group 3:200 mg/kg      Group 4:800 mg/kg

CONFIDENTIAL

Table 12  
Expanded Incidence Summary for Microscopic Observations  
Test period  
Days 29 Interim Sacrifice

Fexinidazole

Study Number: 0504-2007

| CONTROLS FROM GROUP(S): 1                   |           | ANIMAL SEX: M a l e s |    |    |    | F e m a l e s |    |    |   |
|---------------------------------------------|-----------|-----------------------|----|----|----|---------------|----|----|---|
| T I S S U E S W I T H D I A G N O S E S     |           | DOSAGE GROUP: 1       | 2  | 3  | 4  | 1             | 2  | 3  | 4 |
|                                             |           | NO. IN GROUP: 10      | 10 | 10 | 10 | 10            | 10 | 10 | 9 |
| LUNG (Continued)                            | . . . . . | NUMBER EXAMINED: 10   | 0  | 0  | 10 | 10            | 0  | 0  | 9 |
| ALVEOLAR HEMORRHAGE                         |           | Nad> 9                | 0  | 0  | 8  | 9             | 0  | 0  | 9 |
|                                             |           | Minimal> 1            | 0  | 0  | 0  | 1             | 0  | 0  | 0 |
|                                             |           | Slight> 0             | 0  | 0  | 2  | 0             | 0  | 0  | 0 |
| ACUTE INFLAMMATION                          |           | Nad> 8                | 0  | 0  | 10 | 10            | 0  | 0  | 9 |
|                                             |           | Minimal> 1            | 0  | 0  | 0  | 0             | 0  | 0  | 0 |
|                                             |           | Slight> 1             | 0  | 0  | 0  | 0             | 0  | 0  | 0 |
| ALVEOLAR MACROPHAGE INFILTRATION            |           | Nad> 5                | 0  | 0  | 6  | 6             | 0  | 0  | 6 |
|                                             |           | Minimal> 4            | 0  | 0  | 4  | 4             | 0  | 0  | 3 |
|                                             |           | Slight> 1             | 0  | 0  | 0  | 0             | 0  | 0  | 0 |
| PLEURITIS                                   |           | Nad> 10               | 0  | 0  | 10 | 10            | 0  | 0  | 9 |
| MAMMARY GLAND                               | . . . . . | NUMBER EXAMINED: 10   | 0  | 0  | 10 | 10            | 0  | 0  | 9 |
| CERVICAL MAMMARY GLAND EXAMINED             |           | Nad> 10               | 0  | 0  | 9  | 9             | 0  | 0  | 9 |
|                                             |           | Present> 0            | 0  | 0  | 1  | 1             | 0  | 0  | 0 |
| NO MAMMARY TISSUE IN THE SECTION            |           | Nad> 9                | 0  | 0  | 10 | 10            | 0  | 0  | 9 |
|                                             |           | Present> 1            | 0  | 0  | 0  | 0             | 0  | 0  | 0 |
| SKELETAL MUSCLE                             | . . . . . | NUMBER EXAMINED: 10   | 0  | 0  | 10 | 10            | 0  | 0  | 9 |
| CHRONIC INFLAMMATION                        |           | Nad> 9                | 0  | 0  | 10 | 9             | 0  | 0  | 9 |
|                                             |           | Minimal> 1            | 0  | 0  | 0  | 1             | 0  | 0  | 0 |
| SCIATIC NERVE                               | . . . . . | NUMBER EXAMINED: 10   | 0  | 0  | 10 | 10            | 0  | 0  | 9 |
| OPTIC NERVES                                | . . . . . | NUMBER EXAMINED: 9    | 0  | 0  | 10 | 10            | 0  | 0  | 9 |
| ONLY ONE NERVE IS AVAILABLE FOR EXAMINATION |           | Nad> 8                | 0  | 0  | 8  | 7             | 0  | 0  | 4 |
|                                             |           | Present> 1            | 0  | 0  | 2  | 3             | 0  | 0  | 5 |

Nad = No abnormalities detected      NOS = Not otherwise specified  
Group 1:vehicle      Group 2:50 mg/kg      Group 3:200 mg/kg      Group 4:800 mg/kg

CONFIDENTIAL

Table 12  
Expanded Incidence Summary for Microscopic Observations  
Test period  
Days 29 Interim Sacrifice

Fexinidazole

Study Number: 0504-2007

| CONTROLS FROM GROUP(S): 1                      |           | ANIMAL SEX: M a l e s |    |    |    | F e m a l e s |    |    |   |   |
|------------------------------------------------|-----------|-----------------------|----|----|----|---------------|----|----|---|---|
| T I S S U E S W I T H D I A G N O S E S        |           | DOSAGE GROUP: 1       | 2  | 3  | 4  | 1             | 2  | 3  | 4 |   |
|                                                |           | NO. IN GROUP: 10      | 10 | 10 | 10 | 10            | 10 | 10 | 9 |   |
| OVARIES                                        | . . . . . | .NUMBER EXAMINED:     | 0  | 0  | 0  | 0             | 10 | 0  | 0 | 9 |
| PANCREAS                                       | . . . . . | .NUMBER EXAMINED:     | 10 | 0  | 0  | 10            | 10 | 0  | 0 | 9 |
| CHRONIC INFLAMMATION                           |           | Nad>                  | 9  | 0  | 0  | 10            | 9  | 0  | 0 | 9 |
|                                                |           | Minimal>              | 1  | 0  | 0  | 0             | 1  | 0  | 0 | 0 |
| PITUITARY                                      | . . . . . | .NUMBER EXAMINED:     | 10 | 0  | 0  | 10            | 10 | 0  | 0 | 9 |
| PROSTATE                                       | . . . . . | .NUMBER EXAMINED:     | 10 | 0  | 0  | 10            | 0  | 0  | 0 | 0 |
| LYMPHOCYTIC INFILTRATION                       |           | Nad>                  | 6  | 0  | 0  | 8             | 0  | 0  | 0 | 0 |
|                                                |           | Minimal>              | 3  | 0  | 0  | 2             | 0  | 0  | 0 | 0 |
|                                                |           | Slight>               | 1  | 0  | 0  | 0             | 0  | 0  | 0 | 0 |
| PARATHYROIDS                                   | . . . . . | .NUMBER EXAMINED:     | 10 | 0  | 0  | 10            | 10 | 0  | 0 | 9 |
| ONLY ONE PARATHYROID AVAILABLE FOR EXAMINATION |           | Nad>                  | 5  | 0  | 0  | 3             | 4  | 0  | 0 | 5 |
|                                                |           | Present>              | 5  | 0  | 0  | 7             | 6  | 0  | 0 | 4 |
| SPINAL CORD CERV.                              | . . . . . | .NUMBER EXAMINED:     | 10 | 0  | 0  | 10            | 10 | 0  | 0 | 9 |
| SPINAL CORD THOR.                              | . . . . . | .NUMBER EXAMINED:     | 10 | 0  | 0  | 10            | 10 | 0  | 0 | 9 |
| MANDIBULAR S.G.                                | . . . . . | .NUMBER EXAMINED:     | 10 | 0  | 0  | 10            | 10 | 0  | 0 | 9 |
| ACINAR HYPERTROPHY                             |           | Nad>                  | 10 | 0  | 0  | 10            | 10 | 0  | 0 | 9 |
| PAROTIDS                                       | . . . . . | .NUMBER EXAMINED:     | 10 | 0  | 0  | 10            | 10 | 0  | 0 | 9 |

Nad = No abnormalities detected  
Group 1:vehicle

NOS = Not otherwise specified  
Group 2:50 mg/kg

Group 3:200 mg/kg

Group 4:800 mg/kg

CONFIDENTIAL

Table 12  
Expanded Incidence Summary for Microscopic Observations  
Test period  
Days 29 Interim Sacrifice

Fexinidazole

Study Number: 0504-2007

| CONTROLS FROM GROUP(S): 1               |           | ANIMAL SEX: M a l e s |    |    |    | F e m a l e s |    |    |   |
|-----------------------------------------|-----------|-----------------------|----|----|----|---------------|----|----|---|
| T I S S U E S W I T H D I A G N O S E S |           | DOSAGE GROUP: 1       | 2  | 3  | 4  | 1             | 2  | 3  | 4 |
|                                         |           | NO. IN GROUP: 10      | 10 | 10 | 10 | 10            | 10 | 10 | 9 |
| PAROTIDS (Continued)                    | . . . . . | NUMBER EXAMINED: 10   | 0  | 0  | 10 | 10            | 0  | 0  | 9 |
| ACINAR HYPERTROPHY                      |           | Nad> 10               | 0  | 0  | 10 | 10            | 0  | 0  | 9 |
| STIFLE JOINT                            | . . . . . | NUMBER EXAMINED: 10   | 0  | 0  | 10 | 10            | 0  | 0  | 9 |
| SKIN                                    | . . . . . | NUMBER EXAMINED: 10   | 0  | 2  | 10 | 10            | 0  | 1  | 9 |
| SCAB FORMATION                          |           | Nad> 10               | 0  | 0  | 10 | 10            | 0  | 1  | 9 |
|                                         |           | Slight> 0             | 0  | 1  | 0  | 0             | 0  | 0  | 0 |
|                                         |           | Moderate> 0           | 0  | 1  | 0  | 0             | 0  | 0  | 0 |
| ACANTHOSIS                              |           | Nad> 10               | 0  | 0  | 10 | 10            | 0  | 1  | 9 |
|                                         |           | Slight> 0             | 0  | 2  | 0  | 0             | 0  | 0  | 0 |
| EPIDERMAL/DERMAL INFLAMMATION           |           | Nad> 10               | 0  | 0  | 10 | 10            | 0  | 1  | 9 |
|                                         |           | Slight> 0             | 0  | 2  | 0  | 0             | 0  | 0  | 0 |
| SPLEEN                                  | . . . . . | NUMBER EXAMINED: 10   | 0  | 0  | 10 | 10            | 0  | 0  | 9 |
| LYMPHOID DEPLETION                      |           | Nad> 10               | 0  | 0  | 10 | 10            | 0  | 0  | 9 |
| EXTRAMEDULLARY HEMOPOIESIS              |           | Nad> 7                | 0  | 0  | 8  | 9             | 0  | 0  | 8 |
|                                         |           | Minimal> 3            | 0  | 0  | 2  | 1             | 0  | 0  | 1 |
| INFLAMMATION OF THE CAPSULE             |           | Nad> 9                | 0  | 0  | 9  | 10            | 0  | 0  | 9 |
|                                         |           | Minimal> 1            | 0  | 0  | 1  | 0             | 0  | 0  | 0 |
| STOMACH                                 | . . . . . | NUMBER EXAMINED: 10   | 0  | 0  | 10 | 10            | 0  | 0  | 9 |
| EROSION OF GLANDULAR STOMACH            |           | Nad> 10               | 0  | 0  | 10 | 10            | 0  | 0  | 9 |
| STERNUM                                 | . . . . . | NUMBER EXAMINED: 10   | 0  | 0  | 10 | 10            | 0  | 0  | 9 |
| SEMINAL VESICLES                        | . . . . . | NUMBER EXAMINED: 10   | 0  | 0  | 10 | 0             | 0  | 0  | 0 |

Nad = No abnormalities detected      NOS = Not otherwise specified  
Group 1:vehicle      Group 2:50 mg/kg      Group 3:200 mg/kg      Group 4:800 mg/kg

CONFIDENTIAL

Table 12  
Expanded Incidence Summary for Microscopic Observations  
Test period  
Days 29 Interim Sacrifice

Fexinidazole

Study Number: 0504-2007

| CONTROLS FROM GROUP(S): 1               |           | ANIMAL SEX: M a l e s |    |    |    | F e m a l e s |    |    |   |
|-----------------------------------------|-----------|-----------------------|----|----|----|---------------|----|----|---|
| T I S S U E S W I T H D I A G N O S E S |           | DOSAGE GROUP: 1       | 2  | 3  | 4  | 1             | 2  | 3  | 4 |
|                                         |           | NO. IN GROUP: 10      | 10 | 10 | 10 | 10            | 10 | 10 | 9 |
| TESTES                                  | . . . . . | .NUMBER EXAMINED: 10  | 0  | 0  | 10 | 0             | 0  | 0  | 0 |
| THYROIDES                               | . . . . . | .NUMBER EXAMINED: 10  | 0  | 0  | 10 | 10            | 0  | 0  | 9 |
| ECTOPIC THYMUS                          |           | Nad> 9                | 0  | 0  | 10 | 9             | 0  | 0  | 9 |
|                                         |           | Present> 1            | 0  | 0  | 0  | 1             | 0  | 0  | 0 |
| LYMPHOCYTTIC INFILTRATION               |           | Nad> 8                | 0  | 0  | 10 | 10            | 0  | 0  | 7 |
|                                         |           | Minimal> 2            | 0  | 0  | 0  | 0             | 0  | 0  | 2 |
| COLLOID DEPLETION                       |           | Nad> 10               | 0  | 0  | 10 | 10            | 0  | 0  | 9 |
| THYMUS                                  | . . . . . | .NUMBER EXAMINED: 10  | 0  | 0  | 10 | 10            | 0  | 0  | 9 |
| LYMPHOID DEPLETION                      |           | Nad> 10               | 0  | 0  | 10 | 10            | 0  | 0  | 9 |
| PLEURITIS                               |           | Nad> 10               | 0  | 0  | 10 | 10            | 0  | 0  | 9 |
| TONGUE                                  | . . . . . | .NUMBER EXAMINED: 10  | 0  | 0  | 10 | 10            | 0  | 0  | 9 |
| TRACHEA                                 | . . . . . | .NUMBER EXAMINED: 10  | 0  | 0  | 10 | 10            | 0  | 0  | 9 |
| URINARY BLADDER                         | . . . . . | .NUMBER EXAMINED: 10  | 0  | 0  | 10 | 10            | 0  | 0  | 9 |
| PROTEINACEOUS PLUG                      |           | Nad> 9                | 0  | 0  | 10 | 10            | 0  | 0  | 9 |
|                                         |           | Present> 1            | 0  | 0  | 0  | 0             | 0  | 0  | 0 |
| UTERUS                                  | . . . . . | .NUMBER EXAMINED: 0   | 0  | 0  | 0  | 10            | 0  | 0  | 9 |
| VAGINA                                  | . . . . . | .NUMBER EXAMINED: 0   | 0  | 0  | 0  | 10            | 0  | 0  | 9 |

Nad = No abnormalities detected      NOS = Not otherwise specified  
 Group 1:vehicle      Group 2:50 mg/kg      Group 3:200 mg/kg      Group 4:800 mg/kg

CONFIDENTIAL

Table 12  
Expanded Incidence Summary for Microscopic Observations  
Test period  
Days 43 Final Sacrifice

Fexinidazole

Study Number: 0504-2007

| CONTROLS FROM GROUP(S): 1                 |                  | ANIMAL SEX: M a l e s |   |   |   | F e m a l e s |   |   |   |   |
|-------------------------------------------|------------------|-----------------------|---|---|---|---------------|---|---|---|---|
| T I S S U E S W I T H D I A G N O S E S   |                  | DOSAGE GROUP:         | 1 | 2 | 3 | 4             | 1 | 2 | 3 | 4 |
|                                           |                  | NO. IN GROUP:         | 5 | 0 | 0 | 5             | 5 | 0 | 0 | 5 |
| HARDERIAN GLANDS . . . . .                | NUMBER EXAMINED: | 5                     | 0 | 0 | 5 | 5             | 0 | 0 | 5 |   |
| PORPHYRIN DEPOSITS                        | Minimal>         | 4                     | 0 | 0 | 0 | 3             | 0 | 0 | 0 |   |
|                                           | Slight>          | 0                     | 0 | 0 | 2 | 2             | 0 | 0 | 3 |   |
|                                           | Moderate>        | 1                     | 0 | 0 | 3 | 0             | 0 | 0 | 2 |   |
| HEMORRHAGE, UNILATERAL                    | Nad>             | 0                     | 0 | 0 | 2 | 2             | 0 | 0 | 1 |   |
|                                           | Minimal>         | 0                     | 0 | 0 | 1 | 1             | 0 | 0 | 2 |   |
|                                           | Slight>          | 4                     | 0 | 0 | 1 | 2             | 0 | 0 | 1 |   |
|                                           | Moderate>        | 1                     | 0 | 0 | 1 | 0             | 0 | 0 | 1 |   |
| ADENITIS, UNILATERAL                      | Nad>             | 2                     | 0 | 0 | 3 | 5             | 0 | 0 | 2 |   |
|                                           | Minimal>         | 1                     | 0 | 0 | 0 | 0             | 0 | 0 | 2 |   |
|                                           | Slight>          | 2                     | 0 | 0 | 2 | 0             | 0 | 0 | 1 |   |
| LYMPHOCYTIC INFILTRATION                  | Nad>             | 3                     | 0 | 0 | 5 | 4             | 0 | 0 | 5 |   |
|                                           | Minimal>         | 2                     | 0 | 0 | 0 | 1             | 0 | 0 | 0 |   |
| LIVER . . . . .                           | NUMBER EXAMINED: | 5                     | 0 | 0 | 5 | 5             | 0 | 0 | 5 |   |
| CHRONIC INFLAMMATION                      | Minimal>         | 5                     | 0 | 0 | 5 | 5             | 0 | 0 | 5 |   |
| HEPATOCELLULAR HYPERTROPHY, CENTRILOBULAR | Nad>             | 5                     | 0 | 0 | 3 | 5             | 0 | 0 | 4 |   |
|                                           | Minimal>         | 0                     | 0 | 0 | 2 | 0             | 0 | 0 | 1 |   |
| HEPATOCELLULAR VACUOLATION, PERIportal    | Nad>             | 3                     | 0 | 0 | 4 | 2             | 0 | 0 | 3 |   |
|                                           | Minimal>         | 2                     | 0 | 0 | 1 | 2             | 0 | 0 | 2 |   |
|                                           | Slight>          | 0                     | 0 | 0 | 0 | 1             | 0 | 0 | 0 |   |
| HEPATOCELLULAR VACUOLATION, DIFFUSE       | Nad>             | 4                     | 0 | 0 | 5 | 5             | 0 | 0 | 5 |   |
|                                           | Minimal>         | 1                     | 0 | 0 | 0 | 0             | 0 | 0 | 0 |   |

Nad = No abnormalities detected  
Group 1:vehicle

NOS = Not otherwise specified  
Group 2:50 mg/kg

Group 3:200 mg/kg

Group 4:800 mg/kg

CONFIDENTIAL

Table 12  
Expanded Incidence Summary for Microscopic Observations  
Test period  
Days 43 Final Sacrifice

Fexinidazole

Study Number: 0504-2007

| CONTROLS FROM GROUP(S): 1               |           | ANIMAL SEX:      | M a l e s |   |   |   | F e m a l e s |   |   |   |
|-----------------------------------------|-----------|------------------|-----------|---|---|---|---------------|---|---|---|
| T I S S U E S W I T H D I A G N O S E S |           | DOSAGE GROUP:    | 1         | 2 | 3 | 4 | 1             | 2 | 3 | 4 |
|                                         |           | NO. IN GROUP:    | 5         | 0 | 0 | 5 | 5             | 0 | 0 | 5 |
| LIVER (Continued)                       | . . . . . | NUMBER EXAMINED: | 5         | 0 | 0 | 5 | 5             | 0 | 0 | 5 |
| FOCAL NECROSIS, SUBCAPSULAR             |           | Nad>             | 5         | 0 | 0 | 5 | 4             | 0 | 0 | 4 |
|                                         |           | Minimal>         | 0         | 0 | 0 | 0 | 1             | 0 | 0 | 1 |
| SPLEEN                                  | . . . . . | NUMBER EXAMINED: | 0         | 0 | 0 | 0 | 0             | 0 | 0 | 1 |
| LYMPHOID DEPLETION                      |           | Nad>             | 0         | 0 | 0 | 0 | 0             | 0 | 0 | 1 |
| EXTRAMEDULLARY HEMOPOIESIS              |           | Nad>             | 0         | 0 | 0 | 0 | 0             | 0 | 0 | 1 |
| INFLAMMATION OF THE CAPSULE             |           | Nad>             | 0         | 0 | 0 | 0 | 0             | 0 | 0 | 1 |
| STOMACH                                 | . . . . . | NUMBER EXAMINED: | 0         | 0 | 0 | 0 | 1             | 0 | 0 | 0 |
| EROSION OF GLANDULAR STOMACH            |           | Minimal>         | 0         | 0 | 0 | 0 | 1             | 0 | 0 | 0 |

Nad = No abnormalities detected  
Group 1: vehicle

NOS = Not otherwise specified  
Group 2: 50 mg/kg

Group 3: 200 mg/kg

Group 4: 800 mg/kg

CONFIDENTIAL

Table 12  
Expanded Incidence Summary for Microscopic Observations  
Test period  
Unscheduled Sacrifices

Fexinidazole

Study Number: 0504-2007

| CONTROLS FROM GROUP(S): 1               |           | ANIMAL SEX: M a l e s |   |   |   | F e m a l e s |   |   |   |
|-----------------------------------------|-----------|-----------------------|---|---|---|---------------|---|---|---|
| T I S S U E S W I T H D I A G N O S E S |           | DOSAGE GROUP: 1       | 2 | 3 | 4 | 1             | 2 | 3 | 4 |
|                                         |           | NO. IN GROUP: 0       | 0 | 0 | 0 | 0             | 0 | 0 | 1 |
| ADRENALS                                | . . . . . | .NUMBER EXAMINED:     | 0 | 0 | 0 | 0             | 0 | 0 | 1 |
| CORTICAL VACUOLATION                    |           | Nad>                  | 0 | 0 | 0 | 0             | 0 | 0 | 1 |
| AORTA                                   | . . . . . | .NUMBER EXAMINED:     | 0 | 0 | 0 | 0             | 0 | 0 | 1 |
| INFLAMMATION OF ADJACENT TISSUES        |           | Moderate>             | 0 | 0 | 0 | 0             | 0 | 0 | 1 |
| BONE MARROW                             | . . . . . | .NUMBER EXAMINED:     | 0 | 0 | 0 | 0             | 0 | 0 | 1 |
| SMEAR NOT SAMPLED                       |           | Present>              | 0 | 0 | 0 | 0             | 0 | 0 | 1 |
| BRAIN                                   | . . . . . | .NUMBER EXAMINED:     | 0 | 0 | 0 | 0             | 0 | 0 | 1 |
| CECUM                                   | . . . . . | .NUMBER EXAMINED:     | 0 | 0 | 0 | 0             | 0 | 0 | 1 |
| COLON                                   | . . . . . | .NUMBER EXAMINED:     | 0 | 0 | 0 | 0             | 0 | 0 | 1 |
| DIAPHRAGM                               | . . . . . | .NUMBER EXAMINED:     | 0 | 0 | 0 | 0             | 0 | 0 | 1 |
| MYOSITIS                                |           | Slight>               | 0 | 0 | 0 | 0             | 0 | 0 | 1 |
| PLEURITIS                               |           | Slight>               | 0 | 0 | 0 | 0             | 0 | 0 | 1 |
| DUODENUM                                | . . . . . | .NUMBER EXAMINED:     | 0 | 0 | 0 | 0             | 0 | 0 | 1 |
| EPIDIDYMIDES                            | . . . . . | .NUMBER EXAMINED:     | 0 | 0 | 0 | 0             | 0 | 0 | 0 |
| ESOPHAGUS                               | . . . . . | .NUMBER EXAMINED:     | 0 | 0 | 0 | 0             | 0 | 0 | 1 |
| EYES                                    | . . . . . | .NUMBER EXAMINED:     | 0 | 0 | 0 | 0             | 0 | 0 | 1 |
| FEMUR                                   | . . . . . | .NUMBER EXAMINED:     | 0 | 0 | 0 | 0             | 0 | 0 | 1 |

Nad = No abnormalities detected  
Group 1:vehicle

NOS = Not otherwise specified  
Group 2:50 mg/kg

Group 3:200 mg/kg

Group 4:800 mg/kg



CONFIDENTIAL

Table 12  
Expanded Incidence Summary for Microscopic Observations  
Test period  
Unscheduled Sacrifices

Fexinidazole

Study Number: 0504-2007

| CONTROLS FROM GROUP(S): 1                |           | ANIMAL SEX:       | M a l e s |   |   |   | F e m a l e s |   |   |   |
|------------------------------------------|-----------|-------------------|-----------|---|---|---|---------------|---|---|---|
| T I S S U E S W I T H D I A G N O S E S  |           | DOSAGE GROUP:     | 1         | 2 | 3 | 4 | 1             | 2 | 3 | 4 |
|                                          |           | NO. IN GROUP:     | 0         | 0 | 0 | 0 | 0             | 0 | 0 | 1 |
| HEART                                    | . . . . . | .NUMBER EXAMINED: | 0         | 0 | 0 | 0 | 0             | 0 | 0 | 1 |
| MYOCARDIAL INFLAMMATION                  |           | Nad>              | 0         | 0 | 0 | 0 | 0             | 0 | 0 | 1 |
| PERICARDIAL INFLAMMATION                 |           | Slight>           | 0         | 0 | 0 | 0 | 0             | 0 | 0 | 1 |
| ILEUM                                    | . . . . . | .NUMBER EXAMINED: | 0         | 0 | 0 | 0 | 0             | 0 | 0 | 1 |
| JEJUNUM                                  | . . . . . | .NUMBER EXAMINED: | 0         | 0 | 0 | 0 | 0             | 0 | 0 | 0 |
| KIDNEYS                                  | . . . . . | .NUMBER EXAMINED: | 0         | 0 | 0 | 0 | 0             | 0 | 0 | 1 |
| CHRONIC INFLAMMATION                     |           | Nad>              | 0         | 0 | 0 | 0 | 0             | 0 | 0 | 1 |
| CORTICAL TUBULAR REGENERATIVE BASOPHILIA |           | Nad>              | 0         | 0 | 0 | 0 | 0             | 0 | 0 | 1 |
| MEDULLARY TUBULAR DILATATION             |           | Nad>              | 0         | 0 | 0 | 0 | 0             | 0 | 0 | 1 |
| PELVIC DILATATION                        |           | Nad>              | 0         | 0 | 0 | 0 | 0             | 0 | 0 | 1 |
| PYELITIS                                 |           | Nad>              | 0         | 0 | 0 | 0 | 0             | 0 | 0 | 1 |
| HARDERIAN GLANDS                         | . . . . . | .NUMBER EXAMINED: | 0         | 0 | 0 | 0 | 0             | 0 | 0 | 1 |
| PORPHYRIN DEPOSITS                       |           | Marked>           | 0         | 0 | 0 | 0 | 0             | 0 | 0 | 1 |
| HEMORRHAGE, UNILATERAL                   |           | Nad>              | 0         | 0 | 0 | 0 | 0             | 0 | 0 | 1 |
| ADENITIS, UNILATERAL                     |           | Nad>              | 0         | 0 | 0 | 0 | 0             | 0 | 0 | 1 |

Nad = No abnormalities detected  
Group 1:vehicle

NOS = Not otherwise specified  
Group 2:50 mg/kg

Group 3:200 mg/kg

Group 4:800 mg/kg

CONFIDENTIAL

Table 12  
Expanded Incidence Summary for Microscopic Observations  
Test period  
Unscheduled Sacrifices

Fexinidazole

Study Number: 0504-2007

| CONTROLS FROM GROUP(S): 1                 |           | ANIMAL SEX:      | M a l e s |   |   |   | F e m a l e s |   |   |   |
|-------------------------------------------|-----------|------------------|-----------|---|---|---|---------------|---|---|---|
| T I S S U E S W I T H D I A G N O S E S   |           | DOSAGE GROUP:    | 1         | 2 | 3 | 4 | 1             | 2 | 3 | 4 |
|                                           |           | NO. IN GROUP:    | 0         | 0 | 0 | 0 | 0             | 0 | 0 | 1 |
| HARDERIAN GLANDS (Continued)              | . . . . . | NUMBER EXAMINED: | 0         | 0 | 0 | 0 | 0             | 0 | 0 | 1 |
| LYMPHOCYTIC INFILTRATION                  |           | Nad>             | 0         | 0 | 0 | 0 | 0             | 0 | 0 | 1 |
| LIVER                                     | . . . . . | NUMBER EXAMINED: | 0         | 0 | 0 | 0 | 0             | 0 | 0 | 1 |
| CHRONIC INFLAMMATION                      |           | Nad>             | 0         | 0 | 0 | 0 | 0             | 0 | 0 | 1 |
| HEPATOCELLULAR HYPERTROPHY, CENTRILOBULAR |           | Nad>             | 0         | 0 | 0 | 0 | 0             | 0 | 0 | 1 |
| HEPATOCELLULAR VACUOLATION, PERIportal    |           | Nad>             | 0         | 0 | 0 | 0 | 0             | 0 | 0 | 1 |
| HEPATOCELLULAR VACUOLATION, DIFFUSE       |           | Nad>             | 0         | 0 | 0 | 0 | 0             | 0 | 0 | 1 |
| FOCAL NECROSIS, SUBCAPSULAR               |           | Nad>             | 0         | 0 | 0 | 0 | 0             | 0 | 0 | 1 |
| MANDIBULAR L.N.                           | . . . . . | NUMBER EXAMINED: | 0         | 0 | 0 | 0 | 0             | 0 | 0 | 1 |
| LYMPHOID DEPLETION                        |           | Moderate>        | 0         | 0 | 0 | 0 | 0             | 0 | 0 | 1 |
| PLASMACYTOSIS                             |           | Nad>             | 0         | 0 | 0 | 0 | 0             | 0 | 0 | 1 |
| MESENTERIC L.N.                           | . . . . . | NUMBER EXAMINED: | 0         | 0 | 0 | 0 | 0             | 0 | 0 | 1 |
| LYMPHOID DEPLETION                        |           | Slight>          | 0         | 0 | 0 | 0 | 0             | 0 | 0 | 1 |
| LUNG                                      | . . . . . | NUMBER EXAMINED: | 0         | 0 | 0 | 0 | 0             | 0 | 0 | 1 |
| ALVEOLAR HEMORRHAGE                       |           | Nad>             | 0         | 0 | 0 | 0 | 0             | 0 | 0 | 1 |
| ACUTE INFLAMMATION                        |           | Nad>             | 0         | 0 | 0 | 0 | 0             | 0 | 0 | 1 |

Nad = No abnormalities detected  
Group 1: vehicle

NOS = Not otherwise specified  
Group 2: 50 mg/kg

Group 3: 200 mg/kg

Group 4: 800 mg/kg

CONFIDENTIAL

Table 12  
Expanded Incidence Summary for Microscopic Observations  
Test period  
Unscheduled Sacrifices

Fexinidazole

Study Number: 0504-2007

| CONTROLS FROM GROUP(S): 1                      |                   | ANIMAL SEX:   |           |   |   | F e m a l e s |   |   |  |
|------------------------------------------------|-------------------|---------------|-----------|---|---|---------------|---|---|--|
| T I S S U E S W I T H D I A G N O S E S        |                   | DOSAGE GROUP: | M a l e s |   | 1 | F e m a l e s |   | 4 |  |
|                                                |                   | NO. IN GROUP: | 2         | 3 | 2 | 3             | 4 | 1 |  |
| LUNG (Continued)                               | .NUMBER EXAMINED: | 0             | 0         | 0 | 0 | 0             | 0 | 1 |  |
| ALVEOLAR MACROPHAGE INFILTRATION               | Nad>              | 0             | 0         | 0 | 0 | 0             | 0 | 1 |  |
| PLEURITIS                                      | Moderate>         | 0             | 0         | 0 | 0 | 0             | 0 | 1 |  |
| MAMMARY GLAND                                  | .NUMBER EXAMINED: | 0             | 0         | 0 | 0 | 0             | 0 | 1 |  |
| CERVICAL MAMMARY GLAND EXAMINED                | Nad>              | 0             | 0         | 0 | 0 | 0             | 0 | 1 |  |
| NO MAMMARY TISSUE IN THE SECTION               | Nad>              | 0             | 0         | 0 | 0 | 0             | 0 | 1 |  |
| SKELETAL MUSCLE                                | .NUMBER EXAMINED: | 0             | 0         | 0 | 0 | 0             | 0 | 1 |  |
| CHRONIC INFLAMMATION                           | Nad>              | 0             | 0         | 0 | 0 | 0             | 0 | 1 |  |
| SCIATIC NERVE                                  | .NUMBER EXAMINED: | 0             | 0         | 0 | 0 | 0             | 0 | 1 |  |
| OPTIC NERVES                                   | .NUMBER EXAMINED: | 0             | 0         | 0 | 0 | 0             | 0 | 1 |  |
| ONLY ONE NERVE IS AVAILABLE FOR EXAMINATION    | Present>          | 0             | 0         | 0 | 0 | 0             | 0 | 1 |  |
| OVARIES                                        | .NUMBER EXAMINED: | 0             | 0         | 0 | 0 | 0             | 0 | 1 |  |
| PANCREAS                                       | .NUMBER EXAMINED: | 0             | 0         | 0 | 0 | 0             | 0 | 1 |  |
| CHRONIC INFLAMMATION                           | Nad>              | 0             | 0         | 0 | 0 | 0             | 0 | 1 |  |
| PITUITARY                                      | .NUMBER EXAMINED: | 0             | 0         | 0 | 0 | 0             | 0 | 1 |  |
| PROSTATE                                       | .NUMBER EXAMINED: | 0             | 0         | 0 | 0 | 0             | 0 | 0 |  |
| PARATHYROIDS                                   | .NUMBER EXAMINED: | 0             | 0         | 0 | 0 | 0             | 0 | 1 |  |
| ONLY ONE PARATHYROID AVAILABLE FOR EXAMINATION | Present>          | 0             | 0         | 0 | 0 | 0             | 0 | 1 |  |

Nad = No abnormalities detected  
Group 1:vehicle

NOS = Not otherwise specified  
Group 2:50 mg/kg

Group 3:200 mg/kg

Group 4:800 mg/kg

CONFIDENTIAL

Table 12  
Expanded Incidence Summary for Microscopic Observations  
Test period  
Unscheduled Sacrifices

Fexinidazole

Study Number: 0504-2007

| CONTROLS FROM GROUP(S): 1               |                   | ANIMAL SEX: M a l e s |   |   |   | F e m a l e s |   |   |   |
|-----------------------------------------|-------------------|-----------------------|---|---|---|---------------|---|---|---|
| T I S S U E S W I T H D I A G N O S E S |                   | DOSAGE GROUP: 1       | 2 | 3 | 4 | 1             | 2 | 3 | 4 |
|                                         |                   | NO. IN GROUP: 0       | 0 | 0 | 0 | 0             | 0 | 0 | 1 |
| SPINAL CORD CERV. . . . .               | .NUMBER EXAMINED: | 0                     | 0 | 0 | 0 | 0             | 0 | 0 | 1 |
| SPINAL CORD THOR. . . . .               | .NUMBER EXAMINED: | 0                     | 0 | 0 | 0 | 0             | 0 | 0 | 1 |
| MANDIBULAR S.G. . . . .                 | .NUMBER EXAMINED: | 0                     | 0 | 0 | 0 | 0             | 0 | 0 | 1 |
| ACINAR HYPERTROPHY                      | Slight>           | 0                     | 0 | 0 | 0 | 0             | 0 | 0 | 1 |
| PAROTIDS . . . . .                      | .NUMBER EXAMINED: | 0                     | 0 | 0 | 0 | 0             | 0 | 0 | 1 |
| ACINAR HYPERTROPHY                      | Slight>           | 0                     | 0 | 0 | 0 | 0             | 0 | 0 | 1 |
| STIFLE JOINT . . . . .                  | .NUMBER EXAMINED: | 0                     | 0 | 0 | 0 | 0             | 0 | 0 | 1 |
| SKIN . . . . .                          | .NUMBER EXAMINED: | 0                     | 0 | 0 | 0 | 0             | 0 | 0 | 1 |
| SCAB FORMATION                          | Nad>              | 0                     | 0 | 0 | 0 | 0             | 0 | 0 | 1 |
| ACANTHOSIS                              | Nad>              | 0                     | 0 | 0 | 0 | 0             | 0 | 0 | 1 |
| EPIDERMAL/DERMAL INFLAMMATION           | Nad>              | 0                     | 0 | 0 | 0 | 0             | 0 | 0 | 1 |
| SPLEEN . . . . .                        | .NUMBER EXAMINED: | 0                     | 0 | 0 | 0 | 0             | 0 | 0 | 1 |
| LYMPHOID DEPLETION                      | Moderate>         | 0                     | 0 | 0 | 0 | 0             | 0 | 0 | 1 |
| EXTRAMEDULLARY HEMOPOIESIS              | Nad>              | 0                     | 0 | 0 | 0 | 0             | 0 | 0 | 1 |
| INFLAMMATION OF THE CAPSULE             | Nad>              | 0                     | 0 | 0 | 0 | 0             | 0 | 0 | 1 |
| STOMACH . . . . .                       | .NUMBER EXAMINED: | 0                     | 0 | 0 | 0 | 0             | 0 | 0 | 1 |

Nad = No abnormalities detected  
Group 1:vehicle

NOS = Not otherwise specified  
Group 2:50 mg/kg

Group 3:200 mg/kg

Group 4:800 mg/kg

CONFIDENTIAL

Table 12  
Expanded Incidence Summary for Microscopic Observations  
Test period  
Unscheduled Sacrifices

Fexinidazole

Study Number: 0504-2007

| CONTROLS FROM GROUP(S): 1               |           | ANIMAL SEX:       | M a l e s |   |   |   | F e m a l e s |   |   |   |
|-----------------------------------------|-----------|-------------------|-----------|---|---|---|---------------|---|---|---|
| T I S S U E S W I T H D I A G N O S E S |           | DOSAGE GROUP:     | 1         | 2 | 3 | 4 | 1             | 2 | 3 | 4 |
|                                         |           | NO. IN GROUP:     | 0         | 0 | 0 | 0 | 0             | 0 | 0 | 1 |
| STOMACH (Continued)                     | . . . . . | .NUMBER EXAMINED: | 0         | 0 | 0 | 0 | 0             | 0 | 0 | 1 |
| EROSION OF GLANDULAR STOMACH            |           | Nad>              | 0         | 0 | 0 | 0 | 0             | 0 | 0 | 1 |
| STERNUM                                 | . . . . . | .NUMBER EXAMINED: | 0         | 0 | 0 | 0 | 0             | 0 | 0 | 1 |
| SEMINAL VESICLES                        | . . . . . | .NUMBER EXAMINED: | 0         | 0 | 0 | 0 | 0             | 0 | 0 | 0 |
| TESTES                                  | . . . . . | .NUMBER EXAMINED: | 0         | 0 | 0 | 0 | 0             | 0 | 0 | 0 |
| THYROIDS                                | . . . . . | .NUMBER EXAMINED: | 0         | 0 | 0 | 0 | 0             | 0 | 0 | 1 |
| ECTOPIC THYMUS                          |           | Nad>              | 0         | 0 | 0 | 0 | 0             | 0 | 0 | 1 |
| LYMPHOCYTIC INFILTRATION                |           | Nad>              | 0         | 0 | 0 | 0 | 0             | 0 | 0 | 1 |
| COLLOID DEPLETION                       |           | Moderate>         | 0         | 0 | 0 | 0 | 0             | 0 | 0 | 1 |
| THYMUS                                  | . . . . . | .NUMBER EXAMINED: | 0         | 0 | 0 | 0 | 0             | 0 | 0 | 1 |
| LYMPHOID DEPLETION                      |           | Moderate>         | 0         | 0 | 0 | 0 | 0             | 0 | 0 | 1 |
| PLEURITIS                               |           | Moderate>         | 0         | 0 | 0 | 0 | 0             | 0 | 0 | 1 |
| TONGUE                                  | . . . . . | .NUMBER EXAMINED: | 0         | 0 | 0 | 0 | 0             | 0 | 0 | 1 |
| TRACHEA                                 | . . . . . | .NUMBER EXAMINED: | 0         | 0 | 0 | 0 | 0             | 0 | 0 | 1 |
| URINARY BLADDER                         | . . . . . | .NUMBER EXAMINED: | 0         | 0 | 0 | 0 | 0             | 0 | 0 | 1 |
| PROTEINACEOUS PLUG                      |           | Nad>              | 0         | 0 | 0 | 0 | 0             | 0 | 0 | 1 |
| UTERUS                                  | . . . . . | .NUMBER EXAMINED: | 0         | 0 | 0 | 0 | 0             | 0 | 0 | 1 |
| VAGINA                                  | . . . . . | .NUMBER EXAMINED: | 0         | 0 | 0 | 0 | 0             | 0 | 0 | 1 |

Nad = No abnormalities detected      NOS = Not otherwise specified  
 Group 1:vehicle      Group 2:50 mg/kg      Group 3:200 mg/kg      Group 4:800 mg/kg

## APPENDICES

## ***Appendix 1 Clinical Signs***

CONFIDENTIAL

Appendix 1  
Individual Animal Clinical Signs

Fexinidazole

Study Number: 0504-2007

M a l e s

| Animal Number | Dose     | Clinical Signs                  | Days Present | Study Day(s) Noted |
|---------------|----------|---------------------------------|--------------|--------------------|
| 2735          | vehicle  | Normal/no visible abnormalities | 30           | Test period 1-30   |
| 2736          | vehicle  | Normal/no visible abnormalities | 30           | Test period 1-30   |
| 2737          | vehicle  | Normal/no visible abnormalities | 30           | Test period 1-30   |
| 2738          | vehicle  | Normal/no visible abnormalities | 30           | Test period 1-30   |
| 2739          | vehicle  | Normal/no visible abnormalities | 30           | Test period 1-30   |
| 2740          | vehicle  | Normal/no visible abnormalities | 29           | Test period 1-29   |
| 2741          | vehicle  | Normal/no visible abnormalities | 29           | Test period 1-29   |
| 2742          | vehicle  | Normal/no visible abnormalities | 29           | Test period 1-29   |
| 2743          | vehicle  | Normal/no visible abnormalities | 29           | Test period 1-29   |
| 2744          | vehicle  | Normal/no visible abnormalities | 29           | Test period 1-29   |
| 2745          | vehicle  | Normal/no visible abnormalities | 43           | Test period 1-43   |
| 2746          | vehicle  | Normal/no visible abnormalities | 43           | Test period 1-43   |
| 2747          | vehicle  | Normal/no visible abnormalities | 43           | Test period 1-43   |
| 2748          | vehicle  | Normal/no visible abnormalities | 43           | Test period 1-43   |
| 2749          | vehicle  | Normal/no visible abnormalities | 43           | Test period 1-43   |
| 2750          | 50 mg/kg | Normal/no visible abnormalities | 30           | Test period 1-30   |
| 2751          | 50 mg/kg | Normal/no visible abnormalities | 30           | Test period 1-30   |



## CONFIDENTIAL

Appendix 1  
Individual Animal Clinical Signs

Fexinidazole

Study Number: 0504-2007

## M a l e s

| Animal Number | Dose      | Clinical Signs                  | Days Present | Study Day(s) Noted |
|---------------|-----------|---------------------------------|--------------|--------------------|
| 2752          | 50 mg/kg  | Normal/no visible abnormalities | 30           | Test period 1-30   |
| 2753          | 50 mg/kg  | Normal/no visible abnormalities | 30           | Test period 1-30   |
| 2754          | 50 mg/kg  | Normal/no visible abnormalities | 30           | Test period 1-30   |
| 2755          | 50 mg/kg  | Normal/no visible abnormalities | 29           | Test period 1-29   |
| 2756          | 50 mg/kg  | Normal/no visible abnormalities | 29           | Test period 1-29   |
| 2757          | 50 mg/kg  | Normal/no visible abnormalities | 29           | Test period 1-29   |
| 2758          | 50 mg/kg  | Normal/no visible abnormalities | 29           | Test period 1-29   |
| 2759          | 50 mg/kg  | Normal/no visible abnormalities | 29           | Test period 1-29   |
| 2760          | 200 mg/kg | Normal/no visible abnormalities | 30           | Test period 1-30   |
| 2761          | 200 mg/kg | Normal/no visible abnormalities | 30           | Test period 1-30   |
| 2762          | 200 mg/kg | Normal/no visible abnormalities | 30           | Test period 1-30   |
| 2763          | 200 mg/kg | Normal/no visible abnormalities | 20           | Test period 1-20   |
|               |           | Focal alopecia, Neck            | 2            | Test period 29-30  |
|               |           | Scabbed area, Neck              | 7            | Test period 22-28  |
|               |           | Ulceration, Neck                | 1            | Test period 21     |
| 2764          | 200 mg/kg | Normal/no visible abnormalities | 28           | Test period 1-28   |
|               |           | Focal alopecia, Head            | 2            | Test period 29-30  |
| 2765          | 200 mg/kg | Normal/no visible abnormalities | 29           | Test period 1-29   |
| 2766          | 200 mg/kg | Normal/no visible abnormalities | 29           | Test period 1-29   |

CONFIDENTIAL

Appendix 1  
Individual Animal Clinical Signs

Fexinidazole

Study Number: 0504-2007

M a l e s

| Animal Number | Dose      | Clinical Signs                  | Days Present | Study Day(s) Noted |
|---------------|-----------|---------------------------------|--------------|--------------------|
| 2767          | 200 mg/kg | Normal/no visible abnormalities | 29           | Test period 1-29   |
| 2768          | 200 mg/kg | Normal/no visible abnormalities | 29           | Test period 1-29   |
| 2769          | 200 mg/kg | Normal/no visible abnormalities | 29           | Test period 1-29   |
| 2770          | 800 mg/kg | Normal/no visible abnormalities | 30           | Test period 1-30   |
| 2771          | 800 mg/kg | Normal/no visible abnormalities | 30           | Test period 1-30   |
| 2772          | 800 mg/kg | Normal/no visible abnormalities | 30           | Test period 1-30   |
| 2773          | 800 mg/kg | Normal/no visible abnormalities | 30           | Test period 1-30   |
| 2774          | 800 mg/kg | Normal/no visible abnormalities | 30           | Test period 1-30   |
| 2775          | 800 mg/kg | Normal/no visible abnormalities | 29           | Test period 1-29   |
| 2776          | 800 mg/kg | Normal/no visible abnormalities | 29           | Test period 1-29   |
| 2777          | 800 mg/kg | Normal/no visible abnormalities | 29           | Test period 1-29   |
| 2778          | 800 mg/kg | Normal/no visible abnormalities | 29           | Test period 1-29   |
| 2779          | 800 mg/kg | Normal/no visible abnormalities | 29           | Test period 1-29   |
| 2780          | 800 mg/kg | Normal/no visible abnormalities | 43           | Test period 1-43   |
| 2781          | 800 mg/kg | Normal/no visible abnormalities | 43           | Test period 1-43   |
| 2782          | 800 mg/kg | Normal/no visible abnormalities | 43           | Test period 1-43   |
| 2783          | 800 mg/kg | Normal/no visible abnormalities | 43           | Test period 1-43   |

CONFIDENTIAL

Appendix 1  
Individual Animal Clinical Signs

Fexinidazole

Study Number: 0504-2007

---

M a l e s

| <u>Animal<br/>Number</u> | <u>Dose</u> | <u>Clinical Signs</u>           | <u>Days<br/>Present</u> | <u>Study Day(s) Noted</u> |
|--------------------------|-------------|---------------------------------|-------------------------|---------------------------|
| 2784                     | 800 mg/kg   | Normal/no visible abnormalities | 43                      | Test period 1-43          |

---

CONFIDENTIAL

Appendix 1  
Individual Animal Clinical Signs

Fexinidazole

Study Number: 0504-2007

F e m a l e

| Animal Number | Dose     | Clinical Signs                                        | Days Present | Study Day(s) Noted                    |
|---------------|----------|-------------------------------------------------------|--------------|---------------------------------------|
| 2785          | vehicle  | Normal/no visible abnormalities                       | 30           | Test period 1-30                      |
| 2786          | vehicle  | Normal/no visible abnormalities                       | 30           | Test period 1-30                      |
| 2787          | vehicle  | Normal/no visible abnormalities                       | 30           | Test period 1-30                      |
| 2788          | vehicle  | Normal/no visible abnormalities<br>Fur thinning, Back | 21<br>9      | Test period 1-21<br>Test period 22-30 |
| 2789          | vehicle  | Normal/no visible abnormalities                       | 30           | Test period 1-30                      |
| 2790          | vehicle  | Normal/no visible abnormalities                       | 29           | Test period 1-29                      |
| 2791          | vehicle  | Normal/no visible abnormalities                       | 29           | Test period 1-29                      |
| 2792          | vehicle  | Normal/no visible abnormalities                       | 29           | Test period 1-29                      |
| 2793          | vehicle  | Normal/no visible abnormalities                       | 29           | Test period 1-29                      |
| 2794          | vehicle  | Normal/no visible abnormalities                       | 29           | Test period 1-29                      |
| 2795          | vehicle  | Normal/no visible abnormalities                       | 43           | Test period 1-43                      |
| 2796          | vehicle  | Normal/no visible abnormalities                       | 43           | Test period 1-43                      |
| 2797          | vehicle  | Normal/no visible abnormalities                       | 43           | Test period 1-43                      |
| 2798          | vehicle  | Normal/no visible abnormalities                       | 43           | Test period 1-43                      |
| 2799          | vehicle  | Normal/no visible abnormalities                       | 43           | Test period 1-43                      |
| 2800          | 50 mg/kg | Normal/no visible abnormalities                       | 20           | Test period 1-5,16-30                 |

CONFIDENTIAL

Appendix 1  
Individual Animal Clinical Signs

Fexinidazole

Study Number: 0504-2007

F e m a l e

| Animal Number | Dose      | Clinical Signs                                                  | Days Present | Study Day(s) Noted                           |
|---------------|-----------|-----------------------------------------------------------------|--------------|----------------------------------------------|
| 2800          | 50 mg/kg  | Accidental wound, Forelimb/s                                    | 10           | Test period 6-15                             |
| 2801          | 50 mg/kg  | Normal/no visible abnormalities                                 | 30           | Test period 1-30                             |
| 2802          | 50 mg/kg  | Normal/no visible abnormalities                                 | 30           | Test period 1-30                             |
| 2803          | 50 mg/kg  | Normal/no visible abnormalities                                 | 30           | Test period 1-30                             |
| 2804          | 50 mg/kg  | Normal/no visible abnormalities                                 | 30           | Test period 1-30                             |
| 2805          | 50 mg/kg  | Normal/no visible abnormalities                                 | 29           | Test period 1-29                             |
| 2806          | 50 mg/kg  | Normal/no visible abnormalities<br>Accidental wound, Forelimb/s | 26<br>3      | Test period 1-12, 16-29<br>Test period 13-15 |
| 2807          | 50 mg/kg  | Normal/no visible abnormalities                                 | 29           | Test period 1-29                             |
| 2808          | 50 mg/kg  | Normal/no visible abnormalities                                 | 29           | Test period 1-29                             |
| 2809          | 50 mg/kg  | Normal/no visible abnormalities                                 | 29           | Test period 1-29                             |
| 2810          | 200 mg/kg | Normal/no visible abnormalities                                 | 30           | Test period 1-30                             |
| 2811          | 200 mg/kg | Normal/no visible abnormalities                                 | 30           | Test period 1-30                             |
| 2812          | 200 mg/kg | Normal/no visible abnormalities                                 | 30           | Test period 1-30                             |
| 2813          | 200 mg/kg | Normal/no visible abnormalities                                 | 30           | Test period 1-30                             |
| 2814          | 200 mg/kg | Normal/no visible abnormalities<br>Scabbed area, Cheek/s        | 21<br>9      | Test period 1-21<br>Test period 22-30        |
| 2815          | 200 mg/kg | Normal/no visible abnormalities                                 | 29           | Test period 1-29                             |

CONFIDENTIAL

Appendix 1  
Individual Animal Clinical Signs

Fexinidazole

Study Number: 0504-2007

F e m a l e

| Animal Number | Dose      | Clinical Signs                                                | Days Present | Study Day(s) Noted                   |
|---------------|-----------|---------------------------------------------------------------|--------------|--------------------------------------|
| 2816          | 200 mg/kg | Normal/no visible abnormalities                               | 29           | Test period 1-29                     |
| 2817          | 200 mg/kg | Normal/no visible abnormalities                               | 29           | Test period 1-29                     |
| 2818          | 200 mg/kg | Normal/no visible abnormalities                               | 29           | Test period 1-29                     |
| 2819          | 200 mg/kg | Normal/no visible abnormalities                               | 29           | Test period 1-29                     |
| 2820          | 800 mg/kg | Normal/no visible abnormalities                               | 30           | Test period 1-30                     |
| 2821          | 800 mg/kg | Normal/no visible abnormalities                               | 30           | Test period 1-30                     |
| 2822          | 800 mg/kg | Normal/no visible abnormalities<br>Focal alopecia, Forelimb/s | 9<br>21      | Test period 1-9<br>Test period 10-30 |
| 2823          | 800 mg/kg | Normal/no visible abnormalities                               | 30           | Test period 1-30                     |
| 2824          | 800 mg/kg | Normal/no visible abnormalities                               | 13           | Test period 1-13                     |
| 2825          | 800 mg/kg | Normal/no visible abnormalities                               | 29           | Test period 1-29                     |
| 2826          | 800 mg/kg | Normal/no visible abnormalities                               | 29           | Test period 1-29                     |
| 2827          | 800 mg/kg | Normal/no visible abnormalities                               | 29           | Test period 1-29                     |
| 2828          | 800 mg/kg | Normal/no visible abnormalities                               | 29           | Test period 1-29                     |
| 2829          | 800 mg/kg | Normal/no visible abnormalities                               | 29           | Test period 1-29                     |
| 2830          | 800 mg/kg | Normal/no visible abnormalities                               | 43           | Test period 1-43                     |
| 2831          | 800 mg/kg | Normal/no visible abnormalities                               | 43           | Test period 1-43                     |

CONFIDENTIAL

Appendix 1  
Individual Animal Clinical Signs

Fexinidazole

Study Number: 0504-2007

F e m a l e

| Animal Number | Dose      | Clinical Signs                  | Days Present | Study Day(s) Noted |
|---------------|-----------|---------------------------------|--------------|--------------------|
| 2832          | 800 mg/kg | Normal/no visible abnormalities | 43           | Test period 1-43   |
| 2833          | 800 mg/kg | Normal/no visible abnormalities | 43           | Test period 1-43   |
| 2834          | 800 mg/kg | Normal/no visible abnormalities | 43           | Test period 1-43   |

## ***Appendix 2 Body Weights***



CONFIDENTIAL

Appendix 2  
Body Weights (g)

Fexinidazole

Study Number: 0504-2007

| Dose Level | Animal Number | Group/ Subgroup | Study Day | M a l e s |        |        |        |        |        |        |
|------------|---------------|-----------------|-----------|-----------|--------|--------|--------|--------|--------|--------|
|            |               |                 |           | -4 "      | 1#     | 8      | 14     | 21     | 28     | 35     |
| vehicle    |               |                 |           |           |        |        |        |        |        |        |
|            | 2735          | 1/1             | 189.50    | 237.20    | 295.80 | 330.10 | 364.30 | 409.00 | Dead   |        |
|            | 2736          | 1/1             | 193.30    | 237.10    | 303.80 | 350.50 | 390.50 | 426.90 | Dead   |        |
|            | 2737          | 1/1             | 178.50    | 232.80    | 317.30 | 368.60 | 403.20 | 444.50 | Dead   |        |
|            | 2738          | 1/1             | 185.20    | 227.90    | 291.80 | 337.90 | 371.30 | 404.60 | Dead   |        |
|            | 2739          | 1/1             | 188.00    | 238.70    | 311.00 | 356.20 | 400.20 | 440.80 | Dead   |        |
|            | 2740          | 1/1             | 183.40    | 232.60    | 300.60 | 357.90 | 402.30 | 438.90 | Dead   |        |
|            | 2741          | 1/1             | 195.00    | 241.30    | 308.20 | 345.90 | 382.90 | 408.50 | Dead   |        |
|            | 2742          | 1/1             | 183.40    | 224.70    | 277.70 | 315.10 | 347.80 | 386.60 | Dead   |        |
|            | 2743          | 1/1             | 178.90    | 227.90    | 293.50 | 334.20 | 366.40 | 406.50 | Dead   |        |
|            | 2744          | 1/1             | 185.70    | 234.00    | 304.20 | 347.90 | 393.20 | 429.50 | Dead   |        |
|            | 2745          | 1/1             | 184.80    | 226.80    | 289.10 | 337.40 | 368.80 | 395.80 | 412.10 | 440.40 |
|            | 2746          | 1/1             | 169.70    | 208.80    | 268.10 | 307.30 | 334.70 | 363.40 | 377.50 | 404.40 |
|            | 2747          | 1/1             | 172.70    | 216.00    | 282.40 | 335.50 | 380.60 | 419.70 | 434.30 | 471.60 |
|            | 2748          | 1/1             | 196.50    | 245.00    | 316.40 | 353.70 | 390.00 | 434.70 | 457.40 | 502.50 |
|            | 2749          | 1/1             | 185.20    | 226.80    | 279.30 | 317.10 | 341.00 | 362.10 | 376.10 | 399.60 |
|            |               | N               | 15        | 15        | 15     | 15     | 15     | 15     | 5      | 5      |
|            |               | Mean            | 184.65    | 230.51    | 295.95 | 339.69 | 375.81 | 411.43 | 411.48 | 443.70 |
|            |               | Sdev            | 7.555     | 9.488     | 14.740 | 17.261 | 22.066 | 26.150 | 35.483 | 43.977 |
| 50 mg/kg   |               |                 |           |           |        |        |        |        |        |        |
|            | 2750          | 2/1             | 192.20    | 243.60    | 324.00 | 379.80 | 427.80 | 443.40 | Dead   |        |
|            | 2751          | 2/1             | 175.60    | 224.80    | 286.50 | 333.30 | 370.20 | 389.70 | Dead   |        |
|            | 2752          | 2/1             | 173.10    | 219.40    | 286.70 | 343.30 | 389.90 | 423.20 | Dead   |        |
|            | 2753          | 2/1             | 185.40    | 230.80    | 294.60 | 335.30 | 358.70 | 382.40 | Dead   |        |
|            | 2754          | 2/1             | 187.70    | 233.20    | 292.00 | 323.70 | 351.00 | 370.20 | Dead   |        |
|            | 2755          | 2/1             | 172.00    | 247.60    | 330.70 | 390.30 | 430.30 | 476.70 | Dead   |        |
|            | 2756          | 2/1             | 193.30    | 211.60    | 274.20 | 320.00 | 353.30 | 381.80 | Dead   |        |
|            | 2757          | 2/1             | 174.50    | 218.40    | 275.20 | 317.30 | 337.90 | 368.50 | Dead   |        |
|            | 2758          | 2/1             | 175.00    | 212.10    | 271.90 | 316.60 | 342.30 | 364.50 | Dead   |        |
|            | 2759          | 2/1             | 175.30    | 218.60    | 284.20 | 324.70 | 352.30 | 386.80 | Dead   |        |
|            |               | N               | 10        | 10        | 10     | 10     | 10     | 10     | 0      | 0      |
|            |               | Mean            | 180.41    | 226.01    | 292.00 | 338.43 | 371.37 | 398.72 | -      | -      |
|            |               | Sdev            | 8.305     | 12.514    | 20.140 | 26.098 | 33.719 | 37.044 | -      | -      |

Note: " = Pretest phase (groups); # = Test period

CONFIDENTIAL

Appendix 2  
Body Weights (g)

Fexinidazole

Study Number: 0504-2007

| Dose Level | Animal Number | Group/Subgroup | Study Day | M a l e s |        |        |        |        |        |        |    |        |
|------------|---------------|----------------|-----------|-----------|--------|--------|--------|--------|--------|--------|----|--------|
|            |               |                |           | -4"       | 1#     | 8      | 14     | 21     | 28     | 35     | 42 |        |
| 200 mg/kg  |               |                |           |           |        |        |        |        |        |        |    |        |
|            | 2760          | 3/1            |           | 182.50    | 229.30 | 293.80 | 335.70 | 358.70 | 381.20 | Dead   |    |        |
|            | 2761          | 3/1            |           | 149.10    | 220.10 | 283.80 | 333.30 | 371.60 | 410.50 | Dead   |    |        |
|            | 2762          | 3/1            |           | 177.10    | 228.20 | 294.60 | 348.60 | 380.00 | 419.90 | Dead   |    |        |
|            | 2763          | 3/1            |           | 174.70    | 211.80 | 270.10 | 307.00 | 326.20 | 345.50 | Dead   |    |        |
|            | 2764          | 3/1            |           | 196.30    | 239.10 | 308.10 | 350.90 | 384.00 | 414.20 | Dead   |    |        |
|            | 2765          | 3/1            |           | 188.40    | 227.20 | 295.40 | 339.20 | 370.00 | 393.80 | Dead   |    |        |
|            | 2766          | 3/1            |           | 175.90    | 227.50 | 278.60 | 321.60 | 342.00 | 371.00 | Dead   |    |        |
|            | 2767          | 3/1            |           | 174.40    | 216.30 | 257.20 | 270.30 | 288.80 | 297.90 | Dead   |    |        |
|            | 2768          | 3/1            |           | 174.10    | 219.20 | 293.10 | 347.70 | 400.80 | 447.30 | Dead   |    |        |
|            | 2769          | 3/1            |           | 171.60    | 208.80 | 263.50 | 306.10 | 329.00 | 351.40 | Dead   |    |        |
|            |               | N              |           | 10        | 10     | 10     | 10     | 10     | 10     | 0      |    | 0      |
|            |               | Mean           |           | 176.41    | 222.75 | 283.82 | 326.04 | 355.11 | 383.27 | -      |    | -      |
|            |               | Sdev           |           | 12.286    | 9.177  | 16.202 | 25.391 | 33.557 | 43.635 | -      |    | -      |
| 800 mg/kg  |               |                |           |           |        |        |        |        |        |        |    |        |
|            | 2770          | 4/1            |           | 175.20    | 220.70 | 280.20 | 321.50 | 346.70 | 368.50 | Dead   |    |        |
|            | 2771          | 4/1            |           | 192.00    | 238.40 | 292.50 | 323.60 | 337.70 | 366.30 | Dead   |    |        |
|            | 2772          | 4/1            |           | 190.00    | 234.40 | 301.00 | 356.80 | 400.00 | 437.80 | Dead   |    |        |
|            | 2773          | 4/1            |           | 193.10    | 235.90 | 272.70 | 286.70 | 300.10 | 314.70 | Dead   |    |        |
|            | 2774          | 4/1            |           | 173.20    | 206.40 | 240.90 | 264.30 | 284.50 | 307.30 | Dead   |    |        |
|            | 2775          | 4/1            |           | 177.70    | 222.90 | 283.90 | 341.70 | 381.50 | 409.60 | Dead   |    |        |
|            | 2776          | 4/1            |           | 194.90    | 240.50 | 297.60 | 330.40 | 350.10 | 368.30 | Dead   |    |        |
|            | 2777          | 4/1            |           | 175.20    | 222.00 | 281.70 | 325.70 | 353.40 | 382.90 | Dead   |    |        |
|            | 2778          | 4/1            |           | 174.10    | 210.60 | 270.00 | 311.00 | 337.50 | 370.70 | Dead   |    |        |
|            | 2779          | 4/1            |           | 203.50    | 244.90 | 288.20 | 310.80 | 331.40 | 350.50 | Dead   |    |        |
|            | 2780          | 4/1            |           | 175.10    | 210.70 | 262.40 | 301.20 | 331.60 | 358.30 | 370.50 |    | 406.20 |
|            | 2781          | 4/1            |           | 185.00    | 225.10 | 271.70 | 297.70 | 319.20 | 339.70 | 348.00 |    | 368.50 |
|            | 2782          | 4/1            |           | 185.00    | 232.40 | 280.10 | 308.60 | 339.10 | 365.00 | 369.60 |    | 394.80 |
|            | 2783          | 4/1            |           | 189.50    | 234.70 | 294.90 | 350.30 | 380.10 | 405.50 | 417.80 |    | 450.20 |
|            | 2784          | 4/1            |           | 184.40    | 231.10 | 279.70 | 316.00 | 357.80 | 380.50 | 389.60 |    | 419.50 |
|            |               | N              |           | 15        | 15     | 15     | 15     | 15     | 15     | 5      |    | 5      |
|            |               | Mean           |           | 184.53    | 227.38 | 279.83 | 316.42 | 343.38 | 368.37 | 379.10 |    | 407.84 |
|            |               | Sdev           |           | 9.253     | 11.692 | 15.294 | 24.025 | 30.076 | 33.944 | 26.169 |    | 30.210 |

Note: " = Pretest phase (groups); # = Test period

CONFIDENTIAL

Appendix 2  
Body Weights (g)

Fexinidazole

Study Number: 0504-2007

| Dose Level | Animal Number | Group/Subgroup | Study Day | Females |        |        |        |        |        |        |        |  |
|------------|---------------|----------------|-----------|---------|--------|--------|--------|--------|--------|--------|--------|--|
|            |               |                |           | -4"     | 1#     | 8      | 14     | 21     | 28     | 35     | 42     |  |
| vehicle    |               |                |           |         |        |        |        |        |        |        |        |  |
|            | 2785          | 1/1            |           | 172.60  | 185.70 | 197.50 | 200.70 | 212.00 | 229.60 | Dead   |        |  |
|            | 2786          | 1/1            |           | 177.50  | 199.30 | 197.50 | 237.40 | 247.20 | 256.40 | Dead   |        |  |
|            | 2787          | 1/1            |           | 168.50  | 191.70 | 207.30 | 219.70 | 226.60 | 223.20 | Dead   |        |  |
|            | 2788          | 1/1            |           | 186.30  | 192.40 | 213.80 | 218.10 | 220.80 | 235.50 | Dead   |        |  |
|            | 2789          | 1/1            |           | 171.00  | 184.30 | 205.00 | 214.80 | 216.70 | 222.40 | Dead   |        |  |
|            | 2790          | 1/1            |           | 174.30  | 197.00 | 209.20 | 226.40 | 228.80 | 243.20 | Dead   |        |  |
|            | 2791          | 1/1            |           | 182.90  | 188.90 | 209.20 | 215.60 | 212.40 | 222.90 | Dead   |        |  |
|            | 2792          | 1/1            |           | 175.80  | 197.20 | 202.30 | 226.50 | 243.90 | 249.70 | Dead   |        |  |
|            | 2793          | 1/1            |           | 175.10  | 189.20 | 216.60 | 226.30 | 230.40 | 240.40 | Dead   |        |  |
|            | 2794          | 1/1            |           | 171.50  | 193.60 | 226.10 | 233.30 | 250.20 | 261.20 | Dead   |        |  |
|            | 2795          | 1/1            |           | 163.30  | 188.80 | 205.40 | 226.80 | 239.80 | 236.90 | 251.20 | 256.20 |  |
|            | 2796          | 1/1            |           | 163.30  | 179.80 | 211.00 | 223.30 | 232.20 | 232.60 | 249.50 | 256.80 |  |
|            | 2797          | 1/1            |           | 182.00  | 202.30 | 217.80 | 229.20 | 241.30 | 244.00 | 244.00 | 249.90 |  |
|            | 2798          | 1/1            |           | 179.30  | 220.10 | 231.40 | 242.40 | 249.80 | 258.50 | 268.90 | 275.60 |  |
|            | 2799          | 1/1            |           | 172.30  | 194.10 | 220.00 | 232.70 | 241.60 | 255.10 | 265.10 | 277.20 |  |
|            |               | N              |           | 15      | 15     | 15     | 15     | 15     | 15     | 5      | 5      |  |
|            |               | Mean           |           | 174.38  | 193.63 | 211.34 | 224.88 | 232.91 | 240.77 | 255.74 | 263.14 |  |
|            |               | Sdev           |           | 6.636   | 9.427  | 9.771  | 10.257 | 13.184 | 13.302 | 10.702 | 12.416 |  |
| 50 mg/kg   |               |                |           |         |        |        |        |        |        |        |        |  |
|            | 2800          | 2/1            |           | 166.80  | 185.70 | 194.70 | 196.00 | 214.80 | 222.20 | Dead   |        |  |
|            | 2801          | 2/1            |           | 178.10  | 196.90 | 220.00 | 238.50 | 243.70 | 259.40 | Dead   |        |  |
|            | 2802          | 2/1            |           | 170.90  | 190.60 | 215.90 | 231.20 | 245.00 | 248.00 | Dead   |        |  |
|            | 2803          | 2/1            |           | 162.20  | 187.70 | 199.40 | 217.10 | 230.80 | 229.90 | Dead   |        |  |
|            | 2804          | 2/1            |           | 164.00  | 177.50 | 190.60 | 209.10 | 219.50 | 215.90 | Dead   |        |  |
|            | 2805          | 2/1            |           | 180.40  | 202.70 | 208.10 | 230.80 | 243.60 | 250.40 | Dead   |        |  |
|            | 2806          | 2/1            |           | 168.10  | 195.30 | 217.20 | 214.90 | 233.50 | 245.00 | Dead   |        |  |
|            | 2807          | 2/1            |           | 171.10  | 190.40 | 217.20 | 222.60 | 236.90 | 241.60 | Dead   |        |  |
|            | 2808          | 2/1            |           | 177.40  | 201.70 | 216.20 | 241.50 | 254.10 | 255.50 | Dead   |        |  |
|            | 2809          | 2/1            |           | 182.30  | 205.50 | 221.40 | 246.60 | 257.60 | 261.70 | Dead   |        |  |
|            |               | N              |           | 10      | 10     | 10     | 10     | 10     | 10     | 0      | 0      |  |
|            |               | Mean           |           | 172.13  | 193.40 | 210.07 | 224.83 | 237.95 | 242.96 | -      | -      |  |
|            |               | Sdev           |           | 7.049   | 8.686  | 11.221 | 15.835 | 13.784 | 15.632 | -      | -      |  |

Note: " = Pretest phase (groups); # = Test period

CONFIDENTIAL

Appendix 2  
Body Weights (g)

Fexinidazole

Study Number: 0504-2007

| Dose Level | Animal Number | Group/Subgroup | Study Day | Females |        |        |        |        |        |        |    |        |
|------------|---------------|----------------|-----------|---------|--------|--------|--------|--------|--------|--------|----|--------|
|            |               |                |           | -4"     | 1#     | 8      | 14     | 21     | 28     | 35     | 42 |        |
| 200 mg/kg  |               |                |           |         |        |        |        |        |        |        |    |        |
|            | 2810          | 3/1            |           | 160.90  | 195.60 | 203.10 | 220.70 | 224.10 | 229.40 | Dead   |    |        |
|            | 2811          | 3/1            |           | 174.20  | 183.40 | 204.30 | 227.50 | 234.10 | 245.30 | Dead   |    |        |
|            | 2812          | 3/1            |           | 172.10  | 195.80 | 209.80 | 223.00 | 235.80 | 244.30 | Dead   |    |        |
|            | 2813          | 3/1            |           | 160.90  | 184.10 | 210.20 | 224.60 | 242.20 | 251.80 | Dead   |    |        |
|            | 2814          | 3/1            |           | 165.40  | 189.80 | 204.10 | 207.20 | 222.40 | 223.30 | Dead   |    |        |
|            | 2815          | 3/1            |           | 170.80  | 188.40 | 197.90 | 220.50 | 233.60 | 233.80 | Dead   |    |        |
|            | 2816          | 3/1            |           | 178.70  | 199.90 | 214.60 | 227.60 | 245.70 | 251.80 | Dead   |    |        |
|            | 2817          | 3/1            |           | 185.20  | 208.40 | 219.20 | 240.90 | 257.50 | 260.40 | Dead   |    |        |
|            | 2818          | 3/1            |           | 170.80  | 191.70 | 212.40 | 220.50 | 241.10 | 257.00 | Dead   |    |        |
|            | 2819          | 3/1            |           | 166.90  | 193.50 | 198.80 | 224.50 | 238.70 | 239.50 | Dead   |    |        |
|            |               | N              |           | 10      | 10     | 10     | 10     | 10     | 10     | 0      |    | 0      |
|            |               | Mean           |           | 170.59  | 193.06 | 207.44 | 223.70 | 237.52 | 243.66 | -      |    | -      |
|            |               | Sdev           |           | 7.623   | 7.484  | 6.935  | 8.361  | 10.225 | 12.139 | -      |    | -      |
| 800 mg/kg  |               |                |           |         |        |        |        |        |        |        |    |        |
|            | 2820          | 4/1            |           | 179.70  | 195.20 | 203.80 | 206.00 | 217.50 | 224.70 | Dead   |    |        |
|            | 2821          | 4/1            |           | 176.80  | 191.20 | 199.80 | 198.80 | 210.10 | 213.50 | Dead   |    |        |
|            | 2822          | 4/1            |           | 183.60  | 212.40 | 215.30 | 230.40 | 237.00 | 236.60 | Dead   |    |        |
|            | 2823          | 4/1            |           | 178.70  | 192.70 | 228.10 | 242.90 | 251.00 | 270.20 | Dead   |    |        |
|            | 2824          | 4/1            |           | 178.80  | 204.60 | 216.40 | Dead   |        |        |        |    |        |
|            | 2825          | 4/1            |           | 166.20  | 178.80 | 203.30 | 213.60 | 217.50 | 229.80 | Dead   |    |        |
|            | 2826          | 4/1            |           | 177.80  | 200.30 | 218.10 | 220.60 | 229.00 | 229.80 | Dead   |    |        |
|            | 2827          | 4/1            |           | 171.80  | 184.80 | 220.80 | 230.20 | 227.10 | 241.70 | Dead   |    |        |
|            | 2828          | 4/1            |           | 167.40  | 182.10 | 211.70 | 224.80 | 237.30 | 245.20 | Dead   |    |        |
|            | 2829          | 4/1            |           | 170.00  | 192.10 | 209.10 | 222.60 | 233.70 | 229.60 | Dead   |    |        |
|            | 2830          | 4/1            |           | 182.80  | 201.50 | 220.80 | 235.70 | 234.00 | 248.40 | 258.40 |    | 264.60 |
|            | 2831          | 4/1            |           | 162.00  | 167.40 | 197.10 | 207.00 | 206.80 | 226.00 | 226.90 |    | 228.70 |
|            | 2832          | 4/1            |           | 171.10  | 188.00 | 194.30 | 215.00 | 220.60 | 215.90 | 224.70 |    | 233.90 |
|            | 2833          | 4/1            |           | 168.30  | 192.90 | 209.10 | 226.10 | 237.60 | 243.90 | 239.70 |    | 258.70 |
|            | 2834          | 4/1            |           | 170.80  | 187.60 | 216.60 | 228.30 | 238.00 | 245.20 | 244.00 |    | 254.70 |
|            |               | N              |           | 15      | 15     | 15     | 14     | 14     | 14     | 5      |    | 5      |
|            |               | Mean           |           | 173.72  | 191.44 | 210.95 | 221.57 | 228.37 | 235.75 | 238.74 |    | 248.12 |
|            |               | Sdev           |           | 6.485   | 11.039 | 9.748  | 12.295 | 12.410 | 14.788 | 13.715 |    | 15.860 |

Note: " = Pretest phase (groups); # = Test period

## ***Appendix 3 Food Consumption***

CONFIDENTIAL

Appendix 3  
Feed Consumed per Day (g)

Fexinidazole

Study Number: 0504-2007

|            |               | M a l e s       |           |       |       |       |       |       |       |
|------------|---------------|-----------------|-----------|-------|-------|-------|-------|-------|-------|
| Dose Level | Animal Number | Group/ Subgroup | Study Day | 8     | 14    | 21    | 28    | 35    | 42    |
| -----      |               |                 |           |       |       |       |       |       |       |
| vehicle    |               |                 |           |       |       |       |       |       |       |
|            | 2735-2737     | 1/1             |           | 31.12 | 30.64 | 30.39 | 30.90 | -     | -     |
|            | 2738-2739     | 1/1             |           | 28.25 | 29.52 | 29.75 | 30.09 | -     | -     |
|            | 2740-2742     | 1/1             |           | 27.59 | 28.84 | 29.75 | 29.14 | -     | -     |
|            | 2743-2744     | 1/1             |           | 27.99 | 29.85 | 28.72 | 29.95 | -     | -     |
|            | 2745-2747     | 1/1             |           | 25.18 | 28.25 | 28.22 | 28.06 | 28.47 | 29.64 |
|            | 2748-2749     | 1/1             |           | 28.16 | 27.13 | 26.88 | 28.07 | 30.55 | 31.43 |
|            |               | N               |           | 15    | 15    | 15    | 15    | 5     | 5     |
|            |               | Mean            |           | 28.05 | 29.04 | 28.95 | 29.37 | 29.51 | 30.53 |
|            |               | Sdev            |           | 1.90  | 1.25  | 1.28  | 1.15  | 1.47  | 1.27  |
| 50 mg/kg   |               |                 |           |       |       |       |       |       |       |
|            | 2750-2752     | 2/1             |           | 25.13 | 31.17 | 31.48 | 26.07 | -     | -     |
|            | 2753-2754     | 2/1             |           | 29.29 | 28.64 | 27.10 | 26.82 | -     | -     |
|            | 2755-2757     | 2/1             |           | 26.86 | 28.48 | 27.65 | 27.78 | -     | -     |
|            | 2758-2759     | 2/1             |           | 27.29 | 28.71 | 27.69 | 27.82 | -     | -     |
|            |               | N               |           | 10    | 10    | 10    | 10    | 0     | 0     |
|            |               | Mean            |           | 27.14 | 29.25 | 28.48 | 27.12 | -     | -     |
|            |               | Sdev            |           | 1.71  | 1.29  | 2.02  | 0.84  | -     | -     |
| 200 mg/kg  |               |                 |           |       |       |       |       |       |       |
|            | 2760-2762     | 3/1             |           | 27.64 | 29.79 | 28.41 | 27.35 | -     | -     |
|            | 2763-2764     | 3/1             |           | 26.39 | 26.80 | 25.95 | 26.14 | -     | -     |
|            | 2765-2767     | 3/1             |           | 26.30 | 26.31 | 25.04 | 24.60 | -     | -     |
|            | 2768-2769     | 3/1             |           | 27.01 | 27.97 | 28.95 | 28.49 | -     | -     |
|            |               | N               |           | 10    | 10    | 10    | 10    | 0     | 0     |
|            |               | Mean            |           | 26.84 | 27.72 | 27.09 | 26.65 | -     | -     |
|            |               | Sdev            |           | 0.62  | 1.55  | 1.89  | 1.66  | -     | -     |

Note: Data for Test period  
- Missing data

CONFIDENTIAL

Appendix 3  
Feed Consumed per Day (g)

Fexinidazole

Study Number: 0504-2007

|            |               |                 |           | M a l e s |       |       |       |       |       |
|------------|---------------|-----------------|-----------|-----------|-------|-------|-------|-------|-------|
| Dose Level | Animal Number | Group/ Subgroup | Study Day | 8         | 14    | 21    | 28    | 35    | 42    |
| 800 mg/kg  |               |                 |           |           |       |       |       |       |       |
|            | 2770-2772     | 4/1             |           | 27.43     | 30.17 | 29.12 | 28.16 | -     | -     |
|            | 2773-2774     | 4/1             |           | 22.99     | 21.64 | 20.86 | 21.66 | -     | -     |
|            | 2775-2777     | 4/1             |           | 25.70     | 30.04 | 28.45 | 27.70 | -     | -     |
|            | 2778-2779     | 4/1             |           | 24.89     | 27.55 | 26.27 | 25.09 | -     | -     |
|            | 2780-2782     | 4/1             |           | 24.16     | 25.79 | 24.30 | 24.02 | 26.32 | 27.01 |
|            | 2783-2784     | 4/1             |           | 25.89     | 30.83 | 30.00 | 29.18 | 30.68 | 30.54 |
|            |               | N               |           | 15        | 15    | 15    | 15    | 5     | 5     |
|            |               | Mean            |           | 25.18     | 27.67 | 26.50 | 25.97 | 28.50 | 28.78 |
|            |               | Sdev            |           | 1.54      | 3.51  | 3.45  | 2.87  | 3.08  | 2.50  |

Note: Data for Test period

- Missing data

CONFIDENTIAL

Appendix 3  
Feed Consumed per Day (g)

Fexinidazole

Study Number: 0504-2007

| Dose Level | Animal Number | Group/ Subgroup | Study Day | F e m a l e s |       |       |       |       |       |
|------------|---------------|-----------------|-----------|---------------|-------|-------|-------|-------|-------|
|            |               |                 |           | 8             | 14    | 21    | 28    | 35    | 42    |
| vehicle    |               |                 |           |               |       |       |       |       |       |
|            | 2785-2787     | 1/1             |           | 11.04         | 17.74 | 17.43 | 17.47 | -     | -     |
|            | 2788-2789     | 1/1             |           | 17.45         | 16.75 | 16.47 | 18.29 | -     | -     |
|            | 2790-2792     | 1/1             |           | 16.06         | 17.37 | 17.08 | 17.64 | -     | -     |
|            | 2793-2794     | 1/1             |           | 18.98         | 19.39 | 19.29 | 20.61 | -     | -     |
|            | 2795-2797     | 1/1             |           | 17.15         | 18.49 | 18.08 | 17.91 | 19.58 | 18.64 |
|            | 2798-2799     | 1/1             |           | 18.62         | 18.33 | 18.09 | 18.96 | 20.67 | 19.04 |
|            |               | N               |           | 15            | 15    | 15    | 15    | 5     | 5     |
|            |               | Mean            |           | 16.55         | 18.01 | 17.74 | 18.48 | 20.12 | 18.84 |
|            |               | Sdev            |           | 2.90          | 0.93  | 0.98  | 1.17  | 0.77  | 0.28  |
| 50 mg/kg   |               |                 |           |               |       |       |       |       |       |
|            | 2800-2802     | 2/1             |           | 16.64         | 18.30 | 18.19 | 18.52 | -     | -     |
|            | 2803-2804     | 2/1             |           | 16.99         | 18.65 | 17.71 | 17.42 | -     | -     |
|            | 2805-2807     | 2/1             |           | 16.55         | 17.76 | 18.61 | 18.62 | -     | -     |
|            | 2808-2809     | 2/1             |           | 18.37         | 20.92 | 20.63 | 20.89 | -     | -     |
|            |               | N               |           | 10            | 10    | 10    | 10    | 0     | 0     |
|            |               | Mean            |           | 17.14         | 18.91 | 18.78 | 18.86 | -     | -     |
|            |               | Sdev            |           | 0.84          | 1.39  | 1.28  | 1.45  | -     | -     |
| 200 mg/kg  |               |                 |           |               |       |       |       |       |       |
|            | 2810-2812     | 3/1             |           | 16.35         | 18.11 | 17.53 | 18.28 | -     | -     |
|            | 2813-2814     | 3/1             |           | 16.77         | 17.23 | 17.30 | 16.70 | -     | -     |
|            | 2815-2817     | 3/1             |           | 16.89         | 18.26 | 17.90 | 18.38 | -     | -     |
|            | 2818-2819     | 3/1             |           | 18.65         | 18.98 | 21.17 | 21.76 | -     | -     |
|            |               | N               |           | 10            | 10    | 10    | 10    | 0     | 0     |
|            |               | Mean            |           | 17.16         | 18.14 | 18.48 | 18.78 | -     | -     |
|            |               | Sdev            |           | 1.02          | 0.72  | 1.81  | 2.13  | -     | -     |

Note: Data for Test period

- Missing data



CONFIDENTIAL

Appendix 3  
Feed Consumed per Day (g)

Fexinidazole

Study Number: 0504-2007

|            |               |                 |           | F e m a l e s |       |       |       |       |       |
|------------|---------------|-----------------|-----------|---------------|-------|-------|-------|-------|-------|
| Dose Level | Animal Number | Group/ Subgroup | Study Day | 8             | 14    | 21    | 28    | 35    | 42    |
| 800 mg/kg  |               |                 |           |               |       |       |       |       |       |
|            | 2820-2822     | 4/1             |           | 13.68         | 17.27 | 18.27 | 17.79 | -     | -     |
|            | 2823-2824     | 4/1             |           | 15.29         | 16.13 | 21.11 | 22.27 | -     | -     |
|            | 2825-2827     | 4/1             |           | 14.50         | 18.09 | 17.67 | 17.92 | -     | -     |
|            | 2828-2829     | 4/1             |           | 15.79         | 19.38 | 19.92 | 19.89 | -     | -     |
|            | 2830-2832     | 4/1             |           | 14.52         | 17.42 | 17.50 | 18.61 | 20.17 | 18.10 |
|            | 2833-2834     | 4/1             |           | 15.55         | 18.95 | 18.93 | 20.81 | 20.59 | 19.71 |
|            |               | N               |           | 15            | 15    | 14    | 14    | 5     | 5     |
|            |               | Mean            |           | 14.89         | 17.87 | 18.90 | 19.55 | 20.38 | 18.91 |
|            |               | Sdev            |           | 0.79          | 1.19  | 1.40  | 1.78  | 0.30  | 1.14  |

Note: Data for Test period

- Missing data

## ***Appendix 4 Ophthalmoscopic Findings***

CONFIDENTIAL

Appendix 4  
Individual Animal Ophthalmoscopic Observations

Fexinidazole

Study Number: 0504-2007

M a l e s

| Animal Number | Dose    | Clinical Signs | Study Day(s) Noted                             |
|---------------|---------|----------------|------------------------------------------------|
| 2735          | vehicle | NORMAL         | Pretest phase (groups) -4<br>Test period 28    |
| 2736          | vehicle | NORMAL         | Pretest phase (groups) -4<br>Test period 28    |
| 2737          | vehicle | NORMAL         | Pretest phase (groups) -4<br>Test period 28    |
| 2738          | vehicle | NORMAL         | Pretest phase (groups) -4<br>Test period 28    |
| 2739          | vehicle | NORMAL         | Pretest phase (groups) -4<br>Test period 28    |
| 2740          | vehicle | NORMAL         | Pretest phase (groups) -4<br>Test period 28    |
| 2741          | vehicle | NORMAL         | Pretest phase (groups) -4<br>Test period 28    |
| 2742          | vehicle | NORMAL         | Pretest phase (groups) -4<br>Test period 28    |
| 2743          | vehicle | NORMAL         | Pretest phase (groups) -4<br>Test period 28    |
| 2744          | vehicle | NORMAL         | Pretest phase (groups) -4<br>Test period 28    |
| 2745          | vehicle | NORMAL         | Pretest phase (groups) -4<br>Test period 28,42 |

CONFIDENTIAL

Appendix 4  
Individual Animal Ophthalmoscopic Observations

Fexinidazole

Study Number: 0504-2007

M a l e s

| Animal Number | Dose    | Clinical Signs | Study Day(s) Noted                             |
|---------------|---------|----------------|------------------------------------------------|
| 2746          | vehicle | NORMAL         | Pretest phase (groups) -4<br>Test period 28,42 |
| 2747          | vehicle | NORMAL         | Pretest phase (groups) -4<br>Test period 28,42 |
| 2748          | vehicle | NORMAL         | Pretest phase (groups) -4<br>Test period 28,42 |
| 2749          | vehicle | NORMAL         | Pretest phase (groups) -4<br>Test period 28,42 |
| 2750          | 50mg/kg | NORMAL         | Pretest phase (groups) -4<br>Test period 28    |
| 2751          | 50mg/kg | NORMAL         | Pretest phase (groups) -4<br>Test period 28    |
| 2752          | 50mg/kg | NORMAL         | Pretest phase (groups) -4<br>Test period 28    |
| 2753          | 50mg/kg | NORMAL         | Pretest phase (groups) -4<br>Test period 28    |
| 2754          | 50mg/kg | NORMAL         | Pretest phase (groups) -4<br>Test period 28    |
| 2755          | 50mg/kg | NORMAL         | Pretest phase (groups) -4<br>Test period 28    |
| 2756          | 50mg/kg | NORMAL         | Pretest phase (groups) -4<br>Test period 28    |

CONFIDENTIAL

Appendix 4  
Individual Animal Ophthalmoscopic Observations

Fexinidazole

Study Number: 0504-2007

M a l e s

| Animal Number | Dose     | Clinical Signs | Study Day(s) Noted                          |
|---------------|----------|----------------|---------------------------------------------|
| 2757          | 50mg/kg  | NORMAL         | Pretest phase (groups) -4<br>Test period 28 |
| 2758          | 50mg/kg  | NORMAL         | Pretest phase (groups) -4<br>Test period 28 |
| 2759          | 50mg/kg  | NORMAL         | Pretest phase (groups) -4<br>Test period 28 |
| 2760          | 200mg/kg | NORMAL         | Pretest phase (groups) -4<br>Test period 28 |
| 2761          | 200mg/kg | NORMAL         | Pretest phase (groups) -4<br>Test period 28 |
| 2762          | 200mg/kg | NORMAL         | Pretest phase (groups) -4<br>Test period 28 |
| 2763          | 200mg/kg | NORMAL         | Pretest phase (groups) -4<br>Test period 28 |
| 2764          | 200mg/kg | NORMAL         | Pretest phase (groups) -4<br>Test period 28 |
| 2765          | 200mg/kg | NORMAL         | Pretest phase (groups) -4<br>Test period 28 |
| 2766          | 200mg/kg | NORMAL         | Pretest phase (groups) -4<br>Test period 28 |
| 2767          | 200mg/kg | NORMAL         | Pretest phase (groups) -4<br>Test period 28 |

CONFIDENTIAL

Appendix 4  
Individual Animal Ophthalmoscopic Observations

Fexinidazole

Study Number: 0504-2007

M a l e s

| Animal Number | Dose     | Clinical Signs | Study Day(s) Noted                          |
|---------------|----------|----------------|---------------------------------------------|
| 2768          | 200mg/kg | NORMAL         | Pretest phase (groups) -4<br>Test period 28 |
| 2769          | 200mg/kg | NORMAL         | Pretest phase (groups) -4<br>Test period 28 |
| 2770          | 800mg/kg | NORMAL         | Pretest phase (groups) -4<br>Test period 28 |
| 2771          | 800mg/kg | NORMAL         | Pretest phase (groups) -4<br>Test period 28 |
| 2772          | 800mg/kg | NORMAL         | Pretest phase (groups) -4<br>Test period 28 |
| 2773          | 800mg/kg | NORMAL         | Pretest phase (groups) -4<br>Test period 28 |
| 2774          | 800mg/kg | NORMAL         | Pretest phase (groups) -4<br>Test period 28 |
| 2775          | 800mg/kg | NORMAL         | Pretest phase (groups) -4<br>Test period 28 |
| 2776          | 800mg/kg | NORMAL         | Pretest phase (groups) -4<br>Test period 28 |
| 2777          | 800mg/kg | NORMAL         | Pretest phase (groups) -4<br>Test period 28 |
| 2778          | 800mg/kg | NORMAL         | Pretest phase (groups) -4<br>Test period 28 |

CONFIDENTIAL

Appendix 4  
Individual Animal Ophthalmoscopic Observations

Fexinidazole

Study Number: 0504-2007

M a l e s

| Animal Number | Dose     | Clinical Signs | Study Day(s) Noted                             |
|---------------|----------|----------------|------------------------------------------------|
| 2779          | 800mg/kg | NORMAL         | Pretest phase (groups) -4<br>Test period 28    |
| 2780          | 800mg/kg | NORMAL         | Pretest phase (groups) -4<br>Test period 28,42 |
| 2781          | 800mg/kg | NORMAL         | Pretest phase (groups) -4<br>Test period 28,42 |
| 2782          | 800mg/kg | NORMAL         | Pretest phase (groups) -4<br>Test period 28,42 |
| 2783          | 800mg/kg | NORMAL         | Pretest phase (groups) -4<br>Test period 28,42 |
| 2784          | 800mg/kg | NORMAL         | Pretest phase (groups) -4<br>Test period 28,42 |

CONFIDENTIAL

Appendix 4  
Individual Animal Ophthalmoscopic Observations

Fexinidazole

Study Number: 0504-2007

F e m a l e

| Animal Number | Dose    | Clinical Signs | Study Day(s) Noted                             |
|---------------|---------|----------------|------------------------------------------------|
| 2785          | vehicle | NORMAL         | Pretest phase (groups) -3<br>Test period 28    |
| 2786          | vehicle | NORMAL         | Pretest phase (groups) -3<br>Test period 28    |
| 2787          | vehicle | NORMAL         | Pretest phase (groups) -3<br>Test period 28    |
| 2788          | vehicle | NORMAL         | Pretest phase (groups) -3<br>Test period 28    |
| 2789          | vehicle | NORMAL         | Pretest phase (groups) -3<br>Test period 28    |
| 2790          | vehicle | NORMAL         | Pretest phase (groups) -3<br>Test period 28    |
| 2791          | vehicle | NORMAL         | Pretest phase (groups) -3<br>Test period 28    |
| 2792          | vehicle | NORMAL         | Pretest phase (groups) -3<br>Test period 28    |
| 2793          | vehicle | NORMAL         | Pretest phase (groups) -3<br>Test period 28    |
| 2794          | vehicle | NORMAL         | Pretest phase (groups) -3<br>Test period 28    |
| 2795          | vehicle | NORMAL         | Pretest phase (groups) -3<br>Test period 28,42 |



CONFIDENTIAL

Appendix 4  
Individual Animal Ophthalmoscopic Observations

Fexinidazole

Study Number: 0504-2007

F e m a l e

| Animal Number | Dose    | Clinical Signs | Study Day(s) Noted                             |
|---------------|---------|----------------|------------------------------------------------|
| 2796          | vehicle | NORMAL         | Pretest phase (groups) -3<br>Test period 28,42 |
| 2797          | vehicle | NORMAL         | Pretest phase (groups) -3<br>Test period 28,42 |
| 2798          | vehicle | NORMAL         | Pretest phase (groups) -3<br>Test period 28,42 |
| 2799          | vehicle | NORMAL         | Pretest phase (groups) -3<br>Test period 28,42 |
| 2800          | 50mg/kg | NORMAL         | Pretest phase (groups) -3<br>Test period 28    |
| 2801          | 50mg/kg | NORMAL         | Pretest phase (groups) -3<br>Test period 28    |
| 2802          | 50mg/kg | NORMAL         | Pretest phase (groups) -3<br>Test period 28    |
| 2803          | 50mg/kg | NORMAL         | Pretest phase (groups) -3<br>Test period 28    |
| 2804          | 50mg/kg | NORMAL         | Pretest phase (groups) -3<br>Test period 28    |
| 2805          | 50mg/kg | NORMAL         | Pretest phase (groups) -3<br>Test period 28    |
| 2806          | 50mg/kg | NORMAL         | Pretest phase (groups) -3<br>Test period 28    |

CONFIDENTIAL

Appendix 4  
Individual Animal Ophthalmoscopic Observations

Fexinidazole

Study Number: 0504-2007

F e m a l e

| Animal Number | Dose     | Clinical Signs | Study Day(s) Noted                          |
|---------------|----------|----------------|---------------------------------------------|
| 2807          | 50mg/kg  | NORMAL         | Pretest phase (groups) -3<br>Test period 28 |
| 2808          | 50mg/kg  | NORMAL         | Pretest phase (groups) -3<br>Test period 28 |
| 2809          | 50mg/kg  | NORMAL         | Pretest phase (groups) -3<br>Test period 28 |
| 2810          | 200mg/kg | NORMAL         | Pretest phase (groups) -3<br>Test period 28 |
| 2811          | 200mg/kg | NORMAL         | Pretest phase (groups) -3<br>Test period 28 |
| 2812          | 200mg/kg | NORMAL         | Pretest phase (groups) -3<br>Test period 28 |
| 2813          | 200mg/kg | NORMAL         | Pretest phase (groups) -3<br>Test period 28 |
| 2814          | 200mg/kg | NORMAL         | Pretest phase (groups) -3<br>Test period 28 |
| 2815          | 200mg/kg | NORMAL         | Pretest phase (groups) -3<br>Test period 28 |
| 2816          | 200mg/kg | NORMAL         | Pretest phase (groups) -3<br>Test period 28 |
| 2817          | 200mg/kg | NORMAL         | Pretest phase (groups) -3<br>Test period 28 |

CONFIDENTIAL

Appendix 4  
Individual Animal Ophthalmoscopic Observations

Fexinidazole

Study Number: 0504-2007

F e m a l e

| Animal Number | Dose     | Clinical Signs | Study Day(s) Noted                          |
|---------------|----------|----------------|---------------------------------------------|
| 2818          | 200mg/kg | NORMAL         | Pretest phase (groups) -3<br>Test period 28 |
| 2819          | 200mg/kg | NORMAL         | Pretest phase (groups) -3<br>Test period 28 |
| 2820          | 800mg/kg | NORMAL         | Pretest phase (groups) -3<br>Test period 28 |
| 2821          | 800mg/kg | NORMAL         | Pretest phase (groups) -3<br>Test period 28 |
| 2822          | 800mg/kg | NORMAL         | Pretest phase (groups) -3<br>Test period 28 |
| 2823          | 800mg/kg | NORMAL         | Pretest phase (groups) -3<br>Test period 28 |
| 2824          | 800mg/kg | NORMAL         | Pretest phase (groups) -3                   |
| 2825          | 800mg/kg | NORMAL         | Pretest phase (groups) -3<br>Test period 28 |
| 2826          | 800mg/kg | NORMAL         | Pretest phase (groups) -3<br>Test period 28 |
| 2827          | 800mg/kg | NORMAL         | Pretest phase (groups) -3<br>Test period 28 |
| 2828          | 800mg/kg | NORMAL         | Pretest phase (groups) -3<br>Test period 28 |
| 2829          | 800mg/kg | NORMAL         | Pretest phase (groups) -3                   |

CONFIDENTIAL

Appendix 4  
Individual Animal Ophthalmoscopic Observations

Fexinidazole

Study Number: 0504-2007

F e m a l e

| Animal Number | Dose     | Clinical Signs | Study Day(s) Noted                             |
|---------------|----------|----------------|------------------------------------------------|
| 2829          | 800mg/kg | NORMAL         | Test period 28                                 |
| 2830          | 800mg/kg | NORMAL         | Pretest phase (groups) -3<br>Test period 28,42 |
| 2831          | 800mg/kg | NORMAL         | Pretest phase (groups) -3<br>Test period 28,42 |
| 2832          | 800mg/kg | NORMAL         | Pretest phase (groups) -3<br>Test period 28,42 |
| 2833          | 800mg/kg | NORMAL         | Pretest phase (groups) -3<br>Test period 28,42 |
| 2834          | 800mg/kg | NORMAL         | Pretest phase (groups) -3<br>Test period 28,42 |

## ***Appendix 5 Hematology***

CONFIDENTIAL

Appendix 5  
Day 29 Hematology Data  
Test period

Session 1 (Scheduled)  
Fexinidazole

Study Number: 0504-2007

| M a l e s  |               |                 |           |                          |          |       |        |        |           |       |          |
|------------|---------------|-----------------|-----------|--------------------------|----------|-------|--------|--------|-----------|-------|----------|
| Dose Level | Animal Number | Group/ Subgroup | Study Day | RBC 10 <sup>6</sup> /mcL | HGB g/dL | HCT % | MCV fL | MCH pg | MCHC g/dL | RDW % | HDW g/dL |
| vehicle    |               |                 |           |                          |          |       |        |        |           |       |          |
|            | 2745          | 1/1             | 29        | 8.42                     | 15.8     | 47.3  | 56.1   | 18.7   | 33.4      | 10.5  | 2.66     |
|            | 2746          | 1/1             | 29        | 9.02                     | 15.4     | 47.8  | 53.0   | 17.1   | 32.2      | 11.1  | 2.57     |
|            | 2747          | 1/1             | 29        | 8.09                     | 15.2     | 46.6  | 57.7   | 18.9   | 32.7      | 11.0  | 2.64     |
|            | 2748          | 1/1             | 29        | 8.61                     | 15.2     | 47.1  | 54.7   | 17.6   | 32.2      | 11.2  | 2.51     |
|            | 2749          | 1/1             | 29        | 9.36                     | 16.7     | 50.7  | 54.1   | 17.9   | 33.0      | 10.7  | 2.62     |
|            |               |                 | N         | 5                        | 5        | 5     | 5      | 5      | 5         | 5     | 5        |
|            |               |                 | Mean      | 8.70                     | 15.7     | 47.9  | 55.1   | 18.0   | 32.7      | 10.9  | 2.60     |
|            |               |                 | Sdev      | 0.499                    | 0.63     | 1.62  | 1.83   | 0.75   | 0.52      | 0.29  | 0.060    |
| 50 mg/kg   |               |                 |           |                          |          |       |        |        |           |       |          |
|            | 2755          | 2/1             | 29        | 8.16                     | 15.8     | 48.2  | 59.1   | 19.3   | 32.7      | 11.2  | 2.61     |
|            | 2756          | 2/1             | 29        | 8.65                     | 15.3     | 47.6  | 55.0   | 17.7   | 32.2      | 10.3  | 2.58     |
|            | 2757          | 2/1             | 29        | 8.52                     | 15.2     | 47.0  | 55.1   | 17.8   | 32.3      | 10.9  | 2.61     |
|            | 2758          | 2/1             | 29        | 8.01                     | 14.8     | 45.3  | 56.6   | 18.5   | 32.7      | 10.9  | 2.70     |
|            | 2759          | 2/1             | 29        | 8.39                     | 15.1     | 47.0  | 56.0   | 18.0   | 32.1      | 11.5  | 2.66     |
|            |               |                 | N         | 5                        | 5        | 5     | 5      | 5      | 5         | 5     | 5        |
|            |               |                 | Mean      | 8.35                     | 15.2     | 47.0  | 56.4   | 18.3   | 32.4      | 11.0  | 2.63     |
|            |               |                 | Sdev      | 0.261                    | 0.36     | 1.08  | 1.67   | 0.66   | 0.28      | 0.44  | 0.048    |
| 200 mg/kg  |               |                 |           |                          |          |       |        |        |           |       |          |
|            | 2765          | 3/1             | 29        | 8.40                     | 15.7     | 47.4  | 56.5   | 18.7   | 33.1      | 10.4  | 2.53     |
|            | 2766          | 3/1             | 29        | 8.30                     | 15.5     | 47.6  | 57.4   | 18.7   | 32.6      | 10.5  | 2.64     |
|            | 2767          | 3/1             | 29        | 8.80                     | 15.1     | 47.1  | 53.5   | 17.1   | 32.0      | 11.3  | 2.79     |
|            | 2768          | 3/1             | 29        | 8.06                     | 15.4     | 48.2  | 59.8   | 19.1   | 31.9      | 11.2  | 2.64     |
|            | 2769          | 3/1             | 29        | 8.91                     | 16.1     | 49.9  | 56.1   | 18.1   | 32.3      | 10.3  | 2.62     |
|            |               |                 | N         | 5                        | 5        | 5     | 5      | 5      | 5         | 5     | 5        |
|            |               |                 | Mean      | 8.49                     | 15.6     | 48.0  | 56.7   | 18.3   | 32.4      | 10.7  | 2.64     |
|            |               |                 | Sdev      | 0.354                    | 0.37     | 1.11  | 2.28   | 0.78   | 0.49      | 0.47  | 0.093    |

RBC - RED BLOOD CELLS  
MCV - MEAN CORPUSCULAR VOLUME  
RDW - RED CELL DISTRIBUTION WIDTH

HGB - HEMOGLOBIN  
MCH - MEAN CORPUSCULAR HEMOGLOBIN  
HDW - HEMOGLOBIN DISTRIB. WIDTH

HCT - HEMATOCRIT  
MCHC - MEAN CORPUSCULAR HGB CONC.

CONFIDENTIAL

Appendix 5  
Day 29 Hematology Data  
Test period

Session 1 (Scheduled)  
Fexinidazole

Study Number: 0504-2007

| M a l e s  |               |                 |           |                          |          |       |        |        |           |       |          |
|------------|---------------|-----------------|-----------|--------------------------|----------|-------|--------|--------|-----------|-------|----------|
| Dose Level | Animal Number | Group/ Subgroup | Study Day | RBC 10 <sup>6</sup> /mcL | HGB g/dL | HCT % | MCV fL | MCH pg | MCHC g/dL | RDW % | HDW g/dL |
| 800 mg/kg  |               |                 |           |                          |          |       |        |        |           |       |          |
|            | 2780          | 4/1             | 29        | 8.07                     | 15.1     | 45.8  | 56.8   | 18.8   | 33.0      | 10.4  | 2.79     |
|            | 2781          | 4/1             | 29        | 8.15                     | 15.4     | 46.0  | 56.4   | 18.9   | 33.5      | 11.0  | 3.25     |
|            | 2782          | 4/1             | 29        | 8.90                     | 15.7     | 49.7  | 55.8   | 17.7   | 31.7      | 10.6  | 2.83     |
|            | 2783          | 4/1             | 29        | 8.24                     | 15.4     | 46.6  | 56.6   | 18.7   | 33.0      | 11.7  | 2.77     |
|            | 2784          | 4/1             | 29        | 8.13                     | 14.9     | 45.9  | 56.5   | 18.4   | 32.5      | 11.0  | 2.74     |
|            |               |                 | N         | 5                        | 5        | 5     | 5      | 5      | 5         | 5     | 5        |
|            |               |                 | Mean      | 8.30                     | 15.3     | 46.8  | 56.4   | 18.5   | 32.7      | 10.9  | 2.88     |
|            |               |                 | Sdev      | 0.342                    | 0.31     | 1.65  | 0.38   | 0.48   | 0.68      | 0.50  | 0.212    |

RBC - RED BLOOD CELLS  
MCV - MEAN CORPUSCULAR VOLUME  
RDW - RED CELL DISTRIBUTION WIDTH

HGB - HEMOGLOBIN  
MCH - MEAN CORPUSCULAR HEMOGLOBIN  
HDW - HEMOGLOBIN DISTRIB. WIDTH

HCT - HEMATOCRIT  
MCHC - MEAN CORPUSCULAR HGB CONC.

CONFIDENTIAL

Appendix 5  
Day 29 Hematology Data  
Test period

Session 1 (Scheduled)  
Fexinidazole

Study Number: 0504-2007

| M a l e s  |               |                 |           |      |                        |         |           |        |                          |        |       |
|------------|---------------|-----------------|-----------|------|------------------------|---------|-----------|--------|--------------------------|--------|-------|
| Dose Level | Animal Number | Group/ Subgroup | Study Day | R %  | RAB 10 <sup>9</sup> /L | MCVr fL | CHCM g/dL | CHr pg | PLT 10 <sup>3</sup> /mcL | MPV fL | PDW % |
| vehicle    |               |                 |           |      |                        |         |           |        |                          |        |       |
|            | 2745          | 1/1             | 29        | 2.4  | 201.5                  | 63.2    | 29.8      | 18.8   | 1341.                    | 6.8    | 52.1  |
|            | 2746          | 1/1             | 29        | 2.5  | 223.5                  | 60.3    | 29.6      | 17.8   | 1223.                    | 6.6    | 56.3  |
|            | 2747          | 1/1             | 29        | 3.1  | 249.7                  | 64.6    | 30.1      | 19.4   | 1266.                    | 6.5    | 55.2  |
|            | 2748          | 1/1             | 29        | 2.6  | 225.4                  | 61.2    | 30.0      | 18.3   | 1094.                    | 6.8    | 58.6  |
|            | 2749          | 1/1             | 29        | 2.3  | 216.8                  | 61.7    | 30.3      | 18.7   | 1247.                    | 6.9    | 52.5  |
|            |               |                 | N         | 5    | 5                      | 5       | 5         | 5      | 5                        | 5      | 5     |
|            |               |                 | Mean      | 2.6  | 223.4                  | 62.2    | 30.0      | 18.6   | 1234.                    | 6.7    | 54.9  |
|            |               |                 | Sdev      | 0.31 | 17.46                  | 1.70    | 0.27      | 0.60   | 89.9                     | 0.16   | 2.71  |
| 50 mg/kg   |               |                 |           |      |                        |         |           |        |                          |        |       |
|            | 2755          | 2/1             | 29        | 2.9  | 233.1                  | 64.7    | 30.0      | 19.4   | 1535.                    | 7.4    | 52.9  |
|            | 2756          | 2/1             | 29        | 1.9  | 165.5                  | 62.7    | 29.4      | 18.4   | 1232.                    | 6.6    | 53.6  |
|            | 2757          | 2/1             | 29        | 2.2  | 190.7                  | 62.8    | 29.4      | 18.4   | 1539.                    | 6.9    | 53.2  |
|            | 2758          | 2/1             | 29        | 2.5  | 202.5                  | 64.9    | 29.9      | 19.3   | 1360.                    | 6.3    | 50.8  |
|            | 2759          | 2/1             | 29        | 2.8  | 233.4                  | 64.2    | 29.6      | 19.0   | 1387.                    | 6.2    | 53.0  |
|            |               |                 | N         | 5    | 5                      | 5       | 5         | 5      | 5                        | 5      | 5     |
|            |               |                 | Mean      | 2.5  | 205.0                  | 63.9    | 29.7      | 18.9   | 1411.                    | 6.7    | 52.7  |
|            |               |                 | Sdev      | 0.39 | 29.01                  | 1.05    | 0.28      | 0.48   | 129.4                    | 0.49   | 1.10  |
| 200 mg/kg  |               |                 |           |      |                        |         |           |        |                          |        |       |
|            | 2765          | 3/1             | 29        | 1.9  | 158.9                  | 65.0    | 30.4      | 19.7   | 1255.                    | 6.4    | 53.4  |
|            | 2766          | 3/1             | 29        | 2.4  | 194.6                  | 64.2    | 29.9      | 19.2   | 960.                     | 6.7    | 57.2  |
|            | 2767          | 3/1             | 29        | 1.8  | 158.2                  | 61.4    | 29.5      | 18.1   | 993.                     | 6.6    | 55.5  |
|            | 2768          | 3/1             | 29        | 3.7  | 301.7                  | 66.7    | 30.5      | 20.4   | 1414.                    | 6.6    | 55.1  |
|            | 2769          | 3/1             | 29        | 1.5  | 133.1                  | 63.1    | 30.1      | 19.0   | 1605.                    | 6.4    | 51.8  |
|            |               |                 | N         | 5    | 5                      | 5       | 5         | 5      | 5                        | 5      | 5     |
|            |               |                 | Mean      | 2.3  | 189.3                  | 64.1    | 30.1      | 19.3   | 1245.                    | 6.5    | 54.6  |
|            |               |                 | Sdev      | 0.89 | 66.54                  | 1.99    | 0.40      | 0.85   | 275.2                    | 0.13   | 2.07  |

R - RETICULOCYTES  
CHCM - MEAN HEMOGLOBIN CONC. RETIC.  
MPV - MEAN PLATELET VOLUME

RAB - RETICULOCYTES ABS  
CHr - CELLULAR HEMOGLOBIN RETIC.  
PDW - PLATELET DISTRIBUTION WIDTH

MCVr - MEAN CORPUSCULAR VOL. RETIC.  
PLT - PLATELETS



CONFIDENTIAL

Appendix 5  
Day 29 Hematology Data  
Test period

Session 1 (Scheduled)  
Fexinidazole

Study Number: 0504-2007

| M a l e s  |               |                 |           |      |                        |         |           |        |                          |        |       |
|------------|---------------|-----------------|-----------|------|------------------------|---------|-----------|--------|--------------------------|--------|-------|
| Dose Level | Animal Number | Group/ Subgroup | Study Day | R %  | RAB 10 <sup>9</sup> /L | MCVr fL | CHCM g/dL | CHr pg | PLT 10 <sup>3</sup> /mcL | MPV fL | PDW % |
| 800 mg/kg  |               |                 |           |      |                        |         |           |        |                          |        |       |
|            | 2780          | 4/1             | 29        | 2.6  | 212.2                  | 64.2    | 30.1      | 19.3   | 1279.                    | 6.6    | 56.2  |
|            | 2781          | 4/1             | 29        | 3.4  | 276.3                  | 64.2    | 30.2      | 19.4   | 1256.                    | 6.7    | 54.8  |
|            | 2782          | 4/1             | 29        | 2.7  | 242.3                  | 63.1    | 29.7      | 18.7   | 1227.                    | 6.2    | 55.3  |
|            | 2783          | 4/1             | 29        | 2.4  | 195.1                  | 64.0    | 29.8      | 19.1   | 1274.                    | 6.7    | 53.8  |
|            | 2784          | 4/1             | 29        | 3.0  | 241.3                  | 63.8    | 30.2      | 19.2   | 1465.                    | 6.7    | 54.4  |
|            |               |                 | N         | 5    | 5                      | 5       | 5         | 5      | 5                        | 5      | 5     |
|            |               |                 | Mean      | 2.8  | 233.4                  | 63.9    | 30.0      | 19.1   | 1300.                    | 6.6    | 54.9  |
|            |               |                 | Sdev      | 0.39 | 31.22                  | 0.46    | 0.23      | 0.27   | 94.3                     | 0.22   | 0.91  |

R - RETICULOCYTES

CHCM - MEAN HEMOGLOBIN CONC. RETIC.

MPV - MEAN PLATELET VOLUME

RAB - RETICULOCYTES ABS

CHr - CELLULAR HEMOGLOBIN RETIC.

PDW - PLATELET DISTRIBUTION WIDTH

MCVr - MEAN CORPUSCOLAR VOL. RETIC.

PLT - PLATELETS

CONFIDENTIAL

Appendix 5  
Day 29 Hematology Data  
Test period

Session 1 (Scheduled)  
Fexinidazole

Study Number: 0504-2007

| M a l e s  |               |                 |           |       |                          |                          |                           |                          |                          |                          |  |
|------------|---------------|-----------------|-----------|-------|--------------------------|--------------------------|---------------------------|--------------------------|--------------------------|--------------------------|--|
| Dose Level | Animal Number | Group/ Subgroup | Study Day | PCT % | WBC 10 <sup>3</sup> /mcL | NAB 10 <sup>3</sup> /mcL | LYAB 10 <sup>3</sup> /mcL | MAB 10 <sup>3</sup> /mcL | EAB 10 <sup>3</sup> /mcL | BAB 10 <sup>3</sup> /mcL |  |
| vehicle    |               |                 |           |       |                          |                          |                           |                          |                          |                          |  |
|            | 2745          | 1/1             | 29        | 0.91  | 11.00                    | 1.66                     | 8.81                      | 0.30                     | 0.08                     | 0.03                     |  |
|            | 2746          | 1/1             | 29        | 0.80  | 9.56                     | 1.60                     | 7.46                      | 0.22                     | 0.10                     | 0.02                     |  |
|            | 2747          | 1/1             | 29        | 0.82  | 10.20                    | 1.66                     | 7.94                      | 0.34                     | 0.09                     | 0.03                     |  |
|            | 2748          | 1/1             | 29        | 0.74  | 13.35                    | 2.46                     | 10.04                     | 0.57                     | 0.11                     | 0.04                     |  |
|            | 2749          | 1/1             | 29        | 0.86  | 11.83                    | 1.51                     | 9.92                      | 0.16                     | 0.10                     | 0.02                     |  |
|            |               |                 | N         | 5     | 5                        | 5                        | 5                         | 5                        | 5                        | 5                        |  |
|            |               |                 | Mean      | 0.83  | 11.19                    | 1.78                     | 8.83                      | 0.32                     | 0.10                     | 0.03                     |  |
|            |               |                 | Sdev      | 0.064 | 1.479                    | 0.386                    | 1.153                     | 0.157                    | 0.011                    | 0.008                    |  |
| 50 mg/kg   |               |                 |           |       |                          |                          |                           |                          |                          |                          |  |
|            | 2755          | 2/1             | 29        | 1.14  | 13.13                    | 2.07                     | 10.31                     | 0.37                     | 0.12                     | 0.04                     |  |
|            | 2756          | 2/1             | 29        | 0.81  | 9.28                     | 2.09                     | 6.56                      | 0.30                     | 0.16                     | 0.03                     |  |
|            | 2757          | 2/1             | 29        | 1.06  | 11.31                    | 1.75                     | 8.88                      | 0.31                     | 0.14                     | 0.03                     |  |
|            | 2758          | 2/1             | 29        | 0.86  | 12.04                    | 1.99                     | 9.35                      | 0.37                     | 0.09                     | 0.03                     |  |
|            | 2759          | 2/1             | 29        | 0.86  | 13.97                    | 2.52                     | 10.88                     | 0.24                     | 0.12                     | 0.04                     |  |
|            |               |                 | N         | 5     | 5                        | 5                        | 5                         | 5                        | 5                        | 5                        |  |
|            |               |                 | Mean      | 0.95  | 11.95                    | 2.08                     | 9.20                      | 0.32                     | 0.13                     | 0.03                     |  |
|            |               |                 | Sdev      | 0.145 | 1.804                    | 0.279                    | 1.670                     | 0.054                    | 0.026                    | 0.005                    |  |
| 200 mg/kg  |               |                 |           |       |                          |                          |                           |                          |                          |                          |  |
|            | 2765          | 3/1             | 29        | 0.80  | 14.17                    | 2.11                     | 11.43                     | 0.30                     | 0.15                     | 0.03                     |  |
|            | 2766          | 3/1             | 29        | 0.65  | 10.11                    | 2.17                     | 7.36                      | 0.30                     | 0.12                     | 0.01                     |  |
|            | 2767          | 3/1             | 29        | 0.65  | 15.63                    | 1.88                     | 13.05                     | 0.31                     | 0.17                     | 0.04                     |  |
|            | 2768          | 3/1             | 29        | 0.93  | 10.53                    | 1.98                     | 7.90                      | 0.29                     | 0.13                     | 0.02                     |  |
|            | 2769          | 3/1             | 29        | 1.03  | 9.53                     | 1.47                     | 7.56                      | 0.30                     | 0.10                     | 0.02                     |  |
|            |               |                 | N         | 5     | 5                        | 5                        | 5                         | 5                        | 5                        | 5                        |  |
|            |               |                 | Mean      | 0.81  | 11.99                    | 1.92                     | 9.46                      | 0.30                     | 0.13                     | 0.02                     |  |
|            |               |                 | Sdev      | 0.169 | 2.726                    | 0.277                    | 2.609                     | 0.007                    | 0.027                    | 0.011                    |  |

PCT - PLATELET HEMATOCRIT  
LYAB - LYMPHOCYTES ABS  
BAB - BASOPHILS ABS

WBC - WHITE BLOOD CELLS  
MAB - MONOCYTES ABS

NAB - NEUTROPHILS ABS  
EAB - EOSINOPHILS ABS

CONFIDENTIAL

Appendix 5  
Day 29 Hematology Data  
Test period

Session 1 (Scheduled)  
Fexinidazole

Study Number: 0504-2007

| M a l e s  |               |                 |           |       |                          |                          |                           |                          |                          |                          |
|------------|---------------|-----------------|-----------|-------|--------------------------|--------------------------|---------------------------|--------------------------|--------------------------|--------------------------|
| Dose Level | Animal Number | Group/ Subgroup | Study Day | PCT % | WBC 10 <sup>3</sup> /mcL | NAB 10 <sup>3</sup> /mcL | LYAB 10 <sup>3</sup> /mcL | MAB 10 <sup>3</sup> /mcL | EAB 10 <sup>3</sup> /mcL | BAB 10 <sup>3</sup> /mcL |
| 800 mg/kg  |               |                 |           |       |                          |                          |                           |                          |                          |                          |
|            | 2780          | 4/1             | 29        | 0.84  | 8.92                     | 1.22                     | 7.15                      | 0.27                     | 0.10                     | 0.02                     |
|            | 2781          | 4/1             | 29        | 0.84  | 12.87                    | 2.45                     | 9.78                      | 0.28                     | 0.21                     | 0.04                     |
|            | 2782          | 4/1             | 29        | 0.76  | 7.82                     | 1.55                     | 5.82                      | 0.28                     | 0.06                     | 0.01                     |
|            | 2783          | 4/1             | 29        | 0.86  | 10.23                    | 1.35                     | 8.29                      | 0.27                     | 0.13                     | 0.02                     |
|            | 2784          | 4/1             | 29        | 0.98  | 11.43                    | 2.60                     | 8.27                      | 0.32                     | 0.11                     | 0.02                     |
|            |               |                 | N         | 5     | 5                        | 5                        | 5                         | 5                        | 5                        | 5                        |
|            |               |                 | Mean      | 0.86  | 10.25                    | 1.83                     | 7.86                      | 0.28                     | 0.12                     | 0.02                     |
|            |               |                 | Sdev      | 0.079 | 1.996                    | 0.644                    | 1.475                     | 0.021                    | 0.055                    | 0.011                    |

PCT - PLATELET HEMATOCRIT  
LYAB - LYMPHOCYTES ABS  
BAB - BASOPHILS ABS

WBC - WHITE BLOOD CELLS  
MAB - MONOCYTES ABS

NAB - NEUTROPHILS ABS  
EAB - EOSINOPHILS ABS

CONFIDENTIAL

Appendix 5  
Day 29 Hematology Data  
Test period

Session 1 (Scheduled)  
Fexinidazole

Study Number: 0504-2007

| M a l e s  |               |                 |           |                           |      |      |      |      |      |      |
|------------|---------------|-----------------|-----------|---------------------------|------|------|------|------|------|------|
| Dose Level | Animal Number | Group/ Subgroup | Study Day | LUAB 10 <sup>3</sup> /mcL | N %  | LY % | M %  | E %  | B %  | LU % |
| vehicle    |               |                 |           |                           |      |      |      |      |      |      |
|            | 2745          | 1/1             | 29        | 0.11                      | 15.1 | 80.1 | 2.7  | 0.7  | 0.3  | 1.0  |
|            | 2746          | 1/1             | 29        | 0.17                      | 16.7 | 78.0 | 2.3  | 1.0  | 0.2  | 1.8  |
|            | 2747          | 1/1             | 29        | 0.14                      | 16.2 | 77.8 | 3.4  | 0.9  | 0.3  | 1.4  |
|            | 2748          | 1/1             | 29        | 0.14                      | 18.4 | 75.2 | 4.3  | 0.8  | 0.3  | 1.0  |
|            | 2749          | 1/1             | 29        | 0.12                      | 12.7 | 83.9 | 1.3  | 0.8  | 0.2  | 1.0  |
|            |               |                 | N         | 5                         | 5    | 5    | 5    | 5    | 5    | 5    |
|            |               |                 | Mean      | 0.14                      | 15.8 | 79.0 | 2.8  | 0.8  | 0.3  | 1.2  |
|            |               |                 | Sdev      | 0.023                     | 2.11 | 3.24 | 1.13 | 0.11 | 0.05 | 0.36 |
| 50 mg/kg   |               |                 |           |                           |      |      |      |      |      |      |
|            | 2755          | 2/1             | 29        | 0.22                      | 15.8 | 78.5 | 2.8  | 0.9  | 0.3  | 1.7  |
|            | 2756          | 2/1             | 29        | 0.15                      | 22.5 | 70.7 | 3.2  | 1.7  | 0.3  | 1.6  |
|            | 2757          | 2/1             | 29        | 0.21                      | 15.5 | 78.5 | 2.7  | 1.3  | 0.2  | 1.8  |
|            | 2758          | 2/1             | 29        | 0.21                      | 16.5 | 77.7 | 3.1  | 0.7  | 0.2  | 1.7  |
|            | 2759          | 2/1             | 29        | 0.17                      | 18.0 | 77.8 | 1.7  | 0.9  | 0.3  | 1.2  |
|            |               |                 | N         | 5                         | 5    | 5    | 5    | 5    | 5    | 5    |
|            |               |                 | Mean      | 0.19                      | 17.7 | 76.6 | 2.7  | 1.1  | 0.3  | 1.6  |
|            |               |                 | Sdev      | 0.030                     | 2.87 | 3.34 | 0.60 | 0.40 | 0.05 | 0.23 |
| 200 mg/kg  |               |                 |           |                           |      |      |      |      |      |      |
|            | 2765          | 3/1             | 29        | 0.16                      | 14.9 | 80.6 | 2.1  | 1.1  | 0.2  | 1.1  |
|            | 2766          | 3/1             | 29        | 0.15                      | 21.4 | 72.8 | 3.0  | 1.2  | 0.1  | 1.5  |
|            | 2767          | 3/1             | 29        | 0.18                      | 12.0 | 83.5 | 2.0  | 1.1  | 0.2  | 1.2  |
|            | 2768          | 3/1             | 29        | 0.21                      | 18.8 | 75.0 | 2.7  | 1.2  | 0.2  | 2.0  |
|            | 2769          | 3/1             | 29        | 0.08                      | 15.4 | 79.3 | 3.1  | 1.0  | 0.2  | 0.9  |
|            |               |                 | N         | 5                         | 5    | 5    | 5    | 5    | 5    | 5    |
|            |               |                 | Mean      | 0.16                      | 16.5 | 78.2 | 2.6  | 1.1  | 0.2  | 1.3  |
|            |               |                 | Sdev      | 0.048                     | 3.65 | 4.31 | 0.51 | 0.08 | 0.04 | 0.43 |

LUAB - LARGE UNSTAINED CELLS ABS  
M - MONOCYTES %  
LU - LARGE UNSTAINED CELLS %

N - NEUTROPHILS %  
E - EOSINOPHILS %

LY - LYMPHOCITES %  
B - BASOPHILS %

CONFIDENTIAL

Appendix 5  
Day 29 Hematology Data  
Test period

Session 1 (Scheduled)  
Fexinidazole

Study Number: 0504-2007

| M a l e s  |               |                 |           |                           |      |      |      |      |      |      |
|------------|---------------|-----------------|-----------|---------------------------|------|------|------|------|------|------|
| Dose Level | Animal Number | Group/ Subgroup | Study Day | LUAB 10 <sup>3</sup> /mCL | N %  | LY % | M %  | E %  | B %  | LU % |
| 800 mg/kg  |               |                 |           |                           |      |      |      |      |      |      |
|            | 2780          | 4/1             | 29        | 0.15                      | 13.7 | 80.2 | 3.0  | 1.1  | 0.2  | 1.7  |
|            | 2781          | 4/1             | 29        | 0.12                      | 19.0 | 76.0 | 2.1  | 1.6  | 0.3  | 0.9  |
|            | 2782          | 4/1             | 29        | 0.10                      | 19.8 | 74.4 | 3.6  | 0.8  | 0.2  | 1.3  |
|            | 2783          | 4/1             | 29        | 0.17                      | 13.2 | 81.1 | 2.6  | 1.2  | 0.2  | 1.7  |
|            | 2784          | 4/1             | 29        | 0.10                      | 22.8 | 72.4 | 2.8  | 0.9  | 0.2  | 0.9  |
|            |               |                 | N         | 5                         | 5    | 5    | 5    | 5    | 5    | 5    |
|            |               |                 | Mean      | 0.13                      | 17.7 | 76.8 | 2.8  | 1.1  | 0.2  | 1.3  |
|            |               |                 | Sdev      | 0.031                     | 4.13 | 3.74 | 0.55 | 0.31 | 0.04 | 0.40 |

LUAB - LARGE UNSTAINED CELLS ABS  
M - MONOCYTES %  
LU - LARGE UNSTAINED CELLS %

N - NEUTROPHILS %  
E - EOSINOPHILS %

LY - LYMPHOCITES %  
B - BASOPHILS %

CONFIDENTIAL

Appendix 5  
Day 29 Hematology Data  
Test period

Session 1 (Scheduled)  
Fexinidazole

Study Number: 0504-2007

| F e m a l e s |               |                 |           |                          |          |       |        |        |           |       |          |
|---------------|---------------|-----------------|-----------|--------------------------|----------|-------|--------|--------|-----------|-------|----------|
| Dose Level    | Animal Number | Group/ Subgroup | Study Day | RBC 10 <sup>6</sup> /mcL | HGB g/dL | HCT % | MCV fL | MCH pg | MCHC g/dL | RDW % | HDW g/dL |
| vehicle       |               |                 |           |                          |          |       |        |        |           |       |          |
|               | 2795          | 1/1             | 29        | 8.34                     | 14.4     | 42.6  | 51.0   | 17.3   | 33.8      | 10.4  | 2.19     |
|               | 2796          | 1/1             | 29        | 8.55                     | 15.7     | 45.9  | 53.7   | 18.3   | 34.2      | 10.5  | 2.36     |
|               | 2797          | 1/1             | 29        | 8.10                     | 15.3     | 44.5  | 55.0   | 18.8   | 34.3      | 10.3  | 2.10     |
|               | 2798          | 1/1             | 29        | 8.65                     | 15.7     | 46.2  | 53.4   | 18.1   | 33.9      | 10.1  | 2.45     |
|               | 2799          | 1/1             | 29        | 7.84                     | 14.5     | 41.8  | 53.3   | 18.5   | 34.7      | 10.7  | 2.41     |
|               |               |                 | N         | 5                        | 5        | 5     | 5      | 5      | 5         | 5     | 5        |
|               |               |                 | Mean      | 8.30                     | 15.1     | 44.2  | 53.3   | 18.2   | 34.2      | 10.4  | 2.30     |
|               |               |                 | Sdev      | 0.331                    | 0.63     | 1.96  | 1.44   | 0.57   | 0.36      | 0.22  | 0.150    |
| 50 mg/kg      |               |                 |           |                          |          |       |        |        |           |       |          |
|               | 2805          | 2/1             | 29        | 7.91                     | 14.2     | 42.3  | 53.5   | 18.0   | 33.7      | 11.2  | 2.68     |
|               | 2806          | 2/1             | 29        | 8.28                     | 15.5     | 45.3  | 54.7   | 18.7   | 34.2      | 10.2  | 2.51     |
|               | 2807          | 2/1             | 29        | 8.34                     | 14.9     | 44.2  | 53.0   | 17.9   | 33.8      | 10.8  | 2.42     |
|               | 2808          | 2/1             | 29        | 7.99                     | 14.9     | 44.3  | 55.4   | 18.6   | 33.6      | 10.6  | 2.32     |
|               | 2809          | 2/1             | 29        | 8.02                     | 14.8     | 44.6  | 55.7   | 18.5   | 33.2      | 10.4  | 2.32     |
|               |               |                 | N         | 5                        | 5        | 5     | 5      | 5      | 5         | 5     | 5        |
|               |               |                 | Mean      | 8.11                     | 14.9     | 44.1  | 54.5   | 18.3   | 33.7      | 10.6  | 2.45     |
|               |               |                 | Sdev      | 0.190                    | 0.46     | 1.11  | 1.18   | 0.36   | 0.36      | 0.38  | 0.151    |
| 200 mg/kg     |               |                 |           |                          |          |       |        |        |           |       |          |
|               | 2815          | 3/1             | 29        | 8.12                     | 15.2     | 44.6  | 55.0   | 18.7   | 34.0      | 10.8  | 2.68     |
|               | 2816          | 3/1             | 29        | 8.16                     | 15.1     | 43.8  | 53.7   | 18.5   | 34.4      | 11.3  | 2.55     |
|               | 2817          | 3/1             | 29        | 8.05                     | 14.5     | 44.1  | 54.8   | 18.0   | 32.9      | 10.7  | 2.47     |
|               | 2818          | 3/1             | 29        | 7.98                     | 13.9     | 41.7  | 52.2   | 17.4   | 33.3      | 12.0  | 2.61     |
|               | 2819          | 3/1             | 29        | 8.23                     | 14.8     | 44.3  | 53.8   | 17.9   | 33.4      | 10.9  | 2.48     |
|               |               |                 | N         | 5                        | 5        | 5     | 5      | 5      | 5         | 5     | 5        |
|               |               |                 | Mean      | 8.11                     | 14.7     | 43.7  | 53.9   | 18.1   | 33.6      | 11.1  | 2.56     |
|               |               |                 | Sdev      | 0.097                    | 0.52     | 1.16  | 1.11   | 0.51   | 0.60      | 0.53  | 0.089    |

RBC - RED BLOOD CELLS  
MCV - MEAN CORPUSCULAR VOLUME  
RDW - RED CELL DISTRIBUTION WIDTH

HGB - HEMOGLOBIN  
MCH - MEAN CORPUSCULAR HEMOGLOBIN  
HDW - HEMOGLOBIN DISTRIB. WIDTH

HCT - HEMATOCRIT  
MCHC - MEAN CORPUSCULAR HGB CONC.

CONFIDENTIAL

Appendix 5  
Day 29 Hematology Data  
Test period

Session 1 (Scheduled)  
Fexinidazole

Study Number: 0504-2007

| F e m a l e s |               |                 |           |                          |          |       |        |        |           |       |          |
|---------------|---------------|-----------------|-----------|--------------------------|----------|-------|--------|--------|-----------|-------|----------|
| Dose Level    | Animal Number | Group/ Subgroup | Study Day | RBC 10 <sup>6</sup> /mcL | HGB g/dL | HCT % | MCV fL | MCH pg | MCHC g/dL | RDW % | HDW g/dL |
| 800 mg/kg     |               |                 |           |                          |          |       |        |        |           |       |          |
|               | 2830          | 4/1             | 29        | 7.72                     | 13.4     | 40.3  | 52.2   | 17.3   | 33.3      | 10.8  | 2.53     |
|               | 2831          | 4/1             | 29        | 7.87                     | 13.6     | 41.0  | 52.1   | 17.3   | 33.3      | 10.6  | 2.33     |
|               | 2832          | 4/1             | 29        | 7.69                     | 13.9     | 40.7  | 52.9   | 18.1   | 34.2      | 11.3  | 2.73     |
|               | 2833          | 4/1             | 29        | 8.49                     | 14.7     | 44.3  | 52.2   | 17.3   | 33.3      | 11.5  | 2.69     |
|               | 2834          | 4/1             | 29        | 7.83                     | 14.1     | 42.8  | 54.6   | 17.9   | 32.8      | 10.3  | 2.38     |
|               |               |                 | N         | 5                        | 5        | 5     | 5      | 5      | 5         | 5     | 5        |
|               |               |                 | Mean      | 7.92                     | 13.9     | 41.8  | 52.8   | 17.6   | 33.4      | 10.9  | 2.53     |
|               |               |                 | Sdev      | 0.327                    | 0.50     | 1.68  | 1.06   | 0.39   | 0.51      | 0.49  | 0.179    |

RBC - RED BLOOD CELLS

MCV - MEAN CORPUSCULAR VOLUME

RDW - RED CELL DISTRIBUTION WIDTH

HGB - HEMOGLOBIN

MCH - MEAN CORPUSCULAR HEMOGLOBIN

HDW - HEMOGLOBIN DISTRIB. WIDTH

HCT - HEMATOCRIT

MCHC - MEAN CORPUSCULAR HGB CONC.

CONFIDENTIAL

Appendix 5  
Day 29 Hematology Data  
Test period

Session 1 (Scheduled)  
Fexinidazole

Study Number: 0504-2007

| F e m a l e s |               |                 |           |      |                        |         |           |        |                          |        |       |
|---------------|---------------|-----------------|-----------|------|------------------------|---------|-----------|--------|--------------------------|--------|-------|
| Dose Level    | Animal Number | Group/ Subgroup | Study Day | R %  | RAB 10 <sup>9</sup> /L | MCVr fL | CHCM g/dL | CHr pg | PLT 10 <sup>3</sup> /mcL | MPV fL | PDW % |
| vehicle       |               |                 |           |      |                        |         |           |        |                          |        |       |
|               | 2795          | 1/1             | 29        | 2.0  | 168.5                  | 58.4    | 31.2      | 18.2   | 1173.                    | 5.7    | 53.3  |
|               | 2796          | 1/1             | 29        | 2.2  | 189.8                  | 61.6    | 31.9      | 19.6   | 1224.                    | 6.0    | 56.6  |
|               | 2797          | 1/1             | 29        | 2.3  | 184.9                  | 61.9    | 32.1      | 19.9   | 1284.                    | 5.8    | 53.6  |
|               | 2798          | 1/1             | 29        | 1.6  | 133.8                  | 61.7    | 31.7      | 19.5   | 1522.                    | 5.8    | 52.3  |
|               | 2799          | 1/1             | 29        | 2.8  | 220.1                  | 62.6    | 31.3      | 19.5   | 1294.                    | 5.7    | 50.4  |
|               |               |                 | N         | 5    | 5                      | 5       | 5         | 5      | 5                        | 5      | 5     |
|               |               |                 | Mean      | 2.2  | 179.4                  | 61.2    | 31.6      | 19.3   | 1299.                    | 5.8    | 53.2  |
|               |               |                 | Sdev      | 0.46 | 31.60                  | 1.63    | 0.38      | 0.66   | 133.7                    | 0.12   | 2.26  |
| 50 mg/kg      |               |                 |           |      |                        |         |           |        |                          |        |       |
|               | 2805          | 2/1             | 29        | 3.7  | 290.1                  | 63.8    | 31.6      | 20.2   | 1212.                    | 5.8    | 54.5  |
|               | 2806          | 2/1             | 29        | 1.8  | 150.6                  | 64.5    | 31.5      | 20.2   | 1076.                    | 6.0    | 49.3  |
|               | 2807          | 2/1             | 29        | 2.2  | 184.8                  | 62.0    | 31.0      | 19.2   | 1038.                    | 6.2    | 54.9  |
|               | 2808          | 2/1             | 29        | 2.1  | 165.1                  | 63.6    | 31.8      | 20.2   | 1207.                    | 5.8    | 51.7  |
|               | 2809          | 2/1             | 29        | 2.8  | 220.5                  | 64.5    | 31.2      | 20.1   | 1008.                    | 6.0    | 53.2  |
|               |               |                 | N         | 5    | 5                      | 5       | 5         | 5      | 5                        | 5      | 5     |
|               |               |                 | Mean      | 2.5  | 202.2                  | 63.7    | 31.4      | 20.0   | 1108.                    | 6.0    | 52.7  |
|               |               |                 | Sdev      | 0.74 | 55.68                  | 1.02    | 0.32      | 0.44   | 95.6                     | 0.17   | 2.29  |
| 200 mg/kg     |               |                 |           |      |                        |         |           |        |                          |        |       |
|               | 2815          | 3/1             | 29        | 2.5  | 199.8                  | 63.5    | 31.6      | 20.0   | 1085.                    | 5.7    | 50.7  |
|               | 2816          | 3/1             | 29        | 2.6  | 213.4                  | 63.5    | 31.8      | 20.1   | 1140.                    | 6.6    | 57.3  |
|               | 2817          | 3/1             | 29        | 1.7  | 135.4                  | 62.9    | 31.6      | 19.8   | 1556.                    | 6.1    | 53.5  |
|               | 2818          | 3/1             | 29        | 3.1  | 250.6                  | 62.7    | 30.6      | 19.1   | 1381.                    | 6.3    | 52.9  |
|               | 2819          | 3/1             | 29        | 1.8  | 150.5                  | 62.8    | 31.7      | 19.8   | 1100.                    | 5.7    | 52.4  |
|               |               |                 | N         | 5    | 5                      | 5       | 5         | 5      | 5                        | 5      | 5     |
|               |               |                 | Mean      | 2.3  | 189.9                  | 63.1    | 31.5      | 19.8   | 1252.                    | 6.1    | 53.4  |
|               |               |                 | Sdev      | 0.60 | 47.06                  | 0.39    | 0.49      | 0.39   | 207.7                    | 0.39   | 2.44  |

R - RETICULOCYTES  
CHCM - MEAN HEMOGLOBIN CONC. RETIC.  
MPV - MEAN PLATELET VOLUME

RAB - RETICULOCYTES ABS  
CHr - CELLULAR HEMOGLOBIN RETIC.  
PDW - PLATELET DISTRIBUTION WIDTH

MCVr - MEAN CORPUSCULAR VOL. RETIC.  
PLT - PLATELETS



CONFIDENTIAL

Appendix 5  
Day 29 Hematology Data  
Test period

Session 1 (Scheduled)  
Fexinidazole

Study Number: 0504-2007

| F e m a l e s |               |                 |           |      |                        |         |           |        |                          |        |       |
|---------------|---------------|-----------------|-----------|------|------------------------|---------|-----------|--------|--------------------------|--------|-------|
| Dose Level    | Animal Number | Group/ Subgroup | Study Day | R %  | RAB 10 <sup>9</sup> /L | MCVr fL | CHCM g/dL | CHr pg | PLT 10 <sup>3</sup> /mcL | MPV fL | PDW % |
| 800 mg/kg     |               |                 |           |      |                        |         |           |        |                          |        |       |
|               | 2830          | 4/1             | 29        | 3.1  | 239.0                  | 63.3    | 30.4      | 19.2   | 1136.                    | 5.8    | 53.2  |
|               | 2831          | 4/1             | 29        | 3.1  | 243.2                  | 60.8    | 30.6      | 18.6   | 1376.                    | 6.1    | 53.4  |
|               | 2832          | 4/1             | 29        | 2.5  | 192.3                  | 61.3    | 30.7      | 18.7   | 1216.                    | 5.9    | 52.9  |
|               | 2833          | 4/1             | 29        | 2.6  | 221.2                  | 61.2    | 30.7      | 18.8   | 1270.                    | 6.1    | 55.6  |
|               | 2834          | 4/1             | 29        | 2.5  | 194.9                  | 63.3    | 30.6      | 19.4   | 1294.                    | 5.9    | 50.4  |
|               |               |                 | N         | 5    | 5                      | 5       | 5         | 5      | 5                        | 5      | 5     |
|               |               |                 | Mean      | 2.8  | 218.1                  | 62.0    | 30.6      | 18.9   | 1258.                    | 6.0    | 53.1  |
|               |               |                 | Sdev      | 0.31 | 23.88                  | 1.22    | 0.12      | 0.34   | 89.5                     | 0.13   | 1.85  |

R - RETICULOCYTES

CHCM - MEAN HEMOGLOBIN CONC. RETIC.

MPV - MEAN PLATELET VOLUME

RAB - RETICULOCYTES ABS

CHr - CELLULAR HEMOGLOBIN RETIC.

PDW - PLATELET DISTRIBUTION WIDTH

MCVr - MEAN CORPUSCOLAR VOL. RETIC.

PLT - PLATELETS

CONFIDENTIAL

Appendix 5  
Day 29 Hematology Data  
Test period

Session 1 (Scheduled)  
Fexinidazole

Study Number: 0504-2007

| F e m a l e s |               |                 |           |       |                          |                          |                           |                          |                          |                          |  |
|---------------|---------------|-----------------|-----------|-------|--------------------------|--------------------------|---------------------------|--------------------------|--------------------------|--------------------------|--|
| Dose Level    | Animal Number | Group/ Subgroup | Study Day | PCT % | WBC 10 <sup>3</sup> /mcL | NAB 10 <sup>3</sup> /mcL | LYAB 10 <sup>3</sup> /mcL | MAB 10 <sup>3</sup> /mcL | EAB 10 <sup>3</sup> /mcL | BAB 10 <sup>3</sup> /mcL |  |
| vehicle       |               |                 |           |       |                          |                          |                           |                          |                          |                          |  |
|               | 2795          | 1/1             | 29        | 0.67  | 13.03                    | 2.40                     | 9.86                      | 0.36                     | 0.18                     | 0.03                     |  |
|               | 2796          | 1/1             | 29        | 0.73  | 8.28                     | 1.28                     | 6.45                      | 0.27                     | 0.17                     | 0.03                     |  |
|               | 2797          | 1/1             | 29        | 0.74  | 7.55                     | 0.98                     | 6.12                      | 0.23                     | 0.11                     | 0.03                     |  |
|               | 2798          | 1/1             | 29        | 0.89  | 13.60                    | 3.15                     | 9.74                      | 0.41                     | 0.16                     | 0.03                     |  |
|               | 2799          | 1/1             | 29        | 0.74  | 11.87                    | 1.83                     | 9.56                      | 0.18                     | 0.16                     | 0.03                     |  |
|               |               |                 | N         | 5     | 5                        | 5                        | 5                         | 5                        | 5                        | 5                        |  |
|               |               |                 | Mean      | 0.75  | 10.87                    | 1.93                     | 8.35                      | 0.29                     | 0.16                     | 0.03                     |  |
|               |               |                 | Sdev      | 0.081 | 2.777                    | 0.872                    | 1.888                     | 0.094                    | 0.027                    | 0.000                    |  |
| 50 mg/kg      |               |                 |           |       |                          |                          |                           |                          |                          |                          |  |
|               | 2805          | 2/1             | 29        | 0.71  | 7.60                     | 0.74                     | 6.35                      | 0.24                     | 0.17                     | 0.01                     |  |
|               | 2806          | 2/1             | 29        | 0.65  | 12.82                    | 1.81                     | 10.34                     | 0.25                     | 0.21                     | 0.02                     |  |
|               | 2807          | 2/1             | 29        | 0.64  | 7.05                     | 2.38                     | 4.24                      | 0.28                     | 0.07                     | 0.01                     |  |
|               | 2808          | 2/1             | 29        | 0.70  | 9.64                     | 1.92                     | 7.03                      | 0.37                     | 0.23                     | 0.02                     |  |
|               | 2809          | 2/1             | 29        | 0.61  | 10.46                    | 1.67                     | 8.10                      | 0.37                     | 0.17                     | 0.02                     |  |
|               |               |                 | N         | 5     | 5                        | 5                        | 5                         | 5                        | 5                        | 5                        |  |
|               |               |                 | Mean      | 0.66  | 9.51                     | 1.70                     | 7.21                      | 0.30                     | 0.17                     | 0.02                     |  |
|               |               |                 | Sdev      | 0.042 | 2.322                    | 0.601                    | 2.246                     | 0.064                    | 0.062                    | 0.005                    |  |
| 200 mg/kg     |               |                 |           |       |                          |                          |                           |                          |                          |                          |  |
|               | 2815          | 3/1             | 29        | 0.62  | 10.53                    | 0.45                     | 9.40                      | 0.30                     | 0.13                     | 0.03                     |  |
|               | 2816          | 3/1             | 29        | 0.76  | 9.87                     | 1.95                     | 7.40                      | 0.26                     | 0.11                     | 0.03                     |  |
|               | 2817          | 3/1             | 29        | 0.95  | 14.88                    | 2.86                     | 11.32                     | 0.33                     | 0.13                     | 0.03                     |  |
|               | 2818          | 3/1             | 29        | 0.87  | 8.72                     | 1.23                     | 7.04                      | 0.24                     | 0.10                     | 0.01                     |  |
|               | 2819          | 3/1             | 29        | 0.63  | 7.14                     | 1.28                     | 5.43                      | 0.25                     | 0.08                     | 0.01                     |  |
|               |               |                 | N         | 5     | 5                        | 5                        | 5                         | 5                        | 5                        | 5                        |  |
|               |               |                 | Mean      | 0.77  | 10.23                    | 1.55                     | 8.12                      | 0.28                     | 0.11                     | 0.02                     |  |
|               |               |                 | Sdev      | 0.145 | 2.901                    | 0.903                    | 2.280                     | 0.038                    | 0.021                    | 0.011                    |  |

PCT - PLATELET HEMATOCRIT  
LYAB - LYMPHOCYTES ABS  
BAB - BASOPHILS ABS

WBC - WHITE BLOOD CELLS  
MAB - MONOCYTES ABS

NAB - NEUTROPHILS ABS  
EAB - EOSINOPHILS ABS

CONFIDENTIAL

Appendix 5  
Day 29 Hematology Data  
Test period

Session 1 (Scheduled)  
Fexinidazole

Study Number: 0504-2007

| F e m a l e s |               |                 |           |       |                          |                          |                           |                          |                          |                          |
|---------------|---------------|-----------------|-----------|-------|--------------------------|--------------------------|---------------------------|--------------------------|--------------------------|--------------------------|
| Dose Level    | Animal Number | Group/ Subgroup | Study Day | PCT % | WBC 10 <sup>3</sup> /mcL | NAB 10 <sup>3</sup> /mcL | LYAB 10 <sup>3</sup> /mcL | MAB 10 <sup>3</sup> /mcL | EAB 10 <sup>3</sup> /mcL | BAB 10 <sup>3</sup> /mcL |
| 800 mg/kg     |               |                 |           |       |                          |                          |                           |                          |                          |                          |
|               | 2830          | 4/1             | 29        | 0.66  | 9.45                     | 1.09                     | 7.90                      | 0.19                     | 0.12                     | 0.03                     |
|               | 2831          | 4/1             | 29        | 0.84  | 9.86                     | 1.06                     | 8.29                      | 0.25                     | 0.10                     | 0.03                     |
|               | 2832          | 4/1             | 29        | 0.71  | 11.24                    | 0.58                     | 10.03                     | 0.38                     | 0.13                     | 0.02                     |
|               | 2833          | 4/1             | 29        | 0.77  | 9.76                     | 1.22                     | 8.13                      | 0.20                     | 0.09                     | 0.03                     |
|               | 2834          | 4/1             | 29        | 0.77  | 14.57                    | 1.18                     | 12.80                     | 0.29                     | 0.05                     | 0.03                     |
|               |               |                 | N         | 5     | 5                        | 5                        | 5                         | 5                        | 5                        | 5                        |
|               |               |                 | Mean      | 0.75  | 10.98                    | 1.03                     | 9.43                      | 0.26                     | 0.10                     | 0.03                     |
|               |               |                 | Sdev      | 0.068 | 2.124                    | 0.258                    | 2.064                     | 0.077                    | 0.031                    | 0.004                    |

PCT - PLATELET HEMATOCRIT  
LYAB - LYMPHOCYTES ABS  
BAB - BASOPHILS ABS

WBC - WHITE BLOOD CELLS  
MAB - MONOCYTES ABS

NAB - NEUTROPHILS ABS  
EAB - EOSINOPHILS ABS

CONFIDENTIAL

Appendix 5  
Day 29 Hematology Data  
Test period

Session 1 (Scheduled)  
Fexinidazole

Study Number: 0504-2007

| F e m a l e s |               |                 |           |                           |      |      |      |      |      |      |
|---------------|---------------|-----------------|-----------|---------------------------|------|------|------|------|------|------|
| Dose Level    | Animal Number | Group/ Subgroup | Study Day | LUAB 10 <sup>3</sup> /mcL | N %  | LY % | M %  | E %  | B %  | LU % |
| vehicle       |               |                 |           |                           |      |      |      |      |      |      |
|               | 2795          | 1/1             | 29        | 0.19                      | 18.4 | 75.7 | 2.7  | 1.4  | 0.3  | 1.5  |
|               | 2796          | 1/1             | 29        | 0.09                      | 15.4 | 77.9 | 3.2  | 2.0  | 0.3  | 1.1  |
|               | 2797          | 1/1             | 29        | 0.08                      | 13.0 | 81.1 | 3.1  | 1.4  | 0.4  | 1.0  |
|               | 2798          | 1/1             | 29        | 0.11                      | 23.1 | 71.6 | 3.0  | 1.2  | 0.2  | 0.8  |
|               | 2799          | 1/1             | 29        | 0.11                      | 15.4 | 80.5 | 1.5  | 1.3  | 0.2  | 1.0  |
|               |               |                 | N         | 5                         | 5    | 5    | 5    | 5    | 5    | 5    |
|               |               |                 | Mean      | 0.12                      | 17.1 | 77.4 | 2.7  | 1.5  | 0.3  | 1.1  |
|               |               |                 | Sdev      | 0.043                     | 3.88 | 3.88 | 0.70 | 0.31 | 0.08 | 0.26 |
| 50 mg/kg      |               |                 |           |                           |      |      |      |      |      |      |
|               | 2805          | 2/1             | 29        | 0.09                      | 9.8  | 83.5 | 3.2  | 2.2  | 0.1  | 1.1  |
|               | 2806          | 2/1             | 29        | 0.18                      | 14.2 | 80.7 | 2.0  | 1.6  | 0.2  | 1.4  |
|               | 2807          | 2/1             | 29        | 0.06                      | 33.8 | 60.1 | 3.9  | 1.1  | 0.2  | 0.9  |
|               | 2808          | 2/1             | 29        | 0.08                      | 19.9 | 72.9 | 3.8  | 2.4  | 0.2  | 0.8  |
|               | 2809          | 2/1             | 29        | 0.12                      | 16.0 | 77.5 | 3.5  | 1.6  | 0.2  | 1.1  |
|               |               |                 | N         | 5                         | 5    | 5    | 5    | 5    | 5    | 5    |
|               |               |                 | Mean      | 0.11                      | 18.7 | 74.9 | 3.3  | 1.8  | 0.2  | 1.1  |
|               |               |                 | Sdev      | 0.047                     | 9.17 | 9.18 | 0.77 | 0.52 | 0.04 | 0.23 |
| 200 mg/kg     |               |                 |           |                           |      |      |      |      |      |      |
|               | 2815          | 3/1             | 29        | 0.21                      | 4.3  | 89.3 | 2.9  | 1.2  | 0.3  | 2.0  |
|               | 2816          | 3/1             | 29        | 0.12                      | 19.7 | 75.0 | 2.7  | 1.1  | 0.3  | 1.2  |
|               | 2817          | 3/1             | 29        | 0.22                      | 19.2 | 76.1 | 2.2  | 0.9  | 0.2  | 1.5  |
|               | 2818          | 3/1             | 29        | 0.10                      | 14.1 | 80.7 | 2.7  | 1.1  | 0.2  | 1.1  |
|               | 2819          | 3/1             | 29        | 0.08                      | 17.9 | 76.1 | 3.6  | 1.1  | 0.1  | 1.2  |
|               |               |                 | N         | 5                         | 5    | 5    | 5    | 5    | 5    | 5    |
|               |               |                 | Mean      | 0.15                      | 15.0 | 79.4 | 2.8  | 1.1  | 0.2  | 1.4  |
|               |               |                 | Sdev      | 0.065                     | 6.39 | 5.93 | 0.51 | 0.11 | 0.08 | 0.37 |

LUAB - LARGE UNSTAINED CELLS ABS  
M - MONOCYTES %  
LU - LARGE UNSTAINED CELLS %

N - NEUTROPHILS %  
E - EOSINOPHILS %

LY - LYMPHOCITES %  
B - BASOPHILS %

CONFIDENTIAL

Appendix 5  
Day 29 Hematology Data  
Test period

Session 1 (Scheduled)  
Fexinidazole

Study Number: 0504-2007

| F e m a l e s |               |                 |           |                           |      |      |      |      |      |      |
|---------------|---------------|-----------------|-----------|---------------------------|------|------|------|------|------|------|
| Dose Level    | Animal Number | Group/ Subgroup | Study Day | LUAB 10 <sup>3</sup> /mcL | N %  | LY % | M %  | E %  | B %  | LU % |
| 800 mg/kg     |               |                 |           |                           |      |      |      |      |      |      |
|               | 2830          | 4/1             | 29        | 0.12                      | 11.5 | 83.6 | 2.0  | 1.3  | 0.3  | 1.3  |
|               | 2831          | 4/1             | 29        | 0.14                      | 10.7 | 84.0 | 2.5  | 1.0  | 0.3  | 1.5  |
|               | 2832          | 4/1             | 29        | 0.10                      | 5.2  | 89.2 | 3.4  | 1.2  | 0.2  | 0.9  |
|               | 2833          | 4/1             | 29        | 0.10                      | 12.5 | 83.3 | 2.0  | 0.9  | 0.3  | 1.0  |
|               | 2834          | 4/1             | 29        | 0.23                      | 8.1  | 87.8 | 2.0  | 0.3  | 0.2  | 1.6  |
|               |               |                 | N         | 5                         | 5    | 5    | 5    | 5    | 5    | 5    |
|               |               |                 | Mean      | 0.14                      | 9.6  | 85.6 | 2.4  | 0.9  | 0.3  | 1.3  |
|               |               |                 | Sdev      | 0.054                     | 2.95 | 2.72 | 0.61 | 0.39 | 0.05 | 0.30 |

LUAB - LARGE UNSTAINED CELLS ABS  
M - MONOCYTES %  
LU - LARGE UNSTAINED CELLS %

N - NEUTROPHILS %  
E - EOSINOPHILS %

LY - LYMPHOCITES %  
B - BASOPHILS %

CONFIDENTIAL

Appendix 5  
Day 43 Hematology Data  
Test period

Session 1 (Scheduled)  
Fexinidazole

Study Number: 0504-2007

| M a l e s  |               |                 |           |                          |          |       |        |        |           |       |          |
|------------|---------------|-----------------|-----------|--------------------------|----------|-------|--------|--------|-----------|-------|----------|
| Dose Level | Animal Number | Group/ Subgroup | Study Day | RBC 10 <sup>6</sup> /mcL | HGB g/dL | HCT % | MCV fL | MCH pg | MCHC g/dL | RDW % | HDW g/dL |
| vehicle    |               |                 |           |                          |          |       |        |        |           |       |          |
|            | 2745          | 1/1             | 43        | 8.66                     | 15.6     | 46.8  | 54.1   | 18.0   | 33.2      | 11.0  | 2.65     |
|            | 2746          | 1/1             | 43        | 9.18                     | 15.2     | 47.1  | 51.2   | 16.5   | 32.3      | 11.7  | 2.60     |
|            | 2747          | 1/1             | 43        | 8.21                     | 15.1     | 45.8  | 55.8   | 18.4   | 32.9      | 12.0  | 2.85     |
|            | 2748          | 1/1             | 43        | 9.00                     | 15.9     | 47.6  | 52.9   | 17.7   | 33.4      | 12.0  | 2.65     |
|            | 2749          | 1/1             | 43        | 9.16                     | 16.4     | 48.6  | 53.1   | 17.9   | 33.8      | 11.8  | 2.62     |
|            |               |                 | N         | 5                        | 5        | 5     | 5      | 5      | 5         | 5     | 5        |
|            |               |                 | Mean      | 8.84                     | 15.6     | 47.2  | 53.4   | 17.7   | 33.1      | 11.7  | 2.67     |
|            |               |                 | Sdev      | 0.410                    | 0.53     | 1.03  | 1.69   | 0.72   | 0.56      | 0.41  | 0.101    |
| 800 mg/kg  |               |                 |           |                          |          |       |        |        |           |       |          |
|            | 2780          | 4/1             | 43        | 8.19                     | 15.3     | 45.8  | 55.9   | 18.6   | 33.3      | 11.5  | 2.74     |
|            | 2781          | 4/1             | 43        | 8.29                     | 15.7     | 46.8  | 56.4   | 19.0   | 33.6      | 12.2  | 2.98     |
|            | 2782          | 4/1             | 43        | 9.34                     | 16.6     | 51.7  | 55.4   | 17.8   | 32.2      | 11.6  | 2.87     |
|            | 2783          | 4/1             | 43        | 8.57                     | 15.1     | 47.2  | 55.1   | 17.6   | 32.0      | 12.4  | 2.75     |
|            | 2784          | 4/1             | 43        | 8.10                     | 15.3     | 45.7  | 56.4   | 18.8   | 33.4      | 12.5  | 2.66     |
|            |               |                 | N         | 5                        | 5        | 5     | 5      | 5      | 5         | 5     | 5        |
|            |               |                 | Mean      | 8.50                     | 15.6     | 47.4  | 55.8   | 18.4   | 32.9      | 12.0  | 2.80     |
|            |               |                 | Sdev      | 0.503                    | 0.60     | 2.47  | 0.59   | 0.62   | 0.74      | 0.46  | 0.125    |

RBC - RED BLOOD CELLS  
MCV - MEAN CORPUSCULAR VOLUME  
RDW - RED CELL DISTRIBUTION WIDTH

HGB - HEMOGLOBIN  
MCH - MEAN CORPUSCULAR HEMOGLOBIN  
HDW - HEMOGLOBIN DISTRIB. WIDTH

HCT - HEMATOCRIT  
MCHC - MEAN CORPUSCULAR HGB CONC.

CONFIDENTIAL

Appendix 5  
Day 43 Hematology Data  
Test period

Session 1 (Scheduled)  
Fexinidazole

Study Number: 0504-2007

| M a l e s  |               |                 |           |      |                        |         |           |        |                          |        |       |
|------------|---------------|-----------------|-----------|------|------------------------|---------|-----------|--------|--------------------------|--------|-------|
| Dose Level | Animal Number | Group/ Subgroup | Study Day | R %  | RAB 10 <sup>9</sup> /L | MCVr fL | CHCM g/dL | CHr pg | PLT 10 <sup>3</sup> /mcL | MPV fL | PDW % |
| vehicle    |               |                 |           |      |                        |         |           |        |                          |        |       |
|            | 2745          | 1/1             | 43        | 2.1  | 183.9                  | 62.9    | 30.3      | 19.0   | 1343.                    | 6.4    | 51.8  |
|            | 2746          | 1/1             | 43        | 2.4  | 215.3                  | 59.4    | 30.0      | 17.8   | 1110.                    | 6.1    | 57.7  |
|            | 2747          | 1/1             | 43        | 3.2  | 258.4                  | 64.1    | 30.2      | 19.4   | 1261.                    | 6.3    | 58.0  |
|            | 2748          | 1/1             | 43        | 2.5  | 221.0                  | 61.2    | 30.6      | 18.7   | 963.                     | 6.0    | 54.0  |
|            | 2749          | 1/1             | 43        | 2.6  | 237.6                  | 62.3    | 30.5      | 18.9   | 1218.                    | 6.7    | 56.3  |
|            |               |                 | N         | 5    | 5                      | 5       | 5         | 5      | 5                        | 5      | 5     |
|            |               |                 | Mean      | 2.5  | 223.2                  | 62.0    | 30.3      | 18.8   | 1179.                    | 6.3    | 55.6  |
|            |               |                 | Sdev      | 0.39 | 27.65                  | 1.78    | 0.24      | 0.59   | 147.1                    | 0.27   | 2.63  |
| 800 mg/kg  |               |                 |           |      |                        |         |           |        |                          |        |       |
|            | 2780          | 4/1             | 43        | 3.2  | 262.7                  | 65.7    | 30.9      | 20.3   | 1201.                    | 6.4    | 52.2  |
|            | 2781          | 4/1             | 43        | 3.6  | 297.0                  | 64.4    | 31.0      | 20.0   | 1144.                    | 6.5    | 54.4  |
|            | 2782          | 4/1             | 43        | 2.9  | 266.3                  | 63.6    | 30.5      | 19.3   | 1082.                    | 6.3    | 56.7  |
|            | 2783          | 4/1             | 43        | 2.9  | 247.9                  | 64.0    | 29.9      | 19.2   | 1253.                    | 6.4    | 55.4  |
|            | 2784          | 4/1             | 43        | 3.9  | 312.4                  | 65.6    | 30.8      | 20.2   | 1348.                    | 6.2    | 52.4  |
|            |               |                 | N         | 5    | 5                      | 5       | 5         | 5      | 5                        | 5      | 5     |
|            |               |                 | Mean      | 3.3  | 277.3                  | 64.7    | 30.6      | 19.8   | 1206.                    | 6.4    | 54.2  |
|            |               |                 | Sdev      | 0.44 | 26.55                  | 0.95    | 0.44      | 0.51   | 102.0                    | 0.11   | 1.93  |

R - RETICULOCYTES  
CHCM - MEAN HEMOGLOBIN CONC. RETIC.  
MPV - MEAN PLATELET VOLUME

RAB - RETICULOCYTES ABS  
CHr - CELLULAR HEMOGLOBIN RETIC.  
PDW - PLATELET DISTRIBUTION WIDTH

MCVr - MEAN CORPUSCOLAR VOL. RETIC.  
PLT - PLATELETS

CONFIDENTIAL

Appendix 5  
Day 43 Hematology Data  
Test period

Session 1 (Scheduled)  
Fexinidazole

Study Number: 0504-2007

| M a l e s  |               |                 |           |       |                          |                          |                           |                          |                          |                          |  |
|------------|---------------|-----------------|-----------|-------|--------------------------|--------------------------|---------------------------|--------------------------|--------------------------|--------------------------|--|
| Dose Level | Animal Number | Group/ Subgroup | Study Day | PCT % | WBC 10 <sup>3</sup> /mcL | NAB 10 <sup>3</sup> /mcL | LYAB 10 <sup>3</sup> /mcL | MAB 10 <sup>3</sup> /mcL | EAB 10 <sup>3</sup> /mcL | BAB 10 <sup>3</sup> /mcL |  |
| vehicle    |               |                 |           |       |                          |                          |                           |                          |                          |                          |  |
|            | 2745          | 1/1             | 43        | 0.86  | 9.63                     | 1.69                     | 7.44                      | 0.33                     | 0.07                     | 0.05                     |  |
|            | 2746          | 1/1             | 43        | 0.68  | 9.06                     | 1.50                     | 7.15                      | 0.20                     | 0.15                     | 0.02                     |  |
|            | 2747          | 1/1             | 43        | 0.80  | 10.73                    | 2.48                     | 7.63                      | 0.38                     | 0.14                     | 0.03                     |  |
|            | 2748          | 1/1             | 43        | 0.58  | 12.44                    | 1.95                     | 9.59                      | 0.51                     | 0.19                     | 0.04                     |  |
|            | 2749          | 1/1             | 43        | 0.82  | 10.66                    | 1.45                     | 8.83                      | 0.16                     | 0.13                     | 0.02                     |  |
|            |               |                 | N         | 5     | 5                        | 5                        | 5                         | 5                        | 5                        | 5                        |  |
|            |               |                 | Mean      | 0.75  | 10.50                    | 1.81                     | 8.13                      | 0.32                     | 0.14                     | 0.03                     |  |
|            |               |                 | Sdev      | 0.115 | 1.292                    | 0.421                    | 1.038                     | 0.141                    | 0.043                    | 0.013                    |  |
| 800 mg/kg  |               |                 |           |       |                          |                          |                           |                          |                          |                          |  |
|            | 2780          | 4/1             | 43        | 0.76  | 9.94                     | 1.78                     | 7.45                      | 0.38                     | 0.13                     | 0.02                     |  |
|            | 2781          | 4/1             | 43        | 0.75  | 12.22                    | 1.92                     | 9.77                      | 0.20                     | 0.18                     | 0.03                     |  |
|            | 2782          | 4/1             | 43        | 0.68  | 8.92                     | 1.51                     | 6.96                      | 0.26                     | 0.09                     | 0.04                     |  |
|            | 2783          | 4/1             | 43        | 0.81  | 10.98                    | 2.36                     | 7.87                      | 0.46                     | 0.19                     | 0.02                     |  |
|            | 2784          | 4/1             | 43        | 0.84  | 10.88                    | 1.88                     | 8.38                      | 0.40                     | 0.10                     | 0.02                     |  |
|            |               |                 | N         | 5     | 5                        | 5                        | 5                         | 5                        | 5                        | 5                        |  |
|            |               |                 | Mean      | 0.77  | 10.59                    | 1.89                     | 8.09                      | 0.34                     | 0.14                     | 0.03                     |  |
|            |               |                 | Sdev      | 0.061 | 1.235                    | 0.308                    | 1.077                     | 0.107                    | 0.045                    | 0.009                    |  |

PCT - PLATELET HEMATOCRIT  
LYAB - LYMPHOCYTES ABS  
BAB - BASOPHILS ABS

WBC - WHITE BLOOD CELLS  
MAB - MONOCYTES ABS

NAB - NEUTROPHILS ABS  
EAB - EOSINOPHILS ABS



CONFIDENTIAL

Appendix 5  
Day 43 Hematology Data  
Test period

Session 1 (Scheduled)  
Fexinidazole

Study Number: 0504-2007

| M a l e s  |               |                 |           |                           |      |      |      |      |      |      |
|------------|---------------|-----------------|-----------|---------------------------|------|------|------|------|------|------|
| Dose Level | Animal Number | Group/ Subgroup | Study Day | LUAB 10 <sup>3</sup> /mcL | N %  | LY % | M %  | E %  | B %  | LU % |
| vehicle    |               |                 |           |                           |      |      |      |      |      |      |
|            | 2745          | 1/1             | 43        | 0.04                      | 17.6 | 77.3 | 3.5  | 0.8  | 0.5  | 0.4  |
|            | 2746          | 1/1             | 43        | 0.04                      | 16.6 | 78.9 | 2.2  | 1.6  | 0.2  | 0.5  |
|            | 2747          | 1/1             | 43        | 0.08                      | 23.1 | 71.1 | 3.5  | 1.3  | 0.3  | 0.7  |
|            | 2748          | 1/1             | 43        | 0.16                      | 15.7 | 77.1 | 4.1  | 1.5  | 0.3  | 1.3  |
|            | 2749          | 1/1             | 43        | 0.07                      | 13.6 | 82.9 | 1.5  | 1.2  | 0.2  | 0.7  |
|            |               |                 | N         | 5                         | 5    | 5    | 5    | 5    | 5    | 5    |
|            |               |                 | Mean      | 0.08                      | 17.3 | 77.5 | 3.0  | 1.3  | 0.3  | 0.7  |
|            |               |                 | Sdev      | 0.049                     | 3.55 | 4.25 | 1.07 | 0.31 | 0.12 | 0.35 |
| 800 mg/kg  |               |                 |           |                           |      |      |      |      |      |      |
|            | 2780          | 4/1             | 43        | 0.19                      | 17.9 | 74.9 | 3.8  | 1.3  | 0.2  | 1.9  |
|            | 2781          | 4/1             | 43        | 0.13                      | 15.7 | 79.9 | 1.6  | 1.5  | 0.3  | 1.0  |
|            | 2782          | 4/1             | 43        | 0.06                      | 16.9 | 78.1 | 3.0  | 1.0  | 0.4  | 0.7  |
|            | 2783          | 4/1             | 43        | 0.08                      | 21.5 | 71.7 | 4.2  | 1.7  | 0.2  | 0.8  |
|            | 2784          | 4/1             | 43        | 0.09                      | 17.3 | 77.0 | 3.7  | 0.9  | 0.2  | 0.9  |
|            |               |                 | N         | 5                         | 5    | 5    | 5    | 5    | 5    | 5    |
|            |               |                 | Mean      | 0.11                      | 17.9 | 76.3 | 3.3  | 1.3  | 0.3  | 1.1  |
|            |               |                 | Sdev      | 0.051                     | 2.19 | 3.15 | 1.02 | 0.33 | 0.09 | 0.48 |

LUAB - LARGE UNSTAINED CELLS ABS  
M - MONOCYTES %  
LU - LARGE UNSTAINED CELLS %

N - NEUTROPHILS %  
E - EOSINOPHILS %

LY - LYMPHOCITES %  
B - BASOPHILS %

CONFIDENTIAL

Appendix 5  
Day 43 Hematology Data  
Test period

Session 1 (Scheduled)  
Fexinidazole

Study Number: 0504-2007

| F e m a l e s |               |                 |           |                          |          |       |        |        |           |       |          |
|---------------|---------------|-----------------|-----------|--------------------------|----------|-------|--------|--------|-----------|-------|----------|
| Dose Level    | Animal Number | Group/ Subgroup | Study Day | RBC 10 <sup>6</sup> /mcL | HGB g/dL | HCT % | MCV fL | MCH pg | MCHC g/dL | RDW % | HDW g/dL |
| vehicle       |               |                 |           |                          |          |       |        |        |           |       |          |
|               | 2795          | 1/1             | 43        | 8.33                     | 14.4     | 43.7  | 52.5   | 17.2   | 32.8      | 11.4  | 2.16     |
|               | 2796          | 1/1             | 43        | 8.53                     | 15.6     | 47.7  | 55.9   | 18.3   | 32.7      | 11.4  | 2.36     |
|               | 2797          | 1/1             | 43        | 8.10                     | 15.1     | 46.5  | 57.3   | 18.6   | 32.4      | 10.9  | 2.16     |
|               | 2798          | 1/1             | 43        | 8.20                     | 14.6     | 45.2  | 55.1   | 17.7   | 32.2      | 11.6  | 2.48     |
|               | 2799          | 1/1             | 43        | 8.07                     | 14.3     | 44.1  | 54.6   | 17.7   | 32.4      | 11.6  | 2.38     |
|               |               |                 | N         | 5                        | 5        | 5     | 5      | 5      | 5         | 5     | 5        |
|               |               |                 | Mean      | 8.25                     | 14.8     | 45.4  | 55.1   | 17.9   | 32.5      | 11.4  | 2.31     |
|               |               |                 | Sdev      | 0.188                    | 0.54     | 1.67  | 1.77   | 0.55   | 0.24      | 0.29  | 0.143    |
| 800 mg/kg     |               |                 |           |                          |          |       |        |        |           |       |          |
|               | 2830          | 4/1             | 43        | 8.18                     | 14.4     | 44.3  | 54.1   | 17.6   | 32.5      | 11.6  | 2.26     |
|               | 2831          | 4/1             | 43        | 8.47                     | 15.2     | 46.7  | 55.2   | 17.9   | 32.5      | 12.5  | 2.34     |
|               | 2832          | 4/1             | 43        | 7.75                     | 13.8     | 42.9  | 55.4   | 17.9   | 32.2      | 12.2  | 2.38     |
|               | 2833          | 4/1             | 43        | 8.46                     | 15.2     | 46.0  | 54.3   | 17.9   | 33.0      | 12.7  | 2.46     |
|               | 2834          | 4/1             | 43        | 7.96                     | 14.4     | 45.1  | 56.6   | 18.0   | 31.8      | 11.9  | 2.28     |
|               |               |                 | N         | 5                        | 5        | 5     | 5      | 5      | 5         | 5     | 5        |
|               |               |                 | Mean      | 8.16                     | 14.6     | 45.0  | 55.1   | 17.9   | 32.4      | 12.2  | 2.34     |
|               |               |                 | Sdev      | 0.314                    | 0.60     | 1.48  | 1.00   | 0.15   | 0.44      | 0.44  | 0.080    |

RBC - RED BLOOD CELLS

MCV - MEAN CORPUSCULAR VOLUME

RDW - RED CELL DISTRIBUTION WIDTH

HGB - HEMOGLOBIN

MCH - MEAN CORPUSCULAR HEMOGLOBIN

HDW - HEMOGLOBIN DISTRIB. WIDTH

HCT - HEMATOCRIT

MCHC - MEAN CORPUSCULAR HGB CONC.

CONFIDENTIAL

Appendix 5  
Day 43 Hematology Data  
Test period

Session 1 (Scheduled)  
Fexinidazole

Study Number: 0504-2007

| F e m a l e s |               |                 |           |      |                        |         |           |        |                          |        |       |
|---------------|---------------|-----------------|-----------|------|------------------------|---------|-----------|--------|--------------------------|--------|-------|
| Dose Level    | Animal Number | Group/ Subgroup | Study Day | R %  | RAB 10 <sup>9</sup> /L | MCVr fL | CHCM g/dL | CHr pg | PLT 10 <sup>3</sup> /mcL | MPV fL | PDW % |
| vehicle       |               |                 |           |      |                        |         |           |        |                          |        |       |
|               | 2795          | 1/1             | 43        | 2.7  | 221.0                  | 62.0    | 30.1      | 18.6   | 1224.                    | 6.7    | 50.3  |
|               | 2796          | 1/1             | 43        | 2.8  | 235.9                  | 65.9    | 30.7      | 20.2   | 1364.                    | 6.8    | 53.7  |
|               | 2797          | 1/1             | 43        | 2.4  | 196.3                  | 64.9    | 31.1      | 20.2   | 1322.                    | 6.7    | 52.0  |
|               | 2798          | 1/1             | 43        | 3.2  | 263.1                  | 66.6    | 30.5      | 20.3   | 1452.                    | 6.7    | 51.3  |
|               | 2799          | 1/1             | 43        | 2.5  | 201.3                  | 64.7    | 30.1      | 19.4   | 1367.                    | 6.7    | 51.5  |
|               |               |                 | N         | 5    | 5                      | 5       | 5         | 5      | 5                        | 5      | 5     |
|               |               |                 | Mean      | 2.7  | 223.5                  | 64.8    | 30.5      | 19.7   | 1346.                    | 6.7    | 51.8  |
|               |               |                 | Sdev      | 0.31 | 27.21                  | 1.75    | 0.42      | 0.73   | 82.9                     | 0.04   | 1.25  |
| 800 mg/kg     |               |                 |           |      |                        |         |           |        |                          |        |       |
|               | 2830          | 4/1             | 43        | 2.2  | 180.0                  | 65.3    | 29.6      | 19.2   | 1438.                    | 6.8    | 50.3  |
|               | 2831          | 4/1             | 43        | 1.5  | 126.9                  | 62.9    | 29.9      | 18.7   | 1602.                    | 7.0    | 54.1  |
|               | 2832          | 4/1             | 43        | 2.9  | 224.5                  | 65.6    | 30.3      | 19.8   | 1268.                    | 6.7    | 53.1  |
|               | 2833          | 4/1             | 43        | 2.7  | 231.2                  | 64.2    | 29.9      | 19.2   | 1333.                    | 6.8    | 53.7  |
|               | 2834          | 4/1             | 43        | 2.1  | 170.1                  | 64.6    | 30.1      | 19.4   | 1466.                    | 6.5    | 50.0  |
|               |               |                 | N         | 5    | 5                      | 5       | 5         | 5      | 5                        | 5      | 5     |
|               |               |                 | Mean      | 2.3  | 186.5                  | 64.5    | 30.0      | 19.3   | 1421.                    | 6.8    | 52.2  |
|               |               |                 | Sdev      | 0.55 | 42.74                  | 1.06    | 0.26      | 0.40   | 128.7                    | 0.18   | 1.94  |

R - RETICULOCYTES  
CHCM - MEAN HEMOGLOBIN CONC. RETIC.  
MPV - MEAN PLATELET VOLUME

RAB - RETICULOCYTES ABS  
CHr - CELLULAR HEMOGLOBIN RETIC.  
PDW - PLATELET DISTRIBUTION WIDTH

MCVr - MEAN CORPUSCOLAR VOL. RETIC.  
PLT - PLATELETS

CONFIDENTIAL

Appendix 5  
Day 43 Hematology Data  
Test period

Session 1 (Scheduled)  
Fexinidazole

Study Number: 0504-2007

| F e m a l e s |               |                 |           |       |                          |                          |                           |                          |                          |                          |
|---------------|---------------|-----------------|-----------|-------|--------------------------|--------------------------|---------------------------|--------------------------|--------------------------|--------------------------|
| Dose Level    | Animal Number | Group/ Subgroup | Study Day | PCT % | WBC 10 <sup>3</sup> /mcL | NAB 10 <sup>3</sup> /mcL | LYAB 10 <sup>3</sup> /mcL | MAB 10 <sup>3</sup> /mcL | EAB 10 <sup>3</sup> /mcL | BAB 10 <sup>3</sup> /mcL |
| vehicle       |               |                 |           |       |                          |                          |                           |                          |                          |                          |
|               | 2795          | 1/1             | 43        | 0.82  | 13.56                    | 1.72                     | 11.10                     | 0.29                     | 0.14                     | 0.02                     |
|               | 2796          | 1/1             | 43        | 0.92  | 9.10                     | 1.39                     | 7.23                      | 0.20                     | 0.14                     | 0.02                     |
|               | 2797          | 1/1             | 43        | 0.89  | 8.88                     | 2.03                     | 6.26                      | 0.27                     | 0.10                     | 0.02                     |
|               | 2798          | 1/1             | 43        | 0.97  | 11.28                    | 1.26                     | 9.45                      | 0.31                     | 0.14                     | 0.03                     |
|               | 2799          | 1/1             | 43        | 0.91  | 10.25                    | 1.04                     | 8.82                      | 0.14                     | 0.11                     | 0.03                     |
|               |               |                 | N         | 5     | 5                        | 5                        | 5                         | 5                        | 5                        | 5                        |
|               |               |                 | Mean      | 0.90  | 10.61                    | 1.49                     | 8.57                      | 0.24                     | 0.13                     | 0.02                     |
|               |               |                 | Sdev      | 0.054 | 1.907                    | 0.390                    | 1.895                     | 0.070                    | 0.019                    | 0.005                    |
| 800 mg/kg     |               |                 |           |       |                          |                          |                           |                          |                          |                          |
|               | 2830          | 4/1             | 43        | 0.98  | 11.37                    | 1.63                     | 9.18                      | 0.31                     | 0.12                     | 0.02                     |
|               | 2831          | 4/1             | 43        | 1.11  | 12.38                    | 1.49                     | 10.00                     | 0.36                     | 0.16                     | 0.05                     |
|               | 2832          | 4/1             | 43        | 0.85  | 11.99                    | 1.01                     | 10.16                     | 0.40                     | 0.14                     | 0.02                     |
|               | 2833          | 4/1             | 43        | 0.91  | 14.11                    | 1.68                     | 11.61                     | 0.48                     | 0.11                     | 0.05                     |
|               | 2834          | 4/1             | 43        | 0.95  | 17.26                    | 2.42                     | 14.07                     | 0.44                     | 0.03                     | 0.04                     |
|               |               |                 | N         | 5     | 5                        | 5                        | 5                         | 5                        | 5                        | 5                        |
|               |               |                 | Mean      | 0.96  | 13.42                    | 1.65                     | 11.00                     | 0.40                     | 0.11                     | 0.04                     |
|               |               |                 | Sdev      | 0.097 | 2.374                    | 0.507                    | 1.925                     | 0.066                    | 0.050                    | 0.015                    |

PCT - PLATELET HEMATOCRIT  
LYAB - LYMPHOCYTES ABS  
BAB - BASOPHILS ABS

WBC - WHITE BLOOD CELLS  
MAB - MONOCYTES ABS

NAB - NEUTROPHILS ABS  
EAB - EOSINOPHILS ABS

CONFIDENTIAL

Appendix 5  
Day 43 Hematology Data  
Test period

Session 1 (Scheduled)  
Fexinidazole

Study Number: 0504-2007

| F e m a l e s |               |                 |           |                           |      |      |      |      |      |      |
|---------------|---------------|-----------------|-----------|---------------------------|------|------|------|------|------|------|
| Dose Level    | Animal Number | Group/ Subgroup | Study Day | LUAB 10 <sup>3</sup> /mcL | N %  | LY % | M %  | E %  | B %  | LU % |
| vehicle       |               |                 |           |                           |      |      |      |      |      |      |
|               | 2795          | 1/1             | 43        | 0.29                      | 12.7 | 81.9 | 2.1  | 1.0  | 0.2  | 2.1  |
|               | 2796          | 1/1             | 43        | 0.12                      | 15.3 | 79.5 | 2.2  | 1.6  | 0.2  | 1.3  |
|               | 2797          | 1/1             | 43        | 0.19                      | 22.8 | 70.5 | 3.0  | 1.2  | 0.3  | 2.2  |
|               | 2798          | 1/1             | 43        | 0.09                      | 11.2 | 83.7 | 2.7  | 1.2  | 0.2  | 0.8  |
|               | 2799          | 1/1             | 43        | 0.11                      | 10.1 | 86.1 | 1.3  | 1.1  | 0.3  | 1.1  |
|               |               |                 | N         | 5                         | 5    | 5    | 5    | 5    | 5    | 5    |
|               |               |                 | Mean      | 0.16                      | 14.4 | 80.3 | 2.3  | 1.2  | 0.2  | 1.5  |
|               |               |                 | Sdev      | 0.082                     | 5.07 | 6.01 | 0.65 | 0.23 | 0.05 | 0.62 |
| 800 mg/kg     |               |                 |           |                           |      |      |      |      |      |      |
|               | 2830          | 4/1             | 43        | 0.12                      | 14.3 | 80.7 | 2.7  | 1.0  | 0.2  | 1.1  |
|               | 2831          | 4/1             | 43        | 0.34                      | 12.0 | 80.7 | 2.9  | 1.3  | 0.4  | 2.7  |
|               | 2832          | 4/1             | 43        | 0.25                      | 8.5  | 84.8 | 3.4  | 1.2  | 0.2  | 2.1  |
|               | 2833          | 4/1             | 43        | 0.18                      | 11.9 | 82.3 | 3.4  | 0.8  | 0.3  | 1.3  |
|               | 2834          | 4/1             | 43        | 0.27                      | 14.0 | 81.5 | 2.5  | 0.2  | 0.2  | 1.6  |
|               |               |                 | N         | 5                         | 5    | 5    | 5    | 5    | 5    | 5    |
|               |               |                 | Mean      | 0.23                      | 12.1 | 82.0 | 3.0  | 0.9  | 0.3  | 1.8  |
|               |               |                 | Sdev      | 0.085                     | 2.32 | 1.70 | 0.41 | 0.44 | 0.09 | 0.65 |

LUAB - LARGE UNSTAINED CELLS ABS  
M - MONOCYTES %  
LU - LARGE UNSTAINED CELLS %

N - NEUTROPHILS %  
E - EOSINOPHILS %

LY - LYMPHOCITES %  
B - BASOPHILS %

## ***Appendix 6 Clinical Chemistry***

CONFIDENTIAL

Appendix 6  
Day 29 Clinical Chemistry Data  
Test period

Session 1 (Scheduled)  
Fexinidazole

Study Number: 0504-2007

| M a l e s  |               |                 |           |            |            |          |          |         |          |            |
|------------|---------------|-----------------|-----------|------------|------------|----------|----------|---------|----------|------------|
| Dose Level | Animal Number | Group/ Subgroup | Study Day | UREA mg/dL | CREA mg/dL | AST IU/L | ALT IU/L | AP IU/L | GGT IU/L | TBIL mg/dL |
| vehicle    |               |                 |           |            |            |          |          |         |          |            |
|            | 2745          | 1/1             | 29        | 24.        | 0.59       | 132.     | 24.      | 187.    | 6.       | 0.11       |
|            | 2746          | 1/1             | 29        | 35.        | 0.56       | 128.     | 28.      | 203.    | 7.       | 0.09       |
|            | 2747          | 1/1             | 29        | 25.        | 0.54       | 129.     | 26.      | 139.    | 5.       | 0.08       |
|            | 2748          | 1/1             | 29        | 31.        | 0.51       | 170.     | 39.      | 188.    | 7.       | 0.06       |
|            | 2749          | 1/1             | 29        | 27.        | 0.53       | 178.     | 22.      | 221.    | 1.       | 0.09       |
|            |               |                 | N         | 5          | 5          | 5        | 5        | 5       | 5        | 5          |
|            |               |                 | Mean      | 28.        | 0.55       | 147.     | 28.      | 188.    | 5.       | 0.09       |
|            |               |                 | Sdev      | 4.6        | 0.030      | 24.5     | 6.6      | 30.5    | 2.5      | 0.018      |
| 50 mg/kg   |               |                 |           |            |            |          |          |         |          |            |
|            | 2755          | 2/1             | 29        | 28.        | 0.58       | 128.     | 25.      | 131.    | NT       | 0.04       |
|            | 2756          | 2/1             | 29        | 28.        | 0.56       | 150.     | 36.      | 213.    | 5.       | 0.05       |
|            | 2757          | 2/1             | 29        | 29.        | 0.57       | 160.     | 25.      | 115.    | 5.       | 0.06       |
|            | 2758          | 2/1             | 29        | 23.        | 0.49       | 116.     | 32.      | 93.     | NT       | 0.06       |
|            | 2759          | 2/1             | 29        | 29.        | 0.59       | 108.     | 24.      | 170.    | NT       | 0.07       |
|            |               |                 | N         | 5          | 5          | 5        | 5        | 5       | 2        | 5          |
|            |               |                 | Mean      | 27.        | 0.56       | 132.     | 28.      | 144.    | 5.       | 0.06       |
|            |               |                 | Sdev      | 2.5        | 0.040      | 22.1     | 5.3      | 47.6    | 0.0      | 0.011      |
| 200 mg/kg  |               |                 |           |            |            |          |          |         |          |            |
|            | 2765          | 3/1             | 29        | 28.        | 0.54       | 143.     | 30.      | 120.    | NT       | 0.05       |
|            | 2766          | 3/1             | 29        | 30.        | 0.56       | 125.     | 25.      | 128.    | NT       | 0.08       |
|            | 2767          | 3/1             | 29        | 31.        | 0.56       | 150.     | 34.      | 128.    | NT       | 0.08       |
|            | 2768          | 3/1             | 29        | 29.        | 0.61       | 101.     | 24.      | 139.    | NT       | 0.07       |
|            | 2769          | 3/1             | 29        | 30.        | 0.54       | 135.     | 31.      | 147.    | NT       | 0.05       |
|            |               |                 | N         | 5          | 5          | 5        | 5        | 5       | 0        | 5          |
|            |               |                 | Mean      | 30.        | 0.56       | 131.     | 29.      | 132.    | -        | 0.07       |
|            |               |                 | Sdev      | 1.1        | 0.029      | 19.1     | 4.2      | 10.6    | -        | 0.015      |

UREA - UREA  
ALT - ALANINE AMINO TRANSFERASE  
TBIL - TOTAL BILIRUBIN

CREA - CREATININE  
AP - ALKALINE PHOSPHATASE

AST - ASPARTATE AMINO TRANSFERASE  
GGT - GAMMA GLUTAMYL TRANSFERASE

CONFIDENTIAL

Appendix 6  
 Day 29 Clinical Chemistry Data  
 Test period

Session 1 (Scheduled)  
 Fexinidazole

Study Number: 0504-2007

| M a l e s  |               |                 |           |            |            |          |          |         |          |            |
|------------|---------------|-----------------|-----------|------------|------------|----------|----------|---------|----------|------------|
| Dose Level | Animal Number | Group/ Subgroup | Study Day | UREA mg/dL | CREA mg/dL | AST IU/L | ALT IU/L | AP IU/L | GGT IU/L | TBIL mg/dL |
| 800 mg/kg  |               |                 |           |            |            |          |          |         |          |            |
|            | 2780          | 4/1             | 29        | 27.        | 0.60       | 122.     | 22.      | 150.    | NT       | 0.07       |
|            | 2781          | 4/1             | 29        | 27.        | 0.55       | 159.     | 27.      | 96.     | NT       | 0.07       |
|            | 2782          | 4/1             | 29        | 30.        | 0.54       | 101.     | 25.      | 122.    | NT       | 0.06       |
|            | 2783          | 4/1             | 29        | 24.        | 0.65       | 123.     | 21.      | 93.     | NT       | 0.08       |
|            | 2784          | 4/1             | 29        | 29.        | 0.55       | 114.     | 29.      | 140.    | 5.       | 0.06       |
|            |               |                 | N         | 5          | 5          | 5        | 5        | 5       | 1        | 5          |
|            |               |                 | Mean      | 27.        | 0.58       | 124.     | 25.      | 120.    | 5.       | 0.07       |
|            |               |                 | Sdev      | 2.3        | 0.047      | 21.6     | 3.3      | 25.5    | -        | 0.008      |

UREA - UREA  
 ALT - ALANINE AMINO TRANSFERASE  
 TBIL - TOTAL BILIRUBIN

CREA - CREATININE  
 AP - ALKALINE PHOSPHATASE

AST - ASPARTATE AMINO TRANSFERASE  
 GGT - GAMMA GLUTAMYL TRANSFERASE



CONFIDENTIAL

Appendix 6  
Day 29 Clinical Chemistry Data  
Test period

Session 1 (Scheduled)  
Fexinidazole

Study Number: 0504-2007

| M a l e s  |               |                 |           |           |          |           |            |          |            |  |
|------------|---------------|-----------------|-----------|-----------|----------|-----------|------------|----------|------------|--|
| Dose Level | Animal Number | Group/ Subgroup | Study Day | TPRO g/dL | ALB g/dL | GLOB g/dL | GLUC mg/dL | TG mg/dL | TCHO mg/dL |  |
| vehicle    |               |                 |           |           |          |           |            |          |            |  |
|            | 2745          | 1/1             | 29        | 6.9       | 3.20     | 3.7       | 85.        | 74.      | 62.        |  |
|            | 2746          | 1/1             | 29        | 6.6       | 3.10     | 3.5       | 73.        | 34.      | 52.        |  |
|            | 2747          | 1/1             | 29        | 6.8       | 3.15     | 3.7       | 87.        | 78.      | 53.        |  |
|            | 2748          | 1/1             | 29        | 6.3       | 2.87     | 3.4       | 74.        | 58.      | 56.        |  |
|            | 2749          | 1/1             | 29        | 6.7       | 3.14     | 3.6       | 83.        | 40.      | 52.        |  |
|            |               |                 | N         | 5         | 5        | 5         | 5          | 5        | 5          |  |
|            |               |                 | Mean      | 6.7       | 3.09     | 3.6       | 80.        | 57.      | 55.        |  |
|            |               |                 | Sdev      | 0.23      | 0.129    | 0.11      | 6.5        | 19.7     | 4.2        |  |
| 50 mg/kg   |               |                 |           |           |          |           |            |          |            |  |
|            | 2755          | 2/1             | 29        | 6.8       | 3.01     | 3.8       | 82.        | 67.      | 55.        |  |
|            | 2756          | 2/1             | 29        | 6.7       | 3.10     | 3.6       | 88.        | 59.      | 74.        |  |
|            | 2757          | 2/1             | 29        | 7.1       | 3.21     | 3.9       | 75.        | 45.      | 47.        |  |
|            | 2758          | 2/1             | 29        | 6.6       | 2.99     | 3.6       | 74.        | 34.      | 40.        |  |
|            | 2759          | 2/1             | 29        | 6.6       | 3.20     | 3.4       | 88.        | 77.      | 55.        |  |
|            |               |                 | N         | 5         | 5        | 5         | 5          | 5        | 5          |  |
|            |               |                 | Mean      | 6.8       | 3.10     | 3.7       | 81.        | 56.      | 54.        |  |
|            |               |                 | Sdev      | 0.21      | 0.103    | 0.19      | 6.8        | 17.1     | 12.7       |  |
| 200 mg/kg  |               |                 |           |           |          |           |            |          |            |  |
|            | 2765          | 3/1             | 29        | 6.8       | 3.11     | 3.7       | 74.        | 42.      | 57.        |  |
|            | 2766          | 3/1             | 29        | 7.0       | 3.15     | 3.9       | 87.        | 33.      | 54.        |  |
|            | 2767          | 3/1             | 29        | 6.5       | 3.17     | 3.3       | 89.        | 28.      | 40.        |  |
|            | 2768          | 3/1             | 29        | 6.8       | 3.18     | 3.6       | 94.        | 87.      | 76.        |  |
|            | 2769          | 3/1             | 29        | 7.0       | 3.19     | 3.8       | 78.        | 26.      | 43.        |  |
|            |               |                 | N         | 5         | 5        | 5         | 5          | 5        | 5          |  |
|            |               |                 | Mean      | 6.8       | 3.16     | 3.7       | 84.        | 43.      | 54.        |  |
|            |               |                 | Sdev      | 0.20      | 0.032    | 0.21      | 8.2        | 25.3     | 14.2       |  |

TPRO - TOTAL PROTEIN  
GLUC - GLUCOSE

ALB - ALBUMIN  
TG - TRIGLYCERIDES

GLOB - GLOBULIN  
TCHO - TOTAL CHOLESTEROL

CONFIDENTIAL

Appendix 6  
 Day 29 Clinical Chemistry Data  
 Test period

Session 1 (Scheduled)  
 Fexinidazole

Study Number: 0504-2007

| M a l e s  |               |                 |           |           |          |           |            |          |            |
|------------|---------------|-----------------|-----------|-----------|----------|-----------|------------|----------|------------|
| Dose Level | Animal Number | Group/ Subgroup | Study Day | TPRO g/dL | ALB g/dL | GLOB g/dL | GLUC mg/dL | TG mg/dL | TCHO mg/dL |
| 800 mg/kg  |               |                 |           |           |          |           |            |          |            |
|            | 2780          | 4/1             | 29        | 7.0       | 3.24     | 3.8       | 79.        | 42.      | 93.        |
|            | 2781          | 4/1             | 29        | 7.2       | 3.34     | 3.9       | 79.        | 21.      | 56.        |
|            | 2782          | 4/1             | 29        | 6.9       | 3.08     | 3.8       | 76.        | 14.      | 59.        |
|            | 2783          | 4/1             | 29        | 7.1       | 3.21     | 3.9       | 81.        | 31.      | 63.        |
|            | 2784          | 4/1             | 29        | 6.6       | 3.00     | 3.6       | 73.        | 32.      | 48.        |
|            |               |                 | N         | 5         | 5        | 5         | 5          | 5        | 5          |
|            |               |                 | Mean      | 7.0       | 3.17     | 3.8       | 78.        | 28.      | 64.        |
|            |               |                 | Sdev      | 0.23      | 0.134    | 0.11      | 3.1        | 10.8     | 17.2       |

TPRO - TOTAL PROTEIN  
 GLUC - GLUCOSE

ALB - ALBUMIN  
 TG - TRIGLYCERIDES

GLOB - GLOBULIN  
 TCHO - TOTAL CHOLESTEROL

CONFIDENTIAL

Appendix 6  
Day 29 Clinical Chemistry Data  
Test period

Session 1 (Scheduled)  
Fexinidazole

Study Number: 0504-2007

| M a l e s  |               |                 |           |          |            |      |          |         |          |
|------------|---------------|-----------------|-----------|----------|------------|------|----------|---------|----------|
| Dose Level | Animal Number | Group/ Subgroup | Study Day | CA mg/dL | PHOS mg/dL | AG   | NA mEq/L | K mEq/L | CL mEq/L |
| vehicle    |               |                 |           |          |            |      |          |         |          |
|            | 2745          | 1/1             | 29        | 10.5     | 8.6        | 0.9  | 140.0    | 4.9     | 102.0    |
|            | 2746          | 1/1             | 29        | 9.9      | 8.6        | 0.9  | 139.0    | 4.5     | 103.0    |
|            | 2747          | 1/1             | 29        | 10.3     | 8.7        | 0.9  | 140.0    | 4.8     | 103.0    |
|            | 2748          | 1/1             | 29        | 10.2     | 8.9        | 0.8  | 139.0    | 4.9     | 102.0    |
|            | 2749          | 1/1             | 29        | 10.2     | 9.0        | 0.9  | 140.0    | 5.0     | 103.0    |
|            |               |                 | N         | 5        | 5          | 5    | 5        | 5       | 5        |
|            |               |                 | Mean      | 10.2     | 8.8        | 0.9  | 139.6    | 4.8     | 102.6    |
|            |               |                 | Sdev      | 0.22     | 0.18       | 0.02 | 0.55     | 0.17    | 0.55     |
| 50 mg/kg   |               |                 |           |          |            |      |          |         |          |
|            | 2755          | 2/1             | 29        | 10.3     | 9.1        | 0.8  | 140.0    | 4.9     | 101.0    |
|            | 2756          | 2/1             | 29        | 10.2     | 7.9        | 0.9  | 141.0    | 4.7     | 103.0    |
|            | 2757          | 2/1             | 29        | 10.1     | 8.7        | 0.8  | 141.0    | 5.1     | 102.0    |
|            | 2758          | 2/1             | 29        | 10.2     | 8.5        | 0.8  | 141.0    | 5.0     | 102.0    |
|            | 2759          | 2/1             | 29        | 10.2     | 9.5        | 0.9  | 142.0    | 5.2     | 103.0    |
|            |               |                 | N         | 5        | 5          | 5    | 5        | 5       | 5        |
|            |               |                 | Mean      | 10.2     | 8.7        | 0.9  | 141.0    | 5.0     | 102.2    |
|            |               |                 | Sdev      | 0.07     | 0.61       | 0.06 | 0.71     | 0.18    | 0.84     |
| 200 mg/kg  |               |                 |           |          |            |      |          |         |          |
|            | 2765          | 3/1             | 29        | 9.5      | 8.3        | 0.8  | 140.0    | 4.8     | 103.0    |
|            | 2766          | 3/1             | 29        | 10.1     | 7.8        | 0.8  | 142.0    | 4.4     | 102.0    |
|            | 2767          | 3/1             | 29        | 9.8      | 7.9        | 1.0  | 142.0    | 4.4     | 104.0    |
|            | 2768          | 3/1             | 29        | 10.3     | 8.0        | 0.9  | 141.0    | 4.9     | 104.0    |
|            | 2769          | 3/1             | 29        | 10.5     | 8.6        | 0.8  | 143.0    | 5.3     | 104.0    |
|            |               |                 | N         | 5        | 5          | 5    | 5        | 5       | 5        |
|            |               |                 | Mean      | 10.0     | 8.1        | 0.9  | 141.6    | 4.8     | 103.4    |
|            |               |                 | Sdev      | 0.40     | 0.33       | 0.05 | 1.14     | 0.36    | 0.89     |

CA - CALCIUM  
NA - SODIUM

PHOS - PHOSPHOROUS  
K - POTASSIUM

AG - ALBUMIN/GLOBULIN  
CL - CHLORIDE

CONFIDENTIAL

Appendix 6  
 Day 29 Clinical Chemistry Data  
 Test period

Session 1 (Scheduled)  
 Fexinidazole

Study Number: 0504-2007

| M a l e s  |               |                 |           |          |            |      |          |         |          |
|------------|---------------|-----------------|-----------|----------|------------|------|----------|---------|----------|
| Dose Level | Animal Number | Group/ Subgroup | Study Day | CA mg/dL | PHOS mg/dL | AG   | NA mEq/L | K mEq/L | CL mEq/L |
| 800 mg/kg  |               |                 |           |          |            |      |          |         |          |
|            | 2780          | 4/1             | 29        | 10.1     | 8.0        | 0.9  | 143.0    | 5.0     | 103.0    |
|            | 2781          | 4/1             | 29        | 12.1     | 15.3       | 0.9  | 143.0    | 5.6     | 103.0    |
|            | 2782          | 4/1             | 29        | 10.0     | 12.8       | 0.8  | 143.0    | 5.1     | 104.0    |
|            | 2783          | 4/1             | 29        | 9.6      | 11.8       | 0.8  | 142.0    | 4.9     | 104.0    |
|            | 2784          | 4/1             | 29        | 9.5      | 9.2        | 0.8  | 144.0    | 4.7     | 103.0    |
|            |               |                 | N         | 5        | 5          | 5    | 5        | 5       | 5        |
|            |               |                 | Mean      | 10.3     | 11.4       | 0.8  | 143.0    | 5.1     | 103.4    |
|            |               |                 | Sdev      | 1.06     | 2.90       | 0.02 | 0.71     | 0.33    | 0.55     |

CA - CALCIUM  
 NA - SODIUM

PHOS - PHOSPHOROUS  
 K - POTASSIUM

AG - ALBUMIN/GLOBULIN  
 CL - CHLORIDE

CONFIDENTIAL

Appendix 6  
Day 29 Clinical Chemistry Data  
Test period

Session 1 (Scheduled)  
Fexinidazole

Study Number: 0504-2007

| F e m a l e s |               |                 |           |            |            |          |          |         |          |            |
|---------------|---------------|-----------------|-----------|------------|------------|----------|----------|---------|----------|------------|
| Dose Level    | Animal Number | Group/ Subgroup | Study Day | UREA mg/dL | CREA mg/dL | AST IU/L | ALT IU/L | AP IU/L | GGT IU/L | TBIL mg/dL |
| vehicle       |               |                 |           |            |            |          |          |         |          |            |
|               | 2795          | 1/1             | 29        | 41.        | 0.61       | 118.     | 29.      | 120.    | 6.       | 0.12       |
|               | 2796          | 1/1             | 29        | 35.        | 0.62       | 129.     | 32.      | 89.     | 5.       | 0.14       |
|               | 2797          | 1/1             | 29        | 33.        | 0.57       | 87.      | 25.      | 64.     | 5.       | 0.16       |
|               | 2798          | 1/1             | 29        | 31.        | 0.64       | 159.     | 36.      | 101.    | 6.       | 0.07       |
|               | 2799          | 1/1             | 29        | 32.        | 0.64       | 118.     | 21.      | 86.     | 5.       | 0.11       |
|               |               |                 | N         | 5          | 5          | 5        | 5        | 5       | 5        | 5          |
|               |               |                 | Mean      | 34.        | 0.62       | 122.     | 29.      | 92.     | 5.       | 0.12       |
|               |               |                 | Sdev      | 4.0        | 0.029      | 25.9     | 5.9      | 20.6    | 0.5      | 0.034      |
| 50 mg/kg      |               |                 |           |            |            |          |          |         |          |            |
|               | 2805          | 2/1             | 29        | 28.        | 0.60       | 129.     | 23.      | 80.     | NT       | 0.10       |
|               | 2806          | 2/1             | 29        | 34.        | 0.63       | 149.     | 28.      | 97.     | 5.       | 0.10       |
|               | 2807          | 2/1             | 29        | 38.        | 0.67       | 116.     | 33.      | 93.     | 4.       | 0.12       |
|               | 2808          | 2/1             | 29        | 34.        | 0.71       | 101.     | 25.      | 68.     | NT       | 0.12       |
|               | 2809          | 2/1             | 29        | 32.        | 0.65       | 136.     | 27.      | 71.     | NT       | 0.11       |
|               |               |                 | N         | 5          | 5          | 5        | 5        | 5       | 2        | 5          |
|               |               |                 | Mean      | 33.        | 0.65       | 126.     | 27.      | 82.     | 5.       | 0.11       |
|               |               |                 | Sdev      | 3.6        | 0.041      | 18.5     | 3.8      | 12.9    | 0.7      | 0.010      |
| 200 mg/kg     |               |                 |           |            |            |          |          |         |          |            |
|               | 2815          | 3/1             | 29        | 35.        | 0.79       | 118.     | 30.      | 59.     | NT       | 0.13       |
|               | 2816          | 3/1             | 29        | 32.        | 0.74       | 150.     | 26.      | 95.     | 5.       | 0.10       |
|               | 2817          | 3/1             | 29        | 27.        | 0.73       | 102.     | 23.      | 58.     | NT       | 0.14       |
|               | 2818          | 3/1             | 29        | 31.        | 0.74       | 152.     | 27.      | 48.     | NT       | 0.11       |
|               | 2819          | 3/1             | 29        | 29.        | 0.67       | 128.     | 23.      | 115.    | 5.       | 0.09       |
|               |               |                 | N         | 5          | 5          | 5        | 5        | 5       | 2        | 5          |
|               |               |                 | Mean      | 31.        | 0.73       | 130.     | 26.      | 75.     | 5.       | 0.11       |
|               |               |                 | Sdev      | 3.0        | 0.043      | 21.3     | 2.9      | 28.6    | 0.0      | 0.021      |

UREA - UREA  
ALT - ALANINE AMINO TRANSFERASE  
TBIL - TOTAL BILIRUBIN

CREA - CREATININE  
AP - ALKALINE PHOSPHATASE

AST - ASPARTATE AMINO TRANSFERASE  
GGT - GAMMA GLUTAMYL TRANSFERASE

CONFIDENTIAL

Appendix 6  
 Day 29 Clinical Chemistry Data  
 Test period

Session 1 (Scheduled)  
 Fexinidazole

Study Number: 0504-2007

| F e m a l e s |               |                 |           |            |            |          |          |         |          |            |
|---------------|---------------|-----------------|-----------|------------|------------|----------|----------|---------|----------|------------|
| Dose Level    | Animal Number | Group/ Subgroup | Study Day | UREA mg/dL | CREA mg/dL | AST IU/L | ALT IU/L | AP IU/L | GGT IU/L | TBIL mg/dL |
| 800 mg/kg     |               |                 |           |            |            |          |          |         |          |            |
|               | 2830          | 4/1             | 29        | 34.        | 0.71       | 113.     | 22.      | 61.     | NT       | 0.10       |
|               | 2831          | 4/1             | 29        | 43.        | 0.81       | 93.      | 23.      | 62.     | 4.       | 0.10       |
|               | 2832          | 4/1             | 29        | 34.        | 0.83       | 138.     | 23.      | 60.     | NT       | 0.12       |
|               | 2833          | 4/1             | 29        | 34.        | 0.78       | 129.     | 22.      | 75.     | NT       | 0.10       |
|               | 2834          | 4/1             | 29        | 40.        | 0.80       | 98.      | 25.      | 47.     | NT       | 0.11       |
|               |               |                 | N         | 5          | 5          | 5        | 5        | 5       | 1        | 5          |
|               |               |                 | Mean      | 37.        | 0.79       | 114.     | 23.      | 61.     | 4.       | 0.11       |
|               |               |                 | Sdev      | 4.2        | 0.046      | 19.4     | 1.2      | 9.9     | -        | 0.009      |

UREA - UREA  
 ALT - ALANINE AMINO TRANSFERASE  
 TBIL - TOTAL BILIRUBIN

CREA - CREATININE  
 AP - ALKALINE PHOSPHATASE

AST - ASPARTATE AMINO TRANSFERASE  
 GGT - GAMMA GLUTAMYL TRANSFERASE

CONFIDENTIAL

Appendix 6  
Day 29 Clinical Chemistry Data  
Test period

Session 1 (Scheduled)  
Fexinidazole

Study Number: 0504-2007

| F e m a l e s |               |                 |           |           |          |           |            |          |            |
|---------------|---------------|-----------------|-----------|-----------|----------|-----------|------------|----------|------------|
| Dose Level    | Animal Number | Group/ Subgroup | Study Day | TPRO g/dL | ALB g/dL | GLOB g/dL | GLUC mg/dL | TG mg/dL | TCHO mg/dL |
| vehicle       |               |                 |           |           |          |           |            |          |            |
|               | 2795          | 1/1             | 29        | 7.6       | 3.50     | 4.1       | 107.       | 31.      | 61.        |
|               | 2796          | 1/1             | 29        | 7.2       | 3.48     | 3.7       | 84.        | 28.      | 87.        |
|               | 2797          | 1/1             | 29        | 7.6       | 3.68     | 3.9       | 93.        | 41.      | 57.        |
|               | 2798          | 1/1             | 29        | 6.9       | 3.16     | 3.7       | 80.        | 32.      | 57.        |
|               | 2799          | 1/1             | 29        | 7.2       | 3.47     | 3.7       | 89.        | 38.      | 90.        |
|               |               |                 | N         | 5         | 5        | 5         | 5          | 5        | 5          |
|               |               |                 | Mean      | 7.3       | 3.46     | 3.8       | 91.        | 34.      | 70.        |
|               |               |                 | Sdev      | 0.30      | 0.187    | 0.17      | 10.4       | 5.3      | 16.6       |
| 50 mg/kg      |               |                 |           |           |          |           |            |          |            |
|               | 2805          | 2/1             | 29        | 7.2       | 3.43     | 3.8       | 99.        | 41.      | 75.        |
|               | 2806          | 2/1             | 29        | 7.3       | 3.26     | 4.0       | 87.        | 47.      | 73.        |
|               | 2807          | 2/1             | 29        | 7.7       | 3.67     | 4.0       | 90.        | 42.      | 85.        |
|               | 2808          | 2/1             | 29        | 8.3       | 4.07     | 4.2       | 87.        | 59.      | 106.       |
|               | 2809          | 2/1             | 29        | 8.0       | 3.73     | 4.3       | 90.        | 49.      | 99.        |
|               |               |                 | N         | 5         | 5        | 5         | 5          | 5        | 5          |
|               |               |                 | Mean      | 7.7       | 3.63     | 4.1       | 91.        | 48.      | 88.        |
|               |               |                 | Sdev      | 0.46      | 0.309    | 0.20      | 4.9        | 7.2      | 14.6       |
| 200 mg/kg     |               |                 |           |           |          |           |            |          |            |
|               | 2815          | 3/1             | 29        | 7.5       | 3.93     | 3.6       | 97.        | 54.      | 117.       |
|               | 2816          | 3/1             | 29        | 7.7       | 3.39     | 4.3       | 90.        | 36.      | 81.        |
|               | 2817          | 3/1             | 29        | 8.1       | 3.96     | 4.1       | 103.       | 49.      | 97.        |
|               | 2818          | 3/1             | 29        | 7.6       | 3.65     | 4.0       | 98.        | 74.      | 79.        |
|               | 2819          | 3/1             | 29        | 7.1       | 3.53     | 3.6       | 88.        | 48.      | 75.        |
|               |               |                 | N         | 5         | 5        | 5         | 5          | 5        | 5          |
|               |               |                 | Mean      | 7.6       | 3.69     | 3.9       | 95.        | 52.      | 90.        |
|               |               |                 | Sdev      | 0.36      | 0.249    | 0.33      | 6.1        | 13.9     | 17.4       |

TPRO - TOTAL PROTEIN  
GLUC - GLUCOSE

ALB - ALBUMIN  
TG - TRIGLYCERIDES

GLOB - GLOBULIN  
TCHO - TOTAL CHOLESTEROL

CONFIDENTIAL

Appendix 6  
 Day 29 Clinical Chemistry Data  
 Test period

Session 1 (Scheduled)  
 Fexinidazole

Study Number: 0504-2007

| F e m a l e s |               |                 |           |           |          |           |            |          |            |
|---------------|---------------|-----------------|-----------|-----------|----------|-----------|------------|----------|------------|
| Dose Level    | Animal Number | Group/ Subgroup | Study Day | TPRO g/dL | ALB g/dL | GLOB g/dL | GLUC mg/dL | TG mg/dL | TCHO mg/dL |
| 800 mg/kg     |               |                 |           |           |          |           |            |          |            |
|               | 2830          | 4/1             | 29        | 7.7       | 3.61     | 4.1       | 102.       | 47.      | 99.        |
|               | 2831          | 4/1             | 29        | 8.5       | 3.98     | 4.5       | 98.        | 49.      | 134.       |
|               | 2832          | 4/1             | 29        | 8.0       | 3.84     | 4.2       | 104.       | 68.      | 117.       |
|               | 2833          | 4/1             | 29        | 7.9       | 3.66     | 4.2       | 119.       | 29.      | 97.        |
|               | 2834          | 4/1             | 29        | 8.1       | 3.80     | 4.3       | 103.       | 29.      | 85.        |
|               |               |                 | N         | 5         | 5        | 5         | 5          | 5        | 5          |
|               |               |                 | Mean      | 8.0       | 3.78     | 4.3       | 105.       | 44.      | 106.       |
|               |               |                 | Sdev      | 0.30      | 0.148    | 0.16      | 8.0        | 16.3     | 19.2       |

TPRO - TOTAL PROTEIN  
 GLUC - GLUCOSE

ALB - ALBUMIN  
 TG - TRIGLYCERIDES

GLOB - GLOBULIN  
 TCHO - TOTAL CHOLESTEROL



CONFIDENTIAL

Appendix 6  
Day 29 Clinical Chemistry Data  
Test period

Session 1 (Scheduled)  
Fexinidazole

Study Number: 0504-2007

| F e m a l e s |               |                 |           |          |            |      |          |         |          |
|---------------|---------------|-----------------|-----------|----------|------------|------|----------|---------|----------|
| Dose Level    | Animal Number | Group/ Subgroup | Study Day | CA mg/dL | PHOS mg/dL | AG   | NA mEq/L | K mEq/L | CL mEq/L |
| vehicle       |               |                 |           |          |            |      |          |         |          |
|               | 2795          | 1/1             | 29        | 10.7     | 6.3        | 0.9  | 138.0    | 4.4     | 102.0    |
|               | 2796          | 1/1             | 29        | 10.4     | 6.7        | 0.9  | 139.0    | 4.8     | 102.0    |
|               | 2797          | 1/1             | 29        | 10.8     | 6.6        | 0.9  | 140.0    | 4.6     | 102.0    |
|               | 2798          | 1/1             | 29        | 10.3     | 6.5        | 0.8  | 139.0    | 4.7     | 102.0    |
|               | 2799          | 1/1             | 29        | 10.6     | 7.4        | 0.9  | 140.0    | 4.7     | 103.0    |
|               |               |                 | N         | 5        | 5          | 5    | 5        | 5       | 5        |
|               |               |                 | Mean      | 10.6     | 6.7        | 0.9  | 139.2    | 4.7     | 102.2    |
|               |               |                 | Sdev      | 0.21     | 0.42       | 0.05 | 0.84     | 0.14    | 0.45     |
| 50 mg/kg      |               |                 |           |          |            |      |          |         |          |
|               | 2805          | 2/1             | 29        | 10.4     | 6.6        | 0.9  | 139.0    | 4.8     | 101.0    |
|               | 2806          | 2/1             | 29        | 10.0     | 6.3        | 0.8  | 140.0    | 4.5     | 103.0    |
|               | 2807          | 2/1             | 29        | 10.4     | 6.3        | 0.9  | 139.0    | 4.6     | 103.0    |
|               | 2808          | 2/1             | 29        | 11.6     | 7.3        | 1.0  | 143.0    | 5.3     | 104.0    |
|               | 2809          | 2/1             | 29        | 11.0     | 7.0        | 0.9  | 143.0    | 4.6     | 104.0    |
|               |               |                 | N         | 5        | 5          | 5    | 5        | 5       | 5        |
|               |               |                 | Mean      | 10.7     | 6.7        | 0.9  | 140.8    | 4.8     | 103.0    |
|               |               |                 | Sdev      | 0.63     | 0.44       | 0.06 | 2.05     | 0.32    | 1.22     |
| 200 mg/kg     |               |                 |           |          |            |      |          |         |          |
|               | 2815          | 3/1             | 29        | 11.1     | 6.7        | 1.1  | 143.0    | 4.6     | 105.0    |
|               | 2816          | 3/1             | 29        | 10.4     | 6.9        | 0.8  | 142.0    | 5.1     | 105.0    |
|               | 2817          | 3/1             | 29        | 11.4     | 7.6        | 1.0  | 143.0    | 4.7     | 103.0    |
|               | 2818          | 3/1             | 29        | 10.3     | 7.1        | 0.9  | 142.0    | 4.9     | 102.0    |
|               | 2819          | 3/1             | 29        | 10.1     | 8.0        | 1.0  | 142.0    | 4.8     | 103.0    |
|               |               |                 | N         | 5        | 5          | 5    | 5        | 5       | 5        |
|               |               |                 | Mean      | 10.7     | 7.3        | 1.0  | 142.4    | 4.8     | 103.6    |
|               |               |                 | Sdev      | 0.56     | 0.53       | 0.11 | 0.55     | 0.19    | 1.34     |

CA - CALCIUM  
NA - SODIUM

PHOS - PHOSPHOROUS  
K - POTASSIUM

AG - ALBUMIN/GLOBULIN  
CL - CHLORIDE

CONFIDENTIAL

Appendix 6  
 Day 29 Clinical Chemistry Data  
 Test period

Session 1 (Scheduled)  
 Fexinidazole

Study Number: 0504-2007

| F e m a l e s |               |                 |           |          |            |      |          |         |          |
|---------------|---------------|-----------------|-----------|----------|------------|------|----------|---------|----------|
| Dose Level    | Animal Number | Group/ Subgroup | Study Day | CA mg/dL | PHOS mg/dL | AG   | NA mEq/L | K mEq/L | CL mEq/L |
| 800 mg/kg     |               |                 |           |          |            |      |          |         |          |
|               | 2830          | 4/1             | 29        | 11.2     | 6.0        | 0.9  | 142.0    | 4.7     | 105.0    |
|               | 2831          | 4/1             | 29        | 11.8     | 6.7        | 0.9  | 145.0    | 5.0     | 104.0    |
|               | 2832          | 4/1             | 29        | 11.5     | 7.2        | 0.9  | 143.0    | 5.2     | 104.0    |
|               | 2833          | 4/1             | 29        | 11.1     | 6.9        | 0.9  | 142.0    | 5.0     | 104.0    |
|               | 2834          | 4/1             | 29        | 10.9     | 6.1        | 0.9  | 144.0    | 4.8     | 106.0    |
|               |               |                 | N         | 5        | 5          | 5    | 5        | 5       | 5        |
|               |               |                 | Mean      | 11.3     | 6.6        | 0.9  | 143.2    | 4.9     | 104.6    |
|               |               |                 | Sdev      | 0.35     | 0.52       | 0.02 | 1.30     | 0.20    | 0.89     |

CA - CALCIUM  
 NA - SODIUM

PHOS - PHOSPHOROUS  
 K - POTASSIUM

AG - ALBUMIN/GLOBULIN  
 CL - CHLORIDE

CONFIDENTIAL

Appendix 6  
 Day 43 Clinical Chemistry Data  
 Test period

Session 1 (Scheduled)  
 Fexinidazole

Study Number: 0504-2007

| M a l e s  |               |                 |           |            |            |          |          |         |          |            |
|------------|---------------|-----------------|-----------|------------|------------|----------|----------|---------|----------|------------|
| Dose Level | Animal Number | Group/ Subgroup | Study Day | UREA mg/dL | CREA mg/dL | AST IU/L | ALT IU/L | AP IU/L | GGT IU/L | TBIL mg/dL |
| vehicle    |               |                 |           |            |            |          |          |         |          |            |
|            | 2745          | 1/1             | 43        | 28.        | 0.70       | 134.     | 28.      | 137.    | NT       | 0.08       |
|            | 2746          | 1/1             | 43        | 33.        | 0.65       | 140.     | 36.      | 148.    | 6.       | 0.09       |
|            | 2747          | 1/1             | 43        | 27.        | 0.68       | 141.     | 34.      | 115.    | NT       | 0.08       |
|            | 2748          | 1/1             | 43        | 32.        | 0.67       | 145.     | 37.      | 152.    | 4.       | 0.05       |
|            | 2749          | 1/1             | 43        | 30.        | 0.68       | 184.     | 29.      | 175.    | 7.       | 0.08       |
|            |               |                 | N         | 5          | 5          | 5        | 5        | 5       | 3        | 5          |
|            |               |                 | Mean      | 30.        | 0.68       | 149.     | 33.      | 145.    | 6.       | 0.08       |
|            |               |                 | Sdev      | 2.5        | 0.018      | 20.1     | 4.1      | 21.9    | 1.5      | 0.015      |
| 800 mg/kg  |               |                 |           |            |            |          |          |         |          |            |
|            | 2780          | 4/1             | 43        | 30.        | 0.69       | 128.     | 29.      | 133.    | NT       | 0.08       |
|            | 2781          | 4/1             | 43        | 32.        | 0.70       | 176.     | 35.      | 101.    | NT       | 0.08       |
|            | 2782          | 4/1             | 43        | 34.        | 0.64       | 116.     | 35.      | 122.    | NT       | NT         |
|            | 2783          | 4/1             | 43        | 30.        | 0.68       | 136.     | 25.      | 99.     | NT       | 0.11       |
|            | 2784          | 4/1             | 43        | 35.        | 0.63       | 122.     | 35.      | 135.    | NT       | 0.09       |
|            |               |                 | N         | 5          | 5          | 5        | 5        | 5       | 0        | 4          |
|            |               |                 | Mean      | 32.        | 0.67       | 136.     | 32.      | 118.    | -        | 0.09       |
|            |               |                 | Sdev      | 2.3        | 0.031      | 23.8     | 4.6      | 17.2    | -        | 0.014      |

UREA - UREA  
 ALT - ALANINE AMINO TRANSFERASE  
 TBIL - TOTAL BILIRUBIN

CREA - CREATININE  
 AP - ALKALINE PHOSPHATASE

AST - ASPARTATE AMINO TRANSFERASE  
 GGT - GAMMA GLUTAMYL TRANSFERASE

CONFIDENTIAL

Appendix 6  
 Day 43 Clinical Chemistry Data  
 Test period

Session 1 (Scheduled)  
 Fexinidazole

Study Number: 0504-2007

| M a l e s  |               |                 |           |           |          |           |            |          |            |
|------------|---------------|-----------------|-----------|-----------|----------|-----------|------------|----------|------------|
| Dose Level | Animal Number | Group/ Subgroup | Study Day | TPRO g/dL | ALB g/dL | GLOB g/dL | GLUC mg/dL | TG mg/dL | TCHO mg/dL |
| vehicle    |               |                 |           |           |          |           |            |          |            |
|            | 2745          | 1/1             | 43        | 7.1       | 3.06     | 4.0       | 95.        | 45.      | 52.        |
|            | 2746          | 1/1             | 43        | 6.6       | 3.03     | 3.6       | 85.        | 33.      | 49.        |
|            | 2747          | 1/1             | 43        | 7.2       | 3.12     | 4.1       | 95.        | 57.      | 52.        |
|            | 2748          | 1/1             | 43        | 6.8       | 2.99     | 3.8       | 87.        | 77.      | 58.        |
|            | 2749          | 1/1             | 43        | 6.9       | 3.13     | 3.8       | 95.        | 51.      | 42.        |
|            |               |                 | N         | 5         | 5        | 5         | 5          | 5        | 5          |
|            |               |                 | Mean      | 6.9       | 3.07     | 3.9       | 91.        | 53.      | 51.        |
|            |               |                 | Sdev      | 0.24      | 0.059    | 0.21      | 5.0        | 16.3     | 5.8        |
| 800 mg/kg  |               |                 |           |           |          |           |            |          |            |
|            | 2780          | 4/1             | 43        | 6.9       | 3.11     | 3.8       | 89.        | 53.      | 79.        |
|            | 2781          | 4/1             | 43        | 6.9       | 3.05     | 3.9       | 79.        | 53.      | 54.        |
|            | 2782          | 4/1             | 43        | 6.9       | 3.14     | 3.8       | 80.        | 43.      | 50.        |
|            | 2783          | 4/1             | 43        | 7.2       | 3.11     | 4.1       | 87.        | 90.      | 70.        |
|            | 2784          | 4/1             | 43        | 7.3       | 3.13     | 4.2       | 81.        | 62.      | 47.        |
|            |               |                 | N         | 5         | 5        | 5         | 5          | 5        | 5          |
|            |               |                 | Mean      | 7.0       | 3.11     | 3.9       | 83.        | 60.      | 60.        |
|            |               |                 | Sdev      | 0.19      | 0.035    | 0.19      | 4.5        | 18.0     | 13.8       |

TPRO - TOTAL PROTEIN  
 GLUC - GLUCOSE

ALB - ALBUMIN  
 TG - TRIGLYCERIDES

GLOB - GLOBULIN  
 TCHO - TOTAL CHOLESTEROL

CONFIDENTIAL

Appendix 6  
Day 43 Clinical Chemistry Data  
Test period

Session 1 (Scheduled)  
Fexinidazole

Study Number: 0504-2007

| M a l e s  |               |                 |           |          |            |      |          |         |          |
|------------|---------------|-----------------|-----------|----------|------------|------|----------|---------|----------|
| Dose Level | Animal Number | Group/ Subgroup | Study Day | CA mg/dL | PHOS mg/dL | AG   | NA mEq/L | K mEq/L | CL mEq/L |
| vehicle    |               |                 |           |          |            |      |          |         |          |
|            | 2745          | 1/1             | 43        | 10.3     | 7.5        | 0.8  | 138.0    | 4.6     | 102.0    |
|            | 2746          | 1/1             | 43        | 10.1     | 8.5        | 0.8  | 139.0    | 4.8     | 101.0    |
|            | 2747          | 1/1             | 43        | 10.4     | 7.8        | 0.8  | 139.0    | 5.1     | 102.0    |
|            | 2748          | 1/1             | 43        | 10.5     | 8.7        | 0.8  | 139.0    | 5.2     | 101.0    |
|            | 2749          | 1/1             | 43        | 10.4     | 8.2        | 0.8  | 140.0    | 5.3     | 103.0    |
|            |               |                 | N         | 5        | 5          | 5    | 5        | 5       | 5        |
|            |               |                 | Mean      | 10.3     | 8.1        | 0.8  | 139.0    | 5.0     | 101.8    |
|            |               |                 | Sdev      | 0.15     | 0.49       | 0.04 | 0.71     | 0.31    | 0.84     |
| 800 mg/kg  |               |                 |           |          |            |      |          |         |          |
|            | 2780          | 4/1             | 43        | 10.2     | 7.8        | 0.8  | 141.0    | 5.1     | 102.0    |
|            | 2781          | 4/1             | 43        | 10.3     | 7.9        | 0.8  | 140.0    | 5.1     | 102.0    |
|            | 2782          | 4/1             | 43        | 10.3     | 8.2        | 0.8  | 140.0    | 5.0     | 104.0    |
|            | 2783          | 4/1             | 43        | 10.8     | 9.8        | 0.8  | 142.0    | 5.0     | 103.0    |
|            | 2784          | 4/1             | 43        | 10.3     | 9.0        | 0.8  | 141.0    | 4.9     | 102.0    |
|            |               |                 | N         | 5        | 5          | 5    | 5        | 5       | 5        |
|            |               |                 | Mean      | 10.4     | 8.5        | 0.8  | 140.8    | 5.0     | 102.6    |
|            |               |                 | Sdev      | 0.24     | 0.85       | 0.04 | 0.84     | 0.10    | 0.89     |

CA - CALCIUM  
NA - SODIUM

PHOS - PHOSPHOROUS  
K - POTASSIUM

AG - ALBUMIN/GLOBULIN  
CL - CHLORIDE

CONFIDENTIAL

Appendix 6  
 Day 43 Clinical Chemistry Data  
 Test period

Session 1 (Scheduled)  
 Fexinidazole

Study Number: 0504-2007

| F e m a l e s |               |                 |           |            |            |          |          |         |          |            |
|---------------|---------------|-----------------|-----------|------------|------------|----------|----------|---------|----------|------------|
| Dose Level    | Animal Number | Group/ Subgroup | Study Day | UREA mg/dL | CREA mg/dL | AST IU/L | ALT IU/L | AP IU/L | GGT IU/L | TBIL mg/dL |
| vehicle       |               |                 |           |            |            |          |          |         |          |            |
|               | 2795          | 1/1             | 43        | 36.        | 0.62       | 128.     | 41.      | 106.    | 6.       | 0.10       |
|               | 2796          | 1/1             | 43        | 35.        | 0.64       | 140.     | 30.      | 89.     | NT       | 0.08       |
|               | 2797          | 1/1             | 43        | 35.        | 0.70       | 110.     | 30.      | 65.     | 4.       | 0.11       |
|               | 2798          | 1/1             | 43        | 34.        | 0.63       | 180.     | 36.      | 95.     | NT       | 0.08       |
|               | 2799          | 1/1             | 43        | 43.        | 0.72       | 120.     | 22.      | 79.     | NT       | 0.10       |
|               |               |                 | N         | 5          | 5          | 5        | 5        | 5       | 2        | 5          |
|               |               |                 | Mean      | 37.        | 0.66       | 136.     | 32.      | 87.     | 5.       | 0.09       |
|               |               |                 | Sdev      | 3.6        | 0.045      | 27.1     | 7.2      | 15.6    | 1.4      | 0.013      |
| 800 mg/kg     |               |                 |           |            |            |          |          |         |          |            |
|               | 2830          | 4/1             | 43        | 30.        | 0.64       | 135.     | 33.      | 56.     | NT       | 0.09       |
|               | 2831          | 4/1             | 43        | 40.        | 0.69       | 123.     | 28.      | 56.     | NT       | 0.09       |
|               | 2832          | 4/1             | 43        | 35.        | 0.76       | 168.     | 25.      | 66.     | 7.       | 0.08       |
|               | 2833          | 4/1             | 43        | 42.        | 0.73       | 166.     | 28.      | 79.     | NT       | 0.13       |
|               | 2834          | 4/1             | 43        | 47.        | 0.69       | 118.     | 27.      | 46.     | NT       | 0.11       |
|               |               |                 | N         | 5          | 5          | 5        | 5        | 5       | 1        | 5          |
|               |               |                 | Mean      | 39.        | 0.70       | 142.     | 28.      | 61.     | 7.       | 0.10       |
|               |               |                 | Sdev      | 6.5        | 0.045      | 23.7     | 2.9      | 12.5    | -        | 0.020      |

UREA - UREA  
 ALT - ALANINE AMINO TRANSFERASE  
 TBIL - TOTAL BILIRUBIN

CREA - CREATININE  
 AP - ALKALINE PHOSPHATASE

AST - ASPARTATE AMINO TRANSFERASE  
 GGT - GAMMA GLUTAMYL TRANSFERASE

CONFIDENTIAL

Appendix 6  
Day 43 Clinical Chemistry Data  
Test period

Session 1 (Scheduled)  
Fexinidazole

Study Number: 0504-2007

| F e m a l e s |               |                 |           |           |          |           |            |          |            |
|---------------|---------------|-----------------|-----------|-----------|----------|-----------|------------|----------|------------|
| Dose Level    | Animal Number | Group/ Subgroup | Study Day | TPRO g/dL | ALB g/dL | GLOB g/dL | GLUC mg/dL | TG mg/dL | TCHO mg/dL |
| vehicle       |               |                 |           |           |          |           |            |          |            |
|               | 2795          | 1/1             | 43        | 7.6       | 3.64     | 4.0       | 115.       | 29.      | 63.        |
|               | 2796          | 1/1             | 43        | 7.1       | 3.45     | 3.7       | 100.       | 33.      | 80.        |
|               | 2797          | 1/1             | 43        | 7.7       | 3.81     | 3.9       | 105.       | 49.      | 64.        |
|               | 2798          | 1/1             | 43        | 7.3       | 3.32     | 4.0       | 110.       | 35.      | 59.        |
|               | 2799          | 1/1             | 43        | 7.6       | 3.59     | 4.0       | 95.        | 47.      | 93.        |
|               |               |                 | N         | 5         | 5        | 5         | 5          | 5        | 5          |
|               |               |                 | Mean      | 7.5       | 3.56     | 3.9       | 105.       | 39.      | 72.        |
|               |               |                 | Sdev      | 0.25      | 0.187    | 0.15      | 7.9        | 8.9      | 14.3       |
| 800 mg/kg     |               |                 |           |           |          |           |            |          |            |
|               | 2830          | 4/1             | 43        | 7.3       | 3.28     | 4.0       | 99.        | 40.      | 68.        |
|               | 2831          | 4/1             | 43        | 7.8       | 3.80     | 4.0       | 95.        | 41.      | 90.        |
|               | 2832          | 4/1             | 43        | 7.6       | 3.69     | 3.9       | 108.       | 41.      | 98.        |
|               | 2833          | 4/1             | 43        | 7.9       | 3.72     | 4.2       | 112.       | 50.      | 97.        |
|               | 2834          | 4/1             | 43        | 7.7       | 3.84     | 3.9       | 105.       | 40.      | 83.        |
|               |               |                 | N         | 5         | 5        | 5         | 5          | 5        | 5          |
|               |               |                 | Mean      | 7.7       | 3.67     | 4.0       | 104.       | 42.      | 87.        |
|               |               |                 | Sdev      | 0.23      | 0.224    | 0.12      | 6.8        | 4.3      | 12.3       |

TPRO - TOTAL PROTEIN  
GLUC - GLUCOSE

ALB - ALBUMIN  
TG - TRIGLYCERIDES

GLOB - GLOBULIN  
TCHO - TOTAL CHOLESTEROL

CONFIDENTIAL

Appendix 6  
 Day 43 Clinical Chemistry Data  
 Test period

Session 1 (Scheduled)  
 Fexinidazole

Study Number: 0504-2007

| F e m a l e s |               |                 |           |          |            |      |          |         |          |
|---------------|---------------|-----------------|-----------|----------|------------|------|----------|---------|----------|
| Dose Level    | Animal Number | Group/ Subgroup | Study Day | CA mg/dL | PHOS mg/dL | AG   | NA mEq/L | K mEq/L | CL mEq/L |
| vehicle       |               |                 |           |          |            |      |          |         |          |
|               | 2795          | 1/1             | 43        | 10.8     | 6.2        | 0.9  | 142.0    | 4.7     | 103.0    |
|               | 2796          | 1/1             | 43        | 10.5     | 6.5        | 0.9  | 144.0    | 5.0     | 105.0    |
|               | 2797          | 1/1             | 43        | 10.8     | 6.0        | 1.0  | 143.0    | 4.6     | 104.0    |
|               | 2798          | 1/1             | 43        | 10.7     | 6.7        | 0.8  | 142.0    | 5.1     | 105.0    |
|               | 2799          | 1/1             | 43        | 10.9     | 7.2        | 0.9  | 144.0    | 4.7     | 105.0    |
|               |               |                 | N         | 5        | 5          | 5    | 5        | 5       | 5        |
|               |               |                 | Mean      | 10.7     | 6.5        | 0.9  | 143.0    | 4.8     | 104.4    |
|               |               |                 | Sdev      | 0.15     | 0.47       | 0.05 | 1.00     | 0.24    | 0.89     |
| 800 mg/kg     |               |                 |           |          |            |      |          |         |          |
|               | 2830          | 4/1             | 43        | 10.5     | 6.5        | 0.8  | 141.0    | 4.8     | 104.0    |
|               | 2831          | 4/1             | 43        | 11.1     | 7.0        | 1.0  | 144.0    | 4.8     | 105.0    |
|               | 2832          | 4/1             | 43        | 11.1     | 5.6        | 0.9  | 142.0    | 5.0     | 104.0    |
|               | 2833          | 4/1             | 43        | 11.5     | 6.9        | 0.9  | 144.0    | 5.3     | 104.0    |
|               | 2834          | 4/1             | 43        | 11.2     | 6.9        | 1.0  | 145.0    | 4.7     | 106.0    |
|               |               |                 | N         | 5        | 5          | 5    | 5        | 5       | 5        |
|               |               |                 | Mean      | 11.1     | 6.6        | 0.9  | 143.2    | 4.9     | 104.6    |
|               |               |                 | Sdev      | 0.36     | 0.58       | 0.07 | 1.64     | 0.24    | 0.89     |

CA - CALCIUM  
 NA - SODIUM

PHOS - PHOSPHOROUS  
 K - POTASSIUM

AG - ALBUMIN/GLOBULIN  
 CL - CHLORIDE



## ***Appendix 7 Urine Analysis***

CONFIDENTIAL

Appendix 7  
Day 29 Urine Data  
Test period

Session 1 (Scheduled)  
Fexinidazole

Study Number: 0504-2007

| M a l e s  |               |                 |           |          |           |           |           |           |           |           |
|------------|---------------|-----------------|-----------|----------|-----------|-----------|-----------|-----------|-----------|-----------|
| Dose Level | Animal Number | Group/ Subgroup | Study Day | PH UNITS | WBC SCORE | NIT SCORE | PRO SCORE | GLU SCORE | KET SCORE | UBG SCORE |
| vehicle    |               |                 |           |          |           |           |           |           |           |           |
|            | 2745          | 1/1             | 29        | 7.0      | 0.        | 0.        | 1.        | 0.        | 1.        | 0.        |
|            | 2746          | 1/1             | 29        | 7.0      | 0.        | 0.        | 0.        | 0.        | 0.        | 0.        |
|            | 2747          | 1/1             | 29        | 7.0      | 0.        | 0.        | 1.        | 0.        | 0.        | 0.        |
|            | 2748          | 1/1             | 29        | 7.0      | 0.        | 0.        | 1.        | 0.        | 0.        | 0.        |
|            | 2749          | 1/1             | 29        | 7.0      | 0.        | 0.        | 0.        | 0.        | 0.        | 0.        |
|            |               |                 | N         | 5        | 5         | 5         | 5         | 5         | 5         | 5         |
|            |               |                 | Mean      | 7.0      | 0.        | 0.        | 1.        | 0.        | 0.        | 0.        |
|            |               |                 | Sdev      | 0.00     | 0.0       | 0.0       | 0.5       | 0.0       | 0.4       | 0.0       |
| 50 mg/kg   |               |                 |           |          |           |           |           |           |           |           |
|            | 2755          | 2/1             | 29        | 7.0      | 0.        | 0.        | 1.        | 0.        | 1.        | 0.        |
|            | 2756          | 2/1             | 29        | 7.0      | 0.        | 1.        | 1.        | 0.        | 1.        | 0.        |
|            | 2757          | 2/1             | 29        | 7.0      | 1.        | 0.        | 1.        | 0.        | 0.        | 0.        |
|            | 2758          | 2/1             | 29        | 7.0      | 0.        | 0.        | 1.        | 0.        | 0.        | 0.        |
|            | 2759          | 2/1             | 29        | 7.0      | 0.        | 0.        | 1.        | 0.        | 0.        | 0.        |
|            |               |                 | N         | 5        | 5         | 5         | 5         | 5         | 5         | 5         |
|            |               |                 | Mean      | 7.0      | 0.        | 0.        | 1.        | 0.        | 0.        | 0.        |
|            |               |                 | Sdev      | 0.00     | 0.4       | 0.4       | 0.0       | 0.0       | 0.5       | 0.0       |
| 200 mg/kg  |               |                 |           |          |           |           |           |           |           |           |
|            | 2765          | 3/1             | 29        | 7.0      | 0.        | 0.        | 1.        | 0.        | 1.        | 0.        |
|            | 2766          | 3/1             | 29        | 7.0      | 0.        | 0.        | 1.        | 0.        | 0.        | 0.        |
|            | 2767          | 3/1             | 29        | 7.0      | 0.        | 0.        | 1.        | 0.        | 1.        | 0.        |
|            | 2768          | 3/1             | 29        | 7.0      | 0.        | 0.        | 1.        | 0.        | 0.        | 0.        |
|            | 2769          | 3/1             | 29        | 7.0      | 0.        | 1.        | 1.        | 0.        | 1.        | 0.        |
|            |               |                 | N         | 5        | 5         | 5         | 5         | 5         | 5         | 5         |
|            |               |                 | Mean      | 7.0      | 0.        | 0.        | 1.        | 0.        | 1.        | 0.        |
|            |               |                 | Sdev      | 0.00     | 0.0       | 0.4       | 0.0       | 0.0       | 0.5       | 0.0       |

PH - PH  
PRO - PROTEINS  
UBG - UROBILINOGEN

WBC - WHITE BLOOD CELLS  
GLU - GLUCOSE

NIT - NITRITES  
KET - KETONE BODIES

CONFIDENTIAL

Appendix 7  
Day 29 Urine Data  
Test period

Session 1 (Scheduled)  
Fexinidazole

Study Number: 0504-2007

| M a l e s  |               |                 |           |          |           |           |           |           |           |           |
|------------|---------------|-----------------|-----------|----------|-----------|-----------|-----------|-----------|-----------|-----------|
| Dose Level | Animal Number | Group/ Subgroup | Study Day | PH UNITS | WBC SCORE | NIT SCORE | PRO SCORE | GLU SCORE | KET SCORE | UBG SCORE |
| 800 mg/kg  |               |                 |           |          |           |           |           |           |           |           |
|            | 2780          | 4/1             | 29        | 7.0      | 1.        | 1.        | 1.        | 0.        | 1.        | 0.        |
|            | 2781          | 4/1             | 29        | 7.0      | 1.        | 1.        | 1.        | 0.        | 0.        | 0.        |
|            | 2782          | 4/1             | 29        | 7.0      | 1.        | 0.        | 1.        | 0.        | 1.        | 0.        |
|            | 2783          | 4/1             | 29        | 7.0      | 1.        | 0.        | 1.        | 0.        | 1.        | 0.        |
|            | 2784          | 4/1             | 29        | 7.0      | 0.        | 1.        | 1.        | 0.        | 0.        | 0.        |
|            |               |                 | N         | 5        | 5         | 5         | 5         | 5         | 5         | 5         |
|            |               |                 | Mean      | 7.0      | 1.        | 1.        | 1.        | 0.        | 1.        | 0.        |
|            |               |                 | Sdev      | 0.00     | 0.4       | 0.5       | 0.0       | 0.0       | 0.5       | 0.0       |

PH - PH  
PRO - PROTEINS  
UBG - UROBILINOGEN

WBC - WHITE BLOOD CELLS  
GLU - GLUCOSE

NIT - NITRITES  
KET - KETONE BODIES

CONFIDENTIAL

Appendix 7  
Day 29 Urine Data  
Test period

Session 1 (Scheduled)  
Fexinidazole

Study Number: 0504-2007

| M a l e s  |               |                 |           |           |           |        |     |     |        |
|------------|---------------|-----------------|-----------|-----------|-----------|--------|-----|-----|--------|
| Dose Level | Animal Number | Group/ Subgroup | Study Day | BIL SCORE | RBC SCORE | SG     | COL | APP | VOL mL |
| vehicle    |               |                 |           |           |           |        |     |     |        |
|            | 2745          | 1/1             | 29        | 0.        | 1.        | 1.026  | Y   | LT  | 10.0   |
|            | 2746          | 1/1             | 29        | 0.        | 1.        | 1.018  | Y   | LT  | 8.0    |
|            | 2747          | 1/1             | 29        | 0.        | 1.        | 1.018  | Y   | L   | 12.0   |
|            | 2748          | 1/1             | 29        | 0.        | 0.        | 1.018  | Y   | L   | 12.0   |
|            | 2749          | 1/1             | 29        | 0.        | 0.        | 1.018  | Y   | L   | 11.0   |
|            |               |                 | N         | 5         | 5         | 5      | 0   | 0   | 5      |
|            |               |                 | Mean      | 0.        | 1.        | 1.020  | -   | -   | 10.6   |
|            |               |                 | Sdev      | 0.0       | 0.5       | 0.0036 | -   | -   | 1.67   |
| 50 mg/kg   |               |                 |           |           |           |        |     |     |        |
|            | 2755          | 2/1             | 29        | 0.        | 0.        | 1.022  | W   | L   | 11.0   |
|            | 2756          | 2/1             | 29        | 0.        | 0.        | 1.022  | Y   | L   | 12.0   |
|            | 2757          | 2/1             | 29        | 0.        | 0.        | 1.020  | Y   | L   | 12.0   |
|            | 2758          | 2/1             | 29        | 0.        | 0.        | 1.020  | Y   | L   | 13.0   |
|            | 2759          | 2/1             | 29        | 0.        | 0.        | 1.017  | W   | L   | 14.0   |
|            |               |                 | N         | 5         | 5         | 5      | 0   | 0   | 5      |
|            |               |                 | Mean      | 0.        | 0.        | 1.020  | -   | -   | 12.4   |
|            |               |                 | Sdev      | 0.0       | 0.0       | 0.0020 | -   | -   | 1.14   |
| 200 mg/kg  |               |                 |           |           |           |        |     |     |        |
|            | 2765          | 3/1             | 29        | 0.        | 0.        | 1.020  | Y   | L   | 11.0   |
|            | 2766          | 3/1             | 29        | 0.        | 0.        | 1.020  | Y   | L   | 12.0   |
|            | 2767          | 3/1             | 29        | 0.        | 1.        | 1.021  | Y   | LT  | 9.0    |
|            | 2768          | 3/1             | 29        | 0.        | 0.        | 1.019  | Y   | L   | 17.0   |
|            | 2769          | 3/1             | 29        | 0.        | 0.        | 1.018  | Y   | L   | 12.0   |
|            |               |                 | N         | 5         | 5         | 5      | 0   | 0   | 5      |
|            |               |                 | Mean      | 0.        | 0.        | 1.020  | -   | -   | 12.2   |
|            |               |                 | Sdev      | 0.0       | 0.4       | 0.0011 | -   | -   | 2.95   |

BIL - BILIRUBIN  
COL - COLOUR

RBC - HEMOGLOBIN/RED BLOOD CELLS  
APP - APPEARANCE

SG - SPECIFIC GRAVITY  
VOL - URINARY VOLUME

CONFIDENTIAL

Appendix 7  
Day 29 Urine Data  
Test period

Session 1 (Scheduled)  
Fexinidazole

Study Number: 0504-2007

| M a l e s  |               |                 |           |           |           |        |     |     |        |
|------------|---------------|-----------------|-----------|-----------|-----------|--------|-----|-----|--------|
| Dose Level | Animal Number | Group/ Subgroup | Study Day | BIL SCORE | RBC SCORE | SG     | COL | APP | VOL mL |
| 800 mg/kg  |               |                 |           |           |           |        |     |     |        |
|            | 2780          | 4/1             | 29        | 0.        | 0.        | 1.021  | Y   | L   | 8.0    |
|            | 2781          | 4/1             | 29        | 0.        | 0.        | 1.023  | Y   | L   | 12.0   |
|            | 2782          | 4/1             | 29        | 0.        | 1.        | 1.020  | Y   | L   | 11.0   |
|            | 2783          | 4/1             | 29        | 0.        | 0.        | 1.020  | Y   | L   | 14.0   |
|            | 2784          | 4/1             | 29        | 0.        | 0.        | 1.020  | Y   | L   | 12.0   |
|            |               |                 | N         | 5         | 5         | 5      | 0   | 0   | 5      |
|            |               |                 | Mean      | 0.        | 0.        | 1.021  | -   | -   | 11.4   |
|            |               |                 | Sdev      | 0.0       | 0.4       | 0.0013 | -   | -   | 2.19   |

BIL - BILIRUBIN  
COL - COLOUR

RBC - HEMOGLOBIN/RED BLOOD CELLS  
APP - APPEARANCE

SG - SPECIFIC GRAVITY  
VOL - URINARY VOLUME

CONFIDENTIAL

Appendix 7  
Day 29 Urine Data  
Test period

Session 1 (Scheduled)  
Fexinidazole

Study Number: 0504-2007

| F e m a l e s |               |                 |           |          |           |           |           |           |           |           |
|---------------|---------------|-----------------|-----------|----------|-----------|-----------|-----------|-----------|-----------|-----------|
| Dose Level    | Animal Number | Group/ Subgroup | Study Day | PH UNITS | WBC SCORE | NIT SCORE | PRO SCORE | GLU SCORE | KET SCORE | UBG SCORE |
| vehicle       |               |                 |           |          |           |           |           |           |           |           |
|               | 2795          | 1/1             | 29        | 6.5      | 0.        | 0.        | 0.        | 0.        | 0.        | 0.        |
|               | 2796          | 1/1             | 29        | 7.0      | 0.        | 0.        | 1.        | 0.        | 0.        | 0.        |
|               | 2797          | 1/1             | 29        | 7.0      | 0.        | 0.        | 0.        | 0.        | 0.        | 0.        |
|               | 2798          | 1/1             | 29        | 7.0      | 0.        | 0.        | 0.        | 0.        | 0.        | 0.        |
|               | 2799          | 1/1             | 29        | 7.0      | 0.        | 0.        | 0.        | 0.        | 0.        | 0.        |
|               |               |                 | N         | 5        | 5         | 5         | 5         | 5         | 5         | 5         |
|               |               |                 | Mean      | 6.9      | 0.        | 0.        | 0.        | 0.        | 0.        | 0.        |
|               |               |                 | Sdev      | 0.22     | 0.0       | 0.0       | 0.4       | 0.0       | 0.0       | 0.0       |
| 50 mg/kg      |               |                 |           |          |           |           |           |           |           |           |
|               | 2805          | 2/1             | 29        | 7.0      | 0.        | 0.        | 0.        | 0.        | 0.        | 0.        |
|               | 2806          | 2/1             | 29        | 7.0      | 0.        | 0.        | 0.        | 0.        | 0.        | 0.        |
|               | 2807          | 2/1             | 29        | 7.0      | 0.        | 0.        | 0.        | 0.        | 0.        | 0.        |
|               | 2808          | 2/1             | 29        | 7.0      | 0.        | 0.        | 0.        | 0.        | 0.        | 0.        |
|               | 2809          | 2/1             | 29        | 7.0      | 0.        | 0.        | 1.        | 0.        | 0.        | 0.        |
|               |               |                 | N         | 5        | 5         | 5         | 5         | 5         | 5         | 5         |
|               |               |                 | Mean      | 7.0      | 0.        | 0.        | 0.        | 0.        | 0.        | 0.        |
|               |               |                 | Sdev      | 0.00     | 0.0       | 0.0       | 0.4       | 0.0       | 0.0       | 0.0       |
| 200 mg/kg     |               |                 |           |          |           |           |           |           |           |           |
|               | 2815          | 3/1             | 29        | 7.0      | 0.        | 0.        | 1.        | 0.        | 0.        | 0.        |
|               | 2816          | 3/1             | 29        | 7.0      | 0.        | 0.        | 1.        | 0.        | 0.        | 0.        |
|               | 2817          | 3/1             | 29        | 7.0      | 0.        | 0.        | 1.        | 0.        | 0.        | 0.        |
|               | 2818          | 3/1             | 29        | 7.0      | 0.        | 0.        | 0.        | 0.        | 0.        | 0.        |
|               | 2819          | 3/1             | 29        | 7.0      | 0.        | 0.        | 1.        | 0.        | 0.        | 0.        |
|               |               |                 | N         | 5        | 5         | 5         | 5         | 5         | 5         | 5         |
|               |               |                 | Mean      | 7.0      | 0.        | 0.        | 1.        | 0.        | 0.        | 0.        |
|               |               |                 | Sdev      | 0.00     | 0.0       | 0.0       | 0.4       | 0.0       | 0.0       | 0.0       |

PH - PH  
PRO - PROTEINS  
UBG - UROBILINOGEN

WBC - WHITE BLOOD CELLS  
GLU - GLUCOSE

NIT - NITRITES  
KET - KETONE BODIES

CONFIDENTIAL

Appendix 7  
Day 29 Urine Data  
Test period

Session 1 (Scheduled)  
Fexinidazole

Study Number: 0504-2007

| F e m a l e s |               |                 |           |          |           |           |           |           |           |           |
|---------------|---------------|-----------------|-----------|----------|-----------|-----------|-----------|-----------|-----------|-----------|
| Dose Level    | Animal Number | Group/ Subgroup | Study Day | PH UNITS | WBC SCORE | NIT SCORE | PRO SCORE | GLU SCORE | KET SCORE | UBG SCORE |
| 800 mg/kg     |               |                 |           |          |           |           |           |           |           |           |
|               | 2830          | 4/1             | 29        | 7.0      | 0.        | 0.        | 0.        | 0.        | 0.        | 0.        |
|               | 2831          | 4/1             | 29        | 7.0      | 0.        | 1.        | 1.        | 0.        | 0.        | 0.        |
|               | 2832          | 4/1             | 29        | 7.0      | 0.        | 1.        | 0.        | 0.        | 0.        | 0.        |
|               | 2833          | 4/1             | 29        | 7.0      | 0.        | 0.        | 0.        | 0.        | 0.        | 0.        |
|               | 2834          | 4/1             | 29        | 7.0      | 0.        | 0.        | 0.        | 0.        | 0.        | 0.        |
|               |               |                 | N         | 5        | 5         | 5         | 5         | 5         | 5         | 5         |
|               |               |                 | Mean      | 7.0      | 0.        | 0.        | 0.        | 0.        | 0.        | 0.        |
|               |               |                 | Sdev      | 0.00     | 0.0       | 0.5       | 0.4       | 0.0       | 0.0       | 0.0       |

PH - PH  
PRO - PROTEINS  
UBG - UROBILINOGEN

WBC - WHITE BLOOD CELLS  
GLU - GLUCOSE

NIT - NITRITES  
KET - KETONE BODIES

CONFIDENTIAL

Appendix 7  
Day 29 Urine Data  
Test period

Session 1 (Scheduled)  
Fexinidazole

Study Number: 0504-2007

| F e m a l e s |               |                 |           |           |           |        |     |     |        |
|---------------|---------------|-----------------|-----------|-----------|-----------|--------|-----|-----|--------|
| Dose Level    | Animal Number | Group/ Subgroup | Study Day | BIL SCORE | RBC SCORE | SG     | COL | APP | VOL mL |
| vehicle       |               |                 |           |           |           |        |     |     |        |
|               | 2795          | 1/1             | 29        | 0.        | 0.        | 1.020  | Y   | L   | 8.0    |
|               | 2796          | 1/1             | 29        | 0.        | 0.        | 1.025  | Y   | L   | 6.0    |
|               | 2797          | 1/1             | 29        | 0.        | 0.        | 1.020  | Y   | L   | 10.0   |
|               | 2798          | 1/1             | 29        | 0.        | 1.        | 1.019  | W   | L   | 11.0   |
|               | 2799          | 1/1             | 29        | 0.        | 0.        | 1.015  | Y   | L   | 8.0    |
|               |               |                 | N         | 5         | 5         | 5      | 0   | 0   | 5      |
|               |               |                 | Mean      | 0.        | 0.        | 1.020  | -   | -   | 8.6    |
|               |               |                 | Sdev      | 0.0       | 0.4       | 0.0036 | -   | -   | 1.95   |
| 50 mg/kg      |               |                 |           |           |           |        |     |     |        |
|               | 2805          | 2/1             | 29        | 0.        | 0.        | 1.019  | Y   | L   | 9.0    |
|               | 2806          | 2/1             | 29        | 0.        | 0.        | 1.016  | Y   | L   | 9.0    |
|               | 2807          | 2/1             | 29        | 0.        | 0.        | 1.021  | Y   | L   | 9.0    |
|               | 2808          | 2/1             | 29        | 0.        | 1.        | 1.015  | Y   | L   | 6.0    |
|               | 2809          | 2/1             | 29        | 0.        | 0.        | 1.022  | Y   | L   | 7.0    |
|               |               |                 | N         | 5         | 5         | 5      | 0   | 0   | 5      |
|               |               |                 | Mean      | 0.        | 0.        | 1.019  | -   | -   | 8.0    |
|               |               |                 | Sdev      | 0.0       | 0.4       | 0.0030 | -   | -   | 1.41   |
| 200 mg/kg     |               |                 |           |           |           |        |     |     |        |
|               | 2815          | 3/1             | 29        | 0.        | 0.        | 1.020  | Y   | L   | 8.0    |
|               | 2816          | 3/1             | 29        | 0.        | 0.        | 1.022  | Y   | L   | 6.0    |
|               | 2817          | 3/1             | 29        | 0.        | 0.        | 1.022  | Y   | L   | 7.0    |
|               | 2818          | 3/1             | 29        | 0.        | 0.        | 1.022  | Y   | L   | 10.0   |
|               | 2819          | 3/1             | 29        | 0.        | 0.        | 1.020  | Y   | L   | 7.0    |
|               |               |                 | N         | 5         | 5         | 5      | 0   | 0   | 5      |
|               |               |                 | Mean      | 0.        | 0.        | 1.021  | -   | -   | 7.6    |
|               |               |                 | Sdev      | 0.0       | 0.0       | 0.0011 | -   | -   | 1.52   |

BIL - BILIRUBIN  
COL - COLOUR

RBC - HEMOGLOBIN/RED BLOOD CELLS  
APP - APPEARANCE

SG - SPECIFIC GRAVITY  
VOL - URINARY VOLUME



CONFIDENTIAL

Appendix 7  
Day 29 Urine Data  
Test period

Session 1 (Scheduled)  
Fexinidazole

Study Number: 0504-2007

| F e m a l e s |               |                 |           |           |           |        |     |     |        |
|---------------|---------------|-----------------|-----------|-----------|-----------|--------|-----|-----|--------|
| Dose Level    | Animal Number | Group/ Subgroup | Study Day | BIL SCORE | RBC SCORE | SG     | COL | APP | VOL mL |
| 800 mg/kg     |               |                 |           |           |           |        |     |     |        |
|               | 2830          | 4/1             | 29        | 0.        | 0.        | 1.017  | Y   | L   | 11.0   |
|               | 2831          | 4/1             | 29        | 0.        | 0.        | 1.019  | Y   | L   | 11.0   |
|               | 2832          | 4/1             | 29        | 0.        | 0.        | 1.016  | Y   | L   | 6.0    |
|               | 2833          | 4/1             | 29        | 0.        | 0.        | 1.015  | Y   | L   | 8.0    |
|               | 2834          | 4/1             | 29        | 0.        | 0.        | 1.016  | Y   | L   | 10.0   |
|               |               |                 | N         | 5         | 5         | 5      | 0   | 0   | 5      |
|               |               |                 | Mean      | 0.        | 0.        | 1.017  | -   | -   | 9.2    |
|               |               |                 | Sdev      | 0.0       | 0.0       | 0.0015 | -   | -   | 2.17   |

BIL - BILIRUBIN  
COL - COLOUR

RBC - HEMOGLOBIN/RED BLOOD CELLS  
APP - APPEARANCE

SG - SPECIFIC GRAVITY  
VOL - URINARY VOLUME

CONFIDENTIAL

Appendix 7  
Day 43 Urine Data  
Test period

Session 1 (Scheduled)  
Fexinidazole

Study Number: 0504-2007

| M a l e s  |               |                 |           |          |           |           |           |           |           |           |
|------------|---------------|-----------------|-----------|----------|-----------|-----------|-----------|-----------|-----------|-----------|
| Dose Level | Animal Number | Group/ Subgroup | Study Day | PH UNITS | WBC SCORE | NIT SCORE | PRO SCORE | GLU SCORE | KET SCORE | UBG SCORE |
| vehicle    |               |                 |           |          |           |           |           |           |           |           |
|            | 2745          | 1/1             | 43        | 7.0      | 0.        | 0.        | 1.        | 0.        | 0.        | 0.        |
|            | 2746          | 1/1             | 43        | 7.0      | 0.        | 0.        | 1.        | 0.        | 0.        | 0.        |
|            | 2747          | 1/1             | 43        | 7.0      | 0.        | 0.        | 1.        | 0.        | 0.        | 0.        |
|            | 2748          | 1/1             | 43        | 7.0      | 0.        | 0.        | 1.        | 0.        | 0.        | 0.        |
|            | 2749          | 1/1             | 43        | 7.0      | 0.        | 0.        | 0.        | 0.        | 0.        | 0.        |
|            |               |                 | N         | 5        | 5         | 5         | 5         | 5         | 5         | 5         |
|            |               |                 | Mean      | 7.0      | 0.        | 0.        | 1.        | 0.        | 0.        | 0.        |
|            |               |                 | Sdev      | 0.00     | 0.0       | 0.0       | 0.4       | 0.0       | 0.0       | 0.0       |
| 800 mg/kg  |               |                 |           |          |           |           |           |           |           |           |
|            | 2780          | 4/1             | 43        | 7.0      | 0.        | 0.        | 1.        | 0.        | 1.        | 0.        |
|            | 2781          | 4/1             | 43        | 7.0      | 0.        | 0.        | 1.        | 0.        | 1.        | 0.        |
|            | 2782          | 4/1             | 43        | 7.0      | 0.        | 0.        | 1.        | 0.        | 0.        | 0.        |
|            | 2783          | 4/1             | 43        | 7.0      | 0.        | 0.        | 1.        | 0.        | 1.        | 0.        |
|            | 2784          | 4/1             | 43        | 7.0      | 0.        | 0.        | 1.        | 0.        | 0.        | 0.        |
|            |               |                 | N         | 5        | 5         | 5         | 5         | 5         | 5         | 5         |
|            |               |                 | Mean      | 7.0      | 0.        | 0.        | 1.        | 0.        | 1.        | 0.        |
|            |               |                 | Sdev      | 0.00     | 0.0       | 0.0       | 0.0       | 0.0       | 0.5       | 0.0       |

PH - PH  
PRO - PROTEINS  
UBG - UROBILINOGEN

WBC - WHITE BLOOD CELLS  
GLU - GLUCOSE

NIT - NITRITES  
KET - KETONE BODIES

CONFIDENTIAL

Appendix 7  
Day 43 Urine Data  
Test period

Session 1 (Scheduled)  
Fexinidazole

Study Number: 0504-2007

| M a l e s  |               |                 |           |           |           |        |     |     |        |
|------------|---------------|-----------------|-----------|-----------|-----------|--------|-----|-----|--------|
| Dose Level | Animal Number | Group/ Subgroup | Study Day | BIL SCORE | RBC SCORE | SG     | COL | APP | VOL mL |
| vehicle    |               |                 |           |           |           |        |     |     |        |
|            | 2745          | 1/1             | 43        | 0.        | 0.        | 1.021  | Y   | L   | 12.0   |
|            | 2746          | 1/1             | 43        | 0.        | 0.        | 1.018  | Y   | L   | 10.0   |
|            | 2747          | 1/1             | 43        | 0.        | 0.        | 1.018  | Y   | L   | 12.0   |
|            | 2748          | 1/1             | 43        | 0.        | 1.        | 1.021  | Y   | L   | 12.0   |
|            | 2749          | 1/1             | 43        | 0.        | 0.        | 1.019  | Y   | L   | 11.0   |
|            |               |                 | N         | 5         | 5         | 5      | 0   | 0   | 5      |
|            |               |                 | Mean      | 0.        | 0.        | 1.019  | -   | -   | 11.4   |
|            |               |                 | Sdev      | 0.0       | 0.4       | 0.0015 | -   | -   | 0.89   |
| 800 mg/kg  |               |                 |           |           |           |        |     |     |        |
|            | 2780          | 4/1             | 43        | 0.        | 0.        | 1.020  | W   | L   | 9.0    |
|            | 2781          | 4/1             | 43        | 0.        | 0.        | 1.022  | Y   | L   | 10.0   |
|            | 2782          | 4/1             | 43        | 0.        | 0.        | 1.017  | Y   | L   | 10.0   |
|            | 2783          | 4/1             | 43        | 0.        | 0.        | 1.021  | Y   | L   | 10.0   |
|            | 2784          | 4/1             | 43        | 0.        | 0.        | 1.017  | Y   | L   | 12.0   |
|            |               |                 | N         | 5         | 5         | 5      | 0   | 0   | 5      |
|            |               |                 | Mean      | 0.        | 0.        | 1.019  | -   | -   | 10.2   |
|            |               |                 | Sdev      | 0.0       | 0.0       | 0.0023 | -   | -   | 1.10   |

BIL - BILIRUBIN  
COL - COLOUR

RBC - HEMOGLOBIN/RED BLOOD CELLS  
APP - APPEARANCE

SG - SPECIFIC GRAVITY  
VOL - URINARY VOLUME

CONFIDENTIAL

Appendix 7  
Day 43 Urine Data  
Test period

Session 1 (Scheduled)  
Fexinidazole

Study Number: 0504-2007

| F e m a l e s |               |                 |           |          |           |           |           |           |           |           |
|---------------|---------------|-----------------|-----------|----------|-----------|-----------|-----------|-----------|-----------|-----------|
| Dose Level    | Animal Number | Group/ Subgroup | Study Day | PH UNITS | WBC SCORE | NIT SCORE | PRO SCORE | GLU SCORE | KET SCORE | UBG SCORE |
| vehicle       |               |                 |           |          |           |           |           |           |           |           |
|               | 2795          | 1/1             | 43        | 7.0      | 0.        | 0.        | 0.        | 0.        | 0.        | 0.        |
|               | 2796          | 1/1             | 43        | 7.0      | 0.        | 0.        | 0.        | 0.        | 0.        | 0.        |
|               | 2797          | 1/1             | 43        | 7.0      | 0.        | 0.        | 0.        | 0.        | 0.        | 0.        |
|               | 2798          | 1/1             | 43        | 7.0      | 0.        | 0.        | 0.        | 0.        | 0.        | 0.        |
|               | 2799          | 1/1             | 43        | 7.0      | 0.        | 0.        | 0.        | 0.        | 0.        | 0.        |
|               |               |                 | N         | 5        | 5         | 5         | 5         | 5         | 5         | 5         |
|               |               |                 | Mean      | 7.0      | 0.        | 0.        | 0.        | 0.        | 0.        | 0.        |
|               |               |                 | Sdev      | 0.00     | 0.0       | 0.0       | 0.0       | 0.0       | 0.0       | 0.0       |
| 800 mg/kg     |               |                 |           |          |           |           |           |           |           |           |
|               | 2830          | 4/1             | 43        | 7.0      | 0.        | 0.        | 0.        | 0.        | 0.        | 0.        |
|               | 2831          | 4/1             | 43        | 7.0      | 0.        | 0.        | 0.        | 0.        | 0.        | 0.        |
|               | 2832          | 4/1             | 43        | 7.0      | 0.        | 0.        | 0.        | 0.        | 0.        | 0.        |
|               | 2833          | 4/1             | 43        | 7.0      | 0.        | 0.        | 0.        | 0.        | 0.        | 0.        |
|               | 2834          | 4/1             | 43        | 7.0      | 0.        | 0.        | 0.        | 0.        | 0.        | 0.        |
|               |               |                 | N         | 5        | 5         | 5         | 5         | 5         | 5         | 5         |
|               |               |                 | Mean      | 7.0      | 0.        | 0.        | 0.        | 0.        | 0.        | 0.        |
|               |               |                 | Sdev      | 0.00     | 0.0       | 0.0       | 0.0       | 0.0       | 0.0       | 0.0       |

PH - PH  
PRO - PROTEINS  
UBG - UROBILINOGEN

WBC - WHITE BLOOD CELLS  
GLU - GLUCOSE

NIT - NITRITES  
KET - KETONE BODIES

CONFIDENTIAL

Appendix 7  
Day 43 Urine Data  
Test period

Session 1 (Scheduled)  
Fexinidazole

Study Number: 0504-2007

| F e m a l e s |               |                 |           |           |           |        |     |     |        |
|---------------|---------------|-----------------|-----------|-----------|-----------|--------|-----|-----|--------|
| Dose Level    | Animal Number | Group/ Subgroup | Study Day | BIL SCORE | RBC SCORE | SG     | COL | APP | VOL mL |
| vehicle       |               |                 |           |           |           |        |     |     |        |
|               | 2795          | 1/1             | 43        | 0.        | 0.        | 1.018  | Y   | L   | 10.0   |
|               | 2796          | 1/1             | 43        | 0.        | 0.        | 1.019  | Y   | L   | 8.0    |
|               | 2797          | 1/1             | 43        | 0.        | 0.        | 1.016  | Y   | L   | 10.0   |
|               | 2798          | 1/1             | 43        | 0.        | 0.        | 1.018  | Y   | L   | 11.0   |
|               | 2799          | 1/1             | 43        | 0.        | 0.        | 1.014  | Y   | L   | 10.0   |
|               |               |                 | N         | 5         | 5         | 5      | 0   | 0   | 5      |
|               |               |                 | Mean      | 0.        | 0.        | 1.017  | -   | -   | 9.8    |
|               |               |                 | Sdev      | 0.0       | 0.0       | 0.0020 | -   | -   | 1.10   |
| 800 mg/kg     |               |                 |           |           |           |        |     |     |        |
|               | 2830          | 4/1             | 43        | 0.        | 0.        | 1.020  | Y   | L   | 9.0    |
|               | 2831          | 4/1             | 43        | 0.        | 1.        | 1.017  | W   | L   | 1.0    |
|               | 2832          | 4/1             | 43        | 0.        | 1.        | 1.020  | Y   | L   | 7.0    |
|               | 2833          | 4/1             | 43        | 0.        | 0.        | 1.015  | Y   | L   | 8.0    |
|               | 2834          | 4/1             | 43        | 0.        | 0.        | 1.018  | Y   | L   | 8.0    |
|               |               |                 | N         | 5         | 5         | 5      | 0   | 0   | 5      |
|               |               |                 | Mean      | 0.        | 0.        | 1.018  | -   | -   | 6.6    |
|               |               |                 | Sdev      | 0.0       | 0.5       | 0.0021 | -   | -   | 3.21   |

BIL - BILIRUBIN  
COL - COLOUR

RBC - HEMOGLOBIN/RED BLOOD CELLS  
APP - APPEARANCE

SG - SPECIFIC GRAVITY  
VOL - URINARY VOLUME

## ***Appendix 8 Absolute Organ Weights***

CONFIDENTIAL

Appendix 8  
 Absolute Organ Weights (g)  
 Test period  
 Days 29 Interim Sacrifice

Fexinidazole

Study Number: 0504-2007

| Dose Level | Animal Number | Group/Subgroup | Terminal Body Wt (g) | SPLEEN | KIDNEYS | LIVER | THYMUS | HEART |
|------------|---------------|----------------|----------------------|--------|---------|-------|--------|-------|
| M a l e s  |               |                |                      |        |         |       |        |       |
| vehicle    | 2735          | 1/1            | 380.90               | 0.76   | 3.05    | 10.72 | 0.480  | 1.58  |
|            | 2736          | 1/1            | 396.80               | 0.95   | 3.00    | 11.81 | 0.620  | 1.42  |
|            | 2737          | 1/1            | 422.80               | 0.88   | 2.84    | 12.86 | 0.520  | 1.38  |
|            | 2738          | 1/1            | 383.80               | 0.79   | 2.75    | 8.95  | 0.360  | 1.28  |
|            | 2739          | 1/1            | 419.00               | 0.88   | 2.85    | 11.80 | 0.490  | 1.45  |
|            | 2740          | 1/1            | 410.50               | 0.81   | 3.10    | 10.80 | 0.470  | 1.48  |
|            | 2741          | 1/1            | 381.10               | 0.75   | 2.79    | 10.24 | 0.760  | 1.78  |
|            | 2742          | 1/1            | 348.70               | 0.88   | 2.90    | 10.08 | 0.570  | 1.35  |
|            | 2743          | 1/1            | 373.70               | 0.91   | 2.61    | 8.45  | 0.560  | 1.21  |
|            | 2744          | 1/1            | 398.00               | 1.10   | 3.32    | 11.61 | 0.590  | 1.44  |
|            |               | N              | 10                   | 10     | 10      | 10    | 10     | 10    |
|            |               | Mean           | 391.53               | 0.87   | 2.92    | 10.73 | 0.542  | 1.44  |
|            |               | Sdev           | 22.597               | 0.104  | 0.203   | 1.360 | 0.1066 | 0.159 |
| 50 mg/kg   | 2750          | 2/1            | 433.20               | 0.86   | 3.12    | 12.70 | 0.540  | 1.35  |
|            | 2751          | 2/1            | 374.70               | 0.60   | 2.62    | 10.82 | 0.580  | 1.31  |
|            | 2752          | 2/1            | 401.40               | 0.63   | 2.60    | 11.95 | 0.580  | 1.25  |
|            | 2753          | 2/1            | 364.60               | 0.91   | 2.80    | 9.88  | 0.450  | 1.19  |
|            | 2754          | 2/1            | 358.50               | 0.82   | 3.03    | 11.67 | 0.660  | 1.40  |
|            | 2755          | 2/1            | 438.50               | 0.92   | 2.92    | 13.20 | 0.710  | 1.38  |
|            | 2756          | 2/1            | 343.40               | 0.81   | 2.40    | 11.17 | 0.450  | 1.21  |
|            | 2757          | 2/1            | 340.10               | 0.66   | 2.55    | 9.89  | 0.520  | 1.06  |
|            | 2758          | 2/1            | 336.50               | 0.72   | 2.79    | 10.85 | 0.650  | 1.34  |
|            | 2759          | 2/1            | 353.60               | 0.91   | 2.68    | 10.43 | 0.610  | 1.17  |
|            |               | N              | 10                   | 10     | 10      | 10    | 10     | 10    |
|            |               | Mean           | 374.45               | 0.78   | 2.75    | 11.26 | 0.575  | 1.27  |
|            |               | Sdev           | 37.492               | 0.122  | 0.225   | 1.122 | 0.0868 | 0.109 |
| 200 mg/kg  | 2760          | 3/1            | 359.30               | 0.73   | 2.64    | 10.11 | 0.440  | 1.30  |
|            | 2761          | 3/1            | 385.00               | 0.82   | 3.00    | 11.88 | 0.540  | 1.37  |
|            | 2762          | 3/1            | 393.60               | 0.96   | 2.98    | 11.62 | 0.520  | 1.42  |
|            | 2763          | 3/1            | 330.50               | 0.72   | 2.56    | 10.80 | 0.360  | 1.07  |
|            | 2764          | 3/1            | 396.50               | 0.95   | 2.66    | 12.07 | 0.410  | 1.35  |
|            | 2765          | 3/1            | 362.80               | 0.87   | 2.85    | 11.59 | 0.670  | 1.13  |
|            | 2766          | 3/1            | 340.60               | 0.91   | 3.01    | 11.53 | 0.590  | 1.32  |
|            | 2767          | 3/1            | 276.70               | 0.71   | 2.18    | 7.80  | 0.430  | 0.99  |
|            | 2768          | 3/1            | 401.50               | 0.63   | 2.99    | 12.94 | 0.610  | 1.30  |
|            | 2769          | 3/1            | 317.10               | 0.53   | 2.54    | 9.77  | 0.380  | 1.06  |

Note: Data collected using grace days.

CONFIDENTIAL

Appendix 8  
 Absolute Organ Weights (g)  
 Test period  
 Days 29 Interim Sacrifice

Fexinidazole

Study Number: 0504-2007

| Dose Level | Animal Number | Group/ Subgroup | Terminal Body Wt (g) | SPLEEN | KIDNEYS | LIVER | THYMUS | HEART |
|------------|---------------|-----------------|----------------------|--------|---------|-------|--------|-------|
| M a l e s  |               |                 |                      |        |         |       |        |       |
| 200 mg/kg  |               |                 | N 10                 | 10     | 10      | 10    | 10     | 10    |
|            |               |                 | Mean 356.36          | 0.78   | 2.74    | 11.01 | 0.495  | 1.23  |
|            |               |                 | Sdev 40.429          | 0.143  | 0.274   | 1.464 | 0.1062 | 0.153 |
| 800 mg/kg  |               |                 |                      |        |         |       |        |       |
|            | 2770          | 4/1             | 353.30               | 0.67   | 2.55    | 11.65 | 0.390  | 1.25  |
|            | 2771          | 4/1             | 344.70               | 0.81   | 2.80    | 13.35 | 0.460  | 1.37  |
|            | 2772          | 4/1             | 411.00               | 0.68   | 2.62    | 10.73 | 0.470  | 1.27  |
|            | 2773          | 4/1             | 298.50               | 0.57   | 2.19    | 9.54  | 0.460  | 0.95  |
|            | 2774          | 4/1             | 293.60               | 0.54   | 2.23    | 10.63 | 0.320  | 0.98  |
|            | 2775          | 4/1             | 385.00               | 0.79   | 3.09    | 11.98 | 0.570  | 1.40  |
|            | 2776          | 4/1             | 338.80               | 0.63   | 2.56    | 11.41 | 0.360  | 1.11  |
|            | 2777          | 4/1             | 351.00               | 1.05   | 2.77    | 11.62 | 0.500  | 1.20  |
|            | 2778          | 4/1             | 338.80               | 0.76   | 2.63    | 12.03 | 0.500  | 1.01  |
|            | 2779          | 4/1             | 322.70               | 0.49   | 2.27    | 10.56 | 0.330  | 1.06  |
|            |               |                 | N 10                 | 10     | 10      | 10    | 10     | 10    |
|            |               |                 | Mean 343.74          | 0.70   | 2.57    | 11.35 | 0.436  | 1.16  |
|            |               |                 | Sdev 35.627          | 0.163  | 0.283   | 1.045 | 0.0824 | 0.162 |

Note: Data collected using grace days.



CONFIDENTIAL

Appendix 8  
 Absolute Organ Weights (g)  
 Test period  
 Days 29 Interim Sacrifice

Fexinidazole

Study Number: 0504-2007

| Dose Level | Animal Number | Group/Subgroup | Terminal Body Wt (g) | BRAIN | TESTES | PROSTATE | ADRENALS |
|------------|---------------|----------------|----------------------|-------|--------|----------|----------|
| M a l e s  |               |                |                      |       |        |          |          |
| vehicle    | 2735          | 1/1            | 380.90               | 2.15  | 3.48   | 0.78     | 0.069    |
|            | 2736          | 1/1            | 396.80               | 2.20  | 3.63   | 0.76     | 0.066    |
|            | 2737          | 1/1            | 422.80               | 1.94  | 3.22   | 0.43     | 0.064    |
|            | 2738          | 1/1            | 383.80               | 2.17  | 3.85   | 0.64     | 0.056    |
|            | 2739          | 1/1            | 419.00               | 2.02  | 3.45   | 0.48     | 0.071    |
|            | 2740          | 1/1            | 410.50               | 2.16  | 3.63   | 0.62     | 0.073    |
|            | 2741          | 1/1            | 381.10               | 2.07  | 3.53   | 0.62     | 0.045    |
|            | 2742          | 1/1            | 348.70               | 1.98  | 3.24   | 0.70     | 0.054    |
|            | 2743          | 1/1            | 373.70               | 1.94  | 3.43   | 0.59     | 0.051    |
|            | 2744          | 1/1            | 398.00               | 2.12  | 3.41   | 0.53     | 0.076    |
|            |               | N              | 10                   | 10    | 10     | 10       | 10       |
|            |               | Mean           | 391.53               | 2.08  | 3.49   | 0.62     | 0.062    |
|            |               | Sdev           | 22.597               | 0.099 | 0.188  | 0.114    | 0.0102   |
| 50 mg/kg   | 2750          | 2/1            | 433.20               | 2.13  | 3.52   | 0.79     | 0.074    |
|            | 2751          | 2/1            | 374.70               | 2.07  | 3.29   | 0.61     | 0.071    |
|            | 2752          | 2/1            | 401.40               | 2.01  | 3.07   | 0.47     | 0.060    |
|            | 2753          | 2/1            | 364.60               | 2.01  | 3.52   | 0.46     | 0.062    |
|            | 2754          | 2/1            | 358.50               | 2.07  | 3.52   | 0.68     | 0.054    |
|            | 2755          | 2/1            | 438.50               | 2.05  | 3.72   | 0.51     | 0.057    |
|            | 2756          | 2/1            | 343.40               | 1.87  | 3.51   | 0.48     | 0.067    |
|            | 2757          | 2/1            | 340.10               | 2.09  | 3.11   | 0.51     | 0.046    |
|            | 2758          | 2/1            | 336.50               | 1.89  | 3.27   | 0.45     | 0.060    |
|            | 2759          | 2/1            | 353.60               | 1.97  | 3.26   | 0.42     | 0.059    |
|            |               | N              | 10                   | 10    | 10     | 10       | 10       |
|            |               | Mean           | 374.45               | 2.02  | 3.38   | 0.54     | 0.061    |
|            |               | Sdev           | 37.492               | 0.085 | 0.209  | 0.118    | 0.0083   |
| 200 mg/kg  | 2760          | 3/1            | 359.30               | 1.99  | 3.16   | 0.60     | 0.050    |
|            | 2761          | 3/1            | 385.00               | 1.99  | 3.33   | 0.72     | 0.072    |
|            | 2762          | 3/1            | 393.60               | 1.88  | 3.53   | 0.57     | 0.062    |
|            | 2763          | 3/1            | 330.50               | 1.91  | 3.02   | 0.50     | 0.074    |
|            | 2764          | 3/1            | 396.50               | 2.14  | 3.82   | 0.41     | 0.075    |
|            | 2765          | 3/1            | 362.80               | 1.96  | 3.32   | 0.68     | 0.065    |
|            | 2766          | 3/1            | 340.60               | 2.04  | 3.59   | 0.67     | 0.069    |
|            | 2767          | 3/1            | 276.70               | 2.02  | 2.86   | 0.50     | 0.048    |
|            | 2768          | 3/1            | 401.50               | 1.93  | 3.41   | 0.42     | 0.066    |
|            | 2769          | 3/1            | 317.10               | 1.97  | 3.12   | 0.39     | 0.057    |

Note: Data collected using grace days.

CONFIDENTIAL

Appendix 8  
 Absolute Organ Weights (g)  
 Test period  
 Days 29 Interim Sacrifice

Fexinidazole

Study Number: 0504-2007

| Dose Level | Animal Number | Group/ Subgroup | Terminal Body Wt (g) | BRAIN | TESTES | PROSTATE | ADRENALS |
|------------|---------------|-----------------|----------------------|-------|--------|----------|----------|
| M a l e s  |               |                 |                      |       |        |          |          |
| 200 mg/kg  |               |                 | N 10                 | 10    | 10     | 10       | 10       |
|            |               |                 | Mean 356.36          | 1.98  | 3.32   | 0.55     | 0.064    |
|            |               |                 | Sdev 40.429          | 0.074 | 0.287  | 0.120    | 0.0095   |
| 800 mg/kg  |               |                 |                      |       |        |          |          |
|            | 2770          | 4/1             | 353.30               | 2.14  | 3.74   | 0.57     | 0.075    |
|            | 2771          | 4/1             | 344.70               | 2.14  | 3.40   | 0.42     | 0.078    |
|            | 2772          | 4/1             | 411.00               | 2.19  | 3.54   | 0.58     | 0.057    |
|            | 2773          | 4/1             | 298.50               | 1.77  | 2.98   | 0.47     | 0.046    |
|            | 2774          | 4/1             | 293.60               | 1.96  | 3.71   | 0.61     | 0.063    |
|            | 2775          | 4/1             | 385.00               | 2.19  | 3.92   | 0.72     | 0.058    |
|            | 2776          | 4/1             | 338.80               | 1.93  | 3.67   | 0.75     | 0.077    |
|            | 2777          | 4/1             | 351.00               | 2.03  | 3.17   | 0.59     | 0.063    |
|            | 2778          | 4/1             | 338.80               | 2.06  | 3.37   | 0.64     | 0.062    |
|            | 2779          | 4/1             | 322.70               | 2.00  | 2.95   | 0.47     | 0.054    |
|            |               |                 | N 10                 | 10    | 10     | 10       | 10       |
|            |               |                 | Mean 343.74          | 2.04  | 3.45   | 0.58     | 0.063    |
|            |               |                 | Sdev 35.627          | 0.133 | 0.331  | 0.107    | 0.0106   |

Note: Data collected using grace days.

CONFIDENTIAL

Appendix 8  
 Absolute Organ Weights (g)  
 Test period  
 Days 29 Interim Sacrifice

Fexinidazole

Study Number: 0504-2007

| Dose Level    | Animal Number | Group/Subgroup | Terminal Body Wt (g) | SPLEEN | KIDNEYS | LIVER | THYMUS |
|---------------|---------------|----------------|----------------------|--------|---------|-------|--------|
| F e m a l e s |               |                |                      |        |         |       |        |
| vehicle       |               |                |                      |        |         |       |        |
|               | 2785          | 1/1            | 212.40               | 0.57   | 1.52    | 6.06  | 0.350  |
|               | 2786          | 1/1            | 243.20               | 0.60   | 1.62    | 6.35  | 0.340  |
|               | 2787          | 1/1            | 219.60               | 0.65   | 1.59    | 5.77  | 0.230  |
|               | 2788          | 1/1            | 222.60               | 0.64   | 1.63    | 5.69  | 0.420  |
|               | 2789          | 1/1            | 208.30               | 0.63   | 1.39    | 5.28  | 0.350  |
|               | 2790          | 1/1            | 224.50               | 0.54   | 1.86    | 6.40  | 0.360  |
|               | 2791          | 1/1            | 207.60               | 0.40   | 1.29    | 5.17  | 0.290  |
|               | 2792          | 1/1            | 234.00               | 0.50   | 1.76    | 6.45  | 0.280  |
|               | 2793          | 1/1            | 217.30               | 0.59   | 1.68    | 5.83  | 0.430  |
|               | 2794          | 1/1            | 238.50               | 0.59   | 1.71    | 7.19  | 0.310  |
|               |               | N              | 10                   | 10     | 10      | 10    | 10     |
|               |               | Mean           | 222.80               | 0.57   | 1.61    | 6.02  | 0.336  |
|               |               | Sdev           | 12.387               | 0.075  | 0.170   | 0.604 | 0.0615 |
| 50 mg/kg      |               |                |                      |        |         |       |        |
|               | 2800          | 2/1            | 216.80               | 0.57   | 1.67    | 6.02  | 0.320  |
|               | 2801          | 2/1            | 247.90               | 0.63   | 1.60    | 6.93  | 0.310  |
|               | 2802          | 2/1            | 235.20               | 0.80   | 1.66    | 6.15  | 0.370  |
|               | 2803          | 2/1            | 225.20               | 0.75   | 1.67    | 6.74  | 0.310  |
|               | 2804          | 2/1            | 209.90               | 0.68   | 1.61    | 5.73  | 0.420  |
|               | 2805          | 2/1            | 233.00               | 0.79   | 1.93    | 7.10  | 0.450  |
|               | 2806          | 2/1            | 220.30               | 0.74   | 1.55    | 6.31  | 0.510  |
|               | 2807          | 2/1            | 220.50               | 0.51   | 1.51    | 6.20  | 0.300  |
|               | 2808          | 2/1            | 230.60               | 0.59   | 1.56    | 7.12  | 0.400  |
|               | 2809          | 2/1            | 238.70               | 0.78   | 1.83    | 8.16  | 0.380  |
|               |               | N              | 10                   | 10     | 10      | 10    | 10     |
|               |               | Mean           | 227.81               | 0.68   | 1.66    | 6.65  | 0.377  |
|               |               | Sdev           | 11.403               | 0.104  | 0.130   | 0.715 | 0.0696 |
| 200 mg/kg     |               |                |                      |        |         |       |        |
|               | 2810          | 3/1            | 218.20               | 0.55   | 1.68    | 6.52  | 0.400  |
|               | 2811          | 3/1            | 237.90               | 0.54   | 1.76    | 6.27  | 0.250  |
|               | 2812          | 3/1            | 235.20               | 0.63   | 1.64    | 6.71  | 0.360  |
|               | 2813          | 3/1            | 240.00               | 0.58   | 1.88    | 7.66  | 0.320  |
|               | 2814          | 3/1            | 213.00               | 0.58   | 1.50    | 6.05  | 0.390  |
|               | 2815          | 3/1            | 219.20               | 0.60   | 1.53    | 6.64  | 0.390  |
|               | 2816          | 3/1            | 231.50               | 0.57   | 1.77    | 6.61  | 0.280  |
|               | 2817          | 3/1            | 238.10               | 0.68   | 1.82    | 7.36  | 0.310  |
|               | 2818          | 3/1            | 233.20               | 0.48   | 1.68    | 7.29  | 0.420  |
|               | 2819          | 3/1            | 221.90               | 0.45   | 1.70    | 6.90  | 0.340  |

Note: Data collected using grace days.

CONFIDENTIAL

Appendix 8  
 Absolute Organ Weights (g)  
 Test period  
 Days 29 Interim Sacrifice

Fexinidazole

Study Number: 0504-2007

| Dose Level    | Animal Number | Group/ Subgroup | Terminal Body Wt (g) | SPLEEN | KIDNEYS | LIVER | THYMUS |
|---------------|---------------|-----------------|----------------------|--------|---------|-------|--------|
| F e m a l e s |               |                 |                      |        |         |       |        |
| 200 mg/kg     |               |                 | N 10                 | 10     | 10      | 10    | 10     |
|               |               |                 | Mean 228.82          | 0.57   | 1.70    | 6.80  | 0.346  |
|               |               |                 | Sdev 9.799           | 0.067  | 0.119   | 0.505 | 0.0558 |
| 800 mg/kg     |               |                 |                      |        |         |       |        |
|               | 2820          | 4/1             | 207.90               | 0.52   | 1.78    | 7.77  | 0.330  |
|               | 2821          | 4/1             | 195.40               | 0.47   | 1.52    | 6.54  | 0.240  |
|               | 2822          | 4/1             | 228.20               | 0.49   | 1.67    | 6.99  | 0.260  |
|               | 2823          | 4/1             | 248.60               | 0.54   | 1.61    | 9.30  | 0.460  |
|               | 2825          | 4/1             | 213.50               | 0.54   | 2.11    | 10.43 | 0.350  |
|               | 2826          | 4/1             | 212.30               | 0.54   | 1.58    | 7.69  | 0.230  |
|               | 2827          | 4/1             | 223.50               | 0.65   | 1.58    | 8.02  | 0.330  |
|               | 2828          | 4/1             | 219.90               | 0.59   | 1.68    | 9.09  | 0.330  |
|               | 2829          | 4/1             | 220.00               | 0.47   | 1.66    | 7.68  | 0.320  |
|               |               |                 | N 9                  | 9      | 9       | 9     | 9      |
|               |               |                 | Mean 218.81          | 0.53   | 1.69    | 8.17  | 0.317  |
|               |               |                 | Sdev 14.739          | 0.058  | 0.175   | 1.221 | 0.0696 |

Note: Data collected using grace days.

CONFIDENTIAL

Appendix 8  
 Absolute Organ Weights (g)  
 Test period  
 Days 29 Interim Sacrifice

Fexinidazole

Study Number: 0504-2007

| Dose Level    | Animal Number | Group/Subgroup | Terminal Body Wt (g) | HEART | BRAIN | OVARIES | ADRENALS |
|---------------|---------------|----------------|----------------------|-------|-------|---------|----------|
| F e m a l e s |               |                |                      |       |       |         |          |
| vehicle       |               |                |                      |       |       |         |          |
|               | 2785          | 1/1            | 212.40               | 0.82  | 1.91  | 0.133   | 0.072    |
|               | 2786          | 1/1            | 243.20               | 0.84  | 2.10  | 0.149   | 0.068    |
|               | 2787          | 1/1            | 219.60               | 0.76  | 2.00  | 0.105   | 0.067    |
|               | 2788          | 1/1            | 222.60               | 0.85  | 1.86  | 0.116   | 0.076    |
|               | 2789          | 1/1            | 208.30               | 0.79  | 1.88  | 0.120   | 0.074    |
|               | 2790          | 1/1            | 224.50               | 0.86  | 2.05  | 0.135   | 0.067    |
|               | 2791          | 1/1            | 207.60               | 0.71  | 1.85  | 0.118   | 0.075    |
|               | 2792          | 1/1            | 234.00               | 0.84  | 1.89  | 0.101   | 0.072    |
|               | 2793          | 1/1            | 217.30               | 0.85  | 1.76  | 0.098   | 0.073    |
|               | 2794          | 1/1            | 238.50               | 0.86  | 1.78  | 0.122   | 0.096    |
|               |               | N              | 10                   | 10    | 10    | 10      | 10       |
|               |               | Mean           | 222.80               | 0.82  | 1.91  | 0.120   | 0.074    |
|               |               | Sdev           | 12.387               | 0.050 | 0.111 | 0.0161  | 0.0085   |
| 50 mg/kg      |               |                |                      |       |       |         |          |
|               | 2800          | 2/1            | 216.80               | 0.79  | 2.03  | 0.130   | 0.070    |
|               | 2801          | 2/1            | 247.90               | 0.87  | 1.95  | 0.123   | 0.080    |
|               | 2802          | 2/1            | 235.20               | 0.82  | 2.09  | 0.121   | 0.069    |
|               | 2803          | 2/1            | 225.20               | 0.91  | 1.85  | 0.171   | 0.073    |
|               | 2804          | 2/1            | 209.90               | 0.83  | 1.86  | 0.108   | 0.070    |
|               | 2805          | 2/1            | 233.00               | 0.91  | 1.91  | 0.131   | 0.072    |
|               | 2806          | 2/1            | 220.30               | 0.84  | 1.89  | 0.107   | 0.082    |
|               | 2807          | 2/1            | 220.50               | 0.92  | 1.87  | 0.117   | 0.059    |
|               | 2808          | 2/1            | 230.60               | 0.88  | 1.82  | 0.119   | 0.077    |
|               | 2809          | 2/1            | 238.70               | 0.83  | 1.90  | 0.115   | 0.084    |
|               |               | N              | 10                   | 10    | 10    | 10      | 10       |
|               |               | Mean           | 227.81               | 0.86  | 1.92  | 0.124   | 0.074    |
|               |               | Sdev           | 11.403               | 0.044 | 0.084 | 0.0182  | 0.0074   |
| 200 mg/kg     |               |                |                      |       |       |         |          |
|               | 2810          | 3/1            | 218.20               | 0.80  | 1.86  | 0.094   | 0.074    |
|               | 2811          | 3/1            | 237.90               | 0.72  | 1.85  | 0.112   | 0.085    |
|               | 2812          | 3/1            | 235.20               | 0.83  | 2.03  | 0.100   | 0.079    |
|               | 2813          | 3/1            | 240.00               | 0.85  | 1.88  | 0.120   | 0.071    |
|               | 2814          | 3/1            | 213.00               | 0.68  | 1.85  | 0.088   | 0.056    |
|               | 2815          | 3/1            | 219.20               | 0.82  | 1.76  | 0.112   | 0.049    |
|               | 2816          | 3/1            | 231.50               | 0.81  | 1.94  | 0.115   | 0.086    |
|               | 2817          | 3/1            | 238.10               | 0.85  | 1.91  | 0.149   | 0.069    |
|               | 2818          | 3/1            | 233.20               | 0.81  | 1.78  | 0.116   | 0.065    |
|               | 2819          | 3/1            | 221.90               | 0.90  | 1.87  | 0.113   | 0.077    |

Note: Data collected using grace days.

CONFIDENTIAL

Appendix 8  
 Absolute Organ Weights (g)  
 Test period  
 Days 29 Interim Sacrifice

Fexinidazole

Study Number: 0504-2007

| Dose Level    | Animal Number | Group/ Subgroup | Terminal Body Wt (g) | HEART | BRAIN | OVARIES | ADRENALS |
|---------------|---------------|-----------------|----------------------|-------|-------|---------|----------|
| F e m a l e s |               |                 |                      |       |       |         |          |
| 200 mg/kg     |               |                 | N 10                 | 10    | 10    | 10      | 10       |
|               |               |                 | Mean 228.82          | 0.81  | 1.87  | 0.112   | 0.071    |
|               |               |                 | Sdev 9.799           | 0.064 | 0.077 | 0.0169  | 0.0119   |
| 800 mg/kg     |               |                 |                      |       |       |         |          |
|               | 2820          | 4/1             | 207.90               | 0.84  | 1.90  | 0.123   | 0.061    |
|               | 2821          | 4/1             | 195.40               | 0.67  | 1.85  | 0.090   | 0.063    |
|               | 2822          | 4/1             | 228.20               | 0.80  | 1.79  | 0.135   | 0.073    |
|               | 2823          | 4/1             | 248.60               | 0.88  | 1.86  | 0.127   | 0.080    |
|               | 2825          | 4/1             | 213.50               | 0.77  | 1.99  | 0.127   | 0.069    |
|               | 2826          | 4/1             | 212.30               | 0.74  | 1.82  | 0.110   | 0.067    |
|               | 2827          | 4/1             | 223.50               | 0.84  | 1.90  | 0.112   | 0.070    |
|               | 2828          | 4/1             | 219.90               | 0.88  | 1.82  | 0.140   | 0.070    |
|               | 2829          | 4/1             | 220.00               | 0.75  | 1.87  | 0.112   | 0.065    |
|               |               |                 | N 9                  | 9     | 9     | 9       | 9        |
|               |               |                 | Mean 218.81          | 0.80  | 1.87  | 0.119   | 0.069    |
|               |               |                 | Sdev 14.739          | 0.071 | 0.059 | 0.0154  | 0.0059   |

Note: Data collected using grace days.

CONFIDENTIAL

Appendix 8  
 Absolute Organ Weights (g)  
 Test period  
 Days 43 Final Sacrifice

Fexinidazole

Study Number: 0504-2007

| Dose Level | Animal Number | Group/ Subgroup | Terminal Body Wt (g) | SPLEEN | KIDNEYS | LIVER | THYMUS | HEART |
|------------|---------------|-----------------|----------------------|--------|---------|-------|--------|-------|
| M a l e s  |               |                 |                      |        |         |       |        |       |
| vehicle    |               |                 |                      |        |         |       |        |       |
|            | 2745          | 1/1             | 405.30               | 0.63   | 2.90    | 9.74  | 0.470  | 1.34  |
|            | 2746          | 1/1             | 370.80               | 0.51   | 2.56    | 9.01  | 0.460  | 1.26  |
|            | 2747          | 1/1             | 436.60               | 0.74   | 3.13    | 11.85 | 0.470  | 1.42  |
|            | 2748          | 1/1             | 458.60               | 0.55   | 2.44    | 9.17  | 0.440  | 1.43  |
|            | 2749          | 1/1             | 363.60               | 0.72   | 3.37    | 12.42 | 0.510  | 1.55  |
|            |               | N               | 5                    | 5      | 5       | 5     | 5      | 5     |
|            |               | Mean            | 406.98               | 0.63   | 2.88    | 10.44 | 0.470  | 1.40  |
|            |               | Sdev            | 41.035               | 0.101  | 0.387   | 1.586 | 0.0255 | 0.108 |
| 800 mg/kg  |               |                 |                      |        |         |       |        |       |
|            | 2780          | 4/1             | 369.00               | 0.64   | 2.60    | 10.24 | 0.530  | 1.20  |
|            | 2781          | 4/1             | 341.60               | 0.81   | 2.47    | 9.13  | 0.390  | 1.35  |
|            | 2782          | 4/1             | 359.30               | 0.59   | 2.58    | 12.00 | 0.270  | 1.33  |
|            | 2783          | 4/1             | 407.10               | 0.71   | 3.03    | 11.15 | 0.420  | 1.42  |
|            | 2784          | 4/1             | 385.50               | 0.73   | 2.72    | 9.76  | 0.440  | 1.36  |
|            |               | N               | 5                    | 5      | 5       | 5     | 5      | 5     |
|            |               | Mean            | 372.50               | 0.70   | 2.68    | 10.46 | 0.410  | 1.33  |
|            |               | Sdev            | 25.037               | 0.085  | 0.215   | 1.135 | 0.0941 | 0.081 |

Note: Data collected using grace days.

CONFIDENTIAL

Appendix 8  
 Absolute Organ Weights (g)  
 Test period  
 Days 43 Final Sacrifice

Fexinidazole

Study Number: 0504-2007

| Dose Level | Animal Number | Group/ Subgroup | Terminal Body Wt (g) | BRAIN | TESTES | PROSTATE | ADRENALS |
|------------|---------------|-----------------|----------------------|-------|--------|----------|----------|
| M a l e s  |               |                 |                      |       |        |          |          |
| vehicle    | 2745          | 1/1             | 405.30               | 2.08  | 3.13   | 0.75     | 0.055    |
|            | 2746          | 1/1             | 370.80               | 2.10  | 3.10   | 0.41     | 0.045    |
|            | 2747          | 1/1             | 436.60               | 1.98  | 3.58   | 0.60     | 0.062    |
|            | 2748          | 1/1             | 458.60               | 1.91  | 3.50   | 0.44     | 0.049    |
|            | 2749          | 1/1             | 363.60               | 2.02  | 3.67   | 0.73     | 0.076    |
|            |               | N               | 5                    | 5     | 5      | 5        | 5        |
|            |               | Mean            | 406.98               | 2.02  | 3.40   | 0.59     | 0.057    |
|            |               | Sdev            | 41.035               | 0.077 | 0.264  | 0.158    | 0.0123   |
| 800 mg/kg  | 2780          | 4/1             | 369.00               | 2.06  | 3.42   | 0.53     | 0.065    |
|            | 2781          | 4/1             | 341.60               | 2.10  | 3.79   | 0.65     | 0.069    |
|            | 2782          | 4/1             | 359.30               | 2.10  | 3.39   | 0.67     | 0.051    |
|            | 2783          | 4/1             | 407.10               | 2.06  | 3.96   | 0.61     | 0.068    |
|            | 2784          | 4/1             | 385.50               | 2.08  | 3.13   | 0.72     | 0.057    |
|            |               | N               | 5                    | 5     | 5      | 5        | 5        |
|            |               | Mean            | 372.50               | 2.08  | 3.54   | 0.64     | 0.062    |
|            |               | Sdev            | 25.037               | 0.020 | 0.333  | 0.071    | 0.0078   |

Note: Data collected using grace days.



CONFIDENTIAL

Appendix 8  
 Absolute Organ Weights (g)  
 Test period  
 Days 43 Final Sacrifice

Fexinidazole

Study Number: 0504-2007

| Dose Level    | Animal Number | Group/ Subgroup | Terminal Body Wt (g) | SPLEEN | KIDNEYS | LIVER | THYMUS |
|---------------|---------------|-----------------|----------------------|--------|---------|-------|--------|
| F e m a l e s |               |                 |                      |        |         |       |        |
| vehicle       | 2795          | 1/1             | 231.10               | 0.52   | 1.61    | 6.25  | 0.250  |
|               | 2796          | 1/1             | 233.10               | 0.52   | 1.75    | 6.11  | 0.380  |
|               | 2797          | 1/1             | 227.50               | 0.50   | 1.77    | 6.67  | 0.260  |
|               | 2798          | 1/1             | 255.10               | 0.55   | 1.66    | 6.36  | 0.260  |
|               | 2799          | 1/1             | 250.30               | 0.52   | 2.00    | 6.52  | 0.360  |
|               |               | N               | 5                    | 5      | 5       | 5     | 5      |
|               |               | Mean            | 239.42               | 0.52   | 1.76    | 6.38  | 0.302  |
|               |               | Sdev            | 12.405               | 0.018  | 0.150   | 0.220 | 0.0626 |
| 800 mg/kg     | 2830          | 4/1             | 245.00               | 0.80   | 1.72    | 7.19  | 0.270  |
|               | 2831          | 4/1             | 206.80               | 0.45   | 1.53    | 6.24  | 0.230  |
|               | 2832          | 4/1             | 213.00               | 0.45   | 1.56    | 6.22  | 0.320  |
|               | 2833          | 4/1             | 229.20               | 0.47   | 1.40    | 6.18  | 0.270  |
|               | 2834          | 4/1             | 228.70               | 0.44   | 1.55    | 6.70  | 0.410  |
|               |               | N               | 5                    | 5      | 5       | 5     | 5      |
|               |               | Mean            | 224.54               | 0.52   | 1.55    | 6.51  | 0.300  |
|               |               | Sdev            | 15.046               | 0.156  | 0.114   | 0.437 | 0.0693 |

Note: Data collected using grace days.

CONFIDENTIAL

Appendix 8  
 Absolute Organ Weights (g)  
 Test period  
 Days 43 Final Sacrifice

Fexinidazole

Study Number: 0504-2007

| Dose Level    | Animal Number | Group/ Subgroup | Terminal Body Wt (g) | HEART | BRAIN | OVARIES | ADRENALS |
|---------------|---------------|-----------------|----------------------|-------|-------|---------|----------|
| F e m a l e s |               |                 |                      |       |       |         |          |
| vehicle       |               |                 |                      |       |       |         |          |
|               | 2795          | 1/1             | 231.10               | 0.82  | 1.89  | 0.094   | 0.071    |
|               | 2796          | 1/1             | 233.10               | 0.90  | 1.92  | 0.105   | 0.077    |
|               | 2797          | 1/1             | 227.50               | 0.88  | 2.14  | 0.121   | 0.085    |
|               | 2798          | 1/1             | 255.10               | 0.93  | 2.00  | 0.110   | 0.072    |
|               | 2799          | 1/1             | 250.30               | 0.92  | 1.93  | 0.082   | 0.065    |
|               |               | N               | 5                    | 5     | 5     | 5       | 5        |
|               |               | Mean            | 239.42               | 0.89  | 1.98  | 0.103   | 0.074    |
|               |               | Sdev            | 12.405               | 0.044 | 0.100 | 0.0148  | 0.0075   |
| 800 mg/kg     |               |                 |                      |       |       |         |          |
|               | 2830          | 4/1             | 245.00               | 0.92  | 1.78  | 0.098   | 0.063    |
|               | 2831          | 4/1             | 206.80               | 0.81  | 1.91  | 0.093   | 0.058    |
|               | 2832          | 4/1             | 213.00               | 0.85  | 1.79  | 0.085   | 0.065    |
|               | 2833          | 4/1             | 229.20               | 0.75  | 1.91  | 0.091   | 0.056    |
|               | 2834          | 4/1             | 228.70               | 0.86  | 1.87  | 0.095   | 0.057    |
|               |               | N               | 5                    | 5     | 5     | 5       | 5        |
|               |               | Mean            | 224.54               | 0.84  | 1.85  | 0.092   | 0.060    |
|               |               | Sdev            | 15.046               | 0.063 | 0.063 | 0.0048  | 0.0040   |

Note: Data collected using grace days.

## ***Appendix 9 Relative Organ Weights***

CONFIDENTIAL

Appendix 9  
Relative Organ Weights (% Body Weight)  
Test period  
Days 29 Interim Sacrifice

Fexinidazole

Study Number: 0504-2007

| Dose Level | Animal Number | Group/Subgroup | Terminal Body Wt (g) | SPLEEN | KIDNEYS | LIVER | THYMUS | HEART |
|------------|---------------|----------------|----------------------|--------|---------|-------|--------|-------|
| M a l e s  |               |                |                      |        |         |       |        |       |
| vehicle    | 2735          | 1/1            | 380.90               | 0.20   | 0.80    | 2.81  | 0.126  | 0.41  |
|            | 2736          | 1/1            | 396.80               | 0.24   | 0.76    | 2.98  | 0.156  | 0.36  |
|            | 2737          | 1/1            | 422.80               | 0.21   | 0.67    | 3.04  | 0.123  | 0.33  |
|            | 2738          | 1/1            | 383.80               | 0.21   | 0.72    | 2.33  | 0.094  | 0.33  |
|            | 2739          | 1/1            | 419.00               | 0.21   | 0.68    | 2.82  | 0.117  | 0.35  |
|            | 2740          | 1/1            | 410.50               | 0.20   | 0.76    | 2.63  | 0.114  | 0.36  |
|            | 2741          | 1/1            | 381.10               | 0.20   | 0.73    | 2.69  | 0.199  | 0.47  |
|            | 2742          | 1/1            | 348.70               | 0.25   | 0.83    | 2.89  | 0.163  | 0.39  |
|            | 2743          | 1/1            | 373.70               | 0.24   | 0.70    | 2.26  | 0.150  | 0.32  |
|            | 2744          | 1/1            | 398.00               | 0.28   | 0.83    | 2.92  | 0.148  | 0.36  |
|            |               | N              | 10                   | 10     | 10      | 10    | 10     | 10    |
|            |               | Mean           | 391.53               | 0.22   | 0.75    | 2.74  | 0.139  | 0.37  |
|            |               | Sdev           | 22.597               | 0.028  | 0.059   | 0.263 | 0.0304 | 0.045 |
| 50 mg/kg   | 2750          | 2/1            | 433.20               | 0.20   | 0.72    | 2.93  | 0.125  | 0.31  |
|            | 2751          | 2/1            | 374.70               | 0.16   | 0.70    | 2.89  | 0.155  | 0.35  |
|            | 2752          | 2/1            | 401.40               | 0.16   | 0.65    | 2.98  | 0.144  | 0.31  |
|            | 2753          | 2/1            | 364.60               | 0.25   | 0.77    | 2.71  | 0.123  | 0.33  |
|            | 2754          | 2/1            | 358.50               | 0.23   | 0.85    | 3.26  | 0.184  | 0.39  |
|            | 2755          | 2/1            | 438.50               | 0.21   | 0.67    | 3.01  | 0.162  | 0.31  |
|            | 2756          | 2/1            | 343.40               | 0.24   | 0.70    | 3.25  | 0.131  | 0.35  |
|            | 2757          | 2/1            | 340.10               | 0.19   | 0.75    | 2.91  | 0.153  | 0.31  |
|            | 2758          | 2/1            | 336.50               | 0.21   | 0.83    | 3.22  | 0.193  | 0.40  |
|            | 2759          | 2/1            | 353.60               | 0.26   | 0.76    | 2.95  | 0.173  | 0.33  |
|            |               | N              | 10                   | 10     | 10      | 10    | 10     | 10    |
|            |               | Mean           | 374.45               | 0.21   | 0.74    | 3.01  | 0.154  | 0.34  |
|            |               | Sdev           | 37.492               | 0.034  | 0.065   | 0.180 | 0.0242 | 0.033 |
| 200 mg/kg  | 2760          | 3/1            | 359.30               | 0.20   | 0.73    | 2.81  | 0.122  | 0.36  |
|            | 2761          | 3/1            | 385.00               | 0.21   | 0.78    | 3.09  | 0.140  | 0.36  |
|            | 2762          | 3/1            | 393.60               | 0.24   | 0.76    | 2.95  | 0.132  | 0.36  |
|            | 2763          | 3/1            | 330.50               | 0.22   | 0.77    | 3.27  | 0.109  | 0.32  |
|            | 2764          | 3/1            | 396.50               | 0.24   | 0.67    | 3.04  | 0.103  | 0.34  |
|            | 2765          | 3/1            | 362.80               | 0.24   | 0.79    | 3.19  | 0.185  | 0.31  |
|            | 2766          | 3/1            | 340.60               | 0.27   | 0.88    | 3.39  | 0.173  | 0.39  |
|            | 2767          | 3/1            | 276.70               | 0.26   | 0.79    | 2.82  | 0.155  | 0.36  |
|            | 2768          | 3/1            | 401.50               | 0.16   | 0.74    | 3.22  | 0.152  | 0.32  |
|            | 2769          | 3/1            | 317.10               | 0.17   | 0.80    | 3.08  | 0.120  | 0.33  |

Note: Data collected using grace days.

CONFIDENTIAL

Appendix 9  
Relative Organ Weights (% Body Weight)  
Test period  
Days 29 Interim Sacrifice

Fexinidazole

Study Number: 0504-2007

| Dose Level | Animal Number | Group/ Subgroup | Terminal Body Wt (g) | SPLEEN | KIDNEYS | LIVER | THYMUS | HEART |
|------------|---------------|-----------------|----------------------|--------|---------|-------|--------|-------|
| M a l e s  |               |                 |                      |        |         |       |        |       |
| 200 mg/kg  |               |                 | N 10                 | 10     | 10      | 10    | 10     | 10    |
|            |               |                 | Mean 356.36          | 0.22   | 0.77    | 3.09  | 0.139  | 0.35  |
|            |               |                 | Sdev 40.429          | 0.037  | 0.054   | 0.188 | 0.0270 | 0.023 |
| 800 mg/kg  |               |                 |                      |        |         |       |        |       |
|            | 2770          | 4/1             | 353.30               | 0.19   | 0.72    | 3.30  | 0.110  | 0.35  |
|            | 2771          | 4/1             | 344.70               | 0.23   | 0.81    | 3.87  | 0.133  | 0.40  |
|            | 2772          | 4/1             | 411.00               | 0.17   | 0.64    | 2.61  | 0.114  | 0.31  |
|            | 2773          | 4/1             | 298.50               | 0.19   | 0.73    | 3.20  | 0.154  | 0.32  |
|            | 2774          | 4/1             | 293.60               | 0.18   | 0.76    | 3.62  | 0.109  | 0.33  |
|            | 2775          | 4/1             | 385.00               | 0.21   | 0.80    | 3.11  | 0.148  | 0.36  |
|            | 2776          | 4/1             | 338.80               | 0.19   | 0.76    | 3.37  | 0.106  | 0.33  |
|            | 2777          | 4/1             | 351.00               | 0.30   | 0.79    | 3.31  | 0.142  | 0.34  |
|            | 2778          | 4/1             | 338.80               | 0.22   | 0.78    | 3.55  | 0.148  | 0.30  |
|            | 2779          | 4/1             | 322.70               | 0.15   | 0.70    | 3.27  | 0.102  | 0.33  |
|            |               |                 | N 10                 | 10     | 10      | 10    | 10     | 10    |
|            |               |                 | Mean 343.74          | 0.20   | 0.75    | 3.32  | 0.127  | 0.34  |
|            |               |                 | Sdev 35.627          | 0.042  | 0.053   | 0.336 | 0.0202 | 0.029 |

Note: Data collected using grace days.

CONFIDENTIAL

Appendix 9  
Relative Organ Weights (% Body Weight)  
Test period  
Days 29 Interim Sacrifice

Fexinidazole

Study Number: 0504-2007

| Dose Level | Animal Number | Group/Subgroup | Terminal Body Wt (g) | BRAIN | TESTES | PROSTATE | ADRENALS |
|------------|---------------|----------------|----------------------|-------|--------|----------|----------|
| M a l e s  |               |                |                      |       |        |          |          |
| vehicle    | 2735          | 1/1            | 380.90               | 0.56  | 0.91   | 0.20     | 0.018    |
|            | 2736          | 1/1            | 396.80               | 0.55  | 0.91   | 0.19     | 0.017    |
|            | 2737          | 1/1            | 422.80               | 0.46  | 0.76   | 0.10     | 0.015    |
|            | 2738          | 1/1            | 383.80               | 0.57  | 1.00   | 0.17     | 0.015    |
|            | 2739          | 1/1            | 419.00               | 0.48  | 0.82   | 0.11     | 0.017    |
|            | 2740          | 1/1            | 410.50               | 0.53  | 0.88   | 0.15     | 0.018    |
|            | 2741          | 1/1            | 381.10               | 0.54  | 0.93   | 0.16     | 0.012    |
|            | 2742          | 1/1            | 348.70               | 0.57  | 0.93   | 0.20     | 0.016    |
|            | 2743          | 1/1            | 373.70               | 0.52  | 0.92   | 0.16     | 0.014    |
|            | 2744          | 1/1            | 398.00               | 0.53  | 0.86   | 0.13     | 0.019    |
|            |               | N              | 10                   | 10    | 10     | 10       | 10       |
|            |               | Mean           | 391.53               | 0.53  | 0.89   | 0.16     | 0.016    |
|            |               | Sdev           | 22.597               | 0.037 | 0.066  | 0.035    | 0.0022   |
| 50 mg/kg   | 2750          | 2/1            | 433.20               | 0.49  | 0.81   | 0.18     | 0.017    |
|            | 2751          | 2/1            | 374.70               | 0.55  | 0.88   | 0.16     | 0.019    |
|            | 2752          | 2/1            | 401.40               | 0.50  | 0.76   | 0.12     | 0.015    |
|            | 2753          | 2/1            | 364.60               | 0.55  | 0.97   | 0.13     | 0.017    |
|            | 2754          | 2/1            | 358.50               | 0.58  | 0.98   | 0.19     | 0.015    |
|            | 2755          | 2/1            | 438.50               | 0.47  | 0.85   | 0.12     | 0.013    |
|            | 2756          | 2/1            | 343.40               | 0.54  | 1.02   | 0.14     | 0.020    |
|            | 2757          | 2/1            | 340.10               | 0.61  | 0.91   | 0.15     | 0.013    |
|            | 2758          | 2/1            | 336.50               | 0.56  | 0.97   | 0.13     | 0.018    |
|            | 2759          | 2/1            | 353.60               | 0.56  | 0.92   | 0.12     | 0.017    |
|            |               | N              | 10                   | 10    | 10     | 10       | 10       |
|            |               | Mean           | 374.45               | 0.54  | 0.91   | 0.14     | 0.016    |
|            |               | Sdev           | 37.492               | 0.044 | 0.082  | 0.027    | 0.0022   |
| 200 mg/kg  | 2760          | 3/1            | 359.30               | 0.55  | 0.88   | 0.17     | 0.014    |
|            | 2761          | 3/1            | 385.00               | 0.52  | 0.86   | 0.19     | 0.019    |
|            | 2762          | 3/1            | 393.60               | 0.48  | 0.90   | 0.14     | 0.016    |
|            | 2763          | 3/1            | 330.50               | 0.58  | 0.91   | 0.15     | 0.022    |
|            | 2764          | 3/1            | 396.50               | 0.54  | 0.96   | 0.10     | 0.019    |
|            | 2765          | 3/1            | 362.80               | 0.54  | 0.92   | 0.19     | 0.018    |
|            | 2766          | 3/1            | 340.60               | 0.60  | 1.05   | 0.20     | 0.020    |
|            | 2767          | 3/1            | 276.70               | 0.73  | 1.03   | 0.18     | 0.017    |
|            | 2768          | 3/1            | 401.50               | 0.48  | 0.85   | 0.10     | 0.017    |
|            | 2769          | 3/1            | 317.10               | 0.62  | 0.98   | 0.12     | 0.018    |

Note: Data collected using grace days.

CONFIDENTIAL

Appendix 9  
 Relative Organ Weights (% Body Weight)  
 Test period  
 Days 29 Interim Sacrifice

Fexinidazole

Study Number: 0504-2007

| Dose Level | Animal Number | Group/Subgroup | Terminal Body Wt (g) | BRAIN | TESTES | PROSTATE | ADRENALS |
|------------|---------------|----------------|----------------------|-------|--------|----------|----------|
| M a l e s  |               |                |                      |       |        |          |          |
| 200 mg/kg  |               |                | N 10                 | 10    | 10     | 10       | 10       |
|            |               |                | Mean 356.36          | 0.56  | 0.94   | 0.15     | 0.018    |
|            |               |                | Sdev 40.429          | 0.075 | 0.070  | 0.035    | 0.0023   |
| 800 mg/kg  |               |                |                      |       |        |          |          |
|            | 2770          | 4/1            | 353.30               | 0.61  | 1.06   | 0.16     | 0.021    |
|            | 2771          | 4/1            | 344.70               | 0.62  | 0.99   | 0.12     | 0.023    |
|            | 2772          | 4/1            | 411.00               | 0.53  | 0.86   | 0.14     | 0.014    |
|            | 2773          | 4/1            | 298.50               | 0.59  | 1.00   | 0.16     | 0.015    |
|            | 2774          | 4/1            | 293.60               | 0.67  | 1.26   | 0.21     | 0.021    |
|            | 2775          | 4/1            | 385.00               | 0.57  | 1.02   | 0.19     | 0.015    |
|            | 2776          | 4/1            | 338.80               | 0.57  | 1.08   | 0.22     | 0.023    |
|            | 2777          | 4/1            | 351.00               | 0.58  | 0.90   | 0.17     | 0.018    |
|            | 2778          | 4/1            | 338.80               | 0.61  | 0.99   | 0.19     | 0.018    |
|            | 2779          | 4/1            | 322.70               | 0.62  | 0.91   | 0.15     | 0.017    |
|            |               |                | N 10                 | 10    | 10     | 10       | 10       |
|            |               |                | Mean 343.74          | 0.60  | 1.01   | 0.17     | 0.019    |
|            |               |                | Sdev 35.627          | 0.037 | 0.113  | 0.031    | 0.0033   |

Note: Data collected using grace days.

CONFIDENTIAL

Appendix 9  
Relative Organ Weights (% Body Weight)  
Test period  
Days 29 Interim Sacrifice

Fexinidazole

Study Number: 0504-2007

| Dose Level    | Animal Number | Group/Subgroup | Terminal Body Wt (g) | SPLEEN | KIDNEYS | LIVER | THYMUS |
|---------------|---------------|----------------|----------------------|--------|---------|-------|--------|
| F e m a l e s |               |                |                      |        |         |       |        |
| vehicle       |               |                |                      |        |         |       |        |
|               | 2785          | 1/1            | 212.40               | 0.27   | 0.72    | 2.85  | 0.165  |
|               | 2786          | 1/1            | 243.20               | 0.25   | 0.67    | 2.61  | 0.140  |
|               | 2787          | 1/1            | 219.60               | 0.30   | 0.72    | 2.63  | 0.105  |
|               | 2788          | 1/1            | 222.60               | 0.29   | 0.73    | 2.56  | 0.189  |
|               | 2789          | 1/1            | 208.30               | 0.30   | 0.67    | 2.53  | 0.168  |
|               | 2790          | 1/1            | 224.50               | 0.24   | 0.83    | 2.85  | 0.160  |
|               | 2791          | 1/1            | 207.60               | 0.19   | 0.62    | 2.49  | 0.140  |
|               | 2792          | 1/1            | 234.00               | 0.21   | 0.75    | 2.76  | 0.120  |
|               | 2793          | 1/1            | 217.30               | 0.27   | 0.77    | 2.68  | 0.198  |
|               | 2794          | 1/1            | 238.50               | 0.25   | 0.72    | 3.01  | 0.130  |
|               |               | N              | 10                   | 10     | 10      | 10    | 10     |
|               |               | Mean           | 222.80               | 0.26   | 0.72    | 2.70  | 0.151  |
|               |               | Sdev           | 12.387               | 0.035  | 0.059   | 0.168 | 0.0298 |
| 50 mg/kg      |               |                |                      |        |         |       |        |
|               | 2800          | 2/1            | 216.80               | 0.26   | 0.77    | 2.78  | 0.148  |
|               | 2801          | 2/1            | 247.90               | 0.25   | 0.65    | 2.80  | 0.125  |
|               | 2802          | 2/1            | 235.20               | 0.34   | 0.71    | 2.61  | 0.157  |
|               | 2803          | 2/1            | 225.20               | 0.33   | 0.74    | 2.99  | 0.138  |
|               | 2804          | 2/1            | 209.90               | 0.32   | 0.77    | 2.73  | 0.200  |
|               | 2805          | 2/1            | 233.00               | 0.34   | 0.83    | 3.05  | 0.193  |
|               | 2806          | 2/1            | 220.30               | 0.34   | 0.70    | 2.86  | 0.232  |
|               | 2807          | 2/1            | 220.50               | 0.23   | 0.68    | 2.81  | 0.136  |
|               | 2808          | 2/1            | 230.60               | 0.26   | 0.68    | 3.09  | 0.173  |
|               | 2809          | 2/1            | 238.70               | 0.33   | 0.77    | 3.42  | 0.159  |
|               |               | N              | 10                   | 10     | 10      | 10    | 10     |
|               |               | Mean           | 227.81               | 0.30   | 0.73    | 2.91  | 0.166  |
|               |               | Sdev           | 11.403               | 0.043  | 0.055   | 0.230 | 0.0335 |
| 200 mg/kg     |               |                |                      |        |         |       |        |
|               | 2810          | 3/1            | 218.20               | 0.25   | 0.77    | 2.99  | 0.183  |
|               | 2811          | 3/1            | 237.90               | 0.23   | 0.74    | 2.64  | 0.105  |
|               | 2812          | 3/1            | 235.20               | 0.27   | 0.70    | 2.85  | 0.153  |
|               | 2813          | 3/1            | 240.00               | 0.24   | 0.78    | 3.19  | 0.133  |
|               | 2814          | 3/1            | 213.00               | 0.27   | 0.70    | 2.84  | 0.183  |
|               | 2815          | 3/1            | 219.20               | 0.27   | 0.70    | 3.03  | 0.178  |
|               | 2816          | 3/1            | 231.50               | 0.25   | 0.76    | 2.86  | 0.121  |
|               | 2817          | 3/1            | 238.10               | 0.29   | 0.76    | 3.09  | 0.130  |
|               | 2818          | 3/1            | 233.20               | 0.21   | 0.72    | 3.13  | 0.180  |
|               | 2819          | 3/1            | 221.90               | 0.20   | 0.77    | 3.11  | 0.153  |

Note: Data collected using grace days.



CONFIDENTIAL

Appendix 9  
 Relative Organ Weights (% Body Weight)  
 Test period  
 Days 29 Interim Sacrifice

Fexinidazole

Study Number: 0504-2007

| Dose Level    | Animal Number | Group/ Subgroup | Terminal Body Wt (g) | SPLEEN | KIDNEYS | LIVER | THYMUS |
|---------------|---------------|-----------------|----------------------|--------|---------|-------|--------|
| F e m a l e s |               |                 |                      |        |         |       |        |
| 200 mg/kg     |               |                 | N 10                 | 10     | 10      | 10    | 10     |
|               |               |                 | Mean 228.82          | 0.25   | 0.74    | 2.97  | 0.152  |
|               |               |                 | Sdev 9.799           | 0.029  | 0.033   | 0.172 | 0.0287 |
| 800 mg/kg     |               |                 |                      |        |         |       |        |
|               | 2820          | 4/1             | 207.90               | 0.25   | 0.86    | 3.74  | 0.159  |
|               | 2821          | 4/1             | 195.40               | 0.24   | 0.78    | 3.35  | 0.123  |
|               | 2822          | 4/1             | 228.20               | 0.21   | 0.73    | 3.06  | 0.114  |
|               | 2823          | 4/1             | 248.60               | 0.22   | 0.65    | 3.74  | 0.185  |
|               | 2825          | 4/1             | 213.50               | 0.25   | 0.99    | 4.89  | 0.164  |
|               | 2826          | 4/1             | 212.30               | 0.25   | 0.74    | 3.62  | 0.108  |
|               | 2827          | 4/1             | 223.50               | 0.29   | 0.71    | 3.59  | 0.148  |
|               | 2828          | 4/1             | 219.90               | 0.27   | 0.76    | 4.13  | 0.150  |
|               | 2829          | 4/1             | 220.00               | 0.21   | 0.75    | 3.49  | 0.145  |
|               |               |                 | N 9                  | 9      | 9       | 9     | 9      |
|               |               |                 | Mean 218.81          | 0.24   | 0.77    | 3.73  | 0.144  |
|               |               |                 | Sdev 14.739          | 0.026  | 0.098   | 0.522 | 0.0249 |

Note: Data collected using grace days.

CONFIDENTIAL

Appendix 9  
Relative Organ Weights (% Body Weight)  
Test period  
Days 29 Interim Sacrifice

Fexinidazole

Study Number: 0504-2007

| Dose Level    | Animal Number | Group/ Subgroup | Terminal Body Wt (g) | HEART | BRAIN | OVARIES | ADRENALS |
|---------------|---------------|-----------------|----------------------|-------|-------|---------|----------|
| F e m a l e s |               |                 |                      |       |       |         |          |
| vehicle       |               |                 |                      |       |       |         |          |
|               | 2785          | 1/1             | 212.40               | 0.39  | 0.90  | 0.062   | 0.034    |
|               | 2786          | 1/1             | 243.20               | 0.35  | 0.86  | 0.061   | 0.028    |
|               | 2787          | 1/1             | 219.60               | 0.35  | 0.91  | 0.048   | 0.031    |
|               | 2788          | 1/1             | 222.60               | 0.38  | 0.84  | 0.052   | 0.034    |
|               | 2789          | 1/1             | 208.30               | 0.38  | 0.90  | 0.058   | 0.036    |
|               | 2790          | 1/1             | 224.50               | 0.38  | 0.91  | 0.060   | 0.030    |
|               | 2791          | 1/1             | 207.60               | 0.34  | 0.89  | 0.057   | 0.036    |
|               | 2792          | 1/1             | 234.00               | 0.36  | 0.81  | 0.043   | 0.031    |
|               | 2793          | 1/1             | 217.30               | 0.39  | 0.81  | 0.045   | 0.033    |
|               | 2794          | 1/1             | 238.50               | 0.36  | 0.75  | 0.051   | 0.040    |
|               |               | N               | 10                   | 10    | 10    | 10      | 10       |
|               |               | Mean            | 222.80               | 0.37  | 0.86  | 0.054   | 0.033    |
|               |               | Sdev            | 12.387               | 0.019 | 0.056 | 0.0069  | 0.0036   |
| 50 mg/kg      |               |                 |                      |       |       |         |          |
|               | 2800          | 2/1             | 216.80               | 0.36  | 0.94  | 0.060   | 0.032    |
|               | 2801          | 2/1             | 247.90               | 0.35  | 0.79  | 0.049   | 0.032    |
|               | 2802          | 2/1             | 235.20               | 0.35  | 0.89  | 0.051   | 0.029    |
|               | 2803          | 2/1             | 225.20               | 0.40  | 0.82  | 0.076   | 0.032    |
|               | 2804          | 2/1             | 209.90               | 0.40  | 0.89  | 0.052   | 0.033    |
|               | 2805          | 2/1             | 233.00               | 0.39  | 0.82  | 0.056   | 0.031    |
|               | 2806          | 2/1             | 220.30               | 0.38  | 0.86  | 0.049   | 0.037    |
|               | 2807          | 2/1             | 220.50               | 0.42  | 0.85  | 0.053   | 0.027    |
|               | 2808          | 2/1             | 230.60               | 0.38  | 0.79  | 0.051   | 0.033    |
|               | 2809          | 2/1             | 238.70               | 0.35  | 0.80  | 0.048   | 0.035    |
|               |               | N               | 10                   | 10    | 10    | 10      | 10       |
|               |               | Mean            | 227.81               | 0.38  | 0.84  | 0.055   | 0.032    |
|               |               | Sdev            | 11.403               | 0.024 | 0.050 | 0.0083  | 0.0030   |
| 200 mg/kg     |               |                 |                      |       |       |         |          |
|               | 2810          | 3/1             | 218.20               | 0.37  | 0.85  | 0.043   | 0.034    |
|               | 2811          | 3/1             | 237.90               | 0.30  | 0.78  | 0.047   | 0.036    |
|               | 2812          | 3/1             | 235.20               | 0.35  | 0.86  | 0.043   | 0.033    |
|               | 2813          | 3/1             | 240.00               | 0.35  | 0.78  | 0.050   | 0.030    |
|               | 2814          | 3/1             | 213.00               | 0.32  | 0.87  | 0.041   | 0.026    |
|               | 2815          | 3/1             | 219.20               | 0.37  | 0.80  | 0.051   | 0.022    |
|               | 2816          | 3/1             | 231.50               | 0.35  | 0.84  | 0.050   | 0.037    |
|               | 2817          | 3/1             | 238.10               | 0.36  | 0.80  | 0.063   | 0.029    |
|               | 2818          | 3/1             | 233.20               | 0.35  | 0.76  | 0.050   | 0.028    |
|               | 2819          | 3/1             | 221.90               | 0.41  | 0.84  | 0.051   | 0.035    |

Note: Data collected using grace days.

CONFIDENTIAL

Appendix 9  
 Relative Organ Weights (% Body Weight)  
 Test period  
 Days 29 Interim Sacrifice

Fexinidazole

Study Number: 0504-2007

| Dose Level    | Animal Number | Group/ Subgroup | Terminal Body Wt (g) | HEART | BRAIN | OVARIES | ADRENALS |
|---------------|---------------|-----------------|----------------------|-------|-------|---------|----------|
| F e m a l e s |               |                 |                      |       |       |         |          |
| 200 mg/kg     |               |                 | N 10                 | 10    | 10    | 10      | 10       |
|               |               |                 | Mean 228.82          | 0.35  | 0.82  | 0.049   | 0.031    |
|               |               |                 | Sdev 9.799           | 0.028 | 0.038 | 0.0062  | 0.0047   |
| 800 mg/kg     |               |                 |                      |       |       |         |          |
|               | 2820          | 4/1             | 207.90               | 0.40  | 0.91  | 0.059   | 0.029    |
|               | 2821          | 4/1             | 195.40               | 0.34  | 0.95  | 0.046   | 0.032    |
|               | 2822          | 4/1             | 228.20               | 0.35  | 0.78  | 0.059   | 0.032    |
|               | 2823          | 4/1             | 248.60               | 0.35  | 0.75  | 0.051   | 0.032    |
|               | 2825          | 4/1             | 213.50               | 0.36  | 0.93  | 0.060   | 0.032    |
|               | 2826          | 4/1             | 212.30               | 0.35  | 0.86  | 0.052   | 0.032    |
|               | 2827          | 4/1             | 223.50               | 0.38  | 0.85  | 0.050   | 0.031    |
|               | 2828          | 4/1             | 219.90               | 0.40  | 0.83  | 0.064   | 0.032    |
|               | 2829          | 4/1             | 220.00               | 0.34  | 0.85  | 0.051   | 0.029    |
|               |               |                 | N 9                  | 9     | 9     | 9       | 9        |
|               |               |                 | Mean 218.81          | 0.36  | 0.86  | 0.055   | 0.031    |
|               |               |                 | Sdev 14.739          | 0.024 | 0.066 | 0.0059  | 0.0012   |

Note: Data collected using grace days.

CONFIDENTIAL

Appendix 9  
Relative Organ Weights (% Body Weight)  
Test period  
Days 43 Final Sacrifice

Fexinidazole

Study Number: 0504-2007

| Dose Level | Animal Number | Group/Subgroup | Terminal Body Wt (g) | SPLEEN | KIDNEYS | LIVER | THYMUS | HEART |
|------------|---------------|----------------|----------------------|--------|---------|-------|--------|-------|
| M a l e s  |               |                |                      |        |         |       |        |       |
| vehicle    | 2745          | 1/1            | 405.30               | 0.16   | 0.72    | 2.40  | 0.116  | 0.33  |
|            | 2746          | 1/1            | 370.80               | 0.14   | 0.69    | 2.43  | 0.124  | 0.34  |
|            | 2747          | 1/1            | 436.60               | 0.17   | 0.72    | 2.71  | 0.108  | 0.33  |
|            | 2748          | 1/1            | 458.60               | 0.12   | 0.53    | 2.00  | 0.096  | 0.31  |
|            | 2749          | 1/1            | 363.60               | 0.20   | 0.93    | 3.42  | 0.140  | 0.43  |
|            |               | N              | 5                    | 5      | 5       | 5     | 5      | 5     |
|            |               | Mean           | 406.98               | 0.16   | 0.72    | 2.59  | 0.117  | 0.35  |
|            |               | Sdev           | 41.035               | 0.030  | 0.140   | 0.526 | 0.0168 | 0.046 |
| 800 mg/kg  | 2780          | 4/1            | 369.00               | 0.17   | 0.70    | 2.78  | 0.144  | 0.33  |
|            | 2781          | 4/1            | 341.60               | 0.24   | 0.72    | 2.67  | 0.114  | 0.40  |
|            | 2782          | 4/1            | 359.30               | 0.16   | 0.72    | 3.34  | 0.075  | 0.37  |
|            | 2783          | 4/1            | 407.10               | 0.17   | 0.74    | 2.74  | 0.103  | 0.35  |
|            | 2784          | 4/1            | 385.50               | 0.19   | 0.71    | 2.53  | 0.114  | 0.35  |
|            |               | N              | 5                    | 5      | 5       | 5     | 5      | 5     |
|            |               | Mean           | 372.50               | 0.19   | 0.72    | 2.81  | 0.110  | 0.36  |
|            |               | Sdev           | 25.037               | 0.029  | 0.016   | 0.310 | 0.0246 | 0.026 |

Note: Data collected using grace days.

CONFIDENTIAL

Appendix 9  
Relative Organ Weights (% Body Weight)  
Test period  
Days 43 Final Sacrifice

Fexinidazole

Study Number: 0504-2007

| Dose Level | Animal Number | Group/Subgroup | Terminal Body Wt (g) | BRAIN | TESTES | PROSTATE | ADRENALS |
|------------|---------------|----------------|----------------------|-------|--------|----------|----------|
| M a l e s  |               |                |                      |       |        |          |          |
| vehicle    | 2745          | 1/1            | 405.30               | 0.51  | 0.77   | 0.19     | 0.013    |
|            | 2746          | 1/1            | 370.80               | 0.57  | 0.84   | 0.11     | 0.012    |
|            | 2747          | 1/1            | 436.60               | 0.45  | 0.82   | 0.14     | 0.014    |
|            | 2748          | 1/1            | 458.60               | 0.42  | 0.76   | 0.10     | 0.011    |
|            | 2749          | 1/1            | 363.60               | 0.56  | 1.01   | 0.20     | 0.021    |
|            |               | N              | 5                    | 5     | 5      | 5        | 5        |
|            |               | Mean           | 406.98               | 0.50  | 0.84   | 0.15     | 0.014    |
|            |               | Sdev           | 41.035               | 0.065 | 0.099  | 0.046    | 0.0040   |
| 800 mg/kg  | 2780          | 4/1            | 369.00               | 0.56  | 0.93   | 0.14     | 0.018    |
|            | 2781          | 4/1            | 341.60               | 0.61  | 1.11   | 0.19     | 0.020    |
|            | 2782          | 4/1            | 359.30               | 0.58  | 0.94   | 0.19     | 0.014    |
|            | 2783          | 4/1            | 407.10               | 0.51  | 0.97   | 0.15     | 0.017    |
|            | 2784          | 4/1            | 385.50               | 0.54  | 0.81   | 0.19     | 0.015    |
|            |               | N              | 5                    | 5     | 5      | 5        | 5        |
|            |               | Mean           | 372.50               | 0.56  | 0.95   | 0.17     | 0.017    |
|            |               | Sdev           | 25.037               | 0.042 | 0.107  | 0.023    | 0.0024   |

Note: Data collected using grace days.

CONFIDENTIAL

Appendix 9  
 Relative Organ Weights (% Body Weight)  
 Test period  
 Days 43 Final Sacrifice

Fexinidazole

Study Number: 0504-2007

| Dose Level    | Animal Number | Group/Subgroup | Terminal Body Wt (g) | SPLEEN | KIDNEYS | LIVER | THYMUS |
|---------------|---------------|----------------|----------------------|--------|---------|-------|--------|
| F e m a l e s |               |                |                      |        |         |       |        |
| vehicle       | 2795          | 1/1            | 231.10               | 0.23   | 0.70    | 2.70  | 0.108  |
|               | 2796          | 1/1            | 233.10               | 0.22   | 0.75    | 2.62  | 0.163  |
|               | 2797          | 1/1            | 227.50               | 0.22   | 0.78    | 2.93  | 0.114  |
|               | 2798          | 1/1            | 255.10               | 0.22   | 0.65    | 2.49  | 0.102  |
|               | 2799          | 1/1            | 250.30               | 0.21   | 0.80    | 2.60  | 0.144  |
|               |               | N              | 5                    | 5      | 5       | 5     | 5      |
|               |               | Mean           | 239.42               | 0.22   | 0.74    | 2.67  | 0.126  |
|               |               | Sdev           | 12.405               | 0.007  | 0.061   | 0.164 | 0.0261 |
| 800 mg/kg     | 2830          | 4/1            | 245.00               | 0.33   | 0.70    | 2.93  | 0.110  |
|               | 2831          | 4/1            | 206.80               | 0.22   | 0.74    | 3.02  | 0.111  |
|               | 2832          | 4/1            | 213.00               | 0.21   | 0.73    | 2.92  | 0.150  |
|               | 2833          | 4/1            | 229.20               | 0.21   | 0.61    | 2.70  | 0.118  |
|               | 2834          | 4/1            | 228.70               | 0.19   | 0.68    | 2.93  | 0.179  |
|               |               | N              | 5                    | 5      | 5       | 5     | 5      |
|               |               | Mean           | 224.54               | 0.23   | 0.69    | 2.90  | 0.134  |
|               |               | Sdev           | 15.046               | 0.054  | 0.052   | 0.120 | 0.0303 |

Note: Data collected using grace days.

CONFIDENTIAL

Appendix 9  
Relative Organ Weights (% Body Weight)  
Test period  
Days 43 Final Sacrifice

Fexinidazole

Study Number: 0504-2007

| Dose Level    | Animal Number | Group/ Subgroup | Terminal Body Wt (g) | HEART | BRAIN | OVARIES | ADRENALS |
|---------------|---------------|-----------------|----------------------|-------|-------|---------|----------|
| F e m a l e s |               |                 |                      |       |       |         |          |
| vehicle       | 2795          | 1/1             | 231.10               | 0.35  | 0.82  | 0.041   | 0.031    |
|               | 2796          | 1/1             | 233.10               | 0.39  | 0.82  | 0.045   | 0.033    |
|               | 2797          | 1/1             | 227.50               | 0.39  | 0.94  | 0.053   | 0.038    |
|               | 2798          | 1/1             | 255.10               | 0.36  | 0.78  | 0.043   | 0.028    |
|               | 2799          | 1/1             | 250.30               | 0.37  | 0.77  | 0.033   | 0.026    |
|               |               | N               | 5                    | 5     | 5     | 5       | 5        |
|               |               | Mean            | 239.42               | 0.37  | 0.83  | 0.043   | 0.031    |
|               |               | Sdev            | 12.405               | 0.014 | 0.067 | 0.0073  | 0.0044   |
| 800 mg/kg     | 2830          | 4/1             | 245.00               | 0.38  | 0.73  | 0.040   | 0.026    |
|               | 2831          | 4/1             | 206.80               | 0.39  | 0.92  | 0.045   | 0.028    |
|               | 2832          | 4/1             | 213.00               | 0.40  | 0.84  | 0.040   | 0.030    |
|               | 2833          | 4/1             | 229.20               | 0.33  | 0.83  | 0.040   | 0.024    |
|               | 2834          | 4/1             | 228.70               | 0.38  | 0.82  | 0.042   | 0.025    |
|               |               | N               | 5                    | 5     | 5     | 5       | 5        |
|               |               | Mean            | 224.54               | 0.37  | 0.83  | 0.041   | 0.027    |
|               |               | Sdev            | 15.046               | 0.028 | 0.070 | 0.0022  | 0.0025   |

Note: Data collected using grace days.

## ***Appendix 10 Gross Necropsy and Microscopic Observations***



CONFIDENTIAL

Appendix 10  
Individual Animal Microscopic vs. Gross Observations

Fexinidazole

Study Number: 0504-2007

ANIMAL: 2735                      SEX: Male                      GROUP: 1                      DOSE LEVEL: vehicle  
DAY OF DEATH: 30 Test period                      STATUS: Scheduled phase sacrifice # 1                      TERMINAL BODY WEIGHT (g) : 380.9

| Tissue                  | Gross observations/comments     | Correlated Microscopic Observations                                                               |
|-------------------------|---------------------------------|---------------------------------------------------------------------------------------------------|
| GENER. CONDITION . . .  | GOOD                            | No micropathology observations on tissue.                                                         |
| HARDERIAN GLANDS . . .  | No gross observations on tissue | PORPHYRIN DEPOSITS, Minimal, Multifocal.                                                          |
| LIVER . . . . .         | No gross observations on tissue | CHRONIC INFLAMMATION, Minimal, Multifocal.<br>HEPATOCELLULAR VACUOLATION, PERIPORTAL,<br>Minimal. |
| MANDIBULAR L.N. . . . . | No gross observations on tissue | PLASMACYTOSIS, Moderate, Diffuse,<br>Unilateral..                                                 |
| LUNG . . . . .          | No gross observations on tissue | ALVEOLAR MACROPHAGE INFILTRATION, Minimal,<br>Multifocal.                                         |
| OPTIC NERVES . . . . .  | No gross observations on tissue | Tissue is unremarkable.<br><br>sections of optic nerves are included in<br>block 15.              |
| PARATHYROIDS . . . . .  | No gross observations on tissue | ONLY ONE PARATHYROID AVAILABLE FOR<br>EXAMINATION, Present.                                       |
| SPLEEN . . . . .        | No gross observations on tissue | EXTRAMEDULLARY HEMOPOIESIS, Minimal,<br>Multifocal.                                               |

The following tissues have no gross observations and were not examined microscopically:  
No tissue to list.

CONFIDENTIAL

Appendix 10  
Individual Animal Microscopic vs. Gross Observations

Fexinidazole

Study Number: 0504-2007

---

|                              |                                       |                            |                     |
|------------------------------|---------------------------------------|----------------------------|---------------------|
| ANIMAL: 2735                 | SEX: Male                             | GROUP: 1                   | DOSE LEVEL: vehicle |
| DAY OF DEATH: 30 Test period | STATUS: Scheduled phase sacrifice # 1 | TERMINAL BODY WEIGHT (g) : | 380.9               |

---

| Tissue | Gross observations/comments | Correlated Microscopic Observations |
|--------|-----------------------------|-------------------------------------|
|--------|-----------------------------|-------------------------------------|

---

The following tissues have no gross observations and were marked as unremarkable microscopically:

|                 |                  |                 |                  |                  |
|-----------------|------------------|-----------------|------------------|------------------|
| ADRENALS        | AORTA            | BONE MARROW     | BRAIN            | CECUM            |
| COLON           | DIAPHRAGM        | DUODENUM        | EPIDIDYMIDES     | ESOPHAGUS        |
| EYES            | FEMUR            | HEART           | ILEUM            | JEJUNUM          |
| KIDNEYS         | MESENTERIC L.N.  | MAMMARY GLAND   | SKELETAL MUSCLE  | SCIATIC NERVE    |
| PANCREAS        | PITUITARY        | PROSTATE        | SPINAL CORD CERV | SPINAL CORD THOR |
| MANDIBULAR S.G. | PAROTIDS         | STIFLE JOINT    | SKIN             | STOMACH          |
| STERNUM         | SEMINAL VESICLES | TESTES          | THYROIDS         | THYMUS           |
| TONGUE          | TRACHEA          | URINARY BLADDER |                  |                  |

CONFIDENTIAL

Appendix 10  
Individual Animal Microscopic vs. Gross Observations

Fexinidazole

Study Number: 0504-2007

ANIMAL: 2736                      SEX: Male                      GROUP: 1                      DOSE LEVEL: vehicle  
DAY OF DEATH: 30 Test period                      STATUS: Scheduled phase sacrifice # 1                      TERMINAL BODY WEIGHT (g) : 396.8

| Tissue                  | Gross observations/comments     | Correlated Microscopic Observations                                                                                 |
|-------------------------|---------------------------------|---------------------------------------------------------------------------------------------------------------------|
| GENER. CONDITION . . .  | GOOD                            | No micropathology observations on tissue.                                                                           |
| KIDNEYS . . . . .       | No gross observations on tissue | CHRONIC INFLAMMATION, Minimal, Multifocal.<br><br>CORTICAL TUBULAR REGENERATIVE BASOPHILIA,<br>Minimal, Multifocal. |
| HARDERIAN GLANDS . . .  | No gross observations on tissue | PORPHYRIN DEPOSITS, Minimal, Multifocal.                                                                            |
| LIVER . . . . .         | No gross observations on tissue | CHRONIC INFLAMMATION, Minimal, Multifocal.                                                                          |
| MANDIBULAR L.N. . . . . | No gross observations on tissue | PLASMACYTOSIS, Moderate, Diffuse.                                                                                   |
| PROSTATE . . . . .      | No gross observations on tissue | LYMPHOCYTIC INFILTRATION, Minimal,<br>Multifocal.                                                                   |
| PARATHYROIDS . . . . .  | No gross observations on tissue | ONLY ONE PARATHYROID AVAILABLE FOR<br>EXAMINATION, Present.                                                         |
| SPLEEN . . . . .        | No gross observations on tissue | EXTRAMEDULLARY HEMOPOIESIS, Minimal,<br>Multifocal.                                                                 |

The following tissues have no gross observations and were not examined microscopically:  
No tissue to list.

CONFIDENTIAL

Appendix 10  
Individual Animal Microscopic vs. Gross Observations

Fexinidazole

Study Number: 0504-2007

---

|                              |                                       |                            |                     |
|------------------------------|---------------------------------------|----------------------------|---------------------|
| ANIMAL: 2736                 | SEX: Male                             | GROUP: 1                   | DOSE LEVEL: vehicle |
| DAY OF DEATH: 30 Test period | STATUS: Scheduled phase sacrifice # 1 | TERMINAL BODY WEIGHT (g) : | 396.8               |

---

| Tissue | Gross observations/comments | Correlated Microscopic Observations |
|--------|-----------------------------|-------------------------------------|
|--------|-----------------------------|-------------------------------------|

---

The following tissues have no gross observations and were marked as unremarkable microscopically:

|                 |                  |                 |                  |                  |
|-----------------|------------------|-----------------|------------------|------------------|
| ADRENALS        | AORTA            | BONE MARROW     | BRAIN            | CECUM            |
| COLON           | DIAPHRAGM        | DUODENUM        | EPIDIDYMIDES     | ESOPHAGUS        |
| EYES            | FEMUR            | HEART           | ILEUM            | JEJUNUM          |
| MESENTERIC L.N. | LUNG             | MAMMARY GLAND   | SKELETAL MUSCLE  | SCIATIC NERVE    |
| OPTIC NERVES    | PANCREAS         | PITUITARY       | SPINAL CORD CERV | SPINAL CORD THOR |
| MANDIBULAR S.G. | PAROTIDS         | STIFLE JOINT    | SKIN             | STOMACH          |
| STERNUM         | SEMINAL VESICLES | TESTES          | THYROIDS         | THYMUS           |
| TONGUE          | TRACHEA          | URINARY BLADDER |                  |                  |

CONFIDENTIAL

Appendix 10  
Individual Animal Microscopic vs. Gross Observations

Fexinidazole

Study Number: 0504-2007

ANIMAL: 2737                      SEX: Male                      GROUP: 1                      DOSE LEVEL: vehicle  
DAY OF DEATH: 30 Test period                      STATUS: Scheduled phase sacrifice # 1                      TERMINAL BODY WEIGHT (g) : 422.8

| Tissue                  | Gross observations/comments     | Correlated Microscopic Observations                                                                                                                                                                |
|-------------------------|---------------------------------|----------------------------------------------------------------------------------------------------------------------------------------------------------------------------------------------------|
| GENER. CONDITION . . .  | GOOD                            | No micropathology observations on tissue.                                                                                                                                                          |
| HEART . . . . .         | No gross observations on tissue | MYOCARDIAL INFLAMMATION, Minimal, Focal. /<br>of septum.                                                                                                                                           |
| LIVER . . . . .         | No gross observations on tissue | CHRONIC INFLAMMATION, Minimal, Multifocal.                                                                                                                                                         |
| MANDIBULAR L.N. . . . . | No gross observations on tissue | PLASMACYTOSIS, Marked, Diffuse,<br>Unilateral..                                                                                                                                                    |
| LUNG . . . . .          | No gross observations on tissue | ALVEOLAR HEMORRHAGE, Minimal, Multifocal.<br>/ with associated hematoidin crystals.<br><br>ACUTE INFLAMMATION, Slight, Multifocal.<br><br>ALVEOLAR MACROPHAGE INFILTRATION, Slight,<br>Multifocal. |
| OPTIC NERVES . . . . .  | No gross observations on tissue | ONLY ONE NERVE IS AVAILABLE FOR<br>EXAMINATION, Present.                                                                                                                                           |
| PANCREAS . . . . .      | No gross observations on tissue | CHRONIC INFLAMMATION, Minimal, Focal.                                                                                                                                                              |

The following tissues have no gross observations and were not examined microscopically:  
No tissue to list.

CONFIDENTIAL

Appendix 10  
Individual Animal Microscopic vs. Gross Observations

Fexinidazole

Study Number: 0504-2007

---

|                              |                                       |                            |                     |
|------------------------------|---------------------------------------|----------------------------|---------------------|
| ANIMAL: 2737                 | SEX: Male                             | GROUP: 1                   | DOSE LEVEL: vehicle |
| DAY OF DEATH: 30 Test period | STATUS: Scheduled phase sacrifice # 1 | TERMINAL BODY WEIGHT (g) : | 422.8               |

---

| Tissue | Gross observations/comments | Correlated Microscopic Observations |
|--------|-----------------------------|-------------------------------------|
|--------|-----------------------------|-------------------------------------|

---

The following tissues have no gross observations and were marked as unremarkable microscopically:

|                  |                 |                  |                  |                  |
|------------------|-----------------|------------------|------------------|------------------|
| ADRENALS         | AORTA           | BONE MARROW      | BRAIN            | CECUM            |
| COLON            | DIAPHRAGM       | DUODENUM         | EPIDIDYMIDES     | ESOPHAGUS        |
| EYES             | FEMUR           | ILEUM            | JEJUNUM          | KIDNEYS          |
| HARDERIAN GLANDS | MESENTERIC L.N. | MAMMARY GLAND    | SKELETAL MUSCLE  | SCIATIC NERVE    |
| PITUITARY        | PROSTATE        | PARATHYROIDS     | SPINAL CORD CERV | SPINAL CORD THOR |
| MANDIBULAR S.G.  | PAROTIDS        | STIFLE JOINT     | SKIN             | SPLEEN           |
| STOMACH          | STERNUM         | SEMINAL VESICLES | TESTES           | THYROIDS         |
| THYMUS           | TONGUE          | TRACHEA          | URINARY BLADDER  |                  |

CONFIDENTIAL

Appendix 10  
Individual Animal Microscopic vs. Gross Observations

Fexinidazole

Study Number: 0504-2007

ANIMAL: 2738                      SEX: Male                      GROUP: 1                      DOSE LEVEL: vehicle  
DAY OF DEATH: 30 Test period                      STATUS: Scheduled phase sacrifice # 1                      TERMINAL BODY WEIGHT (g) : 383.8

| Tissue                  | Gross observations/comments     | Correlated Microscopic Observations                                                            |
|-------------------------|---------------------------------|------------------------------------------------------------------------------------------------|
| ADRENALS . . . . .      | No gross observations on tissue | CORTICAL VACUOLATION, Slight, Diffuse.                                                         |
| GENER. CONDITION . . .  | GOOD                            | No micropathology observations on tissue.                                                      |
| HARDERIAN GLANDS . . .  | No gross observations on tissue | PORPHYRIN DEPOSITS, Minimal, Multifocal.<br><br>LYMPHOCYTIC INFILTRATION, Minimal, Multifocal. |
| LIVER . . . . .         | No gross observations on tissue | CHRONIC INFLAMMATION, Minimal, Multifocal.<br><br>HEPATOCELLULAR VACUOLATION,DIFFUSE, Minimal. |
| MANDIBULAR L.N. . . . . | No gross observations on tissue | PLASMACYTOSIS, Slight, Diffuse.                                                                |
| LUNG . . . . .          | No gross observations on tissue | ALVEOLAR MACROPHAGE INFILTRATION, Minimal, Multifocal.                                         |
| SKELETAL MUSCLE . . . . | No gross observations on tissue | CHRONIC INFLAMMATION, Minimal, Multifocal.                                                     |

The following tissues have no gross observations and were not examined microscopically:  
No tissue to list.

The following tissues have no gross observations and were marked as unremarkable microscopically:  
AORTA                      BONE MARROW                      BRAIN                      CECUM                      COLON

CONFIDENTIAL

Appendix 10  
Individual Animal Microscopic vs. Gross Observations

Fexinidazole

Study Number: 0504-2007

---

|                              |                                       |                            |                     |
|------------------------------|---------------------------------------|----------------------------|---------------------|
| ANIMAL: 2738                 | SEX: Male                             | GROUP: 1                   | DOSE LEVEL: vehicle |
| DAY OF DEATH: 30 Test period | STATUS: Scheduled phase sacrifice # 1 | TERMINAL BODY WEIGHT (g) : | 383.8               |

---

| Tissue | Gross observations/comments | Correlated Microscopic Observations |
|--------|-----------------------------|-------------------------------------|
|--------|-----------------------------|-------------------------------------|

---

The following tissues have no gross observations and were marked as unremarkable microscopically:

|                 |               |                  |                  |                  |
|-----------------|---------------|------------------|------------------|------------------|
| DIAPHRAGM       | DUODENUM      | EPIDIDYMIDES     | ESOPHAGUS        | EYES             |
| FEMUR           | HEART         | ILEUM            | JEJUNUM          | KIDNEYS          |
| MESENTERIC L.N. | MAMMARY GLAND | SCIATIC NERVE    | OPTIC NERVES     | PANCREAS         |
| PITUITARY       | PROSTATE      | PARATHYROIDS     | SPINAL CORD CERV | SPINAL CORD THOR |
| MANDIBULAR S.G. | PAROTIDS      | STIFLE JOINT     | SKIN             | SPLEEN           |
| STOMACH         | STERNUM       | SEMINAL VESICLES | TESTES           | THYROIDS         |
| THYMUS          | TONGUE        | TRACHEA          | URINARY BLADDER  |                  |



CONFIDENTIAL

Appendix 10  
Individual Animal Microscopic vs. Gross Observations

Fexinidazole

Study Number: 0504-2007

ANIMAL: 2739                      SEX: Male                      GROUP: 1                      DOSE LEVEL: vehicle  
DAY OF DEATH: 30 Test period                      STATUS: Scheduled phase sacrifice # 1                      TERMINAL BODY WEIGHT (g) : 419.0

| Tissue                     | Gross observations/comments     | Correlated Microscopic Observations                                                            |
|----------------------------|---------------------------------|------------------------------------------------------------------------------------------------|
| AORTA . . . . .            | No gross observations on tissue | INFLAMMATION OF ADJACENT TISSUES, Minimal, Multifocal.                                         |
| GENER. CONDITION . . . . . | GOOD                            | No micropathology observations on tissue.                                                      |
| HEART . . . . .            | No gross observations on tissue | MYOCARDIAL INFLAMMATION, Minimal, Multifocal.                                                  |
| HARDERIAN GLANDS . . . . . | No gross observations on tissue | PORPHYRIN DEPOSITS, Minimal, Multifocal.                                                       |
| LIVER . . . . .            | No gross observations on tissue | CHRONIC INFLAMMATION, Minimal, Multifocal.<br>HEPATOCELLULAR VACUOLATION, PERIPORTAL, Minimal. |
| MANDIBULAR L.N. . . . .    | No gross observations on tissue | PLASMACYTOSIS, Slight, Diffuse.                                                                |
| THYROIDS . . . . .         | No gross observations on tissue | LYMPHOCYTIC INFILTRATION, Minimal, Focal, Unilateral..                                         |

The following tissues have no gross observations and were not examined microscopically:  
No tissue to list.

The following tissues have no gross observations and were marked as unremarkable microscopically:  
ADRENALS                      BONE MARROW                      BRAIN                      CECUM                      COLON

CONFIDENTIAL

Appendix 10  
Individual Animal Microscopic vs. Gross Observations

Fexinidazole

Study Number: 0504-2007

---

|                              |                                       |                            |                     |
|------------------------------|---------------------------------------|----------------------------|---------------------|
| ANIMAL: 2739                 | SEX: Male                             | GROUP: 1                   | DOSE LEVEL: vehicle |
| DAY OF DEATH: 30 Test period | STATUS: Scheduled phase sacrifice # 1 | TERMINAL BODY WEIGHT (g) : | 419.0               |

---

| Tissue | Gross observations/comments | Correlated Microscopic Observations |
|--------|-----------------------------|-------------------------------------|
|--------|-----------------------------|-------------------------------------|

---

The following tissues have no gross observations and were marked as unremarkable microscopically:

|                  |                 |                 |                  |                  |
|------------------|-----------------|-----------------|------------------|------------------|
| DIAPHRAGM        | DUODENUM        | EPIDIDYMIDES    | ESOPHAGUS        | EYES             |
| FEMUR            | ILEUM           | JEJUNUM         | KIDNEYS          | MESENTERIC L.N.  |
| LUNG             | MAMMARY GLAND   | SKELETAL MUSCLE | SCIATIC NERVE    | OPTIC NERVES     |
| PANCREAS         | PITUITARY       | PROSTATE        | PARATHYROIDS     | SPINAL CORD CERV |
| SPINAL CORD THOR | MANDIBULAR S.G. | PAROTIDS        | STIFLE JOINT     | SKIN             |
| SPLEEN           | STOMACH         | STERNUM         | SEMINAL VESICLES | TESTES           |
| THYMUS           | TONGUE          | TRACHEA         | URINARY BLADDER  |                  |

CONFIDENTIAL

Appendix 10  
Individual Animal Microscopic vs. Gross Observations

Fexinidazole

Study Number: 0504-2007

ANIMAL: 2740                      SEX: Male                      GROUP: 1                      DOSE LEVEL: vehicle  
DAY OF DEATH: 29 Test period                      STATUS: Scheduled phase sacrifice # 1                      TERMINAL BODY WEIGHT (g) : 410.5

| Tissue                    | Gross observations/comments     | Correlated Microscopic Observations                           |
|---------------------------|---------------------------------|---------------------------------------------------------------|
| GENER. CONDITION . . .    | GOOD                            | No micropathology observations on tissue.                     |
| KIDNEYS . . . . .         | No gross observations on tissue | CHRONIC INFLAMMATION, Minimal, Multifocal, Unilateral right.. |
| LIVER . . . . .           | No gross observations on tissue | CHRONIC INFLAMMATION, Minimal, Multifocal.                    |
| MANDIBULAR L.N. . . . .   | No gross observations on tissue | PLASMACYTOSIS, Moderate, Diffuse, Unilateral..                |
| PARATHYROIDS . . . . .    | No gross observations on tissue | ONLY ONE PARATHYROID AVAILABLE FOR EXAMINATION, Present.      |
| URINARY BLADDER . . . . . | No gross observations on tissue | PROTEINACEOUS PLUG, Present.                                  |

The following tissues have no gross observations and were not examined microscopically:  
No tissue to list.

The following tissues have no gross observations and were marked as unremarkable microscopically:

|                  |                  |                 |               |                  |
|------------------|------------------|-----------------|---------------|------------------|
| ADRENALS         | AORTA            | BONE MARROW     | BRAIN         | CECUM            |
| COLON            | DIAPHRAGM        | DUODENUM        | EPIDIDYMIDES  | ESOPHAGUS        |
| EYES             | FEMUR            | HEART           | ILEUM         | JEJUNUM          |
| HARDERIAN GLANDS | MESENTERIC L.N.  | LUNG            | MAMMARY GLAND | SKELETAL MUSCLE  |
| SCIATIC NERVE    | OPTIC NERVES     | PANCREAS        | PITUITARY     | PROSTATE         |
| SPINAL CORD CERV | SPINAL CORD THOR | MANDIBULAR S.G. | PAROTIDS      | STIFLE JOINT     |
| SKIN             | SPLEEN           | STOMACH         | STERNUM       | SEMINAL VESICLES |
| TESTES           | THYROIDS         | THYMUS          | TONGUE        | TRACHEA          |

CONFIDENTIAL

Appendix 10  
Individual Animal Microscopic vs. Gross Observations

Fexinidazole

Study Number: 0504-2007

---

|                              |                                       |                            |                     |
|------------------------------|---------------------------------------|----------------------------|---------------------|
| ANIMAL: 2741                 | SEX: Male                             | GROUP: 1                   | DOSE LEVEL: vehicle |
| DAY OF DEATH: 29 Test period | STATUS: Scheduled phase sacrifice # 1 | TERMINAL BODY WEIGHT (g) : | 381.1               |

---

| Tissue                     | Gross observations/comments     | Correlated Microscopic Observations                                                           |
|----------------------------|---------------------------------|-----------------------------------------------------------------------------------------------|
| EPIDIDYMIDES . . . . .     | No gross observations on tissue | LYMPHOCYTIC INFILTRATION, Minimal, Multifocal.                                                |
| GENER. CONDITION . . . . . | GOOD                            | No micropathology observations on tissue.                                                     |
| HEART . . . . .            | No gross observations on tissue | MYOCARDIAL INFLAMMATION, Minimal, Multifocal.                                                 |
| KIDNEYS . . . . .          | No gross observations on tissue | CORTICAL TUBULAR REGENERATIVE BASOPHILIA, Minimal, Multifocal.                                |
| HARDERIAN GLANDS . . . . . | No gross observations on tissue | PORPHYRIN DEPOSITS, Minimal, Multifocal.                                                      |
| LIVER . . . . .            | No gross observations on tissue | CHRONIC INFLAMMATION, Slight, Multifocal.<br>HEPATOCELLULAR VACUOLATION, PERIportal, Minimal. |
| OPTIC NERVES . . . . .     | No gross observations on tissue | Tissue is missing.                                                                            |
| PROSTATE . . . . .         | No gross observations on tissue | LYMPHOCYTIC INFILTRATION, Minimal, Multifocal.                                                |

The following tissues have no gross observations and were not examined microscopically:  
No tissue to list.

CONFIDENTIAL

Appendix 10  
Individual Animal Microscopic vs. Gross Observations

Fexinidazole

Study Number: 0504-2007

---

|                              |                                       |                            |                     |
|------------------------------|---------------------------------------|----------------------------|---------------------|
| ANIMAL: 2741                 | SEX: Male                             | GROUP: 1                   | DOSE LEVEL: vehicle |
| DAY OF DEATH: 29 Test period | STATUS: Scheduled phase sacrifice # 1 | TERMINAL BODY WEIGHT (g) : | 381.1               |

---

| Tissue | Gross observations/comments | Correlated Microscopic Observations |
|--------|-----------------------------|-------------------------------------|
|--------|-----------------------------|-------------------------------------|

---

The following tissues have no gross observations and were marked as unremarkable microscopically:

|           |                  |                  |                  |                 |
|-----------|------------------|------------------|------------------|-----------------|
| ADRENALS  | AORTA            | BONE MARROW      | BRAIN            | CECUM           |
| COLON     | DIAPHRAGM        | DUODENUM         | ESOPHAGUS        | EYES            |
| FEMUR     | ILEUM            | JEJUNUM          | MANDIBULAR L.N.  | MESENTERIC L.N. |
| LUNG      | MAMMARY GLAND    | SKELETAL MUSCLE  | SCIATIC NERVE    | PANCREAS        |
| PITUITARY | PARATHYROIDS     | SPINAL CORD CERV | SPINAL CORD THOR | MANDIBULAR S.G. |
| PAROTIDS  | STIFLE JOINT     | SKIN             | SPLEEN           | STOMACH         |
| STERNUM   | SEMINAL VESICLES | TESTES           | THYROIDS         | THYMUS          |
| TONGUE    | TRACHEA          | URINARY BLADDER  |                  |                 |

CONFIDENTIAL

Appendix 10  
Individual Animal Microscopic vs. Gross Observations

Fexinidazole

Study Number: 0504-2007

ANIMAL: 2742                      SEX: Male                      GROUP: 1                      DOSE LEVEL: vehicle  
DAY OF DEATH: 29 Test period                      STATUS: Scheduled phase sacrifice # 1                      TERMINAL BODY WEIGHT (g) : 348.7

| Tissue                 | Gross observations/comments     | Correlated Microscopic Observations                                                                |
|------------------------|---------------------------------|----------------------------------------------------------------------------------------------------|
| GENER. CONDITION . . . | GOOD                            | No micropathology observations on tissue.                                                          |
| HARDERIAN GLANDS . . . | No gross observations on tissue | LYMPHOCYTIC INFILTRATION, Minimal, Multifocal.                                                     |
| LIVER . . . . .        | No gross observations on tissue | CHRONIC INFLAMMATION, Minimal, Multifocal.<br>HEPATOCELLULAR VACUOLATION, PERIPORTAL, Minimal.     |
| LUNG . . . . .         | No gross observations on tissue | ACUTE INFLAMMATION, Minimal, Multifocal.<br>ALVEOLAR MACROPHAGE INFILTRATION, Minimal, Multifocal. |
| PROSTATE . . . . .     | No gross observations on tissue | LYMPHOCYTIC INFILTRATION, Minimal, Multifocal.                                                     |
| THYROIDS . . . . .     | No gross observations on tissue | LYMPHOCYTIC INFILTRATION, Minimal, Multifocal, Unilateral..                                        |

The following tissues have no gross observations and were not examined microscopically:  
No tissue to list.

The following tissues have no gross observations and were marked as unremarkable microscopically:  
ADRENALS                      AORTA                      BONE MARROW                      BRAIN                      CECUM

CONFIDENTIAL

Appendix 10  
Individual Animal Microscopic vs. Gross Observations

Fexinidazole

Study Number: 0504-2007

---

|                              |                                       |                            |                     |
|------------------------------|---------------------------------------|----------------------------|---------------------|
| ANIMAL: 2742                 | SEX: Male                             | GROUP: 1                   | DOSE LEVEL: vehicle |
| DAY OF DEATH: 29 Test period | STATUS: Scheduled phase sacrifice # 1 | TERMINAL BODY WEIGHT (g) : | 348.7               |

---

| Tissue | Gross observations/comments | Correlated Microscopic Observations |
|--------|-----------------------------|-------------------------------------|
|--------|-----------------------------|-------------------------------------|

---

The following tissues have no gross observations and were marked as unremarkable microscopically:

|                  |                  |                 |               |                  |
|------------------|------------------|-----------------|---------------|------------------|
| COLON            | DIAPHRAGM        | DUODENUM        | EPIDIDYMIDES  | ESOPHAGUS        |
| EYES             | FEMUR            | HEART           | ILEUM         | JEJUNUM          |
| KIDNEYS          | MANDIBULAR L.N.  | MESENTERIC L.N. | MAMMARY GLAND | SKELETAL MUSCLE  |
| SCIATIC NERVE    | OPTIC NERVES     | PANCREAS        | PITUITARY     | PARATHYROIDS     |
| SPINAL CORD CERV | SPINAL CORD THOR | MANDIBULAR S.G. | PAROTIDS      | STIFLE JOINT     |
| SKIN             | SPLEEN           | STOMACH         | STERNUM       | SEMINAL VESICLES |
| TESTES           | THYMUS           | TONGUE          | TRACHEA       | URINARY BLADDER  |

CONFIDENTIAL

Appendix 10  
Individual Animal Microscopic vs. Gross Observations

Fexinidazole

Study Number: 0504-2007

ANIMAL: 2743                      SEX: Male                      GROUP: 1                      DOSE LEVEL: vehicle  
DAY OF DEATH: 29 Test period                      STATUS: Scheduled phase sacrifice # 1                      TERMINAL BODY WEIGHT (g) : 373.7

| Tissue                  | Gross observations/comments     | Correlated Microscopic Observations                            |
|-------------------------|---------------------------------|----------------------------------------------------------------|
| GENER. CONDITION . . .  | GOOD                            | No micropathology observations on tissue.                      |
| KIDNEYS . . . . .       | No gross observations on tissue | CORTICAL TUBULAR REGENERATIVE BASOPHILIA, Minimal, Multifocal. |
| LIVER . . . . .         | No gross observations on tissue | CHRONIC INFLAMMATION, Minimal, Multifocal.                     |
| MANDIBULAR L.N. . . . . | No gross observations on tissue | PLASMACYTOSIS, Slight, Diffuse.                                |
| PARATHYROIDS . . . . .  | No gross observations on tissue | ONLY ONE PARATHYROID AVAILABLE FOR EXAMINATION, Present.       |
| SPLEEN . . . . .        | No gross observations on tissue | INFLAMMATION OF THE CAPSULE, Minimal, Focal, Chronic.          |

The following tissues have no gross observations and were not examined microscopically:  
No tissue to list.

The following tissues have no gross observations and were marked as unremarkable microscopically:

|                  |                  |                 |                  |                 |
|------------------|------------------|-----------------|------------------|-----------------|
| ADRENALS         | AORTA            | BONE MARROW     | BRAIN            | CECUM           |
| COLON            | DIAPHRAGM        | DUODENUM        | EPIDIDYMIDES     | ESOPHAGUS       |
| EYES             | FEMUR            | HEART           | ILEUM            | JEJUNUM         |
| HARDERIAN GLANDS | MESENTERIC L.N.  | LUNG            | MAMMARY GLAND    | SKELETAL MUSCLE |
| SCIATIC NERVE    | OPTIC NERVES     | PANCREAS        | PITUITARY        | PROSTATE        |
| SPINAL CORD CERV | SPINAL CORD THOR | MANDIBULAR S.G. | PAROTIDS         | STIFLE JOINT    |
| SKIN             | STOMACH          | STERNUM         | SEMINAL VESICLES | TESTES          |
| THYROIDS         | THYMUS           | TONGUE          | TRACHEA          | URINARY BLADDER |



CONFIDENTIAL

Appendix 10  
Individual Animal Microscopic vs. Gross Observations

Fexinidazole

Study Number: 0504-2007

ANIMAL: 2744                      SEX: Male                      GROUP: 1                      DOSE LEVEL: vehicle  
DAY OF DEATH: 29 Test period                      STATUS: Scheduled phase sacrifice # 1                      TERMINAL BODY WEIGHT (g) : 398.0

| Tissue                  | Gross observations/comments     | Correlated Microscopic Observations                                                                 |
|-------------------------|---------------------------------|-----------------------------------------------------------------------------------------------------|
| ADRENALS . . . . .      | No gross observations on tissue | CORTICAL VACUOLATION, Minimal, Multifocal.                                                          |
| GENER. CONDITION . . .  | GOOD                            | No micropathology observations on tissue.                                                           |
| KIDNEYS . . . . .       | No gross observations on tissue | CHRONIC INFLAMMATION, Minimal, Multifocal.<br><br>PYELITIS, Slight, Multifocal. / acute to chronic. |
| HARDERIAN GLANDS . . .  | No gross observations on tissue | PORPHYRIN DEPOSITS, Minimal, Multifocal.                                                            |
| LIVER . . . . .         | No gross observations on tissue | CHRONIC INFLAMMATION, Minimal, Multifocal.<br><br>HEPATOCELLULAR VACUOLATION, PERIportal, Minimal.  |
| MANDIBULAR L.N. . . . . | No gross observations on tissue | PLASMACYTOSIS, Moderate, Diffuse.                                                                   |
| LUNG . . . . .          | No gross observations on tissue | ALVEOLAR MACROPHAGE INFILTRATION, Minimal, Multifocal.                                              |
| MAMMARY GLAND . . . . . | No gross observations on tissue | NO MAMMARY TISSUE IN THE SECTION, Present.                                                          |
| OPTIC NERVES . . . . .  | No gross observations on tissue | Tissue is unremarkable.<br><br>sections of optic nerves are included in                             |

CONFIDENTIAL

Appendix 10  
Individual Animal Microscopic vs. Gross Observations

Fexinidazole

Study Number: 0504-2007

ANIMAL: 2744                      SEX: Male                      GROUP: 1                      DOSE LEVEL: vehicle  
DAY OF DEATH: 29 Test period                      STATUS: Scheduled phase sacrifice # 1                      TERMINAL BODY WEIGHT (g) : 398.0

| Tissue                 | Gross observations/comments     | Correlated Microscopic Observations                      |
|------------------------|---------------------------------|----------------------------------------------------------|
|                        |                                 | block 15.                                                |
| PROSTATE . . . . .     | No gross observations on tissue | LYMPHOCYTIC INFILTRATION, Slight, Multifocal.            |
| PARATHYROIDS . . . . . | No gross observations on tissue | ONLY ONE PARATHYROID AVAILABLE FOR EXAMINATION, Present. |
| SPLEEN . . . . .       | No gross observations on tissue | EXTRAMEDULLARY HEMOPOIESIS, Minimal, Multifocal.         |
| THYROIDS . . . . .     | No gross observations on tissue | ECTOPIC THYMUS, Present, Unilateral..                    |

The following tissues have no gross observations and were not examined microscopically:  
No tissue to list.

The following tissues have no gross observations and were marked as unremarkable microscopically:

|                  |                 |                  |              |                  |
|------------------|-----------------|------------------|--------------|------------------|
| AORTA            | BONE MARROW     | BRAIN            | CECUM        | COLON            |
| DIAPHRAGM        | DUODENUM        | EPIDIDYMIDES     | ESOPHAGUS    | EYES             |
| FEMUR            | HEART           | ILEUM            | JEJUNUM      | MESENTERIC L.N.  |
| SKELETAL MUSCLE  | SCIATIC NERVE   | PANCREAS         | PITUITARY    | SPINAL CORD CERV |
| SPINAL CORD THOR | MANDIBULAR S.G. | PAROTIDS         | STIFLE JOINT | SKIN             |
| STOMACH          | STERNUM         | SEMINAL VESICLES | TESTES       | THYMUS           |
| TONGUE           | TRACHEA         | URINARY BLADDER  |              |                  |

CONFIDENTIAL

Appendix 10  
Individual Animal Microscopic vs. Gross Observations

Fexinidazole

Study Number: 0504-2007

ANIMAL: 2745                      SEX: Male                      GROUP: 1                      DOSE LEVEL: vehicle  
DAY OF DEATH: 43 Test period                      STATUS: Final phase sacrifice                      TERMINAL BODY WEIGHT (g) : 405.3

| Tissue                 | Gross observations/comments     | Correlated Microscopic Observations                                                                                                                                                                           |
|------------------------|---------------------------------|---------------------------------------------------------------------------------------------------------------------------------------------------------------------------------------------------------------|
| GENER. CONDITION . . . | GOOD                            | No micropathology observations on tissue.                                                                                                                                                                     |
| HARDERIAN GLANDS . . . | No gross observations on tissue | PORPHYRIN DEPOSITS, Minimal, Multifocal.<br>HEMORRHAGE, UNILATERAL, Slight, Multifocal.<br>ADENITIS, UNILATERAL, Minimal, Multifocal, Chronic.<br>LYMPHOCYTIC INFILTRATION, Minimal, Multifocal, Unilateral.. |
| LIVER . . . . .        | No gross observations on tissue | CHRONIC INFLAMMATION, Minimal, Multifocal.<br>HEPATOCELLULAR VACUOLATION, PERIportal, Minimal.                                                                                                                |

The following tissues have no gross observations and were not examined microscopically:

|                 |                  |                  |                  |                 |
|-----------------|------------------|------------------|------------------|-----------------|
| ADRENALS        | AORTA            | BONE MARROW      | BRAIN            | CECUM           |
| COLON           | DIAPHRAGM        | DUODENUM         | EPIDIDYMIDES     | ESOPHAGUS       |
| EYES            | FEMUR            | HEART            | ILEUM            | JEJUNUM         |
| KIDNEYS         | MANDIBULAR L.N.  | MESENTERIC L.N.  | LUNG             | MAMMARY GLAND   |
| SKELETAL MUSCLE | SCIATIC NERVE    | OPTIC NERVES     | PANCREAS         | PITUITARY       |
| PROSTATE        | PARATHYROIDS     | SPINAL CORD CERV | SPINAL CORD THOR | MANDIBULAR S.G. |
| PAROTIDS        | STIFLE JOINT     | SKIN             | SPLEEN           | STOMACH         |
| STERNUM         | SEMINAL VESICLES | TESTES           | THYROIDS         | THYMUS          |
| TONGUE          | TRACHEA          | URINARY BLADDER  |                  |                 |

The following tissues have no gross observations and were marked as unremarkable microscopically:  
No tissue to list.

CONFIDENTIAL

Appendix 10  
Individual Animal Microscopic vs. Gross Observations

Fexinidazole

Study Number: 0504-2007

ANIMAL: 2746                      SEX: Male                      GROUP: 1                      DOSE LEVEL: vehicle  
DAY OF DEATH: 43 Test period                      STATUS: Final phase sacrifice                      TERMINAL BODY WEIGHT (g) : 370.8

Tissue                      Gross observations/comments                      Correlated Microscopic Observations

GENER. CONDITION . . .                      GOOD                      No micropathology observations on tissue.

HARDERIAN GLANDS . . . No gross observations on tissue                      PORPHYRIN DEPOSITS, Moderate, Multifocal.  
HEMORRHAGE, UNILATERAL, Slight, Multifocal.  
ADENITIS, UNILATERAL, Slight, Multifocal.  
LYMPHOCYTIC INFILTRATION, Minimal, Focal, Unilateral..

LIVER . . . . . No gross observations on tissue                      CHRONIC INFLAMMATION, Minimal, Multifocal.  
HEPATOCELLULAR VACUOLATION, PERIPORTAL, Minimal.

The following tissues have no gross observations and were not examined microscopically:

|                 |                  |                  |                  |                 |
|-----------------|------------------|------------------|------------------|-----------------|
| ADRENALS        | AORTA            | BONE MARROW      | BRAIN            | CECUM           |
| COLON           | DIAPHRAGM        | DUODENUM         | EPIDIDYIMIDES    | ESOPHAGUS       |
| EYES            | FEMUR            | HEART            | ILEUM            | JEJUNUM         |
| KIDNEYS         | MANDIBULAR L.N.  | MESENTERIC L.N.  | LUNG             | MAMMARY GLAND   |
| SKELETAL MUSCLE | SCIATIC NERVE    | OPTIC NERVES     | PANCREAS         | PITUITARY       |
| PROSTATE        | PARATHYROIDS     | SPINAL CORD CERV | SPINAL CORD THOR | MANDIBULAR S.G. |
| PAROTIDS        | STIFLE JOINT     | SKIN             | SPLEEN           | STOMACH         |
| STERNUM         | SEMINAL VESICLES | TESTES           | THYROIDS         | THYMUS          |
| TONGUE          | TRACHEA          | URINARY BLADDER  |                  |                 |

The following tissues have no gross observations and were marked as unremarkable microscopically:  
No tissue to list.

CONFIDENTIAL

Appendix 10  
Individual Animal Microscopic vs. Gross Observations

Fexinidazole

Study Number: 0504-2007

ANIMAL: 2747                      SEX: Male                      GROUP: 1                      DOSE LEVEL: vehicle  
DAY OF DEATH: 43 Test period                      STATUS: Final phase sacrifice                      TERMINAL BODY WEIGHT (g) : 436.6

| Tissue                 | Gross observations/comments     | Correlated Microscopic Observations                                                |
|------------------------|---------------------------------|------------------------------------------------------------------------------------|
| GENER. CONDITION . . . | GOOD                            | No micropathology observations on tissue.                                          |
| HARDERIAN GLANDS . . . | No gross observations on tissue | PORPHYRIN DEPOSITS, Minimal, Multifocal.<br>HEMORRHAGE, UNILATERAL, Slight, Focal. |
| LIVER . . . . .        | No gross observations on tissue | CHRONIC INFLAMMATION, Minimal, Multifocal.                                         |

The following tissues have no gross observations and were not examined microscopically:

|                 |                  |                  |                  |                 |
|-----------------|------------------|------------------|------------------|-----------------|
| ADRENALS        | AORTA            | BONE MARROW      | BRAIN            | CECUM           |
| COLON           | DIAPHRAGM        | DUODENUM         | EPIDIDYMIDES     | ESOPHAGUS       |
| EYES            | FEMUR            | HEART            | ILEUM            | JEJUNUM         |
| KIDNEYS         | MANDIBULAR L.N.  | MESENTERIC L.N.  | LUNG             | MAMMARY GLAND   |
| SKELETAL MUSCLE | SCIATIC NERVE    | OPTIC NERVES     | PANCREAS         | PITUITARY       |
| PROSTATE        | PARATHYROIDS     | SPINAL CORD CERV | SPINAL CORD THOR | MANDIBULAR S.G. |
| PAROTIDS        | STIFLE JOINT     | SKIN             | SPLEEN           | STOMACH         |
| STERNUM         | SEMINAL VESICLES | TESTES           | THYROIDS         | THYMUS          |
| TONGUE          | TRACHEA          | URINARY BLADDER  |                  |                 |

The following tissues have no gross observations and were marked as unremarkable microscopically:  
No tissue to list.

CONFIDENTIAL

Appendix 10  
Individual Animal Microscopic vs. Gross Observations

Fexinidazole

Study Number: 0504-2007

ANIMAL: 2748                      SEX: Male                      GROUP: 1                      DOSE LEVEL: vehicle  
DAY OF DEATH: 43 Test period                      STATUS: Final phase sacrifice                      TERMINAL BODY WEIGHT (g) : 458.6

Tissue                      Gross observations/comments                      Correlated Microscopic Observations

GENER. CONDITION . . .                      GOOD                      No micropathology observations on tissue.

HARDERIAN GLANDS . . . No gross observations on tissue                      PORPHYRIN DEPOSITS, Minimal, Multifocal.  
HEMORRHAGE, UNILATERAL, Moderate, Multifocal.

LIVER . . . . . No gross observations on tissue                      CHRONIC INFLAMMATION, Minimal, Multifocal.

The following tissues have no gross observations and were not examined microscopically:

|                 |                  |                  |                  |                 |
|-----------------|------------------|------------------|------------------|-----------------|
| ADRENALS        | AORTA            | BONE MARROW      | BRAIN            | CECUM           |
| COLON           | DIAPHRAGM        | DUODENUM         | EPIDIDYMIDES     | ESOPHAGUS       |
| EYES            | FEMUR            | HEART            | ILEUM            | JEJUNUM         |
| KIDNEYS         | MANDIBULAR L.N.  | MESENTERIC L.N.  | LUNG             | MAMMARY GLAND   |
| SKELETAL MUSCLE | SCIATIC NERVE    | OPTIC NERVES     | PANCREAS         | PITUITARY       |
| PROSTATE        | PARATHYROIDS     | SPINAL CORD CERV | SPINAL CORD THOR | MANDIBULAR S.G. |
| PAROTIDS        | STIFLE JOINT     | SKIN             | SPLEEN           | STOMACH         |
| STERNUM         | SEMINAL VESICLES | TESTES           | THYROIDS         | THYMUS          |
| TONGUE          | TRACHEA          | URINARY BLADDER  |                  |                 |

The following tissues have no gross observations and were marked as unremarkable microscopically:  
No tissue to list.

CONFIDENTIAL

Appendix 10  
Individual Animal Microscopic vs. Gross Observations

Fexinidazole

Study Number: 0504-2007

ANIMAL: 2749                      SEX: Male                      GROUP: 1                      DOSE LEVEL: vehicle  
DAY OF DEATH: 43 Test period                      STATUS: Final phase sacrifice                      TERMINAL BODY WEIGHT (g) : 363.6

Tissue                      Gross observations/comments                      Correlated Microscopic Observations

GENER. CONDITION . . .                      GOOD                      No micropathology observations on tissue.

HARDERIAN GLANDS . . . No gross observations on tissue                      PORPHYRIN DEPOSITS, Minimal, Multifocal, Unilateral..  
HEMORRHAGE, UNILATERAL, Slight, Multifocal.  
ADENITIS, UNILATERAL, Slight, Multifocal, Chronic.

LIVER . . . . . No gross observations on tissue                      CHRONIC INFLAMMATION, Minimal, Multifocal.  
HEPATOCELLULAR VACUOLATION, DIFFUSE, Minimal.

The following tissues have no gross observations and were not examined microscopically:

- |                 |                  |                  |                  |                 |
|-----------------|------------------|------------------|------------------|-----------------|
| ADRENALS        | AORTA            | BONE MARROW      | BRAIN            | CECUM           |
| COLON           | DIAPHRAGM        | DUODENUM         | EPIDIDYIMIDES    | ESOPHAGUS       |
| EYES            | FEMUR            | HEART            | ILEUM            | JEJUNUM         |
| KIDNEYS         | MANDIBULAR L.N.  | MESENTERIC L.N.  | LUNG             | MAMMARY GLAND   |
| SKELETAL MUSCLE | SCIATIC NERVE    | OPTIC NERVES     | PANCREAS         | PITUITARY       |
| PROSTATE        | PARATHYROIDS     | SPINAL CORD CERV | SPINAL CORD THOR | MANDIBULAR S.G. |
| PAROTIDS        | STIFLE JOINT     | SKIN             | SPLEEN           | STOMACH         |
| STERNUM         | SEMINAL VESICLES | TESTES           | THYROIDS         | THYMUS          |
| TONGUE          | TRACHEA          | URINARY BLADDER  |                  |                 |

The following tissues have no gross observations and were marked as unremarkable microscopically:  
No tissue to list.





CONFIDENTIAL

Appendix 10  
Individual Animal Microscopic vs. Gross Observations

Fexinidazole

Study Number: 0504-2007

|                              |                                       |                            |                      |
|------------------------------|---------------------------------------|----------------------------|----------------------|
| ANIMAL: 2751                 | SEX: Male                             | GROUP: 2                   | DOSE LEVEL: 50 mg/kg |
| DAY OF DEATH: 30 Test period | STATUS: Scheduled phase sacrifice # 1 | TERMINAL BODY WEIGHT (g) : | 374.7                |

| Tissue                 | Gross observations/comments     | Correlated Microscopic Observations                                                                                                                                                         |
|------------------------|---------------------------------|---------------------------------------------------------------------------------------------------------------------------------------------------------------------------------------------|
| GENER. CONDITION . . . | GOOD                            | No micropathology observations on tissue.                                                                                                                                                   |
| HARDERIAN GLANDS . . . | No gross observations on tissue | PORPHYRIN DEPOSITS, Minimal, Multifocal.                                                                                                                                                    |
| LIVER . . . . .        | No gross observations on tissue | CHRONIC INFLAMMATION, Minimal, Multifocal.<br><br>HEPATOCELLULAR HYPERTROPHY, CENTRIOLOBULAR, Minimal.<br><br>FOCAL NECROSIS, SUBCAPSULAR, Minimal. / with associated chronic inflammation. |

The following tissues have no gross observations and were not examined microscopically:

- |                 |                  |                  |                  |                 |
|-----------------|------------------|------------------|------------------|-----------------|
| ADRENALS        | AORTA            | BONE MARROW      | BRAIN            | CECUM           |
| COLON           | DIAPHRAGM        | DUODENUM         | EPIDIDYIMIDES    | ESOPHAGUS       |
| EYES            | FEMUR            | HEART            | ILEUM            | JEJUNUM         |
| KIDNEYS         | MANDIBULAR L.N.  | MESENTERIC L.N.  | LUNG             | MAMMARY GLAND   |
| SKELETAL MUSCLE | SCIATIC NERVE    | OPTIC NERVES     | PANCREAS         | PITUITARY       |
| PROSTATE        | PARATHYROIDS     | SPINAL CORD CERV | SPINAL CORD THOR | MANDIBULAR S.G. |
| PAROTIDS        | STIFLE JOINT     | SKIN             | SPLEEN           | STOMACH         |
| STERNUM         | SEMINAL VESICLES | TESTES           | THYROIDS         | THYMUS          |
| TONGUE          | TRACHEA          | URINARY BLADDER  |                  |                 |

The following tissues have no gross observations and were marked as unremarkable microscopically:  
No tissue to list.

CONFIDENTIAL

Appendix 10  
Individual Animal Microscopic vs. Gross Observations

Fexinidazole

Study Number: 0504-2007

ANIMAL: 2752                      SEX: Male                      GROUP: 2                      DOSE LEVEL: 50 mg/kg  
DAY OF DEATH: 30 Test period                      STATUS: Scheduled phase sacrifice # 1                      TERMINAL BODY WEIGHT (g) : 401.4

| Tissue                 | Gross observations/comments     | Correlated Microscopic Observations                                                                                                                                 |
|------------------------|---------------------------------|---------------------------------------------------------------------------------------------------------------------------------------------------------------------|
| GENER. CONDITION . . . | GOOD                            | No micropathology observations on tissue.                                                                                                                           |
| HARDERIAN GLANDS . . . | No gross observations on tissue | PORPHYRIN DEPOSITS, Minimal, Multifocal.                                                                                                                            |
| LIVER . . . . .        | No gross observations on tissue | CHRONIC INFLAMMATION, Minimal, Multifocal.<br><br>HEPATOCELLULAR HYPERTROPHY, CENTRIOLOBULAR,<br>Slight.<br><br>HEPATOCELLULAR VACUOLATION, PERIPORTAL,<br>Minimal. |

The following tissues have no gross observations and were not examined microscopically:

- |                 |                  |                  |                  |                 |
|-----------------|------------------|------------------|------------------|-----------------|
| ADRENALS        | AORTA            | BONE MARROW      | BRAIN            | CECUM           |
| COLON           | DIAPHRAGM        | DUODENUM         | EPIDIDYMIDES     | ESOPHAGUS       |
| EYES            | FEMUR            | HEART            | ILEUM            | JEJUNUM         |
| KIDNEYS         | MANDIBULAR L.N.  | MESENTERIC L.N.  | LUNG             | MAMMARY GLAND   |
| SKELETAL MUSCLE | SCIATIC NERVE    | OPTIC NERVES     | PANCREAS         | PITUITARY       |
| PROSTATE        | PARATHYROIDS     | SPINAL CORD CERV | SPINAL CORD THOR | MANDIBULAR S.G. |
| PAROTIDS        | STIFLE JOINT     | SKIN             | SPLEEN           | STOMACH         |
| STERNUM         | SEMINAL VESICLES | TESTES           | THYROIDS         | THYMUS          |
| TONGUE          | TRACHEA          | URINARY BLADDER  |                  |                 |

The following tissues have no gross observations and were marked as unremarkable microscopically:  
No tissue to list.

CONFIDENTIAL

Appendix 10  
Individual Animal Microscopic vs. Gross Observations

Fexinidazole

Study Number: 0504-2007

|                              |                                       |                            |                      |
|------------------------------|---------------------------------------|----------------------------|----------------------|
| ANIMAL: 2753                 | SEX: Male                             | GROUP: 2                   | DOSE LEVEL: 50 mg/kg |
| DAY OF DEATH: 30 Test period | STATUS: Scheduled phase sacrifice # 1 | TERMINAL BODY WEIGHT (g) : | 364.6                |

| Tissue                 | Gross observations/comments     | Correlated Microscopic Observations                                                               |
|------------------------|---------------------------------|---------------------------------------------------------------------------------------------------|
| GENER. CONDITION . . . | GOOD                            | No micropathology observations on tissue.                                                         |
| HARDERIAN GLANDS . . . | No gross observations on tissue | PORPHYRIN DEPOSITS, Minimal, Multifocal.                                                          |
| LIVER . . . . .        | No gross observations on tissue | CHRONIC INFLAMMATION, Slight, Multifocal.<br>HEPATOCELLULAR HYPERTROPHY, CENTRIOLOBULAR, Minimal. |

The following tissues have no gross observations and were not examined microscopically:

- |                 |                  |                  |                  |                 |
|-----------------|------------------|------------------|------------------|-----------------|
| ADRENALS        | AORTA            | BONE MARROW      | BRAIN            | CECUM           |
| COLON           | DIAPHRAGM        | DUODENUM         | EPIDIDYMIDES     | ESOPHAGUS       |
| EYES            | FEMUR            | HEART            | ILEUM            | JEJUNUM         |
| KIDNEYS         | MANDIBULAR L.N.  | MESENTERIC L.N.  | LUNG             | MAMMARY GLAND   |
| SKELETAL MUSCLE | SCIATIC NERVE    | OPTIC NERVES     | PANCREAS         | PITUITARY       |
| PROSTATE        | PARATHYROIDS     | SPINAL CORD CERV | SPINAL CORD THOR | MANDIBULAR S.G. |
| PAROTIDS        | STIFLE JOINT     | SKIN             | SPLEEN           | STOMACH         |
| STERNUM         | SEMINAL VESICLES | TESTES           | THYROIDS         | THYMUS          |
| TONGUE          | TRACHEA          | URINARY BLADDER  |                  |                 |

The following tissues have no gross observations and were marked as unremarkable microscopically:  
No tissue to list.

CONFIDENTIAL

Appendix 10  
 Individual Animal Microscopic vs. Gross Observations

Fexinidazole

Study Number: 0504-2007

ANIMAL: 2754                      SEX: Male                      GROUP: 2                      DOSE LEVEL: 50 mg/kg  
 DAY OF DEATH: 30 Test period                      STATUS: Scheduled phase sacrifice # 1                      TERMINAL BODY WEIGHT (g) : 358.5

| Tissue                 | Gross observations/comments     | Correlated Microscopic Observations                                                                  |
|------------------------|---------------------------------|------------------------------------------------------------------------------------------------------|
| GENER. CONDITION . . . | GOOD                            | No micropathology observations on tissue.                                                            |
| HARDERIAN GLANDS . . . | No gross observations on tissue | PORPHYRIN DEPOSITS, Minimal, Multifocal.                                                             |
| LIVER . . . . .        | No gross observations on tissue | CHRONIC INFLAMMATION, Slight, Multifocal.<br><br>HEPATOCELLULAR HYPERTROPHY, CENTRILOBULAR, Minimal. |

The following tissues have no gross observations and were not examined microscopically:

- |                 |                  |                  |                  |                 |
|-----------------|------------------|------------------|------------------|-----------------|
| ADRENALS        | AORTA            | BONE MARROW      | BRAIN            | CECUM           |
| COLON           | DIAPHRAGM        | DUODENUM         | EPIDIDYMIDES     | ESOPHAGUS       |
| EYES            | FEMUR            | HEART            | ILEUM            | JEJUNUM         |
| KIDNEYS         | MANDIBULAR L.N.  | MESENTERIC L.N.  | LUNG             | MAMMARY GLAND   |
| SKELETAL MUSCLE | SCIATIC NERVE    | OPTIC NERVES     | PANCREAS         | PITUITARY       |
| PROSTATE        | PARATHYROIDS     | SPINAL CORD CERV | SPINAL CORD THOR | MANDIBULAR S.G. |
| PAROTIDS        | STIFLE JOINT     | SKIN             | SPLEEN           | STOMACH         |
| STERNUM         | SEMINAL VESICLES | TESTES           | THYROIDS         | THYMUS          |
| TONGUE          | TRACHEA          | URINARY BLADDER  |                  |                 |

The following tissues have no gross observations and were marked as unremarkable microscopically:  
 No tissue to list.

CONFIDENTIAL

Appendix 10  
Individual Animal Microscopic vs. Gross Observations

Fexinidazole

Study Number: 0504-2007

ANIMAL: 2755                      SEX: Male                      GROUP: 2                      DOSE LEVEL: 50 mg/kg  
DAY OF DEATH: 29 Test period                      STATUS: Scheduled phase sacrifice # 1                      TERMINAL BODY WEIGHT (g) : 438.5

| Tissue                 | Gross observations/comments     | Correlated Microscopic Observations                                                                                                                            |
|------------------------|---------------------------------|----------------------------------------------------------------------------------------------------------------------------------------------------------------|
| GENER. CONDITION . . . | GOOD                            | No micropathology observations on tissue.                                                                                                                      |
| HARDERIAN GLANDS . . . | No gross observations on tissue | PORPHYRIN DEPOSITS, Slight, Multifocal.                                                                                                                        |
| LIVER . . . . .        | No gross observations on tissue | CHRONIC INFLAMMATION, Minimal, Multifocal.<br><br>HEPATOCELLULAR HYPERTROPHY, CENTRIOLOBULAR, Minimal.<br><br>HEPATOCELLULAR VACUOLATION, PERIPORTAL, Minimal. |

The following tissues have no gross observations and were not examined microscopically:

- |                 |                  |                  |                  |                 |
|-----------------|------------------|------------------|------------------|-----------------|
| ADRENALS        | AORTA            | BONE MARROW      | BRAIN            | CECUM           |
| COLON           | DIAPHRAGM        | DUODENUM         | EPIDIDYMIDES     | ESOPHAGUS       |
| EYES            | FEMUR            | HEART            | ILEUM            | JEJUNUM         |
| KIDNEYS         | MANDIBULAR L.N.  | MESENTERIC L.N.  | LUNG             | MAMMARY GLAND   |
| SKELETAL MUSCLE | SCIATIC NERVE    | OPTIC NERVES     | PANCREAS         | PITUITARY       |
| PROSTATE        | PARATHYROIDS     | SPINAL CORD CERV | SPINAL CORD THOR | MANDIBULAR S.G. |
| PAROTIDS        | STIFLE JOINT     | SKIN             | SPLEEN           | STOMACH         |
| STERNUM         | SEMINAL VESICLES | TESTES           | THYROIDS         | THYMUS          |
| TONGUE          | TRACHEA          | URINARY BLADDER  |                  |                 |

The following tissues have no gross observations and were marked as unremarkable microscopically:  
No tissue to list.

CONFIDENTIAL

Appendix 10  
Individual Animal Microscopic vs. Gross Observations

Fexinidazole

Study Number: 0504-2007

ANIMAL: 2756                      SEX: Male                      GROUP: 2                      DOSE LEVEL: 50 mg/kg  
DAY OF DEATH: 29 Test period                      STATUS: Scheduled phase sacrifice # 1                      TERMINAL BODY WEIGHT (g) : 343.4

| Tissue                 | Gross observations/comments     | Correlated Microscopic Observations                                                                                                               |
|------------------------|---------------------------------|---------------------------------------------------------------------------------------------------------------------------------------------------|
| GENER. CONDITION . . . | GOOD                            | No micropathology observations on tissue.                                                                                                         |
| HARDERIAN GLANDS . . . | No gross observations on tissue | PORPHYRIN DEPOSITS, Moderate, Multifocal.<br>HEMORRHAGE, UNILATERAL, Slight, Multifocal.                                                          |
| LIVER . . . . .        | No gross observations on tissue | CHRONIC INFLAMMATION, Minimal, Multifocal.<br>HEPATOCELLULAR HYPERTROPHY, CENTRILOBULAR, Slight.<br>HEPATOCELLULAR VACUOLATION, DIFFUSE, Minimal. |

The following tissues have no gross observations and were not examined microscopically:

|                 |                  |                  |                  |                 |
|-----------------|------------------|------------------|------------------|-----------------|
| ADRENALS        | AORTA            | BONE MARROW      | BRAIN            | CECUM           |
| COLON           | DIAPHRAGM        | DUODENUM         | EPIDIDYMIDES     | ESOPHAGUS       |
| EYES            | FEMUR            | HEART            | ILEUM            | JEJUNUM         |
| KIDNEYS         | MANDIBULAR L.N.  | MESENTERIC L.N.  | LUNG             | MAMMARY GLAND   |
| SKELETAL MUSCLE | SCIATIC NERVE    | OPTIC NERVES     | PANCREAS         | PITUITARY       |
| PROSTATE        | PARATHYROIDS     | SPINAL CORD CERV | SPINAL CORD THOR | MANDIBULAR S.G. |
| PAROTIDS        | STIFLE JOINT     | SKIN             | SPLEEN           | STOMACH         |
| STERNUM         | SEMINAL VESICLES | TESTES           | THYROIDS         | THYMUS          |
| TONGUE          | TRACHEA          | URINARY BLADDER  |                  |                 |

The following tissues have no gross observations and were marked as unremarkable microscopically:  
No tissue to list.

CONFIDENTIAL

Appendix 10  
Individual Animal Microscopic vs. Gross Observations

Fexinidazole

Study Number: 0504-2007

ANIMAL: 2757                      SEX: Male                      GROUP: 2                      DOSE LEVEL: 50 mg/kg  
DAY OF DEATH: 29 Test period                      STATUS: Scheduled phase sacrifice # 1                      TERMINAL BODY WEIGHT (g) : 340.1

| Tissue                 | Gross observations/comments     | Correlated Microscopic Observations                                                                   |
|------------------------|---------------------------------|-------------------------------------------------------------------------------------------------------|
| GENER. CONDITION . . . | GOOD                            | No micropathology observations on tissue.                                                             |
| HARDERIAN GLANDS . . . | No gross observations on tissue | PORPHYRIN DEPOSITS, Slight, Multifocal.                                                               |
| LIVER . . . . .        | No gross observations on tissue | CHRONIC INFLAMMATION, Minimal, Multifocal.<br><br>HEPATOCELLULAR HYPERTROPHY, CENTRILOBULAR, Minimal. |

The following tissues have no gross observations and were not examined microscopically:

|                 |                  |                  |                  |                 |
|-----------------|------------------|------------------|------------------|-----------------|
| ADRENALS        | AORTA            | BONE MARROW      | BRAIN            | CECUM           |
| COLON           | DIAPHRAGM        | DUODENUM         | EPIDIDYMIDES     | ESOPHAGUS       |
| EYES            | FEMUR            | HEART            | ILEUM            | JEJUNUM         |
| KIDNEYS         | MANDIBULAR L.N.  | MESENTERIC L.N.  | LUNG             | MAMMARY GLAND   |
| SKELETAL MUSCLE | SCIATIC NERVE    | OPTIC NERVES     | PANCREAS         | PITUITARY       |
| PROSTATE        | PARATHYROIDS     | SPINAL CORD CERV | SPINAL CORD THOR | MANDIBULAR S.G. |
| PAROTIDS        | STIFLE JOINT     | SKIN             | SPLEEN           | STOMACH         |
| STERNUM         | SEMINAL VESICLES | TESTES           | THYROIDS         | THYMUS          |
| TONGUE          | TRACHEA          | URINARY BLADDER  |                  |                 |

The following tissues have no gross observations and were marked as unremarkable microscopically:  
No tissue to list.

CONFIDENTIAL

Appendix 10  
Individual Animal Microscopic vs. Gross Observations

Fexinidazole

Study Number: 0504-2007

ANIMAL: 2758                      SEX: Male                      GROUP: 2                      DOSE LEVEL: 50 mg/kg  
DAY OF DEATH: 29 Test period                      STATUS: Scheduled phase sacrifice # 1                      TERMINAL BODY WEIGHT (g) : 336.5

| Tissue                 | Gross observations/comments     | Correlated Microscopic Observations                                                                                                                        |
|------------------------|---------------------------------|------------------------------------------------------------------------------------------------------------------------------------------------------------|
| GENER. CONDITION . . . | GOOD                            | No micropathology observations on tissue.                                                                                                                  |
| HARDERIAN GLANDS . . . | No gross observations on tissue | PORPHYRIN DEPOSITS, Slight, Multifocal.<br><br>ADENITIS, UNILATERAL, Slight, Multifocal, Acute.                                                            |
| LIVER . . . . .        | No gross observations on tissue | CHRONIC INFLAMMATION, Minimal, Multifocal.<br><br>HEPATOCELLULAR HYPERTROPHY, CENTRIOLOBULAR, Slight.<br><br>HEPATOCELLULAR VACUOLATION, DIFFUSE, Minimal. |

The following tissues have no gross observations and were not examined microscopically:

- |                 |                  |                  |                  |                 |
|-----------------|------------------|------------------|------------------|-----------------|
| ADRENALS        | AORTA            | BONE MARROW      | BRAIN            | CECUM           |
| COLON           | DIAPHRAGM        | DUODENUM         | EPIDIDYIMIDES    | ESOPHAGUS       |
| EYES            | FEMUR            | HEART            | ILEUM            | JEJUNUM         |
| KIDNEYS         | MANDIBULAR L.N.  | MESENTERIC L.N.  | LUNG             | MAMMARY GLAND   |
| SKELETAL MUSCLE | SCIATIC NERVE    | OPTIC NERVES     | PANCREAS         | PITUITARY       |
| PROSTATE        | PARATHYROIDS     | SPINAL CORD CERV | SPINAL CORD THOR | MANDIBULAR S.G. |
| PAROTIDS        | STIFLE JOINT     | SKIN             | SPLEEN           | STOMACH         |
| STERNUM         | SEMINAL VESICLES | TESTES           | THYROIDS         | THYMUS          |
| TONGUE          | TRACHEA          | URINARY BLADDER  |                  |                 |

The following tissues have no gross observations and were marked as unremarkable microscopically:  
No tissue to list.



CONFIDENTIAL

Appendix 10  
Individual Animal Microscopic vs. Gross Observations

Fexinidazole

Study Number: 0504-2007

ANIMAL: 2759                      SEX: Male                      GROUP: 2                      DOSE LEVEL: 50 mg/kg  
DAY OF DEATH: 29 Test period                      STATUS: Scheduled phase sacrifice # 1                      TERMINAL BODY WEIGHT (g) : 353.6

Tissue                      Gross observations/comments                      Correlated Microscopic Observations

GENER. CONDITION . . .                      GOOD                      No micropathology observations on tissue.

HARDERIAN GLANDS . . . No gross observations on tissue                      PORPHYRIN DEPOSITS, Slight, Multifocal.  
ADENITIS, UNILATERAL, Minimal, Multifocal,  
Acute.

LIVER . . . . . No gross observations on tissue                      CHRONIC INFLAMMATION, Minimal, Multifocal.  
HEPATOCELLULAR HYPERTROPHY, CENTRIOLOBULAR,  
Minimal.  
HEPATOCELLULAR VACUOLATION, PERIportal,  
Minimal.

The following tissues have no gross observations and were not examined microscopically:

- |                 |                  |                  |                  |                 |
|-----------------|------------------|------------------|------------------|-----------------|
| ADRENALS        | AORTA            | BONE MARROW      | BRAIN            | CECUM           |
| COLON           | DIAPHRAGM        | DUODENUM         | EPIDIDYIMIDES    | ESOPHAGUS       |
| EYES            | FEMUR            | HEART            | ILEUM            | JEJUNUM         |
| KIDNEYS         | MANDIBULAR L.N.  | MESENTERIC L.N.  | LUNG             | MAMMARY GLAND   |
| SKELETAL MUSCLE | SCIATIC NERVE    | OPTIC NERVES     | PANCREAS         | PITUITARY       |
| PROSTATE        | PARATHYROIDS     | SPINAL CORD CERV | SPINAL CORD THOR | MANDIBULAR S.G. |
| PAROTIDS        | STIFLE JOINT     | SKIN             | SPLEEN           | STOMACH         |
| STERNUM         | SEMINAL VESICLES | TESTES           | THYROIDS         | THYMUS          |
| TONGUE          | TRACHEA          | URINARY BLADDER  |                  |                 |

The following tissues have no gross observations and were marked as unremarkable microscopically:  
No tissue to list.

CONFIDENTIAL

Appendix 10  
Individual Animal Microscopic vs. Gross Observations

Fexinidazole

Study Number: 0504-2007

ANIMAL: 2760                      SEX: Male                      GROUP: 3                      DOSE LEVEL: 200 mg/kg  
DAY OF DEATH: 30 Test period                      STATUS: Scheduled phase sacrifice # 1                      TERMINAL BODY WEIGHT (g) : 359.3

| Tissue                 | Gross observations/comments     | Correlated Microscopic Observations                                                                  |
|------------------------|---------------------------------|------------------------------------------------------------------------------------------------------|
| GENER. CONDITION . . . | GOOD                            | No micropathology observations on tissue.                                                            |
| HARDERIAN GLANDS . . . | No gross observations on tissue | PORPHYRIN DEPOSITS, Minimal, Multifocal.                                                             |
| LIVER . . . . .        | No gross observations on tissue | CHRONIC INFLAMMATION, Slight, Multifocal.<br><br>HEPATOCELLULAR HYPERTROPHY, CENTRILOBULAR, Minimal. |

The following tissues have no gross observations and were not examined microscopically:

|                 |                  |                  |                  |                 |
|-----------------|------------------|------------------|------------------|-----------------|
| ADRENALS        | AORTA            | BONE MARROW      | BRAIN            | CECUM           |
| COLON           | DIAPHRAGM        | DUODENUM         | EPIDIDYMIDES     | ESOPHAGUS       |
| EYES            | FEMUR            | HEART            | ILEUM            | JEJUNUM         |
| KIDNEYS         | MANDIBULAR L.N.  | MESENTERIC L.N.  | LUNG             | MAMMARY GLAND   |
| SKELETAL MUSCLE | SCIATIC NERVE    | OPTIC NERVES     | PANCREAS         | PITUITARY       |
| PROSTATE        | PARATHYROIDS     | SPINAL CORD CERV | SPINAL CORD THOR | MANDIBULAR S.G. |
| PAROTIDS        | STIFLE JOINT     | SKIN             | SPLEEN           | STOMACH         |
| STERNUM         | SEMINAL VESICLES | TESTES           | THYROIDS         | THYMUS          |
| TONGUE          | TRACHEA          | URINARY BLADDER  |                  |                 |

The following tissues have no gross observations and were marked as unremarkable microscopically:  
No tissue to list.

CONFIDENTIAL

Appendix 10  
Individual Animal Microscopic vs. Gross Observations

Fexinidazole

Study Number: 0504-2007

ANIMAL: 2761                      SEX: Male                      GROUP: 3                      DOSE LEVEL: 200 mg/kg  
DAY OF DEATH: 30 Test period                      STATUS: Scheduled phase sacrifice # 1                      TERMINAL BODY WEIGHT (g) : 385.0

| Tissue                 | Gross observations/comments     | Correlated Microscopic Observations                                                                    |
|------------------------|---------------------------------|--------------------------------------------------------------------------------------------------------|
| GENER. CONDITION . . . | GOOD                            | No micropathology observations on tissue.                                                              |
| HARDERIAN GLANDS . . . | No gross observations on tissue | PORPHYRIN DEPOSITS, Slight, Multifocal.                                                                |
| LIVER . . . . .        | No gross observations on tissue | CHRONIC INFLAMMATION, Minimal, Multifocal.<br><br>HEPATOCELLULAR HYPERTROPHY, CENTRIOLOBULAR, Minimal. |

The following tissues have no gross observations and were not examined microscopically:

|                 |                  |                  |                  |                 |
|-----------------|------------------|------------------|------------------|-----------------|
| ADRENALS        | AORTA            | BONE MARROW      | BRAIN            | CECUM           |
| COLON           | DIAPHRAGM        | DUODENUM         | EPIDIDYMIDES     | ESOPHAGUS       |
| EYES            | FEMUR            | HEART            | ILEUM            | JEJUNUM         |
| KIDNEYS         | MANDIBULAR L.N.  | MESENTERIC L.N.  | LUNG             | MAMMARY GLAND   |
| SKELETAL MUSCLE | SCIATIC NERVE    | OPTIC NERVES     | PANCREAS         | PITUITARY       |
| PROSTATE        | PARATHYROIDS     | SPINAL CORD CERV | SPINAL CORD THOR | MANDIBULAR S.G. |
| PAROTIDS        | STIFLE JOINT     | SKIN             | SPLEEN           | STOMACH         |
| STERNUM         | SEMINAL VESICLES | TESTES           | THYROIDS         | THYMUS          |
| TONGUE          | TRACHEA          | URINARY BLADDER  |                  |                 |

The following tissues have no gross observations and were marked as unremarkable microscopically:  
No tissue to list.

CONFIDENTIAL

Appendix 10  
Individual Animal Microscopic vs. Gross Observations

Fexinidazole

Study Number: 0504-2007

ANIMAL: 2762                      SEX: Male                      GROUP: 3                      DOSE LEVEL: 200 mg/kg  
DAY OF DEATH: 30 Test period                      STATUS: Scheduled phase sacrifice # 1                      TERMINAL BODY WEIGHT (g) : 393.6

| Tissue                 | Gross observations/comments     | Correlated Microscopic Observations                                                                                                                            |
|------------------------|---------------------------------|----------------------------------------------------------------------------------------------------------------------------------------------------------------|
| GENER. CONDITION . . . | GOOD                            | No micropathology observations on tissue.                                                                                                                      |
| HARDERIAN GLANDS . . . | No gross observations on tissue | PORPHYRIN DEPOSITS, Slight, Multifocal.                                                                                                                        |
| LIVER . . . . .        | No gross observations on tissue | CHRONIC INFLAMMATION, Minimal, Multifocal.<br><br>HEPATOCELLULAR HYPERTROPHY, CENTRIOLOBULAR, Minimal.<br><br>HEPATOCELLULAR VACUOLATION, PERIPORTAL, Minimal. |

The following tissues have no gross observations and were not examined microscopically:

|                 |                  |                  |                  |                 |
|-----------------|------------------|------------------|------------------|-----------------|
| ADRENALS        | AORTA            | BONE MARROW      | BRAIN            | CECUM           |
| COLON           | DIAPHRAGM        | DUODENUM         | EPIDIDYMIDES     | ESOPHAGUS       |
| EYES            | FEMUR            | HEART            | ILEUM            | JEJUNUM         |
| KIDNEYS         | MANDIBULAR L.N.  | MESENTERIC L.N.  | LUNG             | MAMMARY GLAND   |
| SKELETAL MUSCLE | SCIATIC NERVE    | OPTIC NERVES     | PANCREAS         | PITUITARY       |
| PROSTATE        | PARATHYROIDS     | SPINAL CORD CERV | SPINAL CORD THOR | MANDIBULAR S.G. |
| PAROTIDS        | STIFLE JOINT     | SKIN             | SPLEEN           | STOMACH         |
| STERNUM         | SEMINAL VESICLES | TESTES           | THYROIDS         | THYMUS          |
| TONGUE          | TRACHEA          | URINARY BLADDER  |                  |                 |

The following tissues have no gross observations and were marked as unremarkable microscopically:  
No tissue to list.

CONFIDENTIAL

Appendix 10  
 Individual Animal Microscopic vs. Gross Observations

Fexinidazole

Study Number: 0504-2007

ANIMAL: 2763                                   SEX: Male                                   GROUP: 3                                   DOSE LEVEL: 200 mg/kg  
 DAY OF DEATH: 30 Test period                 STATUS: Scheduled phase sacrifice # 1                 TERMINAL BODY WEIGHT (g) : 330.5

| Tissue                 | Gross observations/comments                                       | Correlated Microscopic Observations                                                                                                                                                       |
|------------------------|-------------------------------------------------------------------|-------------------------------------------------------------------------------------------------------------------------------------------------------------------------------------------|
| GENER. CONDITION . . . | GOOD                                                              | No micropathology observations on tissue.                                                                                                                                                 |
| HARDERIAN GLANDS . . . | No gross observations on tissue                                   | PORPHYRIN DEPOSITS, Moderate, Multifocal.                                                                                                                                                 |
| LIVER . . . . .        | No gross observations on tissue                                   | CHRONIC INFLAMMATION, Minimal, Multifocal.<br><br>HEPATOCELLULAR HYPERTROPHY, CENTRIOLOBULAR, Slight.                                                                                     |
| SKIN . . . . .         | ENCRUSTED AREA(S), single/ in the head region, 10 mm in diameter. | Examined 1 correlation found:<br>SCAB FORMATION, Slight, Multifocal.<br><br>ACANTHOSIS, Slight, Multifocal.<br><br>EPIDERMAL/DERMAL INFLAMMATION, Slight, Multifocal. / acute to chronic. |

The following tissues have no gross observations and were not examined microscopically:

|                  |                 |                  |                  |                 |
|------------------|-----------------|------------------|------------------|-----------------|
| ADRENALS         | AORTA           | BONE MARROW      | BRAIN            | CECUM           |
| COLON            | DIAPHRAGM       | DUODENUM         | EPIDIDYMIDES     | ESOPHAGUS       |
| EYES             | FEMUR           | HEART            | ILEUM            | JEJUNUM         |
| KIDNEYS          | MANDIBULAR L.N. | MESENTERIC L.N.  | LUNG             | MAMMARY GLAND   |
| SKELETAL MUSCLE  | SCIATIC NERVE   | OPTIC NERVES     | PANCREAS         | PITUITARY       |
| PROSTATE         | PARATHYROIDS    | SPINAL CORD CERV | SPINAL CORD THOR | MANDIBULAR S.G. |
| PAROTIDS         | STIFLE JOINT    | SPLEEN           | STOMACH          | STERNUM         |
| SEMINAL VESICLES | TESTES          | THYROIDS         | THYMUS           | TONGUE          |
| TRACHEA          | URINARY BLADDER |                  |                  |                 |

The following tissues have no gross observations and were marked as unremarkable microscopically:  
 No tissue to list.

CONFIDENTIAL

Appendix 10  
Individual Animal Microscopic vs. Gross Observations

Fexinidazole

Study Number: 0504-2007

ANIMAL: 2764                      SEX: Male                      GROUP: 3                      DOSE LEVEL: 200 mg/kg  
DAY OF DEATH: 30 Test period                      STATUS: Scheduled phase sacrifice # 1                      TERMINAL BODY WEIGHT (g) : 396.5

| Tissue                 | Gross observations/comments                                       | Correlated Microscopic Observations                                                                                                                                                    |
|------------------------|-------------------------------------------------------------------|----------------------------------------------------------------------------------------------------------------------------------------------------------------------------------------|
| GENER. CONDITION . . . | GOOD                                                              | No micropathology observations on tissue.                                                                                                                                              |
| HARDERIAN GLANDS . . . | No gross observations on tissue                                   | PORPHYRIN DEPOSITS, Slight, Multifocal.                                                                                                                                                |
| LIVER . . . . .        | No gross observations on tissue                                   | CHRONIC INFLAMMATION, Minimal, Multifocal.<br><br>HEPATOCELLULAR HYPERTROPHY, CENTRIOLOBULAR, Slight.<br><br>HEPATOCELLULAR VACUOLATION, PERIPORTAL, Minimal.                          |
| SKIN . . . . .         | ENCRUSTED AREA(S), single/ in the head region, 10 mm in diameter. | Examined 1 correlation found:<br>SCAB FORMATION, Moderate, Focal.<br><br>ACANTHOSIS, Slight, Multifocal.<br><br>EPIDERMAL/DERMAL INFLAMMATION, Slight, Multifocal. / acute to chronic. |

The following tissues have no gross observations and were not examined microscopically:

- |                  |                 |                  |                  |                 |
|------------------|-----------------|------------------|------------------|-----------------|
| ADRENALS         | AORTA           | BONE MARROW      | BRAIN            | CECUM           |
| COLON            | DIAPHRAGM       | DUODENUM         | EPIDIDYMIDES     | ESOPHAGUS       |
| EYES             | FEMUR           | HEART            | ILEUM            | JEJUNUM         |
| KIDNEYS          | MANDIBULAR L.N. | MESENTERIC L.N.  | LUNG             | MAMMARY GLAND   |
| SKELETAL MUSCLE  | SCIATIC NERVE   | OPTIC NERVES     | PANCREAS         | PITUITARY       |
| PROSTATE         | PARATHYROIDS    | SPINAL CORD CERV | SPINAL CORD THOR | MANDIBULAR S.G. |
| PAROTIDS         | STIFLE JOINT    | SPLEEN           | STOMACH          | STERNUM         |
| SEMINAL VESICLES | TESTES          | THYROIDS         | THYMUS           | TONGUE          |
| TRACHEA          | URINARY BLADDER |                  |                  |                 |

CONFIDENTIAL

Appendix 10  
Individual Animal Microscopic vs. Gross Observations

Fexinidazole

Study Number: 0504-2007

---

|                              |                                       |                            |                       |
|------------------------------|---------------------------------------|----------------------------|-----------------------|
| ANIMAL: 2764                 | SEX: Male                             | GROUP: 3                   | DOSE LEVEL: 200 mg/kg |
| DAY OF DEATH: 30 Test period | STATUS: Scheduled phase sacrifice # 1 | TERMINAL BODY WEIGHT (g) : | 396.5                 |

---

| Tissue | Gross observations/comments | Correlated Microscopic Observations |
|--------|-----------------------------|-------------------------------------|
|--------|-----------------------------|-------------------------------------|

---

The following tissues have no gross observations and were marked as unremarkable microscopically:  
No tissue to list.

CONFIDENTIAL

Appendix 10  
Individual Animal Microscopic vs. Gross Observations

Fexinidazole

Study Number: 0504-2007

|                              |                                       |                            |                       |
|------------------------------|---------------------------------------|----------------------------|-----------------------|
| ANIMAL: 2765                 | SEX: Male                             | GROUP: 3                   | DOSE LEVEL: 200 mg/kg |
| DAY OF DEATH: 29 Test period | STATUS: Scheduled phase sacrifice # 1 | TERMINAL BODY WEIGHT (g) : | 362.8                 |

| Tissue                 | Gross observations/comments     | Correlated Microscopic Observations                                                                       |
|------------------------|---------------------------------|-----------------------------------------------------------------------------------------------------------|
| GENER. CONDITION . . . | GOOD                            | No micropathology observations on tissue.                                                                 |
| HARDERIAN GLANDS . . . | No gross observations on tissue | PORPHYRIN DEPOSITS, Slight, Multifocal.                                                                   |
| LIVER . . . . .        | No gross observations on tissue | CHRONIC INFLAMMATION, Minimal, Multifocal.<br><br>HEPATOCELLULAR HYPERTROPHY, CENTRIOLOBULAR,<br>Minimal. |

The following tissues have no gross observations and were not examined microscopically:

- |                 |                  |                  |                  |                 |
|-----------------|------------------|------------------|------------------|-----------------|
| ADRENALS        | AORTA            | BONE MARROW      | BRAIN            | CECUM           |
| COLON           | DIAPHRAGM        | DUODENUM         | EPIDIDYMIDES     | ESOPHAGUS       |
| EYES            | FEMUR            | HEART            | ILEUM            | JEJUNUM         |
| KIDNEYS         | MANDIBULAR L.N.  | MESENTERIC L.N.  | LUNG             | MAMMARY GLAND   |
| SKELETAL MUSCLE | SCIATIC NERVE    | OPTIC NERVES     | PANCREAS         | PITUITARY       |
| PROSTATE        | PARATHYROIDS     | SPINAL CORD CERV | SPINAL CORD THOR | MANDIBULAR S.G. |
| PAROTIDS        | STIFLE JOINT     | SKIN             | SPLEEN           | STOMACH         |
| STERNUM         | SEMINAL VESICLES | TESTES           | THYROIDS         | THYMUS          |
| TONGUE          | TRACHEA          | URINARY BLADDER  |                  |                 |

The following tissues have no gross observations and were marked as unremarkable microscopically:  
No tissue to list.



CONFIDENTIAL

Appendix 10  
Individual Animal Microscopic vs. Gross Observations

Fexinidazole

Study Number: 0504-2007

ANIMAL: 2766                      SEX: Male                      GROUP: 3                      DOSE LEVEL: 200 mg/kg  
DAY OF DEATH: 29 Test period                      STATUS: Scheduled phase sacrifice # 1                      TERMINAL BODY WEIGHT (g) : 340.6

| Tissue                 | Gross observations/comments     | Correlated Microscopic Observations                                                              |
|------------------------|---------------------------------|--------------------------------------------------------------------------------------------------|
| GENER. CONDITION . . . | GOOD                            | No micropathology observations on tissue.                                                        |
| HARDERIAN GLANDS . . . | No gross observations on tissue | PORPHYRIN DEPOSITS, Moderate, Multifocal.<br>HEMORRHAGE, UNILATERAL, Slight, Multifocal.         |
| LIVER . . . . .        | No gross observations on tissue | CHRONIC INFLAMMATION, Minimal, Multifocal.<br>HEPATOCELLULAR HYPERTROPHY, CENTRILOBULAR, Slight. |

The following tissues have no gross observations and were not examined microscopically:

|                 |                  |                  |                  |                 |
|-----------------|------------------|------------------|------------------|-----------------|
| ADRENALS        | AORTA            | BONE MARROW      | BRAIN            | CECUM           |
| COLON           | DIAPHRAGM        | DUODENUM         | EPIDIDYMIDES     | ESOPHAGUS       |
| EYES            | FEMUR            | HEART            | ILEUM            | JEJUNUM         |
| KIDNEYS         | MANDIBULAR L.N.  | MESENTERIC L.N.  | LUNG             | MAMMARY GLAND   |
| SKELETAL MUSCLE | SCIATIC NERVE    | OPTIC NERVES     | PANCREAS         | PITUITARY       |
| PROSTATE        | PARATHYROIDS     | SPINAL CORD CERV | SPINAL CORD THOR | MANDIBULAR S.G. |
| PAROTIDS        | STIFLE JOINT     | SKIN             | SPLEEN           | STOMACH         |
| STERNUM         | SEMINAL VESICLES | TESTES           | THYROIDS         | THYMUS          |
| TONGUE          | TRACHEA          | URINARY BLADDER  |                  |                 |

The following tissues have no gross observations and were marked as unremarkable microscopically:  
No tissue to list.

CONFIDENTIAL

Appendix 10  
Individual Animal Microscopic vs. Gross Observations

Fexinidazole

Study Number: 0504-2007

ANIMAL: 2767                      SEX: Male                      GROUP: 3                      DOSE LEVEL: 200 mg/kg  
DAY OF DEATH: 29 Test period                      STATUS: Scheduled phase sacrifice # 1                      TERMINAL BODY WEIGHT (g) : 276.7

| Tissue                 | Gross observations/comments     | Correlated Microscopic Observations                                                                                                        |
|------------------------|---------------------------------|--------------------------------------------------------------------------------------------------------------------------------------------|
| GENER. CONDITION . . . | GOOD                            | No micropathology observations on tissue.                                                                                                  |
| HARDERIAN GLANDS . . . | No gross observations on tissue | PORPHYRIN DEPOSITS, Slight, Multifocal.<br>HEMORRHAGE, UNILATERAL, Slight, Multifocal.<br>ADENITIS, UNILATERAL, Slight, Multifocal, Acute. |
| LIVER . . . . .        | No gross observations on tissue | CHRONIC INFLAMMATION, Slight, Multifocal.<br>HEPATOCELLULAR HYPERTROPHY, CENTRIOBULAR, Minimal.                                            |

The following tissues have no gross observations and were not examined microscopically:

- |                 |                  |                  |                  |                 |
|-----------------|------------------|------------------|------------------|-----------------|
| ADRENALS        | AORTA            | BONE MARROW      | BRAIN            | CECUM           |
| COLON           | DIAPHRAGM        | DUODENUM         | EPIDIDYMIDES     | ESOPHAGUS       |
| EYES            | FEMUR            | HEART            | ILEUM            | JEJUNUM         |
| KIDNEYS         | MANDIBULAR L.N.  | MESENTERIC L.N.  | LUNG             | MAMMARY GLAND   |
| SKELETAL MUSCLE | SCIATIC NERVE    | OPTIC NERVES     | PANCREAS         | PITUITARY       |
| PROSTATE        | PARATHYROIDS     | SPINAL CORD CERV | SPINAL CORD THOR | MANDIBULAR S.G. |
| PAROTIDS        | STIFLE JOINT     | SKIN             | SPLEEN           | STOMACH         |
| STERNUM         | SEMINAL VESICLES | TESTES           | THYROIDS         | THYMUS          |
| TONGUE          | TRACHEA          | URINARY BLADDER  |                  |                 |

The following tissues have no gross observations and were marked as unremarkable microscopically:  
No tissue to list.

CONFIDENTIAL

Appendix 10  
Individual Animal Microscopic vs. Gross Observations

Fexinidazole

Study Number: 0504-2007

ANIMAL: 2768                      SEX: Male                      GROUP: 3                      DOSE LEVEL: 200 mg/kg  
DAY OF DEATH: 29 Test period                      STATUS: Scheduled phase sacrifice # 1                      TERMINAL BODY WEIGHT (g) : 401.5

| Tissue                 | Gross observations/comments     | Correlated Microscopic Observations                                                                                                                            |
|------------------------|---------------------------------|----------------------------------------------------------------------------------------------------------------------------------------------------------------|
| GENER. CONDITION . . . | GOOD                            | No micropathology observations on tissue.                                                                                                                      |
| HARDERIAN GLANDS . . . | No gross observations on tissue | PORPHYRIN DEPOSITS, Slight, Multifocal.                                                                                                                        |
| LIVER . . . . .        | No gross observations on tissue | CHRONIC INFLAMMATION, Minimal, Multifocal.<br><br>HEPATOCELLULAR HYPERTROPHY, CENTRIOLOBULAR, Minimal.<br><br>HEPATOCELLULAR VACUOLATION, PERIPORTAL, Minimal. |

The following tissues have no gross observations and were not examined microscopically:

|                 |                  |                  |                  |                 |
|-----------------|------------------|------------------|------------------|-----------------|
| ADRENALS        | AORTA            | BONE MARROW      | BRAIN            | CECUM           |
| COLON           | DIAPHRAGM        | DUODENUM         | EPIDIDYMIDES     | ESOPHAGUS       |
| EYES            | FEMUR            | HEART            | ILEUM            | JEJUNUM         |
| KIDNEYS         | MANDIBULAR L.N.  | MESENTERIC L.N.  | LUNG             | MAMMARY GLAND   |
| SKELETAL MUSCLE | SCIATIC NERVE    | OPTIC NERVES     | PANCREAS         | PITUITARY       |
| PROSTATE        | PARATHYROIDS     | SPINAL CORD CERV | SPINAL CORD THOR | MANDIBULAR S.G. |
| PAROTIDS        | STIFLE JOINT     | SKIN             | SPLEEN           | STOMACH         |
| STERNUM         | SEMINAL VESICLES | TESTES           | THYROIDS         | THYMUS          |
| TONGUE          | TRACHEA          | URINARY BLADDER  |                  |                 |

The following tissues have no gross observations and were marked as unremarkable microscopically:  
No tissue to list.

CONFIDENTIAL

Appendix 10  
Individual Animal Microscopic vs. Gross Observations

Fexinidazole

Study Number: 0504-2007

ANIMAL: 2769                      SEX: Male                      GROUP: 3                      DOSE LEVEL: 200 mg/kg  
DAY OF DEATH: 29 Test period                      STATUS: Scheduled phase sacrifice # 1                      TERMINAL BODY WEIGHT (g) : 317.1

Tissue                      Gross observations/comments                      Correlated Microscopic Observations

GENER. CONDITION . . .                      GOOD                      No micropathology observations on tissue.

HARDERIAN GLANDS . . . No gross observations on tissue                      PORPHYRIN DEPOSITS, Moderate, Multifocal.  
ADENITIS, UNILATERAL, Slight, Multifocal,  
Acute.  
LYMPHOCYTIC INFILTRATION, Minimal,  
Multifocal, Unilateral..

LIVER . . . . . No gross observations on tissue                      CHRONIC INFLAMMATION, Minimal, Multifocal.  
HEPATOCELLULAR HYPERTROPHY, CENTRILOBULAR,  
Minimal.  
HEPATOCELLULAR VACUOLATION, PERIportal,  
Minimal.

The following tissues have no gross observations and were not examined microscopically:

|                 |                  |                  |                  |                 |
|-----------------|------------------|------------------|------------------|-----------------|
| ADRENALS        | AORTA            | BONE MARROW      | BRAIN            | CECUM           |
| COLON           | DIAPHRAGM        | DUODENUM         | EPIDIDYMIDES     | ESOPHAGUS       |
| EYES            | FEMUR            | HEART            | ILEUM            | JEJUNUM         |
| KIDNEYS         | MANDIBULAR L.N.  | MESENTERIC L.N.  | LUNG             | MAMMARY GLAND   |
| SKELETAL MUSCLE | SCIATIC NERVE    | OPTIC NERVES     | PANCREAS         | PITUITARY       |
| PROSTATE        | PARATHYROIDS     | SPINAL CORD CERV | SPINAL CORD THOR | MANDIBULAR S.G. |
| PAROTIDS        | STIFLE JOINT     | SKIN             | SPLEEN           | STOMACH         |
| STERNUM         | SEMINAL VESICLES | TESTES           | THYROIDS         | THYMUS          |
| TONGUE          | TRACHEA          | URINARY BLADDER  |                  |                 |

The following tissues have no gross observations and were marked as unremarkable microscopically:  
No tissue to list.

CONFIDENTIAL

Appendix 10  
Individual Animal Microscopic vs. Gross Observations

Fexinidazole

Study Number: 0504-2007

---

|                              |                                       |                            |                       |
|------------------------------|---------------------------------------|----------------------------|-----------------------|
| ANIMAL: 2770                 | SEX: Male                             | GROUP: 4                   | DOSE LEVEL: 800 mg/kg |
| DAY OF DEATH: 30 Test period | STATUS: Scheduled phase sacrifice # 1 | TERMINAL BODY WEIGHT (g) : | 353.3                 |

---

| Tissue                  | Gross observations/comments     | Correlated Microscopic Observations                                                                                                                                                                                                              |
|-------------------------|---------------------------------|--------------------------------------------------------------------------------------------------------------------------------------------------------------------------------------------------------------------------------------------------|
| GENER. CONDITION . . .  | GOOD                            | No micropathology observations on tissue.                                                                                                                                                                                                        |
| HARDERIAN GLANDS . . .  | No gross observations on tissue | PORPHYRIN DEPOSITS, Slight, Multifocal.                                                                                                                                                                                                          |
| LIVER . . . . .         | No gross observations on tissue | CHRONIC INFLAMMATION, Minimal, Multifocal.<br><br>HEPATOCELLULAR HYPERTROPHY, CENTRIOLOBULAR, Slight.<br><br>HEPATOCELLULAR VACUOLATION, PERIPORTAL, Minimal.<br><br>FOCAL NECROSIS, SUBCAPSULAR, Minimal. / with associated acute inflammation. |
| MANDIBULAR L.N. . . . . | No gross observations on tissue | PLASMACYTOSIS, Moderate, Diffuse, Unilateral..                                                                                                                                                                                                   |
| PROSTATE . . . . .      | No gross observations on tissue | LYMPHOCYTIC INFILTRATION, Minimal, Multifocal.                                                                                                                                                                                                   |
| PARATHYROIDS . . . . .  | No gross observations on tissue | ONLY ONE PARATHYROID AVAILABLE FOR EXAMINATION, Present.                                                                                                                                                                                         |

The following tissues have no gross observations and were not examined microscopically:  
No tissue to list.

CONFIDENTIAL

Appendix 10  
Individual Animal Microscopic vs. Gross Observations

Fexinidazole

Study Number: 0504-2007

---

|                              |                                       |                            |                       |
|------------------------------|---------------------------------------|----------------------------|-----------------------|
| ANIMAL: 2770                 | SEX: Male                             | GROUP: 4                   | DOSE LEVEL: 800 mg/kg |
| DAY OF DEATH: 30 Test period | STATUS: Scheduled phase sacrifice # 1 | TERMINAL BODY WEIGHT (g) : | 353.3                 |

---

| Tissue | Gross observations/comments | Correlated Microscopic Observations |
|--------|-----------------------------|-------------------------------------|
|--------|-----------------------------|-------------------------------------|

---

The following tissues have no gross observations and were marked as unremarkable microscopically:

|                  |                 |             |                  |                  |
|------------------|-----------------|-------------|------------------|------------------|
| ADRENALS         | AORTA           | BONE MARROW | BRAIN            | CECUM            |
| COLON            | DIAPHRAGM       | DUODENUM    | EPIDIDYMIDES     | ESOPHAGUS        |
| EYES             | FEMUR           | HEART       | ILEUM            | JEJUNUM          |
| KIDNEYS          | MESENTERIC L.N. | LUNG        | MAMMARY GLAND    | SKELETAL MUSCLE  |
| SCIATIC NERVE    | OPTIC NERVES    | PANCREAS    | PITUITARY        | SPINAL CORD CERV |
| SPINAL CORD THOR | MANDIBULAR S.G. | PAROTIDS    | STIFLE JOINT     | SKIN             |
| SPLEEN           | STOMACH         | STERNUM     | SEMINAL VESICLES | TESTES           |
| THYROIDS         | THYMUS          | TONGUE      | TRACHEA          | URINARY BLADDER  |

CONFIDENTIAL

Appendix 10  
Individual Animal Microscopic vs. Gross Observations

Fexinidazole

Study Number: 0504-2007

ANIMAL: 2771                      SEX: Male                      GROUP: 4                      DOSE LEVEL: 800 mg/kg  
DAY OF DEATH: 30 Test period                      STATUS: Scheduled phase sacrifice # 1                      TERMINAL BODY WEIGHT (g) : 344.7

| Tissue                  | Gross observations/comments     | Correlated Microscopic Observations                                                                                                                               |
|-------------------------|---------------------------------|-------------------------------------------------------------------------------------------------------------------------------------------------------------------|
| GENER. CONDITION . . .  | GOOD                            | No micropathology observations on tissue.                                                                                                                         |
| KIDNEYS . . . . .       | No gross observations on tissue | CORTICAL TUBULAR REGENERATIVE BASOPHILIA,<br>Minimal, Multifocal.                                                                                                 |
| HARDERIAN GLANDS . . .  | No gross observations on tissue | PORPHYRIN DEPOSITS, Slight, Multifocal.<br><br>LYMPHOCYTIC INFILTRATION, Minimal,<br>Multifocal.                                                                  |
| LIVER . . . . .         | No gross observations on tissue | CHRONIC INFLAMMATION, Minimal, Multifocal.<br><br>HEPATOCELLULAR HYPERTROPHY, CENTRIOBULAR,<br>Slight.<br><br>HEPATOCELLULAR VACUOLATION, PERIPORTAL,<br>Minimal. |
| MANDIBULAR L.N. . . . . | No gross observations on tissue | PLASMACYTOSIS, Slight, Diffuse.                                                                                                                                   |
| PARATHYROIDS . . . . .  | No gross observations on tissue | ONLY ONE PARATHYROID AVAILABLE FOR<br>EXAMINATION, Present.                                                                                                       |

The following tissues have no gross observations and were not examined microscopically:  
No tissue to list.

The following tissues have no gross observations and were marked as unremarkable microscopically:  
ADRENALS                      AORTA                      BONE MARROW                      BRAIN                      CECUM

CONFIDENTIAL

Appendix 10  
Individual Animal Microscopic vs. Gross Observations

Fexinidazole

Study Number: 0504-2007

---

|                              |                                       |                            |                       |
|------------------------------|---------------------------------------|----------------------------|-----------------------|
| ANIMAL: 2771                 | SEX: Male                             | GROUP: 4                   | DOSE LEVEL: 800 mg/kg |
| DAY OF DEATH: 30 Test period | STATUS: Scheduled phase sacrifice # 1 | TERMINAL BODY WEIGHT (g) : | 344.7                 |

---

| Tissue | Gross observations/comments | Correlated Microscopic Observations |
|--------|-----------------------------|-------------------------------------|
|--------|-----------------------------|-------------------------------------|

---

The following tissues have no gross observations and were marked as unremarkable microscopically:

|                  |                 |               |                  |                  |
|------------------|-----------------|---------------|------------------|------------------|
| COLON            | DIAPHRAGM       | DUODENUM      | EPIDIDYMIDES     | ESOPHAGUS        |
| EYES             | FEMUR           | HEART         | ILEUM            | JEJUNUM          |
| MESENTERIC L.N.  | LUNG            | MAMMARY GLAND | SKELETAL MUSCLE  | SCIATIC NERVE    |
| OPTIC NERVES     | PANCREAS        | PITUITARY     | PROSTATE         | SPINAL CORD CERV |
| SPINAL CORD THOR | MANDIBULAR S.G. | PAROTIDS      | STIFLE JOINT     | SKIN             |
| SPLEEN           | STOMACH         | STERNUM       | SEMINAL VESICLES | TESTES           |
| THYROIDS         | THYMUS          | TONGUE        | TRACHEA          | URINARY BLADDER  |



CONFIDENTIAL

Appendix 10  
Individual Animal Microscopic vs. Gross Observations

Fexinidazole

Study Number: 0504-2007

ANIMAL: 2772                      SEX: Male                      GROUP: 4                      DOSE LEVEL: 800 mg/kg  
DAY OF DEATH: 30 Test period                      STATUS: Scheduled phase sacrifice # 1                      TERMINAL BODY WEIGHT (g) : 411.0

| Tissue                  | Gross observations/comments     | Correlated Microscopic Observations                                                                                                                  |
|-------------------------|---------------------------------|------------------------------------------------------------------------------------------------------------------------------------------------------|
| ADRENALS . . . . .      | No gross observations on tissue | CORTICAL VACUOLATION, Slight, Diffuse.                                                                                                               |
| GENER. CONDITION . . .  | GOOD                            | No micropathology observations on tissue.                                                                                                            |
| KIDNEYS . . . . .       | No gross observations on tissue | PELVIC DILATATION, Slight.                                                                                                                           |
| HARDERIAN GLANDS . . .  | No gross observations on tissue | PORPHYRIN DEPOSITS, Minimal, Multifocal.                                                                                                             |
| LIVER . . . . .         | No gross observations on tissue | CHRONIC INFLAMMATION, Minimal, Multifocal.<br>HEPATOCELLULAR HYPERTROPHY, CENTRILOBULAR, Slight.<br>HEPATOCELLULAR VACUOLATION, PERIPORTAL, Minimal. |
| MANDIBULAR L.N. . . . . | No gross observations on tissue | PLASMACYTOSIS, Moderate, Diffuse, Unilateral..                                                                                                       |
| LUNG . . . . .          | No gross observations on tissue | ALVEOLAR MACROPHAGE INFILTRATION, Minimal, Multifocal.                                                                                               |
| PARATHYROIDS . . . . .  | No gross observations on tissue | ONLY ONE PARATHYROID AVAILABLE FOR EXAMINATION, Present.                                                                                             |
| SPLEEN . . . . .        | No gross observations on tissue | INFLAMMATION OF THE CAPSULE, Minimal, Multifocal, Chronic.                                                                                           |

CONFIDENTIAL

Appendix 10  
Individual Animal Microscopic vs. Gross Observations

Fexinidazole

Study Number: 0504-2007

---

|                              |                                       |                            |                       |
|------------------------------|---------------------------------------|----------------------------|-----------------------|
| ANIMAL: 2772                 | SEX: Male                             | GROUP: 4                   | DOSE LEVEL: 800 mg/kg |
| DAY OF DEATH: 30 Test period | STATUS: Scheduled phase sacrifice # 1 | TERMINAL BODY WEIGHT (g) : | 411.0                 |

---

| Tissue | Gross observations/comments | Correlated Microscopic Observations |
|--------|-----------------------------|-------------------------------------|
|--------|-----------------------------|-------------------------------------|

---

The following tissues have no gross observations and were not examined microscopically:  
No tissue to list.

The following tissues have no gross observations and were marked as unremarkable microscopically:

|                  |                 |                  |                  |                 |
|------------------|-----------------|------------------|------------------|-----------------|
| AORTA            | BONE MARROW     | BRAIN            | CECUM            | COLON           |
| DIAPHRAGM        | DUODENUM        | EPIDIDYMIDES     | ESOPHAGUS        | EYES            |
| FEMUR            | HEART           | ILEUM            | JEJUNUM          | MESENTERIC L.N. |
| MAMMARY GLAND    | SKELETAL MUSCLE | SCIATIC NERVE    | OPTIC NERVES     | PANCREAS        |
| PITUITARY        | PROSTATE        | SPINAL CORD CERV | SPINAL CORD THOR | MANDIBULAR S.G. |
| PAROTIDS         | STIFLE JOINT    | SKIN             | STOMACH          | STERNUM         |
| SEMINAL VESICLES | TESTES          | THYROIDS         | THYMUS           | TONGUE          |
| TRACHEA          | URINARY BLADDER |                  |                  |                 |

CONFIDENTIAL

Appendix 10  
Individual Animal Microscopic vs. Gross Observations

Fexinidazole

Study Number: 0504-2007

ANIMAL: 2773                      SEX: Male                      GROUP: 4                      DOSE LEVEL: 800 mg/kg  
DAY OF DEATH: 30 Test period                      STATUS: Scheduled phase sacrifice # 1                      TERMINAL BODY WEIGHT (g) : 298.5

| Tissue                  | Gross observations/comments     | Correlated Microscopic Observations                                                                    |
|-------------------------|---------------------------------|--------------------------------------------------------------------------------------------------------|
| GENER. CONDITION . . .  | GOOD                            | No micropathology observations on tissue.                                                              |
| KIDNEYS . . . . .       | No gross observations on tissue | CORTICAL TUBULAR REGENERATIVE BASOPHILIA,<br>Minimal, Multifocal, Unilateral left..                    |
| HARDERIAN GLANDS . . .  | No gross observations on tissue | PORPHYRIN DEPOSITS, Slight, Multifocal.                                                                |
| LIVER . . . . .         | No gross observations on tissue | CHRONIC INFLAMMATION, Minimal, Multifocal.<br><br>HEPATOCELLULAR HYPERTROPHY, CENTRIOBULAR,<br>Slight. |
| MANDIBULAR L.N. . . . . | No gross observations on tissue | PLASMACYTOSIS, Moderate, Diffuse.                                                                      |
| LUNG . . . . .          | No gross observations on tissue | ALVEOLAR MACROPHAGE INFILTRATION, Minimal,<br>Multifocal.                                              |
| OPTIC NERVES . . . . .  | No gross observations on tissue | ONLY ONE NERVE IS AVAILABLE FOR<br>EXAMINATION, Present.                                               |
| PARATHYROIDS . . . . .  | No gross observations on tissue | ONLY ONE PARATHYROID AVAILABLE FOR<br>EXAMINATION, Present.                                            |

The following tissues have no gross observations and were not examined microscopically:  
No tissue to list.

CONFIDENTIAL

Appendix 10  
Individual Animal Microscopic vs. Gross Observations

Fexinidazole

Study Number: 0504-2007

---

|                              |                                       |                            |                       |
|------------------------------|---------------------------------------|----------------------------|-----------------------|
| ANIMAL: 2773                 | SEX: Male                             | GROUP: 4                   | DOSE LEVEL: 800 mg/kg |
| DAY OF DEATH: 30 Test period | STATUS: Scheduled phase sacrifice # 1 | TERMINAL BODY WEIGHT (g) : | 298.5                 |

---

| Tissue | Gross observations/comments | Correlated Microscopic Observations |
|--------|-----------------------------|-------------------------------------|
|--------|-----------------------------|-------------------------------------|

---

The following tissues have no gross observations and were marked as unremarkable microscopically:

|                 |                  |                  |                  |                 |
|-----------------|------------------|------------------|------------------|-----------------|
| ADRENALS        | AORTA            | BONE MARROW      | BRAIN            | CECUM           |
| COLON           | DIAPHRAGM        | DUODENUM         | EPIDIDYMIDES     | ESOPHAGUS       |
| EYES            | FEMUR            | HEART            | ILEUM            | JEJUNUM         |
| MESENTERIC L.N. | MAMMARY GLAND    | SKELETAL MUSCLE  | SCIATIC NERVE    | PANCREAS        |
| PITUITARY       | PROSTATE         | SPINAL CORD CERV | SPINAL CORD THOR | MANDIBULAR S.G. |
| PAROTIDS        | STIFLE JOINT     | SKIN             | SPLEEN           | STOMACH         |
| STERNUM         | SEMINAL VESICLES | TESTES           | THYROIDS         | THYMUS          |
| TONGUE          | TRACHEA          | URINARY BLADDER  |                  |                 |

CONFIDENTIAL

Appendix 10  
Individual Animal Microscopic vs. Gross Observations

Fexinidazole

Study Number: 0504-2007

ANIMAL: 2774                      SEX: Male                      GROUP: 4                      DOSE LEVEL: 800 mg/kg  
DAY OF DEATH: 30 Test period                      STATUS: Scheduled phase sacrifice # 1                      TERMINAL BODY WEIGHT (g) : 293.6

| Tissue                  | Gross observations/comments     | Correlated Microscopic Observations                                                                  |
|-------------------------|---------------------------------|------------------------------------------------------------------------------------------------------|
| ADRENALS . . . . .      | No gross observations on tissue | CORTICAL VACUOLATION, Minimal, Multifocal.                                                           |
| GENER. CONDITION . . .  | GOOD                            | No micropathology observations on tissue.                                                            |
| HARDERIAN GLANDS . . .  | No gross observations on tissue | PORPHYRIN DEPOSITS, Slight, Multifocal.                                                              |
| LIVER . . . . .         | No gross observations on tissue | CHRONIC INFLAMMATION, Minimal, Multifocal.<br>HEPATOCELLULAR HYPERTROPHY, CENTRIOLOBULAR,<br>Slight. |
| MANDIBULAR L.N. . . . . | No gross observations on tissue | PLASMACYTOSIS, Moderate, Diffuse.                                                                    |
| PARATHYROIDS . . . . .  | No gross observations on tissue | ONLY ONE PARATHYROID AVAILABLE FOR<br>EXAMINATION, Present.                                          |

The following tissues have no gross observations and were not examined microscopically:  
No tissue to list.

The following tissues have no gross observations and were marked as unremarkable microscopically:

|                  |                 |               |                  |                  |
|------------------|-----------------|---------------|------------------|------------------|
| AORTA            | BONE MARROW     | BRAIN         | CECUM            | COLON            |
| DIAPHRAGM        | DUODENUM        | EPIDIDYMIDES  | ESOPHAGUS        | EYES             |
| FEMUR            | HEART           | ILEUM         | JEJUNUM          | KIDNEYS          |
| MESENTERIC L.N.  | LUNG            | MAMMARY GLAND | SKELETAL MUSCLE  | SCIATIC NERVE    |
| OPTIC NERVES     | PANCREAS        | PITUITARY     | PROSTATE         | SPINAL CORD CERV |
| SPINAL CORD THOR | MANDIBULAR S.G. | PAROTIDS      | STIFLE JOINT     | SKIN             |
| SPLEEN           | STOMACH         | STERNUM       | SEMINAL VESICLES | TESTES           |
| THYROIDS         | THYMUS          | TONGUE        | TRACHEA          | URINARY BLADDER  |

CONFIDENTIAL

Appendix 10  
Individual Animal Microscopic vs. Gross Observations

Fexinidazole

Study Number: 0504-2007

ANIMAL: 2775                      SEX: Male                      GROUP: 4                      DOSE LEVEL: 800 mg/kg  
DAY OF DEATH: 29 Test period                      STATUS: Scheduled phase sacrifice # 1                      TERMINAL BODY WEIGHT (g) : 385.0

| Tissue                  | Gross observations/comments     | Correlated Microscopic Observations                                                                                                                |
|-------------------------|---------------------------------|----------------------------------------------------------------------------------------------------------------------------------------------------|
| GENER. CONDITION . . .  | GOOD                            | No micropathology observations on tissue.                                                                                                          |
| HEART . . . . .         | No gross observations on tissue | MYOCARDIAL INFLAMMATION, Minimal, Multifocal.                                                                                                      |
| HARDERIAN GLANDS . . .  | No gross observations on tissue | PORPHYRIN DEPOSITS, Minimal, Multifocal.<br>LYMPHOCYTIC INFILTRATION, Minimal, Focal, Unilateral..                                                 |
| LIVER . . . . .         | No gross observations on tissue | CHRONIC INFLAMMATION, Slight, Multifocal.<br>HEPATOCELLULAR HYPERTROPHY, CENTRIOBULAR, Slight.<br>HEPATOCELLULAR VACUOLATION, PERIPORTAL, Minimal. |
| MANDIBULAR L.N. . . . . | No gross observations on tissue | PLASMACYTOSIS, Slight, Diffuse.                                                                                                                    |
| OPTIC NERVES . . . . .  | No gross observations on tissue | ONLY ONE NERVE IS AVAILABLE FOR EXAMINATION, Present.                                                                                              |
| SPLEEN . . . . .        | No gross observations on tissue | EXTRAMEDULLARY HEMOPOIESIS, Minimal, Multifocal.                                                                                                   |

The following tissues have no gross observations and were not examined microscopically:  
No tissue to list.

CONFIDENTIAL

Appendix 10  
Individual Animal Microscopic vs. Gross Observations

Fexinidazole

Study Number: 0504-2007

---

|                              |                                       |                            |                       |
|------------------------------|---------------------------------------|----------------------------|-----------------------|
| ANIMAL: 2775                 | SEX: Male                             | GROUP: 4                   | DOSE LEVEL: 800 mg/kg |
| DAY OF DEATH: 29 Test period | STATUS: Scheduled phase sacrifice # 1 | TERMINAL BODY WEIGHT (g) : | 385.0                 |

---

| Tissue | Gross observations/comments | Correlated Microscopic Observations |
|--------|-----------------------------|-------------------------------------|
|--------|-----------------------------|-------------------------------------|

---

The following tissues have no gross observations and were marked as unremarkable microscopically:

|                  |                 |                  |                 |                  |
|------------------|-----------------|------------------|-----------------|------------------|
| ADRENALS         | AORTA           | BONE MARROW      | BRAIN           | CECUM            |
| COLON            | DIAPHRAGM       | DUODENUM         | EPIDIDYMIDES    | ESOPHAGUS        |
| EYES             | FEMUR           | ILEUM            | JEJUNUM         | KIDNEYS          |
| MESENTERIC L.N.  | LUNG            | MAMMARY GLAND    | SKELETAL MUSCLE | SCIATIC NERVE    |
| PANCREAS         | PITUITARY       | PROSTATE         | PARATHYROIDS    | SPINAL CORD CERV |
| SPINAL CORD THOR | MANDIBULAR S.G. | PAROTIDS         | STIFLE JOINT    | SKIN             |
| STOMACH          | STERNUM         | SEMINAL VESICLES | TESTES          | THYROIDS         |
| THYMUS           | TONGUE          | TRACHEA          | URINARY BLADDER |                  |

CONFIDENTIAL

Appendix 10  
Individual Animal Microscopic vs. Gross Observations

Fexinidazole

Study Number: 0504-2007

ANIMAL: 2776                      SEX: Male                      GROUP: 4                      DOSE LEVEL: 800 mg/kg  
DAY OF DEATH: 29 Test period                      STATUS: Scheduled phase sacrifice # 1                      TERMINAL BODY WEIGHT (g) : 338.8

| Tissue                  | Gross observations/comments     | Correlated Microscopic Observations                                                                                 |
|-------------------------|---------------------------------|---------------------------------------------------------------------------------------------------------------------|
| GENER. CONDITION . . .  | GOOD                            | No micropathology observations on tissue.                                                                           |
| KIDNEYS . . . . .       | No gross observations on tissue | CHRONIC INFLAMMATION, Minimal, Multifocal.<br><br>CORTICAL TUBULAR REGENERATIVE BASOPHILIA,<br>Minimal, Multifocal. |
| HARDERIAN GLANDS . . .  | No gross observations on tissue | PORPHYRIN DEPOSITS, Slight, Multifocal.                                                                             |
| LIVER . . . . .         | No gross observations on tissue | CHRONIC INFLAMMATION, Minimal, Multifocal.<br><br>HEPATOCELLULAR HYPERTROPHY, CENTRILOBULAR,<br>Slight.             |
| MANDIBULAR L.N. . . . . | No gross observations on tissue | PLASMACYTOSIS, Moderate, Diffuse.                                                                                   |
| LUNG . . . . .          | No gross observations on tissue | ALVEOLAR HEMORRHAGE, Slight, Focal.                                                                                 |
| MAMMARY GLAND . . . . . | No gross observations on tissue | CERVICAL MAMMARY GLAND EXAMINED, Present.                                                                           |
| PARATHYROIDS . . . . .  | No gross observations on tissue | ONLY ONE PARATHYROID AVAILABLE FOR<br>EXAMINATION, Present.                                                         |

The following tissues have no gross observations and were not examined microscopically:  
No tissue to list.



CONFIDENTIAL

Appendix 10  
Individual Animal Microscopic vs. Gross Observations

Fexinidazole

Study Number: 0504-2007

---

|                              |                                       |                            |                       |
|------------------------------|---------------------------------------|----------------------------|-----------------------|
| ANIMAL: 2776                 | SEX: Male                             | GROUP: 4                   | DOSE LEVEL: 800 mg/kg |
| DAY OF DEATH: 29 Test period | STATUS: Scheduled phase sacrifice # 1 | TERMINAL BODY WEIGHT (g) : | 338.8                 |

---

| Tissue | Gross observations/comments | Correlated Microscopic Observations |
|--------|-----------------------------|-------------------------------------|
|--------|-----------------------------|-------------------------------------|

---

The following tissues have no gross observations and were marked as unremarkable microscopically:

|                 |                  |                  |                  |                 |
|-----------------|------------------|------------------|------------------|-----------------|
| ADRENALS        | AORTA            | BONE MARROW      | BRAIN            | CECUM           |
| COLON           | DIAPHRAGM        | DUODENUM         | EPIDIDYMIDES     | ESOPHAGUS       |
| EYES            | FEMUR            | HEART            | ILEUM            | JEJUNUM         |
| MESENTERIC L.N. | SKELETAL MUSCLE  | SCIATIC NERVE    | OPTIC NERVES     | PANCREAS        |
| PITUITARY       | PROSTATE         | SPINAL CORD CERV | SPINAL CORD THOR | MANDIBULAR S.G. |
| PAROTIDS        | STIFLE JOINT     | SKIN             | SPLEEN           | STOMACH         |
| STERNUM         | SEMINAL VESICLES | TESTES           | THYROIDS         | THYMUS          |
| TONGUE          | TRACHEA          | URINARY BLADDER  |                  |                 |

CONFIDENTIAL

Appendix 10  
Individual Animal Microscopic vs. Gross Observations

Fexinidazole

Study Number: 0504-2007

ANIMAL: 2777                      SEX: Male                      GROUP: 4                      DOSE LEVEL: 800 mg/kg  
DAY OF DEATH: 29 Test period                      STATUS: Scheduled phase sacrifice # 1                      TERMINAL BODY WEIGHT (g) : 351.0

| Tissue                  | Gross observations/comments     | Correlated Microscopic Observations                                                                                                             |
|-------------------------|---------------------------------|-------------------------------------------------------------------------------------------------------------------------------------------------|
| GENER. CONDITION . . .  | GOOD                            | No micropathology observations on tissue.                                                                                                       |
| HEART . . . . .         | No gross observations on tissue | MYOCARDIAL INFLAMMATION, Minimal, Focal, Chronic.                                                                                               |
| KIDNEYS . . . . .       | No gross observations on tissue | CHRONIC INFLAMMATION, Minimal, Multifocal.                                                                                                      |
| HARDERIAN GLANDS . . .  | No gross observations on tissue | PORPHYRIN DEPOSITS, Minimal, Multifocal.                                                                                                        |
| LIVER . . . . .         | No gross observations on tissue | CHRONIC INFLAMMATION, Minimal, Multifocal.<br>HEPATOCELLULAR HYPERTROPHY, CENTRIOBULAR, Slight.<br>HEPATOCELLULAR VACUOLATION, DIFFUSE, Slight. |
| MANDIBULAR L.N. . . . . | No gross observations on tissue | PLASMACYTOSIS, Slight, Diffuse.                                                                                                                 |
| LUNG . . . . .          | No gross observations on tissue | ALVEOLAR HEMORRHAGE, Slight, Focal.<br>ALVEOLAR MACROPHAGE INFILTRATION, Minimal, Multifocal.                                                   |

The following tissues have no gross observations and were not examined microscopically:  
No tissue to list.

CONFIDENTIAL

Appendix 10  
Individual Animal Microscopic vs. Gross Observations

Fexinidazole

Study Number: 0504-2007

---

|                              |                                       |                            |                       |
|------------------------------|---------------------------------------|----------------------------|-----------------------|
| ANIMAL: 2777                 | SEX: Male                             | GROUP: 4                   | DOSE LEVEL: 800 mg/kg |
| DAY OF DEATH: 29 Test period | STATUS: Scheduled phase sacrifice # 1 | TERMINAL BODY WEIGHT (g) : | 351.0                 |

---

| Tissue | Gross observations/comments | Correlated Microscopic Observations |
|--------|-----------------------------|-------------------------------------|
|--------|-----------------------------|-------------------------------------|

---

The following tissues have no gross observations and were marked as unremarkable microscopically:

|                 |                 |                  |                  |                  |
|-----------------|-----------------|------------------|------------------|------------------|
| ADRENALS        | AORTA           | BONE MARROW      | BRAIN            | CECUM            |
| COLON           | DIAPHRAGM       | DUODENUM         | EPIDIDYMIDES     | ESOPHAGUS        |
| EYES            | FEMUR           | ILEUM            | JEJUNUM          | MESENTERIC L.N.  |
| MAMMARY GLAND   | SKELETAL MUSCLE | SCIATIC NERVE    | OPTIC NERVES     | PANCREAS         |
| PITUITARY       | PROSTATE        | PARATHYROIDS     | SPINAL CORD CERV | SPINAL CORD THOR |
| MANDIBULAR S.G. | PAROTIDS        | STIFLE JOINT     | SKIN             | SPLEEN           |
| STOMACH         | STERNUM         | SEMINAL VESICLES | TESTES           | THYROIDS         |
| THYMUS          | TONGUE          | TRACHEA          | URINARY BLADDER  |                  |

CONFIDENTIAL

Appendix 10  
Individual Animal Microscopic vs. Gross Observations

Fexinidazole

Study Number: 0504-2007

ANIMAL: 2778                      SEX: Male                      GROUP: 4                      DOSE LEVEL: 800 mg/kg  
DAY OF DEATH: 29 Test period                      STATUS: Scheduled phase sacrifice # 1                      TERMINAL BODY WEIGHT (g) : 338.8

| Tissue                  | Gross observations/comments     | Correlated Microscopic Observations                                                                  |
|-------------------------|---------------------------------|------------------------------------------------------------------------------------------------------|
| GENER. CONDITION . . .  | GOOD                            | No micropathology observations on tissue.                                                            |
| HARDERIAN GLANDS . . .  | No gross observations on tissue | PORPHYRIN DEPOSITS, Minimal, Multifocal.                                                             |
| LIVER . . . . .         | No gross observations on tissue | CHRONIC INFLAMMATION, Minimal, Multifocal.<br>HEPATOCELLULAR HYPERTROPHY, CENTRIOLOBULAR,<br>Slight. |
| MANDIBULAR L.N. . . . . | No gross observations on tissue | PLASMACYTOSIS, Slight, Diffuse.                                                                      |
| LUNG . . . . .          | No gross observations on tissue | ALVEOLAR MACROPHAGE INFILTRATION, Minimal,<br>Multifocal.                                            |
| SPLEEN . . . . .        | No gross observations on tissue | EXTRAMEDULLARY HEMOPOIESIS, Minimal,<br>Multifocal.                                                  |

The following tissues have no gross observations and were not examined microscopically:  
No tissue to list.

The following tissues have no gross observations and were marked as unremarkable microscopically:

|                  |                  |                 |                  |               |
|------------------|------------------|-----------------|------------------|---------------|
| ADRENALS         | AORTA            | BONE MARROW     | BRAIN            | CECUM         |
| COLON            | DIAPHRAGM        | DUODENUM        | EPIDIDYMIDES     | ESOPHAGUS     |
| EYES             | FEMUR            | HEART           | ILEUM            | JEJUNUM       |
| KIDNEYS          | MESENTERIC L.N.  | MAMMARY GLAND   | SKELETAL MUSCLE  | SCIATIC NERVE |
| OPTIC NERVES     | PANCREAS         | PITUITARY       | PROSTATE         | PARATHYROIDS  |
| SPINAL CORD CERV | SPINAL CORD THOR | MANDIBULAR S.G. | PAROTIDS         | STIFLE JOINT  |
| SKIN             | STOMACH          | STERNUM         | SEMINAL VESICLES | TESTES        |

CONFIDENTIAL

Appendix 10  
Individual Animal Microscopic vs. Gross Observations

Fexinidazole

Study Number: 0504-2007

---

|                              |                                       |                            |                       |
|------------------------------|---------------------------------------|----------------------------|-----------------------|
| ANIMAL: 2778                 | SEX: Male                             | GROUP: 4                   | DOSE LEVEL: 800 mg/kg |
| DAY OF DEATH: 29 Test period | STATUS: Scheduled phase sacrifice # 1 | TERMINAL BODY WEIGHT (g) : | 338.8                 |

---

| Tissue | Gross observations/comments | Correlated Microscopic Observations |
|--------|-----------------------------|-------------------------------------|
|--------|-----------------------------|-------------------------------------|

---

|          |        |        |         |                 |
|----------|--------|--------|---------|-----------------|
| THYROIDS | THYMUS | TONGUE | TRACHEA | URINARY BLADDER |
|----------|--------|--------|---------|-----------------|

---

CONFIDENTIAL

Appendix 10  
Individual Animal Microscopic vs. Gross Observations

Fexinidazole

Study Number: 0504-2007

ANIMAL: 2779                      SEX: Male                      GROUP: 4                      DOSE LEVEL: 800 mg/kg  
DAY OF DEATH: 29 Test period                      STATUS: Scheduled phase sacrifice # 1                      TERMINAL BODY WEIGHT (g) : 322.7

| Tissue                  | Gross observations/comments     | Correlated Microscopic Observations                                                              |
|-------------------------|---------------------------------|--------------------------------------------------------------------------------------------------|
| GENER. CONDITION . . .  | GOOD                            | No micropathology observations on tissue.                                                        |
| HARDERIAN GLANDS . . .  | No gross observations on tissue | PORPHYRIN DEPOSITS, Moderate, Multifocal.                                                        |
| LIVER . . . . .         | No gross observations on tissue | CHRONIC INFLAMMATION, Slight, Multifocal.<br>HEPATOCELLULAR HYPERTROPHY, CENTRIOLOBULAR, Slight. |
| MANDIBULAR L.N. . . . . | No gross observations on tissue | PLASMACYTOSIS, Marked, Diffuse, Unilateral..                                                     |
| PROSTATE . . . . .      | No gross observations on tissue | LYMPHOCYTIC INFILTRATION, Minimal, Multifocal.                                                   |
| PARATHYROIDS . . . . .  | No gross observations on tissue | ONLY ONE PARATHYROID AVAILABLE FOR EXAMINATION, Present.                                         |

The following tissues have no gross observations and were not examined microscopically:  
No tissue to list.

The following tissues have no gross observations and were marked as unremarkable microscopically:

|                  |                 |             |               |                  |
|------------------|-----------------|-------------|---------------|------------------|
| ADRENALS         | AORTA           | BONE MARROW | BRAIN         | CECUM            |
| COLON            | DIAPHRAGM       | DUODENUM    | EPIDIDYMIDES  | ESOPHAGUS        |
| EYES             | FEMUR           | HEART       | ILEUM         | JEJUNUM          |
| KIDNEYS          | MESENTERIC L.N. | LUNG        | MAMMARY GLAND | SKELETAL MUSCLE  |
| SCIATIC NERVE    | OPTIC NERVES    | PANCREAS    | PITUITARY     | SPINAL CORD CERV |
| SPINAL CORD THOR | MANDIBULAR S.G. | PAROTIDS    | STIFLE JOINT  | SKIN             |

CONFIDENTIAL

Appendix 10  
Individual Animal Microscopic vs. Gross Observations

Fexinidazole

Study Number: 0504-2007

---

|                              |                                       |                            |                       |
|------------------------------|---------------------------------------|----------------------------|-----------------------|
| ANIMAL: 2779                 | SEX: Male                             | GROUP: 4                   | DOSE LEVEL: 800 mg/kg |
| DAY OF DEATH: 29 Test period | STATUS: Scheduled phase sacrifice # 1 | TERMINAL BODY WEIGHT (g) : | 322.7                 |

---

| Tissue | Gross observations/comments | Correlated Microscopic Observations |
|--------|-----------------------------|-------------------------------------|
|--------|-----------------------------|-------------------------------------|

---

|          |         |         |                  |                 |
|----------|---------|---------|------------------|-----------------|
| SPLEEN   | STOMACH | STERNUM | SEMINAL VESICLES | TESTES          |
| THYROIDS | THYMUS  | TONGUE  | TRACHEA          | URINARY BLADDER |

CONFIDENTIAL

Appendix 10  
Individual Animal Microscopic vs. Gross Observations

Fexinidazole

Study Number: 0504-2007

ANIMAL: 2780                      SEX: Male                      GROUP: 4                      DOSE LEVEL: 800 mg/kg  
DAY OF DEATH: 43 Test period                      STATUS: Final phase sacrifice                      TERMINAL BODY WEIGHT (g) : 369.0

| Tissue                 | Gross observations/comments     | Correlated Microscopic Observations                                                               |
|------------------------|---------------------------------|---------------------------------------------------------------------------------------------------|
| GENER. CONDITION . . . | GOOD                            | No micropathology observations on tissue.                                                         |
| HARDERIAN GLANDS . . . | No gross observations on tissue | PORPHYRIN DEPOSITS, Slight, Multifocal.<br>HEMORRHAGE, UNILATERAL, Moderate, Focal.               |
| LIVER . . . . .        | No gross observations on tissue | CHRONIC INFLAMMATION, Minimal, Multifocal.<br>HEPATOCELLULAR VACUOLATION, PERIportal,<br>Minimal. |

The following tissues have no gross observations and were not examined microscopically:

|                 |                  |                  |                  |                 |
|-----------------|------------------|------------------|------------------|-----------------|
| ADRENALS        | AORTA            | BONE MARROW      | BRAIN            | CECUM           |
| COLON           | DIAPHRAGM        | DUODENUM         | EPIDIDYMIDES     | ESOPHAGUS       |
| EYES            | FEMUR            | HEART            | ILEUM            | JEJUNUM         |
| KIDNEYS         | MANDIBULAR L.N.  | MESENTERIC L.N.  | LUNG             | MAMMARY GLAND   |
| SKELETAL MUSCLE | SCIATIC NERVE    | OPTIC NERVES     | PANCREAS         | PITUITARY       |
| PROSTATE        | PARATHYROIDS     | SPINAL CORD CERV | SPINAL CORD THOR | MANDIBULAR S.G. |
| PAROTIDS        | STIFLE JOINT     | SKIN             | SPLEEN           | STOMACH         |
| STERNUM         | SEMINAL VESICLES | TESTES           | THYROIDS         | THYMUS          |
| TONGUE          | TRACHEA          | URINARY BLADDER  |                  |                 |

The following tissues have no gross observations and were marked as unremarkable microscopically:  
No tissue to list.



CONFIDENTIAL

Appendix 10  
Individual Animal Microscopic vs. Gross Observations

Fexinidazole

Study Number: 0504-2007

ANIMAL: 2781                      SEX: Male                      GROUP: 4                      DOSE LEVEL: 800 mg/kg  
DAY OF DEATH: 43 Test period                      STATUS: Final phase sacrifice                      TERMINAL BODY WEIGHT (g) : 341.6

| Tissue                 | Gross observations/comments     | Correlated Microscopic Observations                                                       |
|------------------------|---------------------------------|-------------------------------------------------------------------------------------------|
| GENER. CONDITION . . . | GOOD                            | No micropathology observations on tissue.                                                 |
| HARDERIAN GLANDS . . . | No gross observations on tissue | PORPHYRIN DEPOSITS, Moderate, Multifocal.<br>HEMORRHAGE, UNILATERAL, Minimal, Multifocal. |
| LIVER . . . . .        | No gross observations on tissue | CHRONIC INFLAMMATION, Minimal, Multifocal.                                                |

The following tissues have no gross observations and were not examined microscopically:

|                 |                  |                  |                  |                 |
|-----------------|------------------|------------------|------------------|-----------------|
| ADRENALS        | AORTA            | BONE MARROW      | BRAIN            | CECUM           |
| COLON           | DIAPHRAGM        | DUODENUM         | EPIDIDYIMIDES    | ESOPHAGUS       |
| EYES            | FEMUR            | HEART            | ILEUM            | JEJUNUM         |
| KIDNEYS         | MANDIBULAR L.N.  | MESENTERIC L.N.  | LUNG             | MAMMARY GLAND   |
| SKELETAL MUSCLE | SCIATIC NERVE    | OPTIC NERVES     | PANCREAS         | PITUITARY       |
| PROSTATE        | PARATHYROIDS     | SPINAL CORD CERV | SPINAL CORD THOR | MANDIBULAR S.G. |
| PAROTIDS        | STIFLE JOINT     | SKIN             | SPLEEN           | STOMACH         |
| STERNUM         | SEMINAL VESICLES | TESTES           | THYROIDS         | THYMUS          |
| TONGUE          | TRACHEA          | URINARY BLADDER  |                  |                 |

The following tissues have no gross observations and were marked as unremarkable microscopically:  
No tissue to list.

CONFIDENTIAL

Appendix 10  
Individual Animal Microscopic vs. Gross Observations

Fexinidazole

Study Number: 0504-2007

|                              |                               |                            |                       |
|------------------------------|-------------------------------|----------------------------|-----------------------|
| ANIMAL: 2782                 | SEX: Male                     | GROUP: 4                   | DOSE LEVEL: 800 mg/kg |
| DAY OF DEATH: 43 Test period | STATUS: Final phase sacrifice | TERMINAL BODY WEIGHT (g) : | 359.3                 |

| Tissue                 | Gross observations/comments     | Correlated Microscopic Observations                                                                                                          |
|------------------------|---------------------------------|----------------------------------------------------------------------------------------------------------------------------------------------|
| GENER. CONDITION . . . | GOOD                            | No micropathology observations on tissue.                                                                                                    |
| HARDERIAN GLANDS . . . | No gross observations on tissue | PORPHYRIN DEPOSITS, Moderate, Multifocal.<br>HEMORRHAGE, UNILATERAL, Slight, Multifocal.<br>ADENITIS, UNILATERAL, Slight, Multifocal, Acute. |
| LIVER . . . . .        | No gross observations on tissue | CHRONIC INFLAMMATION, Minimal, Multifocal.<br>HEPATOCELLULAR HYPERTROPHY, CENTRIOBULAR, Minimal.                                             |

The following tissues have no gross observations and were not examined microscopically:

|                 |                  |                  |                  |                 |
|-----------------|------------------|------------------|------------------|-----------------|
| ADRENALS        | AORTA            | BONE MARROW      | BRAIN            | CECUM           |
| COLON           | DIAPHRAGM        | DUODENUM         | EPIDIDYMIDES     | ESOPHAGUS       |
| EYES            | FEMUR            | HEART            | ILEUM            | JEJUNUM         |
| KIDNEYS         | MANDIBULAR L.N.  | MESENTERIC L.N.  | LUNG             | MAMMARY GLAND   |
| SKELETAL MUSCLE | SCIATIC NERVE    | OPTIC NERVES     | PANCREAS         | PITUITARY       |
| PROSTATE        | PARATHYROIDS     | SPINAL CORD CERV | SPINAL CORD THOR | MANDIBULAR S.G. |
| PAROTIDS        | STIFLE JOINT     | SKIN             | SPLEEN           | STOMACH         |
| STERNUM         | SEMINAL VESICLES | TESTES           | THYROIDS         | THYMUS          |
| TONGUE          | TRACHEA          | URINARY BLADDER  |                  |                 |

The following tissues have no gross observations and were marked as unremarkable microscopically:  
No tissue to list.



CONFIDENTIAL

Appendix 10  
Individual Animal Microscopic vs. Gross Observations

Fexinidazole

Study Number: 0504-2007

|                              |                               |                            |                       |
|------------------------------|-------------------------------|----------------------------|-----------------------|
| ANIMAL: 2784                 | SEX: Male                     | GROUP: 4                   | DOSE LEVEL: 800 mg/kg |
| DAY OF DEATH: 43 Test period | STATUS: Final phase sacrifice | TERMINAL BODY WEIGHT (g) : | 385.5                 |

| Tissue                 | Gross observations/comments     | Correlated Microscopic Observations                                                                    |
|------------------------|---------------------------------|--------------------------------------------------------------------------------------------------------|
| GENER. CONDITION . . . | GOOD                            | No micropathology observations on tissue.                                                              |
| HARDERIAN GLANDS . . . | No gross observations on tissue | PORPHYRIN DEPOSITS, Moderate, Multifocal.<br><br>ADENITIS, UNILATERAL, Slight, Focal, Chronic.         |
| LIVER . . . . .        | No gross observations on tissue | CHRONIC INFLAMMATION, Minimal, Multifocal.<br><br>HEPATOCELLULAR HYPERTROPHY, CENTRIOLOBULAR, Minimal. |

The following tissues have no gross observations and were not examined microscopically:

|                 |                  |                  |                  |                 |
|-----------------|------------------|------------------|------------------|-----------------|
| ADRENALS        | AORTA            | BONE MARROW      | BRAIN            | CECUM           |
| COLON           | DIAPHRAGM        | DUODENUM         | EPIDIDYMIDES     | ESOPHAGUS       |
| EYES            | FEMUR            | HEART            | ILEUM            | JEJUNUM         |
| KIDNEYS         | MANDIBULAR L.N.  | MESENTERIC L.N.  | LUNG             | MAMMARY GLAND   |
| SKELETAL MUSCLE | SCIATIC NERVE    | OPTIC NERVES     | PANCREAS         | PITUITARY       |
| PROSTATE        | PARATHYROIDS     | SPINAL CORD CERV | SPINAL CORD THOR | MANDIBULAR S.G. |
| PAROTIDS        | STIFLE JOINT     | SKIN             | SPLEEN           | STOMACH         |
| STERNUM         | SEMINAL VESICLES | TESTES           | THYROIDS         | THYMUS          |
| TONGUE          | TRACHEA          | URINARY BLADDER  |                  |                 |

The following tissues have no gross observations and were marked as unremarkable microscopically:  
No tissue to list.

CONFIDENTIAL

Appendix 10  
Individual Animal Microscopic vs. Gross Observations

Fexinidazole

Study Number: 0504-2007

ANIMAL: 2785                      SEX: Female                      GROUP: 1                      DOSE LEVEL: vehicle  
DAY OF DEATH: 30 Test period                      STATUS: Scheduled phase sacrifice # 1                      TERMINAL BODY WEIGHT (g) : 212.4

| Tissue                  | Gross observations/comments     | Correlated Microscopic Observations                                                                |
|-------------------------|---------------------------------|----------------------------------------------------------------------------------------------------|
| GENER. CONDITION . . .  | GOOD                            | No micropathology observations on tissue.                                                          |
| HARDERIAN GLANDS . . .  | No gross observations on tissue | PORPHYRIN DEPOSITS, Minimal, Multifocal, Unilateral..                                              |
| LIVER . . . . .         | No gross observations on tissue | CHRONIC INFLAMMATION, Minimal, Multifocal.<br><br>HEPATOCELLULAR VACUOLATION, PERIPORTAL, Minimal. |
| MANDIBULAR L.N. . . . . | No gross observations on tissue | PLASMACYTOSIS, Slight, Diffuse.                                                                    |
| SPLEEN . . . . .        | No gross observations on tissue | EXTRAMEDULLARY HEMOPOIESIS, Minimal, Multifocal.                                                   |

The following tissues have no gross observations and were not examined microscopically:  
No tissue to list.

The following tissues have no gross observations and were marked as unremarkable microscopically:

|                  |                  |                 |                 |               |
|------------------|------------------|-----------------|-----------------|---------------|
| ADRENALS         | AORTA            | BONE MARROW     | BRAIN           | CECUM         |
| COLON            | DIAPHRAGM        | DUODENUM        | ESOPHAGUS       | EYES          |
| FEMUR            | HEART            | ILEUM           | JEJUNUM         | KIDNEYS       |
| MESENTERIC L.N.  | LUNG             | MAMMARY GLAND   | SKELETAL MUSCLE | SCIATIC NERVE |
| OPTIC NERVES     | OVARIES          | PANCREAS        | PITUITARY       | PARATHYROIDS  |
| SPINAL CORD CERV | SPINAL CORD THOR | MANDIBULAR S.G. | PAROTIDS        | STIFLE JOINT  |
| SKIN             | STOMACH          | STERNUM         | THYROIDS        | THYMUS        |
| TONGUE           | TRACHEA          | URINARY BLADDER | UTERUS          | VAGINA        |

CONFIDENTIAL

Appendix 10  
Individual Animal Microscopic vs. Gross Observations

Fexinidazole

Study Number: 0504-2007

---

|                              |                                       |                            |                     |
|------------------------------|---------------------------------------|----------------------------|---------------------|
| ANIMAL: 2786                 | SEX: Female                           | GROUP: 1                   | DOSE LEVEL: vehicle |
| DAY OF DEATH: 30 Test period | STATUS: Scheduled phase sacrifice # 1 | TERMINAL BODY WEIGHT (g) : | 243.2               |

---

| Tissue                  | Gross observations/comments     | Correlated Microscopic Observations                                                                  |
|-------------------------|---------------------------------|------------------------------------------------------------------------------------------------------|
| GENER. CONDITION . . .  | GOOD                            | No micropathology observations on tissue.                                                            |
| HEART . . . . .         | No gross observations on tissue | MYOCARDIAL INFLAMMATION, Minimal,<br>Multifocal, Chronic.                                            |
| HARDERIAN GLANDS . . .  | No gross observations on tissue | PORPHYRIN DEPOSITS, Minimal, Multifocal.                                                             |
| LIVER . . . . .         | No gross observations on tissue | CHRONIC INFLAMMATION, Minimal, Multifocal.<br><br>HEPATOCELLULAR VACUOLATION, PERIportal,<br>Slight. |
| MANDIBULAR L.N. . . . . | No gross observations on tissue | PLASMACYTOSIS, Slight, Diffuse,<br>Unilateral..                                                      |
| SKELETAL MUSCLE . . . . | No gross observations on tissue | CHRONIC INFLAMMATION, Minimal, Multifocal.                                                           |
| PANCREAS . . . . .      | No gross observations on tissue | CHRONIC INFLAMMATION, Minimal, Multifocal.                                                           |

The following tissues have no gross observations and were not examined microscopically:  
No tissue to list.

The following tissues have no gross observations and were marked as unremarkable microscopically:  
ADRENALS            AORTA            BONE MARROW            BRAIN            CECUM

CONFIDENTIAL

Appendix 10  
Individual Animal Microscopic vs. Gross Observations

Fexinidazole

Study Number: 0504-2007

---

|                              |                                       |                            |                     |
|------------------------------|---------------------------------------|----------------------------|---------------------|
| ANIMAL: 2786                 | SEX: Female                           | GROUP: 1                   | DOSE LEVEL: vehicle |
| DAY OF DEATH: 30 Test period | STATUS: Scheduled phase sacrifice # 1 | TERMINAL BODY WEIGHT (g) : | 243.2               |

---

| Tissue | Gross observations/comments | Correlated Microscopic Observations |
|--------|-----------------------------|-------------------------------------|
|--------|-----------------------------|-------------------------------------|

---

The following tissues have no gross observations and were marked as unremarkable microscopically:

|                 |               |                  |                  |                 |
|-----------------|---------------|------------------|------------------|-----------------|
| COLON           | DIAPHRAGM     | DUODENUM         | ESOPHAGUS        | EYES            |
| FEMUR           | ILEUM         | JEJUNUM          | KIDNEYS          | MESENTERIC L.N. |
| LUNG            | MAMMARY GLAND | SCIATIC NERVE    | OPTIC NERVES     | OVARIES         |
| PITUITARY       | PARATHYROIDS  | SPINAL CORD CERV | SPINAL CORD THOR | MANDIBULAR S.G. |
| PAROTIDS        | STIFLE JOINT  | SKIN             | SPLEEN           | STOMACH         |
| STERNUM         | THYROIDS      | THYMUS           | TONGUE           | TRACHEA         |
| URINARY BLADDER | UTERUS        | VAGINA           |                  |                 |

CONFIDENTIAL

Appendix 10  
Individual Animal Microscopic vs. Gross Observations

Fexinidazole

Study Number: 0504-2007

ANIMAL: 2787                      SEX: Female                      GROUP: 1                      DOSE LEVEL: vehicle  
DAY OF DEATH: 30 Test period                      STATUS: Scheduled phase sacrifice # 1                      TERMINAL BODY WEIGHT (g) : 219.6

| Tissue                  | Gross observations/comments     | Correlated Microscopic Observations                      |
|-------------------------|---------------------------------|----------------------------------------------------------|
| ADRENALS . . . . .      | No gross observations on tissue | CORTICAL VACUOLATION, Slight, Focal, Unilateral..        |
| GENER. CONDITION . . .  | GOOD                            | No micropathology observations on tissue.                |
| HARDERIAN GLANDS . . .  | No gross observations on tissue | PORPHYRIN DEPOSITS, Minimal, Multifocal.                 |
| LIVER . . . . .         | No gross observations on tissue | CHRONIC INFLAMMATION, Minimal, Multifocal.               |
| MANDIBULAR L.N. . . . . | No gross observations on tissue | PLASMACYTOSIS, Moderate, Diffuse.                        |
| PARATHYROIDS . . . . .  | No gross observations on tissue | ONLY ONE PARATHYROID AVAILABLE FOR EXAMINATION, Present. |

The following tissues have no gross observations and were not examined microscopically:  
No tissue to list.

The following tissues have no gross observations and were marked as unremarkable microscopically:

|                 |                 |                 |                  |                  |
|-----------------|-----------------|-----------------|------------------|------------------|
| AORTA           | BONE MARROW     | BRAIN           | CECUM            | COLON            |
| DIAPHRAGM       | DUODENUM        | ESOPHAGUS       | EYES             | FEMUR            |
| HEART           | ILEUM           | JEJUNUM         | KIDNEYS          | MESENTERIC L.N.  |
| LUNG            | MAMMARY GLAND   | SKELETAL MUSCLE | SCIATIC NERVE    | OPTIC NERVES     |
| OVARIES         | PANCREAS        | PITUITARY       | SPINAL CORD CERV | SPINAL CORD THOR |
| MANDIBULAR S.G. | PAROTIDS        | STIFLE JOINT    | SKIN             | SPLEEN           |
| STOMACH         | STERNUM         | THYROIDS        | THYMUS           | TONGUE           |
| TRACHEA         | URINARY BLADDER | UTERUS          | VAGINA           |                  |



CONFIDENTIAL

Appendix 10  
Individual Animal Microscopic vs. Gross Observations

Fexinidazole

Study Number: 0504-2007

ANIMAL: 2788                      SEX: Female                      GROUP: 1                      DOSE LEVEL: vehicle  
DAY OF DEATH: 30 Test period                      STATUS: Scheduled phase sacrifice # 1                      TERMINAL BODY WEIGHT (g) : 222.6

| Tissue                  | Gross observations/comments     | Correlated Microscopic Observations                                                              |
|-------------------------|---------------------------------|--------------------------------------------------------------------------------------------------|
| GENER. CONDITION . . .  | GOOD                            | No micropathology observations on tissue.                                                        |
| HARDERIAN GLANDS . . .  | No gross observations on tissue | PORPHYRIN DEPOSITS, Minimal, Multifocal.                                                         |
| LIVER . . . . .         | No gross observations on tissue | CHRONIC INFLAMMATION, Minimal, Multifocal.<br>HEPATOCELLULAR VACUOLATION, PERIPORTAL,<br>Slight. |
| MANDIBULAR L.N. . . . . | No gross observations on tissue | PLASMACYTOSIS, Moderate, Diffuse.                                                                |
| LUNG . . . . .          | No gross observations on tissue | ALVEOLAR MACROPHAGE INFILTRATION, Minimal,<br>Multifocal.                                        |
| OPTIC NERVES . . . . .  | No gross observations on tissue | ONLY ONE NERVE IS AVAILABLE FOR<br>EXAMINATION, Present.                                         |
| PARATHYROIDS . . . . .  | No gross observations on tissue | ONLY ONE PARATHYROID AVAILABLE FOR<br>EXAMINATION, Present.                                      |

The following tissues have no gross observations and were not examined microscopically:  
No tissue to list.

The following tissues have no gross observations and were marked as unremarkable microscopically:  
ADRENALS                      AORTA                      BONE MARROW                      BRAIN                      CECUM

CONFIDENTIAL

Appendix 10  
Individual Animal Microscopic vs. Gross Observations

Fexinidazole

Study Number: 0504-2007

---

|                              |                                       |                            |                     |
|------------------------------|---------------------------------------|----------------------------|---------------------|
| ANIMAL: 2788                 | SEX: Female                           | GROUP: 1                   | DOSE LEVEL: vehicle |
| DAY OF DEATH: 30 Test period | STATUS: Scheduled phase sacrifice # 1 | TERMINAL BODY WEIGHT (g) : | 222.6               |

---

| Tissue | Gross observations/comments | Correlated Microscopic Observations |
|--------|-----------------------------|-------------------------------------|
|--------|-----------------------------|-------------------------------------|

---

The following tissues have no gross observations and were marked as unremarkable microscopically:

|                 |               |                  |                  |                 |
|-----------------|---------------|------------------|------------------|-----------------|
| COLON           | DIAPHRAGM     | DUODENUM         | ESOPHAGUS        | EYES            |
| FEMUR           | HEART         | ILEUM            | JEJUNUM          | KIDNEYS         |
| MESENTERIC L.N. | MAMMARY GLAND | SKELETAL MUSCLE  | SCIATIC NERVE    | OVARIES         |
| PANCREAS        | PITUITARY     | SPINAL CORD CERV | SPINAL CORD THOR | MANDIBULAR S.G. |
| PAROTIDS        | STIFLE JOINT  | SKIN             | SPLEEN           | STOMACH         |
| STERNUM         | THYROIDS      | THYMUS           | TONGUE           | TRACHEA         |
| URINARY BLADDER | UTERUS        | VAGINA           |                  |                 |

CONFIDENTIAL

Appendix 10  
Individual Animal Microscopic vs. Gross Observations

Fexinidazole

Study Number: 0504-2007

ANIMAL: 2789                      SEX: Female                      GROUP: 1                      DOSE LEVEL: vehicle  
DAY OF DEATH: 30 Test period                      STATUS: Scheduled phase sacrifice # 1                      TERMINAL BODY WEIGHT (g) : 208.3

| Tissue                  | Gross observations/comments     | Correlated Microscopic Observations                                                                                                    |
|-------------------------|---------------------------------|----------------------------------------------------------------------------------------------------------------------------------------|
| GENER. CONDITION . . .  | GOOD                            | No micropathology observations on tissue.                                                                                              |
| KIDNEYS . . . . .       | No gross observations on tissue | CHRONIC INFLAMMATION, Minimal, Focal,<br>Unilateral left..<br><br>MEDULLARY TUBULAR DILATATION, Moderate,<br>Focal, Unilateral right.. |
| HARDERIAN GLANDS . . .  | No gross observations on tissue | PORPHYRIN DEPOSITS, Minimal, Multifocal.<br><br>LYMPHOCYTIC INFILTRATION, Minimal,<br>Multifocal.                                      |
| LIVER . . . . .         | No gross observations on tissue | CHRONIC INFLAMMATION, Minimal, Multifocal.                                                                                             |
| MANDIBULAR L.N. . . . . | No gross observations on tissue | PLASMACYTOSIS, Moderate, Diffuse,<br>Unilateral..                                                                                      |
| LUNG . . . . .          | No gross observations on tissue | ALVEOLAR MACROPHAGE INFILTRATION, Minimal,<br>Multifocal.                                                                              |
| OPTIC NERVES . . . . .  | No gross observations on tissue | ONLY ONE NERVE IS AVAILABLE FOR<br>EXAMINATION, Present.                                                                               |
| PARATHYROIDS . . . . .  | No gross observations on tissue | ONLY ONE PARATHYROID AVAILABLE FOR<br>EXAMINATION, Present.                                                                            |

CONFIDENTIAL

Appendix 10  
Individual Animal Microscopic vs. Gross Observations

Fexinidazole

Study Number: 0504-2007

---

|                              |                                       |                            |                     |
|------------------------------|---------------------------------------|----------------------------|---------------------|
| ANIMAL: 2789                 | SEX: Female                           | GROUP: 1                   | DOSE LEVEL: vehicle |
| DAY OF DEATH: 30 Test period | STATUS: Scheduled phase sacrifice # 1 | TERMINAL BODY WEIGHT (g) : | 208.3               |

---

| Tissue | Gross observations/comments | Correlated Microscopic Observations |
|--------|-----------------------------|-------------------------------------|
|--------|-----------------------------|-------------------------------------|

---

The following tissues have no gross observations and were not examined microscopically:  
No tissue to list.

The following tissues have no gross observations and were marked as unremarkable microscopically:

|               |                  |                  |                 |                 |
|---------------|------------------|------------------|-----------------|-----------------|
| ADRENALS      | AORTA            | BONE MARROW      | BRAIN           | CECUM           |
| COLON         | DIAPHRAGM        | DUODENUM         | ESOPHAGUS       | EYES            |
| FEMUR         | HEART            | ILEUM            | JEJUNUM         | MESENTERIC L.N. |
| MAMMARY GLAND | SKELETAL MUSCLE  | SCIATIC NERVE    | OVARIES         | PANCREAS        |
| PITUITARY     | SPINAL CORD CERV | SPINAL CORD THOR | MANDIBULAR S.G. | PAROTIDS        |
| STIFLE JOINT  | SKIN             | SPLEEN           | STOMACH         | STERNUM         |
| THYROIDS      | THYMUS           | TONGUE           | TRACHEA         | URINARY BLADDER |
| UTERUS        | VAGINA           |                  |                 |                 |

CONFIDENTIAL

Appendix 10  
Individual Animal Microscopic vs. Gross Observations

Fexinidazole

Study Number: 0504-2007

ANIMAL: 2790                      SEX: Female                      GROUP: 1                      DOSE LEVEL: vehicle  
DAY OF DEATH: 29 Test period                      STATUS: Scheduled phase sacrifice # 1                      TERMINAL BODY WEIGHT (g) : 224.5

Tissue                      Gross observations/comments                      Correlated Microscopic Observations

GENER. CONDITION . . .                      GOOD                      No micropathology observations on tissue.

HARDERIAN GLANDS . . . No gross observations on tissue                      PORPHYRIN DEPOSITS, Minimal, Multifocal.

LIVER . . . . . No gross observations on tissue                      CHRONIC INFLAMMATION, Minimal, Multifocal.  
HEPATOCELLULAR VACUOLATION, PERIPORTAL,  
Minimal.

MANDIBULAR L.N. . . . . No gross observations on tissue                      PLASMACYTOSIS, Slight, Diffuse.

PARATHYROIDS . . . . . No gross observations on tissue                      ONLY ONE PARATHYROID AVAILABLE FOR  
EXAMINATION, Present.

The following tissues have no gross observations and were not examined microscopically:  
No tissue to list.

The following tissues have no gross observations and were marked as unremarkable microscopically:

|                  |                 |                 |                 |                  |
|------------------|-----------------|-----------------|-----------------|------------------|
| ADRENALS         | AORTA           | BONE MARROW     | BRAIN           | CECUM            |
| COLON            | DIAPHRAGM       | DUODENUM        | ESOPHAGUS       | EYES             |
| FEMUR            | HEART           | ILEUM           | JEJUNUM         | KIDNEYS          |
| MESENTERIC L.N.  | LUNG            | MAMMARY GLAND   | SKELETAL MUSCLE | SCIATIC NERVE    |
| OPTIC NERVES     | OVARIES         | PANCREAS        | PITUITARY       | SPINAL CORD CERV |
| SPINAL CORD THOR | MANDIBULAR S.G. | PAROTIDS        | STIFLE JOINT    | SKIN             |
| SPLEEN           | STOMACH         | STERNUM         | THYROIDS        | THYMUS           |
| TONGUE           | TRACHEA         | URINARY BLADDER | UTERUS          | VAGINA           |

CONFIDENTIAL

Appendix 10  
Individual Animal Microscopic vs. Gross Observations

Fexinidazole

Study Number: 0504-2007

ANIMAL: 2791                      SEX: Female                      GROUP: 1                      DOSE LEVEL: vehicle  
DAY OF DEATH: 29 Test period                      STATUS: Scheduled phase sacrifice # 1                      TERMINAL BODY WEIGHT (g) : 207.6

| Tissue                  | Gross observations/comments     | Correlated Microscopic Observations                                                                  |
|-------------------------|---------------------------------|------------------------------------------------------------------------------------------------------|
| GENER. CONDITION . . .  | GOOD                            | No micropathology observations on tissue.                                                            |
| KIDNEYS . . . . .       | No gross observations on tissue | CHRONIC INFLAMMATION, Minimal, Focal,<br>Unilateral left..                                           |
| HARDERIAN GLANDS . . .  | No gross observations on tissue | PORPHYRIN DEPOSITS, Minimal, Multifocal.                                                             |
| LIVER . . . . .         | No gross observations on tissue | CHRONIC INFLAMMATION, Minimal, Multifocal.<br><br>HEPATOCELLULAR VACUOLATION, PERIportal,<br>Slight. |
| MANDIBULAR L.N. . . . . | No gross observations on tissue | PLASMACYTOSIS, Moderate, Diffuse.                                                                    |
| THYROIDS . . . . .      | No gross observations on tissue | ECTOPIC THYMUS, Present, Unilateral..                                                                |

The following tissues have no gross observations and were not examined microscopically:  
No tissue to list.

The following tissues have no gross observations and were marked as unremarkable microscopically:

|                  |                 |                 |               |                  |
|------------------|-----------------|-----------------|---------------|------------------|
| ADRENALS         | AORTA           | BONE MARROW     | BRAIN         | CECUM            |
| COLON            | DIAPHRAGM       | DUODENUM        | ESOPHAGUS     | EYES             |
| FEMUR            | HEART           | ILEUM           | JEJUNUM       | MESENTERIC L.N.  |
| LUNG             | MAMMARY GLAND   | SKELETAL MUSCLE | SCIATIC NERVE | OPTIC NERVES     |
| OVARIES          | PANCREAS        | PITUITARY       | PARATHYROIDS  | SPINAL CORD CERV |
| SPINAL CORD THOR | MANDIBULAR S.G. | PAROTIDS        | STIFLE JOINT  | SKIN             |
| SPLEEN           | STOMACH         | STERNUM         | THYMUS        | TONGUE           |
| TRACHEA          | URINARY BLADDER | UTERUS          | VAGINA        |                  |

CONFIDENTIAL

Appendix 10  
Individual Animal Microscopic vs. Gross Observations

Fexinidazole

Study Number: 0504-2007

ANIMAL: 2792                      SEX: Female                      GROUP: 1                      DOSE LEVEL: vehicle  
DAY OF DEATH: 29 Test period                      STATUS: Scheduled phase sacrifice # 1                      TERMINAL BODY WEIGHT (g) : 234.0

| Tissue                  | Gross observations/comments     | Correlated Microscopic Observations                                                               |
|-------------------------|---------------------------------|---------------------------------------------------------------------------------------------------|
| GENER. CONDITION . . .  | GOOD                            | No micropathology observations on tissue.                                                         |
| HARDERIAN GLANDS . . .  | No gross observations on tissue | PORPHYRIN DEPOSITS, Minimal, Multifocal, Unilateral..                                             |
| LIVER . . . . .         | No gross observations on tissue | CHRONIC INFLAMMATION, Minimal, Multifocal.<br><br>HEPATOCELLULAR VACUOLATION, PERIPORTAL, Slight. |
| MANDIBULAR L.N. . . . . | No gross observations on tissue | PLASMACYTOSIS, Moderate, Diffuse.                                                                 |
| LUNG . . . . .          | No gross observations on tissue | ALVEOLAR MACROPHAGE INFILTRATION, Minimal, Multifocal.                                            |

The following tissues have no gross observations and were not examined microscopically:  
No tissue to list.

The following tissues have no gross observations and were marked as unremarkable microscopically:

|                  |                 |                 |               |                  |
|------------------|-----------------|-----------------|---------------|------------------|
| ADRENALS         | AORTA           | BONE MARROW     | BRAIN         | CECUM            |
| COLON            | DIAPHRAGM       | DUODENUM        | ESOPHAGUS     | EYES             |
| FEMUR            | HEART           | ILEUM           | JEJUNUM       | KIDNEYS          |
| MESENTERIC L.N.  | MAMMARY GLAND   | SKELETAL MUSCLE | SCIATIC NERVE | OPTIC NERVES     |
| OVARIES          | PANCREAS        | PITUITARY       | PARATHYROIDS  | SPINAL CORD CERV |
| SPINAL CORD THOR | MANDIBULAR S.G. | PAROTIDS        | STIFLE JOINT  | SKIN             |
| SPLEEN           | STOMACH         | STERNUM         | THYROIDS      | THYMUS           |
| TONGUE           | TRACHEA         | URINARY BLADDER | UTERUS        | VAGINA           |

CONFIDENTIAL

Appendix 10  
Individual Animal Microscopic vs. Gross Observations

Fexinidazole

Study Number: 0504-2007

ANIMAL: 2793                      SEX: Female                      GROUP: 1                      DOSE LEVEL: vehicle  
DAY OF DEATH: 29 Test period                      STATUS: Scheduled phase sacrifice # 1                      TERMINAL BODY WEIGHT (g) : 217.3

| Tissue                  | Gross observations/comments     | Correlated Microscopic Observations                                                                |
|-------------------------|---------------------------------|----------------------------------------------------------------------------------------------------|
| GENER. CONDITION . . .  | GOOD                            | No micropathology observations on tissue.                                                          |
| LIVER . . . . .         | No gross observations on tissue | CHRONIC INFLAMMATION, Minimal, Multifocal.<br><br>HEPATOCELLULAR VACUOLATION, PERIPORTAL, Slight.  |
| MANDIBULAR L.N. . . . . | No gross observations on tissue | PLASMACYTOSIS, Moderate, Diffuse.                                                                  |
| LUNG . . . . .          | No gross observations on tissue | ALVEOLAR HEMORRHAGE, Minimal, Focal.<br><br>ALVEOLAR MACROPHAGE INFILTRATION, Minimal, Multifocal. |
| PARATHYROIDS . . . . .  | No gross observations on tissue | ONLY ONE PARATHYROID AVAILABLE FOR EXAMINATION, Present.                                           |

The following tissues have no gross observations and were not examined microscopically:  
No tissue to list.

The following tissues have no gross observations and were marked as unremarkable microscopically:

|                  |                 |                 |                 |                  |
|------------------|-----------------|-----------------|-----------------|------------------|
| ADRENALS         | AORTA           | BONE MARROW     | BRAIN           | CECUM            |
| COLON            | DIAPHRAGM       | DUODENUM        | ESOPHAGUS       | EYES             |
| FEMUR            | HEART           | ILEUM           | JEJUNUM         | KIDNEYS          |
| HARDERIAN GLANDS | MESENTERIC L.N. | MAMMARY GLAND   | SKELETAL MUSCLE | SCIATIC NERVE    |
| OPTIC NERVES     | OVARIES         | PANCREAS        | PITUITARY       | SPINAL CORD CERV |
| SPINAL CORD THOR | MANDIBULAR S.G. | PAROTIDS        | STIFLE JOINT    | SKIN             |
| SPLEEN           | STOMACH         | STERNUM         | THYROIDS        | THYMUS           |
| TONGUE           | TRACHEA         | URINARY BLADDER | UTERUS          | VAGINA           |



CONFIDENTIAL

Appendix 10  
Individual Animal Microscopic vs. Gross Observations

Fexinidazole

Study Number: 0504-2007

ANIMAL: 2794                      SEX: Female                      GROUP: 1                      DOSE LEVEL: vehicle  
DAY OF DEATH: 29 Test period                      STATUS: Scheduled phase sacrifice # 1                      TERMINAL BODY WEIGHT (g) : 238.5

| Tissue                  | Gross observations/comments     | Correlated Microscopic Observations                                                            |
|-------------------------|---------------------------------|------------------------------------------------------------------------------------------------|
| GENER. CONDITION . . .  | GOOD                            | No micropathology observations on tissue.                                                      |
| HARDERIAN GLANDS . . .  | No gross observations on tissue | PORPHYRIN DEPOSITS, Minimal, Multifocal.                                                       |
| LIVER . . . . .         | No gross observations on tissue | CHRONIC INFLAMMATION, Minimal, Multifocal.<br>HEPATOCELLULAR VACUOLATION, PERIPORTAL, Minimal. |
| MANDIBULAR L.N. . . . . | No gross observations on tissue | PLASMACYTOSIS, Moderate, Diffuse.                                                              |
| MAMMARY GLAND . . . . . | No gross observations on tissue | CERVICAL MAMMARY GLAND EXAMINED, Present.                                                      |
| OPTIC NERVES . . . . .  | No gross observations on tissue | ONLY ONE NERVE IS AVAILABLE FOR EXAMINATION, Present.                                          |
| PARATHYROIDS . . . . .  | No gross observations on tissue | ONLY ONE PARATHYROID AVAILABLE FOR EXAMINATION, Present.                                       |

The following tissues have no gross observations and were not examined microscopically:  
No tissue to list.

The following tissues have no gross observations and were marked as unremarkable microscopically:  
ADRENALS                      AORTA                      BONE MARROW                      BRAIN                      CECUM

CONFIDENTIAL

Appendix 10  
Individual Animal Microscopic vs. Gross Observations

Fexinidazole

Study Number: 0504-2007

---

|                              |                                       |                            |                     |
|------------------------------|---------------------------------------|----------------------------|---------------------|
| ANIMAL: 2794                 | SEX: Female                           | GROUP: 1                   | DOSE LEVEL: vehicle |
| DAY OF DEATH: 29 Test period | STATUS: Scheduled phase sacrifice # 1 | TERMINAL BODY WEIGHT (g) : | 238.5               |

---

| Tissue | Gross observations/comments | Correlated Microscopic Observations |
|--------|-----------------------------|-------------------------------------|
|--------|-----------------------------|-------------------------------------|

---

The following tissues have no gross observations and were marked as unremarkable microscopically:

|                 |              |                  |                  |                 |
|-----------------|--------------|------------------|------------------|-----------------|
| COLON           | DIAPHRAGM    | DUODENUM         | ESOPHAGUS        | EYES            |
| FEMUR           | HEART        | ILEUM            | JEJUNUM          | KIDNEYS         |
| MESENTERIC L.N. | LUNG         | SKELETAL MUSCLE  | SCIATIC NERVE    | OVARIES         |
| PANCREAS        | PITUITARY    | SPINAL CORD CERV | SPINAL CORD THOR | MANDIBULAR S.G. |
| PAROTIDS        | STIFLE JOINT | SKIN             | SPLEEN           | STOMACH         |
| STERNUM         | THYROIDS     | THYMUS           | TONGUE           | TRACHEA         |
| URINARY BLADDER | UTERUS       | VAGINA           |                  |                 |

CONFIDENTIAL

Appendix 10  
Individual Animal Microscopic vs. Gross Observations

Fexinidazole

Study Number: 0504-2007

|                              |                               |                            |                     |
|------------------------------|-------------------------------|----------------------------|---------------------|
| ANIMAL: 2795                 | SEX: Female                   | GROUP: 1                   | DOSE LEVEL: vehicle |
| DAY OF DEATH: 43 Test period | STATUS: Final phase sacrifice | TERMINAL BODY WEIGHT (g) : | 231.1               |

| Tissue                 | Gross observations/comments     | Correlated Microscopic Observations                                                               |
|------------------------|---------------------------------|---------------------------------------------------------------------------------------------------|
| GENER. CONDITION . . . | GOOD                            | No micropathology observations on tissue.                                                         |
| HARDERIAN GLANDS . . . | No gross observations on tissue | PORPHYRIN DEPOSITS, Slight, Multifocal.<br>HEMORRHAGE, UNILATERAL, Minimal, Multifocal.           |
| LIVER . . . . .        | No gross observations on tissue | CHRONIC INFLAMMATION, Minimal, Multifocal.<br>HEPATOCELLULAR VACUOLATION, PERIportal,<br>Minimal. |

The following tissues have no gross observations and were not examined microscopically:

|                 |                  |                  |                 |                 |
|-----------------|------------------|------------------|-----------------|-----------------|
| ADRENALS        | AORTA            | BONE MARROW      | BRAIN           | CECUM           |
| COLON           | DIAPHRAGM        | DUODENUM         | ESOPHAGUS       | EYES            |
| FEMUR           | HEART            | ILEUM            | JEJUNUM         | KIDNEYS         |
| MANDIBULAR L.N. | MESENTERIC L.N.  | LUNG             | MAMMARY GLAND   | SKELETAL MUSCLE |
| SCIATIC NERVE   | OPTIC NERVES     | OVARIES          | PANCREAS        | PITUITARY       |
| PARATHYROIDS    | SPINAL CORD CERV | SPINAL CORD THOR | MANDIBULAR S.G. | PAROTIDS        |
| STIFLE JOINT    | SKIN             | SPLEEN           | STOMACH         | STERNUM         |
| THYROIDS        | THYMUS           | TONGUE           | TRACHEA         | URINARY BLADDER |
| UTERUS          | VAGINA           |                  |                 |                 |

The following tissues have no gross observations and were marked as unremarkable microscopically:  
No tissue to list.

CONFIDENTIAL

Appendix 10  
Individual Animal Microscopic vs. Gross Observations

Fexinidazole

Study Number: 0504-2007

ANIMAL: 2796                      SEX: Female                      GROUP: 1                      DOSE LEVEL: vehicle  
DAY OF DEATH: 43 Test period                      STATUS: Final phase sacrifice                      TERMINAL BODY WEIGHT (g) : 233.1

| Tissue                 | Gross observations/comments     | Correlated Microscopic Observations                                                                                                                                                    |
|------------------------|---------------------------------|----------------------------------------------------------------------------------------------------------------------------------------------------------------------------------------|
| GENER. CONDITION . . . | GOOD                            | No micropathology observations on tissue.                                                                                                                                              |
| HARDERIAN GLANDS . . . | No gross observations on tissue | PORPHYRIN DEPOSITS, Minimal, Multifocal, Unilateral..                                                                                                                                  |
| LIVER . . . . .        | No gross observations on tissue | CHRONIC INFLAMMATION, Minimal, Multifocal.<br><br>HEPATOCELLULAR VACUOLATION, PERIPORTAL, Slight.<br><br>FOCAL NECROSIS, SUBCAPSULAR, Minimal. / with associated chronic inflammation. |

The following tissues have no gross observations and were not examined microscopically:

|                 |                  |                  |                 |                 |
|-----------------|------------------|------------------|-----------------|-----------------|
| ADRENALS        | AORTA            | BONE MARROW      | BRAIN           | CECUM           |
| COLON           | DIAPHRAGM        | DUODENUM         | ESOPHAGUS       | EYES            |
| FEMUR           | HEART            | ILEUM            | JEJUNUM         | KIDNEYS         |
| MANDIBULAR L.N. | MESENTERIC L.N.  | LUNG             | MAMMARY GLAND   | SKELETAL MUSCLE |
| SCIATIC NERVE   | OPTIC NERVES     | OVARIES          | PANCREAS        | PITUITARY       |
| PARATHYROIDS    | SPINAL CORD CERV | SPINAL CORD THOR | MANDIBULAR S.G. | PAROTIDS        |
| STIFLE JOINT    | SKIN             | SPLEEN           | STOMACH         | STERNUM         |
| THYROIDS        | THYMUS           | TONGUE           | TRACHEA         | URINARY BLADDER |
| UTERUS          | VAGINA           |                  |                 |                 |

The following tissues have no gross observations and were marked as unremarkable microscopically:  
No tissue to list.

CONFIDENTIAL

Appendix 10  
Individual Animal Microscopic vs. Gross Observations

Fexinidazole

Study Number: 0504-2007

ANIMAL: 2797                      SEX: Female                      GROUP: 1                      DOSE LEVEL: vehicle  
DAY OF DEATH: 43 Test period                      STATUS: Final phase sacrifice                      TERMINAL BODY WEIGHT (g) : 227.5

Tissue                      Gross observations/comments                      Correlated Microscopic Observations

GENER. CONDITION . . .                      GOOD                      No micropathology observations on tissue.

HARDERIAN GLANDS . . . No gross observations on tissue                      PORPHYRIN DEPOSITS, Minimal, Multifocal.  
HEMORRHAGE, UNILATERAL, Slight, Focal.  
LYMPHOCYTIC INFILTRATION, Minimal, Focal, Unilateral..

LIVER . . . . . No gross observations on tissue                      CHRONIC INFLAMMATION, Minimal, Multifocal.

STOMACH . . . . .                      DARK GLANDULAR MUCOSA/ one area, 1 mm in diameter.                      Examined 1 correlation found:  
EROSION OF GLANDULAR STOMACH, Minimal, Multifocal.

The following tissues have no gross observations and were not examined microscopically:

|                 |                  |                  |                 |                 |
|-----------------|------------------|------------------|-----------------|-----------------|
| ADRENALS        | AORTA            | BONE MARROW      | BRAIN           | CECUM           |
| COLON           | DIAPHRAGM        | DUODENUM         | ESOPHAGUS       | EYES            |
| FEMUR           | HEART            | ILEUM            | JEJUNUM         | KIDNEYS         |
| MANDIBULAR L.N. | MESENTERIC L.N.  | LUNG             | MAMMARY GLAND   | SKELETAL MUSCLE |
| SCIATIC NERVE   | OPTIC NERVES     | OVARIES          | PANCREAS        | PITUITARY       |
| PARATHYROIDS    | SPINAL CORD CERV | SPINAL CORD THOR | MANDIBULAR S.G. | PAROTIDS        |
| STIFLE JOINT    | SKIN             | SPLEEN           | STERNUM         | THYROIDS        |
| THYMUS          | TONGUE           | TRACHEA          | URINARY BLADDER | UTERUS          |
| VAGINA          |                  |                  |                 |                 |

The following tissues have no gross observations and were marked as unremarkable microscopically:  
No tissue to list.

CONFIDENTIAL

Appendix 10  
Individual Animal Microscopic vs. Gross Observations

Fexinidazole

Study Number: 0504-2007

ANIMAL: 2798                      SEX: Female                      GROUP: 1                      DOSE LEVEL: vehicle  
DAY OF DEATH: 43 Test period                      STATUS: Final phase sacrifice                      TERMINAL BODY WEIGHT (g) : 255.1

| Tissue                 | Gross observations/comments     | Correlated Microscopic Observations                                                                |
|------------------------|---------------------------------|----------------------------------------------------------------------------------------------------|
| GENER. CONDITION . . . | GOOD                            | No micropathology observations on tissue.                                                          |
| HARDERIAN GLANDS . . . | No gross observations on tissue | PORPHYRIN DEPOSITS, Minimal, Multifocal.                                                           |
| LIVER . . . . .        | No gross observations on tissue | CHRONIC INFLAMMATION, Minimal, Multifocal.<br><br>HEPATOCELLULAR VACUOLATION, PERIPORTAL, Minimal. |

The following tissues have no gross observations and were not examined microscopically:

|                 |                  |                  |                 |                 |
|-----------------|------------------|------------------|-----------------|-----------------|
| ADRENALS        | AORTA            | BONE MARROW      | BRAIN           | CECUM           |
| COLON           | DIAPHRAGM        | DUODENUM         | ESOPHAGUS       | EYES            |
| FEMUR           | HEART            | ILEUM            | JEJUNUM         | KIDNEYS         |
| MANDIBULAR L.N. | MESENTERIC L.N.  | LUNG             | MAMMARY GLAND   | SKELETAL MUSCLE |
| SCIATIC NERVE   | OPTIC NERVES     | OVARIES          | PANCREAS        | PITUITARY       |
| PARATHYROIDS    | SPINAL CORD CERV | SPINAL CORD THOR | MANDIBULAR S.G. | PAROTIDS        |
| STIFLE JOINT    | SKIN             | SPLEEN           | STOMACH         | STERNUM         |
| THYROIDS        | THYMUS           | TONGUE           | TRACHEA         | URINARY BLADDER |
| UTERUS          | VAGINA           |                  |                 |                 |

The following tissues have no gross observations and were marked as unremarkable microscopically:  
No tissue to list.

CONFIDENTIAL

Appendix 10  
Individual Animal Microscopic vs. Gross Observations

Fexinidazole

Study Number: 0504-2007

ANIMAL: 2799                      SEX: Female                      GROUP: 1                      DOSE LEVEL: vehicle  
DAY OF DEATH: 43 Test period                      STATUS: Final phase sacrifice                      TERMINAL BODY WEIGHT (g) : 250.3

| Tissue                 | Gross observations/comments     | Correlated Microscopic Observations                                                    |
|------------------------|---------------------------------|----------------------------------------------------------------------------------------|
| GENER. CONDITION . . . | GOOD                            | No micropathology observations on tissue.                                              |
| HARDERIAN GLANDS . . . | No gross observations on tissue | PORPHYRIN DEPOSITS, Slight, Multifocal.<br>HEMORRHAGE, UNILATERAL, Slight, Multifocal. |
| LIVER . . . . .        | No gross observations on tissue | CHRONIC INFLAMMATION, Minimal, Multifocal.                                             |

The following tissues have no gross observations and were not examined microscopically:

|                 |                  |                  |                 |                 |
|-----------------|------------------|------------------|-----------------|-----------------|
| ADRENALS        | AORTA            | BONE MARROW      | BRAIN           | CECUM           |
| COLON           | DIAPHRAGM        | DUODENUM         | ESOPHAGUS       | EYES            |
| FEMUR           | HEART            | ILEUM            | JEJUNUM         | KIDNEYS         |
| MANDIBULAR L.N. | MESENTERIC L.N.  | LUNG             | MAMMARY GLAND   | SKELETAL MUSCLE |
| SCIATIC NERVE   | OPTIC NERVES     | OVARIES          | PANCREAS        | PITUITARY       |
| PARATHYROIDS    | SPINAL CORD CERV | SPINAL CORD THOR | MANDIBULAR S.G. | PAROTIDS        |
| STIFLE JOINT    | SKIN             | SPLEEN           | STOMACH         | STERNUM         |
| THYROIDS        | THYMUS           | TONGUE           | TRACHEA         | URINARY BLADDER |
| UTERUS          | VAGINA           |                  |                 |                 |

The following tissues have no gross observations and were marked as unremarkable microscopically:  
No tissue to list.

CONFIDENTIAL

Appendix 10  
Individual Animal Microscopic vs. Gross Observations

Fexinidazole

Study Number: 0504-2007

ANIMAL: 2800                      SEX: Female                      GROUP: 2                      DOSE LEVEL: 50 mg/kg  
DAY OF DEATH: 30 Test period                      STATUS: Scheduled phase sacrifice # 1                      TERMINAL BODY WEIGHT (g) : 216.8

Tissue                      Gross observations/comments                      Correlated Microscopic Observations

GENER. CONDITION . . .                      GOOD                      No micropathology observations on tissue.

HARDERIAN GLANDS . . . No gross observations on tissue                      PORPHYRIN DEPOSITS, Minimal, Multifocal.  
LYMPHOCYTIC INFILTRATION, Minimal, Focal, Unilateral..

LIVER . . . . . No gross observations on tissue                      CHRONIC INFLAMMATION, Minimal, Multifocal.  
HEPATOCELLULAR HYPERTROPHY, CENTRIOLOBULAR, Minimal.  
HEPATOCELLULAR VACUOLATION, PERIPORTAL, Minimal.

The following tissues have no gross observations and were not examined microscopically:

- |                 |                  |                  |                 |                 |
|-----------------|------------------|------------------|-----------------|-----------------|
| ADRENALS        | AORTA            | BONE MARROW      | BRAIN           | CECUM           |
| COLON           | DIAPHRAGM        | DUODENUM         | ESOPHAGUS       | EYES            |
| FEMUR           | HEART            | ILEUM            | JEJUNUM         | KIDNEYS         |
| MANDIBULAR L.N. | MESENTERIC L.N.  | LUNG             | MAMMARY GLAND   | SKELETAL MUSCLE |
| SCIATIC NERVE   | OPTIC NERVES     | OVARIES          | PANCREAS        | PITUITARY       |
| PARATHYROIDS    | SPINAL CORD CERV | SPINAL CORD THOR | MANDIBULAR S.G. | PAROTIDS        |
| STIFLE JOINT    | SKIN             | SPLEEN           | STOMACH         | STERNUM         |
| THYROIDS        | THYMUS           | TONGUE           | TRACHEA         | URINARY BLADDER |
| UTERUS          | VAGINA           |                  |                 |                 |

The following tissues have no gross observations and were marked as unremarkable microscopically:  
No tissue to list.



CONFIDENTIAL

Appendix 10  
Individual Animal Microscopic vs. Gross Observations

Fexinidazole

Study Number: 0504-2007

ANIMAL: 2801                      SEX: Female                      GROUP: 2                      DOSE LEVEL: 50 mg/kg  
DAY OF DEATH: 30 Test period                      STATUS: Scheduled phase sacrifice # 1                      TERMINAL BODY WEIGHT (g) : 247.9

| Tissue                 | Gross observations/comments     | Correlated Microscopic Observations                                                                                                                            |
|------------------------|---------------------------------|----------------------------------------------------------------------------------------------------------------------------------------------------------------|
| GENER. CONDITION . . . | GOOD                            | No micropathology observations on tissue.                                                                                                                      |
| HARDERIAN GLANDS . . . | No gross observations on tissue | PORPHYRIN DEPOSITS, Slight, Multifocal.                                                                                                                        |
| LIVER . . . . .        | No gross observations on tissue | CHRONIC INFLAMMATION, Minimal, Multifocal.<br><br>HEPATOCELLULAR HYPERTROPHY, CENTRIOLOBULAR, Minimal.<br><br>HEPATOCELLULAR VACUOLATION, PERIPORTAL, Minimal. |

The following tissues have no gross observations and were not examined microscopically:

|                 |                  |                  |                 |                 |
|-----------------|------------------|------------------|-----------------|-----------------|
| ADRENALS        | AORTA            | BONE MARROW      | BRAIN           | CECUM           |
| COLON           | DIAPHRAGM        | DUODENUM         | ESOPHAGUS       | EYES            |
| FEMUR           | HEART            | ILEUM            | JEJUNUM         | KIDNEYS         |
| MANDIBULAR L.N. | MESENTERIC L.N.  | LUNG             | MAMMARY GLAND   | SKELETAL MUSCLE |
| SCIATIC NERVE   | OPTIC NERVES     | OVARIES          | PANCREAS        | PITUITARY       |
| PARATHYROIDS    | SPINAL CORD CERV | SPINAL CORD THOR | MANDIBULAR S.G. | PAROTIDS        |
| STIFLE JOINT    | SKIN             | SPLEEN           | STOMACH         | STERNUM         |
| THYROIDS        | THYMUS           | TONGUE           | TRACHEA         | URINARY BLADDER |
| UTERUS          | VAGINA           |                  |                 |                 |

The following tissues have no gross observations and were marked as unremarkable microscopically:  
No tissue to list.

CONFIDENTIAL

Appendix 10  
Individual Animal Microscopic vs. Gross Observations

Fexinidazole

Study Number: 0504-2007

ANIMAL: 2802                      SEX: Female                      GROUP: 2                      DOSE LEVEL: 50 mg/kg  
DAY OF DEATH: 30 Test period                      STATUS: Scheduled phase sacrifice # 1                      TERMINAL BODY WEIGHT (g) : 235.2

| Tissue                 | Gross observations/comments     | Correlated Microscopic Observations                                                                                                                            |
|------------------------|---------------------------------|----------------------------------------------------------------------------------------------------------------------------------------------------------------|
| GENER. CONDITION . . . | GOOD                            | No micropathology observations on tissue.                                                                                                                      |
| HARDERIAN GLANDS . . . | No gross observations on tissue | PORPHYRIN DEPOSITS, Moderate, Multifocal.                                                                                                                      |
| LIVER . . . . .        | No gross observations on tissue | CHRONIC INFLAMMATION, Minimal, Multifocal.<br><br>HEPATOCELLULAR HYPERTROPHY, CENTRIOLOBULAR, Minimal.<br><br>HEPATOCELLULAR VACUOLATION, PERIPORTAL, Minimal. |

The following tissues have no gross observations and were not examined microscopically:

|                 |                  |                  |                 |                 |
|-----------------|------------------|------------------|-----------------|-----------------|
| ADRENALS        | AORTA            | BONE MARROW      | BRAIN           | CECUM           |
| COLON           | DIAPHRAGM        | DUODENUM         | ESOPHAGUS       | EYES            |
| FEMUR           | HEART            | ILEUM            | JEJUNUM         | KIDNEYS         |
| MANDIBULAR L.N. | MESENTERIC L.N.  | LUNG             | MAMMARY GLAND   | SKELETAL MUSCLE |
| SCIATIC NERVE   | OPTIC NERVES     | OVARIES          | PANCREAS        | PITUITARY       |
| PARATHYROIDS    | SPINAL CORD CERV | SPINAL CORD THOR | MANDIBULAR S.G. | PAROTIDS        |
| STIFLE JOINT    | SKIN             | SPLEEN           | STOMACH         | STERNUM         |
| THYROIDS        | THYMUS           | TONGUE           | TRACHEA         | URINARY BLADDER |
| UTERUS          | VAGINA           |                  |                 |                 |

The following tissues have no gross observations and were marked as unremarkable microscopically:  
No tissue to list.

CONFIDENTIAL

Appendix 10  
Individual Animal Microscopic vs. Gross Observations

Fexinidazole

Study Number: 0504-2007

|                              |                                       |                            |                      |
|------------------------------|---------------------------------------|----------------------------|----------------------|
| ANIMAL: 2803                 | SEX: Female                           | GROUP: 2                   | DOSE LEVEL: 50 mg/kg |
| DAY OF DEATH: 30 Test period | STATUS: Scheduled phase sacrifice # 1 | TERMINAL BODY WEIGHT (g) : | 225.2                |

| Tissue                 | Gross observations/comments     | Correlated Microscopic Observations                                                                                                                            |
|------------------------|---------------------------------|----------------------------------------------------------------------------------------------------------------------------------------------------------------|
| GENER. CONDITION . . . | GOOD                            | No micropathology observations on tissue.                                                                                                                      |
| HARDERIAN GLANDS . . . | No gross observations on tissue | PORPHYRIN DEPOSITS, Slight, Multifocal.                                                                                                                        |
| LIVER . . . . .        | No gross observations on tissue | CHRONIC INFLAMMATION, Minimal, Multifocal.<br><br>HEPATOCELLULAR HYPERTROPHY, CENTRIOLOBULAR, Minimal.<br><br>HEPATOCELLULAR VACUOLATION, PERIPORTAL, Minimal. |

The following tissues have no gross observations and were not examined microscopically:

- |                 |                  |                  |                 |                 |
|-----------------|------------------|------------------|-----------------|-----------------|
| ADRENALS        | AORTA            | BONE MARROW      | BRAIN           | CECUM           |
| COLON           | DIAPHRAGM        | DUODENUM         | ESOPHAGUS       | EYES            |
| FEMUR           | HEART            | ILEUM            | JEJUNUM         | KIDNEYS         |
| MANDIBULAR L.N. | MESENTERIC L.N.  | LUNG             | MAMMARY GLAND   | SKELETAL MUSCLE |
| SCIATIC NERVE   | OPTIC NERVES     | OVARIES          | PANCREAS        | PITUITARY       |
| PARATHYROIDS    | SPINAL CORD CERV | SPINAL CORD THOR | MANDIBULAR S.G. | PAROTIDS        |
| STIFLE JOINT    | SKIN             | SPLEEN           | STOMACH         | STERNUM         |
| THYROIDS        | THYMUS           | TONGUE           | TRACHEA         | URINARY BLADDER |
| UTERUS          | VAGINA           |                  |                 |                 |

The following tissues have no gross observations and were marked as unremarkable microscopically:  
No tissue to list.

CONFIDENTIAL

Appendix 10  
Individual Animal Microscopic vs. Gross Observations

Fexinidazole

Study Number: 0504-2007

ANIMAL: 2804                      SEX: Female                      GROUP: 2                      DOSE LEVEL: 50 mg/kg  
DAY OF DEATH: 30 Test period                      STATUS: Scheduled phase sacrifice # 1                      TERMINAL BODY WEIGHT (g) : 209.9

| Tissue                 | Gross observations/comments     | Correlated Microscopic Observations                                                               |
|------------------------|---------------------------------|---------------------------------------------------------------------------------------------------|
| GENER. CONDITION . . . | GOOD                            | No micropathology observations on tissue.                                                         |
| HARDERIAN GLANDS . . . | No gross observations on tissue | PORPHYRIN DEPOSITS, Slight, Multifocal.                                                           |
| LIVER . . . . .        | No gross observations on tissue | CHRONIC INFLAMMATION, Minimal, Multifocal.<br><br>HEPATOCELLULAR VACUOLATION, PERIPORTAL, Slight. |

The following tissues have no gross observations and were not examined microscopically:

|                 |                  |                  |                 |                 |
|-----------------|------------------|------------------|-----------------|-----------------|
| ADRENALS        | AORTA            | BONE MARROW      | BRAIN           | CECUM           |
| COLON           | DIAPHRAGM        | DUODENUM         | ESOPHAGUS       | EYES            |
| FEMUR           | HEART            | ILEUM            | JEJUNUM         | KIDNEYS         |
| MANDIBULAR L.N. | MESENTERIC L.N.  | LUNG             | MAMMARY GLAND   | SKELETAL MUSCLE |
| SCIATIC NERVE   | OPTIC NERVES     | OVARIES          | PANCREAS        | PITUITARY       |
| PARATHYROIDS    | SPINAL CORD CERV | SPINAL CORD THOR | MANDIBULAR S.G. | PAROTIDS        |
| STIFLE JOINT    | SKIN             | SPLEEN           | STOMACH         | STERNUM         |
| THYROIDS        | THYMUS           | TONGUE           | TRACHEA         | URINARY BLADDER |
| UTERUS          | VAGINA           |                  |                 |                 |

The following tissues have no gross observations and were marked as unremarkable microscopically:  
No tissue to list.

CONFIDENTIAL

Appendix 10  
Individual Animal Microscopic vs. Gross Observations

Fexinidazole

Study Number: 0504-2007

ANIMAL: 2805                      SEX: Female                      GROUP: 2                      DOSE LEVEL: 50 mg/kg  
DAY OF DEATH: 29 Test period                      STATUS: Scheduled phase sacrifice # 1                      TERMINAL BODY WEIGHT (g) : 233.0

| Tissue                 | Gross observations/comments     | Correlated Microscopic Observations                                                                                                                  |
|------------------------|---------------------------------|------------------------------------------------------------------------------------------------------------------------------------------------------|
| GENER. CONDITION . . . | GOOD                            | No micropathology observations on tissue.                                                                                                            |
| HARDERIAN GLANDS . . . | No gross observations on tissue | PORPHYRIN DEPOSITS, Slight, Multifocal.<br>HEMORRHAGE, UNILATERAL, Slight, Multifocal.<br>LYMPHOCYTIC INFILTRATION, Minimal, Focal, Unilateral..     |
| LIVER . . . . .        | No gross observations on tissue | CHRONIC INFLAMMATION, Minimal, Multifocal.<br>HEPATOCELLULAR HYPERTROPHY, CENTRIOBULAR, Minimal.<br>HEPATOCELLULAR VACUOLATION, PERIPORTAL, Minimal. |

The following tissues have no gross observations and were not examined microscopically:

|                 |                  |                  |                 |                 |
|-----------------|------------------|------------------|-----------------|-----------------|
| ADRENALS        | AORTA            | BONE MARROW      | BRAIN           | CECUM           |
| COLON           | DIAPHRAGM        | DUODENUM         | ESOPHAGUS       | EYES            |
| FEMUR           | HEART            | ILEUM            | JEJUNUM         | KIDNEYS         |
| MANDIBULAR L.N. | MESENTERIC L.N.  | LUNG             | MAMMARY GLAND   | SKELETAL MUSCLE |
| SCIATIC NERVE   | OPTIC NERVES     | OVARIES          | PANCREAS        | PITUITARY       |
| PARATHYROIDS    | SPINAL CORD CERV | SPINAL CORD THOR | MANDIBULAR S.G. | PAROTIDS        |
| STIFLE JOINT    | SKIN             | SPLEEN           | STOMACH         | STERNUM         |
| THYROIDS        | THYMUS           | TONGUE           | TRACHEA         | URINARY BLADDER |
| UTERUS          | VAGINA           |                  |                 |                 |

The following tissues have no gross observations and were marked as unremarkable microscopically:  
No tissue to list.

CONFIDENTIAL

Appendix 10  
Individual Animal Microscopic vs. Gross Observations

Fexinidazole

Study Number: 0504-2007

ANIMAL: 2806                      SEX: Female                      GROUP: 2                      DOSE LEVEL: 50 mg/kg  
DAY OF DEATH: 29 Test period                      STATUS: Scheduled phase sacrifice # 1                      TERMINAL BODY WEIGHT (g) : 220.3

Tissue                      Gross observations/comments                      Correlated Microscopic Observations

GENER. CONDITION . . .                      GOOD                      No micropathology observations on tissue.

HARDERIAN GLANDS . . . No gross observations on tissue                      PORPHYRIN DEPOSITS, Minimal, Multifocal.  
HEMORRHAGE, UNILATERAL, Slight, Multifocal.  
ADENITIS, UNILATERAL, Slight, Multifocal, Acute.

LIVER . . . . . No gross observations on tissue                      CHRONIC INFLAMMATION, Minimal, Multifocal.  
HEPATOCELLULAR HYPERTROPHY, CENTRIOBULAR, Minimal.  
HEPATOCELLULAR VACUOLATION, PERIPORTAL, Minimal.

The following tissues have no gross observations and were not examined microscopically:

|                 |                  |                  |                 |                 |
|-----------------|------------------|------------------|-----------------|-----------------|
| ADRENALS        | AORTA            | BONE MARROW      | BRAIN           | CECUM           |
| COLON           | DIAPHRAGM        | DUODENUM         | ESOPHAGUS       | EYES            |
| FEMUR           | HEART            | ILEUM            | JEJUNUM         | KIDNEYS         |
| MANDIBULAR L.N. | MESENTERIC L.N.  | LUNG             | MAMMARY GLAND   | SKELETAL MUSCLE |
| SCIATIC NERVE   | OPTIC NERVES     | OVARIES          | PANCREAS        | PITUITARY       |
| PARATHYROIDS    | SPINAL CORD CERV | SPINAL CORD THOR | MANDIBULAR S.G. | PAROTIDS        |
| STIFLE JOINT    | SKIN             | SPLEEN           | STOMACH         | STERNUM         |
| THYROIDS        | THYMUS           | TONGUE           | TRACHEA         | URINARY BLADDER |
| UTERUS          | VAGINA           |                  |                 |                 |

The following tissues have no gross observations and were marked as unremarkable microscopically:  
No tissue to list.

CONFIDENTIAL

Appendix 10  
Individual Animal Microscopic vs. Gross Observations

Fexinidazole

Study Number: 0504-2007

ANIMAL: 2807                      SEX: Female                      GROUP: 2                      DOSE LEVEL: 50 mg/kg  
DAY OF DEATH: 29 Test period                      STATUS: Scheduled phase sacrifice # 1                      TERMINAL BODY WEIGHT (g) : 220.5

| Tissue                 | Gross observations/comments     | Correlated Microscopic Observations                                                                  |
|------------------------|---------------------------------|------------------------------------------------------------------------------------------------------|
| GENER. CONDITION . . . | GOOD                            | No micropathology observations on tissue.                                                            |
| HARDERIAN GLANDS . . . | No gross observations on tissue | PORPHYRIN DEPOSITS, Slight, Multifocal.                                                              |
| LIVER . . . . .        | No gross observations on tissue | CHRONIC INFLAMMATION, Minimal, Multifocal.<br><br>HEPATOCELLULAR VACUOLATION, PERIportal,<br>Slight. |

The following tissues have no gross observations and were not examined microscopically:

|                 |                  |                  |                 |                 |
|-----------------|------------------|------------------|-----------------|-----------------|
| ADRENALS        | AORTA            | BONE MARROW      | BRAIN           | CECUM           |
| COLON           | DIAPHRAGM        | DUODENUM         | ESOPHAGUS       | EYES            |
| FEMUR           | HEART            | ILEUM            | JEJUNUM         | KIDNEYS         |
| MANDIBULAR L.N. | MESENTERIC L.N.  | LUNG             | MAMMARY GLAND   | SKELETAL MUSCLE |
| SCIATIC NERVE   | OPTIC NERVES     | OVARIES          | PANCREAS        | PITUITARY       |
| PARATHYROIDS    | SPINAL CORD CERV | SPINAL CORD THOR | MANDIBULAR S.G. | PAROTIDS        |
| STIFLE JOINT    | SKIN             | SPLEEN           | STOMACH         | STERNUM         |
| THYROIDS        | THYMUS           | TONGUE           | TRACHEA         | URINARY BLADDER |
| UTERUS          | VAGINA           |                  |                 |                 |

The following tissues have no gross observations and were marked as unremarkable microscopically:  
No tissue to list.

CONFIDENTIAL

Appendix 10  
Individual Animal Microscopic vs. Gross Observations

Fexinidazole

Study Number: 0504-2007

---

|                              |                                       |                            |                      |
|------------------------------|---------------------------------------|----------------------------|----------------------|
| ANIMAL: 2808                 | SEX: Female                           | GROUP: 2                   | DOSE LEVEL: 50 mg/kg |
| DAY OF DEATH: 29 Test period | STATUS: Scheduled phase sacrifice # 1 | TERMINAL BODY WEIGHT (g) : | 230.6                |

---

| Tissue | Gross observations/comments | Correlated Microscopic Observations |
|--------|-----------------------------|-------------------------------------|
|--------|-----------------------------|-------------------------------------|

---

|                        |      |                                           |
|------------------------|------|-------------------------------------------|
| GENER. CONDITION . . . | GOOD | No micropathology observations on tissue. |
|------------------------|------|-------------------------------------------|

|                        |                                 |                                                                                                                                         |
|------------------------|---------------------------------|-----------------------------------------------------------------------------------------------------------------------------------------|
| HARDERIAN GLANDS . . . | No gross observations on tissue | PORPHYRIN DEPOSITS, Moderate, Multifocal.<br>HEMORRHAGE, UNILATERAL, Slight, Multifocal.<br>ADENITIS, UNILATERAL, Slight, Focal, Acute. |
|------------------------|---------------------------------|-----------------------------------------------------------------------------------------------------------------------------------------|

|                 |                                 |                                                                                                                                                     |
|-----------------|---------------------------------|-----------------------------------------------------------------------------------------------------------------------------------------------------|
| LIVER . . . . . | No gross observations on tissue | CHRONIC INFLAMMATION, Minimal, Multifocal.<br>HEPATOCELLULAR HYPERTROPHY, CENTRIOBULAR, Minimal.<br>HEPATOCELLULAR VACUOLATION, PERIPORTAL, Slight. |
|-----------------|---------------------------------|-----------------------------------------------------------------------------------------------------------------------------------------------------|

The following tissues have no gross observations and were not examined microscopically:

|                 |                  |                  |                 |                 |
|-----------------|------------------|------------------|-----------------|-----------------|
| ADRENALS        | AORTA            | BONE MARROW      | BRAIN           | CECUM           |
| COLON           | DIAPHRAGM        | DUODENUM         | ESOPHAGUS       | EYES            |
| FEMUR           | HEART            | ILEUM            | JEJUNUM         | KIDNEYS         |
| MANDIBULAR L.N. | MESENTERIC L.N.  | LUNG             | MAMMARY GLAND   | SKELETAL MUSCLE |
| SCIATIC NERVE   | OPTIC NERVES     | OVARIES          | PANCREAS        | PITUITARY       |
| PARATHYROIDS    | SPINAL CORD CERV | SPINAL CORD THOR | MANDIBULAR S.G. | PAROTIDS        |
| STIFLE JOINT    | SKIN             | SPLEEN           | STOMACH         | STERNUM         |
| THYROIDS        | THYMUS           | TONGUE           | TRACHEA         | URINARY BLADDER |
| UTERUS          | VAGINA           |                  |                 |                 |

The following tissues have no gross observations and were marked as unremarkable microscopically:  
No tissue to list.



CONFIDENTIAL

Appendix 10  
Individual Animal Microscopic vs. Gross Observations

Fexinidazole

Study Number: 0504-2007

ANIMAL: 2809                      SEX: Female                      GROUP: 2                      DOSE LEVEL: 50 mg/kg  
DAY OF DEATH: 29 Test period                      STATUS: Scheduled phase sacrifice # 1                      TERMINAL BODY WEIGHT (g) : 238.7

| Tissue                 | Gross observations/comments     | Correlated Microscopic Observations                                                                                                     |
|------------------------|---------------------------------|-----------------------------------------------------------------------------------------------------------------------------------------|
| GENER. CONDITION . . . | GOOD                            | No micropathology observations on tissue.                                                                                               |
| HARDERIAN GLANDS . . . | No gross observations on tissue | PORPHYRIN DEPOSITS, Slight, Multifocal.<br>HEMORRHAGE, UNILATERAL, Slight, Multifocal.<br>ADENITIS, UNILATERAL, Moderate, Focal, Acute. |
| LIVER . . . . .        | No gross observations on tissue | CHRONIC INFLAMMATION, Minimal, Multifocal.<br>HEPATOCELLULAR VACUOLATION, PERIportal, Minimal.                                          |

The following tissues have no gross observations and were not examined microscopically:

- |                 |                  |                  |                 |                 |
|-----------------|------------------|------------------|-----------------|-----------------|
| ADRENALS        | AORTA            | BONE MARROW      | BRAIN           | CECUM           |
| COLON           | DIAPHRAGM        | DUODENUM         | ESOPHAGUS       | EYES            |
| FEMUR           | HEART            | ILEUM            | JEJUNUM         | KIDNEYS         |
| MANDIBULAR L.N. | MESENTERIC L.N.  | LUNG             | MAMMARY GLAND   | SKELETAL MUSCLE |
| SCIATIC NERVE   | OPTIC NERVES     | OVARIES          | PANCREAS        | PITUITARY       |
| PARATHYROIDS    | SPINAL CORD CERV | SPINAL CORD THOR | MANDIBULAR S.G. | PAROTIDS        |
| STIFLE JOINT    | SKIN             | SPLEEN           | STOMACH         | STERNUM         |
| THYROIDS        | THYMUS           | TONGUE           | TRACHEA         | URINARY BLADDER |
| UTERUS          | VAGINA           |                  |                 |                 |

The following tissues have no gross observations and were marked as unremarkable microscopically:  
No tissue to list.

CONFIDENTIAL

Appendix 10  
Individual Animal Microscopic vs. Gross Observations

Fexinidazole

Study Number: 0504-2007

ANIMAL: 2810                      SEX: Female                      GROUP: 3                      DOSE LEVEL: 200 mg/kg  
DAY OF DEATH: 30 Test period                      STATUS: Scheduled phase sacrifice # 1                      TERMINAL BODY WEIGHT (g) : 218.2

| Tissue                 | Gross observations/comments     | Correlated Microscopic Observations                                                                                                                            |
|------------------------|---------------------------------|----------------------------------------------------------------------------------------------------------------------------------------------------------------|
| GENER. CONDITION . . . | GOOD                            | No micropathology observations on tissue.                                                                                                                      |
| HARDERIAN GLANDS . . . | No gross observations on tissue | PORPHYRIN DEPOSITS, Moderate, Multifocal.                                                                                                                      |
| LIVER . . . . .        | No gross observations on tissue | CHRONIC INFLAMMATION, Minimal, Multifocal.<br><br>HEPATOCELLULAR HYPERTROPHY, CENTRIOLOBULAR, Minimal.<br><br>HEPATOCELLULAR VACUOLATION, PERIPORTAL, Minimal. |

The following tissues have no gross observations and were not examined microscopically:

|                 |                  |                  |                 |                 |
|-----------------|------------------|------------------|-----------------|-----------------|
| ADRENALS        | AORTA            | BONE MARROW      | BRAIN           | CECUM           |
| COLON           | DIAPHRAGM        | DUODENUM         | ESOPHAGUS       | EYES            |
| FEMUR           | HEART            | ILEUM            | JEJUNUM         | KIDNEYS         |
| MANDIBULAR L.N. | MESENTERIC L.N.  | LUNG             | MAMMARY GLAND   | SKELETAL MUSCLE |
| SCIATIC NERVE   | OPTIC NERVES     | OVARIES          | PANCREAS        | PITUITARY       |
| PARATHYROIDS    | SPINAL CORD CERV | SPINAL CORD THOR | MANDIBULAR S.G. | PAROTIDS        |
| STIFLE JOINT    | SKIN             | SPLEEN           | STOMACH         | STERNUM         |
| THYROIDS        | THYMUS           | TONGUE           | TRACHEA         | URINARY BLADDER |
| UTERUS          | VAGINA           |                  |                 |                 |

The following tissues have no gross observations and were marked as unremarkable microscopically:  
No tissue to list.

CONFIDENTIAL

Appendix 10  
Individual Animal Microscopic vs. Gross Observations

Fexinidazole

Study Number: 0504-2007

ANIMAL: 2811                      SEX: Female                      GROUP: 3                      DOSE LEVEL: 200 mg/kg  
DAY OF DEATH: 30 Test period                      STATUS: Scheduled phase sacrifice # 1                      TERMINAL BODY WEIGHT (g) : 237.9

| Tissue                 | Gross observations/comments      | Correlated Microscopic Observations                                                                                                                           |
|------------------------|----------------------------------|---------------------------------------------------------------------------------------------------------------------------------------------------------------|
| GENER. CONDITION . . . | GOOD                             | No micropathology observations on tissue.                                                                                                                     |
| HARDERIAN GLANDS . . . | No gross observations on tissue  | PORPHYRIN DEPOSITS, Slight, Multifocal.                                                                                                                       |
| LIVER . . . . .        | No gross observations on tissue  | CHRONIC INFLAMMATION, Minimal, Multifocal.<br><br>HEPATOCELLULAR HYPERTROPHY, CENTRIOLOBULAR, Minimal.<br><br>HEPATOCELLULAR VACUOLATION, PERIPORTAL, Slight. |
| PLEURAL CAVITY . . . . | ABNORMAL CONTENTS/ clear liquid. | No micropathology observations on tissue.                                                                                                                     |

The following tissues have no gross observations and were not examined microscopically:

- |                 |                  |                  |                 |                 |
|-----------------|------------------|------------------|-----------------|-----------------|
| ADRENALS        | AORTA            | BONE MARROW      | BRAIN           | CECUM           |
| COLON           | DIAPHRAGM        | DUODENUM         | ESOPHAGUS       | EYES            |
| FEMUR           | HEART            | ILEUM            | JEJUNUM         | KIDNEYS         |
| MANDIBULAR L.N. | MESENTERIC L.N.  | LUNG             | MAMMARY GLAND   | SKELETAL MUSCLE |
| SCIATIC NERVE   | OPTIC NERVES     | OVARIES          | PANCREAS        | PITUITARY       |
| PARATHYROIDS    | SPINAL CORD CERV | SPINAL CORD THOR | MANDIBULAR S.G. | PAROTIDS        |
| STIFLE JOINT    | SKIN             | SPLEEN           | STOMACH         | STERNUM         |
| THYROIDS        | THYMUS           | TONGUE           | TRACHEA         | URINARY BLADDER |
| UTERUS          | VAGINA           |                  |                 |                 |

The following tissues have no gross observations and were marked as unremarkable microscopically:  
No tissue to list.

CONFIDENTIAL

Appendix 10  
Individual Animal Microscopic vs. Gross Observations

Fexinidazole

Study Number: 0504-2007

|                              |                                       |                            |                       |
|------------------------------|---------------------------------------|----------------------------|-----------------------|
| ANIMAL: 2812                 | SEX: Female                           | GROUP: 3                   | DOSE LEVEL: 200 mg/kg |
| DAY OF DEATH: 30 Test period | STATUS: Scheduled phase sacrifice # 1 | TERMINAL BODY WEIGHT (g) : | 235.2                 |

| Tissue                 | Gross observations/comments     | Correlated Microscopic Observations                                                                   |
|------------------------|---------------------------------|-------------------------------------------------------------------------------------------------------|
| GENER. CONDITION . . . | GOOD                            | No micropathology observations on tissue.                                                             |
| HARDERIAN GLANDS . . . | No gross observations on tissue | PORPHYRIN DEPOSITS, Slight, Multifocal.                                                               |
| LIVER . . . . .        | No gross observations on tissue | CHRONIC INFLAMMATION, Minimal, Multifocal.<br>HEPATOCELLULAR HYPERTROPHY, CENTRIOLOBULAR,<br>Minimal. |

The following tissues have no gross observations and were not examined microscopically:

- |                 |                  |                  |                 |                 |
|-----------------|------------------|------------------|-----------------|-----------------|
| ADRENALS        | AORTA            | BONE MARROW      | BRAIN           | CECUM           |
| COLON           | DIAPHRAGM        | DUODENUM         | ESOPHAGUS       | EYES            |
| FEMUR           | HEART            | ILEUM            | JEJUNUM         | KIDNEYS         |
| MANDIBULAR L.N. | MESENTERIC L.N.  | LUNG             | MAMMARY GLAND   | SKELETAL MUSCLE |
| SCIATIC NERVE   | OPTIC NERVES     | OVARIES          | PANCREAS        | PITUITARY       |
| PARATHYROIDS    | SPINAL CORD CERV | SPINAL CORD THOR | MANDIBULAR S.G. | PAROTIDS        |
| STIFLE JOINT    | SKIN             | SPLEEN           | STOMACH         | STERNUM         |
| THYROIDS        | THYMUS           | TONGUE           | TRACHEA         | URINARY BLADDER |
| UTERUS          | VAGINA           |                  |                 |                 |

The following tissues have no gross observations and were marked as unremarkable microscopically:  
No tissue to list.



CONFIDENTIAL

Appendix 10  
Individual Animal Microscopic vs. Gross Observations

Fexinidazole

Study Number: 0504-2007

|                              |                                       |                            |                       |
|------------------------------|---------------------------------------|----------------------------|-----------------------|
| ANIMAL: 2814                 | SEX: Female                           | GROUP: 3                   | DOSE LEVEL: 200 mg/kg |
| DAY OF DEATH: 30 Test period | STATUS: Scheduled phase sacrifice # 1 | TERMINAL BODY WEIGHT (g) : | 213.0                 |

| Tissue                 | Gross observations/comments                                     | Correlated Microscopic Observations                                                                                                                            |
|------------------------|-----------------------------------------------------------------|----------------------------------------------------------------------------------------------------------------------------------------------------------------|
| GENER. CONDITION . . . | GOOD                                                            | No micropathology observations on tissue.                                                                                                                      |
| HARDERIAN GLANDS . . . | No gross observations on tissue                                 | PORPHYRIN DEPOSITS, Slight, Multifocal.                                                                                                                        |
| LIVER . . . . .        | No gross observations on tissue                                 | CHRONIC INFLAMMATION, Minimal, Multifocal.<br><br>HEPATOCELLULAR HYPERTROPHY, CENTRIOLOBULAR, Minimal.<br><br>HEPATOCELLULAR VACUOLATION, PERIPORTAL, Minimal. |
| SKIN . . . . .         | ENCRUSTED AREA(S), single/ in the left cheek, 3 mm in diameter. | Tissue is unremarkable.                                                                                                                                        |

The following tissues have no gross observations and were not examined microscopically:

|                 |                  |                  |                 |                 |
|-----------------|------------------|------------------|-----------------|-----------------|
| ADRENALS        | AORTA            | BONE MARROW      | BRAIN           | CECUM           |
| COLON           | DIAPHRAGM        | DUODENUM         | ESOPHAGUS       | EYES            |
| FEMUR           | HEART            | ILEUM            | JEJUNUM         | KIDNEYS         |
| MANDIBULAR L.N. | MESENTERIC L.N.  | LUNG             | MAMMARY GLAND   | SKELETAL MUSCLE |
| SCIATIC NERVE   | OPTIC NERVES     | OVARIES          | PANCREAS        | PITUITARY       |
| PARATHYROIDS    | SPINAL CORD CERV | SPINAL CORD THOR | MANDIBULAR S.G. | PAROTIDS        |
| STIFLE JOINT    | SPLEEN           | STOMACH          | STERNUM         | THYROIDS        |
| THYMUS          | TONGUE           | TRACHEA          | URINARY BLADDER | UTERUS          |
| VAGINA          |                  |                  |                 |                 |

The following tissues have no gross observations and were marked as unremarkable microscopically:  
No tissue to list.

CONFIDENTIAL

Appendix 10  
Individual Animal Microscopic vs. Gross Observations

Fexinidazole

Study Number: 0504-2007

|                              |                                       |                            |                       |
|------------------------------|---------------------------------------|----------------------------|-----------------------|
| ANIMAL: 2815                 | SEX: Female                           | GROUP: 3                   | DOSE LEVEL: 200 mg/kg |
| DAY OF DEATH: 29 Test period | STATUS: Scheduled phase sacrifice # 1 | TERMINAL BODY WEIGHT (g) : | 219.2                 |

| Tissue                 | Gross observations/comments     | Correlated Microscopic Observations                                                                                                                  |
|------------------------|---------------------------------|------------------------------------------------------------------------------------------------------------------------------------------------------|
| GENER. CONDITION . . . | GOOD                            | No micropathology observations on tissue.                                                                                                            |
| HARDERIAN GLANDS . . . | No gross observations on tissue | PORPHYRIN DEPOSITS, Moderate, Multifocal.<br>HEMORRHAGE, UNILATERAL, Slight, Focal.                                                                  |
| LIVER . . . . .        | No gross observations on tissue | CHRONIC INFLAMMATION, Minimal, Multifocal.<br>HEPATOCELLULAR HYPERTROPHY, CENTRIOLOBULAR, Slight.<br>HEPATOCELLULAR VACUOLATION, PERIportal, Slight. |

The following tissues have no gross observations and were not examined microscopically:

|                 |                  |                  |                 |                 |
|-----------------|------------------|------------------|-----------------|-----------------|
| ADRENALS        | AORTA            | BONE MARROW      | BRAIN           | CECUM           |
| COLON           | DIAPHRAGM        | DUODENUM         | ESOPHAGUS       | EYES            |
| FEMUR           | HEART            | ILEUM            | JEJUNUM         | KIDNEYS         |
| MANDIBULAR L.N. | MESENTERIC L.N.  | LUNG             | MAMMARY GLAND   | SKELETAL MUSCLE |
| SCIATIC NERVE   | OPTIC NERVES     | OVARIES          | PANCREAS        | PITUITARY       |
| PARATHYROIDS    | SPINAL CORD CERV | SPINAL CORD THOR | MANDIBULAR S.G. | PAROTIDS        |
| STIFLE JOINT    | SKIN             | SPLEEN           | STOMACH         | STERNUM         |
| THYROIDS        | THYMUS           | TONGUE           | TRACHEA         | URINARY BLADDER |
| UTERUS          | VAGINA           |                  |                 |                 |

The following tissues have no gross observations and were marked as unremarkable microscopically:  
No tissue to list.

CONFIDENTIAL

Appendix 10  
Individual Animal Microscopic vs. Gross Observations

Fexinidazole

Study Number: 0504-2007

|                              |                                       |                            |                       |
|------------------------------|---------------------------------------|----------------------------|-----------------------|
| ANIMAL: 2816                 | SEX: Female                           | GROUP: 3                   | DOSE LEVEL: 200 mg/kg |
| DAY OF DEATH: 29 Test period | STATUS: Scheduled phase sacrifice # 1 | TERMINAL BODY WEIGHT (g) : | 231.5                 |

| Tissue                 | Gross observations/comments     | Correlated Microscopic Observations                                                                                                                  |
|------------------------|---------------------------------|------------------------------------------------------------------------------------------------------------------------------------------------------|
| GENER. CONDITION . . . | GOOD                            | No micropathology observations on tissue.                                                                                                            |
| HARDERIAN GLANDS . . . | No gross observations on tissue | PORPHYRIN DEPOSITS, Moderate, Multifocal.<br>HEMORRHAGE, UNILATERAL, Slight, Focal.<br>LYMPHOCYTIC INFILTRATION, Minimal, Multifocal, Unilateral..   |
| LIVER . . . . .        | No gross observations on tissue | CHRONIC INFLAMMATION, Minimal, Multifocal.<br>HEPATOCELLULAR HYPERTROPHY, CENTRIOBULAR, Minimal.<br>HEPATOCELLULAR VACUOLATION, PERIPORTAL, Minimal. |

The following tissues have no gross observations and were not examined microscopically:

|                 |                  |                  |                 |                 |
|-----------------|------------------|------------------|-----------------|-----------------|
| ADRENALS        | AORTA            | BONE MARROW      | BRAIN           | CECUM           |
| COLON           | DIAPHRAGM        | DUODENUM         | ESOPHAGUS       | EYES            |
| FEMUR           | HEART            | ILEUM            | JEJUNUM         | KIDNEYS         |
| MANDIBULAR L.N. | MESENTERIC L.N.  | LUNG             | MAMMARY GLAND   | SKELETAL MUSCLE |
| SCIATIC NERVE   | OPTIC NERVES     | OVARIES          | PANCREAS        | PITUITARY       |
| PARATHYROIDS    | SPINAL CORD CERV | SPINAL CORD THOR | MANDIBULAR S.G. | PAROTIDS        |
| STIFLE JOINT    | SKIN             | SPLEEN           | STOMACH         | STERNUM         |
| THYROIDS        | THYMUS           | TONGUE           | TRACHEA         | URINARY BLADDER |
| UTERUS          | VAGINA           |                  |                 |                 |

The following tissues have no gross observations and were marked as unremarkable microscopically:  
No tissue to list.



CONFIDENTIAL

Appendix 10  
Individual Animal Microscopic vs. Gross Observations

Fexinidazole

Study Number: 0504-2007

ANIMAL: 2817                      SEX: Female                      GROUP: 3                      DOSE LEVEL: 200 mg/kg  
DAY OF DEATH: 29 Test period                      STATUS: Scheduled phase sacrifice # 1                      TERMINAL BODY WEIGHT (g) : 238.1

| Tissue                 | Gross observations/comments     | Correlated Microscopic Observations                                                                                                                                                                                                  |
|------------------------|---------------------------------|--------------------------------------------------------------------------------------------------------------------------------------------------------------------------------------------------------------------------------------|
| GENER. CONDITION . . . | GOOD                            | No micropathology observations on tissue.                                                                                                                                                                                            |
| HARDERIAN GLANDS . . . | No gross observations on tissue | PORPHYRIN DEPOSITS, Slight, Multifocal.<br>ADENITIS, UNILATERAL, Slight, Focal, Acute.                                                                                                                                               |
| LIVER . . . . .        | No gross observations on tissue | CHRONIC INFLAMMATION, Minimal, Multifocal.<br>HEPATOCELLULAR HYPERTROPHY, CENTRIOLOBULAR, Minimal.<br>HEPATOCELLULAR VACUOLATION, PERIportal, Minimal.<br>FOCAL NECROSIS, SUBCAPSULAR, Minimal. / with associated acute inflammation |

The following tissues have no gross observations and were not examined microscopically:

|                 |                  |                  |                 |                 |
|-----------------|------------------|------------------|-----------------|-----------------|
| ADRENALS        | AORTA            | BONE MARROW      | BRAIN           | CECUM           |
| COLON           | DIAPHRAGM        | DUODENUM         | ESOPHAGUS       | EYES            |
| FEMUR           | HEART            | ILEUM            | JEJUNUM         | KIDNEYS         |
| MANDIBULAR L.N. | MESENTERIC L.N.  | LUNG             | MAMMARY GLAND   | SKELETAL MUSCLE |
| SCIATIC NERVE   | OPTIC NERVES     | OVARIES          | PANCREAS        | PITUITARY       |
| PARATHYROIDS    | SPINAL CORD CERV | SPINAL CORD THOR | MANDIBULAR S.G. | PAROTIDS        |
| STIFLE JOINT    | SKIN             | SPLEEN           | STOMACH         | STERNUM         |
| THYROIDS        | THYMUS           | TONGUE           | TRACHEA         | URINARY BLADDER |
| UTERUS          | VAGINA           |                  |                 |                 |

The following tissues have no gross observations and were marked as unremarkable microscopically:  
No tissue to list.

CONFIDENTIAL

Appendix 10  
Individual Animal Microscopic vs. Gross Observations

Fexinidazole

Study Number: 0504-2007

ANIMAL: 2818                      SEX: Female                      GROUP: 3                      DOSE LEVEL: 200 mg/kg  
DAY OF DEATH: 29 Test period                      STATUS: Scheduled phase sacrifice # 1                      TERMINAL BODY WEIGHT (g) : 233.2

| Tissue                 | Gross observations/comments     | Correlated Microscopic Observations                                                                                                                   |
|------------------------|---------------------------------|-------------------------------------------------------------------------------------------------------------------------------------------------------|
| GENER. CONDITION . . . | GOOD                            | No micropathology observations on tissue.                                                                                                             |
| HARDERIAN GLANDS . . . | No gross observations on tissue | PORPHYRIN DEPOSITS, Moderate, Multifocal.<br>HEMORRHAGE, UNILATERAL, Slight, Multifocal.                                                              |
| LIVER . . . . .        | No gross observations on tissue | CHRONIC INFLAMMATION, Minimal, Multifocal.<br>HEPATOCELLULAR HYPERTROPHY, CENTRIOLOBULAR, Minimal.<br>HEPATOCELLULAR VACUOLATION, PERIportal, Slight. |

The following tissues have no gross observations and were not examined microscopically:

- |                 |                  |                  |                 |                 |
|-----------------|------------------|------------------|-----------------|-----------------|
| ADRENALS        | AORTA            | BONE MARROW      | BRAIN           | CECUM           |
| COLON           | DIAPHRAGM        | DUODENUM         | ESOPHAGUS       | EYES            |
| FEMUR           | HEART            | ILEUM            | JEJUNUM         | KIDNEYS         |
| MANDIBULAR L.N. | MESENTERIC L.N.  | LUNG             | MAMMARY GLAND   | SKELETAL MUSCLE |
| SCIATIC NERVE   | OPTIC NERVES     | OVARIES          | PANCREAS        | PITUITARY       |
| PARATHYROIDS    | SPINAL CORD CERV | SPINAL CORD THOR | MANDIBULAR S.G. | PAROTIDS        |
| STIFLE JOINT    | SKIN             | SPLEEN           | STOMACH         | STERNUM         |
| THYROIDS        | THYMUS           | TONGUE           | TRACHEA         | URINARY BLADDER |
| UTERUS          | VAGINA           |                  |                 |                 |

The following tissues have no gross observations and were marked as unremarkable microscopically:  
No tissue to list.

CONFIDENTIAL

Appendix 10  
Individual Animal Microscopic vs. Gross Observations

Fexinidazole

Study Number: 0504-2007

---

|                              |                                       |                            |                       |
|------------------------------|---------------------------------------|----------------------------|-----------------------|
| ANIMAL: 2819                 | SEX: Female                           | GROUP: 3                   | DOSE LEVEL: 200 mg/kg |
| DAY OF DEATH: 29 Test period | STATUS: Scheduled phase sacrifice # 1 | TERMINAL BODY WEIGHT (g) : | 221.9                 |

---

| Tissue                 | Gross observations/comments     | Correlated Microscopic Observations                                                                                                                   |
|------------------------|---------------------------------|-------------------------------------------------------------------------------------------------------------------------------------------------------|
| GENER. CONDITION . . . | GOOD                            | No micropathology observations on tissue.                                                                                                             |
| HARDERIAN GLANDS . . . | No gross observations on tissue | PORPHYRIN DEPOSITS, Slight, Multifocal.<br>HEMORRHAGE, UNILATERAL, Slight, Multifocal.                                                                |
| LIVER . . . . .        | No gross observations on tissue | CHRONIC INFLAMMATION, Minimal, Multifocal.<br>HEPATOCELLULAR HYPERTROPHY, CENTRIOLOBULAR, Minimal.<br>HEPATOCELLULAR VACUOLATION, PERIportal, Slight. |

The following tissues have no gross observations and were not examined microscopically:

- |                 |                  |                  |                 |                 |
|-----------------|------------------|------------------|-----------------|-----------------|
| ADRENALS        | AORTA            | BONE MARROW      | BRAIN           | CECUM           |
| COLON           | DIAPHRAGM        | DUODENUM         | ESOPHAGUS       | EYES            |
| FEMUR           | HEART            | ILEUM            | JEJUNUM         | KIDNEYS         |
| MANDIBULAR L.N. | MESENTERIC L.N.  | LUNG             | MAMMARY GLAND   | SKELETAL MUSCLE |
| SCIATIC NERVE   | OPTIC NERVES     | OVARIES          | PANCREAS        | PITUITARY       |
| PARATHYROIDS    | SPINAL CORD CERV | SPINAL CORD THOR | MANDIBULAR S.G. | PAROTIDS        |
| STIFLE JOINT    | SKIN             | SPLEEN           | STOMACH         | STERNUM         |
| THYROIDS        | THYMUS           | TONGUE           | TRACHEA         | URINARY BLADDER |
| UTERUS          | VAGINA           |                  |                 |                 |

The following tissues have no gross observations and were marked as unremarkable microscopically:  
No tissue to list.

CONFIDENTIAL

Appendix 10  
Individual Animal Microscopic vs. Gross Observations

Fexinidazole

Study Number: 0504-2007

ANIMAL: 2820                      SEX: Female                      GROUP: 4                      DOSE LEVEL: 800 mg/kg  
DAY OF DEATH: 30 Test period                      STATUS: Scheduled phase sacrifice # 1                      TERMINAL BODY WEIGHT (g) : 207.9

| Tissue                  | Gross observations/comments     | Correlated Microscopic Observations                                                               |
|-------------------------|---------------------------------|---------------------------------------------------------------------------------------------------|
| GENER. CONDITION . . .  | GOOD                            | No micropathology observations on tissue.                                                         |
| HARDERIAN GLANDS . . .  | No gross observations on tissue | PORPHYRIN DEPOSITS, Slight, Multifocal.                                                           |
| LIVER . . . . .         | No gross observations on tissue | CHRONIC INFLAMMATION, Minimal, Multifocal.<br>HEPATOCELLULAR HYPERTROPHY, CENTRIOLOBULAR, Slight. |
| MANDIBULAR L.N. . . . . | No gross observations on tissue | PLASMACYTOSIS, Moderate, Diffuse.                                                                 |
| PARATHYROIDS . . . . .  | No gross observations on tissue | ONLY ONE PARATHYROID AVAILABLE FOR EXAMINATION, Present.                                          |

The following tissues have no gross observations and were not examined microscopically:  
No tissue to list.

The following tissues have no gross observations and were marked as unremarkable microscopically:

|                  |                 |                 |                 |                  |
|------------------|-----------------|-----------------|-----------------|------------------|
| ADRENALS         | AORTA           | BONE MARROW     | BRAIN           | CECUM            |
| COLON            | DIAPHRAGM       | DUODENUM        | ESOPHAGUS       | EYES             |
| FEMUR            | HEART           | ILEUM           | JEJUNUM         | KIDNEYS          |
| MESENTERIC L.N.  | LUNG            | MAMMARY GLAND   | SKELETAL MUSCLE | SCIATIC NERVE    |
| OPTIC NERVES     | OVARIES         | PANCREAS        | PITUITARY       | SPINAL CORD CERV |
| SPINAL CORD THOR | MANDIBULAR S.G. | PAROTIDS        | STIFLE JOINT    | SKIN             |
| SPLEEN           | STOMACH         | STERNUM         | THYROIDS        | THYMUS           |
| TONGUE           | TRACHEA         | URINARY BLADDER | UTERUS          | VAGINA           |

CONFIDENTIAL

Appendix 10  
Individual Animal Microscopic vs. Gross Observations

Fexinidazole

Study Number: 0504-2007

ANIMAL: 2821                      SEX: Female                      GROUP: 4                      DOSE LEVEL: 800 mg/kg  
DAY OF DEATH: 30 Test period                      STATUS: Scheduled phase sacrifice # 1                      TERMINAL BODY WEIGHT (g) : 195.4

| Tissue                  | Gross observations/comments     | Correlated Microscopic Observations                                                                                                                   |
|-------------------------|---------------------------------|-------------------------------------------------------------------------------------------------------------------------------------------------------|
| GENER. CONDITION . . .  | GOOD                            | No micropathology observations on tissue.                                                                                                             |
| HARDERIAN GLANDS . . .  | No gross observations on tissue | PORPHYRIN DEPOSITS, Slight, Multifocal.                                                                                                               |
| LIVER . . . . .         | No gross observations on tissue | CHRONIC INFLAMMATION, Minimal, Multifocal.<br>HEPATOCELLULAR HYPERTROPHY, CENTRIOLOBULAR, Slight.<br>HEPATOCELLULAR VACUOLATION, PERIPORTAL, Minimal. |
| MANDIBULAR L.N. . . . . | No gross observations on tissue | PLASMACYTOSIS, Moderate, Diffuse.                                                                                                                     |
| THYROIDS . . . . .      | No gross observations on tissue | LYMPHOCYTIC INFILTRATION, Minimal, Focal, Unilateral..                                                                                                |

The following tissues have no gross observations and were not examined microscopically:  
No tissue to list.

The following tissues have no gross observations and were marked as unremarkable microscopically:

|                  |                  |                 |                 |               |
|------------------|------------------|-----------------|-----------------|---------------|
| ADRENALS         | AORTA            | BONE MARROW     | BRAIN           | CECUM         |
| COLON            | DIAPHRAGM        | DUODENUM        | ESOPHAGUS       | EYES          |
| FEMUR            | HEART            | ILEUM           | JEJUNUM         | KIDNEYS       |
| MESENTERIC L.N.  | LUNG             | MAMMARY GLAND   | SKELETAL MUSCLE | SCIATIC NERVE |
| OPTIC NERVES     | OVARIES          | PANCREAS        | PITUITARY       | PARATHYROIDS  |
| SPINAL CORD CERV | SPINAL CORD THOR | MANDIBULAR S.G. | PAROTIDS        | STIFLE JOINT  |
| SKIN             | SPLEEN           | STOMACH         | STERNUM         | THYMUS        |
| TONGUE           | TRACHEA          | URINARY BLADDER | UTERUS          | VAGINA        |

CONFIDENTIAL

Appendix 10  
Individual Animal Microscopic vs. Gross Observations

Fexinidazole

Study Number: 0504-2007

ANIMAL: 2822                      SEX: Female                      GROUP: 4                      DOSE LEVEL: 800 mg/kg  
DAY OF DEATH: 30 Test period                      STATUS: Scheduled phase sacrifice # 1                      TERMINAL BODY WEIGHT (g) : 228.2

| Tissue                 | Gross observations/comments                                   | Correlated Microscopic Observations                                                                                                                       |
|------------------------|---------------------------------------------------------------|-----------------------------------------------------------------------------------------------------------------------------------------------------------|
| GENER. CONDITION . . . | GOOD                                                          | No micropathology observations on tissue.                                                                                                                 |
| HARDERIAN GLANDS . . . | No gross observations on tissue                               | PORPHYRIN DEPOSITS, Moderate, Multifocal.                                                                                                                 |
| LIVER . . . . .        | No gross observations on tissue                               | CHRONIC INFLAMMATION, Minimal, Multifocal.<br>HEPATOCELLULAR HYPERTROPHY, CENTRIOBULAR,<br>Slight.<br>HEPATOCELLULAR VACUOLATION, PERIPORTAL,<br>Minimal. |
| LUNG . . . . .         | No gross observations on tissue                               | ALVEOLAR MACROPHAGE INFILTRATION, Minimal,<br>Multifocal.                                                                                                 |
| OPTIC NERVES . . . . . | No gross observations on tissue                               | ONLY ONE NERVE IS AVAILABLE FOR<br>EXAMINATION, Present.                                                                                                  |
| SKIN . . . . .         | ALOPECIA/ one area in the right shoulder<br>region, 30x20 mm. | Tissue is unremarkable.                                                                                                                                   |
| THYROIDS . . . . .     | No gross observations on tissue                               | LYMPHOCYTIC INFILTRATION, Minimal, Focal,<br>Unilateral..                                                                                                 |

The following tissues have no gross observations and were not examined microscopically:  
No tissue to list.

CONFIDENTIAL

Appendix 10  
Individual Animal Microscopic vs. Gross Observations

Fexinidazole

Study Number: 0504-2007

---

|                              |                                       |                            |                       |
|------------------------------|---------------------------------------|----------------------------|-----------------------|
| ANIMAL: 2822                 | SEX: Female                           | GROUP: 4                   | DOSE LEVEL: 800 mg/kg |
| DAY OF DEATH: 30 Test period | STATUS: Scheduled phase sacrifice # 1 | TERMINAL BODY WEIGHT (g) : | 228.2                 |

---

| Tissue | Gross observations/comments | Correlated Microscopic Observations |
|--------|-----------------------------|-------------------------------------|
|--------|-----------------------------|-------------------------------------|

---

The following tissues have no gross observations and were marked as unremarkable microscopically:

|                  |                 |               |                 |                  |
|------------------|-----------------|---------------|-----------------|------------------|
| ADRENALS         | AORTA           | BONE MARROW   | BRAIN           | CECUM            |
| COLON            | DIAPHRAGM       | DUODENUM      | ESOPHAGUS       | EYES             |
| FEMUR            | HEART           | ILEUM         | JEJUNUM         | KIDNEYS          |
| MANDIBULAR L.N.  | MESENTERIC L.N. | MAMMARY GLAND | SKELETAL MUSCLE | SCIATIC NERVE    |
| OVARIES          | PANCREAS        | PITUITARY     | PARATHYROIDS    | SPINAL CORD CERV |
| SPINAL CORD THOR | MANDIBULAR S.G. | PAROTIDS      | STIFLE JOINT    | SPLEEN           |
| STOMACH          | STERNUM         | THYMUS        | TONGUE          | TRACHEA          |
| URINARY BLADDER  | UTERUS          | VAGINA        |                 |                  |

CONFIDENTIAL

Appendix 10  
Individual Animal Microscopic vs. Gross Observations

Fexinidazole

Study Number: 0504-2007

ANIMAL: 2823                      SEX: Female                      GROUP: 4                      DOSE LEVEL: 800 mg/kg  
DAY OF DEATH: 30 Test period                      STATUS: Scheduled phase sacrifice # 1                      TERMINAL BODY WEIGHT (g) : 248.6

| Tissue                  | Gross observations/comments     | Correlated Microscopic Observations                                                                                                                |
|-------------------------|---------------------------------|----------------------------------------------------------------------------------------------------------------------------------------------------|
| GENER. CONDITION . . .  | GOOD                            | No micropathology observations on tissue.                                                                                                          |
| HEART . . . . .         | No gross observations on tissue | MYOCARDIAL INFLAMMATION, Minimal, Multifocal.                                                                                                      |
| HARDERIAN GLANDS . . .  | No gross observations on tissue | PORPHYRIN DEPOSITS, Moderate, Multifocal.<br>LYMPHOCYTIC INFILTRATION, Minimal, Focal, Unilateral..                                                |
| LIVER . . . . .         | No gross observations on tissue | CHRONIC INFLAMMATION, Minimal, Multifocal.<br>HEPATOCELLULAR HYPERTROPHY, CENTRIOBULAR, Slight.<br>HEPATOCELLULAR VACUOLATION, PERIPORTAL, Slight. |
| MANDIBULAR L.N. . . . . | No gross observations on tissue | PLASMACYTOSIS, Moderate, Diffuse, Unilateral..                                                                                                     |
| PARATHYROIDS . . . . .  | No gross observations on tissue | ONLY ONE PARATHYROID AVAILABLE FOR EXAMINATION, Present.                                                                                           |

The following tissues have no gross observations and were not examined microscopically:  
No tissue to list.



CONFIDENTIAL

Appendix 10  
Individual Animal Microscopic vs. Gross Observations

Fexinidazole

Study Number: 0504-2007

---

|                              |                                       |                            |                       |
|------------------------------|---------------------------------------|----------------------------|-----------------------|
| ANIMAL: 2823                 | SEX: Female                           | GROUP: 4                   | DOSE LEVEL: 800 mg/kg |
| DAY OF DEATH: 30 Test period | STATUS: Scheduled phase sacrifice # 1 | TERMINAL BODY WEIGHT (g) : | 248.6                 |

---

| Tissue | Gross observations/comments | Correlated Microscopic Observations |
|--------|-----------------------------|-------------------------------------|
|--------|-----------------------------|-------------------------------------|

---

The following tissues have no gross observations and were marked as unremarkable microscopically:

|                 |                 |                 |                  |                  |
|-----------------|-----------------|-----------------|------------------|------------------|
| ADRENALS        | AORTA           | BONE MARROW     | BRAIN            | CECUM            |
| COLON           | DIAPHRAGM       | DUODENUM        | ESOPHAGUS        | EYES             |
| FEMUR           | ILEUM           | JEJUNUM         | KIDNEYS          | MESENTERIC L.N.  |
| LUNG            | MAMMARY GLAND   | SKELETAL MUSCLE | SCIATIC NERVE    | OPTIC NERVES     |
| OVARIES         | PANCREAS        | PITUITARY       | SPINAL CORD CERV | SPINAL CORD THOR |
| MANDIBULAR S.G. | PAROTIDS        | STIFLE JOINT    | SKIN             | SPLEEN           |
| STOMACH         | STERNUM         | THYROIDS        | THYMUS           | TONGUE           |
| TRACHEA         | URINARY BLADDER | UTERUS          | VAGINA           |                  |

CONFIDENTIAL

Appendix 10  
Individual Animal Microscopic vs. Gross Observations

Fexinidazole

Study Number: 0504-2007

|                              |                    |                            |                       |
|------------------------------|--------------------|----------------------------|-----------------------|
| ANIMAL: 2824                 | SEX: Female        | GROUP: 4                   | DOSE LEVEL: 800 mg/kg |
| DAY OF DEATH: 14 Test period | STATUS: FOUND DEAD | TERMINAL BODY WEIGHT (g) : | 195.0                 |

| Tissue                  | Gross observations/comments      | Correlated Microscopic Observations                                        |
|-------------------------|----------------------------------|----------------------------------------------------------------------------|
| AORTA . . . . .         | No gross observations on tissue  | INFLAMMATION OF ADJACENT TISSUES,<br>Moderate, Multifocal, Acute.          |
| BONE MARROW . . . . .   | No gross observations on tissue  | SMEAR NOT SAMPLED, Present.                                                |
| DIAPHRAGM . . . . .     | No gross observations on tissue  | MYOSITIS, Slight, Multifocal, Acute.<br>PLEURITIS, Slight, Diffuse, Acute. |
| GENER. CONDITION . . .  | FAIRLY GOOD<br>AUTOLYTIC CHANGES | No micropathology observations on tissue.                                  |
| HEART . . . . .         | No gross observations on tissue  | PERICARDIAL INFLAMMATION, Slight,<br>Multifocal, Acute.                    |
| JEJUNUM . . . . .       | No gross observations on tissue  | Tissue is autolytic and unreadable.                                        |
| HARDERIAN GLANDS . . .  | No gross observations on tissue  | PORPHYRIN DEPOSITS, Marked, Diffuse.                                       |
| MANDIBULAR L.N. . . . . | No gross observations on tissue  | LYMPHOID DEPLETION, Moderate, Diffuse.                                     |
| MESENTERIC L.N. . . . . | No gross observations on tissue  | LYMPHOID DEPLETION, Slight, Diffuse.                                       |
| LUNG . . . . .          | No gross observations on tissue  | PLEURITIS, Moderate, Multifocal, Acute.                                    |

CONFIDENTIAL

Appendix 10  
Individual Animal Microscopic vs. Gross Observations

Fexinidazole

Study Number: 0504-2007

|                              |                    |                            |                       |
|------------------------------|--------------------|----------------------------|-----------------------|
| ANIMAL: 2824                 | SEX: Female        | GROUP: 4                   | DOSE LEVEL: 800 mg/kg |
| DAY OF DEATH: 14 Test period | STATUS: FOUND DEAD | TERMINAL BODY WEIGHT (g) : | 195.0                 |

| Tissue | Gross observations/comments | Correlated Microscopic Observations |
|--------|-----------------------------|-------------------------------------|
|--------|-----------------------------|-------------------------------------|

|                          |                                                                                                  |                                                                                                                                                                                                                                                                                                                                          |
|--------------------------|--------------------------------------------------------------------------------------------------|------------------------------------------------------------------------------------------------------------------------------------------------------------------------------------------------------------------------------------------------------------------------------------------------------------------------------------------|
| LUNG                     |                                                                                                  | pleuritis is mainly characterized by the presence of abundant inflammatory exudate in the pleural cavity, focally adherent to the pleura and with scant involvement of the lung parenchyma. These findings correlated with the abnormal contents, in particular with the clear liquid, noted on gross examination in the pleural cavity. |
| OPTIC NERVES . . . . .   | No gross observations on tissue                                                                  | ONLY ONE NERVE IS AVAILABLE FOR EXAMINATION, Present.                                                                                                                                                                                                                                                                                    |
| PLEURAL CAVITY . . . . . | ABNORMAL CONTENTS/ clear liquid and soft yellowish material adherent to the diaphragm and lungs. | Tissue is unremarkable.<br><br>for abnormal contents noted on gross examination see "lungs".                                                                                                                                                                                                                                             |
| PARATHYROIDS . . . . .   | No gross observations on tissue                                                                  | ONLY ONE PARATHYROID AVAILABLE FOR EXAMINATION, Present.                                                                                                                                                                                                                                                                                 |
| MANDIBULAR S.G. . . . .  | No gross observations on tissue                                                                  | ACINAR HYPERTROPHY, Slight, Diffuse.                                                                                                                                                                                                                                                                                                     |
| PAROTIDS . . . . .       | No gross observations on tissue                                                                  | ACINAR HYPERTROPHY, Slight, Diffuse.                                                                                                                                                                                                                                                                                                     |
| SPLEEN . . . . .         | No gross observations on tissue                                                                  | LYMPHOID DEPLETION, Moderate, Diffuse.                                                                                                                                                                                                                                                                                                   |

CONFIDENTIAL

Appendix 10  
Individual Animal Microscopic vs. Gross Observations

Fexinidazole

Study Number: 0504-2007

|                              |                    |                            |                       |
|------------------------------|--------------------|----------------------------|-----------------------|
| ANIMAL: 2824                 | SEX: Female        | GROUP: 4                   | DOSE LEVEL: 800 mg/kg |
| DAY OF DEATH: 14 Test period | STATUS: FOUND DEAD | TERMINAL BODY WEIGHT (g) : | 195.0                 |

| Tissue             | Gross observations/comments     | Correlated Microscopic Observations                                               |
|--------------------|---------------------------------|-----------------------------------------------------------------------------------|
| THYROIDS . . . . . | No gross observations on tissue | COLLOID DEPLETION, Moderate.                                                      |
| THYMUS . . . . .   | No gross observations on tissue | LYMPHOID DEPLETION, Moderate, Diffuse.<br>PLEURITIS, Moderate, Multifocal, Acute. |

The following tissues have no gross observations and were not examined microscopically:  
No tissue to list.

The following tissues have no gross observations and were marked as unremarkable microscopically:

|                 |               |                  |                  |              |
|-----------------|---------------|------------------|------------------|--------------|
| ADRENALS        | BRAIN         | CECUM            | COLON            | DUODENUM     |
| ESOPHAGUS       | EYES          | FEMUR            | ILEUM            | KIDNEYS      |
| LIVER           | MAMMARY GLAND | SKELETAL MUSCLE  | SCIATIC NERVE    | OVARIES      |
| PANCREAS        | PITUITARY     | SPINAL CORD CERV | SPINAL CORD THOR | STIFLE JOINT |
| SKIN            | STOMACH       | STERNUM          | TONGUE           | TRACHEA      |
| URINARY BLADDER | UTERUS        | VAGINA           |                  |              |

CONFIDENTIAL

Appendix 10  
Individual Animal Microscopic vs. Gross Observations

Fexinidazole

Study Number: 0504-2007

ANIMAL: 2825                      SEX: Female                      GROUP: 4                      DOSE LEVEL: 800 mg/kg  
DAY OF DEATH: 29 Test period                      STATUS: Scheduled phase sacrifice # 1                      TERMINAL BODY WEIGHT (g) : 213.5

| Tissue                  | Gross observations/comments     | Correlated Microscopic Observations                                                                     |
|-------------------------|---------------------------------|---------------------------------------------------------------------------------------------------------|
| GENER. CONDITION . . .  | GOOD                            | No micropathology observations on tissue.                                                               |
| KIDNEYS . . . . .       | No gross observations on tissue | CHRONIC INFLAMMATION, Minimal, Focal,<br>Unilateral left..                                              |
| HARDERIAN GLANDS . . .  | No gross observations on tissue | PORPHYRIN DEPOSITS, Moderate, Multifocal.                                                               |
| LIVER . . . . .         | No gross observations on tissue | CHRONIC INFLAMMATION, Minimal, Multifocal.<br><br>HEPATOCELLULAR HYPERTROPHY, CENTRILOBULAR,<br>Slight. |
| MANDIBULAR L.N. . . . . | No gross observations on tissue | PLASMACYTOSIS, Moderate, Diffuse,<br>Unilateral..                                                       |
| OPTIC NERVES . . . . .  | No gross observations on tissue | ONLY ONE NERVE IS AVAILABLE FOR<br>EXAMINATION, Present.                                                |

The following tissues have no gross observations and were not examined microscopically:  
No tissue to list.

The following tissues have no gross observations and were marked as unremarkable microscopically:

|                 |               |                 |                  |                  |
|-----------------|---------------|-----------------|------------------|------------------|
| ADRENALS        | AORTA         | BONE MARROW     | BRAIN            | CECUM            |
| COLON           | DIAPHRAGM     | DUODENUM        | ESOPHAGUS        | EYES             |
| FEMUR           | HEART         | ILEUM           | JEJUNUM          | MESENTERIC L.N.  |
| LUNG            | MAMMARY GLAND | SKELETAL MUSCLE | SCIATIC NERVE    | OVARIES          |
| PANCREAS        | PITUITARY     | PARATHYROIDS    | SPINAL CORD CERV | SPINAL CORD THOR |
| MANDIBULAR S.G. | PAROTIDS      | STIFLE JOINT    | SKIN             | SPLEEN           |

CONFIDENTIAL

Appendix 10  
Individual Animal Microscopic vs. Gross Observations

Fexinidazole

Study Number: 0504-2007

---

|                              |                                       |                            |                       |
|------------------------------|---------------------------------------|----------------------------|-----------------------|
| ANIMAL: 2825                 | SEX: Female                           | GROUP: 4                   | DOSE LEVEL: 800 mg/kg |
| DAY OF DEATH: 29 Test period | STATUS: Scheduled phase sacrifice # 1 | TERMINAL BODY WEIGHT (g) : | 213.5                 |

---

| Tissue | Gross observations/comments | Correlated Microscopic Observations |
|--------|-----------------------------|-------------------------------------|
|--------|-----------------------------|-------------------------------------|

---

|         |                 |          |        |        |
|---------|-----------------|----------|--------|--------|
| STOMACH | STERNUM         | THYROIDS | THYMUS | TONGUE |
| TRACHEA | URINARY BLADDER | UTERUS   | VAGINA |        |

CONFIDENTIAL

Appendix 10  
Individual Animal Microscopic vs. Gross Observations

Fexinidazole

Study Number: 0504-2007

|                              |                                       |                            |                       |
|------------------------------|---------------------------------------|----------------------------|-----------------------|
| ANIMAL: 2826                 | SEX: Female                           | GROUP: 4                   | DOSE LEVEL: 800 mg/kg |
| DAY OF DEATH: 29 Test period | STATUS: Scheduled phase sacrifice # 1 | TERMINAL BODY WEIGHT (g) : | 212.3                 |

| Tissue                  | Gross observations/comments     | Correlated Microscopic Observations                                                                                                                                 |
|-------------------------|---------------------------------|---------------------------------------------------------------------------------------------------------------------------------------------------------------------|
| GENER. CONDITION . . .  | GOOD                            | No micropathology observations on tissue.                                                                                                                           |
| KIDNEYS . . . . .       | No gross observations on tissue | CHRONIC INFLAMMATION, Minimal, Focal,<br>Unilateral right..<br><br>MEDULLARY TUBULAR DILATATION, Moderate,<br>Focal, Unilateral right..                             |
| HARDERIAN GLANDS . . .  | No gross observations on tissue | PORPHYRIN DEPOSITS, Slight, Multifocal.                                                                                                                             |
| LIVER . . . . .         | No gross observations on tissue | CHRONIC INFLAMMATION, Minimal, Multifocal.<br><br>HEPATOCELLULAR HYPERTROPHY, CENTRIOLOBULAR,<br>Slight.<br><br>HEPATOCELLULAR VACUOLATION, PERIportal,<br>Minimal. |
| MANDIBULAR L.N. . . . . | No gross observations on tissue | PLASMACYTOSIS, Marked, Diffuse,<br>Unilateral..                                                                                                                     |
| OPTIC NERVES . . . . .  | No gross observations on tissue | ONLY ONE NERVE IS AVAILABLE FOR<br>EXAMINATION, Present.                                                                                                            |
| PARATHYROIDS . . . . .  | No gross observations on tissue | ONLY ONE PARATHYROID AVAILABLE FOR<br>EXAMINATION, Present.                                                                                                         |

The following tissues have no gross observations and were not examined microscopically:  
No tissue to list.

CONFIDENTIAL

Appendix 10  
Individual Animal Microscopic vs. Gross Observations

Fexinidazole

Study Number: 0504-2007

---

|                              |                                       |                            |                       |
|------------------------------|---------------------------------------|----------------------------|-----------------------|
| ANIMAL: 2826                 | SEX: Female                           | GROUP: 4                   | DOSE LEVEL: 800 mg/kg |
| DAY OF DEATH: 29 Test period | STATUS: Scheduled phase sacrifice # 1 | TERMINAL BODY WEIGHT (g) : | 212.3                 |

---

| Tissue | Gross observations/comments | Correlated Microscopic Observations |
|--------|-----------------------------|-------------------------------------|
|--------|-----------------------------|-------------------------------------|

---

The following tissues have no gross observations and were marked as unremarkable microscopically:

|                 |               |                  |                  |                 |
|-----------------|---------------|------------------|------------------|-----------------|
| ADRENALS        | AORTA         | BONE MARROW      | BRAIN            | CECUM           |
| COLON           | DIAPHRAGM     | DUODENUM         | ESOPHAGUS        | EYES            |
| FEMUR           | HEART         | ILEUM            | JEJUNUM          | MESENTERIC L.N. |
| LUNG            | MAMMARY GLAND | SKELETAL MUSCLE  | SCIATIC NERVE    | OVARIES         |
| PANCREAS        | PITUITARY     | SPINAL CORD CERV | SPINAL CORD THOR | MANDIBULAR S.G. |
| PAROTIDS        | STIFLE JOINT  | SKIN             | SPLEEN           | STOMACH         |
| STERNUM         | THYROIDS      | THYMUS           | TONGUE           | TRACHEA         |
| URINARY BLADDER | UTERUS        | VAGINA           |                  |                 |



CONFIDENTIAL

Appendix 10  
Individual Animal Microscopic vs. Gross Observations

Fexinidazole

Study Number: 0504-2007

ANIMAL: 2827                      SEX: Female                      GROUP: 4                      DOSE LEVEL: 800 mg/kg  
DAY OF DEATH: 29 Test period                      STATUS: Scheduled phase sacrifice # 1                      TERMINAL BODY WEIGHT (g) : 223.5

| Tissue                  | Gross observations/comments     | Correlated Microscopic Observations                                                                                                                  |
|-------------------------|---------------------------------|------------------------------------------------------------------------------------------------------------------------------------------------------|
| GENER. CONDITION . . .  | GOOD                            | No micropathology observations on tissue.                                                                                                            |
| HARDERIAN GLANDS . . .  | No gross observations on tissue | PORPHYRIN DEPOSITS, Slight, Multifocal.                                                                                                              |
| LIVER . . . . .         | No gross observations on tissue | CHRONIC INFLAMMATION, Minimal, Multifocal.<br>HEPATOCELLULAR HYPERTROPHY, CENTRIOLOBULAR, Slight.<br>HEPATOCELLULAR VACUOLATION, PERIPORTAL, Slight. |
| MANDIBULAR L.N. . . . . | No gross observations on tissue | PLASMACYTOSIS, Slight, Diffuse.                                                                                                                      |
| OPTIC NERVES . . . . .  | No gross observations on tissue | ONLY ONE NERVE IS AVAILABLE FOR EXAMINATION, Present.                                                                                                |
| PARATHYROIDS . . . . .  | No gross observations on tissue | ONLY ONE PARATHYROID AVAILABLE FOR EXAMINATION, Present.                                                                                             |
| SPLEEN . . . . .        | No gross observations on tissue | EXTRAMEDULLARY HEMOPOIESIS, Minimal, Multifocal.                                                                                                     |

The following tissues have no gross observations and were not examined microscopically:  
No tissue to list.

CONFIDENTIAL

Appendix 10  
Individual Animal Microscopic vs. Gross Observations

Fexinidazole

Study Number: 0504-2007

---

|                              |                                       |                            |                       |
|------------------------------|---------------------------------------|----------------------------|-----------------------|
| ANIMAL: 2827                 | SEX: Female                           | GROUP: 4                   | DOSE LEVEL: 800 mg/kg |
| DAY OF DEATH: 29 Test period | STATUS: Scheduled phase sacrifice # 1 | TERMINAL BODY WEIGHT (g) : | 223.5                 |

---

| Tissue | Gross observations/comments | Correlated Microscopic Observations |
|--------|-----------------------------|-------------------------------------|
|--------|-----------------------------|-------------------------------------|

---

The following tissues have no gross observations and were marked as unremarkable microscopically:

|                 |           |               |                  |                  |
|-----------------|-----------|---------------|------------------|------------------|
| ADRENALS        | AORTA     | BONE MARROW   | BRAIN            | CECUM            |
| COLON           | DIAPHRAGM | DUODENUM      | ESOPHAGUS        | EYES             |
| FEMUR           | HEART     | ILEUM         | JEJUNUM          | KIDNEYS          |
| MESENTERIC L.N. | LUNG      | MAMMARY GLAND | SKELETAL MUSCLE  | SCIATIC NERVE    |
| OVARIES         | PANCREAS  | PITUITARY     | SPINAL CORD CERV | SPINAL CORD THOR |
| MANDIBULAR S.G. | PAROTIDS  | STIFLE JOINT  | SKIN             | STOMACH          |
| STERNUM         | THYROIDS  | THYMUS        | TONGUE           | TRACHEA          |
| URINARY BLADDER | UTERUS    | VAGINA        |                  |                  |

CONFIDENTIAL

Appendix 10  
Individual Animal Microscopic vs. Gross Observations

Fexinidazole

Study Number: 0504-2007

ANIMAL: 2828                      SEX: Female                      GROUP: 4                      DOSE LEVEL: 800 mg/kg  
DAY OF DEATH: 29 Test period                      STATUS: Scheduled phase sacrifice # 1                      TERMINAL BODY WEIGHT (g) : 219.9

| Tissue                  | Gross observations/comments     | Correlated Microscopic Observations                                                                                                                          |
|-------------------------|---------------------------------|--------------------------------------------------------------------------------------------------------------------------------------------------------------|
| GENER. CONDITION . . .  | GOOD                            | No micropathology observations on tissue.                                                                                                                    |
| HARDERIAN GLANDS . . .  | No gross observations on tissue | PORPHYRIN DEPOSITS, Slight, Multifocal.                                                                                                                      |
| LIVER . . . . .         | No gross observations on tissue | CHRONIC INFLAMMATION, Minimal, Multifocal.<br><br>HEPATOCELLULAR HYPERTROPHY, CENTRIOLOBULAR, Slight.<br><br>HEPATOCELLULAR VACUOLATION, PERIPORTAL, Slight. |
| MANDIBULAR L.N. . . . . | No gross observations on tissue | PLASMACYTOSIS, Moderate, Diffuse.                                                                                                                            |
| LUNG . . . . .          | No gross observations on tissue | ALVEOLAR MACROPHAGE INFILTRATION, Minimal, Multifocal.                                                                                                       |

The following tissues have no gross observations and were not examined microscopically:  
No tissue to list.

The following tissues have no gross observations and were marked as unremarkable microscopically:

|                  |                 |                 |               |                  |
|------------------|-----------------|-----------------|---------------|------------------|
| ADRENALS         | AORTA           | BONE MARROW     | BRAIN         | CECUM            |
| COLON            | DIAPHRAGM       | DUODENUM        | ESOPHAGUS     | EYES             |
| FEMUR            | HEART           | ILEUM           | JEJUNUM       | KIDNEYS          |
| MESENTERIC L.N.  | MAMMARY GLAND   | SKELETAL MUSCLE | SCIATIC NERVE | OPTIC NERVES     |
| OVARIES          | PANCREAS        | PITUITARY       | PARATHYROIDS  | SPINAL CORD CERV |
| SPINAL CORD THOR | MANDIBULAR S.G. | PAROTIDS        | STIFLE JOINT  | SKIN             |
| SPLEEN           | STOMACH         | STERNUM         | THYROIDS      | THYMUS           |
| TONGUE           | TRACHEA         | URINARY BLADDER | UTERUS        | VAGINA           |

CONFIDENTIAL

Appendix 10  
Individual Animal Microscopic vs. Gross Observations

Fexinidazole

Study Number: 0504-2007

|                              |                                       |                            |                       |
|------------------------------|---------------------------------------|----------------------------|-----------------------|
| ANIMAL: 2829                 | SEX: Female                           | GROUP: 4                   | DOSE LEVEL: 800 mg/kg |
| DAY OF DEATH: 29 Test period | STATUS: Scheduled phase sacrifice # 1 | TERMINAL BODY WEIGHT (g) : | 220.0                 |

| Tissue                  | Gross observations/comments     | Correlated Microscopic Observations                                                                                                                        |
|-------------------------|---------------------------------|------------------------------------------------------------------------------------------------------------------------------------------------------------|
| GENER. CONDITION . . .  | GOOD                            | No micropathology observations on tissue.                                                                                                                  |
| KIDNEYS . . . . .       | No gross observations on tissue | CHRONIC INFLAMMATION, Minimal, Multifocal, Unilateral right..<br><br>CORTICAL TUBULAR REGENERATIVE BASOPHILIA, Minimal, Multifocal.                        |
| HARDERIAN GLANDS . . .  | No gross observations on tissue | PORPHYRIN DEPOSITS, Slight, Multifocal.                                                                                                                    |
| LIVER . . . . .         | No gross observations on tissue | CHRONIC INFLAMMATION, Minimal, Multifocal.<br><br>HEPATOCELLULAR HYPERTROPHY, CENTRIOBULAR, Slight.<br><br>HEPATOCELLULAR VACUOLATION, PERIPORTAL, Slight. |
| MANDIBULAR L.N. . . . . | No gross observations on tissue | PLASMACYTOSIS, Moderate, Diffuse.                                                                                                                          |
| LUNG . . . . .          | No gross observations on tissue | ALVEOLAR MACROPHAGE INFILTRATION, Minimal, Multifocal.                                                                                                     |
| OPTIC NERVES . . . . .  | No gross observations on tissue | ONLY ONE NERVE IS AVAILABLE FOR EXAMINATION, Present.                                                                                                      |

The following tissues have no gross observations and were not examined microscopically:  
No tissue to list.

CONFIDENTIAL

Appendix 10  
Individual Animal Microscopic vs. Gross Observations

Fexinidazole

Study Number: 0504-2007

---

|                              |                                       |                            |                       |
|------------------------------|---------------------------------------|----------------------------|-----------------------|
| ANIMAL: 2829                 | SEX: Female                           | GROUP: 4                   | DOSE LEVEL: 800 mg/kg |
| DAY OF DEATH: 29 Test period | STATUS: Scheduled phase sacrifice # 1 | TERMINAL BODY WEIGHT (g) : | 220.0                 |

---

| Tissue | Gross observations/comments | Correlated Microscopic Observations |
|--------|-----------------------------|-------------------------------------|
|--------|-----------------------------|-------------------------------------|

---

The following tissues have no gross observations and were marked as unremarkable microscopically:

|                 |                 |                  |                  |                 |
|-----------------|-----------------|------------------|------------------|-----------------|
| ADRENALS        | AORTA           | BONE MARROW      | BRAIN            | CECUM           |
| COLON           | DIAPHRAGM       | DUODENUM         | ESOPHAGUS        | EYES            |
| FEMUR           | HEART           | ILEUM            | JEJUNUM          | MESENTERIC L.N. |
| MAMMARY GLAND   | SKELETAL MUSCLE | SCIATIC NERVE    | OVARIES          | PANCREAS        |
| PITUITARY       | PARATHYROIDS    | SPINAL CORD CERV | SPINAL CORD THOR | MANDIBULAR S.G. |
| PAROTIDS        | STIFLE JOINT    | SKIN             | SPLEEN           | STOMACH         |
| STERNUM         | THYROIDS        | THYMUS           | TONGUE           | TRACHEA         |
| URINARY BLADDER | UTERUS          | VAGINA           |                  |                 |

CONFIDENTIAL

Appendix 10  
Individual Animal Microscopic vs. Gross Observations

Fexinidazole

Study Number: 0504-2007

|                              |                               |                            |                       |
|------------------------------|-------------------------------|----------------------------|-----------------------|
| ANIMAL: 2830                 | SEX: Female                   | GROUP: 4                   | DOSE LEVEL: 800 mg/kg |
| DAY OF DEATH: 43 Test period | STATUS: Final phase sacrifice | TERMINAL BODY WEIGHT (g) : | 245.0                 |

| Tissue                 | Gross observations/comments     | Correlated Microscopic Observations                                                                                                                                             |
|------------------------|---------------------------------|---------------------------------------------------------------------------------------------------------------------------------------------------------------------------------|
| GENER. CONDITION . . . | GOOD                            | No micropathology observations on tissue.                                                                                                                                       |
| HARDERIAN GLANDS . . . | No gross observations on tissue | PORPHYRIN DEPOSITS, Slight, Multifocal.<br>HEMORRHAGE, UNILATERAL, Minimal, Multifocal.<br>ADENITIS, UNILATERAL, Minimal, Multifocal, Acute.                                    |
| LIVER . . . . .        | No gross observations on tissue | CHRONIC INFLAMMATION, Minimal, Multifocal.<br>HEPATOCELLULAR VACUOLATION, PERIportal, Minimal.<br>FOCAL NECROSIS, SUBCAPSULAR, Minimal. / with associated chronic inflammation. |
| SPLEEN . . . . .       | ENLARGED                        | Tissue is unremarkable.                                                                                                                                                         |

The following tissues have no gross observations and were not examined microscopically:

|                 |                  |                  |                 |                 |
|-----------------|------------------|------------------|-----------------|-----------------|
| ADRENALS        | AORTA            | BONE MARROW      | BRAIN           | CECUM           |
| COLON           | DIAPHRAGM        | DUODENUM         | ESOPHAGUS       | EYES            |
| FEMUR           | HEART            | ILEUM            | JEJUNUM         | KIDNEYS         |
| MANDIBULAR L.N. | MESENTERIC L.N.  | LUNG             | MAMMARY GLAND   | SKELETAL MUSCLE |
| SCIATIC NERVE   | OPTIC NERVES     | OVARIES          | PANCREAS        | PITUITARY       |
| PARATHYROIDS    | SPINAL CORD CERV | SPINAL CORD THOR | MANDIBULAR S.G. | PAROTIDS        |
| STIFLE JOINT    | SKIN             | STOMACH          | STERNUM         | THYROIDS        |
| THYMUS          | TONGUE           | TRACHEA          | URINARY BLADDER | UTERUS          |
| VAGINA          |                  |                  |                 |                 |

The following tissues have no gross observations and were marked as unremarkable microscopically:  
No tissue to list.

CONFIDENTIAL

Appendix 10  
Individual Animal Microscopic vs. Gross Observations

Fexinidazole

Study Number: 0504-2007

|                              |                               |                            |                       |
|------------------------------|-------------------------------|----------------------------|-----------------------|
| ANIMAL: 2831                 | SEX: Female                   | GROUP: 4                   | DOSE LEVEL: 800 mg/kg |
| DAY OF DEATH: 43 Test period | STATUS: Final phase sacrifice | TERMINAL BODY WEIGHT (g) : | 206.8                 |

| Tissue                 | Gross observations/comments     | Correlated Microscopic Observations                                                       |
|------------------------|---------------------------------|-------------------------------------------------------------------------------------------|
| GENER. CONDITION . . . | GOOD                            | No micropathology observations on tissue.                                                 |
| HARDERIAN GLANDS . . . | No gross observations on tissue | PORPHYRIN DEPOSITS, Moderate, Multifocal.<br>HEMORRHAGE, UNILATERAL, Minimal, Multifocal. |
| LIVER . . . . .        | No gross observations on tissue | CHRONIC INFLAMMATION, Minimal, Multifocal.                                                |

The following tissues have no gross observations and were not examined microscopically:

|                 |                  |                  |                 |                 |
|-----------------|------------------|------------------|-----------------|-----------------|
| ADRENALS        | AORTA            | BONE MARROW      | BRAIN           | CECUM           |
| COLON           | DIAPHRAGM        | DUODENUM         | ESOPHAGUS       | EYES            |
| FEMUR           | HEART            | ILEUM            | JEJUNUM         | KIDNEYS         |
| MANDIBULAR L.N. | MESENTERIC L.N.  | LUNG             | MAMMARY GLAND   | SKELETAL MUSCLE |
| SCIATIC NERVE   | OPTIC NERVES     | OVARIES          | PANCREAS        | PITUITARY       |
| PARATHYROIDS    | SPINAL CORD CERV | SPINAL CORD THOR | MANDIBULAR S.G. | PAROTIDS        |
| STIFLE JOINT    | SKIN             | SPLEEN           | STOMACH         | STERNUM         |
| THYROIDS        | THYMUS           | TONGUE           | TRACHEA         | URINARY BLADDER |
| UTERUS          | VAGINA           |                  |                 |                 |

The following tissues have no gross observations and were marked as unremarkable microscopically:  
No tissue to list.

CONFIDENTIAL

Appendix 10  
Individual Animal Microscopic vs. Gross Observations

Fexinidazole

Study Number: 0504-2007

|                              |                               |                            |                       |
|------------------------------|-------------------------------|----------------------------|-----------------------|
| ANIMAL: 2832                 | SEX: Female                   | GROUP: 4                   | DOSE LEVEL: 800 mg/kg |
| DAY OF DEATH: 43 Test period | STATUS: Final phase sacrifice | TERMINAL BODY WEIGHT (g) : | 213.0                 |

| Tissue                 | Gross observations/comments     | Correlated Microscopic Observations                                                               |
|------------------------|---------------------------------|---------------------------------------------------------------------------------------------------|
| GENER. CONDITION . . . | GOOD                            | No micropathology observations on tissue.                                                         |
| HARDERIAN GLANDS . . . | No gross observations on tissue | PORPHYRIN DEPOSITS, Slight, Multifocal.<br>HEMORRHAGE, UNILATERAL, Slight, Multifocal.            |
| LIVER . . . . .        | No gross observations on tissue | CHRONIC INFLAMMATION, Minimal, Multifocal.<br>HEPATOCELLULAR HYPERTROPHY, CENTRILOBULAR, Minimal. |

The following tissues have no gross observations and were not examined microscopically:

|                 |                  |                  |                 |                 |
|-----------------|------------------|------------------|-----------------|-----------------|
| ADRENALS        | AORTA            | BONE MARROW      | BRAIN           | CECUM           |
| COLON           | DIAPHRAGM        | DUODENUM         | ESOPHAGUS       | EYES            |
| FEMUR           | HEART            | ILEUM            | JEJUNUM         | KIDNEYS         |
| MANDIBULAR L.N. | MESENTERIC L.N.  | LUNG             | MAMMARY GLAND   | SKELETAL MUSCLE |
| SCIATIC NERVE   | OPTIC NERVES     | OVARIES          | PANCREAS        | PITUITARY       |
| PARATHYROIDS    | SPINAL CORD CERV | SPINAL CORD THOR | MANDIBULAR S.G. | PAROTIDS        |
| STIFLE JOINT    | SKIN             | SPLEEN           | STOMACH         | STERNUM         |
| THYROIDS        | THYMUS           | TONGUE           | TRACHEA         | URINARY BLADDER |
| UTERUS          | VAGINA           |                  |                 |                 |

The following tissues have no gross observations and were marked as unremarkable microscopically:  
No tissue to list.



CONFIDENTIAL

Appendix 10  
Individual Animal Microscopic vs. Gross Observations

Fexinidazole

Study Number: 0504-2007

|                              |                               |                            |                       |
|------------------------------|-------------------------------|----------------------------|-----------------------|
| ANIMAL: 2833                 | SEX: Female                   | GROUP: 4                   | DOSE LEVEL: 800 mg/kg |
| DAY OF DEATH: 43 Test period | STATUS: Final phase sacrifice | TERMINAL BODY WEIGHT (g) : | 229.2                 |

| Tissue                 | Gross observations/comments     | Correlated Microscopic Observations                                                                |
|------------------------|---------------------------------|----------------------------------------------------------------------------------------------------|
| GENER. CONDITION . . . | GOOD                            | No micropathology observations on tissue.                                                          |
| HARDERIAN GLANDS . . . | No gross observations on tissue | PORPHYRIN DEPOSITS, Slight, Multifocal.<br><br>ADENITIS, UNILATERAL, Minimal, Multifocal, Acute.   |
| LIVER . . . . .        | No gross observations on tissue | CHRONIC INFLAMMATION, Minimal, Multifocal.<br><br>HEPATOCELLULAR VACUOLATION, PERIportal, Minimal. |

The following tissues have no gross observations and were not examined microscopically:

|                 |                  |                  |                 |                 |
|-----------------|------------------|------------------|-----------------|-----------------|
| ADRENALS        | AORTA            | BONE MARROW      | BRAIN           | CECUM           |
| COLON           | DIAPHRAGM        | DUODENUM         | ESOPHAGUS       | EYES            |
| FEMUR           | HEART            | ILEUM            | JEJUNUM         | KIDNEYS         |
| MANDIBULAR L.N. | MESENTERIC L.N.  | LUNG             | MAMMARY GLAND   | SKELETAL MUSCLE |
| SCIATIC NERVE   | OPTIC NERVES     | OVARIES          | PANCREAS        | PITUITARY       |
| PARATHYROIDS    | SPINAL CORD CERV | SPINAL CORD THOR | MANDIBULAR S.G. | PAROTIDS        |
| STIFLE JOINT    | SKIN             | SPLEEN           | STOMACH         | STERNUM         |
| THYROIDS        | THYMUS           | TONGUE           | TRACHEA         | URINARY BLADDER |
| UTERUS          | VAGINA           |                  |                 |                 |

The following tissues have no gross observations and were marked as unremarkable microscopically:  
No tissue to list.

CONFIDENTIAL

Appendix 10  
Individual Animal Microscopic vs. Gross Observations

Fexinidazole

Study Number: 0504-2007

|                              |                               |                            |                       |
|------------------------------|-------------------------------|----------------------------|-----------------------|
| ANIMAL: 2834                 | SEX: Female                   | GROUP: 4                   | DOSE LEVEL: 800 mg/kg |
| DAY OF DEATH: 43 Test period | STATUS: Final phase sacrifice | TERMINAL BODY WEIGHT (g) : | 228.7                 |

| Tissue                 | Gross observations/comments     | Correlated Microscopic Observations                                                                                                    |
|------------------------|---------------------------------|----------------------------------------------------------------------------------------------------------------------------------------|
| GENER. CONDITION . . . | GOOD                            | No micropathology observations on tissue.                                                                                              |
| HARDERIAN GLANDS . . . | No gross observations on tissue | PORPHYRIN DEPOSITS, Moderate, Multifocal.<br>HEMORRHAGE, UNILATERAL, Moderate, Focal.<br>ADENITIS, UNILATERAL, Slight, Focal, Chronic. |
| LIVER . . . . .        | No gross observations on tissue | CHRONIC INFLAMMATION, Minimal, Multifocal.                                                                                             |

The following tissues have no gross observations and were not examined microscopically:

|                 |                  |                  |                 |                 |
|-----------------|------------------|------------------|-----------------|-----------------|
| ADRENALS        | AORTA            | BONE MARROW      | BRAIN           | CECUM           |
| COLON           | DIAPHRAGM        | DUODENUM         | ESOPHAGUS       | EYES            |
| FEMUR           | HEART            | ILEUM            | JEJUNUM         | KIDNEYS         |
| MANDIBULAR L.N. | MESENTERIC L.N.  | LUNG             | MAMMARY GLAND   | SKELETAL MUSCLE |
| SCIATIC NERVE   | OPTIC NERVES     | OVARIES          | PANCREAS        | PITUITARY       |
| PARATHYROIDS    | SPINAL CORD CERV | SPINAL CORD THOR | MANDIBULAR S.G. | PAROTIDS        |
| STIFLE JOINT    | SKIN             | SPLEEN           | STOMACH         | STERNUM         |
| THYROIDS        | THYMUS           | TONGUE           | TRACHEA         | URINARY BLADDER |
| UTERUS          | VAGINA           |                  |                 |                 |

The following tissues have no gross observations and were marked as unremarkable microscopically:  
No tissue to list.

## ***Appendix 11 Toxicokinetic Report***

Fexinidazole  
Toxicokinetic Report for the study No. 0504-2007

---

## **TOXICOKINETIC REPORT FOR THE STUDY**

### **Fexinidazole: 28-Day Oral Toxicity Study in the Rat**

|                 |              |
|-----------------|--------------|
| Product Name:   | Fexinidazole |
| Study Number:   | 0504-2007    |
| Study Director: |              |
| Status:         | Final        |

**TABLE OF CONTENTS**

1. INTRODUCTION AND OBJECTIVE .....3

2. STUDY SPONSOR .....3

3. TEST FACILITY .....3

4. REGULATORY REQUIREMENTS.....3

5. ABBREVIATIONS .....3

6. METHODS .....4

    6.1. Study Design .....4

    6.2. Sample Collection and Handling.....4

    6.3. Bioanalytical Method .....4

    6.4. Pharmacokinetic Calculations .....4

7. RESULTS .....5

    7.1. Tables and Figures.....5

    7.2. Control Sample Analysis.....5

    7.3. Pharmacokinetic results.....6

8. CONCLUSIONS.....9

9. CONTRIBUTORS .....10

10. ARCHIVING .....10

11. REFERENCES .....10

TABLES AND FIGURES .....11

APPENDICES

    Appendix 1. Individual plasma concentrations .....59

    Appendix 2. In-Study Bioanalytical Validation Data .....79

    Appendix 3. Certificates of Analysis.....88

Fexinidazole  
Toxicokinetic Report for the study No. 0504-2007

---

## 1. INTRODUCTION AND OBJECTIVE

Fexinidazole is a 5-nitroimidazole derivate under investigation for the treatment of the Human African Trypanosomiasis (HAT), known as sleeping sickness.

As part of a GLP toxicity study, the toxicokinetics of Fexinidazole and its sulfoxide and sulfone metabolites were evaluated after the first and repeated oral administrations of Fexinidazole to male and female Crl:CD (SD)IGS BR rats.

## 2. STUDY SPONSOR

DNDi – Drugs for Neglected Diseases *Initiative*  
Place St Gervais 1, 1201 Geneva, Switzerland.

## 3. TEST FACILITY

Accelera

## 4. REGULATORY REQUIREMENTS

This study will be GLP regulated and will be conducted in compliance with:

- DECRETO LEGISLATIVO 2 Marzo 2007, No. 50 and
- Organization for Economic Co-operation and Development (OECD) Principles of Good Laboratory Practice (GLP) (as revised in 1997).

## 5. ABBREVIATIONS

The following abbreviations are used in this document:

|                          |                                                                      |
|--------------------------|----------------------------------------------------------------------|
| AUC <sub>0-t(last)</sub> | Area under the plasma concentration vs. time curve up to finite time |
| C <sub>max</sub>         | Maximal plasma concentration                                         |
| CV                       | Coefficient of variation of the mean                                 |
| F                        | Female                                                               |
| ID                       | Animal identification code                                           |
| LC                       | Liquid chromatography                                                |
| LLOQ                     | Lower limit of quantification                                        |
| M                        | Male                                                                 |
| MS                       | Mass-spectrometry                                                    |
| Norm                     | Normalized value                                                     |
| QC                       | Quality control sample                                               |
| R <sup>2</sup>           | Correlation coefficient                                              |
| RA                       | Accumulation ratio                                                   |

Fexinidazole  
Toxicokinetic Report for the study No. 0504-2007

---

|                    |                                   |
|--------------------|-----------------------------------|
| SD                 | Standard deviation of the mean    |
| STD                | Standard sample                   |
| t <sub>1/2,z</sub> | Terminal half-life                |
| t <sub>max</sub>   | Time to peak plasma concentration |
| ULOQ               | Upper limit of quantification     |

## 6. METHODS

### 6.1. Study Design

The study was conducted according to the study protocol and related amendment [1, 2]. Fexinidazole was orally given by gavage once a day for 28 days to male and female Sprague Dawley rats according to the following scheme

| Dose<br>(mg/kg/day) | Volume<br>(mL/kg/day) | Rat ID                     |
|---------------------|-----------------------|----------------------------|
| 0                   | 10                    | M: 2835-2837; F: 2847-2849 |
| 50                  | 10                    | M: 2838-2840; F: 2850-2852 |
| 200                 | 10                    | M: 2841-2843; F: 2853-2855 |
| 800                 | 10                    | M: 2844-2846; F: 2856-2858 |

Fexinidazole was suspended with 5% Tween 80 in 0.5% Methyl cellulose 400 cP.

### 6.2. Sample Collection and Handling

Blood samples (about 0.25 mL/sampling time) were withdrawn from retro-orbital sinus plexus under isoflurane anesthesia and put in heparinized plastic tubes kept on a ice-water bath, then centrifuged for 10 min at 1200g at +4°C and two aliquots of about 50 µL of plasma were stored in a freezer at -80°C until analysis. Blood was taken from three rats/gender/dose on Days 1 and 14 at pre-dose and 0.5, 1, 2, 4, 8 and 24 hours after dosing, on Day 28 at pre-dose and 1, 2, 4, 8, 24, 48 and 72 hours after dosing. After the administration of the vehicle, the samples were taken from three rats/gender at pre-dose and 2 hours post dosing.

### 6.3. Bioanalytical Method

Rat plasma concentrations of Fexinidazole and its sulfoxide (M1) and sulfone (M2) metabolites were determined by a validated LC/MS/MS method [3,4]. The calibration range for the assay was 5-1000 ng/mL for Fexinidazole and 25-25000 ng/mL for M1 and M2. Study samples containing analytes concentrations above the upper limit of quantitation were diluted with blank matrix prior to analysis.

### 6.4. Pharmacokinetic Calculations

Pharmacokinetic evaluation was carried out using non-compartmental approach with the aid of the Watson package (v. 6.4.0.04, Thermo Fisher Scientific, Waltham, MA, USA) and Excel spreadsheet (Microsoft Inc., Seattle, USA).

Fexinidazole  
Toxicokinetic Report for the study No. 0504-2007

---

In the calculations, the undetectable concentrations between detectable ones were ignored.

After each dose level,  $C_{max}$  and  $t_{max}$  of Fexinidazole and sulfoxide and sulfone metabolites were read from raw data as the coordinates of the highest measured concentration. The area under plasma concentration vs. time curve to finite time,  $AUC_{0-t(last)}$ , was determined by the linear trapezoidal rule up to the last detectable concentration. On Day 28, since the blood sampling was performed up to 72 hours post dosing, in addition to  $AUC_{0-t(last)}$ , AUC within 24 hours post dosing was calculated and denoted  $AUC_{0-24}$ . This AUC was calculated in order to compare AUC values on Day 28 to those on Day 1 and Day 14. On Day 28, in addition, the half-life of the terminal phase,  $t_{1/2,z}$ , was determined by linear regression analysis of the natural-log concentration vs. time curve, where  $t_{1/2,z} = \ln(2)/\text{slope}$  of the regression line.

After each dose,  $C_{max}$  and AUC values of each compound were also normalized to 1 mg/kg/day dose level.

Metabolite to parent ratio was calculated based on  $C_{max}$  and  $AUC_{0-t(last)}$  values corrected for the molecular weight.

Fexinidazole and metabolites accumulation ratios, based on  $C_{max}$  ( $RA, C_{max}$ ),  $AUC_{0-24}$  ( $RA, AUC_{0-24}$ ) and  $AUC_{0-t(last)}$  ( $RA, AUC_{0-t(last)}$ ), were calculated as the ratio between the parameters obtained on Day 14 and Day 28 to the corresponding one at Day 1.

Descriptive statistics (mean  $\pm$  SD, %CV) were reported for plasma concentrations and pharmacokinetic parameters of each compound sorted by dose, gender and day of dosing.

## 7. RESULTS

### 7.1. Tables and Figures

Mean  $C_{max}$ ,  $t_{max}$ , AUC within 24 hours post dosing and  $AUC_{0-t(last)}$  parameters of each compound are reported in Tables 1 and 2, whilst individual and mean parameters of each compound are reported in Tables 3 - 20. Individual and mean ( $\pm$ SD, CV%) plasma concentrations of Fexinidazole and sulfoxide and sulfone metabolites are reported in Tables 2A1 - 19A1 of Appendix 1. Individual plasma concentrations of Fexinidazole and both metabolites are plot in Figures 1 - 9, whilst the mean concentrations are plot in Figures 10 - 15. Mean normalized  $C_{max}$  and  $AUC_{0-t(last)}$  values of Fexinidazole and metabolites vs. dose are plot in Figures 16 - 21.

In-study bioanalytical validation data are reported in Appendix 2. All analytical batches met acceptance criteria as described in PCD-M-BPK-001-01 SOP [5]. Bioanalytical data are stored in Watson LIMS (v. 6.4.0.04, Thermo Fisher Scientific, Waltham, MA, USA) under Project ID: 348-Fexinidazole and Study ID 0504-2007. Certificates of analysis are reported in Appendix 3.

### 7.2. Control Sample Analysis

One detectable concentrations of each compound was measured in the control samples. Analyses were rerun in duplicate and the results confirmed. The detectable concentration of Fexinidazole was 9.61 ng/mL, whilst those of sulfoxide and sulfone metabolites were 29.4



Fexinidazole  
Toxicokinetic Report for the study No. 0504-2007

and 32.7 ng/mL, respectively (see Table 1A1 of Appendix 1). These values were close to the lower limit of quantification of the method for each compound. For this reason, the observed contaminations do not affect the conclusions drawn from the toxicokinetic analysis for this study.

### 7.3. Pharmacokinetic results

#### Day 1

Mean  $\pm$ SD systemic exposure to Fexinidazole is reported in the following table

| Dose<br>mg/kg | Male                      |                          |                                        | Female                    |                          |                                        |
|---------------|---------------------------|--------------------------|----------------------------------------|---------------------------|--------------------------|----------------------------------------|
|               | C <sub>max</sub><br>ng/mL | t <sub>max</sub><br>hour | AUC <sub>0-t(last)</sub><br>ng·hour/mL | C <sub>max</sub><br>ng/mL | t <sub>max</sub><br>hour | AUC <sub>0-t(last)</sub><br>ng·hour/mL |
| 50            | 39 $\pm$ 17               | 1 $\pm$ 0                | 178 $\pm$ 99                           | 149 $\pm$ 46              | 2 $\pm$ 2                | 759 $\pm$ 153                          |
| 200           | 165 $\pm$ 97              | 2 $\pm$ 1                | 1120 $\pm$ 708                         | 604 $\pm$ 211             | 2 $\pm$ 2                | 3200 $\pm$ 856                         |
| 800           | 1478 $\pm$ 1111           | 2 $\pm$ 1                | 10000 $\pm$ 2160                       | 1483 $\pm$ 200            | 2 $\pm$ 1                | 15700 $\pm$ 3610                       |

The male rat ID 2843 at 200 mg/kg showed levels of Fexinidazole about five times lower than those measured in the other two rats.

At each dose, C<sub>max</sub> and AUC<sub>0-t(last)</sub> values were about three times higher in female than in male rats. In both genders, the maximal plasma concentrations of Fexinidazole were promptly achieved, on average within 2 hours post dosing. In both genders, AUC<sub>0-t(last)</sub> values of Fexinidazole increased with the dose administered (Figures 16 - 17).

Mean  $\pm$ SD systemic exposure to the sulfoxide metabolite is reported in the following table

| Dose<br>mg/kg | Male                      |                          |                                        | Female                    |                          |                                        |
|---------------|---------------------------|--------------------------|----------------------------------------|---------------------------|--------------------------|----------------------------------------|
|               | C <sub>max</sub><br>ng/mL | t <sub>max</sub><br>hour | AUC <sub>0-t(last)</sub><br>ng·hour/mL | C <sub>max</sub><br>ng/mL | t <sub>max</sub><br>hour | AUC <sub>0-t(last)</sub><br>ng·hour/mL |
| 50            | 1503 $\pm$ 413            | 2 $\pm$ 1                | 7660 $\pm$ 2380                        | 3893 $\pm$ 663            | 3 $\pm$ 1                | 23200 $\pm$ 5330                       |
| 200           | 9987 $\pm$ 2131           | 2 $\pm$ 0                | 80500 $\pm$ 4310                       | 12800 $\pm$ 1127          | 3 $\pm$ 1                | 91400 $\pm$ 19700                      |
| 800           | 32833 $\pm$ 4952          | 5 $\pm$ 2                | 366000 $\pm$ 113000                    | 30633 $\pm$ 2616          | 4 $\pm$ 0                | 453000 $\pm$ 84700                     |

Apart from 50 mg/kg dose, no relevant gender difference in C<sub>max</sub> and AUC<sub>0-t(last)</sub> values was observed. In both genders, t<sub>max</sub> values of the metabolite were similar to the corresponding ones of the parent compound. In both genders, the systemic exposure to the metabolite increased roughly in direct proportion with the dose (Figures 18 - 19).

In the male rat, the metabolite to parent AUC<sub>0-t(last)</sub> ratios were, on average, 46, 107 and 37 after 50, 200 and 800 mg/kg, respectively; the corresponding values in females were 29, 30 and 28. The systemic exposure to the metabolite was much higher than that to the parent compound.

Fexinidazole  
Toxicokinetic Report for the study No. 0504-2007

Mean  $\pm$ SD systemic exposure to the sulfone metabolite is reported in the following table

| Dose<br>mg/kg | Male                      |                          |                                        | Female                    |                          |                                        |
|---------------|---------------------------|--------------------------|----------------------------------------|---------------------------|--------------------------|----------------------------------------|
|               | C <sub>max</sub><br>ng/mL | t <sub>max</sub><br>hour | AUC <sub>0-t(last)</sub><br>ng-hour/mL | C <sub>max</sub><br>ng/mL | t <sub>max</sub><br>hour | AUC <sub>0-t(last)</sub><br>ng-hour/mL |
| 50            | 1417 $\pm$ 393            | 7 $\pm$ 2                | 16500 $\pm$ 9760                       | 4417 $\pm$ 2410           | 8 $\pm$ 0                | 55800 $\pm$ 28100                      |
| 200           | 8550 $\pm$ 2309           | 8 $\pm$ 0                | 119000 $\pm$ 21900                     | 10023 $\pm$ 815           | 8 $\pm$ 0                | 134000 $\pm$ 10800                     |
| 800           | 40300 $\pm$ 1562          | 8 $\pm$ 0                | 465000 $\pm$ 264000                    | 44833 $\pm$ 20128         | 13 $\pm$ 9               | 683000 $\pm$ 241000                    |

Apart from 50 mg/kg dose, no relevant gender difference in C<sub>max</sub> and AUC<sub>0-t(last)</sub> values was observed. In both genders, t<sub>max</sub> values of the metabolite were achieved at later times in comparison with the corresponding ones of the parent compound. The systemic exposure to the metabolite increased with the dose administered (Figures 20 - 21).

In the male rats, the metabolite to parent AUC<sub>0-t(last)</sub> ratios were, on average, 81, 172 and 46 after 50, 200 and 800 mg/kg, respectively; the corresponding values in females were 64, 40 and 39. The systemic exposure to the metabolite was much higher than that to the parent compound.

Repeated dosing

Day 14 and Day 28 mean  $\pm$ SD systemic exposure to Fexinidazole is reported in the following table

| Dose<br>mg/kg/day                                                    | Male                      |                          |                                                   | Female                      |                          |                                                                    |
|----------------------------------------------------------------------|---------------------------|--------------------------|---------------------------------------------------|-----------------------------|--------------------------|--------------------------------------------------------------------|
|                                                                      | C <sub>max</sub><br>ng/mL | t <sub>max</sub><br>hour | AUC <sub>0-t(last)</sub><br>ng-hour/mL            | C <sub>max</sub><br>ng/mL   | t <sub>max</sub><br>hour | AUC <sub>0-t(last)</sub><br>ng-hour/mL                             |
| Day 14                                                               |                           |                          |                                                   |                             |                          |                                                                    |
| 50                                                                   | 62 $\pm$ 19               | 2 $\pm$ 2                | 345 $\pm$ 125                                     | 300 $\pm$ 91                | 2 $\pm$ 1                | 1310 $\pm$ 161                                                     |
| 200                                                                  | 274 $\pm$ 163             | 3 $\pm$ 1                | 2010 $\pm$ 1520                                   | 773 $\pm$ 107               | 2 $\pm$ 1                | 4030 $\pm$ 215                                                     |
| 800                                                                  | 565 $\pm$ 106             | 3 $\pm$ 1                | 5120 $\pm$ 1540                                   | 1478 $\pm$ 1115             | 3 $\pm$ 4                | 13500 $\pm$ 3620                                                   |
| Day 28                                                               |                           |                          |                                                   |                             |                          |                                                                    |
| 50                                                                   | 133 $\pm$ 24              | 4 $\pm$ 0                | 889 $\pm$ 287                                     | 422 $\pm$ 358               | 1 $\pm$ 0                | 1447 $\pm$ 335 <sup>(1)</sup><br>1630 $\pm$ 570                    |
| 200                                                                  | 255 $\pm$ 136             | 2 $\pm$ 2                | 2326 $\pm$ 1757 <sup>(1)</sup><br>4410 $\pm$ 3980 | 903 $\pm$ 87                | 2 $\pm$ 1                | 4437 $\pm$ 514 <sup>(1)</sup><br>4750 $\pm$ 508                    |
| 800                                                                  | 523 $\pm$ 127             | 2 $\pm$ 2                | 3173 $\pm$ 734 <sup>(1)</sup><br>11900 $\pm$ 5360 | 749 $\pm$ 90 <sup>(2)</sup> | 2 $\pm$ 1 <sup>(2)</sup> | 7640 $\pm$ 1782 <sup>(1,2)</sup><br>7940 $\pm$ 2210 <sup>(2)</sup> |
| <sup>(1)</sup> AUC within 24 hours post dosing<br><sup>(2)</sup> n=2 |                           |                          |                                                   |                             |                          |                                                                    |

As for Day 1, the male rat ID 2843 treated at 200 mg/kg/day showed levels of Fexinidazole remarkably lower than those measured in the other two rats.

At each dose, C<sub>max</sub> and AUC<sub>0-t(last)</sub> values were two - three times higher in female than in male rats. No relevant difference in the Fexinidazole levels were observed on Day 28 compared to Day 14. On Days 14 and 28, in both genders, the maximal plasma concentrations of Fexinidazole were achieved, on average, within 4 hours post dosing. On

Fexinidazole  
Toxicokinetic Report for the study No. 0504-2007

Day 28, in males, mean  $\pm$ SD apparent terminal half-lives were 4.7  $\pm$ 1.2, 8.8  $\pm$ 4.8 and 11  $\pm$ 2.7 hours after 50, 200 and 800 mg/kg/day, respectively. The corresponding female half-lives were 5.1  $\pm$ 5.1, 6.3  $\pm$ 4.5 and 6.7  $\pm$ 2.3 (n=2) hours. In both genders, AUC<sub>0-t(last)</sub> values of Fexinidazole increased with the dose (Figures 16 - 17).

Day 14 and Day 28 male AUC<sub>0-t(last)</sub> (AUC within 24 hours post dosing on Day 28) accumulation ratios were, on average, 2.2 and 5.7 after 50 mg/kg/day, 1.6 and 2 after 200 mg/kg/day and 0.5 and 0.3 after 800 mg/kg/day, respectively. The corresponding values in females were 1.7 and 2, 1.3 and 1.5, 0.9 and 0.4.

Day 14 and Day 28 mean  $\pm$ SD systemic exposure to the sulfoxide metabolite is reported in the following table

| Dose<br>mg/kg/day                                                    | Male                      |                          |                                        | Female                          |                          |                                        |
|----------------------------------------------------------------------|---------------------------|--------------------------|----------------------------------------|---------------------------------|--------------------------|----------------------------------------|
|                                                                      | C <sub>max</sub><br>ng/mL | t <sub>max</sub><br>hour | AUC <sub>0-t(last)</sub><br>ng·hour/mL | C <sub>max</sub><br>ng/mL       | t <sub>max</sub><br>hour | AUC <sub>0-t(last)</sub><br>ng·hour/mL |
| Day 14                                                               |                           |                          |                                        |                                 |                          |                                        |
| 50                                                                   | 2267 $\pm$ 505            | 2 $\pm$ 2                | 12500 $\pm$ 4050                       | 8197 $\pm$ 519                  | 2 $\pm$ 0                | 47100 $\pm$ 4920                       |
| 200                                                                  | 13100 $\pm$ 1044          | 3 $\pm$ 1                | 93600 $\pm$ 27300                      | 18567 $\pm$ 1266                | 3 $\pm$ 1                | 143000 $\pm$ 34900                     |
| 800                                                                  | 17733 $\pm$ 1701          | 3 $\pm$ 1                | 165000 $\pm$ 29100                     | 32233 $\pm$ 6435                | 2 $\pm$ 0                | 390000 $\pm$ 159000                    |
| Day 28                                                               |                           |                          |                                        |                                 |                          |                                        |
| 50                                                                   | 4530 $\pm$ 664            | 3 $\pm$ 1                | 29467 $\pm$ 8919 <sup>(1)</sup>        | 11413 $\pm$ 6603                | 1 $\pm$ 1                | 53833 $\pm$ 15716 <sup>(1)</sup>       |
|                                                                      |                           |                          | 30600 $\pm$ 10900                      |                                 |                          | 78000 $\pm$ 23600                      |
| 200                                                                  | 11633 $\pm$ 2403          | 3 $\pm$ 1                | 122100 $\pm$ 29340 <sup>(1)</sup>      | 22333 $\pm$ 1474                | 2 $\pm$ 1                | 138333 $\pm$ 14189 <sup>(1)</sup>      |
|                                                                      |                           |                          | 138000 $\pm$ 45000                     |                                 |                          | 153000 $\pm$ 36900                     |
| 800                                                                  | 16567 $\pm$ 2079          | 2 $\pm$ 1                | 129733 $\pm$ 56812 <sup>(1)</sup>      | 25850 $\pm$ 2051 <sup>(2)</sup> | 3 $\pm$ 1 <sup>(2)</sup> | 291500 $\pm$ 40305 <sup>(1,2)</sup>    |
|                                                                      |                           |                          | 268000 $\pm$ 64100                     |                                 |                          | 331000 $\pm$ 57300 <sup>(2)</sup>      |
| <sup>(1)</sup> AUC within 24 hours post dosing<br><sup>(2)</sup> n=2 |                           |                          |                                        |                                 |                          |                                        |

At each dose, the levels of the metabolite were about two - three times higher in the female than in the male rat. No relevant difference in the levels of the metabolite were observed on Day 28 compared to Day 14. In both genders, the maximal plasma concentrations of the sulfoxide metabolite were achieved, on average, 2 - 3 hours post dosing. On Day 28, mean  $\pm$ SD male apparent terminal half-lives were 5  $\pm$ 2, 6.3  $\pm$ 2.9 and 6.6  $\pm$ 4.1 hours after 50, 200 and 800 mg/kg/day, respectively, whilst the corresponding female half-lives were 6.1  $\pm$ 3.8, 8.1  $\pm$ 3.1 and 8.6  $\pm$ 2.3 (n=2) hours. In both genders, the systemic exposure to the metabolite increased with the dose (Figures 18 - 19).

Day 14 and Day 28 male AUC<sub>0-t(last)</sub> (AUC within 24 hours post dosing on Day 28) accumulation ratios were, on average, 1.6 and 3.9 after 50 mg/kg/day, 1.2 and 1.5 after 200 mg/kg/day and 0.5 and 0.4 after 800 mg/kg/day, respectively. The corresponding values in females were 2.1 and 2.5, 1.6 and 1.5, 0.8 and 0.6.

The systemic exposure to the metabolite was much higher than that to the parent compound.

Fexinidazole  
Toxicokinetic Report for the study No. 0504-2007

Day 14 and Day 28 mean  $\pm$ SD systemic exposure to the sulfone metabolite is reported in the following table

| Dose<br>mg/kg/day                                                    | Male                      |                          |                                        | Female                          |                          |                                        |
|----------------------------------------------------------------------|---------------------------|--------------------------|----------------------------------------|---------------------------------|--------------------------|----------------------------------------|
|                                                                      | C <sub>max</sub><br>ng/mL | t <sub>max</sub><br>hour | AUC <sub>0-t(last)</sub><br>ng·hour/mL | C <sub>max</sub><br>ng/mL       | t <sub>max</sub><br>hour | AUC <sub>0-t(last)</sub><br>ng·hour/mL |
| Day 14                                                               |                           |                          |                                        |                                 |                          |                                        |
| 50                                                                   | 4773 $\pm$ 566            | 4 $\pm$ 0                | 62800 $\pm$ 11300                      | 7980 $\pm$ 2285                 | 8 $\pm$ 0                | 116000 $\pm$ 24900                     |
| 200                                                                  | 18800 $\pm$ 1735          | 7 $\pm$ 2                | 268000 $\pm$ 35800                     | 21533 $\pm$ 2458                | 8 $\pm$ 0                | 306000 $\pm$ 31200                     |
| 800                                                                  | 30833 $\pm$ 1724          | 5 $\pm$ 2                | 423000 $\pm$ 70500                     | 50233 $\pm$ 11651               | 8 $\pm$ 0                | 664000 $\pm$ 332000                    |
| Day 28                                                               |                           |                          |                                        |                                 |                          |                                        |
| 50                                                                   | 7750 $\pm$ 831            | 7 $\pm$ 2                | 106267 $\pm$ 9530 <sup>(1)</sup>       | 10700 $\pm$ 700                 | 7 $\pm$ 2                | 174667 $\pm$ 40501 <sup>(1)</sup>      |
|                                                                      |                           |                          | 113000 $\pm$ 13700                     |                                 |                          | 197000 $\pm$ 50600                     |
| 200                                                                  | 24200 $\pm$ 3041          | 8 $\pm$ 0                | 341333 $\pm$ 39068 <sup>(1)</sup>      | 21433 $\pm$ 4179                | 8 $\pm$ 0                | 341333 $\pm$ 66124 <sup>(1)</sup>      |
|                                                                      |                           |                          | 387000 $\pm$ 34000                     |                                 |                          | 448000 $\pm$ 135000                    |
| 800                                                                  | 33000 $\pm$ 6655          | 5 $\pm$ 2                | 459000 $\pm$ 60605 <sup>(1)</sup>      | 41900 $\pm$ 2970 <sup>(2)</sup> | 6 $\pm$ 3 <sup>(2)</sup> | 571500 $\pm$ 54447 <sup>(1,2)</sup>    |
|                                                                      |                           |                          | 509000 $\pm$ 94900                     |                                 |                          | 738000 $\pm$ 135000 <sup>(2)</sup>     |
| <sup>(1)</sup> AUC within 24 hours post dosing<br><sup>(2)</sup> n=2 |                           |                          |                                        |                                 |                          |                                        |

At each dose, no relevant gender difference in C<sub>max</sub> and AUC<sub>0-t(last)</sub> values was observed. No relevant difference in the levels of the metabolite were observed on Day 28 compared to Day 14. T<sub>max</sub> values of the metabolite were achieved at later times in comparison with the corresponding ones of the parent compound. On Day 28, mean male apparent terminal half-lives were 6.1  $\pm$ 1.2, 7.5  $\pm$ 2.4 and 10  $\pm$ 3 hours after 50, 200 and 800 mg/kg/day, respectively, the corresponding half-lives in females were 13  $\pm$ 9.8, 7.3  $\pm$ 2.6 and 11  $\pm$ 5.6 (n=2) hours. The systemic exposure to the metabolite increased with the dose (Figures 20 - 21).

Day 14 and Day 28 male AUC<sub>0-t(last)</sub> (AUC within 24 hours post dosing on Day 28) accumulation ratios were, on average, 5.2 and 9.3 after 50 mg/kg/day, 2.3 and 2.9 after 200 mg/kg/day and 1.3 and 1.6 after 800 mg/kg/day, respectively. The corresponding values in females were 2.3 and 3.8, 2.3 and 2.6, 1 and 0.8.

The systemic exposure to the metabolite was much higher than that to the parent compound.

## 8. CONCLUSIONS

After the first and repeated administrations of the three dose levels, AUCs of Fexinidazole were two - three times higher in females than in males. On Days 1, 14 and 28, in both genders, AUCs of Fexinidazole increased with the dose administered. Whilst no accumulation was observed after the highest dose, in both genders, an accumulation ratio of Fexinidazole of about 2 was observed after 50 and 200 mg/kg/day.

After the first and repeated dosing to male and female rats, Fexinidazole was extensively metabolized to the sulfone and sulfoxide derivatives. The half-lives of both metabolites were similar to those of the parent compound.

## 9. CONTRIBUTORS

## 10. ARCHIVING

The protocol, the protocol amendment as original, raw data, pharmacokinetic analysis and final report as original were archived within Accelera Archive, Nerviano Medical Sciences, Italy, according the Unit Standard Operating Procedures.

## 11. REFERENCES

1. Fexinidazole: 28-Day Oral Toxicity Study in the Rat. Nerviano Medical Sciences Study Protocol 0504-2007-P, January 29, 2008.
2. Amendment no. 1 to Fexinidazole: 28-Day Oral Toxicity Study in the Rat. February 21, 2008.
3. Analytical Procedure for the Determination of Fexinidazole and its Metabolites Fexinidazole Sulphoxide (M1) and Fexinidazole Sulphone (M2) in Rat Plasma by LC-MS-MS Following Plasma Protein Precipitation. Analytical Procedure Number: NMS/FEXINIDAZOLE/03.0. NervianoMS Reference Number: 0290-2007-AP. February 29, 2008.
4. Validation of an Analytical Method for the Determination of Fexinidazole and its Metabolites M1 and M2 in Rat Plasma by LC-MS-MS. Document Number: 0290-2007-R.
5. SOP: PCD-M-BPK-001-01: "Bioanalytical Run Acceptance". 13 December 2006.

Fexinidazole  
Toxicokinetic Report for the study No. 0504-2007

---

## **TABLES AND FIGURES**

Fexinidazole  
Toxicokinetic Report for the study No. 0504-2007

**Table 1.** Summary table of mean  $\pm$ SD systemic exposure values of Fexinidazole and metabolites after oral 50, 200 and 800 mg/kg/day of Fexinidazole in male Sprague Dawley rats.

| Day           | Fexinidazole              |                          |                                        | Sulfoxide                 |                          |                                        | Sulfone                   |                          |                                        |
|---------------|---------------------------|--------------------------|----------------------------------------|---------------------------|--------------------------|----------------------------------------|---------------------------|--------------------------|----------------------------------------|
|               | C <sub>max</sub><br>ng/mL | t <sub>max</sub><br>hour | AUC <sub>0-t(last)</sub><br>ng·hour/mL | C <sub>max</sub><br>ng/mL | t <sub>max</sub><br>hour | AUC <sub>0-t(last)</sub><br>ng·hour/mL | C <sub>max</sub><br>ng/mL | t <sub>max</sub><br>hour | AUC <sub>0-t(last)</sub><br>ng·hour/mL |
| 50 mg/kg/day  |                           |                          |                                        |                           |                          |                                        |                           |                          |                                        |
| 1             | 39 $\pm$ 17               | 1 $\pm$ 0                | 178 $\pm$ 99                           | 1503 $\pm$ 413            | 2 $\pm$ 1                | 7660 $\pm$ 2380                        | 1417 $\pm$ 393            | 7 $\pm$ 2                | 16500 $\pm$ 9760                       |
| 14            | 62 $\pm$ 19               | 2 $\pm$ 2                | 345 $\pm$ 125                          | 2267 $\pm$ 505            | 2 $\pm$ 2                | 12500 $\pm$ 4050                       | 4773 $\pm$ 566            | 4 $\pm$ 0                | 62800 $\pm$ 11300                      |
| 28            | 133 $\pm$ 24              | 4 $\pm$ 0                | 889 $\pm$ 287                          | 4530 $\pm$ 664            | 3 $\pm$ 1                | 29467 $\pm$ 8919 <sup>(1)</sup>        | 7750 $\pm$ 831            | 7 $\pm$ 2                | 106267 $\pm$ 9530 <sup>(1)</sup>       |
|               |                           |                          |                                        |                           |                          | 30600 $\pm$ 10900                      |                           |                          | 113000 $\pm$ 13700                     |
| 200 mg/kg/day |                           |                          |                                        |                           |                          |                                        |                           |                          |                                        |
| 1             | 165 $\pm$ 97              | 2 $\pm$ 1                | 1120 $\pm$ 708                         | 9987 $\pm$ 2131           | 2 $\pm$ 0                | 80500 $\pm$ 4310                       | 8550 $\pm$ 2309           | 8 $\pm$ 0                | 119000 $\pm$ 21900                     |
| 14            | 274 $\pm$ 163             | 3 $\pm$ 1                | 2010 $\pm$ 1520                        | 13100 $\pm$ 1044          | 3 $\pm$ 1                | 93600 $\pm$ 27300                      | 18800 $\pm$ 1735          | 7 $\pm$ 2                | 268000 $\pm$ 35800                     |
| 28            | 255 $\pm$ 136             | 2 $\pm$ 2                | 2326 $\pm$ 1757 <sup>(1)</sup>         | 11633 $\pm$ 2403          | 3 $\pm$ 1                | 122100 $\pm$ 29340 <sup>(1)</sup>      | 24200 $\pm$ 3041          | 8 $\pm$ 0                | 341333 $\pm$ 39068 <sup>(1)</sup>      |
|               |                           |                          | 4410 $\pm$ 3980                        |                           |                          | 138000 $\pm$ 45000                     |                           |                          | 387000 $\pm$ 34000                     |
| 800 mg/kg/day |                           |                          |                                        |                           |                          |                                        |                           |                          |                                        |
| 1             | 1478 $\pm$ 1111           | 2 $\pm$ 1                | 10000 $\pm$ 2160                       | 32833 $\pm$ 4952          | 5 $\pm$ 2                | 366000 $\pm$ 113000                    | 40300 $\pm$ 1562          | 8 $\pm$ 0                | 465000 $\pm$ 264000                    |
| 14            | 565 $\pm$ 106             | 3 $\pm$ 1                | 5120 $\pm$ 1540                        | 17733 $\pm$ 1701          | 3 $\pm$ 1                | 165000 $\pm$ 29100                     | 30833 $\pm$ 1724          | 5 $\pm$ 2                | 423000 $\pm$ 70500                     |
| 28            | 523 $\pm$ 127             | 2 $\pm$ 2                | 3173 $\pm$ 734 <sup>(1)</sup>          | 16567 $\pm$ 2079          | 2 $\pm$ 1                | 129733 $\pm$ 56812 <sup>(1)</sup>      | 33000 $\pm$ 6655          | 5 $\pm$ 2                | 459000 $\pm$ 60605 <sup>(1)</sup>      |
|               |                           |                          | 11900 $\pm$ 5360                       |                           |                          | 268000 $\pm$ 64100                     |                           |                          | 509000 $\pm$ 94900                     |

<sup>(1)</sup> AUC within 24 hours post dosing (AUC<sub>0-24</sub>)

## Fexinidazole

Toxicokinetic Report for the study No. 0504-2007

**Table 2.** Summary table of mean  $\pm$ SD systemic exposure values of Fexinidazole and metabolites after oral 50, 200 and 800 mg/kg/day of Fexinidazole in female Sprague Dawley rats.

| Day               | Fexinidazole              |                          |                                         | Sulfoxide                 |                          |                                         | Sulfone                   |                          |                                         |
|-------------------|---------------------------|--------------------------|-----------------------------------------|---------------------------|--------------------------|-----------------------------------------|---------------------------|--------------------------|-----------------------------------------|
|                   | C <sub>max</sub><br>ng/mL | t <sub>max</sub><br>hour | AUC <sub>0-t</sub> (last)<br>ng·hour/mL | C <sub>max</sub><br>ng/mL | t <sub>max</sub><br>hour | AUC <sub>0-t</sub> (last)<br>ng·hour/mL | C <sub>max</sub><br>ng/mL | t <sub>max</sub><br>hour | AUC <sub>0-t</sub> (last)<br>ng·hour/mL |
| 50 mg/kg/day      |                           |                          |                                         |                           |                          |                                         |                           |                          |                                         |
| 1                 | 149 $\pm$ 46              | 2 $\pm$ 2                | 759 $\pm$ 153                           | 3893 $\pm$ 663            | 3 $\pm$ 1                | 23200 $\pm$ 5330                        | 4417 $\pm$ 2410           | 8 $\pm$ 0                | 55800 $\pm$ 28100                       |
| 14                | 300 $\pm$ 91              | 2 $\pm$ 1                | 1310 $\pm$ 161                          | 8197 $\pm$ 519            | 2 $\pm$ 0                | 47100 $\pm$ 4920                        | 7980 $\pm$ 2285           | 8 $\pm$ 0                | 116000 $\pm$ 24900                      |
| 28                | 422 $\pm$ 358             | 1 $\pm$ 0                | 1447 $\pm$ 335 <sup>(1)</sup>           | 11413 $\pm$ 6603          | 1 $\pm$ 1                | 53833 $\pm$ 15716 <sup>(1)</sup>        | 10700 $\pm$ 700           | 7 $\pm$ 2                | 174667 $\pm$ 40501 <sup>(1)</sup>       |
|                   |                           |                          | 1630 $\pm$ 570                          |                           |                          | 78000 $\pm$ 23600                       |                           |                          | 197000 $\pm$ 50600                      |
| 200 mg/kg/day     |                           |                          |                                         |                           |                          |                                         |                           |                          |                                         |
| 1                 | 604 $\pm$ 211             | 2 $\pm$ 2                | 3200 $\pm$ 856                          | 12800 $\pm$ 1127          | 3 $\pm$ 1                | 91400 $\pm$ 19700                       | 10023 $\pm$ 815           | 8 $\pm$ 0                | 134000 $\pm$ 10800                      |
| 14                | 773 $\pm$ 107             | 2 $\pm$ 1                | 4030 $\pm$ 215                          | 18567 $\pm$ 1266          | 3 $\pm$ 1                | 143000 $\pm$ 34900                      | 21533 $\pm$ 2458          | 8 $\pm$ 0                | 306000 $\pm$ 31200                      |
| 28                | 903 $\pm$ 87              | 2 $\pm$ 1                | 4437 $\pm$ 514 <sup>(1)</sup>           | 22333 $\pm$ 1474          | 2 $\pm$ 1                | 138333 $\pm$ 14189 <sup>(1)</sup>       | 21433 $\pm$ 4179          | 8 $\pm$ 0                | 341333 $\pm$ 66124 <sup>(1)</sup>       |
|                   |                           |                          | 4750 $\pm$ 508                          |                           |                          | 153000 $\pm$ 36900                      |                           |                          | 448000 $\pm$ 135000                     |
| 800 mg/kg/day     |                           |                          |                                         |                           |                          |                                         |                           |                          |                                         |
| 1                 | 1483 $\pm$ 200            | 2 $\pm$ 1                | 15700 $\pm$ 3610                        | 30633 $\pm$ 2616          | 4 $\pm$ 0                | 453000 $\pm$ 84700                      | 44833 $\pm$ 20128         | 13 $\pm$ 9               | 683000 $\pm$ 241000                     |
| 14                | 1478 $\pm$ 1115           | 3 $\pm$ 4                | 13500 $\pm$ 3620                        | 32233 $\pm$ 6435          | 2 $\pm$ 0                | 390000 $\pm$ 159000                     | 50233 $\pm$ 11651         | 8 $\pm$ 0                | 664000 $\pm$ 332000                     |
| 28 <sup>(2)</sup> | 749 $\pm$ 90              | 2 $\pm$ 1                | 7640 $\pm$ 1782 <sup>(1)</sup>          | 25850 $\pm$ 2051          | 3 $\pm$ 1                | 291500 $\pm$ 40305 <sup>(1)</sup>       | 41900 $\pm$ 2970          | 6 $\pm$ 3                | 571500 $\pm$ 54447 <sup>(1)</sup>       |
|                   |                           |                          | 7940 $\pm$ 2210                         |                           |                          | 331000 $\pm$ 57300                      |                           |                          | 738000 $\pm$ 135000                     |

<sup>(1)</sup> AUC within 24 hours post dosing (AUC<sub>0-24</sub>)<sup>(2)</sup> n=2



Fexinidazole  
Toxicokinetic Report for the study No. 0504-2007

**Table 3.** Day 1 individual and mean ( $\pm$ SD, %CV) pharmacokinetic parameters of Fexinidazole and metabolites after oral 50 mg/kg/day of Fexinidazole in male Sprague Dawley rats.

| Parameter (Units)                                                                                                                                                  | ID 2838 | ID 2839 | ID 2840 | Mean  | SD    | %CV |
|--------------------------------------------------------------------------------------------------------------------------------------------------------------------|---------|---------|---------|-------|-------|-----|
| Fexinidazole                                                                                                                                                       |         |         |         |       |       |     |
| C <sub>max</sub> (ng/mL)                                                                                                                                           | 35.5    | 24.3    | 56.9    | 38.9  | 16.6  | 43  |
| t <sub>max</sub> (hour)                                                                                                                                            | 1       | 1       | 1       | 1     | 0     | 0   |
| AUC <sub>0-t(last)</sub> Interval (hour)                                                                                                                           | 0-8     | 0-4     | 0-8     | N/A   | N/A   | N/A |
| AUC <sub>0-t(last)</sub> (ng·hour/mL)                                                                                                                              | 184     | 75.8    | 274     | 178   | 99.2  | 56  |
| C <sub>max</sub> , norm <sup>(1)</sup>                                                                                                                             | 0.71    | 0.486   | 1.14    | 0.779 | 0.332 | 43  |
| AUC <sub>0-t(last)</sub> , norm <sup>(1)</sup>                                                                                                                     | 3.68    | 1.52    | 5.48    | 3.56  | 1.98  | 56  |
| Sulfoxide                                                                                                                                                          |         |         |         |       |       |     |
| C <sub>max</sub> (ng/mL)                                                                                                                                           | 1450    | 1120    | 1940    | 1503  | 413   | 27  |
| t <sub>max</sub> (hour)                                                                                                                                            | 2       | 1       | 2       | 1.67  | 0.577 | 35  |
| AUC <sub>0-t(last)</sub> Interval (hour)                                                                                                                           | 0-8     | 0-8     | 0-8     | N/A   | N/A   | N/A |
| AUC <sub>0-t(last)</sub> (ng·hour/mL)                                                                                                                              | 7940    | 5150    | 9880    | 7660  | 2380  | 31  |
| C <sub>max</sub> , norm <sup>(1)</sup>                                                                                                                             | 29      | 22.4    | 38.8    | 30.1  | 8.25  | 27  |
| AUC <sub>0-t(last)</sub> , norm <sup>(1)</sup>                                                                                                                     | 159     | 103     | 198     | 153   | 47.8  | 31  |
| <sup>(2)</sup>                                                                                                                                                     | 38.6    | 43.6    | 32.2    | 38.2  | 5.69  | 15  |
| <sup>(3)</sup>                                                                                                                                                     | 40.8    | 64.3    | 34.1    | 46.4  | 15.8  | 34  |
| Sulfone                                                                                                                                                            |         |         |         |       |       |     |
| C <sub>max</sub> (ng/mL)                                                                                                                                           | 1470    | 1000    | 1780    | 1417  | 393   | 28  |
| t <sub>max</sub> (hour)                                                                                                                                            | 8       | 4       | 8       | 6.67  | 2.31  | 35  |
| AUC <sub>0-t(last)</sub> Interval (hour)                                                                                                                           | 0-24    | 0-8     | 0-24    | N/A   | N/A   | N/A |
| AUC <sub>0-t(last)</sub> (ng·hour/mL)                                                                                                                              | 19700   | 5580    | 24300   | 16500 | 9760  | 59  |
| C <sub>max</sub> , norm <sup>(1)</sup>                                                                                                                             | 29.4    | 20      | 35.6    | 28.3  | 7.85  | 28  |
| AUC <sub>0-t(last)</sub> , norm <sup>(1)</sup>                                                                                                                     | 394     | 112     | 486     | 331   | 195   | 59  |
| <sup>(2)</sup>                                                                                                                                                     | 37.2    | 36.9    | 28.1    | 34    | 5.18  | 15  |
| <sup>(3)</sup>                                                                                                                                                     | 96.1    | 66      | 79.6    | 80.6  | 15    | 19  |
| N/A: not applicable                                                                                                                                                |         |         |         |       |       |     |
| <sup>(1)</sup> C <sub>max</sub> (ng/mL) and AUC (ng·hour/mL) values normalized to 1 mg/kg dose.                                                                    |         |         |         |       |       |     |
| <sup>(2)</sup> C <sub>max</sub> , metabolite / C <sub>max</sub> , parent; <sup>(3)</sup> AUC <sub>0-t(last)</sub> , metabolite / AUC <sub>0-t(last)</sub> , parent |         |         |         |       |       |     |

Fexinidazole  
Toxicokinetic Report for the study No. 0504-2007

**Table 4.** Day 1 individual and mean ( $\pm$ SD, %CV) pharmacokinetic parameters of Fexinidazole and metabolites after oral 50 mg/kg/day of Fexinidazole in female Sprague Dawley rats.

| Parameter (Units)                                                                                                                                                  | ID 2850      | ID 2851 | ID 2852 | Mean  | SD    | %CV |
|--------------------------------------------------------------------------------------------------------------------------------------------------------------------|--------------|---------|---------|-------|-------|-----|
|                                                                                                                                                                    | Fexinidazole |         |         |       |       |     |
| C <sub>max</sub> (ng/mL)                                                                                                                                           | 182          | 168     | 95.6    | 149   | 46.4  | 31  |
| t <sub>max</sub> (hour)                                                                                                                                            | 1            | 0.5     | 4       | 1.83  | 1.89  | 103 |
| AUC <sub>0-t(last)</sub> Interval (hour)                                                                                                                           | 0-8          | 0-8     | 0-8     | N/A   | N/A   | N/A |
| AUC <sub>0-t(last)</sub> (ng·hour/mL)                                                                                                                              | 922          | 737     | 619     | 759   | 153   | 20  |
| C <sub>max</sub> , norm <sup>(1)</sup>                                                                                                                             | 3.64         | 3.36    | 1.91    | 2.97  | 0.929 | 31  |
| AUC <sub>0-t(last)</sub> , norm <sup>(1)</sup>                                                                                                                     | 18.4         | 14.7    | 12.4    | 15.2  | 3.03  | 20  |
|                                                                                                                                                                    | Sulfoxide    |         |         |       |       |     |
| C <sub>max</sub> (ng/mL)                                                                                                                                           | 4520         | 3960    | 3200    | 3893  | 663   | 17  |
| t <sub>max</sub> (hour)                                                                                                                                            | 4            | 2       | 4       | 3.33  | 1.15  | 35  |
| AUC <sub>0-t(last)</sub> Interval (hour)                                                                                                                           | 0-8          | 0-8     | 0-8     | N/A   | N/A   | N/A |
| AUC <sub>0-t(last)</sub> (ng·hour/mL)                                                                                                                              | 29200        | 21400   | 19000   | 23200 | 5330  | 23  |
| C <sub>max</sub> , norm <sup>(1)</sup>                                                                                                                             | 90.4         | 79.2    | 64      | 77.9  | 13.3  | 17  |
| AUC <sub>0-t(last)</sub> , norm <sup>(1)</sup>                                                                                                                     | 583          | 428     | 379     | 463   | 106   | 23  |
| <sup>(2)</sup>                                                                                                                                                     | 23.5         | 22.3    | 31.7    | 25.8  | 5.1   | 20  |
| <sup>(3)</sup>                                                                                                                                                     | 30           | 27.5    | 29      | 28.8  | 1.26  | 4   |
|                                                                                                                                                                    | Sulfone      |         |         |       |       |     |
| C <sub>max</sub> (ng/mL)                                                                                                                                           | 7190         | 2830    | 3230    | 4417  | 2410  | 55  |
| t <sub>max</sub> (hour)                                                                                                                                            | 8            | 8       | 8       | 8     | 0     | 0   |
| AUC <sub>0-t(last)</sub> Interval (hour)                                                                                                                           | 0-24         | 0-24    | 0-24    | N/A   | N/A   | N/A |
| AUC <sub>0-t(last)</sub> (ng·hour/mL)                                                                                                                              | 88100        | 37500   | 41700   | 55800 | 28100 | 50  |
| C <sub>max</sub> , norm <sup>(1)</sup>                                                                                                                             | 144          | 56.6    | 64.6    | 88.4  | 48.3  | 55  |
| AUC <sub>0-t(last)</sub> , norm <sup>(1)</sup>                                                                                                                     | 1760         | 750     | 834     | 1110  | 560   | 50  |
| <sup>(2)</sup>                                                                                                                                                     | 35.4         | 15.1    | 30.3    | 27    | 10.6  | 39  |
| <sup>(3)</sup>                                                                                                                                                     | 85.7         | 45.7    | 60.4    | 63.9  | 20.3  | 32  |
| N/A: not applicable                                                                                                                                                |              |         |         |       |       |     |
| <sup>(1)</sup> C <sub>max</sub> (ng/mL) and AUC (ng·hour/mL) values normalized to 1 mg/kg dose.                                                                    |              |         |         |       |       |     |
| <sup>(2)</sup> C <sub>max</sub> , metabolite / C <sub>max</sub> , parent; <sup>(3)</sup> AUC <sub>0-t(last)</sub> , metabolite / AUC <sub>0-t(last)</sub> , parent |              |         |         |       |       |     |

Fexinidazole  
Toxicokinetic Report for the study No. 0504-2007

**Table 5.** Day 14 individual and mean ( $\pm$ SD, %CV) pharmacokinetic parameters of Fexinidazole and metabolites after oral 50 mg/kg/day of Fexinidazole in male Sprague Dawley rats.

| Parameter (Units)                                                                                                                                                  | ID 2838      | ID 2839 | ID 2840 | Mean  | SD    | %CV |
|--------------------------------------------------------------------------------------------------------------------------------------------------------------------|--------------|---------|---------|-------|-------|-----|
|                                                                                                                                                                    | Fexinidazole |         |         |       |       |     |
| C <sub>max</sub> (ng/mL)                                                                                                                                           | 79           | 42.2    | 65.8    | 62.3  | 18.6  | 30  |
| t <sub>max</sub> (hour)                                                                                                                                            | 4            | 2       | 1       | 2.33  | 1.53  | 66  |
| AUC <sub>0-t(last)</sub> Interval (hour)                                                                                                                           | 0-8          | 0-8     | 0-8     | N/A   | N/A   | N/A |
| AUC <sub>0-t(last)</sub> (ng·hour/mL)                                                                                                                              | 441          | 204     | 389     | 345   | 125   | 36  |
| C <sub>max</sub> , norm <sup>(1)</sup>                                                                                                                             | 1.58         | 0.844   | 1.32    | 1.25  | 0.373 | 30  |
| AUC <sub>0-t(last)</sub> , norm <sup>(1)</sup>                                                                                                                     | 8.83         | 4.07    | 7.78    | 6.89  | 2.5   | 36  |
| RA,C <sub>max</sub>                                                                                                                                                | 2.23         | 1.74    | 1.16    | 1.71  | 0.535 | 31  |
| RA,AUC <sub>0-t(last)</sub>                                                                                                                                        | 2.4          | 2.69    | 1.42    | 2.17  | 0.666 | 31  |
|                                                                                                                                                                    | Sulfoxide    |         |         |       |       |     |
| C <sub>max</sub> (ng/mL)                                                                                                                                           | 2820         | 1830    | 2150    | 2267  | 505   | 22  |
| t <sub>max</sub> (hour)                                                                                                                                            | 4            | 2       | 1       | 2.33  | 1.53  | 66  |
| AUC <sub>0-t(last)</sub> Interval (hour)                                                                                                                           | 0-8          | 0-8     | 0-24    | N/A   | N/A   | N/A |
| AUC <sub>0-t(last)</sub> (ng·hour/mL)                                                                                                                              | 15300        | 7870    | 14400   | 12500 | 4050  | 32  |
| C <sub>max</sub> , norm <sup>(1)</sup>                                                                                                                             | 56.4         | 36.6    | 43      | 45.3  | 10.1  | 22  |
| AUC <sub>0-t(last)</sub> , norm <sup>(1)</sup>                                                                                                                     | 306          | 157     | 287     | 250   | 81.1  | 32  |
| <sup>(2)</sup>                                                                                                                                                     | 33.8         | 41      | 30.9    | 35.2  | 5.21  | 15  |
| <sup>(3)</sup>                                                                                                                                                     | 32.8         | 36.5    | 35      | 34.8  | 1.85  | 5   |
| RA,C <sub>max</sub>                                                                                                                                                | 1.94         | 1.63    | 1.11    | 1.56  | 0.423 | 27  |
| RA,AUC <sub>0-t(last)</sub>                                                                                                                                        | 1.93         | 1.53    | 1.46    | 1.64  | 0.253 | 15  |
|                                                                                                                                                                    | Sulfone      |         |         |       |       |     |
| C <sub>max</sub> (ng/mL)                                                                                                                                           | 5110         | 4120    | 5090    | 4773  | 566   | 12  |
| t <sub>max</sub> (hour)                                                                                                                                            | 4            | 4       | 4       | 4     | 0     | 0   |
| AUC <sub>0-t(last)</sub> Interval (hour)                                                                                                                           | 0-24         | 0-24    | 0-24    | N/A   | N/A   | N/A |
| AUC <sub>0-t(last)</sub> (ng·hour/mL)                                                                                                                              | 73900        | 51400   | 63100   | 62800 | 11300 | 18  |
| C <sub>max</sub> , norm <sup>(1)</sup>                                                                                                                             | 102          | 82.4    | 102     | 95.5  | 11.3  | 12  |
| AUC <sub>0-t(last)</sub> , norm <sup>(1)</sup>                                                                                                                     | 1480         | 1030    | 1260    | 1260  | 225   | 18  |
| <sup>(2)</sup>                                                                                                                                                     | 58           | 87.6    | 69.4    | 71.7  | 14.9  | 21  |
| <sup>(3)</sup>                                                                                                                                                     | 150          | 226     | 146     | 174   | 45.2  | 26  |
| RA,C <sub>max</sub>                                                                                                                                                | 3.48         | 4.12    | 2.86    | 3.49  | 0.63  | 18  |
| RA,AUC <sub>0-t(last)</sub>                                                                                                                                        | 3.75         | 9.21    | 2.6     | 5.19  | 3.53  | 68  |
| N/A: not applicable                                                                                                                                                |              |         |         |       |       |     |
| <sup>(1)</sup> C <sub>max</sub> (ng/mL) and AUC (ng·hour/mL) values normalized to 1 mg/kg dose.                                                                    |              |         |         |       |       |     |
| <sup>(2)</sup> C <sub>max</sub> , metabolite / C <sub>max</sub> , parent; <sup>(3)</sup> AUC <sub>0-t(last)</sub> , metabolite / AUC <sub>0-t(last)</sub> , parent |              |         |         |       |       |     |

Fexinidazole  
Toxicokinetic Report for the study No. 0504-2007

**Table 6.** Day 14 individual and mean ( $\pm$ SD, %CV) pharmacokinetic parameters of Fexinidazole and metabolites after oral 50 mg/kg/day of Fexinidazole in female Sprague Dawley rats.

| Parameter (Units)                                                                                                                                                  | ID 2850      | ID 2851 | ID 2852 | Mean   | SD    | %CV |
|--------------------------------------------------------------------------------------------------------------------------------------------------------------------|--------------|---------|---------|--------|-------|-----|
|                                                                                                                                                                    | Fexinidazole |         |         |        |       |     |
| C <sub>max</sub> (ng/mL)                                                                                                                                           | 292          | 395     | 213     | 300    | 91.3  | 30  |
| t <sub>max</sub> (hour)                                                                                                                                            | 2            | 0.5     | 2       | 1.5    | 0.866 | 58  |
| AUC <sub>0-t(last)</sub> Interval (hour)                                                                                                                           | 0-8          | 0-8     | 0-8     | N/A    | N/A   | N/A |
| AUC <sub>0-t(last)</sub> (ng·hour/mL)                                                                                                                              | 1480         | 1290    | 1160    | 1310   | 161   | 12  |
| C <sub>max</sub> , norm <sup>(1)</sup>                                                                                                                             | 5.84         | 7.9     | 4.26    | 6      | 1.83  | 30  |
| AUC <sub>0-t(last)</sub> , norm <sup>(1)</sup>                                                                                                                     | 29.7         | 25.8    | 23.3    | 26.3   | 3.23  | 12  |
| RA,C <sub>max</sub>                                                                                                                                                | 1.6          | 2.35    | 2.23    | 2.06   | 0.4   | 19  |
| RA,AUC <sub>0-t(last)</sub>                                                                                                                                        | 1.61         | 1.75    | 1.87    | 1.74   | 0.135 | 8   |
|                                                                                                                                                                    | Sulfoxide    |         |         |        |       |     |
| C <sub>max</sub> (ng/mL)                                                                                                                                           | 8750         | 7720    | 8120    | 8197   | 519   | 6   |
| t <sub>max</sub> (hour)                                                                                                                                            | 2            | 2       | 2       | 2      | 0     | 0   |
| AUC <sub>0-t(last)</sub> Interval (hour)                                                                                                                           | 0-8          | 0-8     | 0-8     | N/A    | N/A   | N/A |
| AUC <sub>0-t(last)</sub> (ng·hour/mL)                                                                                                                              | 52600        | 43100   | 45600   | 47100  | 4920  | 11  |
| C <sub>max</sub> , norm <sup>(1)</sup>                                                                                                                             | 175          | 154     | 162     | 164    | 10.6  | 7   |
| AUC <sub>0-t(last)</sub> , norm <sup>(1)</sup>                                                                                                                     | 1050         | 863     | 912     | 942    | 97    | 10  |
| <sup>(2)</sup>                                                                                                                                                     | 28.3         | 18.5    | 36.1    | 27.6   | 8.81  | 32  |
| <sup>(3)</sup>                                                                                                                                                     | 33.6         | 31.6    | 37.2    | 34.1   | 2.83  | 8   |
| RA,C <sub>max</sub>                                                                                                                                                | 1.94         | 1.95    | 2.54    | 2.14   | 0.343 | 16  |
| RA,AUC <sub>0-t(last)</sub>                                                                                                                                        | 1.8          | 2.01    | 2.4     | 2.07   | 0.303 | 15  |
|                                                                                                                                                                    | Sulfone      |         |         |        |       |     |
| C <sub>max</sub> (ng/mL)                                                                                                                                           | 10000        | 5500    | 8440    | 7980   | 2285  | 29  |
| t <sub>max</sub> (hour)                                                                                                                                            | 8            | 8       | 8       | 8      | 0     | 0   |
| AUC <sub>0-t(last)</sub> Interval (hour)                                                                                                                           | 0-24         | 0-24    | 0-24    | N/A    | N/A   | N/A |
| AUC <sub>0-t(last)</sub> (ng·hour/mL)                                                                                                                              | 138000       | 89200   | 122000  | 116000 | 24900 | 21  |
| C <sub>max</sub> , norm <sup>(1)</sup>                                                                                                                             | 200          | 110     | 169     | 160    | 45.7  | 29  |
| AUC <sub>0-t(last)</sub> , norm <sup>(1)</sup>                                                                                                                     | 2770         | 1780    | 2440    | 2330   | 504   | 22  |
| <sup>(2)</sup>                                                                                                                                                     | 30.7         | 12.5    | 35.6    | 26.3   | 12.2  | 46  |
| <sup>(3)</sup>                                                                                                                                                     | 83.7         | 62      | 94.4    | 80     | 16.5  | 21  |
| RA,C <sub>max</sub>                                                                                                                                                | 1.39         | 1.94    | 2.61    | 1.98   | 0.612 | 31  |
| RA,AUC <sub>0-t(last)</sub>                                                                                                                                        | 1.57         | 2.38    | 2.93    | 2.29   | 0.684 | 30  |
| N/A: not applicable                                                                                                                                                |              |         |         |        |       |     |
| <sup>(1)</sup> C <sub>max</sub> (ng/mL) and AUC (ng·hour/mL) values normalized to 1 mg/kg dose.                                                                    |              |         |         |        |       |     |
| <sup>(2)</sup> C <sub>max</sub> , metabolite / C <sub>max</sub> , parent; <sup>(3)</sup> AUC <sub>0-t(last)</sub> , metabolite / AUC <sub>0-t(last)</sub> , parent |              |         |         |        |       |     |

Fexinidazole  
Toxicokinetic Report for the study No. 0504-2007

**Table 7.** Day 28 individual and mean ( $\pm$ SD, %CV) pharmacokinetic parameters of Fexinidazole and metabolites after oral 50 mg/kg/day of Fexinidazole in male Sprague Dawley rats.

| Parameter (Units)                              | ID 2838      | ID 2839 | ID 2840 | Mean  | SD    | %CV |
|------------------------------------------------|--------------|---------|---------|-------|-------|-----|
|                                                | Fexinidazole |         |         |       |       |     |
| C <sub>max</sub> (ng/mL)                       | 148          | 105     | 145     | 133   | 24    | 18  |
| t <sub>max</sub> (hour)                        | 4            | 4       | 4       | 4     | 0     | 0   |
| AUC <sub>0-t(last)</sub> (ng·hour/mL)          | 859          | 619     | 1190    | 889   | 287   | 32  |
| Regr. Range (hour)                             | 4-8          | 4-8     | 4-24    | N/A   | N/A   | N/A |
| t <sub>1/2,z</sub> (hour)                      | 3.36         | 5.49    | 5.24    | 4.7   | 1.16  | 25  |
| C <sub>max, norm</sub> <sup>(1)</sup>          | 2.96         | 2.1     | 2.9     | 2.65  | 0.48  | 18  |
| AUC <sub>0-t(last)</sub> , norm <sup>(1)</sup> | 17.2         | 12.4    | 23.8    | 17.8  | 5.72  | 32  |
| RA,C <sub>max</sub>                            | 4.17         | 4.32    | 2.55    | 3.68  | 0.983 | 27  |
| RA,AUC <sub>0-t(last)</sub>                    | 4.67         | 8.17    | 4.34    | 5.73  | 2.12  | 37  |
|                                                | Sulfoxide    |         |         |       |       |     |
| C <sub>max</sub> (ng/mL)                       | 4820         | 3770    | 5000    | 4530  | 664   | 15  |
| t <sub>max</sub> (hour)                        | 4            | 2       | 4       | 3.33  | 1.15  | 35  |
| AUC <sub>0-24</sub> (ng·hour/mL)               | 27200        | 21900   | 39300   | 29467 | 8919  | 30  |
| AUC <sub>0-t(last)</sub> (ng·hour/mL)          | 27200        | 21900   | 42800   | 30600 | 10900 | 36  |
| Regr. Range (hour)                             | 4-8          | 2-8     | 4-48    | N/A   | N/A   | N/A |
| t <sub>1/2,z</sub> (hour)                      | 2.63         | 6.11    | 6.23    | 4.99  | 2.04  | 41  |
| C <sub>max, norm</sub> <sup>(1)</sup>          | 96.4         | 75.4    | 100     | 90.6  | 13.3  | 15  |
| AUC <sub>0-24</sub> , norm <sup>(1)</sup>      | 545          | 438     | 786     | 590   | 178   | 30  |
| AUC <sub>0-t(last)</sub> , norm <sup>(1)</sup> | 545          | 438     | 855     | 613   | 217   | 35  |
| <sup>(2)</sup>                                 | 30.8         | 34      | 32.6    | 32.5  | 1.58  | 5   |
| <sup>(3)</sup>                                 | 29.9         | 33.5    | 34      | 32.5  | 2.21  | 7   |
| RA,C <sub>max</sub>                            | 3.32         | 3.37    | 2.58    | 3.09  | 0.444 | 14  |
| RA,AUC <sub>0-24</sub>                         | 3.43         | 4.25    | 3.98    | 3.89  | 0.421 | 11  |
| RA,AUC <sub>0-t(last)</sub>                    | 3.43         | 4.25    | 4.33    | 4     | 0.502 | 13  |

Fexinidazole  
 Toxicokinetic Report for the study No. 0504-2007

**Table 7.** (cont'd). Day 28 individual and mean ( $\pm$ SD, %CV) pharmacokinetic parameters of Fexinidazole and metabolites after oral 50 mg/kg/day of Fexinidazole in male Sprague Dawley rats.

| Parameter (Units)                                                                                                                                                                                                                                                                             | ID 2838 | ID 2839 | ID 2840 | Mean   | SD    | %CV |
|-----------------------------------------------------------------------------------------------------------------------------------------------------------------------------------------------------------------------------------------------------------------------------------------------|---------|---------|---------|--------|-------|-----|
|                                                                                                                                                                                                                                                                                               | Sulfone |         |         |        |       |     |
| C <sub>max</sub> (ng/mL)                                                                                                                                                                                                                                                                      | 7260    | 7280    | 8710    | 7750   | 831   | 11  |
| t <sub>max</sub> (hour)                                                                                                                                                                                                                                                                       | 8       | 8       | 4       | 6.67   | 2.31  | 35  |
| AUC <sub>0-24</sub> (ng·hour/mL)                                                                                                                                                                                                                                                              | 103000  | 98800   | 117000  | 106267 | 9530  | 9   |
| AUC <sub>0-t(last)</sub> (ng·hour/mL)                                                                                                                                                                                                                                                         | 110000  | 101000  | 128000  | 113000 | 13700 | 12  |
| Regr. Range (hour)                                                                                                                                                                                                                                                                            | 8-48    | 8-48    | 4-48    | N/A    | N/A   | N/A |
| t <sub>1/2,z</sub> (hour)                                                                                                                                                                                                                                                                     | 5.97    | 5.08    | 7.36    | 6.14   | 1.15  | 19  |
| C <sub>max, norm</sub> <sup>(1)</sup>                                                                                                                                                                                                                                                         | 145     | 146     | 174     | 155    | 16.5  | 11  |
| AUC <sub>0-24, norm</sub> <sup>(1)</sup>                                                                                                                                                                                                                                                      | 2060    | 1976    | 2340    | 2125   | 191   | 9   |
| AUC <sub>0-t(last), norm</sub> <sup>(1)</sup>                                                                                                                                                                                                                                                 | 2200    | 2020    | 2550    | 2260   | 270   | 12  |
| <sup>(2)</sup>                                                                                                                                                                                                                                                                                | 44      | 62.2    | 53.9    | 53.4   | 9.11  | 17  |
| <sup>(3)</sup>                                                                                                                                                                                                                                                                                | 115     | 146     | 96.5    | 119    | 25.2  | 21  |
| RA,C <sub>max</sub>                                                                                                                                                                                                                                                                           | 4.94    | 7.28    | 4.89    | 5.7    | 1.37  | 24  |
| RA,AUC <sub>0-24</sub>                                                                                                                                                                                                                                                                        | 5.23    | 17.7    | 4.81    | 9.25   | 7.33  | 79  |
| RA,AUC <sub>0-t(last)</sub>                                                                                                                                                                                                                                                                   | 5.58    | 18.1    | 5.27    | 9.65   | 7.32  | 76  |
| N/A: not applicable;<br><sup>(1)</sup> C <sub>max</sub> (ng/mL) and AUC (ng·hour/mL) values normalized to 1 mg/kg dose.<br><sup>(2)</sup> C <sub>max, metabolite</sub> / C <sub>max, parent</sub> ;<br><sup>(3)</sup> AUC <sub>0-t(last), metabolite</sub> / AUC <sub>0-t(last), parent</sub> |         |         |         |        |       |     |

Fexinidazole  
Toxicokinetic Report for the study No. 0504-2007

**Table 8.** Day 28 individual and mean ( $\pm$ SD, %CV) pharmacokinetic parameters of Fexinidazole and metabolites after oral 50 mg/kg/day of Fexinidazole in female Sprague Dawley rats.

| Parameter (Units)                             | ID 2850      | ID 2851 | ID 2852 | Mean  | SD    | %CV |
|-----------------------------------------------|--------------|---------|---------|-------|-------|-----|
|                                               | Fexinidazole |         |         |       |       |     |
| C <sub>max</sub> (ng/mL)                      | 216          | 214     | 835     | 422   | 358   | 85  |
| t <sub>max</sub> (hour)                       | 1            | 1       | 1       | 1     | 0     | 0   |
| AUC <sub>0-24</sub> (ng·hour/mL)              | 1060         | 1640    | 1640    | 1447  | 335   | 23  |
| AUC <sub>0-t(last)</sub> (ng·hour/mL)         | 1060         | 2200    | 1640    | 1630  | 570   | 35  |
| Regr. Range (hour)                            | 4-8          | 4-48    | 1-8     | N/A   | N/A   | N/A |
| t <sub>1/2,z</sub> (hour)                     | 2.44         | 11      | 1.78    | 5.07  | 5.14  | 101 |
| C <sub>max, norm</sub> <sup>(1)</sup>         | 4.32         | 4.28    | 16.7    | 8.43  | 7.16  | 85  |
| AUC <sub>0-24, norm</sub> <sup>(1)</sup>      | 21.2         | 32.8    | 32.8    | 28.9  | 6.7   | 23  |
| AUC <sub>0-t(last), norm</sub> <sup>(1)</sup> | 21.2         | 44      | 32.7    | 32.6  | 11.4  | 35  |
| RA,C <sub>max</sub>                           | 1.19         | 1.27    | 8.73    | 3.73  | 4.33  | 116 |
| RA,AUC <sub>0-24</sub>                        | 1.15         | 2.23    | 2.65    | 2.01  | 0.773 | 38  |
| RA,AUC <sub>0-t(last)</sub>                   | 1.15         | 2.99    | 2.65    | 2.26  | 0.977 | 43  |
|                                               | Sulfoxide    |         |         |       |       |     |
| C <sub>max</sub> (ng/mL)                      | 6420         | 8920    | 18900   | 11413 | 6603  | 58  |
| t <sub>max</sub> (hour)                       | 2            | 1       | 1       | 1.33  | 0.577 | 43  |
| AUC <sub>0-24</sub> (ng·hour/mL)              | 39600        | 70700   | 51200   | 53833 | 15716 | 29  |
| AUC <sub>0-t(last)</sub> (ng·hour/mL)         | 87100        | 95700   | 51200   | 78000 | 23600 | 30  |
| Regr. Range (hour)                            | 2-48         | 8-72    | 1-8     | N/A   | N/A   | N/A |
| t <sub>1/2,z</sub> (hour)                     | 6.43         | 9.77    | 2.18    | 6.13  | 3.8   | 62  |
| C <sub>max, norm</sub> <sup>(1)</sup>         | 128          | 178     | 378     | 228   | 132   | 58  |
| AUC <sub>0-24, norm</sub> <sup>(1)</sup>      | 792          | 1414    | 1020    | 1075  | 315   | 29  |
| AUC <sub>0-t(last), norm</sub> <sup>(1)</sup> | 1740         | 1910    | 1020    | 1560  | 472   | 30  |
| <sup>(2)</sup>                                | 28.1         | 39.4    | 21.4    | 29.6  | 9.11  | 31  |
| <sup>(3)</sup>                                | 77.7         | 41.1    | 29.5    | 49.5  | 25.1  | 51  |
| RA,C <sub>max</sub>                           | 1.42         | 2.25    | 5.91    | 3.19  | 2.39  | 75  |
| RA,AUC <sub>0-24</sub>                        | 1.36         | 3.3     | 2.69    | 2.45  | 0.996 | 41  |
| RA,AUC <sub>0-t(last)</sub>                   | 2.98         | 4.47    | 2.69    | 3.38  | 0.954 | 28  |

Fexinidazole  
Toxicokinetic Report for the study No. 0504-2007

**Table 8.** (cont'd). Day 28 individual and mean ( $\pm$ SD, %CV) pharmacokinetic parameters of Fexinidazole and metabolites after oral 50 mg/kg/day of Fexinidazole in female Sprague Dawley rats.

| Parameter (Units)                                                                               | ID 2850 | ID 2851 | ID 2852 | Mean   | SD    | %CV |
|-------------------------------------------------------------------------------------------------|---------|---------|---------|--------|-------|-----|
|                                                                                                 | Sulfone |         |         |        |       |     |
| C <sub>max</sub> (ng/mL)                                                                        | 10700   | 11400   | 10000   | 10700  | 700   | 7   |
| t <sub>max</sub> (hour)                                                                         | 8       | 8       | 4       | 6.67   | 2.31  | 35  |
| AUC <sub>0-24</sub> (ng·hour/mL)                                                                | 146000  | 221000  | 157000  | 174667 | 40501 | 23  |
| AUC <sub>0-t(last)</sub> (ng·hour/mL)                                                           | 158000  | 254000  | 178000  | 197000 | 50600 | 26  |
| Regr. Range (hour)                                                                              | 8-48    | 8-72    | 4-48    | N/A    | N/A   | N/A |
| t <sub>1/2,z</sub> (hour)                                                                       | 6.23    | 23.8    | 7.45    | 12.5   | 9.81  | 79  |
| C <sub>max, norm</sub> <sup>(1)</sup>                                                           | 214     | 228     | 200     | 214    | 14    | 7   |
| AUC <sub>0-24, norm</sub> <sup>(1)</sup>                                                        | 2920    | 4420    | 3140    | 3493   | 810   | 23  |
| AUC <sub>0-t(last), norm</sub> <sup>(1)</sup>                                                   | 3150    | 5070    | 3560    | 3930   | 1010  | 26  |
| <sup>(2)</sup>                                                                                  | 44.4    | 47.8    | 10.7    | 34.3   | 20.5  | 60  |
| <sup>(3)</sup>                                                                                  | 134     | 104     | 97.4    | 112    | 19.4  | 17  |
| RA,C <sub>max</sub>                                                                             | 1.49    | 4.03    | 3.1     | 2.87   | 1.28  | 45  |
| RA,AUC <sub>0-24</sub>                                                                          | 1.66    | 5.89    | 3.76    | 3.77   | 2.12  | 56  |
| RA,AUC <sub>0-t(last)</sub>                                                                     | 1.79    | 6.77    | 4.27    | 4.28   | 2.49  | 58  |
| N/A: not applicable;                                                                            |         |         |         |        |       |     |
| <sup>(1)</sup> C <sub>max</sub> (ng/mL) and AUC (ng·hour/mL) values normalized to 1 mg/kg dose; |         |         |         |        |       |     |
| <sup>(2)</sup> C <sub>max, metabolite</sub> / C <sub>max, parent</sub> ;                        |         |         |         |        |       |     |
| <sup>(3)</sup> AUC <sub>0-t(last), metabolite</sub> / AUC <sub>0-t(last), parent</sub>          |         |         |         |        |       |     |



Fexinidazole  
Toxicokinetic Report for the study No. 0504-2007

**Table 9.** Day 1 individual and mean ( $\pm$ SD, %CV) pharmacokinetic parameters of Fexinidazole and metabolites after oral 200 mg/kg/day of Fexinidazole in male Sprague Dawley rats.

| Parameter (Units)                                                                                                                                               | ID 2841      | ID 2842 | ID 2843 | Mean   | SD    | %CV |
|-----------------------------------------------------------------------------------------------------------------------------------------------------------------|--------------|---------|---------|--------|-------|-----|
|                                                                                                                                                                 | Fexinidazole |         |         |        |       |     |
| C <sub>max</sub> (ng/mL)                                                                                                                                        | 176          | 256     | 63      | 165    | 97    | 59  |
| t <sub>max</sub> (hour)                                                                                                                                         | 2            | 2       | 1       | 1.67   | 0.577 | 35  |
| AUC <sub>0-t(last)</sub> Interval (hour)                                                                                                                        | 0-24         | 0-8     | 0-8     | N/A    | N/A   | N/A |
| AUC <sub>0-t(last)</sub> (ng·hour/mL)                                                                                                                           | 1700         | 1330    | 332     | 1120   | 708   | 63  |
| C <sub>max, norm</sub> <sup>(1)</sup>                                                                                                                           | 0.88         | 1.28    | 0.315   | 0.825  | 0.485 | 59  |
| AUC <sub>0-t(last), norm</sub> <sup>(1)</sup>                                                                                                                   | 8.52         | 6.65    | 1.66    | 5.61   | 3.55  | 63  |
|                                                                                                                                                                 | Sulfoxide    |         |         |        |       |     |
| C <sub>max</sub> (ng/mL)                                                                                                                                        | 7950         | 9810    | 12200   | 9987   | 2131  | 21  |
| t <sub>max</sub> (hour)                                                                                                                                         | 2            | 2       | 2       | 2      | 0     | 0   |
| AUC <sub>0-t(last)</sub> Interval (hour)                                                                                                                        | 0-24         | 0-24    | 0-8     | N/A    | N/A   | N/A |
| AUC <sub>0-t(last)</sub> (ng·hour/mL)                                                                                                                           | 85000        | 80100   | 76400   | 80500  | 4310  | 5   |
| C <sub>max, norm</sub> <sup>(1)</sup>                                                                                                                           | 39.8         | 49.1    | 61      | 50     | 10.6  | 21  |
| AUC <sub>0-t(last), norm</sub> <sup>(1)</sup>                                                                                                                   | 425          | 400     | 382     | 402    | 21.6  | 5   |
| <sup>(2)</sup>                                                                                                                                                  | 42.7         | 36.2    | 183     | 87.4   | 83    | 95  |
| <sup>(3)</sup>                                                                                                                                                  | 47.3         | 57      | 218     | 107    | 95.7  | 89  |
|                                                                                                                                                                 | Sulfone      |         |         |        |       |     |
| C <sub>max</sub> (ng/mL)                                                                                                                                        | 6600         | 7950    | 11100   | 8550   | 2309  | 27  |
| t <sub>max</sub> (hour)                                                                                                                                         | 8            | 8       | 8       | 8      | 0     | 0   |
| AUC <sub>0-t(last)</sub> Interval (hour)                                                                                                                        | 0-24         | 0-24    | 0-24    | N/A    | N/A   | N/A |
| AUC <sub>0-t(last)</sub> (ng·hour/mL)                                                                                                                           | 106000       | 106000  | 144000  | 119000 | 21900 | 19  |
| C <sub>max, norm</sub> <sup>(1)</sup>                                                                                                                           | 33           | 39.8    | 55.5    | 42.8   | 11.5  | 27  |
| AUC <sub>0-t(last), norm</sub> <sup>(1)</sup>                                                                                                                   | 529          | 531     | 720     | 593    | 110   | 19  |
| <sup>(2)</sup>                                                                                                                                                  | 33.6         | 27.9    | 158     | 73.2   | 73.6  | 101 |
| <sup>(3)</sup>                                                                                                                                                  | 55.9         | 71.5    | 389     | 172    | 188   | 109 |
| N/A: not applicable                                                                                                                                             |              |         |         |        |       |     |
| <sup>(1)</sup> C <sub>max</sub> (ng/mL) and AUC (ng·hour/mL) values normalized to 1 mg/kg dose.                                                                 |              |         |         |        |       |     |
| <sup>(2)</sup> C <sub>max, metabolite</sub> / C <sub>max, parent</sub> ; <sup>(3)</sup> AUC <sub>0-t(last), metabolite</sub> / AUC <sub>0-t(last), parent</sub> |              |         |         |        |       |     |

Fexinidazole  
Toxicokinetic Report for the study No. 0504-2007

**Table 10.** Day 1 individual and mean ( $\pm$ SD, %CV) pharmacokinetic parameters of Fexinidazole and metabolites after oral 200 mg/kg/day of Fexinidazole in female Sprague Dawley rats.

| Parameter (Units)                                                                                                                                               | ID 2853      | ID 2854 | ID 2855 | Mean   | SD    | %CV |
|-----------------------------------------------------------------------------------------------------------------------------------------------------------------|--------------|---------|---------|--------|-------|-----|
|                                                                                                                                                                 | Fexinidazole |         |         |        |       |     |
| C <sub>max</sub> (ng/mL)                                                                                                                                        | 830          | 569     | 412     | 604    | 211   | 35  |
| t <sub>max</sub> (hour)                                                                                                                                         | 2            | 4       | 0.5     | 2.17   | 1.76  | 81  |
| AUC <sub>0-t(last)</sub> Interval (hour)                                                                                                                        | 0-8          | 0-8     | 0-8     | N/A    | N/A   | N/A |
| AUC <sub>0-t(last)</sub> (ng·hour/mL)                                                                                                                           | 3850         | 3520    | 2230    | 3200   | 856   | 27  |
| C <sub>max, norm</sub> <sup>(1)</sup>                                                                                                                           | 4.15         | 2.85    | 2.06    | 3.02   | 1.06  | 35  |
| AUC <sub>0-t(last), norm</sub> <sup>(1)</sup>                                                                                                                   | 19.2         | 17.6    | 11.2    | 16     | 4.23  | 27  |
|                                                                                                                                                                 | Sulfoxide    |         |         |        |       |     |
| C <sub>max</sub> (ng/mL)                                                                                                                                        | 13400        | 13500   | 11500   | 12800  | 1127  | 9   |
| t <sub>max</sub> (hour)                                                                                                                                         | 2            | 4       | 2       | 2.67   | 1.15  | 43  |
| AUC <sub>0-t(last)</sub> Interval (hour)                                                                                                                        | 0-8          | 0-8     | 0-24    | N/A    | N/A   | N/A |
| AUC <sub>0-t(last)</sub> (ng·hour/mL)                                                                                                                           | 82000        | 78100   | 114000  | 91400  | 19700 | 22  |
| C <sub>max, norm</sub> <sup>(1)</sup>                                                                                                                           | 67           | 67.5    | 57.5    | 64     | 5.63  | 9   |
| AUC <sub>0-t(last), norm</sub> <sup>(1)</sup>                                                                                                                   | 410          | 390     | 572     | 457    | 99.8  | 22  |
| <sup>(2)</sup>                                                                                                                                                  | 15.3         | 22.4    | 26.4    | 21.4   | 5.64  | 26  |
| <sup>(3)</sup>                                                                                                                                                  | 20.1         | 21      | 48.4    | 29.8   | 16    | 54  |
|                                                                                                                                                                 | Sulfone      |         |         |        |       |     |
| C <sub>max</sub> (ng/mL)                                                                                                                                        | 9290         | 9880    | 10900   | 10023  | 815   | 8   |
| t <sub>max</sub> (hour)                                                                                                                                         | 8            | 8       | 8       | 8      | 0     | 0   |
| AUC <sub>0-t(last)</sub> Interval (hour)                                                                                                                        | 0-24         | 0-24    | 0-24    | N/A    | N/A   | N/A |
| AUC <sub>0-t(last)</sub> (ng·hour/mL)                                                                                                                           | 126000       | 129000  | 146000  | 134000 | 10800 | 8   |
| C <sub>max, norm</sub> <sup>(1)</sup>                                                                                                                           | 46.5         | 49.4    | 54.5    | 50.1   | 4.05  | 8   |
| AUC <sub>0-t(last), norm</sub> <sup>(1)</sup>                                                                                                                   | 628          | 643     | 728     | 666    | 53.9  | 8   |
| <sup>(2)</sup>                                                                                                                                                  | 10           | 15.6    | 23.7    | 16.5   | 6.89  | 42  |
| <sup>(3)</sup>                                                                                                                                                  | 29.4         | 32.9    | 58.7    | 40.3   | 16    | 40  |
| N/A: not applicable                                                                                                                                             |              |         |         |        |       |     |
| <sup>(1)</sup> C <sub>max</sub> (ng/mL) and AUC (ng·hour/mL) values normalized to 1 mg/kg dose.                                                                 |              |         |         |        |       |     |
| <sup>(2)</sup> C <sub>max, metabolite</sub> / C <sub>max, parent</sub> ; <sup>(3)</sup> AUC <sub>0-t(last), metabolite</sub> / AUC <sub>0-t(last), parent</sub> |              |         |         |        |       |     |

Fexinidazole  
Toxicokinetic Report for the study No. 0504-2007

**Table 11.** Day 14 individual and mean ( $\pm$ SD, %CV) pharmacokinetic parameters of Fexinidazole and metabolites after oral 200 mg/kg/day of Fexinidazole in male Sprague Dawley rats.

| Parameter (Units)                                                                                                                                                  | ID 2841      | ID 2842 | ID 2843 | Mean   | SD    | %CV |
|--------------------------------------------------------------------------------------------------------------------------------------------------------------------|--------------|---------|---------|--------|-------|-----|
|                                                                                                                                                                    | Fexinidazole |         |         |        |       |     |
| C <sub>max</sub> (ng/mL)                                                                                                                                           | 355          | 381     | 87.2    | 274    | 163   | 59  |
| t <sub>max</sub> (hour)                                                                                                                                            | 2            | 4       | 2       | 2.67   | 1.15  | 43  |
| AUC <sub>0-t(last)</sub> Interval (hour)                                                                                                                           | 0-24         | 0-8     | 0-8     | N/A    | N/A   | N/A |
| AUC <sub>0-t(last)</sub> (ng·hour/mL)                                                                                                                              | 3410         | 2240    | 388     | 2010   | 1520  | 76  |
| C <sub>max</sub> , norm <sup>(1)</sup>                                                                                                                             | 1.78         | 1.91    | 0.436   | 1.38   | 0.816 | 59  |
| AUC <sub>0-t(last)</sub> , norm <sup>(1)</sup>                                                                                                                     | 17.1         | 11.2    | 1.94    | 10.1   | 7.64  | 76  |
| RA, C <sub>max</sub>                                                                                                                                               | 2.02         | 1.49    | 1.38    | 1.63   | 0.339 | 21  |
| RA, AUC <sub>0-t(last)</sub>                                                                                                                                       | 2.01         | 1.68    | 1.17    | 1.62   | 0.422 | 26  |
|                                                                                                                                                                    | Sulfoxide    |         |         |        |       |     |
| C <sub>max</sub> (ng/mL)                                                                                                                                           | 12600        | 14300   | 12400   | 13100  | 1044  | 8   |
| t <sub>max</sub> (hour)                                                                                                                                            | 2            | 4       | 4       | 3.33   | 1.15  | 35  |
| AUC <sub>0-t(last)</sub> Interval (hour)                                                                                                                           | 0-24         | 0-8     | 0-8     | N/A    | N/A   | N/A |
| AUC <sub>0-t(last)</sub> (ng·hour/mL)                                                                                                                              | 125000       | 80800   | 75100   | 93600  | 27300 | 29  |
| C <sub>max</sub> , norm <sup>(1)</sup>                                                                                                                             | 63           | 71.5    | 62      | 65.5   | 5.22  | 8   |
| AUC <sub>0-t(last)</sub> , norm <sup>(1)</sup>                                                                                                                     | 627          | 404     | 376     | 469    | 138   | 29  |
| <sup>(2)</sup>                                                                                                                                                     | 33.6         | 35.5    | 134     | 67.9   | 57.7  | 85  |
| <sup>(3)</sup>                                                                                                                                                     | 34.7         | 34.1    | 183     | 84     | 85.8  | 102 |
| RA, C <sub>max</sub>                                                                                                                                               | 1.58         | 1.46    | 1.02    | 1.35   | 0.298 | 22  |
| RA, AUC <sub>0-t(last)</sub>                                                                                                                                       | 1.47         | 1.01    | 0.983   | 1.15   | 0.274 | 24  |
|                                                                                                                                                                    | Sulfone      |         |         |        |       |     |
| C <sub>max</sub> (ng/mL)                                                                                                                                           | 19700        | 19900   | 16800   | 18800  | 1735  | 9   |
| t <sub>max</sub> (hour)                                                                                                                                            | 8            | 8       | 4       | 6.67   | 2.31  | 35  |
| AUC <sub>0-t(last)</sub> Interval (hour)                                                                                                                           | 0-24         | 0-24    | 0-24    | N/A    | N/A   | N/A |
| AUC <sub>0-t(last)</sub> (ng·hour/mL)                                                                                                                              | 301000       | 273000  | 230000  | 268000 | 35800 | 13  |
| C <sub>max</sub> , norm <sup>(1)</sup>                                                                                                                             | 98.5         | 99.5    | 84      | 94     | 8.67  | 9   |
| AUC <sub>0-t(last)</sub> , norm <sup>(1)</sup>                                                                                                                     | 1510         | 1370    | 1150    | 1340   | 181   | 14  |
| <sup>(2)</sup>                                                                                                                                                     | 49.8         | 46.9    | 173     | 89.8   | 71.9  | 80  |
| <sup>(3)</sup>                                                                                                                                                     | 79.2         | 109     | 532     | 240    | 253   | 105 |
| RA, C <sub>max</sub>                                                                                                                                               | 2.98         | 2.5     | 1.51    | 2.33   | 0.75  | 32  |
| RA, AUC <sub>0-t(last)</sub>                                                                                                                                       | 2.84         | 2.58    | 1.6     | 2.34   | 0.655 | 28  |
| N/A: not applicable                                                                                                                                                |              |         |         |        |       |     |
| <sup>(1)</sup> C <sub>max</sub> (ng/mL) and AUC (ng·hour/mL) values normalized to 1 mg/kg dose.                                                                    |              |         |         |        |       |     |
| <sup>(2)</sup> C <sub>max</sub> , metabolite / C <sub>max</sub> , parent; <sup>(3)</sup> AUC <sub>0-t(last)</sub> , metabolite / AUC <sub>0-t(last)</sub> , parent |              |         |         |        |       |     |

Fexinidazole  
Toxicokinetic Report for the study No. 0504-2007

**Table 12.** Day 14 individual and mean ( $\pm$ SD, %CV) pharmacokinetic parameters of Fexinidazole and metabolites after oral 200 mg/kg/day of Fexinidazole in female Sprague Dawley rats.

| Parameter (Units)                                                                                                                                               | ID 2853      | ID 2854 | ID 2855 | Mean   | SD     | %CV |
|-----------------------------------------------------------------------------------------------------------------------------------------------------------------|--------------|---------|---------|--------|--------|-----|
|                                                                                                                                                                 | Fexinidazole |         |         |        |        |     |
| C <sub>max</sub> (ng/mL)                                                                                                                                        | 891          | 746     | 683     | 773    | 107    | 14  |
| t <sub>max</sub> (hour)                                                                                                                                         | 2            | 0.5     | 2       | 1.5    | 0.866  | 58  |
| AUC <sub>0-t(last)</sub> Interval (hour)                                                                                                                        | 0-8          | 0-8     | 0-8     | N/A    | N/A    | N/A |
| AUC <sub>0-t(last)</sub> (ng·hour/mL)                                                                                                                           | 4240         | 4050    | 3810    | 4030   | 215    | 5   |
| C <sub>max, norm</sub> <sup>(1)</sup>                                                                                                                           | 4.46         | 3.73    | 3.42    | 3.87   | 0.534  | 14  |
| AUC <sub>0-t(last), norm</sub> <sup>(1)</sup>                                                                                                                   | 21.2         | 20.3    | 19.1    | 20.2   | 1.05   | 5   |
| RA, C <sub>max</sub>                                                                                                                                            | 1.07         | 1.31    | 1.66    | 1.35   | 0.294  | 22  |
| RA, AUC <sub>0-t(last)</sub>                                                                                                                                    | 1.1          | 1.15    | 1.71    | 1.32   | 0.337  | 26  |
|                                                                                                                                                                 | Sulfoxide    |         |         |        |        |     |
| C <sub>max</sub> (ng/mL)                                                                                                                                        | 20000        | 17600   | 18100   | 18567  | 1266   | 7   |
| t <sub>max</sub> (hour)                                                                                                                                         | 2            | 4       | 4       | 3.33   | 1.15   | 35  |
| AUC <sub>0-t(last)</sub> Interval (hour)                                                                                                                        | 0-8          | 0-8     | 0-24    | N/A    | N/A    | N/A |
| AUC <sub>0-t(last)</sub> (ng·hour/mL)                                                                                                                           | 127000       | 119000  | 183000  | 143000 | 34900  | 24  |
| C <sub>max, norm</sub> <sup>(1)</sup>                                                                                                                           | 100          | 88      | 90.5    | 92.8   | 6.33   | 7   |
| AUC <sub>0-t(last), norm</sub> <sup>(1)</sup>                                                                                                                   | 635          | 595     | 917     | 716    | 176    | 25  |
| <sup>(2)</sup>                                                                                                                                                  | 21.2         | 22.3    | 25.1    | 22.9   | 1.98   | 9   |
| <sup>(3)</sup>                                                                                                                                                  | 28.3         | 27.8    | 45.4    | 33.8   | 10     | 30  |
| RA, C <sub>max</sub>                                                                                                                                            | 1.49         | 1.3     | 1.57    | 1.46   | 0.139  | 10  |
| RA, AUC <sub>0-t(last)</sub>                                                                                                                                    | 1.55         | 1.52    | 1.61    | 1.56   | 0.0418 | 3   |
|                                                                                                                                                                 | Sulfone      |         |         |        |        |     |
| C <sub>max</sub> (ng/mL)                                                                                                                                        | 20700        | 19600   | 24300   | 21533  | 2458   | 11  |
| t <sub>max</sub> (hour)                                                                                                                                         | 8            | 8       | 8       | 8      | 0      | 0   |
| AUC <sub>0-t(last)</sub> Interval (hour)                                                                                                                        | 0-24         | 0-24    | 0-24    | N/A    | N/A    | N/A |
| AUC <sub>0-t(last)</sub> (ng·hour/mL)                                                                                                                           | 277000       | 302000  | 339000  | 306000 | 31200  | 10  |
| C <sub>max, norm</sub> <sup>(1)</sup>                                                                                                                           | 104          | 98      | 122     | 108    | 12.5   | 12  |
| AUC <sub>0-t(last), norm</sub> <sup>(1)</sup>                                                                                                                   | 1390         | 1510    | 1690    | 1530   | 151    | 10  |
| <sup>(2)</sup>                                                                                                                                                  | 20.8         | 23.6    | 31.9    | 25.4   | 5.77   | 23  |
| <sup>(3)</sup>                                                                                                                                                  | 58.6         | 66.9    | 79.8    | 68.4   | 10.7   | 16  |
| RA, C <sub>max</sub>                                                                                                                                            | 2.23         | 1.98    | 2.23    | 2.15   | 0.141  | 7   |
| RA, AUC <sub>0-t(last)</sub>                                                                                                                                    | 2.2          | 2.34    | 2.32    | 2.29   | 0.0774 | 3   |
| N/A: not applicable                                                                                                                                             |              |         |         |        |        |     |
| <sup>(1)</sup> C <sub>max</sub> (ng/mL) and AUC (ng·hour/mL) values normalized to 1 mg/kg dose.                                                                 |              |         |         |        |        |     |
| <sup>(2)</sup> C <sub>max, metabolite</sub> / C <sub>max, parent</sub> ; <sup>(3)</sup> AUC <sub>0-t(last), metabolite</sub> / AUC <sub>0-t(last), parent</sub> |              |         |         |        |        |     |

Fexinidazole  
Toxicokinetic Report for the study No. 0504-2007

**Table 13.** Day 28 individual and mean ( $\pm$ SD, %CV) pharmacokinetic parameters of Fexinidazole and metabolites after oral 200 mg/kg/day of Fexinidazole in male Sprague Dawley rats.

| Parameter (Units)                             | ID 2841      | ID 2842 | ID 2843 | Mean   | SD      | %CV |
|-----------------------------------------------|--------------|---------|---------|--------|---------|-----|
|                                               | Fexinidazole |         |         |        |         |     |
| C <sub>max</sub> (ng/mL)                      | 311          | 353     | 100     | 255    | 136     | 53  |
| t <sub>max</sub> (hour)                       | 1            | 4       | 2       | 2.33   | 1.53    | 66  |
| AUC <sub>0-24</sub> (ng·hour/mL)              | 4100         | 2290    | 587     | 2326   | 1757    | 76  |
| AUC <sub>0-t(last)</sub> (ng·hour/mL)         | 4100         | 8530    | 587     | 4410   | 3980    | 90  |
| Regr. Range (hour)                            | 1-24         | 4-48    | 2-8     | N/A    | N/A     | N/A |
| t <sub>1/2,z</sub> (hour)                     | 12.6         | 10.3    | 3.34    | 8.75   | 4.82    | 55  |
| C <sub>max, norm</sub> <sup>(1)</sup>         | 1.56         | 1.77    | 0.5     | 1.28   | 0.681   | 53  |
| AUC <sub>0-24, norm</sub> <sup>(1)</sup>      | 20.5         | 11.5    | 2.94    | 11.6   | 8.78    | 76  |
| AUC <sub>0-t(last), norm</sub> <sup>(1)</sup> | 20.5         | 42.6    | 2.94    | 22     | 19.9    | 90  |
| RA,C <sub>max</sub>                           | 1.77         | 1.38    | 1.59    | 1.58   | 0.194   | 12  |
| RA,AUC <sub>0-24</sub>                        | 2.41         | 1.72    | 1.77    | 1.97   | 0.386   | 20  |
| RA,AUC <sub>0-t(last)</sub>                   | 2.41         | 6.41    | 1.77    | 3.53   | 2.52    | 71  |
|                                               | Sulfoxide    |         |         |        |         |     |
| C <sub>max</sub> (ng/mL)                      | 9300         | 11500   | 14100   | 11633  | 2403    | 21  |
| t <sub>max</sub> (hour)                       | 2            | 4       | 4       | 3.33   | 1.15    | 35  |
| AUC <sub>0-24</sub> (ng·hour/mL)              | 137000       | 141000  | 88300   | 122100 | 29340   | 24  |
| AUC <sub>0-t(last)</sub> (ng·hour/mL)         | 176000       | 150000  | 88300   | 138000 | 45000   | 33  |
| Regr. Range (hour)                            | 4-48         | 4-48    | 4-8     | N/A    | N/A     | N/A |
| t <sub>1/2,z</sub> (hour)                     | 5.86         | 9.31    | 3.57    | 6.25   | 2.89    | 46  |
| C <sub>max, norm</sub> <sup>(1)</sup>         | 46.5         | 57.5    | 70.5    | 58.2   | 12      | 21  |
| AUC <sub>0-24, norm</sub> <sup>(1)</sup>      | 685          | 705     | 441     | 610    | 147     | 24  |
| AUC <sub>0-t(last), norm</sub> <sup>(1)</sup> | 880          | 749     | 441     | 690    | 225     | 33  |
| <sup>(2)</sup>                                | 28.3         | 30.8    | 133     | 64.2   | 59.9    | 93  |
| <sup>(3)</sup>                                | 40.6         | 16.6    | 142     | 66.5   | 66.7    | 100 |
| RA,C <sub>max</sub>                           | 1.17         | 1.17    | 1.16    | 1.17   | 0.00892 | 1   |
| RA,AUC <sub>0-24</sub>                        | 1.61         | 1.76    | 1.16    | 1.51   | 0.315   | 21  |
| RA,AUC <sub>0-t(last)</sub>                   | 2.07         | 1.87    | 1.16    | 1.7    | 0.481   | 28  |

Fexinidazole  
Toxicokinetic Report for the study No. 0504-2007

**Table 13.** (cont'd). Day 28 individual and mean ( $\pm$ SD, %CV) pharmacokinetic parameters of Fexinidazole and metabolites after oral 200 mg/kg/day of Fexinidazole in male Sprague Dawley rats.

| Parameter (Units)                                                                               | ID 2841 | ID 2842 | ID 2843 | Mean   | SD    | %CV |
|-------------------------------------------------------------------------------------------------|---------|---------|---------|--------|-------|-----|
|                                                                                                 | Sulfone |         |         |        |       |     |
| C <sub>max</sub> (ng/mL)                                                                        | 22200   | 22700   | 27700   | 24200  | 3041  | 13  |
| t <sub>max</sub> (hour)                                                                         | 8       | 8       | 8       | 8      | 0     | 0   |
| AUC <sub>0-24</sub> (ng·hour/mL)                                                                | 344000  | 301000  | 379000  | 341333 | 39068 | 11  |
| AUC <sub>0-t(last)</sub> (ng·hour/mL)                                                           | 420000  | 352000  | 388000  | 387000 | 34000 | 9   |
| Regr. Range (hour)                                                                              | 8-72    | 8-72    | 8-48    | N/A    | N/A   | N/A |
| t <sub>1/2,z</sub> (hour)                                                                       | 7.58    | 9.93    | 5.06    | 7.52   | 2.44  | 32  |
| C <sub>max, norm</sub> <sup>(1)</sup>                                                           | 111     | 114     | 139     | 121    | 15.4  | 13  |
| AUC <sub>0-24, norm</sub> <sup>(1)</sup>                                                        | 1720    | 1505    | 1895    | 1707   | 195   | 11  |
| AUC <sub>0-t(last), norm</sub> <sup>(1)</sup>                                                   | 2100    | 1760    | 1940    | 1930   | 170   | 9   |
| <sup>(2)</sup>                                                                                  | 64      | 57.7    | 249     | 123    | 108   | 88  |
| <sup>(3)</sup>                                                                                  | 91.9    | 37      | 593     | 241    | 306   | 127 |
| RA,C <sub>max</sub>                                                                             | 3.36    | 2.86    | 2.5     | 2.9    | 0.436 | 15  |
| RA,AUC <sub>0-24</sub>                                                                          | 3.25    | 2.84    | 2.63    | 2.91   | 0.312 | 11  |
| RA,AUC <sub>0-t(last)</sub>                                                                     | 3.96    | 3.32    | 2.69    | 3.33   | 0.634 | 19  |
| N/A: not applicable;                                                                            |         |         |         |        |       |     |
| <sup>(1)</sup> C <sub>max</sub> (ng/mL) and AUC (ng·hour/mL) values normalized to 1 mg/kg dose; |         |         |         |        |       |     |
| <sup>(2)</sup> C <sub>max, metabolite</sub> / C <sub>max, parent</sub> ;                        |         |         |         |        |       |     |
| <sup>(3)</sup> AUC <sub>0-t(last), metabolite</sub> / AUC <sub>0-t(last), parent</sub>          |         |         |         |        |       |     |

Fexinidazole  
Toxicokinetic Report for the study No. 0504-2007

**Table 14.** Day 28 individual and mean ( $\pm$ SD, %CV) pharmacokinetic parameters of Fexinidazole and metabolites after oral 200 mg/kg/day of Fexinidazole in female Sprague Dawley rats.

| Parameter (Units)                             | ID 2853      | ID 2854 | ID 2855 | Mean   | SD     | %CV |
|-----------------------------------------------|--------------|---------|---------|--------|--------|-----|
|                                               | Fexinidazole |         |         |        |        |     |
| C <sub>max</sub> (ng/mL)                      | 943          | 962     | 803     | 903    | 86.8   | 10  |
| t <sub>max</sub> (hour)                       | 2            | 2       | 1       | 1.67   | 0.577  | 35  |
| AUC <sub>0-24</sub> (ng·hour/mL)              | 5030         | 4160    | 4120    | 4437   | 514    | 12  |
| AUC <sub>0-t(last)</sub> (ng·hour/mL)         | 5030         | 4160    | 5050    | 4750   | 508    | 11  |
| Regr. Range (hour)                            | 2-8          | 2-8     | 8-48    | N/A    | N/A    | N/A |
| t <sub>1/2,z</sub> (hour)                     | 4.22         | 3.24    | 11.5    | 6.32   | 4.51   | 71  |
| C <sub>max, norm</sub> <sup>(1)</sup>         | 4.72         | 4.81    | 4.02    | 4.52   | 0.432  | 10  |
| AUC <sub>0-24, norm</sub> <sup>(1)</sup>      | 25.1         | 20.8    | 20.6    | 22.2   | 2.54   | 11  |
| AUC <sub>0-t(last), norm</sub> <sup>(1)</sup> | 25.1         | 20.8    | 25.3    | 23.7   | 2.54   | 11  |
| RA,C <sub>max</sub>                           | 1.14         | 1.69    | 1.95    | 1.59   | 0.415  | 26  |
| RA,AUC <sub>0-24</sub>                        | 1.31         | 1.18    | 1.85    | 1.45   | 0.354  | 24  |
| RA,AUC <sub>0-t(last)</sub>                   | 1.31         | 1.18    | 2.26    | 1.58   | 0.592  | 37  |
|                                               | Sulfoxide    |         |         |        |        |     |
| C <sub>max</sub> (ng/mL)                      | 21200        | 21800   | 24000   | 22333  | 1474   | 7   |
| t <sub>max</sub> (hour)                       | 2            | 2       | 1       | 1.67   | 0.577  | 35  |
| AUC <sub>0-24</sub> (ng·hour/mL)              | 141000       | 123000  | 151000  | 138333 | 14189  | 10  |
| AUC <sub>0-t(last)</sub> (ng·hour/mL)         | 141000       | 123000  | 194000  | 153000 | 36900  | 24  |
| Regr. Range (hour)                            | 4-8          | 2-8     | 4-48    | N/A    | N/A    | N/A |
| t <sub>1/2,z</sub> (hour)                     | 6.88         | 5.74    | 11.6    | 8.07   | 3.11   | 39  |
| C <sub>max, norm</sub> <sup>(1)</sup>         | 106          | 109     | 120     | 112    | 7.37   | 7   |
| AUC <sub>0-24, norm</sub> <sup>(1)</sup>      | 703          | 613     | 755     | 690    | 71.8   | 10  |
| AUC <sub>0-t(last), norm</sub> <sup>(1)</sup> | 703          | 613     | 968     | 761    | 185    | 24  |
| <sup>(2)</sup>                                | 21.3         | 21.4    | 28.3    | 23.7   | 4      | 17  |
| <sup>(3)</sup>                                | 26.5         | 28      | 36.3    | 30.3   | 5.3    | 18  |
| RA,C <sub>max</sub>                           | 1.58         | 1.61    | 2.09    | 1.76   | 0.283  | 16  |
| RA,AUC <sub>0-24</sub>                        | 1.72         | 1.57    | 1.32    | 1.54   | 0.2    | 13  |
| RA,AUC <sub>0-t(last)</sub>                   | 1.72         | 1.57    | 1.7     | 1.67   | 0.0789 | 5   |

Fexinidazole  
Toxicokinetic Report for the study No. 0504-2007

**Table 14.** (cont'd). Day 28 individual and mean ( $\pm$ SD, %CV) pharmacokinetic parameters of Fexinidazole and metabolites after oral 200 mg/kg/day of Fexinidazole in female Sprague Dawley rats.

| Parameter (Units)                                                                               | ID 2853 | ID 2854 | ID 2855 | Mean   | SD     | %CV |
|-------------------------------------------------------------------------------------------------|---------|---------|---------|--------|--------|-----|
|                                                                                                 | Sulfone |         |         |        |        |     |
| C <sub>max</sub> (ng/mL)                                                                        | 26200   | 19700   | 18400   | 21433  | 4179   | 20  |
| t <sub>max</sub> (hour)                                                                         | 8       | 8       | 8       | 8      | 0      | 0   |
| AUC <sub>0-24</sub> (ng·hour/mL)                                                                | 405000  | 273000  | 346000  | 341333 | 66124  | 19  |
| AUC <sub>0-t(last)</sub> (ng·hour/mL)                                                           | 507000  | 294000  | 544000  | 448000 | 135000 | 30  |
| Regr. Range (hour)                                                                              | 8-72    | 8-48    | 8-72    | N/A    | N/A    | N/A |
| t <sub>1/2,z</sub> (hour)                                                                       | 6.48    | 5.15    | 10.2    | 7.28   | 2.62   | 36  |
| C <sub>max, norm</sub> <sup>(1)</sup>                                                           | 131     | 98.5    | 92      | 107    | 20.9   | 20  |
| AUC <sub>0-24, norm</sub> <sup>(1)</sup>                                                        | 2025    | 1365    | 1730    | 1707   | 331    | 19  |
| AUC <sub>0-t(last), norm</sub> <sup>(1)</sup>                                                   | 2530    | 1470    | 2720    | 2240   | 674    | 30  |
| <sup>(2)</sup>                                                                                  | 24.9    | 18.4    | 20.6    | 21.3   | 3.34   | 16  |
| <sup>(3)</sup>                                                                                  | 90.4    | 63.4    | 96.6    | 83.5   | 17.7   | 21  |
| RA,C <sub>max</sub>                                                                             | 2.82    | 1.99    | 1.69    | 2.17   | 0.586  | 27  |
| RA,AUC <sub>0-24</sub>                                                                          | 3.21    | 2.12    | 2.37    | 2.57   | 0.575  | 22  |
| RA,AUC <sub>0-t(last)</sub>                                                                     | 4.02    | 2.28    | 3.73    | 3.34   | 0.933  | 28  |
| N/A: not applicable;                                                                            |         |         |         |        |        |     |
| <sup>(1)</sup> C <sub>max</sub> (ng/mL) and AUC (ng·hour/mL) values normalized to 1 mg/kg dose; |         |         |         |        |        |     |
| <sup>(2)</sup> C <sub>max, metabolite</sub> / C <sub>max, parent</sub> ;                        |         |         |         |        |        |     |
| <sup>(3)</sup> AUC <sub>0-t(last), metabolite</sub> / AUC <sub>0-t(last), parent</sub> .        |         |         |         |        |        |     |



Fexinidazole  
Toxicokinetic Report for the study No. 0504-2007

**Table 15.** Day 1 individual and mean ( $\pm$ SD, %CV) pharmacokinetic parameters of Fexinidazole and metabolites after oral 800 mg/kg/day of Fexinidazole in male Sprague Dawley rats.

| Parameter (Units)                                                                                                                                                  | ID 2844 | ID 2845 | ID 2846 | Mean   | SD     | %CV |
|--------------------------------------------------------------------------------------------------------------------------------------------------------------------|---------|---------|---------|--------|--------|-----|
| Fexinidazole                                                                                                                                                       |         |         |         |        |        |     |
| C <sub>max</sub> (ng/mL)                                                                                                                                           | 805     | 868     | 2760    | 1478   | 1111   | 75  |
| t <sub>max</sub> (hour)                                                                                                                                            | 2       | 2       | 0.5     | 1.5    | 0.866  | 58  |
| AUC <sub>0-t(last)</sub> Interval (hour)                                                                                                                           | 0-24    | 0-24    | 0-8     | N/A    | N/A    | N/A |
| AUC <sub>0-t(last)</sub> (ng·hour/mL)                                                                                                                              | 8770    | 8750    | 12500   | 10000  | 2160   | 22  |
| C <sub>max</sub> , norm <sup>(1)</sup>                                                                                                                             | 1.01    | 1.09    | 3.45    | 1.85   | 1.39   | 75  |
| AUC <sub>0-t(last)</sub> , norm <sup>(1)</sup>                                                                                                                     | 11      | 10.9    | 15.6    | 12.5   | 2.69   | 22  |
| Sulfoxide                                                                                                                                                          |         |         |         |        |        |     |
| C <sub>max</sub> (ng/mL)                                                                                                                                           | 36500   | 27200   | 34800   | 32833  | 4952   | 15  |
| t <sub>max</sub> (hour)                                                                                                                                            | 4       | 4       | 8       | 5.33   | 2.31   | 43  |
| AUC <sub>0-t(last)</sub> Interval (hour)                                                                                                                           | 0-24    | 0-24    | 0-8     | N/A    | N/A    | N/A |
| AUC <sub>0-t(last)</sub> (ng·hour/mL)                                                                                                                              | 462000  | 394000  | 242000  | 366000 | 113000 | 31  |
| C <sub>max</sub> , norm <sup>(1)</sup>                                                                                                                             | 45.6    | 34      | 43.5    | 41     | 6.18   | 15  |
| AUC <sub>0-t(last)</sub> , norm <sup>(1)</sup>                                                                                                                     | 577     | 493     | 302     | 457    | 141    | 31  |
| <sup>(2)</sup>                                                                                                                                                     | 42.9    | 29.6    | 11.9    | 28.1   | 15.5   | 55  |
| <sup>(3)</sup>                                                                                                                                                     | 49.8    | 42.6    | 18.3    | 36.9   | 16.5   | 45  |
| Sulfone                                                                                                                                                            |         |         |         |        |        |     |
| C <sub>max</sub> (ng/mL)                                                                                                                                           | 39500   | 42100   | 39300   | 40300  | 1562   | 4   |
| t <sub>max</sub> (hour)                                                                                                                                            | 8       | 8       | 8       | 8      | 0      | 0   |
| AUC <sub>0-t(last)</sub> Interval (hour)                                                                                                                           | 0-24    | 0-24    | 0-8     | N/A    | N/A    | N/A |
| AUC <sub>0-t(last)</sub> (ng·hour/mL)                                                                                                                              | 613000  | 621000  | 160000  | 465000 | 264000 | 57  |
| C <sub>max</sub> , norm <sup>(1)</sup>                                                                                                                             | 49.4    | 52.6    | 49.1    | 50.4   | 1.94   | 4   |
| AUC <sub>0-t(last)</sub> , norm <sup>(1)</sup>                                                                                                                     | 766     | 777     | 200     | 581    | 330    | 57  |
| <sup>(2)</sup>                                                                                                                                                     | 44      | 43.5    | 12.8    | 33.4   | 17.9   | 54  |
| <sup>(3)</sup>                                                                                                                                                     | 62.7    | 63.7    | 11.5    | 46     | 29.9   | 65  |
| N/A: not applicable                                                                                                                                                |         |         |         |        |        |     |
| <sup>(1)</sup> C <sub>max</sub> (ng/mL) and AUC (ng·hour/mL) values normalized to 1 mg/kg dose.                                                                    |         |         |         |        |        |     |
| <sup>(2)</sup> C <sub>max</sub> , metabolite / C <sub>max</sub> , parent; <sup>(3)</sup> AUC <sub>0-t(last)</sub> , metabolite / AUC <sub>0-t(last)</sub> , parent |         |         |         |        |        |     |

Fexinidazole  
Toxicokinetic Report for the study No. 0504-2007

**Table 16.** Day 1 individual and mean ( $\pm$ SD, %CV) pharmacokinetic parameters of Fexinidazole and metabolites after oral 800 mg/kg/day of Fexinidazole in female Sprague Dawley rats.

| Parameter (Units)                                                                                                                                               | ID 2856      | ID 2857 | ID 2858 | Mean   | SD     | %CV |
|-----------------------------------------------------------------------------------------------------------------------------------------------------------------|--------------|---------|---------|--------|--------|-----|
|                                                                                                                                                                 | Fexinidazole |         |         |        |        |     |
| C <sub>max</sub> (ng/mL)                                                                                                                                        | 1690         | 1290    | 1470    | 1483   | 200    | 14  |
| t <sub>max</sub> (hour)                                                                                                                                         | 2            | 2       | 1       | 1.67   | 0.577  | 35  |
| AUC <sub>0-t(last)</sub> Interval (hour)                                                                                                                        | 0-24         | 0-24    | 0-24    | N/A    | N/A    | N/A |
| AUC <sub>0-t(last)</sub> (ng·hour/mL)                                                                                                                           | 16700        | 18700   | 11700   | 15700  | 3610   | 23  |
| C <sub>max, norm</sub> <sup>(1)</sup>                                                                                                                           | 2.11         | 1.61    | 1.84    | 1.85   | 0.25   | 14  |
| AUC <sub>0-t(last), norm</sub> <sup>(1)</sup>                                                                                                                   | 20.9         | 23.4    | 14.6    | 19.6   | 4.53   | 23  |
|                                                                                                                                                                 | Sulfoxide    |         |         |        |        |     |
| C <sub>max</sub> (ng/mL)                                                                                                                                        | 28200        | 30300   | 33400   | 30633  | 2616   | 9   |
| t <sub>max</sub> (hour)                                                                                                                                         | 4            | 4       | 4       | 4      | 0      | 0   |
| AUC <sub>0-t(last)</sub> Interval (hour)                                                                                                                        | 0-24         | 0-24    | 0-24    | N/A    | N/A    | N/A |
| AUC <sub>0-t(last)</sub> (ng·hour/mL)                                                                                                                           | 408000       | 551000  | 401000  | 453000 | 84700  | 19  |
| C <sub>max, norm</sub> <sup>(1)</sup>                                                                                                                           | 35.3         | 37.9    | 41.8    | 38.3   | 3.27   | 9   |
| AUC <sub>0-t(last), norm</sub> <sup>(1)</sup>                                                                                                                   | 510          | 689     | 501     | 567    | 106    | 19  |
| <sup>(2)</sup>                                                                                                                                                  | 15.8         | 22.2    | 21.5    | 19.8   | 3.52   | 18  |
| <sup>(3)</sup>                                                                                                                                                  | 23.1         | 27.9    | 32.4    | 27.8   | 4.65   | 17  |
|                                                                                                                                                                 | Sulfone      |         |         |        |        |     |
| C <sub>max</sub> (ng/mL)                                                                                                                                        | 29400        | 67600   | 37500   | 44833  | 20128  | 45  |
| t <sub>max</sub> (hour)                                                                                                                                         | 8            | 24      | 8       | 13.3   | 9.24   | 69  |
| AUC <sub>0-t(last)</sub> Interval (hour)                                                                                                                        | 0-24         | 0-24    | 0-24    | N/A    | N/A    | N/A |
| AUC <sub>0-t(last)</sub> (ng·hour/mL)                                                                                                                           | 542000       | 961000  | 545000  | 683000 | 241000 | 35  |
| C <sub>max, norm</sub> <sup>(1)</sup>                                                                                                                           | 36.8         | 84.5    | 46.9    | 56.1   | 25.1   | 45  |
| AUC <sub>0-t(last), norm</sub> <sup>(1)</sup>                                                                                                                   | 678          | 1200    | 681     | 853    | 301    | 35  |
| <sup>(2)</sup>                                                                                                                                                  | 15.6         | 47      | 22.9    | 28.5   | 16.4   | 58  |
| <sup>(3)</sup>                                                                                                                                                  | 29.1         | 46.1    | 41.8    | 39     | 8.83   | 23  |
| N/A: not applicable                                                                                                                                             |              |         |         |        |        |     |
| <sup>(1)</sup> C <sub>max</sub> (ng/mL) and AUC (ng·hour/mL) values normalized to 1 mg/kg dose.                                                                 |              |         |         |        |        |     |
| <sup>(2)</sup> C <sub>max, metabolite</sub> / C <sub>max, parent</sub> ; <sup>(3)</sup> AUC <sub>0-t(last), metabolite</sub> / AUC <sub>0-t(last), parent</sub> |              |         |         |        |        |     |

Fexinidazole  
Toxicokinetic Report for the study No. 0504-2007

**Table 17.** Day 14 individual and mean ( $\pm$ SD, %CV) pharmacokinetic parameters of Fexinidazole and metabolites after oral 800 mg/kg/day of Fexinidazole in male Sprague Dawley rats.

| Parameter (Units)                                                                                                                                               | ID 2844      | ID 2845 | ID 2846 | Mean   | SD     | %CV |
|-----------------------------------------------------------------------------------------------------------------------------------------------------------------|--------------|---------|---------|--------|--------|-----|
|                                                                                                                                                                 | Fexinidazole |         |         |        |        |     |
| C <sub>max</sub> (ng/mL)                                                                                                                                        | 678          | 551     | 467     | 565    | 106    | 19  |
| t <sub>max</sub> (hour)                                                                                                                                         | 4            | 2       | 4       | 3.33   | 1.15   | 35  |
| AUC <sub>0-t(last)</sub> Interval (hour)                                                                                                                        | 0-24         | 0-24    | 0-24    | N/A    | N/A    | N/A |
| AUC <sub>0-t(last)</sub> (ng·hour/mL)                                                                                                                           | 6890         | 4240    | 4220    | 5120   | 1540   | 30  |
| C <sub>max, norm</sub> <sup>(1)</sup>                                                                                                                           | 0.848        | 0.689   | 0.584   | 0.707  | 0.133  | 19  |
| AUC <sub>0-t(last), norm</sub> <sup>(1)</sup>                                                                                                                   | 8.61         | 5.3     | 5.27    | 6.39   | 1.92   | 30  |
| RA, C <sub>max</sub>                                                                                                                                            | 0.842        | 0.635   | 0.169   | 0.549  | 0.345  | 63  |
| RA, AUC <sub>0-t(last)</sub>                                                                                                                                    | 0.786        | 0.485   | 0.338   | 0.536  | 0.228  | 43  |
|                                                                                                                                                                 | Sulfoxide    |         |         |        |        |     |
| C <sub>max</sub> (ng/mL)                                                                                                                                        | 17800        | 19400   | 16000   | 17733  | 1701   | 10  |
| t <sub>max</sub> (hour)                                                                                                                                         | 4            | 2       | 4       | 3.33   | 1.15   | 35  |
| AUC <sub>0-t(last)</sub> Interval (hour)                                                                                                                        | 0-24         | 0-24    | 0-24    | N/A    | N/A    | N/A |
| AUC <sub>0-t(last)</sub> (ng·hour/mL)                                                                                                                           | 195000       | 137000  | 163000  | 165000 | 29100  | 18  |
| C <sub>max, norm</sub> <sup>(1)</sup>                                                                                                                           | 22.3         | 24.3    | 20      | 22.2   | 2.15   | 10  |
| AUC <sub>0-t(last), norm</sub> <sup>(1)</sup>                                                                                                                   | 244          | 171     | 203     | 206    | 36.6   | 18  |
| <sup>(2)</sup>                                                                                                                                                  | 24.8         | 33.3    | 32.4    | 30.2   | 4.65   | 15  |
| <sup>(3)</sup>                                                                                                                                                  | 26.8         | 30.6    | 36.5    | 31.3   | 4.92   | 16  |
| RA, C <sub>max</sub>                                                                                                                                            | 0.488        | 0.713   | 0.46    | 0.554  | 0.139  | 25  |
| RA, AUC <sub>0-t(last)</sub>                                                                                                                                    | 0.422        | 0.348   | 0.674   | 0.481  | 0.171  | 35  |
|                                                                                                                                                                 | Sulfone      |         |         |        |        |     |
| C <sub>max</sub> (ng/mL)                                                                                                                                        | 32700        | 29300   | 30500   | 30833  | 1724   | 6   |
| t <sub>max</sub> (hour)                                                                                                                                         | 8            | 4       | 4       | 5.33   | 2.31   | 43  |
| AUC <sub>0-t(last)</sub> Interval (hour)                                                                                                                        | 0-24         | 0-24    | 0-24    | N/A    | N/A    | N/A |
| AUC <sub>0-t(last)</sub> (ng·hour/mL)                                                                                                                           | 493000       | 352000  | 423000  | 423000 | 70500  | 17  |
| C <sub>max, norm</sub> <sup>(1)</sup>                                                                                                                           | 40.9         | 36.6    | 38.1    | 38.5   | 2.18   | 6   |
| AUC <sub>0-t(last), norm</sub> <sup>(1)</sup>                                                                                                                   | 616          | 440     | 529     | 528    | 88     | 17  |
| <sup>(2)</sup>                                                                                                                                                  | 43.3         | 47.7    | 58.6    | 49.9   | 7.89   | 16  |
| <sup>(3)</sup>                                                                                                                                                  | 64.2         | 74.5    | 89.9    | 76.2   | 13     | 17  |
| RA, C <sub>max</sub>                                                                                                                                            | 0.828        | 0.696   | 0.776   | 0.767  | 0.0664 | 9   |
| RA, AUC <sub>0-t(last)</sub>                                                                                                                                    | 0.804        | 0.567   | 2.64    | 1.34   | 1.14   | 85  |
| N/A: not applicable                                                                                                                                             |              |         |         |        |        |     |
| <sup>(1)</sup> C <sub>max</sub> (ng/mL) and AUC (ng·hour/mL) values normalized to 1 mg/kg dose.                                                                 |              |         |         |        |        |     |
| <sup>(2)</sup> C <sub>max, metabolite</sub> / C <sub>max, parent</sub> ; <sup>(3)</sup> AUC <sub>0-t(last), metabolite</sub> / AUC <sub>0-t(last), parent</sub> |              |         |         |        |        |     |

Fexinidazole  
Toxicokinetic Report for the study No. 0504-2007

**Table 18.** Day 14 individual and mean ( $\pm$ SD, %CV) pharmacokinetic parameters of Fexinidazole and metabolites after oral 800 mg/kg/day of Fexinidazole in female Sprague Dawley rats.

| Parameter (Units)                                                                                                                                                  | ID 2856      | ID 2857 | ID 2858 | Mean   | SD     | %CV |
|--------------------------------------------------------------------------------------------------------------------------------------------------------------------|--------------|---------|---------|--------|--------|-----|
|                                                                                                                                                                    | Fexinidazole |         |         |        |        |     |
| C <sub>max</sub> (ng/mL)                                                                                                                                           | 624          | 1070    | 2740    | 1478   | 1115   | 76  |
| t <sub>max</sub> (hour)                                                                                                                                            | 0.5          | 8       | 0.5     | 3      | 4.33   | 144 |
| AUC <sub>0-t(last)</sub> Interval (hour)                                                                                                                           | 0-24         | 0-24    | 0-8     | N/A    | N/A    | N/A |
| AUC <sub>0-t(last)</sub> (ng·hour/mL)                                                                                                                              | 9380         | 16300   | 14700   | 13500  | 3620   | 27  |
| C <sub>max</sub> , norm <sup>(1)</sup>                                                                                                                             | 0.78         | 1.34    | 3.43    | 1.85   | 1.4    | 76  |
| AUC <sub>0-t(last)</sub> , norm <sup>(1)</sup>                                                                                                                     | 11.7         | 20.4    | 18.4    | 16.8   | 4.56   | 27  |
| RA, C <sub>max</sub>                                                                                                                                               | 0.369        | 0.829   | 1.86    | 1.02   | 0.766  | 75  |
| RA, AUC <sub>0-t(last)</sub>                                                                                                                                       | 0.562        | 0.872   | 1.26    | 0.897  | 0.348  | 39  |
|                                                                                                                                                                    | Sulfoxide    |         |         |        |        |     |
| C <sub>max</sub> (ng/mL)                                                                                                                                           | 25100        | 34000   | 37600   | 32233  | 6435   | 20  |
| t <sub>max</sub> (hour)                                                                                                                                            | 2            | 2       | 2       | 2      | 0      | 0   |
| AUC <sub>0-t(last)</sub> Interval (hour)                                                                                                                           | 0-24         | 0-24    | 0-8     | N/A    | N/A    | N/A |
| AUC <sub>0-t(last)</sub> (ng·hour/mL)                                                                                                                              | 365000       | 560000  | 244000  | 390000 | 159000 | 41  |
| C <sub>max</sub> , norm <sup>(1)</sup>                                                                                                                             | 31.4         | 42.5    | 47      | 40.3   | 8.03   | 20  |
| AUC <sub>0-t(last)</sub> , norm <sup>(1)</sup>                                                                                                                     | 456          | 700     | 305     | 487    | 199    | 41  |
| <sup>(2)</sup>                                                                                                                                                     | 38           | 30.1    | 13      | 27     | 12.8   | 47  |
| <sup>(3)</sup>                                                                                                                                                     | 36.8         | 32.5    | 15.7    | 28.3   | 11.2   | 39  |
| RA, C <sub>max</sub>                                                                                                                                               | 0.89         | 1.12    | 1.13    | 1.05   | 0.135  | 13  |
| RA, AUC <sub>0-t(last)</sub>                                                                                                                                       | 0.895        | 1.02    | 0.608   | 0.84   | 0.209  | 25  |
|                                                                                                                                                                    | Sulfone      |         |         |        |        |     |
| C <sub>max</sub> (ng/mL)                                                                                                                                           | 38500        | 61800   | 50400   | 50233  | 11651  | 23  |
| t <sub>max</sub> (hour)                                                                                                                                            | 8            | 8       | 8       | 8      | 0      | 0   |
| AUC <sub>0-t(last)</sub> Interval (hour)                                                                                                                           | 0-24         | 0-24    | 0-8     | N/A    | N/A    | N/A |
| AUC <sub>0-t(last)</sub> (ng·hour/mL)                                                                                                                              | 674000       | 990000  | 327000  | 664000 | 332000 | 50  |
| C <sub>max</sub> , norm <sup>(1)</sup>                                                                                                                             | 48.1         | 77.3    | 63      | 62.8   | 14.6   | 23  |
| AUC <sub>0-t(last)</sub> , norm <sup>(1)</sup>                                                                                                                     | 842          | 1240    | 409     | 830    | 416    | 50  |
| <sup>(2)</sup>                                                                                                                                                     | 55.4         | 51.8    | 16.5    | 41.2   | 21.5   | 52  |
| <sup>(3)</sup>                                                                                                                                                     | 64.5         | 54.5    | 20      | 46.3   | 23.4   | 50  |
| RA, C <sub>max</sub>                                                                                                                                               | 1.31         | 0.914   | 1.34    | 1.19   | 0.239  | 20  |
| RA, AUC <sub>0-t(last)</sub>                                                                                                                                       | 1.24         | 1.03    | 0.6     | 0.958  | 0.328  | 34  |
| N/A: not applicable                                                                                                                                                |              |         |         |        |        |     |
| <sup>(1)</sup> C <sub>max</sub> (ng/mL) and AUC (ng·hour/mL) values normalized to 1 mg/kg dose.                                                                    |              |         |         |        |        |     |
| <sup>(2)</sup> C <sub>max</sub> , metabolite / C <sub>max</sub> , parent; <sup>(3)</sup> AUC <sub>0-t(last)</sub> , metabolite / AUC <sub>0-t(last)</sub> , parent |              |         |         |        |        |     |

Fexinidazole  
Toxicokinetic Report for the study No. 0504-2007

**Table 19.** Day 28 individual and mean ( $\pm$ SD, %CV) pharmacokinetic parameters of Fexinidazole and metabolites after oral 800 mg/kg/day of Fexinidazole in male Sprague Dawley rats.

| Parameter (Units)                             | ID 2844      | ID 2845 | ID 2846 | Mean   | SD     | %CV |
|-----------------------------------------------|--------------|---------|---------|--------|--------|-----|
|                                               | Fexinidazole |         |         |        |        |     |
| C <sub>max</sub> (ng/mL)                      | 670          | 448     | 451     | 523    | 127    | 24  |
| t <sub>max</sub> (hour)                       | 2            | 1       | 4       | 2.33   | 1.53   | 66  |
| AUC <sub>0-24</sub> (ng·hour/mL)              | 4000         | 2600    | 2920    | 3173   | 734    | 23  |
| AUC <sub>0-t(last)</sub> (ng·hour/mL)         | 18100        | 8880    | 8770    | 11900  | 5360   | 45  |
| Regr. Range (hour)                            | 8-48         | 1-48    | 1-48    | N/A    | N/A    | N/A |
| t <sub>1/2,z</sub> (hour)                     | 14           | 8.63    | 11.2    | 11.3   | 2.69   | 24  |
| C <sub>max, norm</sub> <sup>(1)</sup>         | 0.838        | 0.56    | 0.564   | 0.654  | 0.159  | 24  |
| AUC <sub>0-24, norm</sub> <sup>(1)</sup>      | 5            | 3.25    | 3.65    | 3.97   | 0.917  | 23  |
| AUC <sub>0-t(last), norm</sub> <sup>(1)</sup> | 22.6         | 11.1    | 11      | 14.9   | 6.67   | 45  |
| RA,C <sub>max</sub>                           | 0.832        | 0.516   | 0.163   | 0.504  | 0.335  | 66  |
| RA,AUC <sub>0-24</sub>                        | 0.456        | 0.297   | 0.234   | 0.329  | 0.115  | 35  |
| RA,AUC <sub>0-t(last)</sub>                   | 2.06         | 1.01    | 0.702   | 1.26   | 0.713  | 57  |
|                                               | Sulfoxide    |         |         |        |        |     |
| C <sub>max</sub> (ng/mL)                      | 18100        | 14200   | 17400   | 16567  | 2079   | 13  |
| t <sub>max</sub> (hour)                       | 2            | 1       | 2       | 1.67   | 0.577  | 35  |
| AUC <sub>0-24</sub> (ng·hour/mL)              | 194000       | 86200   | 109000  | 129733 | 56812  | 44  |
| AUC <sub>0-t(last)</sub> (ng·hour/mL)         | 194000       | 303000  | 307000  | 268000 | 64100  | 24  |
| Regr. Range (hour)                            | 8-24         | 1-72    | 4-72    | N/A    | N/A    | N/A |
| t <sub>1/2,z</sub> (hour)                     | 1.9          | 9.59    | 8.31    | 6.6    | 4.12   | 62  |
| C <sub>max, norm</sub> <sup>(1)</sup>         | 22.6         | 17.8    | 21.8    | 20.7   | 2.57   | 12  |
| AUC <sub>0-24, norm</sub> <sup>(1)</sup>      | 243          | 108     | 136     | 162    | 71     | 44  |
| AUC <sub>0-t(last), norm</sub> <sup>(1)</sup> | 243          | 379     | 384     | 335    | 80     | 24  |
| <sup>(2)</sup>                                | 25.6         | 30      | 36.5    | 30.7   | 5.5    | 18  |
| <sup>(3)</sup>                                | 10.1         | 32.3    | 33.1    | 25.2   | 13     | 52  |
| RA,C <sub>max</sub>                           | 0.496        | 0.522   | 0.5     | 0.506  | 0.0141 | 3   |
| RA,AUC <sub>0-24</sub>                        | 0.42         | 0.219   | 0.45    | 0.363  | 0.126  | 35  |
| RA,AUC <sub>0-t(last)</sub>                   | 0.42         | 0.769   | 1.27    | 0.819  | 0.427  | 52  |

Fexinidazole  
Toxicokinetic Report for the study No. 0504-2007

**Table 19.** (cont'd). Day 28 individual and mean ( $\pm$ SD, %CV) pharmacokinetic parameters of Fexinidazole and metabolites after oral 800 mg/kg/day of Fexinidazole in male Sprague Dawley rats.

| Parameter (Units)                                                                              | ID 2844 | ID 2845 | ID 2846 | Mean   | SD    | %CV |
|------------------------------------------------------------------------------------------------|---------|---------|---------|--------|-------|-----|
|                                                                                                | Sulfone |         |         |        |       |     |
| C <sub>max</sub> (ng/mL)                                                                       | 30700   | 27800   | 40500   | 33000  | 6655  | 20  |
| t <sub>max</sub> (hour)                                                                        | 8       | 4       | 4       | 5.33   | 2.31  | 43  |
| AUC <sub>0-24</sub> (ng·hour/mL)                                                               | 443000  | 408000  | 526000  | 459000 | 60605 | 13  |
| AUC <sub>0-t(last)</sub> (ng·hour/mL)                                                          | 460000  | 448000  | 618000  | 509000 | 94900 | 19  |
| Regr. Range (hour)                                                                             | 8-72    | 8-72    | 4-72    | N/A    | N/A   | N/A |
| t <sub>1/2,z</sub> (hour)                                                                      | 7.21    | 13.2    | 9.74    | 10.1   | 3.01  | 30  |
| C <sub>max, norm</sub> <sup>(1)</sup>                                                          | 38.4    | 34.8    | 50.6    | 41.3   | 8.28  | 20  |
| AUC <sub>0-24, norm</sub> <sup>(1)</sup>                                                       | 554     | 510     | 658     | 574    | 75.8  | 13  |
| AUC <sub>0-t(last), norm</sub> <sup>(1)</sup>                                                  | 575     | 561     | 773     | 636    | 119   | 19  |
| <sup>(2)</sup>                                                                                 | 41.1    | 55.7    | 80.6    | 59.1   | 20    | 34  |
| <sup>(3)</sup>                                                                                 | 22.8    | 45.3    | 63.2    | 43.8   | 20.3  | 46  |
| RA,C <sub>max</sub>                                                                            | 0.777   | 0.66    | 1.03    | 0.823  | 0.189 | 23  |
| RA,AUC <sub>0-24</sub>                                                                         | 0.723   | 0.657   | 3.29    | 1.56   | 1.5   | 96  |
| RA,AUC <sub>0-t(last)</sub>                                                                    | 0.75    | 0.721   | 3.86    | 1.78   | 1.81  | 102 |
| N/A: not applicable;                                                                           |         |         |         |        |       |     |
| <sup>(1)</sup> C <sub>max</sub> (ng/mL) and AUC (ng·hour/mL) values normalized to 1 mg/kg dose |         |         |         |        |       |     |
| <sup>(2)</sup> C <sub>max, metabolite</sub> / C <sub>max, parent</sub> ;                       |         |         |         |        |       |     |
| <sup>(3)</sup> AUC <sub>0-t(last), metabolite</sub> / AUC <sub>0-t(last), parent</sub>         |         |         |         |        |       |     |

Fexinidazole  
Toxicokinetic Report for the study No. 0504-2007

**Table 20.** Day 28 individual and mean ( $\pm$ SD, %CV) pharmacokinetic parameters of Fexinidazole and metabolites after oral 800 mg/kg/day of Fexinidazole in female Sprague Dawley rats.

| Parameter (Units)                             | ID 2856      | ID 2857 | Mean   | SD     | %CV |
|-----------------------------------------------|--------------|---------|--------|--------|-----|
|                                               | Fexinidazole |         |        |        |     |
| C <sub>max</sub> (ng/mL)                      | 685          | 812     | 749    | 89.8   | 12  |
| t <sub>max</sub> (hour)                       | 2            | 1       | 1.5    | 0.707  | 47  |
| AUC <sub>0-24</sub> (ng·hour/mL)              | 6380         | 8900    | 7640   | 1782   | 23  |
| AUC <sub>0-t(last)</sub> (ng·hour/mL)         | 6380         | 9500    | 7940   | 2210   | 28  |
| Regr. Range (hour)                            | 2-24         | 1-48    | N/A    | N/A    | N/A |
| t <sub>1/2,z</sub> (hour)                     | 5.13         | 8.35    | 6.74   | 2.28   | 34  |
| C <sub>max, norm</sub> <sup>(1)</sup>         | 0.856        | 1.02    | 0.938  | 0.116  | 12  |
| AUC <sub>0-24, norm</sub> <sup>(1)</sup>      | 7.97         | 11.1    | 9.55   | 2.23   | 23  |
| AUC <sub>0-t(last), norm</sub> <sup>(1)</sup> | 7.97         | 11.9    | 9.94   | 2.78   | 28  |
| RA,C <sub>max</sub>                           | 0.405        | 0.629   | 0.517  | 0.158  | 31  |
| RA,AUC <sub>0-24</sub>                        | 0.382        | 0.476   | 0.429  | 0.0664 | 15  |
| RA,AUC <sub>0-t(last)</sub>                   | 0.382        | 0.508   | 0.445  | 0.0891 | 20  |
|                                               | Sulfoxide    |         |        |        |     |
| C <sub>max</sub> (ng/mL)                      | 24400        | 27300   | 25850  | 2051   | 8   |
| t <sub>max</sub> (hour)                       | 2            | 4       | 3      | 1.41   | 47  |
| AUC <sub>0-24</sub> (ng·hour/mL)              | 263000       | 320000  | 291500 | 40305  | 14  |
| AUC <sub>0-t(last)</sub> (ng·hour/mL)         | 290000       | 371000  | 331000 | 57300  | 17  |
| Regr. Range (hour)                            | 4-48         | 4-72    | N/A    | N/A    | N/A |
| t <sub>1/2,z</sub> (hour)                     | 6.99         | 10.2    | 8.6    | 2.27   | 26  |
| C <sub>max, norm</sub> <sup>(1)</sup>         | 30.5         | 34.1    | 32.3   | 2.55   | 8   |
| AUC <sub>0-24, norm</sub> <sup>(1)</sup>      | 329          | 400     | 364    | 50.4   | 14  |
| AUC <sub>0-t(last), norm</sub> <sup>(1)</sup> | 362          | 463     | 413    | 71.4   | 17  |
| <sup>(2)</sup>                                | 33.7         | 31.8    | 32.7   | 1.34   | 4   |
| <sup>(3)</sup>                                | 43           | 36.9    | 40     | 4.28   | 11  |
| RA,C <sub>max</sub>                           | 0.865        | 0.901   | 0.883  | 0.0253 | 3   |
| RA,AUC <sub>0-24</sub>                        | 0.645        | 0.581   | 0.613  | 0.0451 | 7   |
| RA,AUC <sub>0-t(last)</sub>                   | 0.711        | 0.673   | 0.692  | 0.0265 | 4   |

Fexinidazole  
Toxicokinetic Report for the study No. 0504-2007

**Table 20.** (cont'd). Day 28 individual and mean ( $\pm$ SD, %CV) pharmacokinetic parameters of Fexinidazole and metabolites after oral 800 mg/kg/day of Fexinidazole in female Sprague Dawley rats.

| Parameter (Units)                                                                              | ID 2856 | ID 2857 | Mean   | SD     | %CV |
|------------------------------------------------------------------------------------------------|---------|---------|--------|--------|-----|
|                                                                                                | Sulfone |         |        |        |     |
| C <sub>max</sub> (ng/mL)                                                                       | 44000   | 39800   | 41900  | 2970   | 7   |
| t <sub>max</sub> (hour)                                                                        | 4       | 8       | 6      | 2.83   | 47  |
| AUC <sub>0-24</sub> (ng·hour/mL)                                                               | 533000  | 610000  | 571500 | 54447  | 10  |
| AUC <sub>0-t(last)</sub> (ng·hour/mL)                                                          | 642000  | 833000  | 738000 | 135000 | 18  |
| Regr. Range (hour)                                                                             | 4-72    | 8-72    | N/A    | N/A    | N/A |
| t <sub>1/2,z</sub> (hour)                                                                      | 6.83    | 14.7    | 10.8   | 5.56   | 52  |
| C <sub>max, norm</sub> <sup>(1)</sup>                                                          | 55      | 49.8    | 52.4   | 3.68   | 7   |
| AUC <sub>0-24, norm</sub> <sup>(1)</sup>                                                       | 666     | 763     | 714    | 68.1   | 10  |
| AUC <sub>0-t(last), norm</sub> <sup>(1)</sup>                                                  | 803     | 1040    | 922    | 168    | 18  |
| <sup>(2)</sup>                                                                                 | 57.6    | 44      | 50.8   | 9.66   | 19  |
| <sup>(3)</sup>                                                                                 | 90.3    | 78.7    | 84.5   | 8.21   | 10  |
| RA,C <sub>max</sub>                                                                            | 1.5     | 0.589   | 1.04   | 0.642  | 62  |
| RA,AUC <sub>0-24</sub>                                                                         | 0.983   | 0.635   | 0.809  | 0.247  | 30  |
| RA,AUC <sub>0-t(last)</sub>                                                                    | 1.18    | 0.867   | 1.03   | 0.225  | 22  |
| N/A: not applicable;                                                                           |         |         |        |        |     |
| <sup>(1)</sup> C <sub>max</sub> (ng/mL) and AUC (ng·hour/mL) values normalized to 1 mg/kg dose |         |         |        |        |     |
| <sup>(2)</sup> C <sub>max, metabolite</sub> / C <sub>max, parent</sub> ;                       |         |         |        |        |     |
| <sup>(3)</sup> AUC <sub>0-t(last), metabolite</sub> / AUC <sub>0-t(last), parent</sub> .       |         |         |        |        |     |



Fexinidazole  
Toxicokinetic Report for the study No. 0504-2007

**Figure 1.** Day 1 individual plasma concentrations (ng/mL) of Fexinidazole and metabolites after oral 50 mg/kg/day dose of Fexinidazole in male (upper panel) and female (lower panel) Sprague Dawley rats.

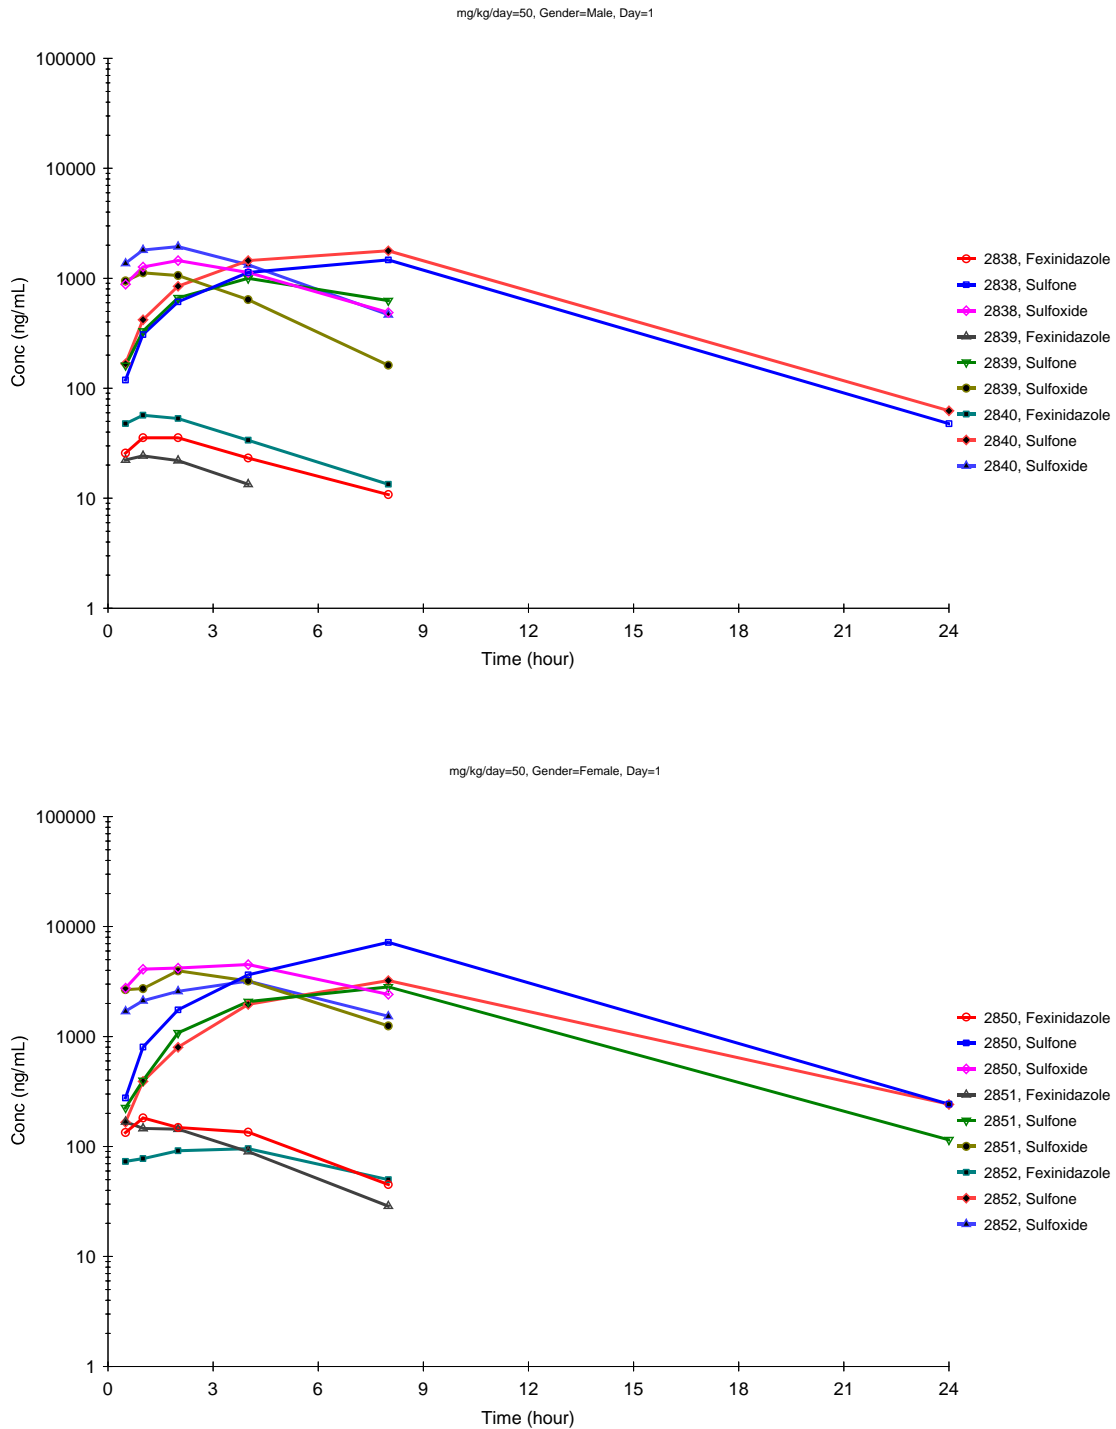

Fexinidazole  
Toxicokinetic Report for the study No. 0504-2007

**Figure 2.** Day 14 individual plasma concentrations (ng/mL) of Fexinidazole and metabolites after oral 50 mg/kg/day dose of Fexinidazole in male (upper panel) and female (lower panel) Sprague Dawley rats.

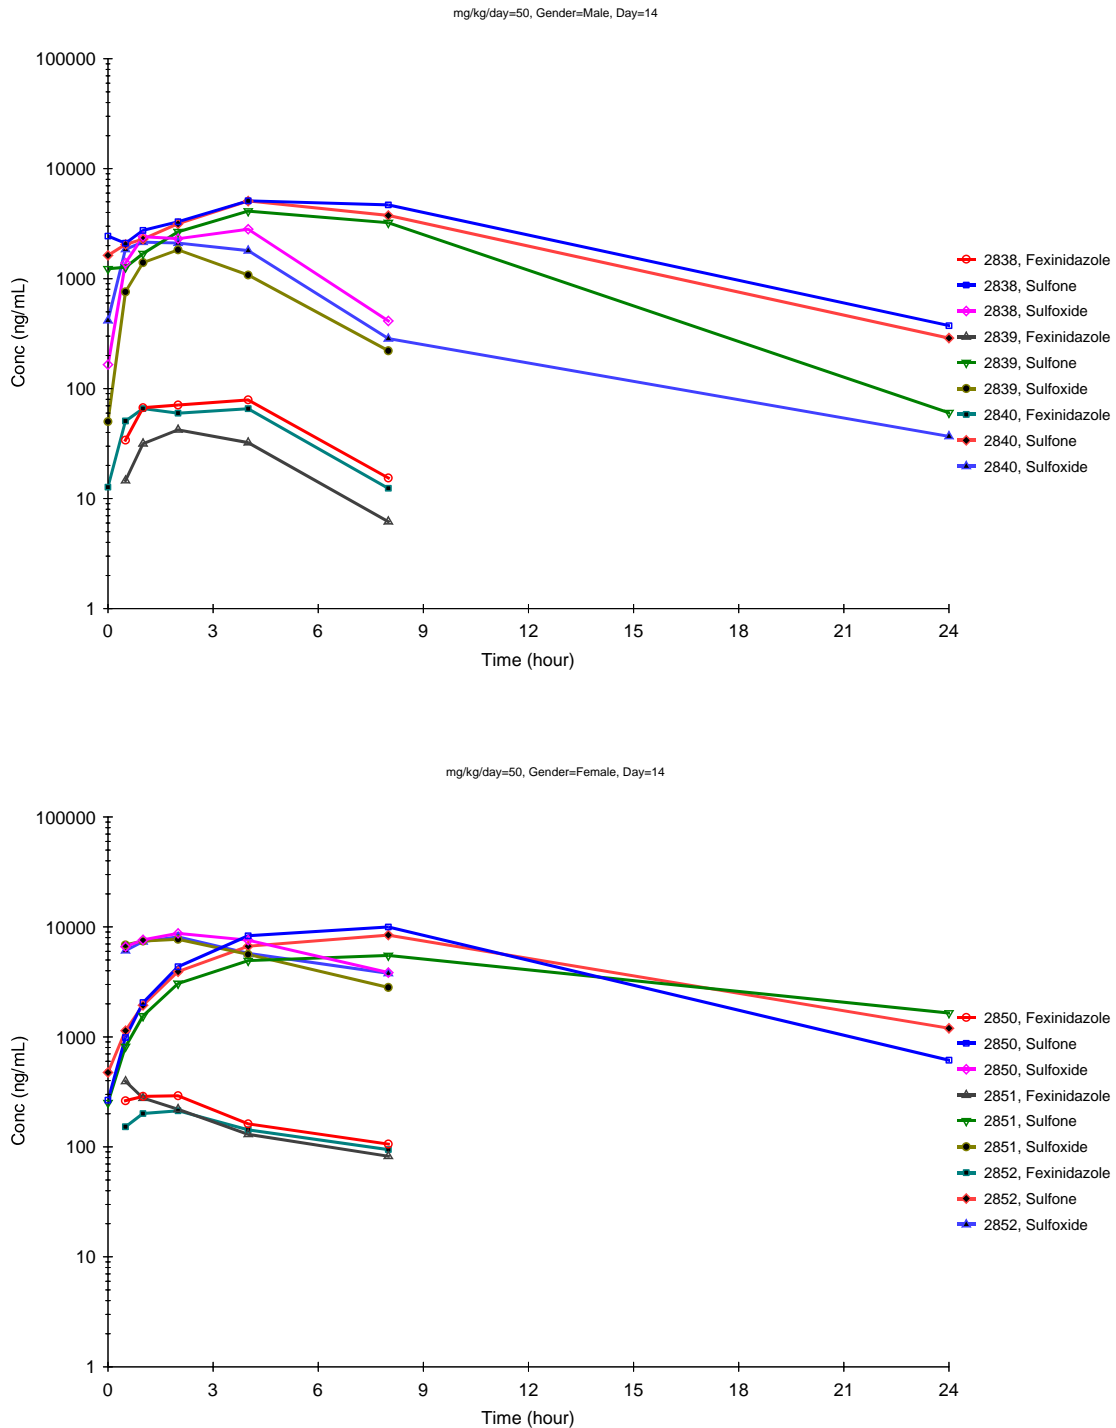

Fexinidazole  
Toxicokinetic Report for the study No. 0504-2007

**Figure 3.** Day 28 individual plasma concentrations (ng/mL) of Fexinidazole and metabolites after oral 50 mg/kg/day dose of Fexinidazole in male (upper panel) and female (lower panel) Sprague Dawley rats.

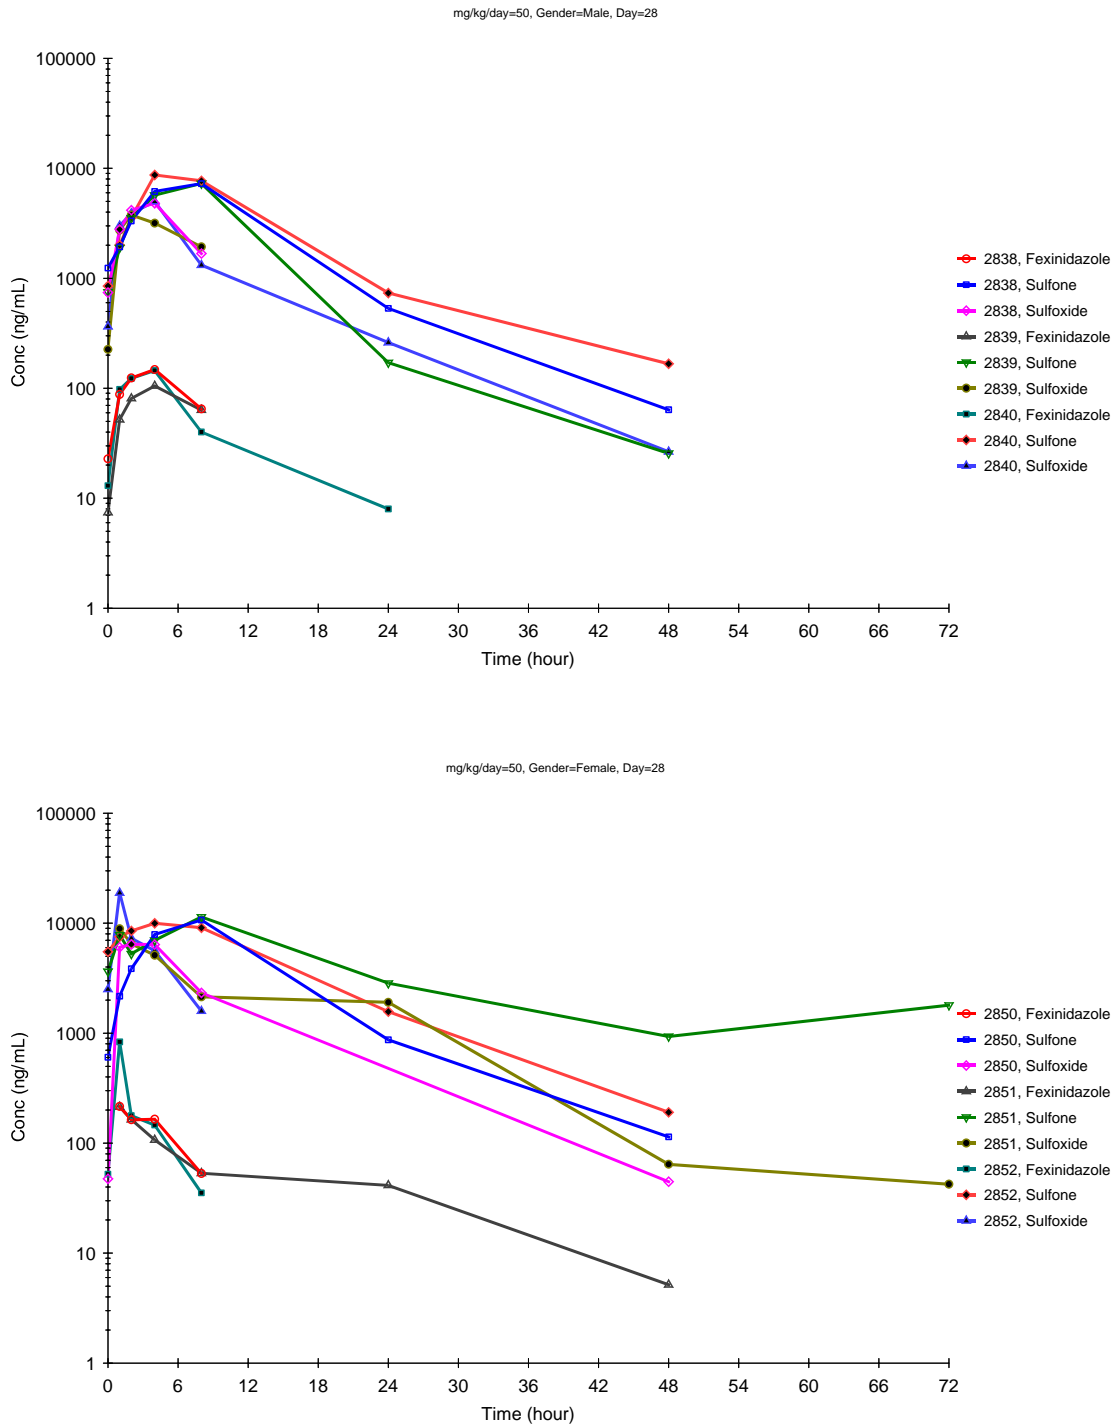

Fexinidazole  
Toxicokinetic Report for the study No. 0504-2007

**Figure 4.** Day 1 individual plasma concentrations (ng/mL) of Fexinidazole and metabolites after oral 200 mg/kg/day dose of Fexinidazole in male (upper panel) and female (lower panel) Sprague Dawley rats.

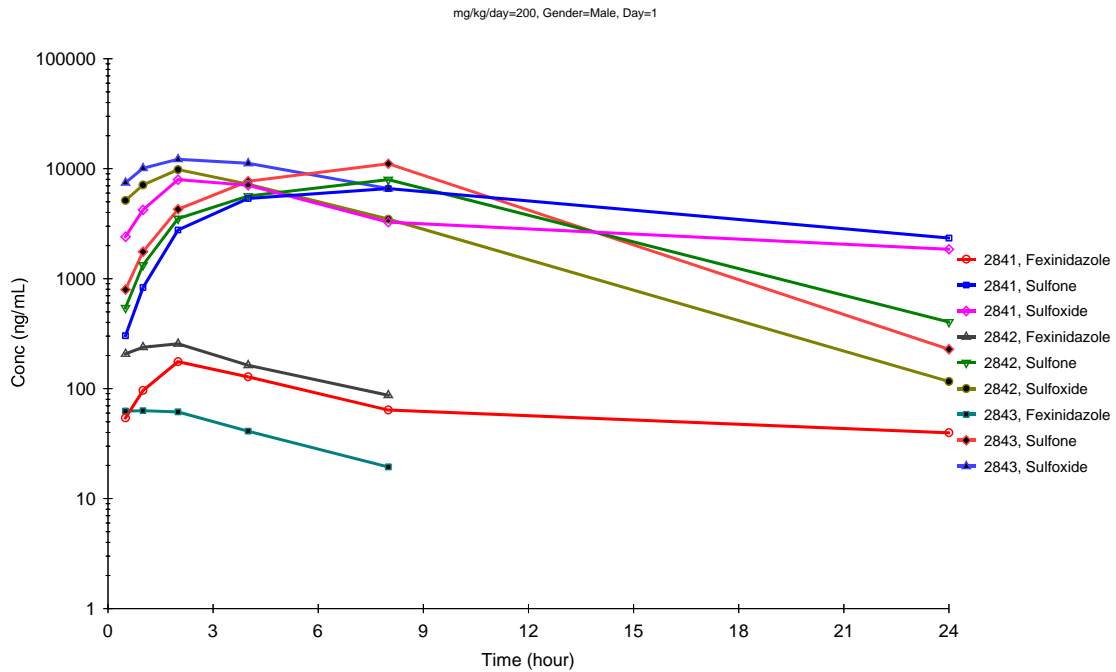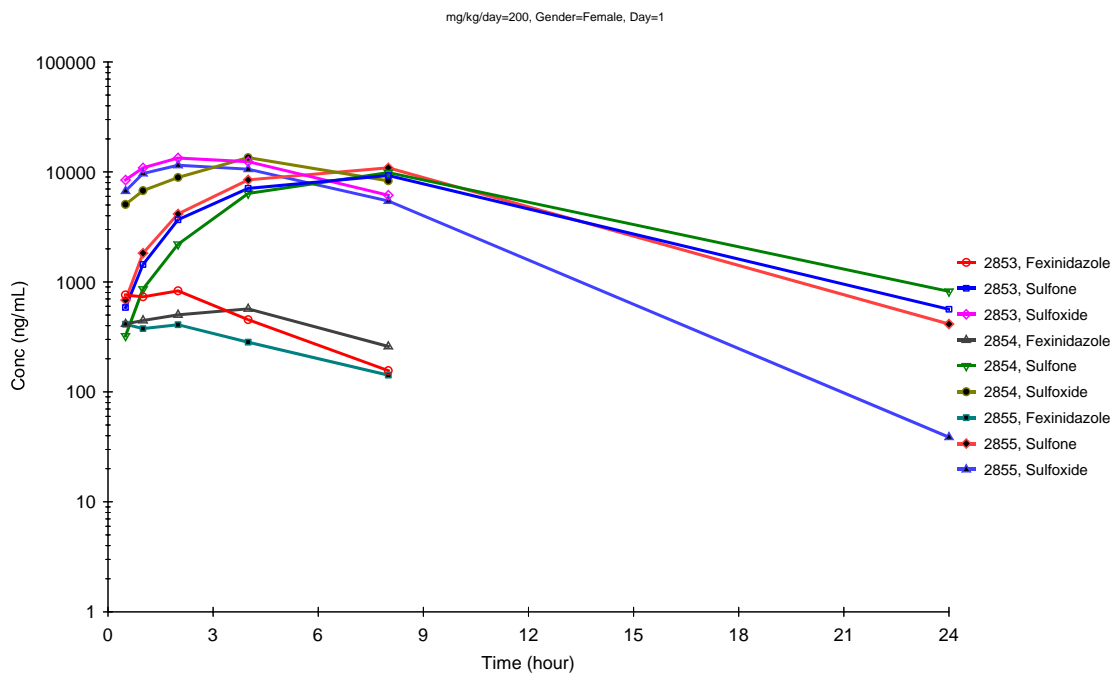

Fexinidazole  
Toxicokinetic Report for the study No. 0504-2007

**Figure 5.** Day 14 individual plasma concentrations (ng/mL) of Fexinidazole and metabolites after oral 200 mg/kg/day dose of Fexinidazole in male (upper panel) and female (lower panel) Sprague Dawley rats.

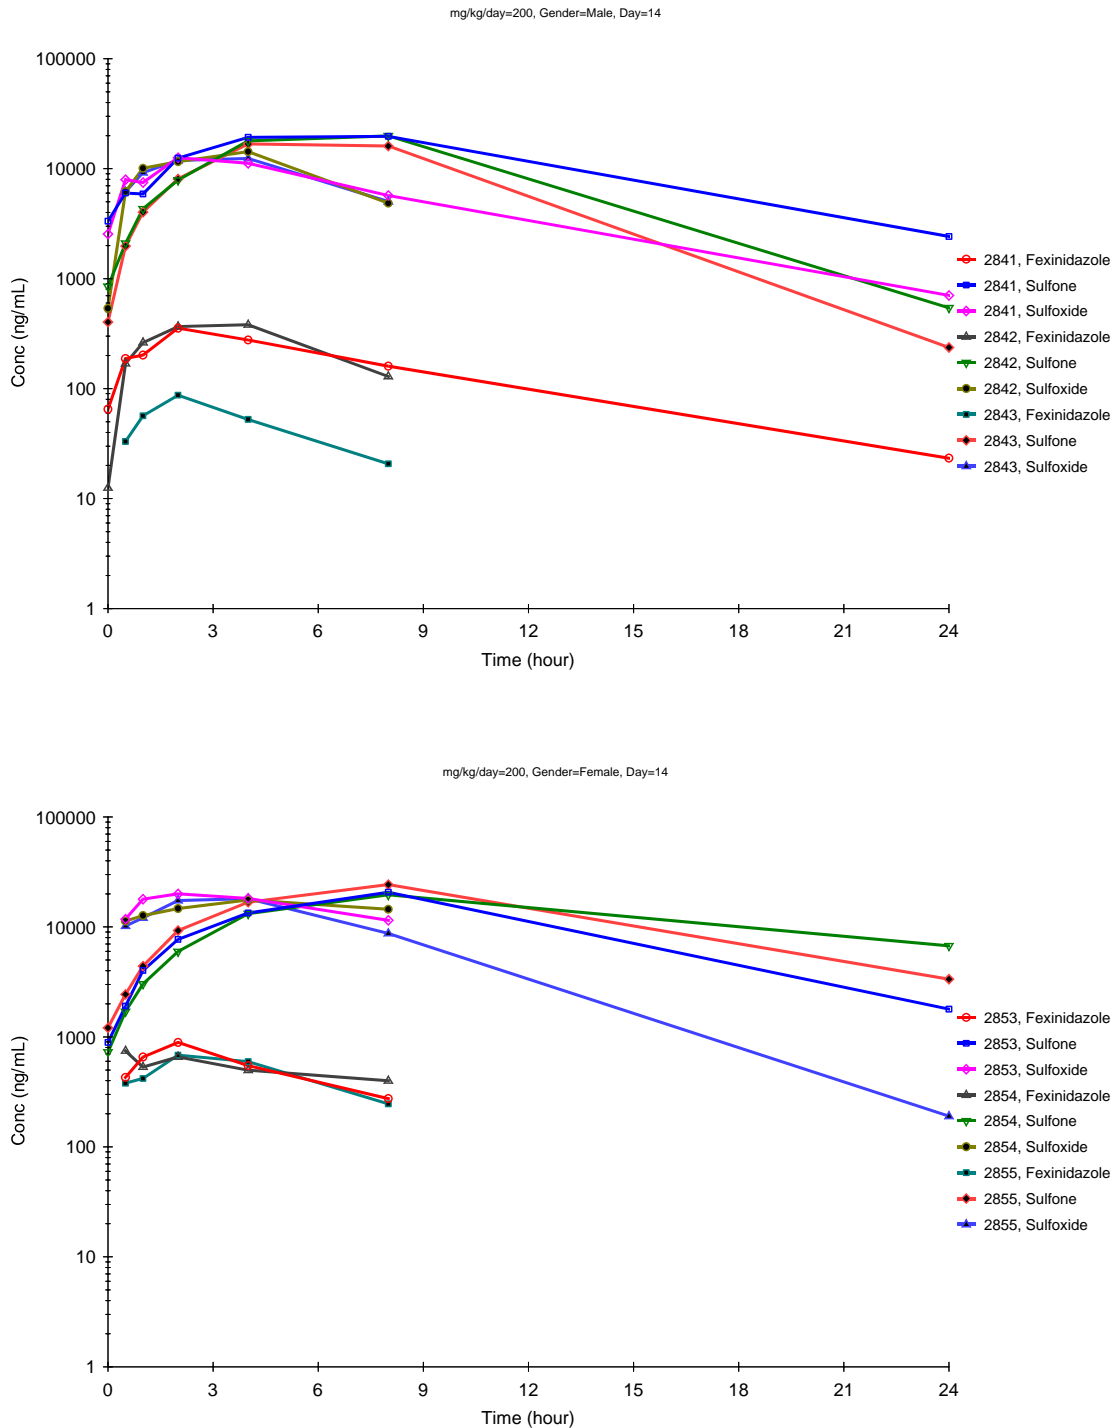

Fexinidazole  
Toxicokinetic Report for the study No. 0504-2007

**Figure 6.** Day 28 individual plasma concentrations (ng/mL) of Fexinidazole and metabolites after oral 200 mg/kg/day dose of Fexinidazole in male (upper panel) and female (lower panel) Sprague Dawley rats.

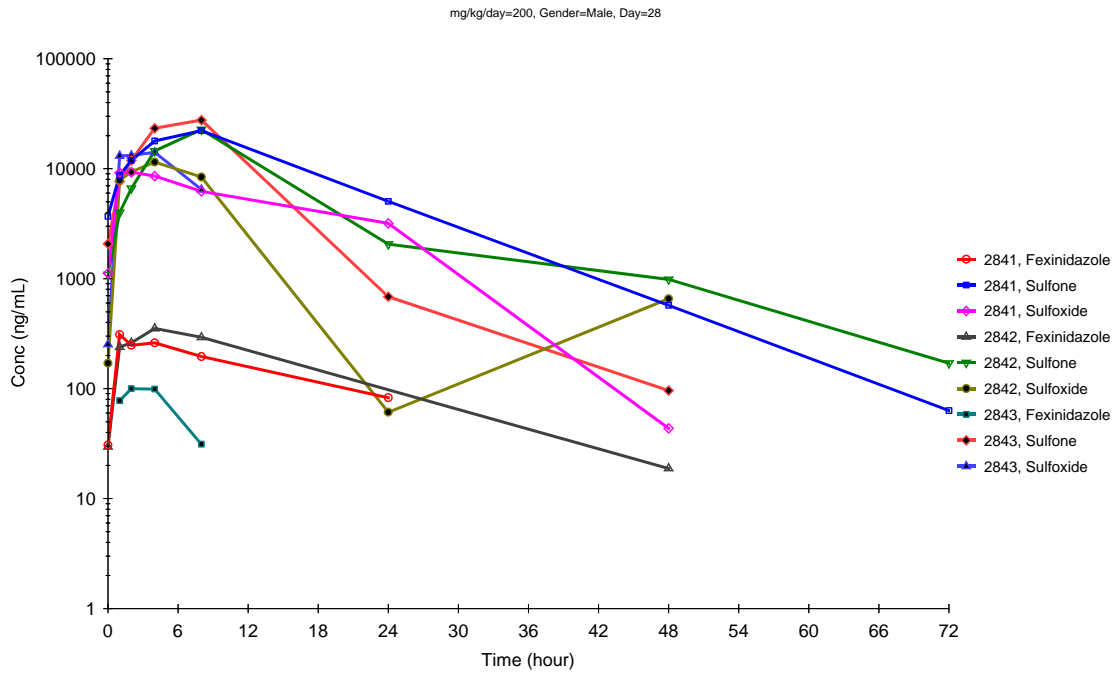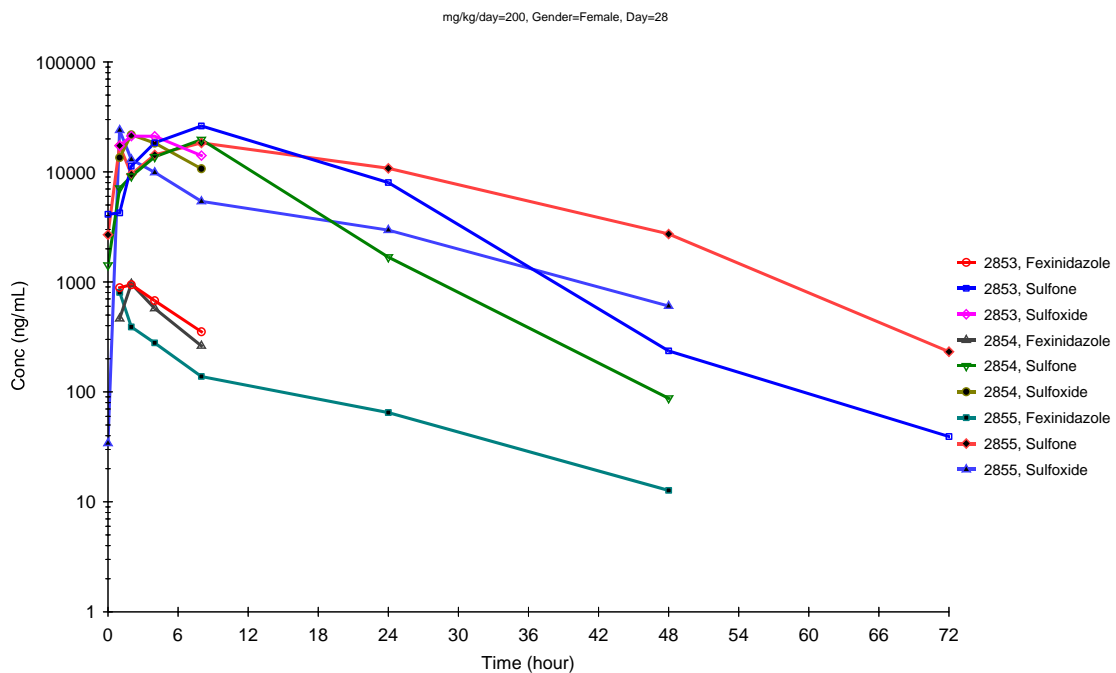

Fexinidazole  
Toxicokinetic Report for the study No. 0504-2007

**Figure 7.** Day 1 individual plasma concentrations (ng/mL) of Fexinidazole and metabolites after oral 800 mg/kg/day dose of Fexinidazole in male (upper panel) and female (lower panel) Sprague Dawley rats.

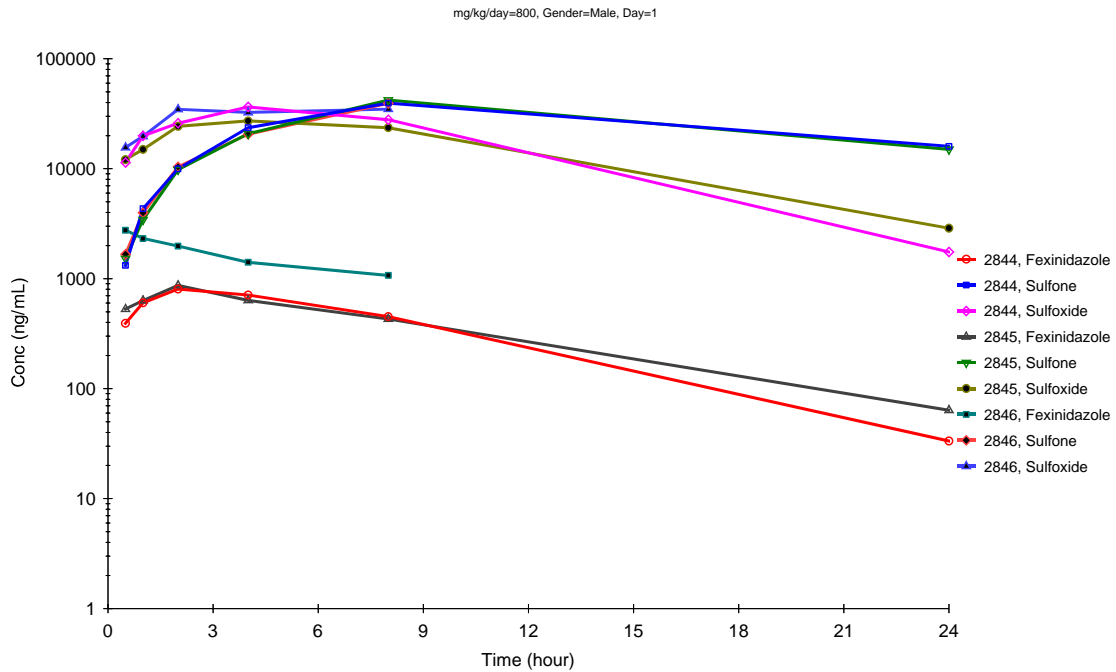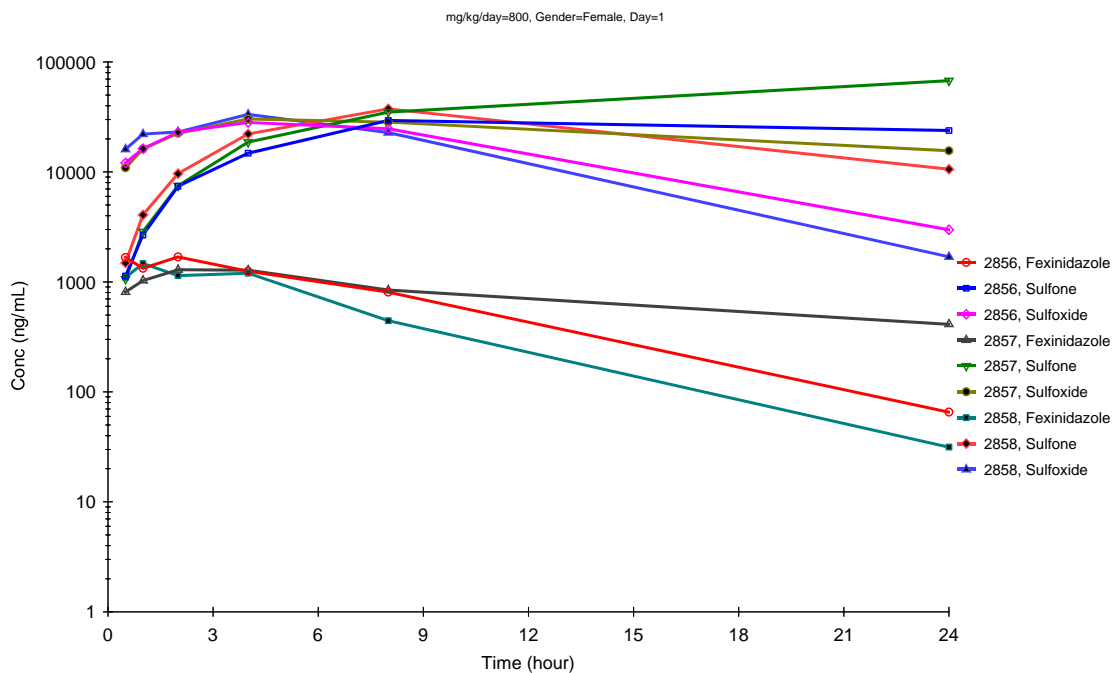

Fexinidazole  
Toxicokinetic Report for the study No. 0504-2007

**Figure 8.** Day 14 individual plasma concentrations (ng/mL) of Fexinidazole and metabolites after oral 800 mg/kg/day dose of Fexinidazole in male (upper panel) and female (lower panel) Sprague Dawley rats.

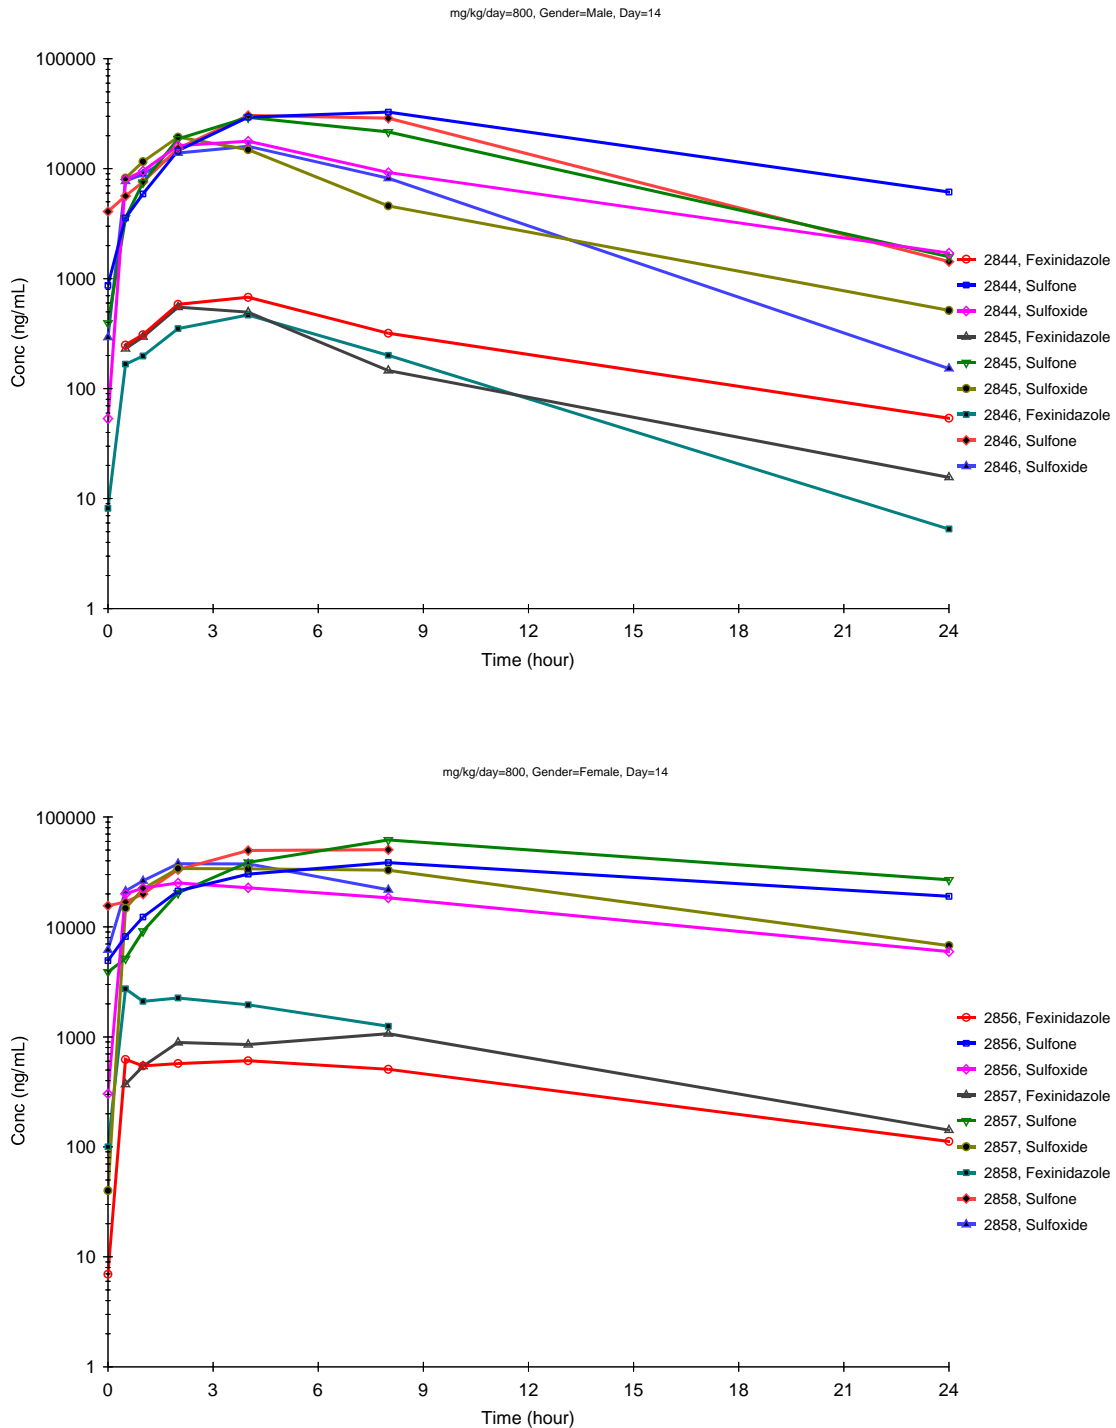



Fexinidazole  
Toxicokinetic Report for the study No. 0504-2007

**Figure 9.** Day 28 individual plasma concentrations (ng/mL) of Fexinidazole and metabolites after oral 800 mg/kg/day dose of Fexinidazole in male (upper panel) and female (lower panel) Sprague Dawley rats.

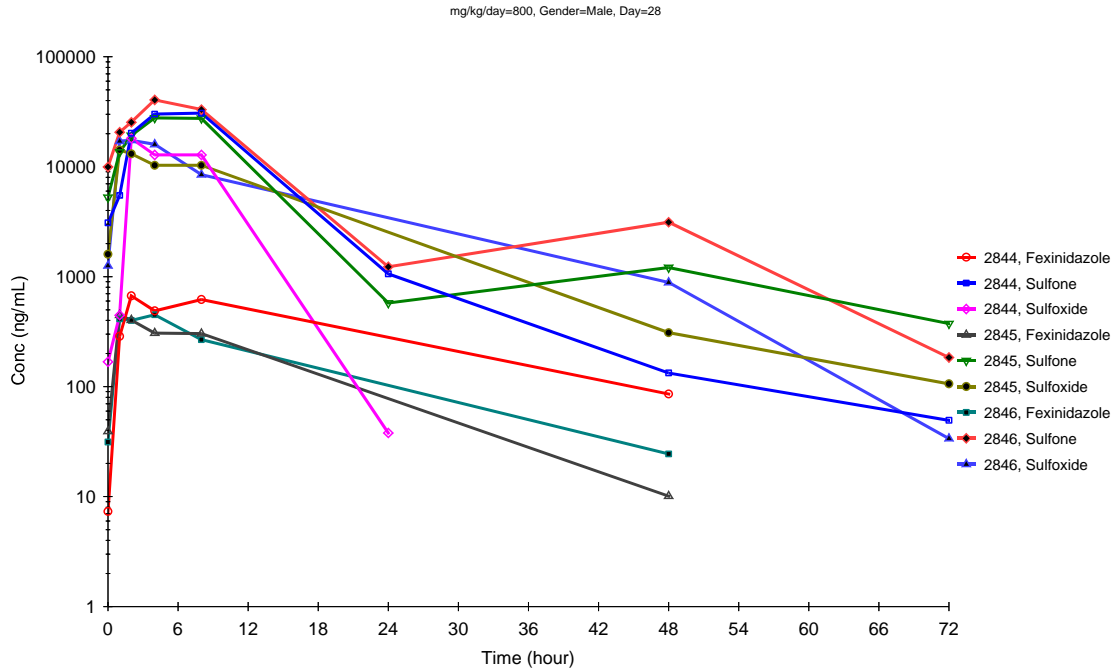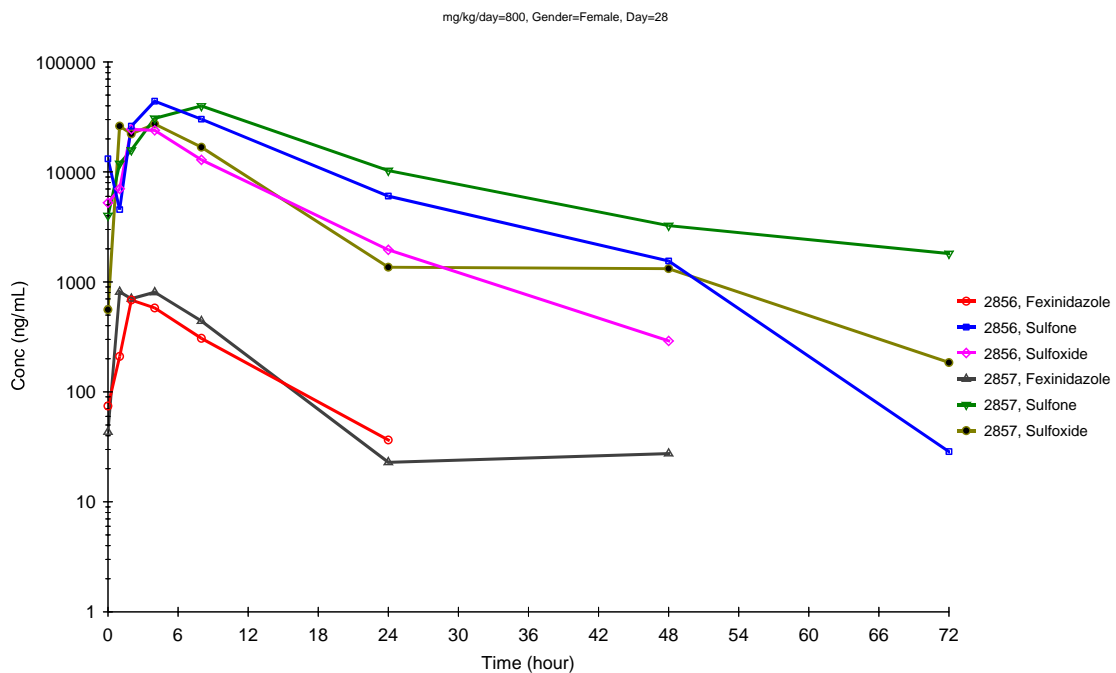

Fexinidazole  
 Toxicokinetic Report for the study No. 0504-2007

**Figure 10.** Day 1 mean (+SD) plasma concentrations (ng/mL) of Fexinidazole and metabolites after single and repeated oral 50, 200 and 800 mg/kg/day of Fexinidazole in male Sprague Dawley rats.

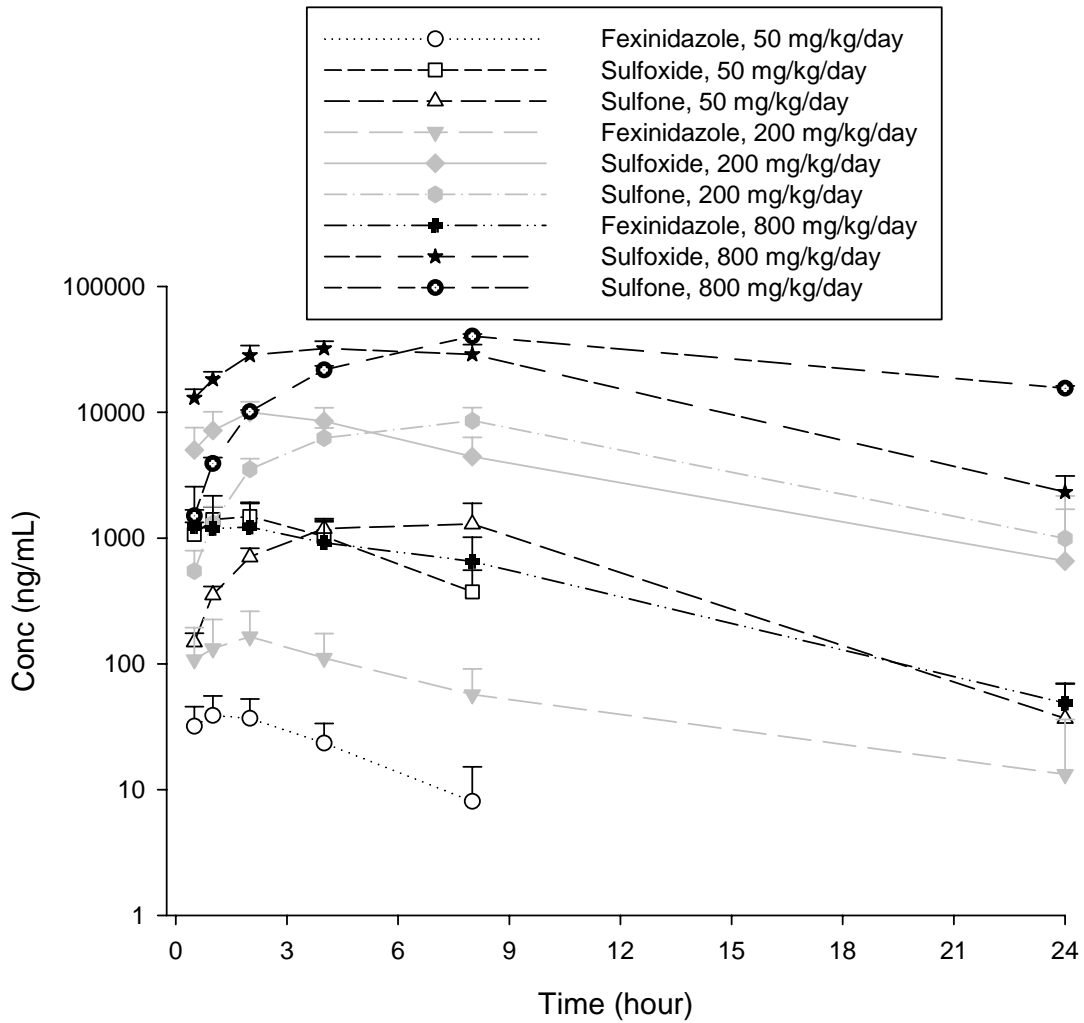

Fexinidazole  
 Toxicokinetic Report for the study No. 0504-2007

**Figure 11.** Day 1 mean (+SD) plasma concentrations (ng/mL) of Fexinidazole and metabolites after single and repeated oral 50, 200 and 800 mg/kg/day of Fexinidazole in female Sprague Dawley rats.

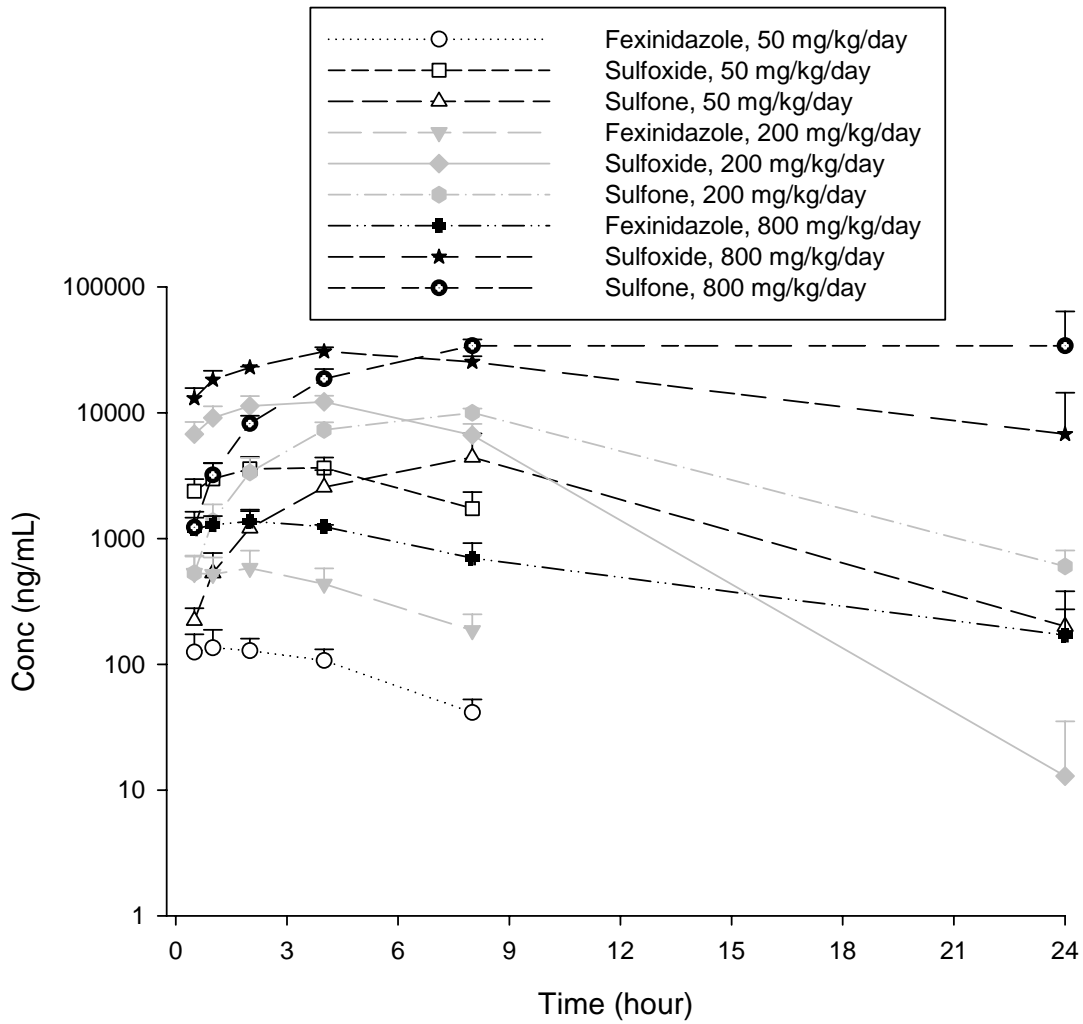

Fexinidazole  
 Toxicokinetic Report for the study No. 0504-2007

**Figure 12.** Day 14 mean (+SD) plasma concentrations (ng/mL) of Fexinidazole and metabolites after single and repeated oral 50, 200 and 800 mg/kg/day of Fexinidazole in male Sprague Dawley rats.

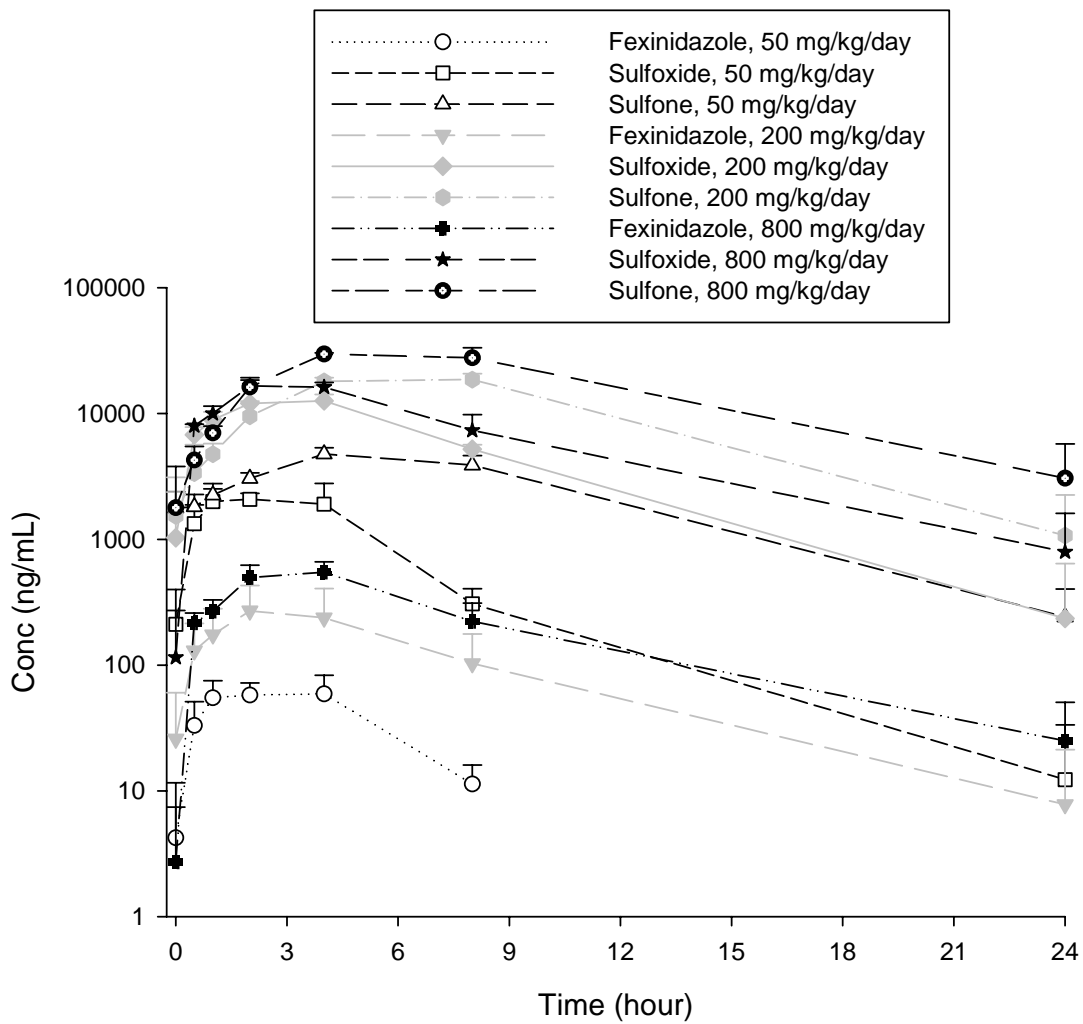

Fexinidazole  
 Toxicokinetic Report for the study No. 0504-2007

**Figure 13.** Day 14 mean (+SD) plasma concentrations (ng/mL) of Fexinidazole and metabolites after single and repeated oral 50, 200 and 800 mg/kg/day of Fexinidazole in female Sprague Dawley rats.

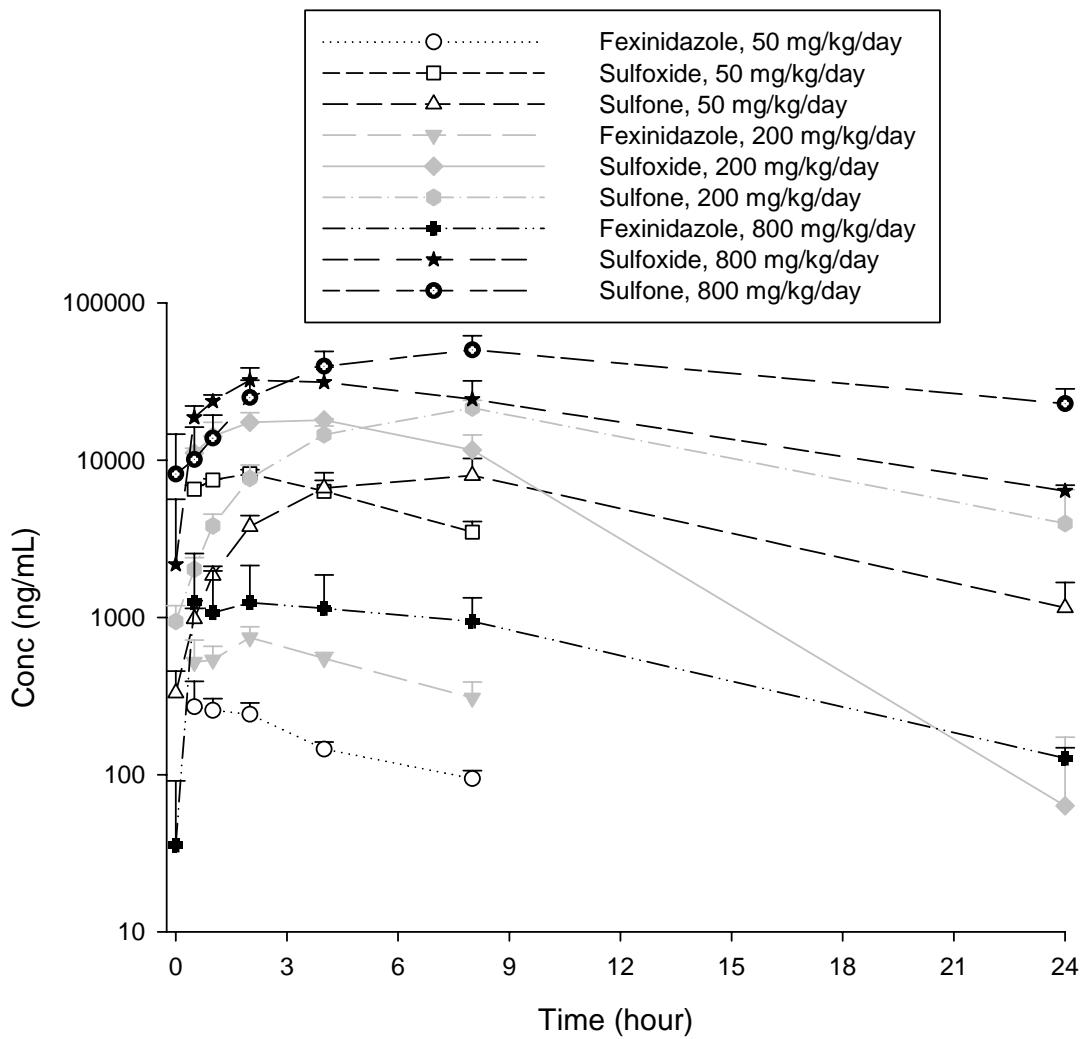

Fexinidazole  
 Toxicokinetic Report for the study No. 0504-2007

**Figure 14.** Day 28 mean (+SD) plasma concentrations (ng/mL) of Fexinidazole and metabolites after single and repeated oral 50, 200 and 800 mg/kg/day of Fexinidazole in male Sprague Dawley rats.

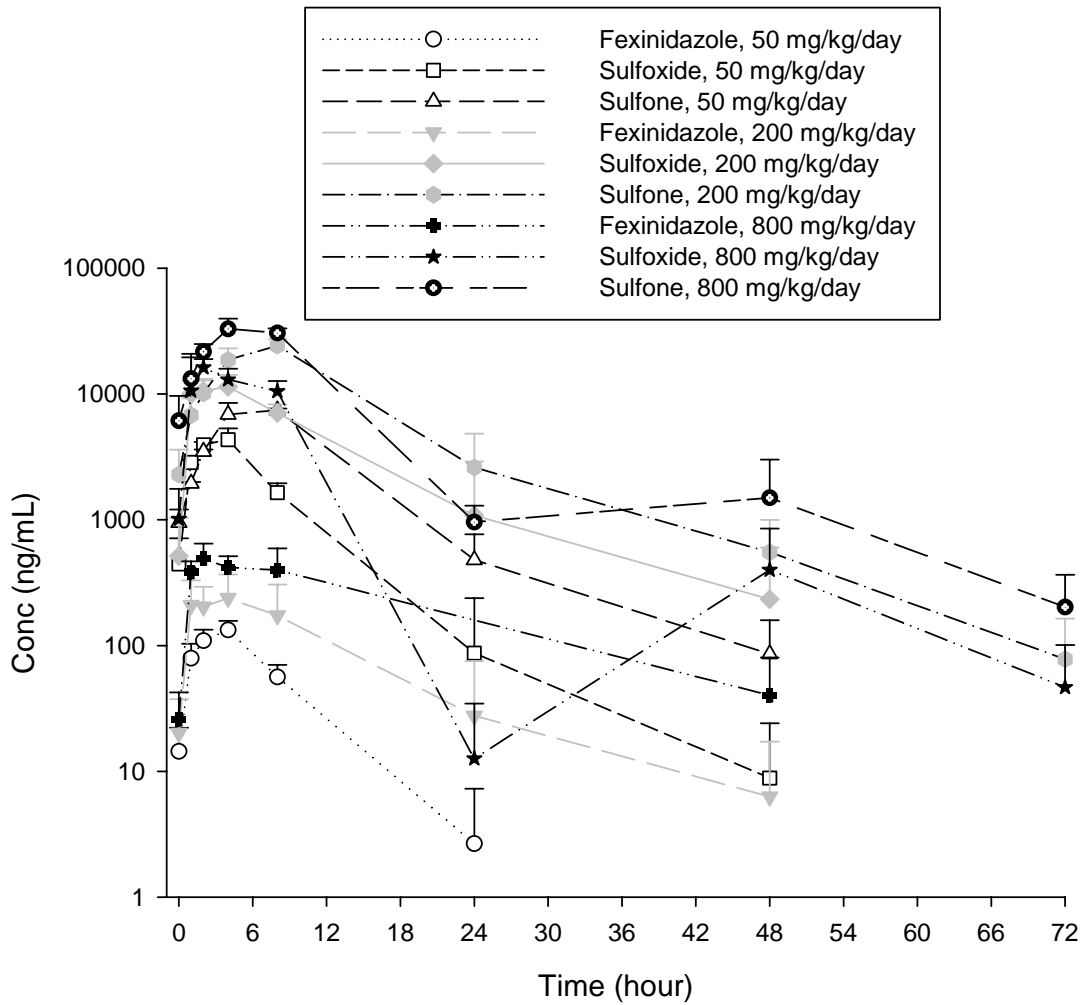

Fexinidazole  
 Toxicokinetic Report for the study No. 0504-2007

**Figure 15.** Day 28 mean (+SD) plasma concentrations (ng/mL) of Fexinidazole and metabolites after single and repeated oral 50, 200 and 800 mg/kg/day of Fexinidazole in female Sprague Dawley rats.

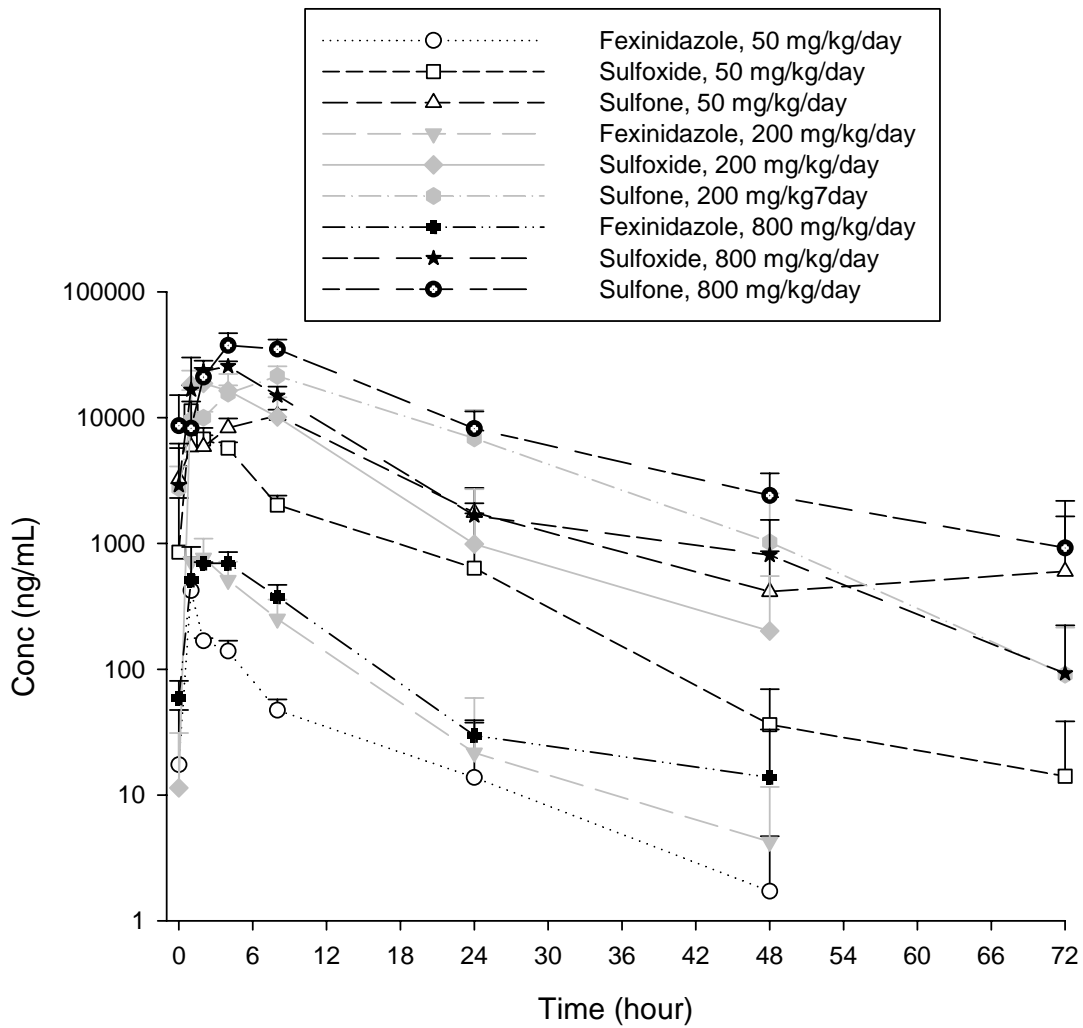

Fexinidazole  
 Toxicokinetic Report for the study No. 0504-2007

**Figure 16.** Mean ( $\pm$ SD) normalized  $C_{max}$  (upper panel) and  $AUC_{0-t(last)}$  (on Day 28 AUC within 24 hours, lower panel) of Fexinidazole after single and repeated oral 50, 200 and 800 mg/kg/day of Fexinidazole in male Sprague Dawley rats.

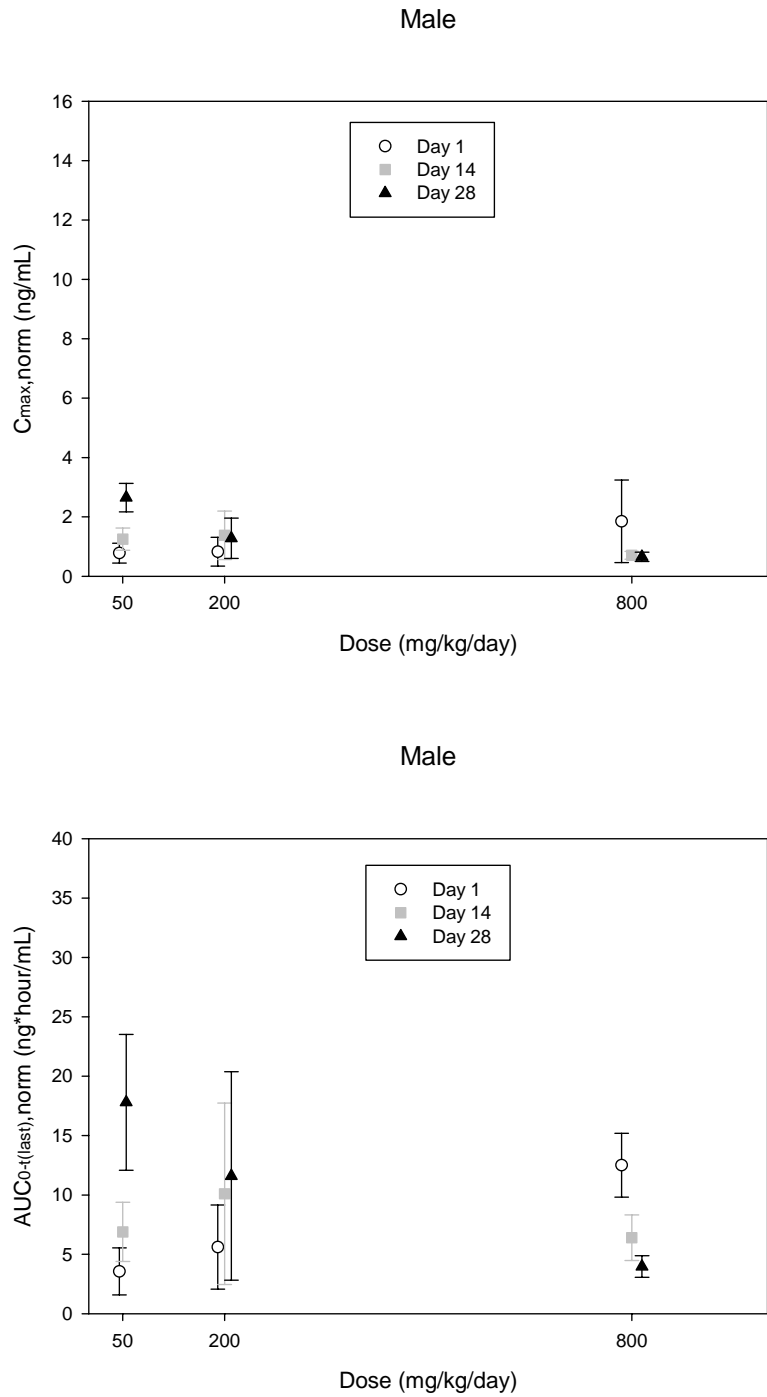



Fexinidazole  
 Toxicokinetic Report for the study No. 0504-2007

**Figure 17.** Mean ( $\pm$ SD) normalized  $C_{max}$  (upper panel) and  $AUC_{0-t(last)}$  (on Day 28 AUC within 24 hours, lower panel) of Fexinidazole after single and repeated oral 50, 200 and 800 mg/kg/day of Fexinidazole in female Sprague Dawley rats.

Female

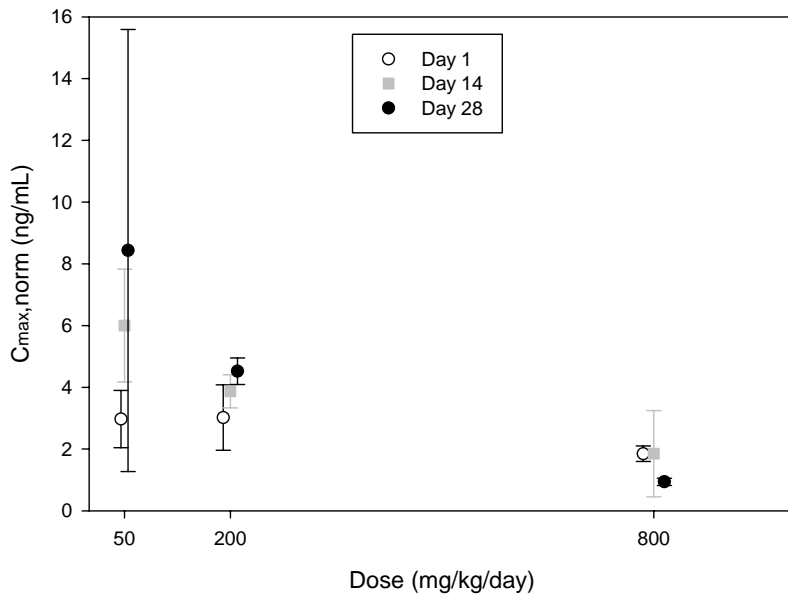

Female

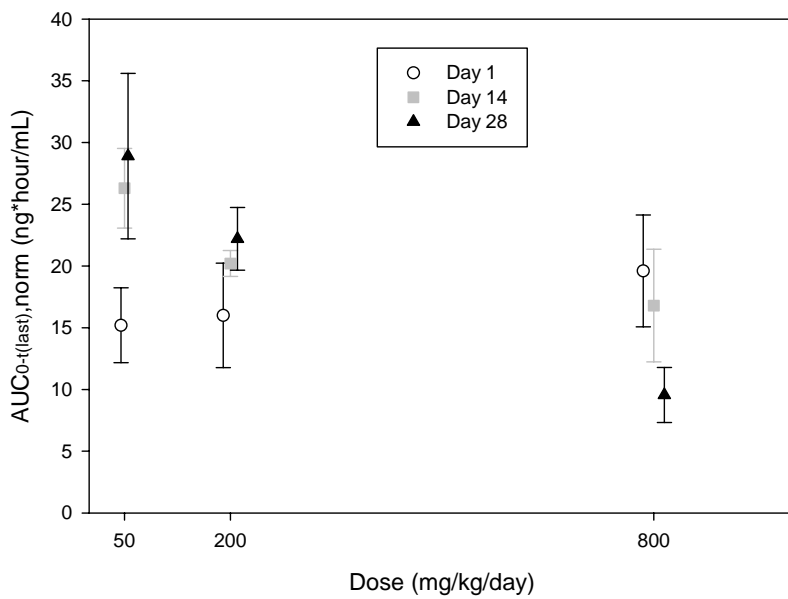

Fexinidazole  
 Toxicokinetic Report for the study No. 0504-2007

**Figure 18.** Mean ( $\pm$ SD) normalized  $C_{max}$  (upper panel) and  $AUC_{0-t(last)}$  (on Day 28 AUC within 24 hours, lower panel) of the sulfoxide derivative after single and repeated oral 50, 200 and 800 mg/kg/day of Fexinidazole in male Sprague Dawley rats.

Male

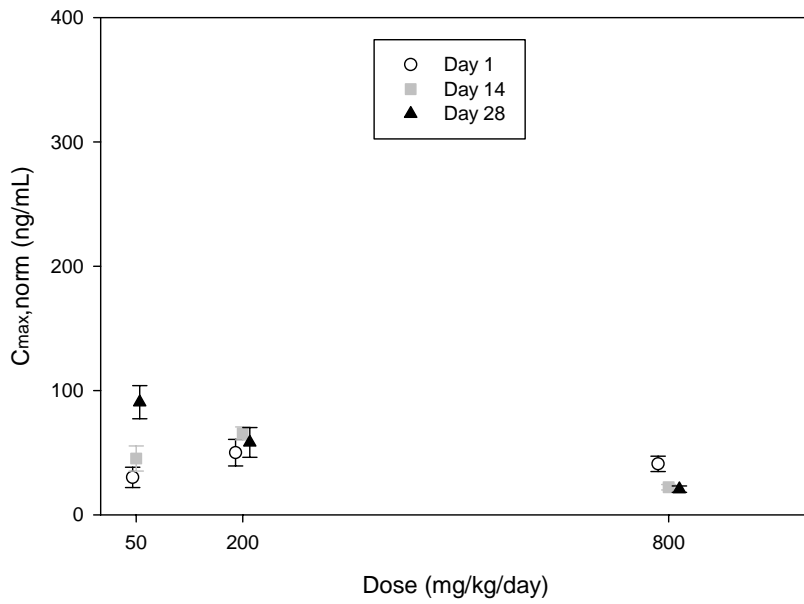

Male

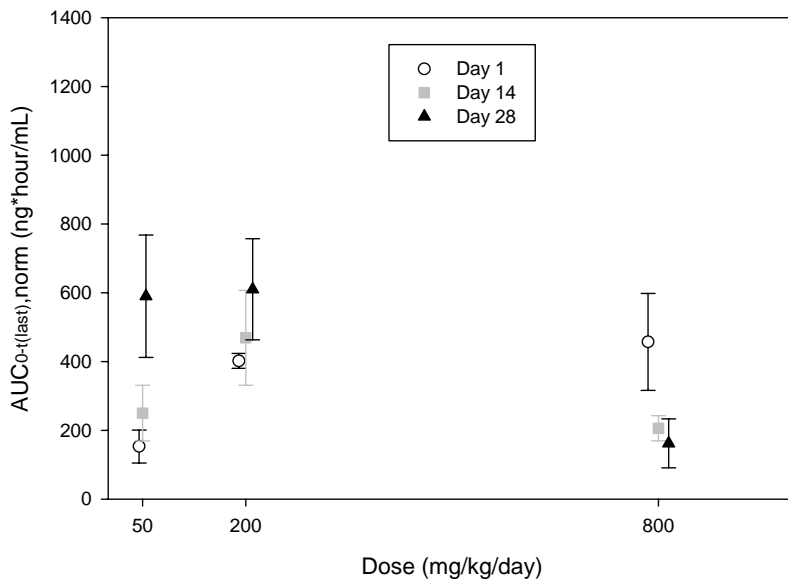

Fexinidazole  
 Toxicokinetic Report for the study No. 0504-2007

**Figure 19.** Mean ( $\pm$ SD) normalized  $C_{max}$  (upper panel) and  $AUC_{0-t(last)}$  (on Day 28 AUC within 24 hours, lower panel) of the sulfoxide derivative after single and repeated oral 50, 200 and 800 mg/kg/day of Fexinidazole in female Sprague Dawley rats.

Female

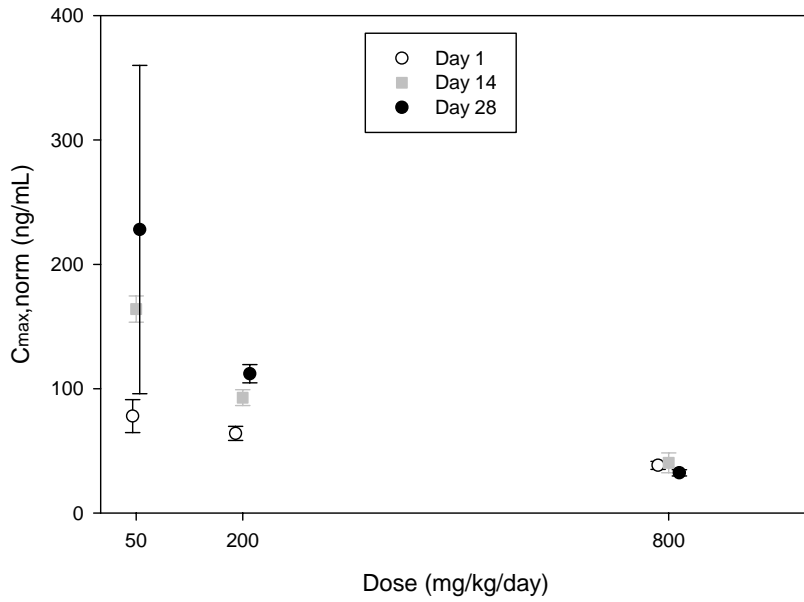

Female

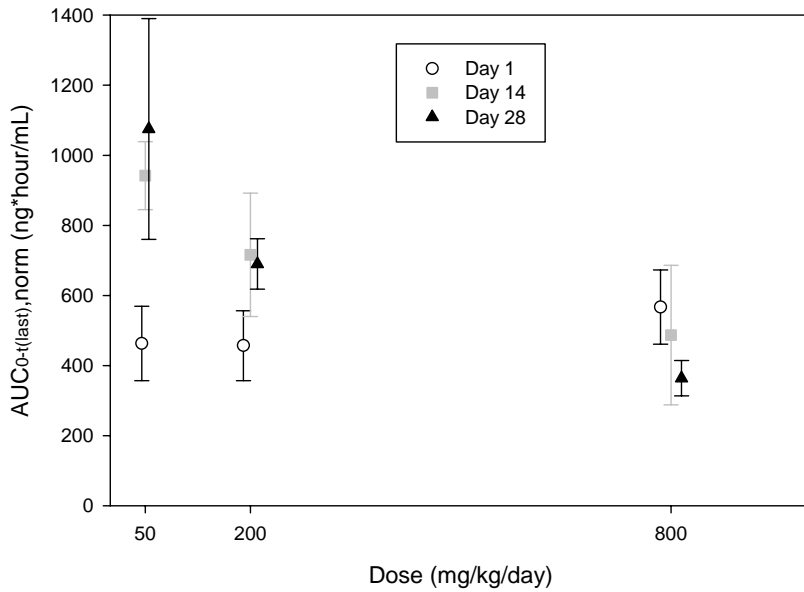

Fexinidazole  
 Toxicokinetic Report for the study No. 0504-2007

**Figure 20.** Mean ( $\pm$ SD) normalized  $C_{max}$  (upper panel) and  $AUC_{0-t(last)}$  (on Day 28 AUC within 24 hours, lower panel) of the sulfone derivative after single and repeated oral 50, 200 and 800 mg/kg/day of Fexinidazole in male Sprague Dawley rats.

Male

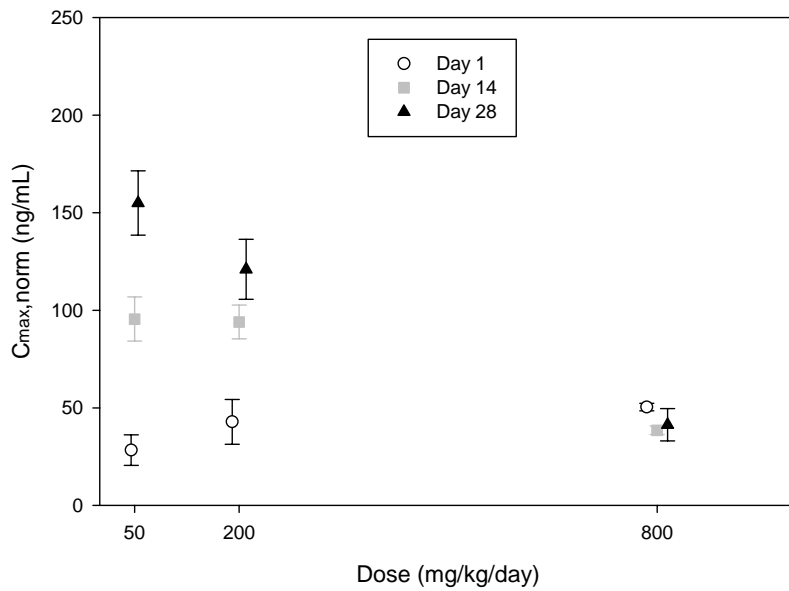

Male

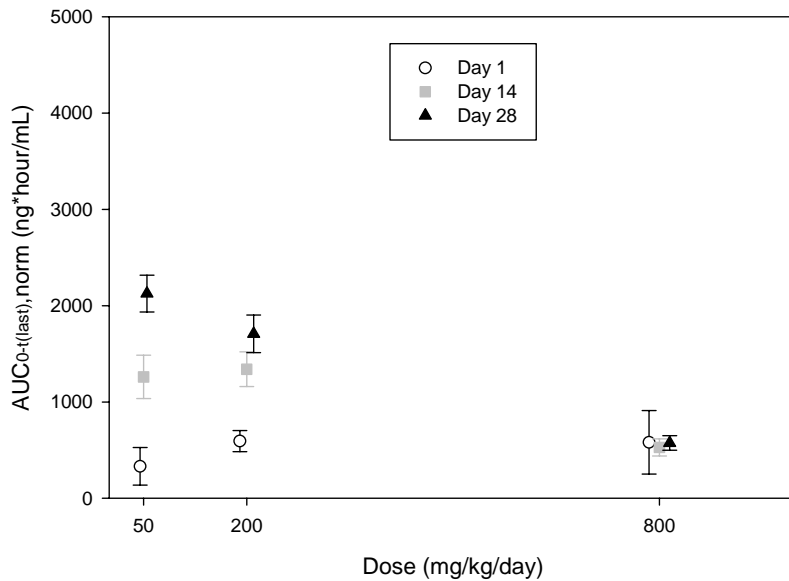

Fexinidazole  
 Toxicokinetic Report for the study No. 0504-2007

**Figure 21.** Mean ( $\pm$ SD) normalized  $C_{max}$  (upper panel) and  $AUC_{0-t(last)}$  (on Day 28 AUC within 24 hours, lower panel) of the sulfone derivative after single and repeated oral 50, 200 and 800 mg/kg/day of Fexinidazole in female Sprague Dawley rats.

Female

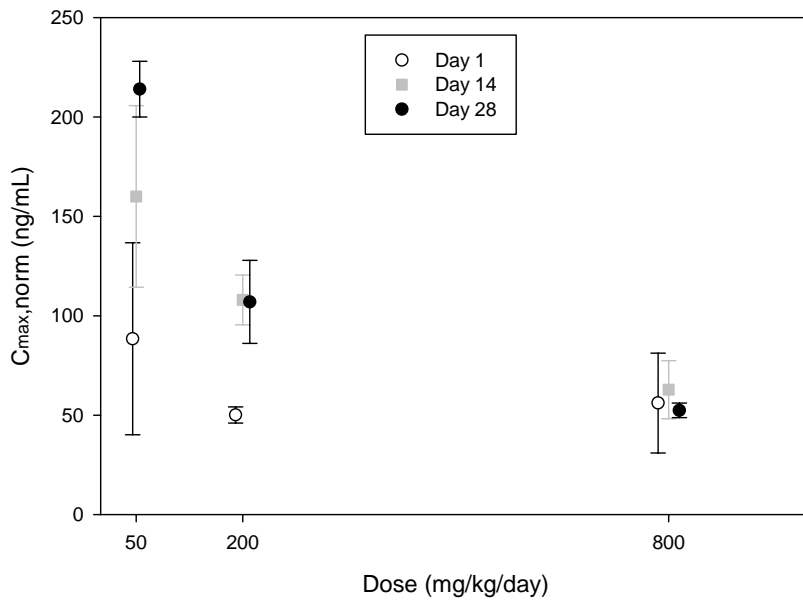

Female

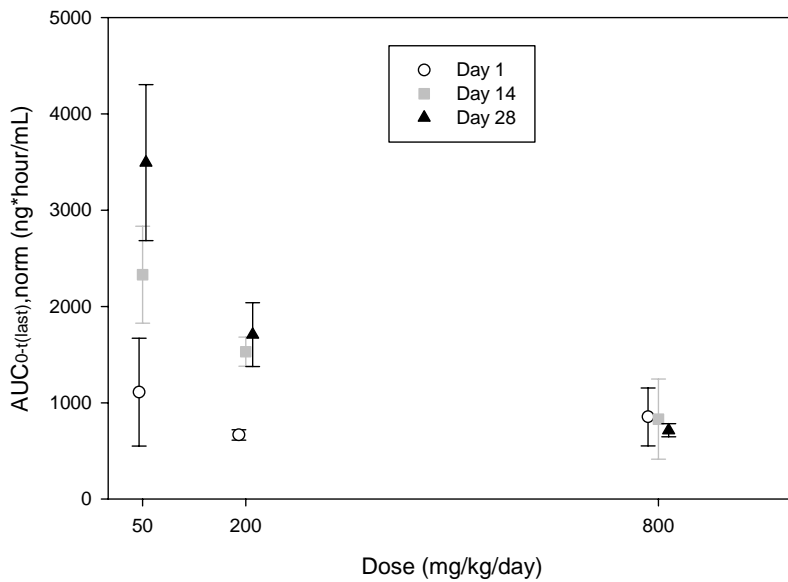

Fexinidazole  
Toxicokinetic Report for the study No. 0504-2007

---

## **APPENDICES**

Appendix 1. Individual plasma concentrations

Fexinidazole  
Toxicokinetic Report for the study No. 0504-2007

**Table 1A1.** Individual plasma concentrations (ng/mL) of Fexinidazole and sulfoxide and sulfone metabolites after single and repeated oral administrations of the vehicle in male and female Sprague Dawley rats.

| Day 1        |         |         |         |         |         |         |
|--------------|---------|---------|---------|---------|---------|---------|
| Fexinidazole |         |         |         |         |         |         |
| Time (hour)  | M       |         |         | F       |         |         |
|              | ID 2835 | ID 2836 | ID 2837 | ID 2847 | ID 2848 | ID 2849 |
| Pre-dose     | <5      | <5      | <5      | <5      | <5      | <5      |
| 2            | <5      | <5      | <5      | <5      | <5      | <5      |
| Sulfoxide    |         |         |         |         |         |         |
| Pre-dose     | <25     | <25     | <25     | <25     | <25     | <25     |
| 2            | <25     | <25     | <25     | <25     | <25     | <25     |
| Sulfone      |         |         |         |         |         |         |
| Pre-dose     | <25     | <25     | <25     | <25     | <25     | <25     |
| 2            | <25     | <25     | <25     | <25     | <25     | <25     |
| Day 14       |         |         |         |         |         |         |
| Fexinidazole |         |         |         |         |         |         |
| Time (hour)  | M       |         |         | F       |         |         |
|              | ID 2835 | ID 2836 | ID 2837 | ID 2847 | ID 2848 | ID 2849 |
| Pre-dose     | <5      | <5      | <5      | <5      | <5      | <5      |
| 2            | <5      | <5      | <5      | <5      | <5      | <5      |
| Sulfoxide    |         |         |         |         |         |         |
| Pre-dose     | <25     | <25     | <25     | <25     | <25     | <25     |
| 2            | <25     | <25     | <25     | <25     | 29.4    | <25     |
| Sulfone      |         |         |         |         |         |         |
| Pre-dose     | <25     | <25     | <25     | <25     | <25     | <25     |
| 2            | <25     | <25     | <25     | <25     | 32.7    | <25     |
| Day 28       |         |         |         |         |         |         |
| Fexinidazole |         |         |         |         |         |         |
| Time (hour)  | M       |         |         | F       |         |         |
|              | ID 2835 | ID 2836 | ID 2837 | ID 2847 | ID 2848 | ID 2849 |
| Pre-dose     | <5      | <5      | <5      | 9.61    | <5      | <5      |
| 2            | <5      | <5      | <5      | <5      | <5      | <5      |
| Sulfoxide    |         |         |         |         |         |         |
| Pre-dose     | <25     | <25     | <25     | <25     | <25     | <25     |
| 2            | <25     | <25     | <25     | <25     | <25     | <25     |
| Sulfone      |         |         |         |         |         |         |
| Pre-dose     | <25     | <25     | <25     | <25     | <25     | <25     |
| 2            | <25     | <25     | <25     | <25     | <25     | <25     |

Fexinidazole  
Toxicokinetic Report for the study No. 0504-2007

**Table 2A1.** Day 1 individual and mean ( $\pm$ SD, %CV) plasma concentrations (ng/mL) of Fexinidazole and sulfoxide and sulfone metabolites after oral 50 mg/kg/day of Fexinidazole in male Sprague Dawley rats.

| Fexinidazole                                                                       |         |         |         |      |      |     |
|------------------------------------------------------------------------------------|---------|---------|---------|------|------|-----|
| Time (hour)                                                                        | ID 2838 | ID 2839 | ID 2840 | Mean | SD   | %CV |
| 0                                                                                  | <5      | <5      | <5      | N/A  | N/A  | N/A |
| 0.5                                                                                | 25.7    | 22.3    | 47.7    | 31.9 | 13.8 | 43  |
| 1                                                                                  | 35.5    | 24.3    | 56.9    | 38.9 | 16.6 | 43  |
| 2                                                                                  | 35.5    | 22      | 53.1    | 36.9 | 15.6 | 42  |
| 4                                                                                  | 23.2    | 13.4    | 33.7    | 23.4 | 10.2 | 44  |
| 8                                                                                  | 10.8    | <5      | 13.4    | 8.07 | 7.11 | 88  |
| 24                                                                                 | <5      | <5      | <5      | N/A  | N/A  | N/A |
| Sulfoxide                                                                          |         |         |         |      |      |     |
| Time (hour)                                                                        | ID 2838 | ID 2839 | ID 2840 | Mean | SD   | %CV |
| 0                                                                                  | <25     | <25     | <25     | N/A  | N/A  | N/A |
| 0.5                                                                                | 884     | 946     | 1370    | 1070 | 265  | 25  |
| 1                                                                                  | 1270    | 1120    | 1810    | 1400 | 363  | 26  |
| 2                                                                                  | 1450    | 1060    | 1940    | 1480 | 441  | 30  |
| 4                                                                                  | 1130    | 640     | 1330    | 1030 | 355  | 35  |
| 8                                                                                  | 489     | 162     | 468     | 373  | 183  | 49  |
| 24                                                                                 | <25     | <25     | <25     | N/A  | N/A  | N/A |
| Sulfone                                                                            |         |         |         |      |      |     |
| Time (hour)                                                                        | ID 2838 | ID 2839 | ID 2840 | Mean | SD   | %CV |
| 0                                                                                  | <25     | <25     | <25     | N/A  | N/A  | N/A |
| 0.5                                                                                | 119     | 161     | 167     | 149  | 26.2 | 18  |
| 1                                                                                  | 308     | 331     | 421     | 353  | 59.7 | 17  |
| 2                                                                                  | 611     | 664     | 847     | 707  | 124  | 18  |
| 4                                                                                  | 1130    | 1000    | 1450    | 1190 | 232  | 20  |
| 8                                                                                  | 1470    | 627     | 1780    | 1290 | 597  | 46  |
| 24                                                                                 | 47.6    | <25     | 62.4    | 36.7 | 32.6 | 89  |
| Estimates of mean based on approximation that values below LLOQ are equal to zero. |         |         |         |      |      |     |
| N/A: not applicable.                                                               |         |         |         |      |      |     |



Fexinidazole  
Toxicokinetic Report for the study No. 0504-2007

**Table 3A1.** Day 1 individual and mean ( $\pm$ SD, %CV) plasma concentrations (ng/mL) of Fexinidazole and sulfoxide and sulfone metabolites after oral 50 mg/kg/day of Fexinidazole in female Sprague Dawley rats.

| Fexinidazole |         |         |         |      |      |     |
|--------------|---------|---------|---------|------|------|-----|
| Time (hour)  | ID 2850 | ID 2851 | ID 2852 | Mean | SD   | %CV |
| Pre-dose     | <5      | <5      | <5      | N/A  | N/A  | N/A |
| 0.5          | 134     | 168     | 73.2    | 125  | 48   | 38  |
| 1            | 182     | 146     | 77.6    | 135  | 53   | 39  |
| 2            | 149     | 144     | 91.5    | 128  | 31.9 | 25  |
| 4            | 135     | 90      | 95.6    | 107  | 24.5 | 23  |
| 8            | 45.1    | 28.7    | 50      | 41.3 | 11.2 | 27  |
| 24           | <5      | <5      | <5      | N/A  | N/A  | N/A |
| Sulfoxide    |         |         |         |      |      |     |
| Time (hour)  | ID 2850 | ID 2851 | ID 2852 | Mean | SD   | %CV |
| Pre-dose     | <25     | <25     | <25     | N/A  | N/A  | N/A |
| 0.5          | 2760    | 2670    | 1700    | 2380 | 588  | 25  |
| 1            | 4100    | 2730    | 2120    | 2980 | 1010 | 34  |
| 2            | 4200    | 3960    | 2580    | 3580 | 874  | 24  |
| 4            | 4520    | 3200    | 3200    | 3640 | 762  | 21  |
| 8            | 2420    | 1250    | 1530    | 1730 | 611  | 35  |
| 24           | <25     | <25     | <25     | N/A  | N/A  | N/A |
| Sulfone      |         |         |         |      |      |     |
| Time (hour)  | ID 2850 | ID 2851 | ID 2852 | Mean | SD   | %CV |
| Pre-dose     | <25     | <25     | <25     | N/A  | N/A  | N/A |
| 0.5          | 277     | 225     | 166     | 223  | 55.5 | 25  |
| 1            | 803     | 398     | 392     | 531  | 236  | 44  |
| 2            | 1750    | 1080    | 800     | 1210 | 488  | 40  |
| 4            | 3640    | 2080    | 1960    | 2560 | 937  | 37  |
| 8            | 7190    | 2830    | 3230    | 4420 | 2410 | 55  |
| 24           | 243     | 115     | 242     | 200  | 73.6 | 37  |

N/A: not applicable.

Fexinidazole  
Toxicokinetic Report for the study No. 0504-2007

**Table 4A1.** Day 14 individual and mean ( $\pm$ SD, %CV) plasma concentrations (ng/mL) of Fexinidazole and sulfoxide and sulfone metabolites after oral 50 mg/kg/day of Fexinidazole in male Sprague Dawley rats.

| Fexinidazole                                                                                                                                                                                                                                                             |         |         |         |       |      |     |
|--------------------------------------------------------------------------------------------------------------------------------------------------------------------------------------------------------------------------------------------------------------------------|---------|---------|---------|-------|------|-----|
| Time (hour)                                                                                                                                                                                                                                                              | ID 2838 | ID 2839 | ID 2840 | Mean  | SD   | %CV |
| Pre-dose                                                                                                                                                                                                                                                                 | <5      | <5      | 12.7    | 4.23* | 7.33 | 173 |
| 0.5                                                                                                                                                                                                                                                                      | 34      | 14.6    | 50.7    | 33.1  | 18.1 | 55  |
| 1                                                                                                                                                                                                                                                                        | 67.1    | 31.6    | 65.8    | 54.8  | 20.1 | 37  |
| 2                                                                                                                                                                                                                                                                        | 70.9    | 42.2    | 59.8    | 57.6  | 14.5 | 25  |
| 4                                                                                                                                                                                                                                                                        | 79      | 32.3    | 65.6    | 59    | 24   | 41  |
| 8                                                                                                                                                                                                                                                                        | 15.4    | 6.17    | 12.4    | 11.3  | 4.71 | 42  |
| 24                                                                                                                                                                                                                                                                       | <5      | <5      | <5      | N/A   | N/A  | N/A |
| Sulfoxide                                                                                                                                                                                                                                                                |         |         |         |       |      |     |
| Time (hour)                                                                                                                                                                                                                                                              | ID 2838 | ID 2839 | ID 2840 | Mean  | SD   | %CV |
| Pre-dose                                                                                                                                                                                                                                                                 | 165     | 50.2    | 417     | 211   | 188  | 89  |
| 0.5                                                                                                                                                                                                                                                                      | 1390    | 759     | 1850    | 1330  | 548  | 41  |
| 1                                                                                                                                                                                                                                                                        | 2410    | 1400    | 2150    | 1990  | 524  | 26  |
| 2                                                                                                                                                                                                                                                                        | 2310    | 1830    | 2110    | 2080  | 241  | 12  |
| 4                                                                                                                                                                                                                                                                        | 2820    | 1080    | 1800    | 1900  | 874  | 46  |
| 8                                                                                                                                                                                                                                                                        | 413     | 221     | 285     | 306   | 97.8 | 32  |
| 24                                                                                                                                                                                                                                                                       | <25     | <25     | 36.8    | 12.3* | 21.2 | 172 |
| Sulfone                                                                                                                                                                                                                                                                  |         |         |         |       |      |     |
| Time (hour)                                                                                                                                                                                                                                                              | ID 2838 | ID 2839 | ID 2840 | Mean  | SD   | %CV |
| Pre-dose                                                                                                                                                                                                                                                                 | 2440    | 1230    | 1630    | 1770  | 616  | 35  |
| 0.5                                                                                                                                                                                                                                                                      | 2100    | 1270    | 2050    | 1810  | 465  | 26  |
| 1                                                                                                                                                                                                                                                                        | 2750    | 1690    | 2290    | 2240  | 532  | 24  |
| 2                                                                                                                                                                                                                                                                        | 3290    | 2670    | 3160    | 3040  | 327  | 11  |
| 4                                                                                                                                                                                                                                                                        | 5110    | 4120    | 5090    | 4770  | 566  | 12  |
| 8                                                                                                                                                                                                                                                                        | 4690    | 3230    | 3760    | 3890  | 739  | 19  |
| 24                                                                                                                                                                                                                                                                       | 374     | 60.3    | 288     | 241   | 162  | 67  |
| <p>Estimates of mean based on approximation that values below LLOQ are equal to zero.<br/>For values marked *, more than half of the individual levels were below LLOQ;<br/>descriptive statistics was reported even if strongly biased.</p> <p>N/A: not applicable.</p> |         |         |         |       |      |     |

Fexinidazole  
Toxicokinetic Report for the study No. 0504-2007

**Table 5A1.** Day 14 individual and mean ( $\pm$ SD, %CV) plasma concentrations (ng/mL) of Fexinidazole and sulfoxide and sulfone metabolites after oral 50 mg/kg/day of Fexinidazole in female Sprague Dawley rats.

| Fexinidazole |         |         |         |      |      |     |
|--------------|---------|---------|---------|------|------|-----|
| Time (hour)  | ID 2850 | ID 2851 | ID 2852 | Mean | SD   | %CV |
| Pre-dose     | <5      | <5      | <5      | N/A  | N/A  | N/A |
| 0.5          | 263     | 395     | 152     | 270  | 122  | 45  |
| 1            | 288     | 278     | 201     | 256  | 47.6 | 19  |
| 2            | 292     | 220     | 213     | 242  | 43.7 | 18  |
| 4            | 162     | 130     | 143     | 145  | 16.1 | 11  |
| 8            | 106     | 82.2    | 94.4    | 94.2 | 11.9 | 13  |
| 24           | <5      | <5      | <5      | N/A  | N/A  | N/A |
| Sulfoxide    |         |         |         |      |      |     |
| Time (hour)  | ID 2850 | ID 2851 | ID 2852 | Mean | SD   | %CV |
| Pre-dose     | <25     | <25     | <25     | N/A  | N/A  | N/A |
| 0.5          | 6610    | 6870    | 6100    | 6530 | 392  | 6   |
| 1            | 7640    | 7450    | 7360    | 7480 | 143  | 2   |
| 2            | 8750    | 7720    | 8120    | 8200 | 519  | 6   |
| 4            | 7590    | 5630    | 5760    | 6330 | 1100 | 17  |
| 8            | 3850    | 2820    | 3790    | 3490 | 578  | 17  |
| 24           | <25     | <25     | <25     | N/A  | N/A  | N/A |
| Sulfone      |         |         |         |      |      |     |
| Time (hour)  | ID 2850 | ID 2851 | ID 2852 | Mean | SD   | %CV |
| Pre-dose     | 266     | 252     | 475     | 331  | 125  | 38  |
| 0.5          | 987     | 817     | 1140    | 981  | 162  | 17  |
| 1            | 2050    | 1550    | 1940    | 1850 | 263  | 14  |
| 2            | 4350    | 3060    | 3930    | 3780 | 658  | 17  |
| 4            | 8310    | 4940    | 6680    | 6640 | 1690 | 26  |
| 8            | 10000   | 5500    | 8440    | 7980 | 2280 | 29  |
| 24           | 614     | 1650    | 1200    | 1150 | 519  | 45  |

N/A: not applicable.

Fexinidazole  
 Toxicokinetic Report for the study No. 0504-2007

**Table 6A1.** Day 28 individual and mean ( $\pm$ SD, %CV) plasma concentrations (ng/mL) of Fexinidazole and sulfoxide and sulfone metabolites after oral 50 mg/kg/day of Fexinidazole in male Sprague Dawley rats.

| Fexinidazole                                                                                                                                                                                                                                                |         |         |         |       |      |     |
|-------------------------------------------------------------------------------------------------------------------------------------------------------------------------------------------------------------------------------------------------------------|---------|---------|---------|-------|------|-----|
| Time (hour)                                                                                                                                                                                                                                                 | ID 2838 | ID 2839 | ID 2840 | Mean  | SD   | %CV |
| Pre-dose                                                                                                                                                                                                                                                    | 22.8    | 7.43    | 13      | 14.4  | 7.78 | 54  |
| 1                                                                                                                                                                                                                                                           | 87.9    | 51.9    | 97.6    | 79.1  | 24.1 | 31  |
| 2                                                                                                                                                                                                                                                           | 124     | 80.8    | 123     | 109   | 24.7 | 23  |
| 4                                                                                                                                                                                                                                                           | 148     | 105     | 145     | 133   | 24   | 18  |
| 8                                                                                                                                                                                                                                                           | 64.9    | 63.4    | 40      | 56.1  | 14   | 25  |
| 24                                                                                                                                                                                                                                                          | <5      | <5      | 7.99    | 2.66* | 4.61 | 173 |
| 48                                                                                                                                                                                                                                                          | <5      | <5      | <5      | N/A   | N/A  | N/A |
| 72                                                                                                                                                                                                                                                          | <5      | <5      | <5      | N/A   | N/A  | N/A |
| Sulfoxide                                                                                                                                                                                                                                                   |         |         |         |       |      |     |
| Time (hour)                                                                                                                                                                                                                                                 | ID 2838 | ID 2839 | ID 2840 | Mean  | SD   | %CV |
| Pre-dose                                                                                                                                                                                                                                                    | 742     | 226     | 365     | 444   | 267  | 60  |
| 1                                                                                                                                                                                                                                                           | 2790    | 2750    | 3010    | 2850  | 140  | 5   |
| 2                                                                                                                                                                                                                                                           | 4170    | 3770    | 3890    | 3940  | 205  | 5   |
| 4                                                                                                                                                                                                                                                           | 4820    | 3180    | 5000    | 4330  | 1000 | 23  |
| 8                                                                                                                                                                                                                                                           | 1680    | 1930    | 1320    | 1640  | 307  | 19  |
| 24                                                                                                                                                                                                                                                          | <25     | <25     | 261     | 87*   | 151  | 174 |
| 48                                                                                                                                                                                                                                                          | <25     | <25     | 26.5    | 8.83* | 15.3 | 173 |
| 72                                                                                                                                                                                                                                                          | <25     | <25     | <25     | N/A   | N/A  | N/A |
| Sulfone                                                                                                                                                                                                                                                     |         |         |         |       |      |     |
| Time (hour)                                                                                                                                                                                                                                                 | ID 2838 | ID 2839 | ID 2840 | Mean  | SD   | %CV |
| Pre-dose                                                                                                                                                                                                                                                    | 1240    | 750     | 851     | 947   | 259  | 27  |
| 1                                                                                                                                                                                                                                                           | 1930    | 1900    | 2000    | 1940  | 51.3 | 3   |
| 2                                                                                                                                                                                                                                                           | 3330    | 3530    | 3570    | 3480  | 129  | 4   |
| 4                                                                                                                                                                                                                                                           | 6170    | 5700    | 8710    | 6860  | 1620 | 24  |
| 8                                                                                                                                                                                                                                                           | 7260    | 7280    | 7700    | 7410  | 248  | 3   |
| 24                                                                                                                                                                                                                                                          | 533     | 171     | 736     | 480   | 286  | 60  |
| 48                                                                                                                                                                                                                                                          | 63.7    | 25.6    | 167     | 85.4  | 73.2 | 86  |
| 72                                                                                                                                                                                                                                                          | <25     | <25     | <25     | N/A   | N/A  | N/A |
| Estimates of mean based on approximation that values below LLOQ are equal to zero.<br>For values marked *, more than half of the individual levels were below LLOQ;<br>descriptive statistics was reported even if strongly biased.<br>N/A: not applicable. |         |         |         |       |      |     |

Fexinidazole  
 Toxicokinetic Report for the study No. 0504-2007

**Table 7A1.** Day 28 individual and mean ( $\pm$ SD, %CV) plasma concentrations (ng/mL) of Fexinidazole and sulfoxide and sulfone metabolites after oral 50 mg/kg/day of Fexinidazole in female Sprague Dawley rats.

| Fexinidazole                                                                                                                                                                                                                                                |         |         |         |       |      |     |
|-------------------------------------------------------------------------------------------------------------------------------------------------------------------------------------------------------------------------------------------------------------|---------|---------|---------|-------|------|-----|
| Time (hour)                                                                                                                                                                                                                                                 | ID 2850 | ID 2851 | ID 2852 | Mean  | SD   | %CV |
| Pre-dose                                                                                                                                                                                                                                                    | <5      | <5      | 52.2    | 17.4* | 30.1 | 173 |
| 1                                                                                                                                                                                                                                                           | 216     | 214     | 835     | 422   | 358  | 85  |
| 2                                                                                                                                                                                                                                                           | 163     | 164     | 178     | 168   | 8.39 | 5   |
| 4                                                                                                                                                                                                                                                           | 165     | 107     | 146     | 139   | 29.6 | 21  |
| 8                                                                                                                                                                                                                                                           | 53      | 53.3    | 35.3    | 47.2  | 10.3 | 22  |
| 24                                                                                                                                                                                                                                                          | <5      | 41.3    | <5      | 13.8* | 23.8 | 173 |
| 48                                                                                                                                                                                                                                                          | <5      | 5.16    | <5      | 1.72* | 2.98 | 173 |
| 72                                                                                                                                                                                                                                                          | <5      | <5      | <5      | N/A   | N/A  | N/A |
| Sulfoxide                                                                                                                                                                                                                                                   |         |         |         |       |      |     |
| Time (hour)                                                                                                                                                                                                                                                 | ID 2850 | ID 2851 | ID 2852 | Mean  | SD   | %CV |
| Pre-dose                                                                                                                                                                                                                                                    | 47.3    | <25     | 2510    | 852   | 1440 | 169 |
| 1                                                                                                                                                                                                                                                           | 6050    | 8920    | 18900   | 11300 | 6740 | 60  |
| 2                                                                                                                                                                                                                                                           | 6420    | 6490    | 7300    | 6740  | 489  | 7   |
| 4                                                                                                                                                                                                                                                           | 6410    | 5120    | 5630    | 5720  | 650  | 11  |
| 8                                                                                                                                                                                                                                                           | 2330    | 2140    | 1590    | 2020  | 384  | 19  |
| 24                                                                                                                                                                                                                                                          | <25     | 1910    | <25     | 637*  | 1100 | 173 |
| 48                                                                                                                                                                                                                                                          | 44.6    | 64.2    | <25     | 36.3  | 32.9 | 91  |
| 72                                                                                                                                                                                                                                                          | <25     | 42.3    | <25     | 14.1* | 24.4 | 173 |
| Sulfone                                                                                                                                                                                                                                                     |         |         |         |       |      |     |
| Time (hour)                                                                                                                                                                                                                                                 | ID 2850 | ID 2851 | ID 2852 | Mean  | SD   | %CV |
| Pre-dose                                                                                                                                                                                                                                                    | 605     | 3640    | 5500    | 3250  | 2470 | 76  |
| 1                                                                                                                                                                                                                                                           | 2170    | 7820    | 7530    | 5840  | 3180 | 55  |
| 2                                                                                                                                                                                                                                                           | 3860    | 5270    | 8520    | 5880  | 2390 | 41  |
| 4                                                                                                                                                                                                                                                           | 7890    | 6990    | 10000   | 8290  | 1550 | 19  |
| 8                                                                                                                                                                                                                                                           | 10700   | 11400   | 9100    | 10400 | 1180 | 11  |
| 24                                                                                                                                                                                                                                                          | 871     | 2850    | 1570    | 1760  | 1000 | 57  |
| 48                                                                                                                                                                                                                                                          | 114     | 934     | 191     | 413   | 453  | 110 |
| 72                                                                                                                                                                                                                                                          | <25     | 1800    | <25     | 600*  | 1040 | 173 |
| Estimates of mean based on approximation that values below LLOQ are equal to zero.<br>For values marked *, more than half of the individual levels were below LLOQ;<br>descriptive statistics was reported even if strongly biased.<br>N/A: not applicable. |         |         |         |       |      |     |

Fexinidazole  
Toxicokinetic Report for the study No. 0504-2007

**Table 8A1.** Day 1 individual and mean ( $\pm$ SD, %CV) plasma concentrations (ng/mL) of Fexinidazole and sulfoxide and sulfone metabolites after oral 200 mg/kg/day of Fexinidazole in male Sprague Dawley rats.

| Fexinidazole                                                                                                                                                                                                                                                             |         |         |         |       |      |     |
|--------------------------------------------------------------------------------------------------------------------------------------------------------------------------------------------------------------------------------------------------------------------------|---------|---------|---------|-------|------|-----|
| Time (hour)                                                                                                                                                                                                                                                              | ID 2841 | ID 2842 | ID 2843 | Mean  | SD   | %CV |
| Pre-dose                                                                                                                                                                                                                                                                 | <5      | <5      | <5      | N/A   | N/A  | N/A |
| 0.5                                                                                                                                                                                                                                                                      | 54.1    | 207     | 62.5    | 108   | 86   | 80  |
| 1                                                                                                                                                                                                                                                                        | 96.2    | 238     | 63      | 132   | 92.9 | 70  |
| 2                                                                                                                                                                                                                                                                        | 176     | 256     | 61.4    | 164   | 97.8 | 60  |
| 4                                                                                                                                                                                                                                                                        | 128     | 163     | 41      | 111   | 62.8 | 57  |
| 8                                                                                                                                                                                                                                                                        | 63.9    | 87      | 19.4    | 56.8  | 34.4 | 61  |
| 24                                                                                                                                                                                                                                                                       | 39.7    | <5      | <5      | 13.2* | 22.9 | 174 |
| Sulfoxide                                                                                                                                                                                                                                                                |         |         |         |       |      |     |
| Time (hour)                                                                                                                                                                                                                                                              | ID 2841 | ID 2842 | ID 2843 | Mean  | SD   | %CV |
| Pre-dose                                                                                                                                                                                                                                                                 | <25     | <25     | <25     | N/A   | N/A  | N/A |
| 0.5                                                                                                                                                                                                                                                                      | 2410    | 5150    | 7460    | 5010  | 2530 | 51  |
| 1                                                                                                                                                                                                                                                                        | 4230    | 7120    | 10100   | 7150  | 2940 | 41  |
| 2                                                                                                                                                                                                                                                                        | 7950    | 9810    | 12200   | 9990  | 2130 | 21  |
| 4                                                                                                                                                                                                                                                                        | 7070    | 7240    | 11200   | 8500  | 2340 | 28  |
| 8                                                                                                                                                                                                                                                                        | 3270    | 3480    | 6610    | 4450  | 1870 | 42  |
| 24                                                                                                                                                                                                                                                                       | 1850    | 116     | <25     | 655   | 1040 | 159 |
| Sulfone                                                                                                                                                                                                                                                                  |         |         |         |       |      |     |
| Time (hour)                                                                                                                                                                                                                                                              | ID 2841 | ID 2842 | ID 2843 | Mean  | SD   | %CV |
| Pre-dose                                                                                                                                                                                                                                                                 | <25     | <25     | <25     | N/A   | N/A  | N/A |
| 0.5                                                                                                                                                                                                                                                                      | 303     | 543     | 796     | 547   | 247  | 45  |
| 1                                                                                                                                                                                                                                                                        | 830     | 1330    | 1760    | 1310  | 465  | 36  |
| 2                                                                                                                                                                                                                                                                        | 2770    | 3520    | 4280    | 3520  | 755  | 21  |
| 4                                                                                                                                                                                                                                                                        | 5370    | 5650    | 7690    | 6240  | 1270 | 20  |
| 8                                                                                                                                                                                                                                                                        | 6600    | 7950    | 11100   | 8550  | 2310 | 27  |
| 24                                                                                                                                                                                                                                                                       | 2340    | 404     | 228     | 991   | 1170 | 118 |
| <p>Estimates of mean based on approximation that values below LLOQ are equal to zero.<br/>For values marked *, more than half of the individual levels were below LLOQ;<br/>descriptive statistics was reported even if strongly biased.</p> <p>N/A: not applicable.</p> |         |         |         |       |      |     |

Fexinidazole  
Toxicokinetic Report for the study No. 0504-2007

**Table 9A1.** Day 1 individual and mean ( $\pm$ SD, %CV) plasma concentrations (ng/mL) of Fexinidazole and sulfoxide and sulfone metabolites after oral 200 mg/kg/day of Fexinidazole in female Sprague Dawley rats.

| Fexinidazole                                                                                                                                                                                                                                                             |         |         |         |       |      |     |
|--------------------------------------------------------------------------------------------------------------------------------------------------------------------------------------------------------------------------------------------------------------------------|---------|---------|---------|-------|------|-----|
| Time (hour)                                                                                                                                                                                                                                                              | ID 2853 | ID 2854 | ID 2855 | Mean  | SD   | %CV |
| Pre-dose                                                                                                                                                                                                                                                                 | <5      | <5      | <5      | N/A   | N/A  | N/A |
| 0.5                                                                                                                                                                                                                                                                      | 761     | 415     | 412     | 529   | 201  | 38  |
| 1                                                                                                                                                                                                                                                                        | 732     | 446     | 376     | 518   | 189  | 37  |
| 2                                                                                                                                                                                                                                                                        | 830     | 502     | 408     | 580   | 222  | 38  |
| 4                                                                                                                                                                                                                                                                        | 454     | 569     | 283     | 435   | 144  | 33  |
| 8                                                                                                                                                                                                                                                                        | 156     | 259     | 142     | 186   | 63.9 | 34  |
| 24                                                                                                                                                                                                                                                                       | <5      | <5      | <5      | N/A   | N/A  | N/A |
| Sulfoxide                                                                                                                                                                                                                                                                |         |         |         |       |      |     |
| Time (hour)                                                                                                                                                                                                                                                              | ID 2853 | ID 2854 | ID 2855 | Mean  | SD   | %CV |
| Pre-dose                                                                                                                                                                                                                                                                 | <25     | <25     | <25     | N/A   | N/A  | N/A |
| 0.5                                                                                                                                                                                                                                                                      | 8460    | 5070    | 6700    | 6740  | 1700 | 25  |
| 1                                                                                                                                                                                                                                                                        | 10900   | 6760    | 9680    | 9110  | 2130 | 23  |
| 2                                                                                                                                                                                                                                                                        | 13400   | 8910    | 11500   | 11300 | 2250 | 20  |
| 4                                                                                                                                                                                                                                                                        | 12400   | 13500   | 10600   | 12200 | 1460 | 12  |
| 8                                                                                                                                                                                                                                                                        | 6150    | 8310    | 5450    | 6640  | 1490 | 22  |
| 24                                                                                                                                                                                                                                                                       | <25     | <25     | 38.7    | 12.9* | 22.3 | 173 |
| Sulfone                                                                                                                                                                                                                                                                  |         |         |         |       |      |     |
| Time (hour)                                                                                                                                                                                                                                                              | ID 2853 | ID 2854 | ID 2855 | Mean  | SD   | %CV |
| Pre-dose                                                                                                                                                                                                                                                                 | <25     | <25     | <25     | N/A   | N/A  | N/A |
| 0.5                                                                                                                                                                                                                                                                      | 585     | 323     | 684     | 531   | 187  | 35  |
| 1                                                                                                                                                                                                                                                                        | 1440    | 861     | 1830    | 1380  | 488  | 35  |
| 2                                                                                                                                                                                                                                                                        | 3680    | 2200    | 4160    | 3350  | 1020 | 30  |
| 4                                                                                                                                                                                                                                                                        | 7090    | 6370    | 8470    | 7310  | 1070 | 15  |
| 8                                                                                                                                                                                                                                                                        | 9290    | 9880    | 10900   | 10000 | 815  | 8   |
| 24                                                                                                                                                                                                                                                                       | 564     | 820     | 414     | 599   | 205  | 34  |
| <p>Estimates of mean based on approximation that values below LLOQ are equal to zero.<br/>For values marked *, more than half of the individual levels were below LLOQ;<br/>descriptive statistics was reported even if strongly biased.</p> <p>N/A: not applicable.</p> |         |         |         |       |      |     |

Fexinidazole  
Toxicokinetic Report for the study No. 0504-2007

**Table 10A1.** Day 14 individual and mean ( $\pm$ SD, %CV) plasma concentrations (ng/mL) of Fexinidazole and sulfoxide and sulfone metabolites after oral 200 mg/kg/day of Fexinidazole in male Sprague Dawley rats.

| Fexinidazole                                                                                                                                                                                                                        |         |         |         |       |      |     |
|-------------------------------------------------------------------------------------------------------------------------------------------------------------------------------------------------------------------------------------|---------|---------|---------|-------|------|-----|
| Time (hour)                                                                                                                                                                                                                         | ID 2841 | ID 2842 | ID 2843 | Mean  | SD   | %CV |
| Pre-dose                                                                                                                                                                                                                            | 65      | 12.5    | <5      | 25.8  | 34.5 | 134 |
| 0.5                                                                                                                                                                                                                                 | 188     | 169     | 33.1    | 130   | 84.5 | 65  |
| 1                                                                                                                                                                                                                                   | 202     | 262     | 56.6    | 174   | 106  | 61  |
| 2                                                                                                                                                                                                                                   | 355     | 367     | 87.2    | 270   | 158  | 59  |
| 4                                                                                                                                                                                                                                   | 277     | 381     | 52.4    | 237   | 168  | 71  |
| 8                                                                                                                                                                                                                                   | 160     | 129     | 20.7    | 103   | 73.1 | 71  |
| 24                                                                                                                                                                                                                                  | 23.3    | <5      | <5      | 7.77* | 13.5 | 174 |
| Sulfoxide                                                                                                                                                                                                                           |         |         |         |       |      |     |
| Time (hour)                                                                                                                                                                                                                         | ID 2841 | ID 2842 | ID 2843 | Mean  | SD   | %CV |
| Pre-dose                                                                                                                                                                                                                            | 2550    | 537     | <25     | 1030  | 1340 | 130 |
| 0.5                                                                                                                                                                                                                                 | 7950    | 6190    | 6180    | 6770  | 1020 | 15  |
| 1                                                                                                                                                                                                                                   | 7490    | 10100   | 9220    | 8940  | 1330 | 15  |
| 2                                                                                                                                                                                                                                   | 12600   | 11600   | 11900   | 12000 | 513  | 4   |
| 4                                                                                                                                                                                                                                   | 11200   | 14300   | 12400   | 12600 | 1560 | 12  |
| 8                                                                                                                                                                                                                                   | 5710    | 4860    | 5030    | 5200  | 450  | 9   |
| 24                                                                                                                                                                                                                                  | 704     | <25     | <25     | 235*  | 406  | 173 |
| Sulfone                                                                                                                                                                                                                             |         |         |         |       |      |     |
| Time (hour)                                                                                                                                                                                                                         | ID 2841 | ID 2842 | ID 2843 | Mean  | SD   | %CV |
| Pre-dose                                                                                                                                                                                                                            | 3340    | 849     | 403     | 1530  | 1580 | 103 |
| 0.5                                                                                                                                                                                                                                 | 6010    | 2100    | 1980    | 3360  | 2290 | 68  |
| 1                                                                                                                                                                                                                                   | 5900    | 4320    | 4030    | 4750  | 1010 | 21  |
| 2                                                                                                                                                                                                                                   | 12500   | 7880    | 8080    | 9490  | 2610 | 28  |
| 4                                                                                                                                                                                                                                   | 19300   | 17900   | 16800   | 18000 | 1250 | 7   |
| 8                                                                                                                                                                                                                                   | 19700   | 19900   | 16100   | 18600 | 2140 | 12  |
| 24                                                                                                                                                                                                                                  | 2420    | 543     | 237     | 1070  | 1180 | 110 |
| Estimates of mean based on approximation that values below LLOQ are equal to zero.<br>For values marked *, more than half of the individual levels were below LLOQ;<br>descriptive statistics was reported even if strongly biased. |         |         |         |       |      |     |



Fexinidazole  
Toxicokinetic Report for the study No. 0504-2007

**Table 11A1.** Day 14 individual and mean ( $\pm$ SD, %CV) plasma concentrations (ng/mL) of Fexinidazole and sulfoxide and sulfone metabolites after oral 200 mg/kg/day of Fexinidazole in female Sprague Dawley rats.

| Fexinidazole                                                                                                                                                                                                                                                             |         |         |         |       |      |     |
|--------------------------------------------------------------------------------------------------------------------------------------------------------------------------------------------------------------------------------------------------------------------------|---------|---------|---------|-------|------|-----|
| Time (hour)                                                                                                                                                                                                                                                              | ID 2853 | ID 2854 | ID 2855 | Mean  | SD   | %CV |
| Pre-dose                                                                                                                                                                                                                                                                 | <5      | <5      | <5      | N/A   | N/A  | N/A |
| 0.5                                                                                                                                                                                                                                                                      | 428     | 746     | 380     | 518   | 199  | 38  |
| 1                                                                                                                                                                                                                                                                        | 656     | 532     | 419     | 536   | 119  | 22  |
| 2                                                                                                                                                                                                                                                                        | 891     | 658     | 683     | 744   | 128  | 17  |
| 4                                                                                                                                                                                                                                                                        | 548     | 498     | 597     | 548   | 49.5 | 9   |
| 8                                                                                                                                                                                                                                                                        | 275     | 399     | 246     | 307   | 81.3 | 27  |
| 24                                                                                                                                                                                                                                                                       | <5      | <5      | <5      | N/A   | N/A  | N/A |
| Sulfoxide                                                                                                                                                                                                                                                                |         |         |         |       |      |     |
| Time (hour)                                                                                                                                                                                                                                                              | ID 2853 | ID 2854 | ID 2855 | Mean  | SD   | %CV |
| Pre-dose                                                                                                                                                                                                                                                                 | <25     | <25     | <25     | N/A   | N/A  | N/A |
| 0.5                                                                                                                                                                                                                                                                      | 11800   | 11300   | 10200   | 11100 | 819  | 7   |
| 1                                                                                                                                                                                                                                                                        | 17900   | 12700   | 12100   | 14200 | 3190 | 23  |
| 2                                                                                                                                                                                                                                                                        | 20000   | 14700   | 17400   | 17400 | 2650 | 15  |
| 4                                                                                                                                                                                                                                                                        | 18200   | 17600   | 18100   | 18000 | 321  | 2   |
| 8                                                                                                                                                                                                                                                                        | 11500   | 14500   | 8730    | 11600 | 2890 | 25  |
| 24                                                                                                                                                                                                                                                                       | <25     | <25     | 190     | 63.3* | 110  | 174 |
| Sulfone                                                                                                                                                                                                                                                                  |         |         |         |       |      |     |
| Time (hour)                                                                                                                                                                                                                                                              | ID 2853 | ID 2854 | ID 2855 | Mean  | SD   | %CV |
| Pre-dose                                                                                                                                                                                                                                                                 | 891     | 729     | 1210    | 943   | 245  | 26  |
| 0.5                                                                                                                                                                                                                                                                      | 1910    | 1700    | 2440    | 2020  | 381  | 19  |
| 1                                                                                                                                                                                                                                                                        | 4020    | 3030    | 4410    | 3820  | 711  | 19  |
| 2                                                                                                                                                                                                                                                                        | 7710    | 5980    | 9280    | 7660  | 1650 | 22  |
| 4                                                                                                                                                                                                                                                                        | 13400   | 13200   | 16800   | 14500 | 2020 | 14  |
| 8                                                                                                                                                                                                                                                                        | 20700   | 19600   | 24300   | 21500 | 2460 | 11  |
| 24                                                                                                                                                                                                                                                                       | 1790    | 6740    | 3350    | 3960  | 2530 | 64  |
| <p>Estimates of mean based on approximation that values below LLOQ are equal to zero.<br/>For values marked *, more than half of the individual levels were below LLOQ;<br/>descriptive statistics was reported even if strongly biased.</p> <p>N/A: not applicable.</p> |         |         |         |       |      |     |

Fexinidazole  
Toxicokinetic Report for the study No. 0504-2007

**Table 12A1.** Day 28 individual and mean ( $\pm$ SD, %CV) plasma concentrations (ng/mL) of Fexinidazole and sulfoxide and sulfone metabolites after oral 200 mg/kg/day of Fexinidazole in male Sprague Dawley rats.

| Fexinidazole                                                                                                                                                                                                                                                             |         |         |         |       |      |     |
|--------------------------------------------------------------------------------------------------------------------------------------------------------------------------------------------------------------------------------------------------------------------------|---------|---------|---------|-------|------|-----|
| Time (hour)                                                                                                                                                                                                                                                              | ID 2841 | ID 2842 | ID 2843 | Mean  | SD   | %CV |
| Pre-dose                                                                                                                                                                                                                                                                 | 30.7    | 29.6    | <5      | 20.1  | 17.4 | 87  |
| 1                                                                                                                                                                                                                                                                        | 311     | 239     | 77.5    | 209   | 120  | 57  |
| 2                                                                                                                                                                                                                                                                        | 248     | 261     | 100     | 203   | 89.4 | 44  |
| 4                                                                                                                                                                                                                                                                        | 261     | 353     | 99.1    | 238   | 129  | 54  |
| 8                                                                                                                                                                                                                                                                        | 196     | 293     | 31.2    | 173   | 132  | 76  |
| 24                                                                                                                                                                                                                                                                       | 82.7    | <5      | <5      | 27.6* | 47.7 | 173 |
| 48                                                                                                                                                                                                                                                                       | <5      | 18.8    | <5      | 6.27* | 10.9 | 174 |
| 72                                                                                                                                                                                                                                                                       | <5      | <5      | <5      | N/A   | N/A  | N/A |
| Sulfoxide                                                                                                                                                                                                                                                                |         |         |         |       |      |     |
| Time (hour)                                                                                                                                                                                                                                                              | ID 2841 | ID 2842 | ID 2843 | Mean  | SD   | %CV |
| Pre-dose                                                                                                                                                                                                                                                                 | 1120    | 170     | 253     | 514   | 526  | 102 |
| 1                                                                                                                                                                                                                                                                        | 9180    | 7840    | 13100   | 10000 | 2730 | 27  |
| 2                                                                                                                                                                                                                                                                        | 9300    | 9360    | 13200   | 10600 | 2230 | 21  |
| 4                                                                                                                                                                                                                                                                        | 8570    | 11500   | 14100   | 11400 | 2770 | 24  |
| 8                                                                                                                                                                                                                                                                        | 6230    | 8420    | 6480    | 7040  | 1200 | 17  |
| 24                                                                                                                                                                                                                                                                       | 3190    | 61.1    | <25     | 1080  | 1820 | 169 |
| 48                                                                                                                                                                                                                                                                       | 43.5    | 656     | <25     | 233   | 367  | 158 |
| 72                                                                                                                                                                                                                                                                       | <25     | <25     | <25     | N/A   | N/A  | N/A |
| Sulfone                                                                                                                                                                                                                                                                  |         |         |         |       |      |     |
| Time (hour)                                                                                                                                                                                                                                                              | ID 2841 | ID 2842 | ID 2843 | Mean  | SD   | %CV |
| Pre-dose                                                                                                                                                                                                                                                                 | 3690    | 1090    | 2080    | 2290  | 1310 | 57  |
| 1                                                                                                                                                                                                                                                                        | 8680    | 3990    | 7650    | 6770  | 2460 | 36  |
| 2                                                                                                                                                                                                                                                                        | 11900   | 6620    | 11900   | 10100 | 3050 | 30  |
| 4                                                                                                                                                                                                                                                                        | 17900   | 14500   | 23300   | 18600 | 4440 | 24  |
| 8                                                                                                                                                                                                                                                                        | 22200   | 22700   | 27700   | 24200 | 3040 | 13  |
| 24                                                                                                                                                                                                                                                                       | 5050    | 2060    | 686     | 2600  | 2230 | 86  |
| 48                                                                                                                                                                                                                                                                       | 572     | 985     | 96.1    | 551   | 445  | 81  |
| 72                                                                                                                                                                                                                                                                       | 63.2    | 170     | <25     | 77.7  | 85.9 | 111 |
| <p>Estimates of mean based on approximation that values below LLOQ are equal to zero.<br/>For values marked *, more than half of the individual levels were below LLOQ;<br/>descriptive statistics was reported even if strongly biased.</p> <p>N/A: not applicable.</p> |         |         |         |       |      |     |

Fexinidazole  
Toxicokinetic Report for the study No. 0504-2007

**Table 13A1.** Day 28 individual and mean ( $\pm$ SD, %CV) plasma concentrations (ng/mL) of Fexinidazole and sulfoxide and sulfone metabolites after oral 200 mg/kg/day of Fexinidazole in female Sprague Dawley rats.

| Fexinidazole                                                                                                                                                                                                                                                             |         |         |         |       |      |     |
|--------------------------------------------------------------------------------------------------------------------------------------------------------------------------------------------------------------------------------------------------------------------------|---------|---------|---------|-------|------|-----|
| Time (hour)                                                                                                                                                                                                                                                              | ID 2853 | ID 2854 | ID 2855 | Mean  | SD   | %CV |
| Pre-dose                                                                                                                                                                                                                                                                 | <5      | <5      | <5      | N/A   | N/A  | N/A |
| 1                                                                                                                                                                                                                                                                        | 886     | 465     | 803     | 718   | 223  | 31  |
| 2                                                                                                                                                                                                                                                                        | 943     | 962     | 390     | 765   | 325  | 43  |
| 4                                                                                                                                                                                                                                                                        | 675     | 575     | 279     | 510   | 206  | 40  |
| 8                                                                                                                                                                                                                                                                        | 352     | 262     | 138     | 251   | 107  | 43  |
| 24                                                                                                                                                                                                                                                                       | <5      | <5      | 64.8    | 21.6* | 37.4 | 173 |
| 48                                                                                                                                                                                                                                                                       | <5      | <5      | 12.7    | 4.23* | 7.33 | 173 |
| 72                                                                                                                                                                                                                                                                       | <5      | <5      | <5      | N/A   | N/A  | N/A |
| Sulfoxide                                                                                                                                                                                                                                                                |         |         |         |       |      |     |
| Time (hour)                                                                                                                                                                                                                                                              | ID 2853 | ID 2854 | ID 2855 | Mean  | SD   | %CV |
| Pre-dose                                                                                                                                                                                                                                                                 | <25     | <25     | 34.1    | 11.4* | 19.7 | 173 |
| 1                                                                                                                                                                                                                                                                        | 17300   | 13500   | 24000   | 18300 | 5320 | 29  |
| 2                                                                                                                                                                                                                                                                        | 21200   | 21800   | 13000   | 18700 | 4920 | 26  |
| 4                                                                                                                                                                                                                                                                        | 21100   | 18300   | 9910    | 16400 | 5820 | 36  |
| 8                                                                                                                                                                                                                                                                        | 14100   | 10700   | 5400    | 10100 | 4380 | 43  |
| 24                                                                                                                                                                                                                                                                       | <25     | <25     | 2960    | 987*  | 1710 | 173 |
| 48                                                                                                                                                                                                                                                                       | <25     | <25     | 604     | 201*  | 349  | 174 |
| 72                                                                                                                                                                                                                                                                       | <25     | <25     | <25     | N/A   | N/A  | N/A |
| Sulfone                                                                                                                                                                                                                                                                  |         |         |         |       |      |     |
| Time (hour)                                                                                                                                                                                                                                                              | ID 2853 | ID 2854 | ID 2855 | Mean  | SD   | %CV |
| Pre-dose                                                                                                                                                                                                                                                                 | 4120    | 1420    | 2690    | 2740  | 1350 | 49  |
| 1                                                                                                                                                                                                                                                                        | 4240    | 7110    | 17400   | 9580  | 6920 | 72  |
| 2                                                                                                                                                                                                                                                                        | 11300   | 9130    | 9520    | 9980  | 1160 | 12  |
| 4                                                                                                                                                                                                                                                                        | 18400   | 13700   | 14300   | 15500 | 2560 | 17  |
| 8                                                                                                                                                                                                                                                                        | 26200   | 19700   | 18400   | 21400 | 4180 | 20  |
| 24                                                                                                                                                                                                                                                                       | 8010    | 1680    | 10800   | 6830  | 4670 | 68  |
| 48                                                                                                                                                                                                                                                                       | 236     | 87.5    | 2730    | 1020  | 1480 | 145 |
| 72                                                                                                                                                                                                                                                                       | 39.2    | <25     | 232     | 90.4  | 124  | 137 |
| <p>Estimates of mean based on approximation that values below LLOQ are equal to zero.<br/>For values marked *, more than half of the individual levels were below LLOQ;<br/>descriptive statistics was reported even if strongly biased.</p> <p>N/A: not applicable.</p> |         |         |         |       |      |     |

Fexinidazole  
Toxicokinetic Report for the study No. 0504-2007

**Table 14A1.** Day 1 individual and mean ( $\pm$ SD, %CV) plasma concentrations (ng/mL) of Fexinidazole and sulfoxide and sulfone metabolites after oral 800 mg/kg/day of Fexinidazole in male Sprague Dawley rats.

| Fexinidazole                                       |         |         |                |       |      |     |
|----------------------------------------------------|---------|---------|----------------|-------|------|-----|
| Time (hour)                                        | ID 2844 | ID 2845 | ID 2846        | Mean  | SD   | %CV |
| Pre-dose                                           | <5      | <5      | <5             | N/A   | N/A  | N/A |
| 0.5                                                | 393     | 529     | 2760           | 1230  | 1330 | 108 |
| 1                                                  | 603     | 632     | 2320           | 1190  | 983  | 83  |
| 2                                                  | 805     | 868     | 1980           | 1220  | 661  | 54  |
| 4                                                  | 710     | 635     | 1410           | 918   | 427  | 47  |
| 8                                                  | 452     | 430     | 1070           | 651   | 363  | 56  |
| 24                                                 | 33.4    | 63.6    | <sup>(1)</sup> | 48.5  | 21.4 | 44  |
| Sulfoxide                                          |         |         |                |       |      |     |
| Time (hour)                                        | ID 2844 | ID 2845 | ID 2846        | Mean  | SD   | %CV |
| Pre-dose                                           | <25     | <25     | <25            | N/A   | N/A  | N/A |
| 0.5                                                | 11400   | 12100   | 15600          | 13000 | 2250 | 17  |
| 1                                                  | 19900   | 15000   | 19700          | 18200 | 2770 | 15  |
| 2                                                  | 25900   | 24300   | 34700          | 28300 | 5600 | 20  |
| 4                                                  | 36500   | 27200   | 32500          | 32100 | 4670 | 15  |
| 8                                                  | 27900   | 23600   | 34800          | 28800 | 5650 | 20  |
| 24                                                 | 1750    | 2880    |                | 2320  | 799  | 34  |
| Sulfone                                            |         |         |                |       |      |     |
| Time (hour)                                        | ID 2844 | ID 2845 | ID 2846        | Mean  | SD   | %CV |
| Pre-dose                                           | <25     | <25     | <25            | N/A   | N/A  | N/A |
| 0.5                                                | 1320    | 1520    | 1670           | 1500  | 176  | 12  |
| 1                                                  | 4330    | 3440    | 3970           | 3910  | 448  | 12  |
| 2                                                  | 9980    | 9800    | 10400          | 10100 | 308  | 3   |
| 4                                                  | 23600   | 20800   | 20600          | 21700 | 1680 | 8   |
| 8                                                  | 39500   | 42100   | 39300          | 40300 | 1560 | 4   |
| 24                                                 | 16000   | 15000   |                | 15500 | 707  | 5   |
| <sup>(1)</sup> Not available since the animal died |         |         |                |       |      |     |
| N/A: not applicable.                               |         |         |                |       |      |     |

Fexinidazole  
Toxicokinetic Report for the study No. 0504-2007

**Table 15A1.** Day 1 individual and mean ( $\pm$ SD, %CV) plasma concentrations (ng/mL) of Fexinidazole and sulfoxide and sulfone metabolites after oral 800 mg/kg/day of Fexinidazole in female Sprague Dawley rats.

| Fexinidazole |         |         |         |       |       |     |
|--------------|---------|---------|---------|-------|-------|-----|
| Time (hour)  | ID 2856 | ID 2857 | ID 2858 | Mean  | SD    | %CV |
| Pre-dose     | <5      | <5      | <5      | N/A   | N/A   | N/A |
| 0.5          | 1670    | 810     | 1100    | 1190  | 438   | 37  |
| 1            | 1330    | 1030    | 1470    | 1280  | 225   | 18  |
| 2            | 1690    | 1290    | 1140    | 1370  | 284   | 21  |
| 4            | 1250    | 1280    | 1200    | 1240  | 40.4  | 3   |
| 8            | 807     | 844     | 444     | 698   | 221   | 32  |
| 24           | 65.4    | 412     | 31.4    | 170   | 211   | 124 |
| Sulfoxide    |         |         |         |       |       |     |
| Time (hour)  | ID 2856 | ID 2857 | ID 2858 | Mean  | SD    | %CV |
| Pre-dose     | <25     | <25     | <25     | N/A   | N/A   | N/A |
| 0.5          | 12100   | 10900   | 16100   | 13000 | 2720  | 21  |
| 1            | 16300   | 16200   | 22100   | 18200 | 3380  | 19  |
| 2            | 23000   | 22500   | 23100   | 22900 | 321   | 1   |
| 4            | 28200   | 30300   | 33400   | 30600 | 2620  | 9   |
| 8            | 24700   | 28400   | 22800   | 25300 | 2850  | 11  |
| 24           | 2980    | 15600   | 1690    | 6760  | 7690  | 114 |
| Sulfone      |         |         |         |       |       |     |
| Time (hour)  | ID 2856 | ID 2857 | ID 2858 | Mean  | SD    | %CV |
| Pre-dose     | <25     | <25     | <25     | N/A   | N/A   | N/A |
| 0.5          | 1130    | 1060    | 1490    | 1230  | 231   | 19  |
| 1            | 2670    | 2870    | 4070    | 3200  | 757   | 24  |
| 2            | 7420    | 7490    | 9660    | 8190  | 1270  | 16  |
| 4            | 14800   | 18700   | 22200   | 18600 | 3700  | 20  |
| 8            | 29400   | 35000   | 37500   | 34000 | 4150  | 12  |
| 24           | 23800   | 67600   | 10600   | 34000 | 29800 | 88  |

N/A: not applicable.

Fexinidazole  
Toxicokinetic Report for the study No. 0504-2007

**Table 16A1.** Day 14 individual and mean ( $\pm$ SD, %CV) plasma concentrations (ng/mL) of Fexinidazole and sulfoxide and sulfone metabolites after oral 800 mg/kg/day of Fexinidazole in male Sprague Dawley rats.

| Fexinidazole                                                                                                                                                                                                                                                             |         |         |         |       |      |     |
|--------------------------------------------------------------------------------------------------------------------------------------------------------------------------------------------------------------------------------------------------------------------------|---------|---------|---------|-------|------|-----|
| Time (hour)                                                                                                                                                                                                                                                              | ID 2844 | ID 2845 | ID 2846 | Mean  | SD   | %CV |
| Pre-dose                                                                                                                                                                                                                                                                 | <5      | <5      | 8.15    | 2.72* | 4.71 | 173 |
| 0.5                                                                                                                                                                                                                                                                      | 249     | 231     | 167     | 216   | 43.1 | 20  |
| 1                                                                                                                                                                                                                                                                        | 310     | 296     | 198     | 268   | 61   | 23  |
| 2                                                                                                                                                                                                                                                                        | 584     | 551     | 352     | 496   | 126  | 25  |
| 4                                                                                                                                                                                                                                                                        | 678     | 496     | 467     | 547   | 114  | 21  |
| 8                                                                                                                                                                                                                                                                        | 319     | 146     | 201     | 222   | 88.4 | 40  |
| 24                                                                                                                                                                                                                                                                       | 53.8    | 15.6    | 5.28    | 24.9  | 25.6 | 103 |
| Sulfoxide                                                                                                                                                                                                                                                                |         |         |         |       |      |     |
| Time (hour)                                                                                                                                                                                                                                                              | ID 2844 | ID 2845 | ID 2846 | Mean  | SD   | %CV |
| Pre-dose                                                                                                                                                                                                                                                                 | 53.4    | <25     | 293     | 115   | 156  | 136 |
| 0.5                                                                                                                                                                                                                                                                      | 7970    | 8210    | 7720    | 7970  | 245  | 3   |
| 1                                                                                                                                                                                                                                                                        | 9530    | 11600   | 8900    | 10000 | 1410 | 14  |
| 2                                                                                                                                                                                                                                                                        | 16200   | 19400   | 13900   | 16500 | 2760 | 17  |
| 4                                                                                                                                                                                                                                                                        | 17800   | 14900   | 16000   | 16200 | 1460 | 9   |
| 8                                                                                                                                                                                                                                                                        | 9240    | 4590    | 8200    | 7340  | 2440 | 33  |
| 24                                                                                                                                                                                                                                                                       | 1710    | 515     | 152     | 792   | 815  | 103 |
| Sulfone                                                                                                                                                                                                                                                                  |         |         |         |       |      |     |
| Time (hour)                                                                                                                                                                                                                                                              | ID 2844 | ID 2845 | ID 2846 | Mean  | SD   | %CV |
| Pre-dose                                                                                                                                                                                                                                                                 | 869     | 394     | 4080    | 1780  | 2010 | 113 |
| 0.5                                                                                                                                                                                                                                                                      | 3570    | 3560    | 5650    | 4260  | 1200 | 28  |
| 1                                                                                                                                                                                                                                                                        | 5900    | 7500    | 7580    | 6990  | 948  | 14  |
| 2                                                                                                                                                                                                                                                                        | 14600   | 18700   | 15300   | 16200 | 2190 | 14  |
| 4                                                                                                                                                                                                                                                                        | 29400   | 29300   | 30500   | 29700 | 666  | 2   |
| 8                                                                                                                                                                                                                                                                        | 32700   | 21600   | 28800   | 27700 | 5630 | 20  |
| 24                                                                                                                                                                                                                                                                       | 6140    | 1580    | 1430    | 3050  | 2680 | 88  |
| <p>Estimates of mean based on approximation that values below LLOQ are equal to zero.<br/>For values marked *, more than half of the individual levels were below LLOQ;<br/>descriptive statistics was reported even if strongly biased.</p> <p>N/A: not applicable.</p> |         |         |         |       |      |     |

Fexinidazole  
Toxicokinetic Report for the study No. 0504-2007

**Table 17A1.** Day 14 individual and mean ( $\pm$ SD, %CV) plasma concentrations (ng/mL) of Fexinidazole and sulfoxide and sulfone metabolites after oral 800 mg/kg/day of Fexinidazole in female Sprague Dawley rats.

| Fexinidazole |         |         |                |       |       |     |
|--------------|---------|---------|----------------|-------|-------|-----|
| Time (hour)  | ID 2856 | ID 2857 | ID 2858        | Mean  | SD    | %CV |
| Pre-dose     | 6.94    | <5      | 100            | 35.6  | 55.8  | 157 |
| 0.5          | 624     | 371     | 2740           | 1250  | 1300  | 104 |
| 1            | 545     | 541     | 2110           | 1070  | 905   | 85  |
| 2            | 573     | 890     | 2260           | 1240  | 897   | 72  |
| 4            | 607     | 852     | 1960           | 1140  | 721   | 63  |
| 8            | 508     | 1070    | 1250           | 943   | 387   | 41  |
| 24           | 112     | 142     | <sup>(1)</sup> | 127   | 21.2  | 17  |
| Sulfoxide    |         |         |                |       |       |     |
| Time (hour)  | ID 2856 | ID 2857 | ID 2858        | Mean  | SD    | %CV |
| Pre-dose     | 304     | 40      | 6180           | 2170  | 3470  | 160 |
| 0.5          | 20000   | 14800   | 21200          | 18700 | 3400  | 18  |
| 1            | 22600   | 22200   | 26300          | 23700 | 2260  | 10  |
| 2            | 25100   | 34000   | 37600          | 32200 | 6430  | 20  |
| 4            | 22700   | 33800   | 37500          | 31300 | 7700  | 25  |
| 8            | 18400   | 32900   | 21800          | 24400 | 7580  | 31  |
| 24           | 5970    | 6770    |                | 6370  | 566   | 9   |
| Sulfone      |         |         |                |       |       |     |
| Time (hour)  | ID 2856 | ID 2857 | ID 2858        | Mean  | SD    | %CV |
| Pre-dose     | 4940    | 3900    | 15600          | 8150  | 6480  | 80  |
| 0.5          | 8180    | 5150    | 16900          | 10100 | 6100  | 60  |
| 1            | 12300   | 9150    | 19900          | 13800 | 5530  | 40  |
| 2            | 21200   | 20400   | 33300          | 25000 | 7230  | 29  |
| 4            | 30200   | 38700   | 49600          | 39500 | 9720  | 25  |
| 8            | 38500   | 61800   | 50400          | 50200 | 11700 | 23  |
| 24           | 19000   | 26800   |                | 22900 | 5520  | 24  |

<sup>(1)</sup> Not available since the animal died.

Fexinidazole  
Toxicokinetic Report for the study No. 0504-2007

**Table 18A1.** Day 28 individual and mean ( $\pm$ SD, %CV) plasma concentrations (ng/mL) of Fexinidazole and sulfoxide and sulfone metabolites after oral 800 mg/kg/day of Fexinidazole in male Sprague Dawley rats.

| Fexinidazole                                                                                                                                                                                                                                                             |         |         |         |       |      |     |
|--------------------------------------------------------------------------------------------------------------------------------------------------------------------------------------------------------------------------------------------------------------------------|---------|---------|---------|-------|------|-----|
| Time (hour)                                                                                                                                                                                                                                                              | ID 2844 | ID 2845 | ID 2846 | Mean  | SD   | %CV |
| Pre-dose                                                                                                                                                                                                                                                                 | 7.32    | 39.2    | 31.3    | 25.9  | 16.6 | 64  |
| 1                                                                                                                                                                                                                                                                        | 287     | 448     | 413     | 383   | 84.7 | 22  |
| 2                                                                                                                                                                                                                                                                        | 670     | 403     | 400     | 491   | 155  | 32  |
| 4                                                                                                                                                                                                                                                                        | 489     | 307     | 451     | 416   | 96   | 23  |
| 8                                                                                                                                                                                                                                                                        | 620     | 304     | 268     | 397   | 194  | 49  |
| 24                                                                                                                                                                                                                                                                       | <5      | <5      | <5      | N/A   | N/A  | N/A |
| 48                                                                                                                                                                                                                                                                       | 85.7    | 10.1    | 24.4    | 40.1  | 40.2 | 100 |
| 72                                                                                                                                                                                                                                                                       | <5      | <5      | <5      | N/A   | N/A  | N/A |
| Sulfoxide                                                                                                                                                                                                                                                                |         |         |         |       |      |     |
| Time (hour)                                                                                                                                                                                                                                                              | ID 2844 | ID 2845 | ID 2846 | Mean  | SD   | %CV |
| Pre-dose                                                                                                                                                                                                                                                                 | 168     | 1600    | 1260    | 1010  | 748  | 74  |
| 1                                                                                                                                                                                                                                                                        | 447     | 14200   | 17100   | 10600 | 8900 | 84  |
| 2                                                                                                                                                                                                                                                                        | 18100   | 13100   | 17400   | 16200 | 2710 | 17  |
| 4                                                                                                                                                                                                                                                                        | 12800   | 10300   | 16000   | 13000 | 2860 | 22  |
| 8                                                                                                                                                                                                                                                                        | 12800   | 10300   | 8480    | 10500 | 2170 | 21  |
| 24                                                                                                                                                                                                                                                                       | 37.9    | <25     | <25     | 12.6* | 21.9 | 174 |
| 48                                                                                                                                                                                                                                                                       | <25     | 310     | 887     | 399   | 450  | 113 |
| 72                                                                                                                                                                                                                                                                       | <25     | 106     | 33.7    | 46.6  | 54.2 | 116 |
| Sulfone                                                                                                                                                                                                                                                                  |         |         |         |       |      |     |
| Time (hour)                                                                                                                                                                                                                                                              | ID 2844 | ID 2845 | ID 2846 | Mean  | SD   | %CV |
| Pre-dose                                                                                                                                                                                                                                                                 | 3090    | 5260    | 9970    | 6110  | 3520 | 58  |
| 1                                                                                                                                                                                                                                                                        | 5490    | 13600   | 20600   | 13200 | 7560 | 57  |
| 2                                                                                                                                                                                                                                                                        | 20200   | 19200   | 25400   | 21600 | 3330 | 15  |
| 4                                                                                                                                                                                                                                                                        | 30100   | 27800   | 40500   | 32800 | 6770 | 21  |
| 8                                                                                                                                                                                                                                                                        | 30700   | 27500   | 33100   | 30400 | 2810 | 9   |
| 24                                                                                                                                                                                                                                                                       | 1060    | 576     | 1230    | 955   | 339  | 36  |
| 48                                                                                                                                                                                                                                                                       | 133     | 1210    | 3130    | 1490  | 1520 | 102 |
| 72                                                                                                                                                                                                                                                                       | 49.4    | 374     | 184     | 202   | 163  | 81  |
| <p>Estimates of mean based on approximation that values below LLOQ are equal to zero.<br/>For values marked *, more than half of the individual levels were below LLOQ;<br/>descriptive statistics was reported even if strongly biased.</p> <p>N/A: not applicable.</p> |         |         |         |       |      |     |



Fexinidazole  
Toxicokinetic Report for the study No. 0504-2007

**Table 19A1.** Day 28 individual and mean ( $\pm$ SD, %CV) plasma concentrations (ng/mL) of Fexinidazole and sulfoxide and sulfone metabolites after oral 800 mg/kg/day of Fexinidazole in female Sprague Dawley rats.

| Fexinidazole                                                                       |         |         |       |       |     |
|------------------------------------------------------------------------------------|---------|---------|-------|-------|-----|
| Time (hour)                                                                        | ID 2856 | ID 2857 | Mean  | SD    | %CV |
| Pre-dose                                                                           | 74.3    | 43.2    | 58.8  | 22    | 37  |
| 1                                                                                  | 210     | 812     | 511   | 426   | 83  |
| 2                                                                                  | 685     | 704     | 695   | 13.4  | 2   |
| 4                                                                                  | 580     | 805     | 693   | 159   | 23  |
| 8                                                                                  | 307     | 441     | 374   | 94.8  | 25  |
| 24                                                                                 | 36.5    | 22.9    | 29.7  | 9.62  | 32  |
| 48                                                                                 | <5      | 27.5    | 13.8  | 19.4  | 141 |
| 72                                                                                 | <5      | <5      | N/A   | N/A   | N/A |
| Sulfoxide                                                                          |         |         |       |       |     |
| Time (hour)                                                                        | ID 2856 | ID 2857 | Mean  | SD    | %CV |
| Pre-dose                                                                           | 5240    | 559     | 2900  | 3310  | 114 |
| 1                                                                                  | 7020    | 26100   | 16600 | 13500 | 81  |
| 2                                                                                  | 24400   | 22200   | 23300 | 1560  | 7   |
| 4                                                                                  | 23900   | 27300   | 25600 | 2400  | 9   |
| 8                                                                                  | 12900   | 16800   | 14900 | 2760  | 19  |
| 24                                                                                 | 1960    | 1360    | 1660  | 424   | 26  |
| 48                                                                                 | 291     | 1320    | 806   | 728   | 90  |
| 72                                                                                 | <25     | 185     | 92.5  | 131   | 142 |
| Sulfone                                                                            |         |         |       |       |     |
| Time (hour)                                                                        | ID 2856 | ID 2857 | Mean  | SD    | %CV |
| Pre-dose                                                                           | 13200   | 4010    | 8610  | 6500  | 76  |
| 1                                                                                  | 4550    | 11900   | 8230  | 5200  | 63  |
| 2                                                                                  | 26100   | 15800   | 21000 | 7280  | 35  |
| 4                                                                                  | 44000   | 30700   | 37400 | 9400  | 25  |
| 8                                                                                  | 30200   | 39800   | 35000 | 6790  | 19  |
| 24                                                                                 | 6030    | 10300   | 8170  | 3020  | 37  |
| 48                                                                                 | 1550    | 3250    | 2400  | 1200  | 50  |
| 72                                                                                 | 28.6    | 1810    | 919   | 1260  | 137 |
| Estimates of mean based on approximation that values below LLOQ are equal to zero. |         |         |       |       |     |
| N/A: not applicable.                                                               |         |         |       |       |     |

Fexinidazole  
Toxicokinetic Report for the study No. 0504-2007

## Appendix 2. In-Study Bioanalytical Validation Data

### Calibration data

| <b>Table 1A2. Analytical Performance: Back-Calculated Concentrations (ng/mL) of Fexinidazole Calibration Standard in Rat Plasma for Study Protocol 0504-2007.</b> |                              |                                 |                                 |                                 |                                |                                |                                |                                |                                 |
|-------------------------------------------------------------------------------------------------------------------------------------------------------------------|------------------------------|---------------------------------|---------------------------------|---------------------------------|--------------------------------|--------------------------------|--------------------------------|--------------------------------|---------------------------------|
| <b>Assay Date</b>                                                                                                                                                 | <b>Analytical Run Number</b> | <b>STD.1<br/>5.00<br/>ng/mL</b> | <b>STD.2<br/>10.0<br/>ng/mL</b> | <b>STD.3<br/>50.0<br/>ng/mL</b> | <b>STD.4<br/>100<br/>ng/mL</b> | <b>STD.5<br/>250<br/>ng/mL</b> | <b>STD.6<br/>500<br/>ng/mL</b> | <b>STD.7<br/>900<br/>ng/mL</b> | <b>STD.8<br/>1000<br/>ng/mL</b> |
| 31-Mar-2008                                                                                                                                                       | 1                            | 4.82                            | 9.5                             | 47.4                            | 101                            | 231                            | 479                            | 845                            | 1020                            |
|                                                                                                                                                                   |                              | 5.32                            | 9.84                            | 52.8                            | 113                            | 261                            | 452                            | *1070                          | 1100                            |
| 01-Apr-2008                                                                                                                                                       | 2                            | 5.08                            | 9.56                            | 47.7                            | 93.2                           | 253                            | 496                            | 880                            | 979                             |
|                                                                                                                                                                   |                              | 4.97                            | 10.4                            | 47.2                            | 103                            | 250                            | 533                            | 1030                           | 952                             |
| 01-Apr-2008                                                                                                                                                       | 3                            | 4.65                            | 11                              | 46.9                            | 98.7                           | 239                            | 494                            | 884                            | 878                             |
|                                                                                                                                                                   |                              | 5.1                             | 10.1                            | 52                              | 92.9                           | 236                            | 546                            | 1030                           | 1050                            |
| 02-Apr-2008                                                                                                                                                       | 4                            | 4.92                            | 11                              | 49.7                            | 91.7                           | 251                            | 470                            | 933                            | 979                             |
|                                                                                                                                                                   |                              | 4.76                            | 10.5                            | 47.9                            | 96.3                           | 265                            | 537                            | 889                            | 1000                            |
| 02-Apr-2008                                                                                                                                                       | 5                            | 4.83                            | 9.8                             | 50.3                            | 89.9                           | 244                            | 484                            | 783                            | 955                             |
|                                                                                                                                                                   |                              | 5.26                            | 9.76                            | 52.9                            | 103                            | 256                            | 511                            | 1030                           | 1070                            |
| 03-Apr-2008                                                                                                                                                       | 6                            | 4.9                             | 9.86                            | 47.1                            | 96                             | 270                            | 484                            | 952                            | 1020                            |
|                                                                                                                                                                   |                              | 5.14                            | 10.2                            | 46.7                            | 100                            | 266                            | 477                            | *1070                          | *1200                           |
| 03-Apr-2008                                                                                                                                                       | 7                            | 5.18                            | 10                              | 51.2                            | 98.3                           | 250                            | 500                            | 948                            | 1030                            |
|                                                                                                                                                                   |                              | 4.83                            | *13.1                           | 51.3                            | 89.9                           | 245                            | 467                            | 976                            | 986                             |
| 04-Apr-2008                                                                                                                                                       | 8                            | 4.73                            | 10.7                            | 49.1                            | 97.6                           | 242                            | 459                            | 966                            | 973                             |
|                                                                                                                                                                   |                              | 4.91                            | 10.8                            | 51.5                            | 90                             | 259                            | 475                            | 944                            | 1060                            |
| 04-Apr-2008                                                                                                                                                       | 9                            | 4.37                            | 9.46                            | 47.5                            | 92.6                           | 249                            | 462                            | 874                            | 995                             |
|                                                                                                                                                                   |                              | 5.72                            | 10.2                            | 52.8                            | 104                            | 257                            | 484                            | 949                            | 1110                            |
|                                                                                                                                                                   |                              |                                 |                                 |                                 |                                |                                |                                |                                |                                 |
| Mean                                                                                                                                                              |                              | 4.97                            | 10.2                            | 49.6                            | 97.3                           | 251                            | 489                            | 932                            | 1010                            |
| SD                                                                                                                                                                |                              | 0.298                           | 0.505                           | 2.31                            | 6.11                           | 10.7                           | 27.1                           | 69.8                           | 58.3                            |
| %CV                                                                                                                                                               |                              | 6                               | 5                               | 4.7                             | 6.3                            | 4.3                            | 5.5                            | 7.5                            | 5.8                             |
| %Bias                                                                                                                                                             |                              | -0.6                            | 2                               | -0.8                            | -2.7                           | 0.4                            | -2.2                           | 3.6                            | 1                               |
| n                                                                                                                                                                 |                              | 18                              | 17                              | 18                              | 18                             | 18                             | 18                             | 16                             | 17                              |

\*Accuracy more than 15%; excluded from regression analysis.

Fexinidazole  
 Toxicokinetic Report for the study No. 0504-2007

| <b>Table 2A2. Analytical Performance: Back-Calculated Concentrations (ng/mL) of Sulfone Calibration Standard in Rat Plasma for Study Protocol 0504-2007.</b> |                              |                                 |                                 |                                |                                |                                 |                                 |                                  |                                  |
|--------------------------------------------------------------------------------------------------------------------------------------------------------------|------------------------------|---------------------------------|---------------------------------|--------------------------------|--------------------------------|---------------------------------|---------------------------------|----------------------------------|----------------------------------|
| <b>Assay Date</b>                                                                                                                                            | <b>Analytical Run Number</b> | <b>STD.1<br/>25.0<br/>ng/mL</b> | <b>STD.2<br/>50.0<br/>ng/mL</b> | <b>STD.3<br/>250<br/>ng/mL</b> | <b>STD.4<br/>500<br/>ng/mL</b> | <b>STD.5<br/>2500<br/>ng/mL</b> | <b>STD.6<br/>5000<br/>ng/mL</b> | <b>STD.7<br/>22500<br/>ng/mL</b> | <b>STD.8<br/>25000<br/>ng/mL</b> |
| 31-Mar-2008                                                                                                                                                  | 1                            | 24.4                            | 48.6                            | 256                            | 549                            | 2450                            | 5080                            | *16900                           | 21400                            |
|                                                                                                                                                              |                              | 25.1                            | 51.2                            | 280                            | *592                           | 2760                            | 4690                            | 21000                            | 23600                            |
| 01-Apr-2008                                                                                                                                                  | 2                            | 24.1                            | 44.9                            | 227                            | 458                            | 2480                            | 4920                            | *16100                           | *19400                           |
|                                                                                                                                                              |                              | 27.1                            | *61.1                           | 263                            | 571                            | 2810                            | *6200                           | 23000                            | 22700                            |
| 01-Apr-2008                                                                                                                                                  | 3                            | 25.8                            | 48.3                            | 237                            | 514                            | 2460                            | 5240                            | *17700                           | *18500                           |
|                                                                                                                                                              |                              | 23.6                            | 53.4                            | 278                            | 484                            | 2590                            | *5910                           | 21100                            | 23200                            |
| 02-Apr-2008                                                                                                                                                  | 4                            | 26.5                            | 49.2                            | 234                            | 492                            | 2640                            | 4950                            | *18000                           | *20000                           |
|                                                                                                                                                              |                              | 24.2                            | 49                              | 248                            | 485                            | 2660                            | 5670                            | *16700                           | 22200                            |
| 02-Apr-2008                                                                                                                                                  | 5                            | 20.5                            | 50                              | 252                            | 457                            | 2430                            | 4770                            | *15200                           | *19900                           |
|                                                                                                                                                              |                              | 29.2                            | *95.5                           | 278                            | 524                            | 2680                            | 5510                            | 20600                            | 22800                            |
| 03-Apr-2008                                                                                                                                                  | 6                            | 22.3                            | 47                              | 232                            | 532                            | 2610                            | 4790                            | *17600                           | *20600                           |
|                                                                                                                                                              |                              | 28.5                            | 50.3                            | 236                            | 533                            | 2640                            | 4920                            | 21800                            | 25200                            |
| 03-Apr-2008                                                                                                                                                  | 7                            | 26.6                            | 50.1                            | 274                            | 514                            | 2650                            | 5270                            | 21100                            | 21600                            |
|                                                                                                                                                              |                              | 23.1                            | *130                            | *324                           | 508                            | 2750                            | 5180                            | 21300                            | 21900                            |
| 04-Apr-2008                                                                                                                                                  | 8                            | 22.7                            | 52.8                            | 257                            | 516                            | 2450                            | 4710                            | 19900                            | 23700                            |
|                                                                                                                                                              |                              | 24.7                            | 56                              | 276                            | 503                            | 2740                            | 5310                            | 19200                            | 24700                            |
| 04-Apr-2008                                                                                                                                                  | 9                            | 23.7                            | 48.5                            | 253                            | 485                            | 2600                            | 4750                            | *17400                           | *20400                           |
|                                                                                                                                                              |                              | 26.6                            | 49.4                            | 267                            | 539                            | 2630                            | 4880                            | *18400                           | 22100                            |
|                                                                                                                                                              |                              |                                 |                                 |                                |                                |                                 |                                 |                                  |                                  |
| Mean                                                                                                                                                         |                              | 24.9                            | 49.9                            | 256                            | 510                            | 2610                            | 5040                            | 21000                            | 22900                            |
| SD                                                                                                                                                           |                              | 2.23                            | 2.69                            | 18                             | 30.8                           | 117                             | 296                             | 1080                             | 1200                             |
| %CV                                                                                                                                                          |                              | 9                               | 5.4                             | 7                              | 6                              | 4.5                             | 5.9                             | 5.1                              | 5.2                              |
| %Bias                                                                                                                                                        |                              | -0.4                            | -0.2                            | 2.4                            | 2                              | 4.4                             | 0.8                             | -6.7                             | -8.4                             |
| n                                                                                                                                                            |                              | 18                              | 15                              | 17                             | 17                             | 18                              | 16                              | 9                                | 12                               |

\*Accuracy more than 15%; excluded from regression analysis.

Fexinidazole  
Toxicokinetic Report for the study No. 0504-2007

| <b>Table 3A2. Analytical Performance: Back-Calculated Concentrations (ng/mL) of Sulfoxide Calibration Standard in Rat Plasma for Study Protocol 0504-2007.</b> |                              |                                 |                                 |                                |                                |                                 |                                 |                                  |                                  |
|----------------------------------------------------------------------------------------------------------------------------------------------------------------|------------------------------|---------------------------------|---------------------------------|--------------------------------|--------------------------------|---------------------------------|---------------------------------|----------------------------------|----------------------------------|
| <b>Assay Date</b>                                                                                                                                              | <b>Analytical Run Number</b> | <b>STD.1<br/>25.0<br/>ng/mL</b> | <b>STD.2<br/>50.0<br/>ng/mL</b> | <b>STD.3<br/>250<br/>ng/mL</b> | <b>STD.4<br/>500<br/>ng/mL</b> | <b>STD.5<br/>2500<br/>ng/mL</b> | <b>STD.6<br/>5000<br/>ng/mL</b> | <b>STD.7<br/>22500<br/>ng/mL</b> | <b>STD.8<br/>25000<br/>ng/mL</b> |
| 31-Mar-2008                                                                                                                                                    | 1                            | 24.1                            | 47                              | 248                            | 554                            | 2450                            | 5010                            | 19700                            | 22400                            |
|                                                                                                                                                                |                              | 26.9                            | 47.6                            | 272                            | *600                           | 2820                            | 4720                            | 24100                            | 24600                            |
| 01-Apr-2008                                                                                                                                                    | 2                            | 23.5                            | *39.4                           | 216                            | 448                            | 2460                            | 4880                            | *18500                           | *20100                           |
|                                                                                                                                                                |                              | 25.7                            | 54.8                            | 243                            | 549                            | 2680                            | *5870                           | 25700                            | 23200                            |
| 01-Apr-2008                                                                                                                                                    | 3                            | 26.3                            | 47.8                            | 233                            | 499                            | 2500                            | 5270                            | 20600                            | *19800                           |
|                                                                                                                                                                |                              | 25                              | 46.6                            | 272                            | 479                            | 2580                            | *6040                           | 24500                            | 24500                            |
| 02-Apr-2008                                                                                                                                                    | 4                            | 28                              | 47.4                            | 238                            | 511                            | 2830                            | 5140                            | 21800                            | 22200                            |
|                                                                                                                                                                |                              | 22.5                            | 50.4                            | 258                            | 500                            | 2810                            | *6050                           | 20200                            | 24400                            |
| 02-Apr-2008                                                                                                                                                    | 5                            | 21.8                            | 45.4                            | 246                            | 455                            | 2490                            | 4730                            | *17700                           | *20900                           |
|                                                                                                                                                                |                              | 29.3                            | *94.6                           | 262                            | 510                            | 2660                            | 5450                            | 23500                            | 23500                            |
| 03-Apr-2008                                                                                                                                                    | 6                            | 22.8                            | *41.4                           | 223                            | 514                            | 2700                            | 4830                            | 20700                            | 21900                            |
|                                                                                                                                                                |                              | 28.4                            | 46.5                            | 229                            | 526                            | 2730                            | 4960                            | 25600                            | 26800                            |
| 03-Apr-2008                                                                                                                                                    | 7                            | 27.6                            | 46.8                            | 260                            | 493                            | 2620                            | 5100                            | 23600                            | 22100                            |
|                                                                                                                                                                |                              | 23.1                            | *122                            | *306                           | 488                            | 2640                            | 5030                            | 23900                            | 22600                            |
| 04-Apr-2008                                                                                                                                                    | 8                            | 23.4                            | 44.6                            | 241                            | 499                            | 2380                            | 4610                            | 22700                            | 24900                            |
|                                                                                                                                                                |                              | 27.3                            | 52.4                            | 268                            | 497                            | 2710                            | 5200                            | 22100                            | 25500                            |
| 04-Apr-2008                                                                                                                                                    | 9                            | 23.7                            | 44.9                            | 254                            | 486                            | 2690                            | 4930                            | 20800                            | 22300                            |
|                                                                                                                                                                |                              | 27.5                            | 49.2                            | 266                            | 548                            | 2710                            | 5060                            | 22100                            | 24300                            |
|                                                                                                                                                                |                              |                                 |                                 |                                |                                |                                 |                                 |                                  |                                  |
| Mean                                                                                                                                                           |                              | 25.4                            | 48                              | 249                            | 503                            | 2640                            | 4990                            | 22600                            | 23700                            |
| SD                                                                                                                                                             |                              | 2.34                            | 2.88                            | 17.2                           | 29.7                           | 134                             | 224                             | 1900                             | 1460                             |
| %CV                                                                                                                                                            |                              | 9.2                             | 6                               | 6.9                            | 5.9                            | 5.1                             | 4.5                             | 8.4                              | 6.2                              |
| %Bias                                                                                                                                                          |                              | 1.6                             | -4                              | -0.4                           | 0.6                            | 5.6                             | -0.2                            | 0.4                              | -5.2                             |
| n                                                                                                                                                              |                              | 18                              | 14                              | 17                             | 17                             | 18                              | 15                              | 16                               | 15                               |

\*Accuracy more than 15%; excluded from regression analysis.

Fexinidazole  
Toxicokinetic Report for the study No. 0504-2007

---

### Calibration curves parameters

| <b>Table 4A2. Calibration Curve Parameters for Fexinidazole Calibration Standards in Rat Plasma for Study Protocol 0504-2007.</b> |                     |              |                  |                      |                   |                   |                               |
|-----------------------------------------------------------------------------------------------------------------------------------|---------------------|--------------|------------------|----------------------|-------------------|-------------------|-------------------------------|
| <b>Run Date</b>                                                                                                                   | <b>Curve Number</b> | <b>Slope</b> | <b>Intercept</b> | <b>R<sup>2</sup></b> | <b>LLOQ ng/mL</b> | <b>ULOQ ng/mL</b> | <b>Regression Footnote(s)</b> |
| 31-Mar-2008                                                                                                                       | 1                   | 0.00460      | 0.00102          | 0.9939               | 5                 | 1000              | 1                             |
| 01-Apr-2008                                                                                                                       | 2                   | 0.00482      | 0.00105          | 0.9961               | 5                 | 1000              | 1                             |
| 01-Apr-2008                                                                                                                       | 3                   | 0.00503      | -0.00059         | 0.993                | 5                 | 1000              | 1                             |
| 02-Apr-2008                                                                                                                       | 4                   | 0.00508      | 0.00008          | 0.9966               | 5                 | 1000              | 1                             |
| 02-Apr-2008                                                                                                                       | 5                   | 0.00480      | 0.00090          | 0.9941               | 5                 | 1000              | 1                             |
| 03-Apr-2008                                                                                                                       | 6                   | 0.00472      | 0.00209          | 0.997                | 5                 | 1000              | 1                             |
| 03-Apr-2008                                                                                                                       | 7                   | 0.00500      | 0.00180          | 0.9974               | 5                 | 1000              | 1                             |
| 04-Apr-2008                                                                                                                       | 8                   | 0.00556      | 0.00035          | 0.9956               | 5                 | 1000              | 1                             |
| 04-Apr-2008                                                                                                                       | 9                   | 0.00439      | 0.00155          | 0.9934               | 5                 | 1000              | 1                             |
|                                                                                                                                   |                     |              |                  |                      |                   |                   |                               |
| Mean                                                                                                                              |                     | 0.00489      | 0.00092          | 0.9952               |                   |                   |                               |
| SD                                                                                                                                |                     | 0.00033      | 0.00086          | 0.0017               |                   |                   |                               |
| %CV                                                                                                                               |                     | 6.8          | 93.6             | 0.2                  |                   |                   |                               |
| n                                                                                                                                 |                     | 9            | 9                | 9                    |                   |                   |                               |
| Regression Footnote(s):                                                                                                           |                     |              |                  |                      |                   |                   |                               |
| 1) Resp. = Slope * Conc. + Intercept                                                                                              |                     |              |                  |                      |                   |                   |                               |

Fexinidazole  
Toxicokinetic Report for the study No. 0504-2007

---

| <b>Table 5A2. Calibration Curve Parameters for Sulfone Calibration Standards in Rat Plasma for Study Protocol 0504-2007.</b> |                     |              |                  |                      |                   |                   |                               |
|------------------------------------------------------------------------------------------------------------------------------|---------------------|--------------|------------------|----------------------|-------------------|-------------------|-------------------------------|
| <b>Run Date</b>                                                                                                              | <b>Curve Number</b> | <b>Slope</b> | <b>Intercept</b> | <b>R<sup>2</sup></b> | <b>LLOQ ng/mL</b> | <b>ULOQ ng/mL</b> | <b>Regression Footnote(s)</b> |
| 31-Mar-2008                                                                                                                  | 1                   | 0.00423      | 0.00869          | 0.9929               | 25                | 25000             | 1                             |
| 01-Apr-2008                                                                                                                  | 2                   | 0.00457      | 0.00539          | 0.9905               | 25                | 25000             | 1                             |
| 01-Apr-2008                                                                                                                  | 3                   | 0.00529      | 0.01259          | 0.9954               | 25                | 25000             | 1                             |
| 02-Apr-2008                                                                                                                  | 4                   | 0.00595      | 0.00952          | 0.9945               | 25                | 25000             | 1                             |
| 02-Apr-2008                                                                                                                  | 5                   | 0.00520      | 0.00990          | 0.9878               | 25                | 25000             | 1                             |
| 03-Apr-2008                                                                                                                  | 6                   | 0.00552      | -0.00197         | 0.9939               | 25                | 25000             | 1                             |
| 03-Apr-2008                                                                                                                  | 7                   | 0.00554      | 0.02695          | 0.9927               | 25                | 25000             | 1                             |
| 04-Apr-2008                                                                                                                  | 8                   | 0.00751      | 0.00694          | 0.992                | 25                | 25000             | 1                             |
| 04-Apr-2008                                                                                                                  | 9                   | 0.00449      | 0.00089          | 0.9953               | 25                | 25000             | 1                             |
|                                                                                                                              |                     |              |                  |                      |                   |                   |                               |
| Mean                                                                                                                         |                     | 0.00537      | 0.00877          | 0.9928               |                   |                   |                               |
| SD                                                                                                                           |                     | 0.00098      | 0.00821          | 0.0025               |                   |                   |                               |
| %CV                                                                                                                          |                     | 18.3         | 93.6             | 0.3                  |                   |                   |                               |
| n                                                                                                                            |                     | 9            | 9                | 9                    |                   |                   |                               |
| Regression Footnote(s):                                                                                                      |                     |              |                  |                      |                   |                   |                               |
| 1) Resp. = Slope * Conc. + Intercept                                                                                         |                     |              |                  |                      |                   |                   |                               |

Fexinidazole  
Toxicokinetic Report for the study No. 0504-2007

---

| <b>Table 6A2. Calibration Curve Parameters for Sulfoxide Calibration Standards in Rat Plasma for Study Protocol 0504-2007.</b> |                     |              |                  |                      |                   |                   |                               |
|--------------------------------------------------------------------------------------------------------------------------------|---------------------|--------------|------------------|----------------------|-------------------|-------------------|-------------------------------|
| <b>Run Date</b>                                                                                                                | <b>Curve Number</b> | <b>Slope</b> | <b>Intercept</b> | <b>R<sup>2</sup></b> | <b>LLOQ ng/mL</b> | <b>ULOQ ng/mL</b> | <b>Regression Footnote(s)</b> |
| 31-Mar-2008                                                                                                                    | 1                   | 0.00432      | 0.01739          | 0.9923               | 25                | 25000             | 1                             |
| 01-Apr-2008                                                                                                                    | 2                   | 0.00471      | 0.02234          | 0.9902               | 25                | 25000             | 1                             |
| 01-Apr-2008                                                                                                                    | 3                   | 0.00524      | 0.02069          | 0.9955               | 25                | 25000             | 1                             |
| 02-Apr-2008                                                                                                                    | 4                   | 0.00568      | 0.02901          | 0.9918               | 25                | 25000             | 1                             |
| 02-Apr-2008                                                                                                                    | 5                   | 0.00519      | 0.02312          | 0.9911               | 25                | 25000             | 1                             |
| 03-Apr-2008                                                                                                                    | 6                   | 0.00540      | 0.01665          | 0.99                 | 25                | 25000             | 1                             |
| 03-Apr-2008                                                                                                                    | 7                   | 0.00568      | 0.02696          | 0.9946               | 25                | 25000             | 1                             |
| 04-Apr-2008                                                                                                                    | 8                   | 0.00764      | 0.01832          | 0.9956               | 25                | 25000             | 1                             |
| 04-Apr-2008                                                                                                                    | 9                   | 0.00431      | 0.01868          | 0.994                | 25                | 25000             | 1                             |
|                                                                                                                                |                     |              |                  |                      |                   |                   |                               |
| Mean                                                                                                                           |                     | 0.00535      | 0.02146          | 0.9928               |                   |                   |                               |
| SD                                                                                                                             |                     | 0.00100      | 0.00431          | 0.0022               |                   |                   |                               |
| %CV                                                                                                                            |                     | 18.8         | 20.1             | 0.2                  |                   |                   |                               |
| n                                                                                                                              |                     | 9            | 9                | 9                    |                   |                   |                               |
| Regression Footnote(s):                                                                                                        |                     |              |                  |                      |                   |                   |                               |
| 1) Resp. = Slope * Conc. + Intercept                                                                                           |                     |              |                  |                      |                   |                   |                               |

Fexinidazole  
 Toxicokinetic Report for the study No. 0504-2007

**Individual and summary QC data**

| <b>Table 7A2. Analytical Performance of Fexinidazole Quality Control Samples in Rat Plasma for Study Protocol 0504-2007.</b> |                     |                               |                               |                              |                                         |                                          |
|------------------------------------------------------------------------------------------------------------------------------|---------------------|-------------------------------|-------------------------------|------------------------------|-----------------------------------------|------------------------------------------|
| <b>Run Date</b>                                                                                                              | <b>Curve Number</b> | <b>QC1<br/>15.0<br/>ng/mL</b> | <b>QC2<br/>75.0<br/>ng/mL</b> | <b>QC3<br/>800<br/>ng/mL</b> | <b>QC3<br/>Dilution=2<br/>800 ng/mL</b> | <b>QC4<br/>Dilution=5<br/>2000 ng/mL</b> |
| 31-Mar-2008                                                                                                                  | 1                   | 16.4                          | 83.9                          | 863                          |                                         |                                          |
|                                                                                                                              |                     | 16.9                          | ~86.8                         | 903                          |                                         |                                          |
| 01-Apr-2008                                                                                                                  | 2                   | 16.8                          | 82.2                          | 828                          |                                         |                                          |
|                                                                                                                              |                     | ~18.9                         | ~90.8                         | 903                          |                                         |                                          |
| 01-Apr-2008                                                                                                                  | 3                   | 14.7                          | 80.9                          | 889                          |                                         |                                          |
|                                                                                                                              |                     | 16.5                          | ~86.4                         | 846                          |                                         |                                          |
| 02-Apr-2008                                                                                                                  | 4                   | *36.4                         | 79.7                          | 823                          |                                         |                                          |
|                                                                                                                              |                     | 16.7                          | 84.5                          | 847                          |                                         |                                          |
| 02-Apr-2008                                                                                                                  | 5                   | 16.7                          | 85.7                          | 803                          | 814                                     |                                          |
|                                                                                                                              |                     | 17                            | ~88.6                         | 818                          | 829                                     |                                          |
|                                                                                                                              |                     |                               |                               |                              | 881                                     |                                          |
| 03-Apr-2008                                                                                                                  | 6                   | 15.9                          | 82.7                          | 905                          |                                         | 2140                                     |
|                                                                                                                              |                     | 17.5                          | 76.3                          | 890                          |                                         | 2180                                     |
|                                                                                                                              |                     |                               |                               |                              |                                         | 2240                                     |
| 03-Apr-2008                                                                                                                  | 7                   | 16.1                          | 77.2                          | 824                          |                                         | 2010                                     |
|                                                                                                                              |                     | 16.8                          | 78.4                          | 847                          |                                         | 2000                                     |
|                                                                                                                              |                     |                               |                               |                              |                                         | 1860                                     |
| 04-Apr-2008                                                                                                                  | 8                   | 16.6                          | 81.1                          | 890                          |                                         | 1970                                     |
|                                                                                                                              |                     | ~18.6                         | ~88.5                         | 848                          |                                         | 2240                                     |
|                                                                                                                              |                     |                               |                               |                              |                                         | 2150                                     |
| 04-Apr-2008                                                                                                                  | 9                   | 14.5                          | 70.5                          | 754                          |                                         | 2170                                     |
|                                                                                                                              |                     | 16.4                          | 81                            | 840                          |                                         | 2100                                     |
|                                                                                                                              |                     |                               |                               |                              |                                         | 2270                                     |
|                                                                                                                              |                     |                               |                               |                              |                                         |                                          |
| Mean                                                                                                                         |                     | 16.6                          | 82.5                          | 851                          | 841                                     | 2110                                     |
| SD                                                                                                                           |                     | 1.1                           | 5.05                          | 40.6                         | 35.2                                    | 126                                      |
| %CV                                                                                                                          |                     | 6.6                           | 6.1                           | 4.8                          | 4.2                                     | 6                                        |
| %Bias                                                                                                                        |                     | 10.7                          | 10                            | 6.4                          | 5.1                                     | 5.5                                      |
| n                                                                                                                            |                     | 17                            | 18                            | 18                           | 3                                       | 12                                       |
| *Reason Deactivated: Error during sample preparation<br>~ > 15% Theoretical                                                  |                     |                               |                               |                              |                                         |                                          |



Fexinidazole  
Toxicokinetic Report for the study No. 0504-2007

| <b>Table 8A2. Analytical Performance of Sulfone Quality Control Samples in Rat Plasma for Study Protocol 0504-2007.</b> |                     |                               |                              |                                |                                           |                                           |
|-------------------------------------------------------------------------------------------------------------------------|---------------------|-------------------------------|------------------------------|--------------------------------|-------------------------------------------|-------------------------------------------|
| <b>Run Date</b>                                                                                                         | <b>Curve Number</b> | <b>QC1<br/>75.0<br/>ng/mL</b> | <b>QC2<br/>750<br/>ng/mL</b> | <b>QC3<br/>20000<br/>ng/mL</b> | <b>QC3<br/>Dilution=2<br/>20000 ng/mL</b> | <b>QC4<br/>Dilution=5<br/>50000 ng/mL</b> |
| 31-Mar-2008                                                                                                             | 1                   | 81.4                          | 856                          | 20000                          |                                           |                                           |
|                                                                                                                         |                     | 79.1                          | ~875                         | 20900                          |                                           |                                           |
| 01-Apr-2008                                                                                                             | 2                   | 76.6                          | 811                          | 18300                          |                                           |                                           |
|                                                                                                                         |                     | 86.1                          | ~999                         | ~23800                         |                                           |                                           |
| 01-Apr-2008                                                                                                             | 3                   | 70.3                          | 842                          | 20600                          |                                           |                                           |
|                                                                                                                         |                     | 86.4                          | ~886                         | 20500                          |                                           |                                           |
| 02-Apr-2008                                                                                                             | 4                   | *775                          | 817                          | 19900                          |                                           |                                           |
|                                                                                                                         |                     | 79.1                          | 837                          | 20100                          |                                           |                                           |
| 02-Apr-2008                                                                                                             | 5                   | 79.2                          | 852                          | 21200                          | 20700                                     |                                           |
|                                                                                                                         |                     | 84.7                          | ~934                         | 18900                          | 21900                                     |                                           |
|                                                                                                                         |                     |                               |                              |                                | 22800                                     |                                           |
| 03-Apr-2008                                                                                                             | 6                   | 74.1                          | 822                          | 19300                          |                                           | 54700                                     |
|                                                                                                                         |                     | 84.9                          | 724                          | 19900                          |                                           | 53900                                     |
|                                                                                                                         |                     |                               |                              |                                |                                           | 55500                                     |
| 03-Apr-2008                                                                                                             | 7                   | 73.1                          | 791                          | 22600                          |                                           | 53400                                     |
|                                                                                                                         |                     | 85.7                          | 827                          | 21700                          |                                           | 52700                                     |
|                                                                                                                         |                     |                               |                              |                                |                                           | 48800                                     |
| 04-Apr-2008                                                                                                             | 8                   | 81.9                          | 815                          | 21400                          |                                           | 53600                                     |
|                                                                                                                         |                     | ~91.2                         | ~889                         | 21200                          |                                           | 55700                                     |
|                                                                                                                         |                     |                               |                              |                                |                                           | 54900                                     |
| 04-Apr-2008                                                                                                             | 9                   | 79.4                          | 703                          | 17100                          |                                           | 53500                                     |
|                                                                                                                         |                     | 82.3                          | 794                          | 19000                          |                                           | 53000                                     |
|                                                                                                                         |                     |                               |                              |                                |                                           | 56500                                     |
|                                                                                                                         |                     |                               |                              |                                |                                           |                                           |
| Mean                                                                                                                    |                     | 80.9                          | 837                          | 20400                          | 21800                                     | 53900                                     |
| SD                                                                                                                      |                     | 5.42                          | 68.3                         | 1570                           | 1050                                      | 1980                                      |
| %CV                                                                                                                     |                     | 6.7                           | 8.2                          | 7.7                            | 4.8                                       | 3.7                                       |
| %Bias                                                                                                                   |                     | 7.9                           | 11.6                         | 2                              | 9                                         | 7.8                                       |
| n                                                                                                                       |                     | 17                            | 18                           | 18                             | 3                                         | 12                                        |
| *Reason Deactivated: Error during sample preparation<br>~ > 15% Theoretical                                             |                     |                               |                              |                                |                                           |                                           |

Fexinidazole  
 Toxicokinetic Report for the study No. 0504-2007

| <b>Table 9A2. Analytical Performance of Sulfoxide Quality Control Samples in Rat Plasma for Study Protocol 0504-2007.</b> |                     |                               |                              |                                |                                               |                                           |
|---------------------------------------------------------------------------------------------------------------------------|---------------------|-------------------------------|------------------------------|--------------------------------|-----------------------------------------------|-------------------------------------------|
| <b>Run Date</b>                                                                                                           | <b>Curve Number</b> | <b>QC1<br/>75.0<br/>ng/mL</b> | <b>QC2<br/>750<br/>ng/mL</b> | <b>QC3<br/>20000<br/>ng/mL</b> | <b>QC3<br/>Dilution=2<br/>20000<br/>ng/mL</b> | <b>QC4<br/>Dilution=5<br/>50000 ng/mL</b> |
| 31-Mar-2008                                                                                                               | 1                   | 81.9                          | 826                          | 18900                          |                                               |                                           |
|                                                                                                                           |                     | 80.4                          | 834                          | 20000                          |                                               |                                           |
| 01-Apr-2008                                                                                                               | 2                   | 75.8                          | 786                          | 17500                          |                                               |                                           |
|                                                                                                                           |                     | 86.1                          | ~955                         | 22100                          |                                               |                                           |
| 01-Apr-2008                                                                                                               | 3                   | 72.3                          | 826                          | 19900                          |                                               |                                           |
|                                                                                                                           |                     | 89.4                          | ~881                         | 19800                          |                                               |                                           |
| 02-Apr-2008                                                                                                               | 4                   | *972                          | 821                          | 20200                          |                                               |                                           |
|                                                                                                                           |                     | 78.2                          | 852                          | 20200                          |                                               |                                           |
| 02-Apr-2008                                                                                                               | 5                   | 79.2                          | 824                          | 20100                          | 19800                                         |                                           |
|                                                                                                                           |                     | 86                            | ~898                         | 18300                          | 20800                                         |                                           |
|                                                                                                                           |                     |                               |                              |                                | 22000                                         |                                           |
| 03-Apr-2008                                                                                                               | 6                   | 74.2                          | 812                          | 19000                          |                                               | 53400                                     |
|                                                                                                                           |                     | 85.6                          | 724                          | 19500                          |                                               | 51900                                     |
|                                                                                                                           |                     |                               |                              |                                |                                               | 54700                                     |
| 03-Apr-2008                                                                                                               | 7                   | 72.9                          | 756                          | 20800                          |                                               | 49300                                     |
|                                                                                                                           |                     | 85.1                          | 799                          | 20400                          |                                               | 48300                                     |
|                                                                                                                           |                     |                               |                              |                                |                                               | 44700                                     |
| 04-Apr-2008                                                                                                               | 8                   | 83.8                          | 788                          | 19900                          |                                               | 50700                                     |
|                                                                                                                           |                     | ~90.4                         | ~868                         | 20100                          |                                               | 51800                                     |
|                                                                                                                           |                     |                               |                              |                                |                                               | 51100                                     |
| 04-Apr-2008                                                                                                               | 9                   | 80.5                          | 713                          | 17000                          |                                               | 52900                                     |
|                                                                                                                           |                     | 84.5                          | 809                          | 18800                          |                                               | 51500                                     |
|                                                                                                                           |                     |                               |                              |                                |                                               | 55900                                     |
|                                                                                                                           |                     |                               |                              |                                |                                               |                                           |
| Mean                                                                                                                      |                     | 81.5                          | 821                          | 19600                          | 20900                                         | 51400                                     |
| SD                                                                                                                        |                     | 5.53                          | 59                           | 1200                           | 1100                                          | 2970                                      |
| %CV                                                                                                                       |                     | 6.8                           | 7.2                          | 6.1                            | 5.3                                           | 5.8                                       |
| %Bias                                                                                                                     |                     | 8.7                           | 9.5                          | -2                             | 4.5                                           | 2.8                                       |
| n                                                                                                                         |                     | 17                            | 18                           | 18                             | 3                                             | 12                                        |
| *Reason Deactivated: Error during sample preparation<br>~ > 15% Theoretical                                               |                     |                               |                              |                                |                                               |                                           |



Fexinidazole  
Toxicokinetic Report for the study No. 0504-2007

Universität Zürich-Irchel  
Winterthurerstrasse 190  
CH-8057 Zürich  
Tel. + 41 (0)44 635 42 80  
Fax + 41 (0)44 635 68 12

Analytisches Laboratorium  
Organisch-chemisches Institut  
Tel. + 41 (0)44 635 42 91  
Fax + 41 (0)44 635 68 49  
info@lpf.unizh.ch

## Certificate of Analysis

### Produktname

Chemical Name: 1-Methyl-2-(4-methylsulfinyl-phenoxy-methyl)-5-nitroimidazol  
(Fexinidazol-sulfoxid)

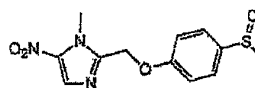

Molecular formula:  $C_{12}H_{13}N_3O_4S$   
Molecular weight: 295.31  
Project-Code: PU 83 IIII  
Manufacturer: Gruppe Prof. Dr. J. S. Siegel, PU  
University of Zurich, Switzerland  
Manufacturing Date: 11.2006  
Analytical Analysis Order: 1106-I-0170  
Test date: 06.11.06  
Retest date: n/a  
History of CoA: 06.11.06

| Tests                                        |                      | Results              |
|----------------------------------------------|----------------------|----------------------|
| 1. Appearance                                | [visual]             | colourless powder    |
| 2. <sup>1</sup> H-NMR / MS                   | [CDCl <sub>3</sub> ] | confirms structure   |
| 3. FT-IR (ATR)                               | [cm <sup>-1</sup> ]  | for information only |
| 4. HPLC Purity (LPF123G3.M)                  | [Area-%]             | 99.34                |
| 4.1 Main Impurity                            |                      | 0.59                 |
| 4.2 Sum of Impurities                        |                      | 0.62                 |
| 5. Water (KFT)                               | [%]                  | 0.04                 |
| 6. Chlorides (T, 0.005 N AgNO <sub>3</sub> ) | [%]                  | na                   |
| 7. Residual Solvents (GC-Headspace)          | [%]                  |                      |
| 7.1 Ethanol                                  |                      | 0.02                 |
| 7.2 Ether                                    |                      | not detected         |

All results described above (except NMR) were obtained on equipment qualified according to GMP procedures in use at the Analytical Laboratory of the LPF (AnLab-OC).

For investigational use according to ICH Q7A, Chapter 19

Issued by: Peter Uebelhart  
[uebelhart@oci.unizh.ch](mailto:uebelhart@oci.unizh.ch)  
Tel: +41 (0)44 635 42 74

Date: 07.11.2006

Fexinidazole  
Toxicokinetic Report for the study No. 0504-2007

Universität Zürich-Irchel  
Winterthurerstrasse 190  
CH-8057 Zürich  
Tel. + 41 (0)44 635 42 80  
Fax + 41 (0)44 635 68 12

Analytisches Laboratorium  
Organisch-chemisches Institut  
Tel. + 41 (0)44 635 42 91  
Fax + 41 (0)44 635 68 49  
info@ipf.unizh.ch

## Certificate of Analysis

### Produktname

Chemical Name: 1-Methyl-2-(4-methylsulfonyl-phenoxy)methyl)-5-nitroimidazol  
(Fexinidazol-sulfon)

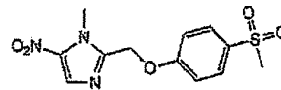

Molecular formula: C<sub>12</sub>H<sub>13</sub>N<sub>3</sub>O<sub>5</sub>S  
Molecular weight: 311.31  
Project-Code: PU 86  
Manufacturer: Gruppe Prof. Dr. J. S. Siegel, PU  
University of Zurich, Switzerland  
Manufacturing Date: 10.2006  
Analytical Analysis Order: 1106-I-0171  
Test date: 07.11.06  
Retest date: n/a  
History of CoA: 07.11.06

| Tests                                        |                      | Results                |
|----------------------------------------------|----------------------|------------------------|
| 1. Appearance                                | [visual]             | slightly yellow powder |
| 2. <sup>1</sup> H-NMR / MS                   | [CDCl <sub>3</sub> ] | confirms structure     |
| 3. FT-IR (ATR)                               | [cm <sup>-1</sup> ]  | for information only   |
| 4. HPLC Purity (LPF123G3.M)                  | [Area-%]             | 99.92                  |
| 4.1 Main Impurity                            |                      | 0.05                   |
| 4.2 Sum of Impurities                        |                      | 0.07                   |
| 5. Water (KFT)                               | [%]                  | 0.05                   |
| 6. Chlorides (T, 0.005 N AgNO <sub>3</sub> ) | [%]                  | na                     |
| 7. Residual Solvents (GC-Headspace)          | [%]                  |                        |
| 7.1 2-Propanol                               |                      | 0.07                   |
| 7.2 EtOAc                                    |                      | 0.02                   |

All results described above (except NMR) were obtained on equipment qualified according to GMP procedures in use at the Analytical Laboratory of the LPF (AnLab-OC).

For investigational use according to ICH Q7A, Chapter 19

Issued by: Peter Uebelhart  
ubehart@ocf.unizh.ch  
Tel: +41 (0)44 635 42 74

Date: 07.11.2006

## ***Appendix 12 Pharmacy Documentation***

## Pharmacy Certification

**STUDY NUMBER** : **0504-2007**  
**TEST ITEM** : **Fexinidazole**  
**NOTEBOOK NUMBER(S)** : **19202/B**

### DOCUMENTATION ENCLOSED IN THE NOTEBOOK:

- A. Analysis certificate dated December 18, 2007 issued by Orgasynth Industries for Fexinidazole test item, raw material, Batch No. 3168-07-01/O
- B. Material safety data sheet issued by Orgasynth Industries for Fexinidazole
- C. Certificate of Analysis issued by Sigma-Aldrich for Tween® 80, raw material, Lot No. 1324202
- D. Certificate of Analysis issued by Sigma-Aldrich for Methylcellulose 400 cP, raw material, Lot No. 105K0196
- E. Certificate of Analysis issued by Sigma-Aldrich for Methylcellulose 400 cP, raw material, Lot No. 017K0087
- F. Label's photocopy of Acqua per preparazioni iniettabili (Bieffe Medital S.p.A.), raw material, Lot No. 07G0201
- G. Label's photocopy of Acqua per preparazioni iniettabili (Bieffe Medital S.p.A.), raw material, Lot No. 07K1503
- H. Request cards for Fexinidazole test item

### ANALYTICAL DOCUMENTATION:

Requests and Analytical Results issued by Accelera/ADMET/Preclinical Formulation and Accelera/DMPK&ART/Bioanalysis and Analytical Control

### MATERIALS USED FOR THE STUDY:

1. Fexinidazole test item, raw material, Batch No. 3168-07-01/O
2. Tween® 80, raw material, Lot No. 1324202
3. Methylcellulose 400 cP, raw material, Lot No. 105K0074
4. Methylcellulose 400 cP, raw material, Lot No. 017K0087
5. Acqua per preparazioni iniettabili, raw material, Lot No. 07G0201
6. Acqua per preparazioni iniettabili, raw material, Lot No. 07K1503

### PREPARATIONS:

Prepare suspension of Fexinidazole test item, raw material, Lot No. 3168-07-01/O in the vehicle (5% Tween® 80 in 0.5% Methylcellulose 400 cP solution) at the concentration of 5 mg/mL, 20 mg/mL and 80 mg/mL

**CONCENTRATION CHECKS:****Fexinidazole suspensions:**

|          |                                | <b>% of L.A.</b> | <b>Preparation date</b> |
|----------|--------------------------------|------------------|-------------------------|
| 80 mg/mL | Request No. 200800027 (Top)    | 100.23%          | February 04, 2008       |
| 80 mg/mL | Request No. 200800028 (Middle) | 97.84%           | February 04, 2008       |
| 80 mg/mL | Request No. 200800029 (Bottom) | 103.20%          | February 04, 2008       |
| 20 mg/mL | Request No. 200800030 (Top)    | 97.48%           | February 04, 2008       |
| 20 mg/mL | Request No. 200800031 (Middle) | 99.01%           | February 04, 2008       |
| 20 mg/mL | Request No. 200800032 (Bottom) | 95.21%           | February 04, 2008       |
| 5 mg/mL  | Request No. 200800033 (Top)    | 100.83%          | February 04, 2008       |
| 5 mg/mL  | Request No. 200800034 (Middle) | 101.22%          | February 04, 2008       |
| 5 mg/mL  | Request No. 200800035 (Bottom) | 104.67%          | February 04, 2008       |
| 80 mg/mL | Request No. 200800057 (Top)    | 98.45%           | February 29, 2008       |
| 80 mg/mL | Request No. 200800058 (Middle) | 96.50%           | February 29, 2008       |
| 80 mg/mL | Request No. 200800059 (Bottom) | 95.69%           | February 29, 2008       |
| 20 mg/mL | Request No. 200800060 (Top)    | 99.95%           | February 29, 2008       |
| 20 mg/mL | Request No. 200800061 (Middle) | 98.18%           | February 29, 2008       |
| 20 mg/mL | Request No. 200800062 (Bottom) | 97.27%           | February 29, 2008       |
| 5 mg/mL  | Request No. 200800063 (Top)    | 98.72%           | February 29, 2008       |
| 5 mg/mL  | Request No. 200800064 (Middle) | 107.40%          | February 29, 2008       |
| 5 mg/mL  | Request No. 200800065 (Bottom) | 94.66%           | February 29, 2008       |

**STABILITY:****Fexinidazole test item:**

Expire date October 2008 for Fexinidazole, test item, raw material, Lot No. 3168-07-01/O if stored at room temperature protected from light.

**Fexinidazole suspension:**

Stability data indicate that Fexinidazole suspensions in the vehicle (5% Tween® 80 in 0.5% Methylcellulose 400 cP solution) in the range 0.5-100 mg/mL are stable up to 7 days at room temperature and 14 days at +4°C (Nerviano MS 0293-2007-R)

Date: April 17, 2008



## ***Appendix 13 Clinical Pathology Methods***

HEMATOLOGY METHODS

| PARAMETERS                                     | CODE | UNIT                        | METHODS AND INSTRUMENTS                                                                            |
|------------------------------------------------|------|-----------------------------|----------------------------------------------------------------------------------------------------|
| Red blood cells                                | RBC  | $n \times 10^6/\mu\text{L}$ | Laser beam method. "ADVIA 120™ System" Bayer                                                       |
| Hemoglobin                                     | HGB  | g/dL                        | Colorimetric method as cyanmethemoglobin. "ADVIA 120™ System" Bayer                                |
| Hematocrit                                     | HCT  | %                           | Calculated: Wintrobe formulae "ADVIA 120™ System" Bayer                                            |
| Mean corpuscular hemoglobin concentration      | MCHC | g/dL                        | Calculated: Wintrobe formulae "ADVIA 120™ System" Bayer                                            |
| Mean corpuscular volume                        | MCV  | fL                          | Mean of RBC volume histogram x MCV calibration factor. "ADVIA 120™ System" Bayer                   |
| Mean corpuscular hemoglobin                    | MCH  | pg                          | Calculated: Wintrobe formulae "ADVIA 120™ System" Bayer                                            |
| Red cell distribution width                    | RDW  | %                           | Calculated: Standard deviation of RBC volume histogram/MCV (fl) x 100. "ADVIA 120™ System" Bayer   |
| Hemoglobin distribution width                  | HDW  | g/dL                        | Calculated: Standard deviation of RBC HC histogram. "ADVIA 120™ System" Bayer                      |
| Reticulocytes                                  | R    | %                           | Laser beam method with colorimetric reaction for nucleic acids. "ADVIA 120™ System" Bayer          |
| Reticulocytes absolutes                        | RAB  | $n \times 10^9/\text{L}$    | Laser beam method with colorimetric reaction for nucleic acids. "ADVIA 120™ System" Bayer          |
| Mean corpuscular volume of reticulocytes       | MCVr | fL                          | Mean of R volume histogram x MCV calibration factor. "ADVIA 120™ System" Bayer                     |
| Mean hemoglobin concentration of reticulocytes | CHCM | g/dL                        | Mean of R hemoglobin histogram "ADVIA 120™ System" Bayer                                           |
| Cellular hemoglobin of reticulocytes           | CHr  | pg                          | Calculated: Wintrobe formulae "ADVIA 120™ System" Bayer                                            |
| Platelets                                      | PLT  | $n \times 10^3/\mu\text{L}$ | Laser beam method. "ADVIA 120™ System" Bayer                                                       |
| Mean platelet volume                           | MPV  | fL                          | Mean platelet volume histogram "ADVIA 120™ System" Bayer                                           |
| Platelet distribution width                    | PDW  | %                           | Standard deviation of platelet volume histogram/ MPV (fl) x 100 "ADVIA 120™ System" Bayer          |
| Platelet hematocrit                            | PCT  | %                           | Mean platelet volume x PLT. "ADVIA 120™ System" Bayer                                              |
| White blood cells                              | WBC  | $n \times 10^3/\mu\text{L}$ | Laser beam method with "Baso/Lobularity method" and Peroxidase reaction. "ADVIA 120™ System" Bayer |

HEMATOLOGY METHODS (Cont.)

| PARAMETERS                                                                                                                                      | CODE                                     | UNIT                    | METHODS AND INSTRUMENTS                                                                                                       |
|-------------------------------------------------------------------------------------------------------------------------------------------------|------------------------------------------|-------------------------|-------------------------------------------------------------------------------------------------------------------------------|
| WBC differential count:<br>Neutrophils<br>Lymphocytes<br>Eosinophils<br>Basophils<br>Monocytes<br>Large unstained cells                         | N<br>LY<br>E<br>B<br>M<br>LU             | %                       | Peroxidase and Basophil/Lobularity method "ADVIA 120™ System" Bayer                                                           |
| Band Neutrophils<br>Segmented Neutrophils                                                                                                       | BANN<br>SEGN                             |                         |                                                                                                                               |
| WBC differential count:<br>Neutrophils ABS<br>Lymphocytes ABS<br>Eosinophils ABS<br>Basophils ABS<br>Monocytes ABS<br>Large unstained cells ABS | NAB<br>LYAB<br>EAB<br>BAB<br>MAB<br>LUAB | n x 10 <sup>3</sup> /μL | Peroxidase and Basophil/Lobularity method "ADVIA 120™ System" Bayer                                                           |
| Band Neutrophils ABS<br>Segmented Neutrophils ABS                                                                                               | BAAB<br>SEAB                             |                         |                                                                                                                               |
|                                                                                                                                                 |                                          |                         | Absolute number of Band and Segmented Neutrophils calculated on percentage of Band and Segmented Neutrophils and value of NAB |

## CLINICAL CHEMISTRY METHODS

| PARAMETERS                 | CODE  | UNIT  | METHODS AND INSTRUMENTS                                                                                                                |
|----------------------------|-------|-------|----------------------------------------------------------------------------------------------------------------------------------------|
| Urea                       | UREA  | mg/dL | Urease - GLDH": enzymatic UV test.<br>Kit: Horiba ABX adapted to the "Pentra 400" analyzer.                                            |
| Creatinine                 | CREA  | mg/dL | Colorimetric complex between the creatinine and the alkaline picrate (Jaffé).<br>Kit: Horiba ABX adapted to the "Pentra 400" analyzer. |
| Aspartate aminotransferase | AST   | IU/L  | UV-test according to IFCC modified method without pyridoxal phosphate.<br>Kit: Horiba ABX adapted to the "Pentra 400" analyzer.        |
| Alanine aminotransferase   | ALT   | IU/L  | UV-test according to IFCC modified method without pyridoxal phosphate.<br>Kit: Horiba ABX adapted to the "Pentra 400" analyzer.        |
| Alkaline phosphatase       | AP    | IU/L  | Kinetic photometric test, according to the IFCC.<br>Kit: Horiba ABX adapted to the "Pentra 400" analyzer.                              |
| G-Glutamyl transferase     | GGT   | IU/L  | Kinetic photometric test according to Szasz modified.<br>Kit: Horiba ABX adapted to the "Pentra 400" analyzer.                         |
| Total bilirubin            | T.BIL | mg/dL | Photometric test using 2,4-dichloroaniline.<br>Kit: Horiba ABX adapted to the "Pentra 400" analyzer.                                   |
| Total proteins             | TPRO  | g/dL  | Biuret reaction. End-point method.<br>Kit: Horiba ABX adapted to the "Pentra 400" analyzer.                                            |
| Albumin                    | ALB.  | g/dL  | Colorimetric determination using bromocresol green.<br>Kit: Horiba ABX adapted to the "Pentra 400" analyzer.                           |
| Globulin                   | GLOB  | g/dL  | Calculated parameter (T.Protein-Albumin) by Xybion.                                                                                    |
| Glucose                    | GLUC  | mg/dL | Enzymatic determination. (Trinder method).<br>Kit: Horiba ABX adapted to the "Pentra 400" analyzer.                                    |
| Triglycerides              | TG    | mg/dL | Enzymatic determination<br>Kit: Horiba ABX adapted to the "Pentra 400" analyzer.                                                       |
| Total Cholesterol          | TCHO  | mg/dL | "CHOD-PAP": enzymatic photometric test.<br>(Trinder's reaction).<br>Kit: Horiba ABX adapted to the "Pentra 400" analyzer.              |
| Calcium                    | Ca    | mg/dL | Photometric test using ortho-cresolphthalein complexone (OPC).<br>Kit: Horiba ABX adapted to the "Pentra 400" analyzer.                |
| Phosphorus                 | PHOS  | mg/dL | UV method using phosphomolybdate<br>Kit: Horiba ABX adapted to the "Pentra 400" analyzer.                                              |
| Sodium                     | Na    | mEq/L | Direct potentiometry ion selective electrodes.<br>ISE module on the "Pentra 400" analyzer                                              |
| Chloride                   | Cl    | mEq/L | Direct potentiometry ion selective electrodes.<br>ISE module on the "Pentra 400" analyzer                                              |
| Potassium                  | K     | mEq/L | Direct potentiometry ion selective electrodes.<br>ISE module on the "Pentra 400" analyzer                                              |
| Albumin/Globulin           | A/G   |       | Calculated parameter by Xybion                                                                                                         |

URINALYSIS METHODS

| PARAMETERS                                                                                    | CODE                                 | UNIT      | METHODS AND INSTRUMENTS                                 |
|-----------------------------------------------------------------------------------------------|--------------------------------------|-----------|---------------------------------------------------------|
| Appearance<br>Limpid<br>Turbid<br>Light Turbid                                                | L<br>T<br>LT                         |           | Turbidimetric method with Urysis 2400 (Roche).          |
| Colour:<br>Yellow<br>Amber<br>Orange<br>Greenish<br>Reddish<br>Brownish<br>Colorless<br>Other | Y<br>A<br>O<br>G<br>R<br>B<br>W<br>O |           | Photometric method with Urysis 2400 (Roche).            |
| Volume                                                                                        | VOL                                  | ml/16h    |                                                         |
| Specific Gravity                                                                              | S.G.                                 |           | Refractometric method with Urysis 2400 (Roche).         |
| pH                                                                                            | pH                                   |           |                                                         |
| Proteins                                                                                      | PRO                                  | Score 0-4 |                                                         |
| Nitrites                                                                                      | NIT                                  | " 0-1     | Semi-quantitative determination with Sticks Urysis 2400 |
| Glucose                                                                                       | GLU                                  | " 0-4     | Cassette                                                |
| Ketones                                                                                       | KETO                                 | " 0-3     | (Roche).                                                |
| Urobilinogen                                                                                  | UBG                                  | " 0-3     |                                                         |
| Bilirubin                                                                                     | BIL                                  | " 0-2     | Photometric method with Urysis 2400 (Roche).            |
| Hemoglobin/Red blood cells                                                                    | ERY                                  | " 0-3     |                                                         |
| White blood cells                                                                             | WBC                                  | " 0-2     |                                                         |

URINALYSIS METHODS (Cont.)

The scoring system is as follows:

| SCORE | PROTEINS<br>mg/dL | NITRITES | GLUCOSE<br>mg/dL | KETONES<br>mg/dL | UROBIL.<br>mg/dL | BILIR.<br>mg/dL | WHITE<br>B.CELLS<br>WBC/ $\mu$ L | HEMOGLOBIN<br>ERYTHROC.<br>RBC/ $\mu$ L |
|-------|-------------------|----------|------------------|------------------|------------------|-----------------|----------------------------------|-----------------------------------------|
| 0     | Absent            | Absent   | Absent           | Up to 5          | Up to 1          | Up to 1         | Up to 25                         | Up to 10                                |
| 1     | Up to 25          | Present  | Up to 50         | Up to 15         | Up to 4          | Up to 3         | Up to 100                        | Up to 50                                |
| 2     | Up to 75          | ...      | Up to 100        | Up to 50         | Up to 8          | Up to 6         | Up to 500                        | Up to 150                               |
| 3     | Up to 150         | ...      | Up to 300        | Up to 150        | Up to 12         | ...             | ...                              | Up to 250                               |
| 4     | Up to 500         | ...      | Up to 1000       | ...              | ...              | ...             | ...                              | ...                                     |
