# Supplementary material for: Fexinidazole – A New Oral Nitroimidazole Drug Candidate Entering Clinical Development for the Treatment of Sleeping Sickness
Source: PubMed Central journal article supplement (PMC3006138; doi:10.1371/journal.pntd.0000923), 2010-12-21
Supplement: pntd.0000923.s018.pdf [file pntd.0000923.s018.pdf]

## **Fexinidazole: 28-day Oral Toxicity Study in the Dog**

|                              |                |
|------------------------------|----------------|
| Product Name :               | Fexinidazole   |
| Study Number:                | 0505-2007      |
| Study Director/Author:       |                |
| Sponsor Reference Study No.: | Not applicable |
| Status:                      | Final          |

## SUMMARY

### Methods

Fexinidazole is a 5-nitroimidazole derivative biologically active against *Trypanosoma* parasites (*T.b. rhodesiense* and *T.b. brucei*).

The test article was given daily for twenty-eight days to five (control and high dose) or three (low and mid dose) beagle dogs/sex/dose at the doses of 0 (control group), 50, 200 and 800 mg/kg/day. The compound was administered orally, by gavage, as a suspension in 5% Tween 80 / 0.5% Methocel in a volume of 10 mL/kg/day. The control group received the vehicle alone (5% Tween 80 in 0.5% Methocel). At the end of the treatment period three animals/sex/group were sacrificed; the remaining animals of the control and high-dose groups were allowed a two-week recovery period.

Body weight was recorded weekly. Clinical signs and food consumption were recorded daily. Electrocardiographic, ophthalmoscopic and clinical pathology examinations were performed pretest and at the end of the treatment and recovery period.

A complete necropsy was performed on animals at the scheduled sacrifices (end of treatment and end of recovery); selected organs were weighed and collected. Histopathological examination was performed on all collected organs/tissues from control and high dose groups and additionally on bone marrow smears, sternum, mammary glands, ovaries and uterus from low and mid dose groups.

Systemic exposure to fexinidazole and of its sulfoxide and sulfone metabolites was evaluated on Days 1, 14 and 28 in the same animals used for the toxicological study.

### Results

No mortality and no treatment-related clinical signs were observed during the study.

A slight to moderate reduction in food intake was observed in four females given 800 mg/kg/day throughout the treatment period. Food intake was normal after the end of the treatment. Concurrently, slight to moderate progressive body weight loss was seen in the same four females. Two males of the high dose group showed a progressive moderate body weight loss without changes in food consumption.

No treatment-related findings were noted at electrocardiographic and ophthalmoscopic examination.

A minimal to slight decrease in lymphocytes was observed mainly at the high dose in both sexes. No meaningful changes were observed at clinical pathology.

At necropsy, no drug-related changes were observed at gross pathology or in organ weights, either at the end of the treatment or after recovery.

At the end of the treatment period, moderately reduced cellularity of the bone marrow, severe involution of the thymus and slight to moderate atrophy of the adipose tissue in the sternal and femoral marrow spaces and in the fat deposits adjacent to the renal pelvis were

noted in a single high dose male. Minimally reduced cellularity was also noted in the bone marrow of one male treated with 200 mg/kg/day. These changes were considered as a consequence of the body weight loss.

At the end of the recovery period, increased severity of involution was noted in the thymus of both sexes compared with controls, secondary to body weight loss.

After single and repeated administrations at the three dose levels, no relevant gender difference in the systemic exposure to fexinidazole was observed. AUCs of fexinidazole increased less than expected assuming dose proportionality in the dose range investigated. No accumulation of fexinidazole was observed.

Fexinidazole was extensively metabolized to the sulfone and sulfoxide derivatives both after single and repeated administration. No accumulation of either metabolite was observed.

Mean  $\pm$ SD systemic exposure to fexinidazole is reported in the following table:

| Dose (mg/kg/day) |     | Male            |                |                           | Female          |                 |                           |
|------------------|-----|-----------------|----------------|---------------------------|-----------------|-----------------|---------------------------|
|                  |     | Cmax (ng/mL)    | tmax (hour)    | AUC0-t(last) (ng-hour/mL) | Cmax (ng/mL)    | tmax (hour)     | AUC0-t(last) (ng-hour/mL) |
| 50 (n=3)         | D1  | 31.2 $\pm$ 12.4 | 0.5 $\pm$ 0    | 140 $\pm$ 147             | 42.4 $\pm$ 10.6 | 1 $\pm$ 0.87    | 237 $\pm$ 105             |
|                  | D14 | 26.5 $\pm$ 13   | 0.5 $\pm$ 0    | 52.1 $\pm$ 29.4           | 41.9 $\pm$ 2.2  | 1.67 $\pm$ 0.58 | 246 $\pm$ 117             |
|                  | D28 | 20.3 $\pm$ 7.89 | 1 $\pm$ 0      | 124 $\pm$ 67              | 36.3 $\pm$ 15.1 | 1 $\pm$ 0       | 87.1 $\pm$ 38.1           |
| 200 (n=3)        | D1  | 54.9 $\pm$ 10.8 | 1 $\pm$ 0.87   | 419 $\pm$ 61.4            | 84.1 $\pm$ 36.7 | 1 $\pm$ 0       | 454 $\pm$ 119             |
|                  | D14 | 78.1 $\pm$ 23.5 | 1 $\pm$ 0.87   | 452 $\pm$ 41.1            | 77.7 $\pm$ 50.8 | 2 $\pm$ 0       | 443 $\pm$ 217             |
|                  | D28 | 57.9 $\pm$ 12.5 | 1 $\pm$ 0      | 395 $\pm$ 15.8            | 73 $\pm$ 12     | 1 $\pm$ 0       | 377 $\pm$ 83.5            |
| 800 (n=5)        | D1  | 100 $\pm$ 21.2  | 1.1 $\pm$ 0.55 | 776 $\pm$ 182             | 184 $\pm$ 75.6  | 1.2 $\pm$ 0.45  | 895 $\pm$ 437             |
|                  | D14 | 128 $\pm$ 56.9  | 1 $\pm$ 0      | 929 $\pm$ 268             | 152 $\pm$ 44    | 1.4 $\pm$ 0.55  | 1170 $\pm$ 309            |
|                  | D28 | 86.2 $\pm$ 38.5 | 1.2 $\pm$ 0.4  | 736 $\pm$ 141             | 101 $\pm$ 47.1  | 1 $\pm$ 0       | 956 $\pm$ 378             |

Mean  $\pm$ SD systemic exposure to the sulfone metabolite is reported in the following table:

| Dose (mg/kg/day) |     | Male               |                 |                                                              | Female             |                 |                                                              |
|------------------|-----|--------------------|-----------------|--------------------------------------------------------------|--------------------|-----------------|--------------------------------------------------------------|
|                  |     | Cmax ( $\mu$ g/mL) | tmax (hour)     | AUC0-t(last) ( $\mu$ g-hour/mL)                              | Cmax ( $\mu$ g/mL) | tmax (hour)     | AUC0-t(last) ( $\mu$ g-hour/mL)                              |
| 50 (n=3)         | D1  | 7.17 $\pm$ 1.74    | 8 $\pm$ 0       | 126 $\pm$ 28.1                                               | 10 $\pm$ 1.6       | 6.67 $\pm$ 2.31 | 170 $\pm$ 37.8                                               |
|                  | D14 | 5.57 $\pm$ 2.19    | 4 $\pm$ 0       | 78 $\pm$ 35.3                                                | 9.98 $\pm$ 1.25    | 6.67 $\pm$ 2.31 | 173 $\pm$ 26.9                                               |
|                  | D28 | 7.11 $\pm$ 1.21    | 8 $\pm$ 0       | 121 $\pm$ 19.1                                               | 6.79 $\pm$ 0.56    | 3.33 $\pm$ 1.15 | 107 $\pm$ 22.5                                               |
| 200 (n=3)        | D1  | 17.2 $\pm$ 1.69    | 13.3 $\pm$ 9.24 | 338 $\pm$ 50.8                                               | 18.1 $\pm$ 3.42    | 12 $\pm$ 10.6   | 358 $\pm$ 85.7                                               |
|                  | D14 | 22 $\pm$ 5.59      | 5.33 $\pm$ 2.31 | 387 $\pm$ 49.5                                               | 21.5 $\pm$ 2.42    | 5.33 $\pm$ 2.31 | 381 $\pm$ 61.2                                               |
|                  | D28 | 14 $\pm$ 3.31      | 4 $\pm$ 4       | 258 $\pm$ 48                                                 | 15.4 $\pm$ 2.66    | 11.7 $\pm$ 10.1 | 277 $\pm$ 29.9                                               |
| 800 (n=5)        | D1  | 38.6 $\pm$ 2.83    | 17.6 $\pm$ 8.76 | 705 $\pm$ 94.9                                               | 33.6 $\pm$ 10.9    | 11.2 $\pm$ 7.16 | 614 $\pm$ 216                                                |
|                  | D14 | 34.6 $\pm$ 7.42    | 5.6 $\pm$ 2.19  | 640 $\pm$ 163                                                | 38.6 $\pm$ 4.73    | 8 $\pm$ 0       | 667 $\pm$ 67.8                                               |
|                  | D28 | 20.8 $\pm$ 4.14    | 12.4 $\pm$ 9.81 | 388 $\pm$ 68.2 <sup>(1)</sup><br>601 $\pm$ 29 <sup>(2)</sup> | 26 $\pm$ 7.7       | 7.2 $\pm$ 1.79  | 477 $\pm$ 145 <sup>(1)</sup><br>693 $\pm$ 351 <sup>(2)</sup> |

<sup>(1)</sup> AUC0-24; <sup>(2)</sup> n=2

Mean  $\pm$ SD systemic exposure to the sulfoxide metabolite is reported in the following table:

| Dose<br>(mg/kg/<br>day) |     | Male                  |                 |                                    | Female                |                 |                                    |
|-------------------------|-----|-----------------------|-----------------|------------------------------------|-----------------------|-----------------|------------------------------------|
|                         |     | Cmax<br>( $\mu$ g/mL) | tmax<br>(hour)  | AUC0-t(last)<br>( $\mu$ g-hour/mL) | Cmax<br>( $\mu$ g/mL) | tmax<br>(hour)  | AUC0-t(last)<br>( $\mu$ g-hour/mL) |
| 50 (n=3)                | D1  | 3.55 $\pm$ 1.3        | 1 $\pm$ 0       | 19.2 $\pm$ 5.82                    | 3.97 $\pm$ 0.74       | 1.33 $\pm$ 0.58 | 20 $\pm$ 6.81                      |
|                         | D14 | 2.24 $\pm$ 0.45       | 1 $\pm$ 0       | 8.51 $\pm$ 2.53                    | 3.73 $\pm$ 0.73       | 1.67 $\pm$ 0.58 | 18.8 $\pm$ 2.06                    |
|                         | D28 | 1.83 $\pm$ 0.57       | 1.67 $\pm$ 0.58 | 14.2 $\pm$ 2.72                    | 2.72 $\pm$ 0.73       | 1 $\pm$ 0       | 9.88 $\pm$ 2.72                    |
| 200 (n=3)               | D1  | 7.55 $\pm$ 1.03       | 1.67 $\pm$ 0.58 | 50.7 $\pm$ 8.61                    | 8.7 $\pm$ 3.95        | 0.83 $\pm$ 0.29 | 52.1 $\pm$ 20.6                    |
|                         | D14 | 8.96 $\pm$ 2.53       | 2 $\pm$ 0       | 56.1 $\pm$ 9.96                    | 9.02 $\pm$ 3.69       | 2 $\pm$ 0       | 57.2 $\pm$ 24.3                    |
|                         | D28 | 5.76 $\pm$ 1.17       | 1.33 $\pm$ 0.58 | 42.2 $\pm$ 6.46                    | 5.43 $\pm$ 0.34       | 1 $\pm$ 0       | 33.8 $\pm$ 1.65                    |
| 800 (n=5)               | D1  | 13.4 $\pm$ 3.22       | 1.5 $\pm$ 0.71  | 104 $\pm$ 11.3                     | 15.6 $\pm$ 4.64       | 1.6 $\pm$ 0.55  | 121 $\pm$ 44.4                     |
|                         | D14 | 12.5 $\pm$ 2.85       | 1.2 $\pm$ 0.45  | 113 $\pm$ 39.9                     | 14.8 $\pm$ 5.1        | 2 $\pm$ 1.22    | 144 $\pm$ 37.1                     |
|                         | D28 | 9.35 $\pm$ 3.55       | 1.6 $\pm$ 0.55  | 74.3 $\pm$ 14.4 <sup>(1)</sup>     | 9.48 $\pm$ 3.38       | 1.4 $\pm$ 0.55  | 89 $\pm$ 45.2                      |
|                         |     |                       |                 | 121 $\pm$ 33 <sup>(2)</sup>        |                       |                 |                                    |

<sup>(1)</sup> AUC0-24; <sup>(2)</sup> n=2

## Conclusions

Fexinidazole, given orally to beagle dogs at the doses of 50, 200 and 800 mg/kg/day for 28 consecutive days, was well tolerated.

Slight to moderate body weight loss and reduction in food intake was observed at the dose of 800 mg/kg/day during the treatment period.

A minimal to slight decrease in lymphocytes was seen at the high dose.

Fexinidazole was extensively metabolized to the sulfone and sulfoxide derivatives both after single and repeated administration.

In the conditions applied in the present study, the dose of 200 mg/kg/day can be considered as the NOEL.

**TABLE OF CONTENTS**

1. INTRODUCTION AND OBJECTIVES .....10

2. STUDY SPONSOR .....10

3. TEST FACILITY .....10

4. REGULATORY REQUIREMENTS.....10

5. SCHEDULE.....10

6. MATERIALS AND METHODS.....11

    6.1. Test and Control Items .....11

        6.1.1. Test Item .....11

        6.1.2. Vehicle/Control Item.....11

        6.1.3. Test Formulation .....11

        6.1.4. Test Formulation Analyses .....11

    6.2. Test System .....12

        6.2.1. Allocation/Randomization .....12

        6.2.2. Identification .....12

        6.2.3. Environmental Conditions .....12

    6.3. Experimental Design .....13

        6.3.1. Dose Administration .....13

        6.3.2. Dose Justification .....14

    6.4. Clinical and physical examinations .....14

    6.5. Clinical Pathology .....15

        6.5.1. Hematology .....15

        6.5.2. Coagulation .....15

        6.5.3. Clinical Chemistry .....15

        6.5.4. Urine Analysis.....16

    6.6. Post mortem examinations .....16

        6.6.1. Unscheduled Deaths.....16

        6.6.2. Scheduled Necropsy, Tissue Collection, and Tissue Examination.....16

        6.6.3. Tissue Preparation.....18

        6.6.4. Peer review.....18

---

|                                                |    |
|------------------------------------------------|----|
| 6.7. Systemic Exposure .....                   | 18 |
| 7. DATA ACQUISITION.....                       | 19 |
| 8. STATISTICAL ANALYSIS .....                  | 19 |
| 8.1. Variables.....                            | 19 |
| 8.2. Methods .....                             | 19 |
| 9. ARCHIVING .....                             | 19 |
| 10. STUDY DEVIATIONS .....                     | 20 |
| 11. STUDY PERSONNEL .....                      | 20 |
| 12. RESULTS .....                              | 20 |
| 12.1. Clinical and Physical Examination.....   | 20 |
| 12.1.1. Mortality.....                         | 20 |
| 12.1.2. Clinical Signs .....                   | 20 |
| 12.1.3. Body Weight .....                      | 20 |
| 12.1.4. Food consumption.....                  | 21 |
| 12.1.5. Electrocardiographic examination ..... | 21 |
| 12.1.6. Ophthalmoscopic examination.....       | 22 |
| 12.2. Clinical pathology .....                 | 22 |
| 12.2.1. Hematology .....                       | 22 |
| 12.2.2. Coagulation .....                      | 22 |
| 12.2.3. Clinical chemistry .....               | 23 |
| 12.2.4. Urinalysis .....                       | 23 |
| 12.3. Post-mortem examinations .....           | 23 |
| 12.3.1. Organ Weights .....                    | 23 |
| 12.3.2. Gross Pathology .....                  | 23 |
| 12.3.3. Histopathology .....                   | 24 |
| 12.4. Systemic Exposure Evaluation .....       | 24 |
| 13. DISCUSSION .....                           | 27 |
| 14. CONCLUSIONS.....                           | 28 |
| 15. REFERENCES .....                           | 28 |
| 16. FIGURES.....                               | 30 |
| 16.1. Body weight.....                         | 30 |

## TABLES

- Table 1 Clinical Signs
- Table 2 Body Weights
- Table 3 ECG Examinations
- Table 4 Ophthalmoscopic Examination
- Table 5 Hematology
- Table 6 Coagulation
- Table 7 Clinical Chemistry
- Table 8 Urinalysis, Quantitative
- Table 9 Urinalysis, Semi-quantitative
- Table 10 Absolute Organ Weights
- Table 11 Organ/Terminal Body Weight Ratios
- Table 12 Gross Pathology
- Table 13 Microscopic Pathology
- Table 14 Histological changes in ovaries
- Table 15 Stage of Estrus Evaluation

## APPENDICES

- Appendix 1 QA Statement
- Appendix 2 Clinical Signs
- Appendix 3 Body Weights
- Appendix 4 ECG Examinations
- Appendix 5 Ophthalmoscopic Examination
- Appendix 6 Hematology
- Appendix 7 Coagulation
- Appendix 8 Clinical Chemistry
- Appendix 9 Urinalysis
- Appendix 10 Absolute Organ Weights
- Appendix 11 Organ/Terminal Body Weight Ratios
- Appendix 12 Gross And Microscopic Pathology
- Appendix 13 Toxicokinetic Report
- Appendix 14 Clinical Pathology Methods
- Appendix 15 Pharmacy Documentation
- Appendix 16 Protocol and Amendment

## 1. INTRODUCTION AND OBJECTIVES

The purpose of this study (0505-2007) was to determine the tolerability of and systemic exposure to fexinidazole when given orally for 28 consecutive days to beagle dogs, by gavage. Reversal of possible toxic effects was evaluated in control and high-dose groups over a two-week observation period.

Systemic exposure was assessed in the same animals used for toxicological evaluation.

Fexinidazole is a 5-nitroimidazole derivative, biologically active against *Trypanosoma* parasites (*T.b.rhodesiense* and *T.b. brucei*) and useful in the treatment of the Human African trypanosomiasis (HAT), known as sleeping sickness.

## 2. STUDY SPONSOR

DNDi – Drugs for Neglected Diseases *Initiative*  
1 Place St Gervais  
CH – 1201 Geneva, Switzerland

## 3. TEST FACILITY

Accelera  
.

## 4. REGULATORY REQUIREMENTS

This study was conducted in compliance with:

- Decreto Legislativo 2 Marzo 2007, No. 50;
- Organisation for Economic Co-operation and Development (OECD) Principles of Good Laboratory Practice (GLP) (as revised in 1997).

The methods employed in this study were those described in the "Standard Operating Procedures" of the laboratories involved.

## 5. SCHEDULE

|                                                 |                      |                      |
|-------------------------------------------------|----------------------|----------------------|
| Experimental Start Date<br>(Randomization Date) | January 24, 2008     |                      |
|                                                 | Males                | Females              |
| First Dose (Day 1)                              | January 29, 2008     | January 30, 2008     |
| Last Dose (Day 28)                              | February 25, 2008    | February 26, 2008    |
| Necropsy – Dosing Phase (Day 29-30)             | February 26-27, 2008 | February 27-28, 2008 |
| Start of recovery (Day 29)                      | February 26, 2008    | February 27, 2008    |
| Necropsy – End of Recovery period<br>(Day 43)   | March 11, 2008       | March 12, 2008       |
| Experimental Completion Date                    | March 12, 2008       |                      |



## 6. MATERIALS AND METHODS

### 6.1. Test and Control Items

#### 6.1.1. Test Item

|                                                                                                                                                                             |                                                |
|-----------------------------------------------------------------------------------------------------------------------------------------------------------------------------|------------------------------------------------|
| Identification                                                                                                                                                              | Fexinidazole                                   |
| Lot/Batch Number                                                                                                                                                            | 3168-07-01/O                                   |
| Purity and Expiry                                                                                                                                                           | 100% October 2008                              |
| Storage Conditions                                                                                                                                                          | Room temperature, protected from light         |
| Source and Manufacturer                                                                                                                                                     | Centipharm (formerly Orgasynth Industries)     |
| Special Handling Precautions                                                                                                                                                | According to MSDS (Material Safety Data Sheet) |
| The amount of the test article received and used at Accelera, Nerviano Medical Sciences was recorded according to Accelera, Nerviano Medical Sciences' standard procedures. |                                                |

#### 6.1.2. Vehicle/Control Item

|                         |                                                                            |                                |
|-------------------------|----------------------------------------------------------------------------|--------------------------------|
| Identification          | 5% Tween 80 in 0.5% Methyl cellulose 400 cP (Methocel) suspension in water |                                |
| Lot/Batch Number        | Tween 80<br>Methyl cellulose 400 cP                                        | 1324202<br>125K0196            |
| Expiry                  | Tween 80<br>Methyl cellulose 400 cP                                        | February 2011<br>January 2009  |
| Storage Conditions      | Room Temperature                                                           |                                |
| Source and Manufacturer | Tween 80<br>Methyl cellulose 400 cP                                        | Sigma-Aldrich<br>Sigma-Aldrich |
| Method of Preparation   | On file of ADMET/Preclinical Formulation                                   |                                |

#### 6.1.3. Test Formulation

|                          |                                                                   |
|--------------------------|-------------------------------------------------------------------|
| Type of Formulation      | 5% Tween 80 in 0.5% Methyl cellulose 400 cP (Methocel) suspension |
| Method of Preparation    | On file at Accelera/Experimental ADMET/Preclinical Formulation    |
| Frequency of Preparation | The suspensions were prepared according to the stability data     |
| Dose Concentrations      | 5, 20, 80 mg/mL                                                   |
| Storage Conditions       | Room temperature                                                  |
| Source and Manufacturer  | Accelera/Experimental ADMET/Preclinical Formulation               |

#### 6.1.4. Test Formulation Analyses

##### 6.1.4.1. Concentration/Homogeneity

Samples (top-middle-bottom, 5 mL each) of each dose suspension prepared for the first and the last week of treatment (Weeks 1 and 4) were collected under stirring for fexinidazole concentration and homogeneity checks; 10 mL were also taken from the vehicle. After collection, samples were directly transferred at room temperature to Accelera/DMPK & ART/Bioanalysis and Analytical Control for analysis. The analyses were performed using a validated HPLC-UV method [1].

### 6.1.4.2. Stability

Stability data indicated that fexinidazole/5% Tween 80 in 0.5% Methyl cellulose 400 cP (Methocel) suspension in the range 0.5-100 mg/mL is stable for 7 days at room temperature or for 14 days at +4°C [1].

All values were found to be within acceptable limits for the solutions.

## 6.2. Test System

|                                      |                                                                                                                 |
|--------------------------------------|-----------------------------------------------------------------------------------------------------------------|
| Species/Strain or Breed, Source, Sex | Male and female dog/Beagle, Marshall, Europe                                                                    |
| Justification of Species             | The dog has been used extensively in safety studies and a large amount of biological data is available.         |
| Age                                  | About one year                                                                                                  |
| Weight                               | 6.83 to 9.87 kg                                                                                                 |
| Acclimation                          | At least 20 days                                                                                                |
| Selection Criteria                   | Acceptable findings from pretest observations, body weight, physical examinations, some laboratory examinations |
| Pretest Animals                      | 20/sex                                                                                                          |

### 6.2.1. Allocation/Randomization

Animals were randomly assigned to treatment groups based on the most recent pretest body weight. After excluding animals with unacceptable pretest findings, a computer program included in the Xybio Path/Tox system designed to achieve balance with respect to pretest body weights was used to exclude animals from both body weight extremes and randomize the remaining animals to treatment groups.

### 6.2.2. Identification

Animals were identified by individual tattoos and numbered collars (collars could be removed if required).

A color-coded cage card was affixed to each cage and indicated the study number and type, treatment start date, test article, animal number, sex and dose level.

| Test Group | Color Code | Animal ID numbers                         |                                          |
|------------|------------|-------------------------------------------|------------------------------------------|
|            |            | Males                                     | Females                                  |
| 1          | White      | 2516, 2518, 2520<br>Recovery.: 2527, 2533 | 2560, 2568, 2572<br>Recovery: 2575, 2577 |
| 2          | Yellow     | 2514, 2521, 2529                          | 2562, 2563, 2576                         |
| 3          | Green      | 2515, 2523, 2526                          | 2561, 2570, 2567                         |
| 4          | Red        | 2517, 2519, 2525<br>Recovery: 2528, 2530  | 2564, 2565, 2569<br>Recovery: 2571, 2573 |

### 6.2.3. Environmental Conditions

|         |                                                  |
|---------|--------------------------------------------------|
| Caging  | Individual pens – Rooms 11, 12, 13, 18, 19, 20/C |
| Bedding | None                                             |

|             |                                                                              |
|-------------|------------------------------------------------------------------------------|
| Temperature | 18°C to 21°C                                                                 |
| Air changes | 15 +/- 5 air changes per hour                                                |
| Humidity    | 40% to 70% relative humidity; monitored                                      |
| Lighting    | Approximate 12-hour light, 12-hour dark cycle (light from 6 a.m. to 6 p.m.). |
| Water       | Municipal mains, available ad libitum via an auto-watering system            |
| Diet        | Altromin H (A. Rieper, Vandoies, Italy), about 300 g/day                     |

Actual conditions were continuously monitored, recorded and records retained. Release of each lot of feed by the manufacturers was based on analysis of composite samples of each lot, which had met specifications set by the manufacturers. Water was periodically analyzed for chemical and microbial impurities. No contaminants were identified in the food or water, that were deemed to interfere with the results or conclusions of this study.

All the above environmental conditions, as well as all the procedures adopted throughout the study for housing and handling the animals were in strict compliance with EEC and Italian Guidelines for Laboratory Animal Welfare.

### 6.3. Experimental Design

The study was performed according to the following experimental scheme:

| Test Group | Dose<br>(tentative)<br>(mg/kg/day) | Number of Animals/Group |         |          |         |
|------------|------------------------------------|-------------------------|---------|----------|---------|
|            |                                    | Main Study              |         | Recovery |         |
|            |                                    | Males                   | Females | Males    | Females |
| 1          | 0 (vehicle) <sup>a</sup>           | 3                       | 3       | 2        | 2       |
| 2          | 50                                 | 3                       | 3       | -        | -       |
| 3          | 200                                | 3                       | 3       | -        | -       |
| 4          | 800                                | 3                       | 3       | 2        | 2       |

a: 5% Tween 80 in 0.5% Methyl cellulose 400 cP (Methocel) suspension

Animals were treated orally, by gavage, daily for 28 consecutive days. At the end of the treatment period, all animals from groups 2 and 3 and the first three animals in numerical order from groups 1 and 4 (or otherwise chosen on the basis of the outcome of the study) were sacrificed; the remaining animals were allowed a two-week recovery period.

#### 6.3.1. Dose Administration

|                  |                                                                                                     |
|------------------|-----------------------------------------------------------------------------------------------------|
| Method and Route | Os, gavage                                                                                          |
| Duration         | 28 days                                                                                             |
| Frequency        | Once daily, at approximately the same time                                                          |
| Volume           | 10 mL/kg/day; Individual dose volumes were calculated based on the most recent body weight recorded |
| Rate             | Not applicable                                                                                      |
| Special Notes    | Stir during administration.                                                                         |

### 6.3.2. Dose Justification

The doses were chosen in agreement with the Sponsor on the basis of the results of preliminary oral repeated dose study No. 0338-2007 in which a decrease in food consumption and mild body weight loss were observed in one out of two animals given daily escalating doses of the test article in Phase I of the study (200 mg/kg/day x 4 days +400x4 + 800x4) and in one out of two animals given 800 mg/kg/day for 7 days.

The oral route and the daily administration schedule are those envisaged for the clinical setting.

### 6.4. Clinical and physical examinations

|                                       |                                                                                                                                                                                                                                                                                                                                                                                                                                                                                                                                                                                                                                                                                                                                                                                                                                                                                                                                             |
|---------------------------------------|---------------------------------------------------------------------------------------------------------------------------------------------------------------------------------------------------------------------------------------------------------------------------------------------------------------------------------------------------------------------------------------------------------------------------------------------------------------------------------------------------------------------------------------------------------------------------------------------------------------------------------------------------------------------------------------------------------------------------------------------------------------------------------------------------------------------------------------------------------------------------------------------------------------------------------------------|
| Survival and Moribundity Observations | At least once a day during the pre-test and recovery periods; at least twice a day during the treatment period                                                                                                                                                                                                                                                                                                                                                                                                                                                                                                                                                                                                                                                                                                                                                                                                                              |
| Clinical Signs                        | Every day, at least one session/day                                                                                                                                                                                                                                                                                                                                                                                                                                                                                                                                                                                                                                                                                                                                                                                                                                                                                                         |
| Body Weights                          | Once pretest, on Day 1, then weekly                                                                                                                                                                                                                                                                                                                                                                                                                                                                                                                                                                                                                                                                                                                                                                                                                                                                                                         |
| Food Consumption                      | Daily, qualitative, by visual inspection. Only reduced intake was reported.                                                                                                                                                                                                                                                                                                                                                                                                                                                                                                                                                                                                                                                                                                                                                                                                                                                                 |
| Electrocardiographic Evaluation       | <p>Pretest and at the end of the treatment period (Day 24) and the recovery period (Day 37 or 38). In addition ECG recording was repeated during the pretest period for animal 2568 to further check rhythm.</p> <p>ECGs were recorded from fully conscious manually restrained animals at least from I, II, III, aVR, aVL, aVF and, whenever possible, from precordial leads V1 (rV2), V3 (V2) and V5 (V4).</p> <p>Morphologic review for changes in waveform morphology and for the presence of arrhythmias and interval measurement were conducted on all recordings. The following parameters were measured or computed: heart rate, RR interval, P-R interval, QRS complex width, Q-T interval and Q-T interval corrected for heart rate using Fridericia's formula (<math>QT/RR^{1/3}</math>). In addition P wave width, P, Q, R, S and T wave heights and ST segment deviation were measured, and mean electrical axis computed.</p> |
| Ophthalmoscopy                        | <p>Pretest and at the end of the treatment (Day 24) and the recovery period (Day 37 or 38).</p> <p>The examination was performed using an indirect ophthalmoscope and a slit lamp when necessary. Mydriasis was induced by instilling one drop of 0.5% tropicamide (Visumidriatic) solution into each eye. The following were examined: conjunctiva, cornea, sclera, anterior chamber, iris, lens, vitreous body and fundus.</p>                                                                                                                                                                                                                                                                                                                                                                                                                                                                                                            |

## 6.5. Clinical Pathology

### 6.5.1. Hematology

|                      |                                                               |
|----------------------|---------------------------------------------------------------|
| Collection Intervals | Pretest and at the end of the treatment and recovery periods. |
| Number of Animals    | All animals                                                   |
| Collection Site      | Jugular vessels                                               |
| Anesthesia           | None                                                          |
| Fasting Requirements | Overnight (about 16 hours)                                    |
| Unscheduled Samples  | None                                                          |
| Target Blood Volume  | 0.5 mL                                                        |
| Anticoagulant        | 8% EDTA solution                                              |

#### Hematology Parameters Evaluated

|                                           |                                                                 |
|-------------------------------------------|-----------------------------------------------------------------|
| White Blood Cells                         | Reticulocyte Count (absolute and percent)                       |
| Red Blood Cells                           | Mean Corpuscular Volume reticulocyte (MCVr)                     |
| Hemoglobin                                | Mean Corpuscular Hemoglobin reticulocyte (CHR)                  |
| Hematocrit                                | Mean Corpuscular Hemoglobin Concentration reticulocytes (CHCMr) |
| Mean Corpuscular Volume                   | Platelets                                                       |
| Mean Corpuscular Hemoglobin               | Mean Platelet Volume                                            |
| Mean Corpuscular Hemoglobin Concentration | Platelet Distribution Width                                     |
| Red Cell Distribution Width               | Platelet Hematocrit                                             |
| Hemoglobin Distribution Width             | Differential White Blood Cells (absolute and percent)           |

### 6.5.2. Coagulation

|                      |                                                               |
|----------------------|---------------------------------------------------------------|
| Collection Intervals | Pretest and at the end of the treatment and recovery periods. |
| Number of Animals    | All                                                           |
| Collection Site      | Jugular vessels                                               |
| Anesthesia           | None                                                          |
| Fasting Requirements | Overnight (about 16 hours) for scheduled samplings            |
| Unscheduled Sampling | None                                                          |
| Target Blood Volume  | About 2.5 mL                                                  |
| Anticoagulant        | 3.8% sodium citrate solution                                  |

#### Coagulation Parameters Evaluated

|                                             |                        |
|---------------------------------------------|------------------------|
| Activated Partial Thromboplastin Time       | Prothrombin Time       |
| Activated Partial Thromboplastin Time Ratio | Prothrombin Time Ratio |
| Fibrinogen                                  |                        |

### 6.5.3. Clinical Chemistry

|                      |                                                               |
|----------------------|---------------------------------------------------------------|
| Collection Intervals | Pretest and at the end of the treatment and recovery periods. |
| Number of Animals    | All animals                                                   |
| Collection Site      | Jugular vessels                                               |
| Anesthesia           | None                                                          |
| Fasting Requirements | Overnight (about 16 hours)                                    |
| Unscheduled Samples  | None                                                          |
| Target Blood Volume  | 1 mL in tube for serum separation                             |
| Anticoagulant        | None                                                          |

**Clinical Chemistry Parameters Evaluated**

|                            |                                     |
|----------------------------|-------------------------------------|
| Urea                       | Creatinine                          |
| Alanine Aminotransferase   | Aspartate Aminotransferase          |
| Alkaline Phosphatase       | Total Bilirubin                     |
| Albumin                    | Total Proteins                      |
| Glucose                    | Globulin                            |
| Gamma-glutamyl transferase | Total Cholesterol                   |
| Triglycerides              | Calcium                             |
| Phosphorus                 | Albumin/Globulin Ratio (calculated) |
| Sodium                     | Potassium                           |
| Chloride                   |                                     |

**6.5.4. Urine Analysis**

|                       |                                                               |
|-----------------------|---------------------------------------------------------------|
| Collection Intervals  | Pretest and at the end of the treatment and recovery periods. |
| Number of Animals     | All                                                           |
| Method of Collection  | Metabolic cages                                               |
| Sample Requirements   | 1% Thimerosal (4ml) in each bottle, before collection         |
| Fasting Requirements  | Overnight (about 16 hours) for scheduled samplings            |
| Unscheduled Samplings | None                                                          |

**Urine Parameters Evaluated**

|                                            |                            |
|--------------------------------------------|----------------------------|
| Total Volume                               |                            |
| Macroscopic Appearance (Color, Appearance) | Ketone Bodies              |
| pH                                         | Urobilinogen               |
| White Blood Cells                          | Bilirubin                  |
| Nitrites                                   | Hemoglobin/Red Blood Cells |
| Proteins                                   | Specific Gravity           |
| Glucose                                    |                            |

**6.6. Post mortem examinations****6.6.1. Unscheduled Deaths**

No animal died during the study.

**6.6.2. Scheduled Necropsy, Tissue Collection, and Tissue Examination**

|                         |                                                                       |                          |
|-------------------------|-----------------------------------------------------------------------|--------------------------|
|                         | End of treatment necropsy                                             | End of recovery necropsy |
| Sacrifice Schedule      | Days 29-30                                                            | Day 43                   |
| Number of Animals       | The first three/group in numerical order                              | Remaining animals        |
| Method of Euthanasia    | Sodium thiopental anesthesia and exsanguination from the femoral vein |                          |
| Fasting Requirements    | Overnight for scheduled sacrifices                                    |                          |
| Terminal Body Weight    | All animals                                                           |                          |
| Macroscopic Examination | All animals                                                           |                          |

Organs/tissues from animals surviving to scheduled sacrifice were collected, weighed and examined microscopically (E) according to the following table. Paired organs were weighed together. Relative organ weights were calculated on terminal body weight.

CONFIDENTIAL

Fexinidazole  
Study Report for Study: 0505-2007

0505-2007-R

| Organ/Tissue                                          | All animals    |         | Examined (mg/kg/day)<br>All animals |       |       |     |
|-------------------------------------------------------|----------------|---------|-------------------------------------|-------|-------|-----|
|                                                       | Collected      | Weighed | 0                                   | 50    | 200   | 800 |
| Aorta                                                 | X              |         | E                                   |       |       | E   |
| Adrenal glands (both)                                 | X              | X       | E                                   |       |       | E   |
| Bone marrow smear                                     | X              |         | E                                   | E (m) | E (m) | E   |
| Brain                                                 | X <sup>a</sup> | X       | E                                   |       |       | E   |
| Diaphragm                                             | X              |         | E                                   |       |       | E   |
| Epididymides (both)                                   | X              |         | E                                   |       |       | E   |
| Esophagus                                             | X              |         | E                                   |       |       | E   |
| Eyes, optic nerve (both)                              | X              |         | E                                   |       |       | E   |
| Heart                                                 | X              | X       | E                                   |       |       | E   |
| Duodenum                                              | X              |         | E                                   |       |       | E   |
| Jejunum                                               | X              |         | E                                   |       |       | E   |
| Ileum                                                 | X              |         | E                                   |       |       | E   |
| Cecum                                                 | X              |         | E                                   |       |       | E   |
| Colon                                                 | X              |         | E                                   |       |       | E   |
| Gallbladder                                           | X              |         | E                                   |       |       | E   |
| Femur head                                            | X              |         | E                                   |       |       | E   |
| Kidneys (both)                                        | X              | X       | E                                   |       |       | E   |
| Lacrimal glands                                       | X              |         | E                                   |       |       | E   |
| Liver                                                 | X <sup>a</sup> | X       | E                                   |       |       | E   |
| Lungs                                                 | X              |         | E                                   |       |       | E   |
| Lymph node, mandibular                                | X              |         | E                                   |       |       | E   |
| Lymph node, mesenteric                                | X              |         | E                                   |       |       | E   |
| Mammary gland                                         | X              |         | E                                   | E (f) | E (f) | E   |
| Ovaries                                               | X              | X       | E                                   | E     | E     | E   |
| Pancreas                                              | X              |         | E                                   |       |       | E   |
| Pituitary                                             | X              |         | E                                   |       |       | E   |
| Prostate                                              | X              | X       | E                                   |       |       | E   |
| Salivary glands (mandibular, parotids)                | X              |         | E                                   |       |       | E   |
| Sciatic nerve                                         | X              |         | E                                   |       |       | E   |
| Skeletal muscle                                       | X              |         | E                                   |       |       | E   |
| Skin                                                  | X              |         | E                                   |       |       | E   |
| Spinal cord (cervical)                                | X              |         | E                                   |       |       | E   |
| Spleen                                                | X              | X       | E                                   |       |       | E   |
| Sternum                                               | X              |         | E                                   |       |       | E   |
| Stomach                                               | X              |         | E                                   |       |       | E   |
| Testes (both)                                         | X              | X       | E                                   |       |       | E   |
| Thymus                                                | X              | X       | E                                   |       |       | E   |
| Thyroid glands (with parathyroid glands) <sup>b</sup> | X              |         | E                                   |       |       | E   |
| Tongue                                                | X              |         | E                                   |       |       | E   |
| Trachea                                               | X              |         | E                                   |       |       | E   |
| Urinary bladder                                       | X              |         | E                                   |       |       | E   |
| Uterus                                                | X              |         | E                                   | E     | E     | E   |
| Vagina                                                | X              |         | E                                   | E     | E     | E   |
| Lesions                                               | X              |         | E                                   | E     | E     | E   |

| Organ/Tissue                                                                                                                                                                                                                                                                                                                                                                                                                                                                                                                                                                                                                                                                                                                          | All animals |         | Examined (mg/kg/day)<br>All animals |    |     |     |
|---------------------------------------------------------------------------------------------------------------------------------------------------------------------------------------------------------------------------------------------------------------------------------------------------------------------------------------------------------------------------------------------------------------------------------------------------------------------------------------------------------------------------------------------------------------------------------------------------------------------------------------------------------------------------------------------------------------------------------------|-------------|---------|-------------------------------------|----|-----|-----|
|                                                                                                                                                                                                                                                                                                                                                                                                                                                                                                                                                                                                                                                                                                                                       | Collected   | Weighed | 0                                   | 50 | 200 | 800 |
| Histological examination was performed on all tissues/organs from dogs of the control and high dose group killed terminally and at the end of the recovery period. For organs/tissues showing treatment-related changes the examination was extended to the other dose-groups as necessary to establish a no-effect level.<br>a Samples of liver and brain were collected and frozen in liquid nitrogen and kept at -80°C as required by the Sponsor<br>b Parathyroid glands examined microscopically if included in the section of thyroid glands<br><br>(f) females only<br>(m) males only<br><br>Fixatives:<br>Eyes: Davidson's solution<br>Bone Marrow Smears: Methanol-ether<br>All Other Tissues: 10% neutral buffered formalin |             |         |                                     |    |     |     |

### 6.6.3. Tissue Preparation

Histological sections of all tissues listed in Section 6.6.2 were trimmed, embedded, sectioned, and stained with hematoxylin and erythrosine. Bone marrow smears were prepared and stained with May Grünwald-Giemsa.

All organs/tissues were kept for any further test necessary.

### 6.6.4. Peer review

A pathology peer review was conducted by Anna Maria Giusti. A report was produced and filed with the study raw-data.

## 6.7. Systemic Exposure

The toxicokinetics of fexinidazole and its metabolites M1 (sulfoxide) and M2 (sulfone) were evaluated in accordance with the collection schedule and procedures tabulated below. The bioanalysis were conducted by DMPK & ART – Bioanalysis/Analytical Control, Nerviano.

|                              |                                                                                                                                                                                                             |
|------------------------------|-------------------------------------------------------------------------------------------------------------------------------------------------------------------------------------------------------------|
| Dose Levels (Groups)         | All groups,                                                                                                                                                                                                 |
| Collection Intervals         | Days 1, 14 and 28                                                                                                                                                                                           |
| Collection Time Points       | Days 1 and 14: Predose, 30 minutes, 1, 2, 4, 8 and 24h after dosing (all animals).<br>Day 28: Predose, 30 minutes, 1, 2, 4, 8, 24 (all animals), 48 and 72h after dosing (recovery animals)                 |
| Animals/Time Point           | See above                                                                                                                                                                                                   |
| Anesthesia                   | Not required                                                                                                                                                                                                |
| Collection Volume per Sample | About 1 mL of blood/point.                                                                                                                                                                                  |
| Collection Site              | Peripheral veins (alternate sites may be used if necessary)                                                                                                                                                 |
| Sample Requirements          | Blood was put in heparinized plastic tubes kept on a ice-water bath, then centrifuged (10 min, 1200g, +4°C). Two aliquots of about 200 µL each of plasma were stored in a freezer at – 80°C until analysis. |



After blood collection, frozen plasma specimens were transferred in plastic boxes to DMPK & ART, Nerviano Medical Sciences. The samples were loaded according to Watson 6.4.0.04 (Thermo Fisher Scientific Waltham, MA, USA).

Plasma samples were analyzed for the quantitation of fexinidazole using a validated LC-MS-MS method by Bioanalysis/Analytical Control, DMPK & ART.

Toxicokinetic calculations were carried out by Pharmacokinetics, DMPK & ART.

The toxicokinetic report is appended to the present report as Appendix 13.

Details of the analytical method and of calculation methods are included in the toxicokinetic report.

## 7. DATA ACQUISITION

Clinical observations, body weights, food consumptions, ECG and ophthalmoscopic examination data, organ weights, gross necropsy observations, histopathologic findings and dose administration documentation were entered directly into the Xybio Path/Tox System or were recorded on appropriate paper forms, and, if appropriate, later entered into the Xybio Path/Tox System. Clinical pathology data were processed according to Clinical Pathology Laboratories procedures.

The limits of a scheduled period were fixed by the “grace days” reported for scheduled determinations.

## 8. STATISTICAL ANALYSIS

### 8.1. Variables

Body weights, clinical chemistry, hematology, ECG data, absolute organ weights, urinalysis (volume and specific gravity only) were statistically analysed.

### 8.2. Methods

Dunnett’s test, included in a customized Xybio package, was used.

## 9. ARCHIVING

The original protocol, the protocol amendment, all raw data, supporting documents, and specimens produced at the Test Facility, and the final report with original signatures were filed in the Archives of Accelera, Nerviano Medical Sciences S.r.l., Nerviano (Italy) for the period of time agreed with the Sponsor (at least 3years) after which the Sponsor will be contacted for instructions regarding dispatch or disposal of the material.

A copy of the protocol, the report with original signatures, a reserve sample and all relevant original documentation of the test item were filed by the Sponsor.

## 10. STUDY DEVIATIONS

1) Report No. 0293-2007-R, mentioned in Paragraph 6.1.4.1 of the protocol. (Homogeneity and Concentration) concerning validation of the analysis method for quantification of fexinidazole, was finalized after start of the study.

2) Only plasma samples taken at 0 and 2h from control animals were analyzed for the presence of Fexinidazole and its metabolites, at variance with Amendment 1 (0505-2007-PA1).

## 11. STUDY PERSONNEL

|  |  |
|--|--|
|  |  |
|  |  |
|  |  |
|  |  |
|  |  |
|  |  |
|  |  |
|  |  |
|  |  |
|  |  |
|  |  |
|  |  |
|  |  |
|  |  |
|  |  |

## 12. RESULTS

### 12.1. Clinical and Physical Examination

#### 12.1.1. Mortality

No mortality was observed during the study.

#### 12.1.2. Clinical Signs

(Table 1, Appendix 2)

No treatment-related clinical signs were observed during the study.

The gastrointestinal disturbances observed (soft stools and/or diarrhea) were considered unrelated to the treatment since they were sporadic, present also during the pretest period and occurring with a similar incidence and severity in control and treated animals.

#### 12.1.3. Body Weight

(Table 2 , Appendix 3, Figure 16.1)

Slight to moderate, progressive body weight loss was observed in one male given 200 mg/kg/day (No. 2523, -10% on Day 28 vs Day 1) and, in the high-dose group, in two males (Nos 2517 and 2530; -10 to -14%) and four females (all except No. 2569; -8 to -15%). A trend towards recovery was observed after the end of the treatment period in female No. 2571 only. Changes in body weight correlated with the decrease in food consumption (see below) in females only.

#### 12.1.4. Food consumption

(Table 1, Appendix 2)

No significant changes in food intake were observed in treated males at any dose. A slight to moderate reduction in food intake was repeatedly observed from Day 2 on, throughout the treatment period, in the same four females given 800 mg/kg/day that showed body weight loss. Female No. 2569 showed only sporadic episodes of slight reduction in food intake. The two females chosen for recovery showed normal food intake after the treatment was discontinued.

#### 12.1.5. Electrocardiographic examination

(Table 3, Appendix 4)

No abnormalities in rhythm and morphology were recorded in any animal.

No meaningful abnormal values were observed in any measured or computed parameters including repolarization parameters, namely QT or QTc interval corrected for heart rate using the Fridericia's formula ( $QT/RR^{1/3}$ ).

The changes observed when the various groups were compared with the control group were not considered to be toxicologically meaningful despite the statistical significance of some differences.

The variations observed in comparison with the pretest values (see table below for mean variations of main parameters) showed no meaningful changes or changes similar to those observed in control animals.

**Main ECG parameters - Differences in comparison with pretest – Mean values**

|                           |                | Males     |           |           |           | Females   |            |           |            |
|---------------------------|----------------|-----------|-----------|-----------|-----------|-----------|------------|-----------|------------|
|                           |                | control   | grp2      | grp3      | grp4      | control   | grp2       | grp3      | grp4       |
| <b>Heart rate</b><br>bpm  | <b>pretest</b> | <b>93</b> | <b>82</b> | <b>81</b> | <b>95</b> | <b>95</b> | <b>116</b> | <b>93</b> | <b>102</b> |
|                           | Day 24         | 2         | 20        | 16        | 5         | 4         | -8         | 19        | 8          |
|                           | Day 38         | -10       |           |           | -4        | 6         |            |           | 0          |
| <b>P-R interval</b><br>ms | <b>pretest</b> | <b>87</b> | <b>89</b> | <b>97</b> | <b>86</b> | <b>88</b> | <b>83</b>  | <b>92</b> | <b>87</b>  |
|                           | Day 24         | -6        | -7        | -7        | 0         | -5        | 6          | -5        | -1         |
|                           | Day 38         | 0         |           |           | 15        | 14        |            |           | 3          |

|                                                       |                |            |            |            |            |            |            |            |            |
|-------------------------------------------------------|----------------|------------|------------|------------|------------|------------|------------|------------|------------|
| <b>QRS complex duration</b><br>ms                     | <b>pretest</b> | <b>47</b>  | <b>46</b>  | <b>55</b>  | <b>44</b>  | <b>46</b>  | <b>51</b>  | <b>49</b>  | <b>50</b>  |
|                                                       | Day 24         | 0          | -1         | -2         | 0          | 2          | -3         | 4          | 3          |
|                                                       | Day 38         | 4          |            |            | 7          | 5          |            |            | -1         |
| <b>Q-T interval</b><br>ms                             | <b>pretest</b> | <b>179</b> | <b>186</b> | <b>190</b> | <b>179</b> | <b>185</b> | <b>180</b> | <b>183</b> | <b>177</b> |
|                                                       | Day 24         | 10         | 1          | 6          | 18         | 1          | 4          | 9          | 15         |
|                                                       | Day 38         | 20         |            |            | 24         | 9          |            |            | 27         |
| <b>Q-Tc interval</b><br>(QT/RR <sup>1/3</sup> )<br>ms | <b>pretest</b> | <b>208</b> | <b>204</b> | <b>209</b> | <b>207</b> | <b>214</b> | <b>224</b> | <b>210</b> | <b>211</b> |
|                                                       | Day 24         | 11         | 15         | 18         | 26         | 4          | 0          | 25         | 20         |
|                                                       | Day 38         | 14         |            |            | 23         | 14         |            |            | 30         |

bpm = beats per minute; ms = milliseconds. Pretest data are reported as absolute values.

Other values or notes reported in the tables or appendices were deemed to be spontaneous because one or more of the following conditions apply: they were present at the pre-test examinations, without any dose and/or time relationship and, in our experience, are those commonly occurring under the experimental conditions or are well-known normal features of the dog heart rhythm such as respiratory sinus arrhythmia.

### 12.1.6. Ophthalmoscopic examination

(Table 4, Appendix 5)

No treatment-related changes were noted during the study.

The only alteration recorded (female dog No. 2575, small areas of corneal opacity in the right eye at the end of the treatment and recovery period) was unilateral and involved a control animal.

## 12.2. Clinical pathology

### 12.2.1. Hematology

(Table 5, Appendix 6)

No clear treatment-related changes were recorded during the study.

On Day 28 a minimal to slight (about 25%) variable decrease in lymphocytes was recorded in males dosed at 200 and 800 mg/kg/day. The same parameter showed a minimal (9 to 16%) variable decrease in all dosed females without dose-relationship. Recovery occurred on Day 42 in high-dose animals. In other groups recovery could not be ascertained. Neutrophils were slightly (about 20%) decreased in males dosed at 200 mg/kg/day. Recovery could not be ascertained.

### 12.2.2. Coagulation

(Table 6, Appendix 7)

No treatment-related changes were recorded during the study.

### 12.2.3. Clinical chemistry

(Table 7, Appendix 8)

No clear treatment-related changes were recorded during the study.

On Day 28, a minimal (about 2-fold) increase in alkaline phosphatase was observed in high-dose male No. 2525. Recovery could not be ascertained.

A minimal (about 1.5-fold) increase in total cholesterol was recorded in high-dose female No. 2564 at the end of the treatment period. Recovery could not be ascertained.

In male No. 2528 given the high dose gamma-glutamyl transferase was minimally (about 1.4-fold) increased starting from Day 28 up to Day 42.

### 12.2.4. Urinalysis

(Tables 8 and 9, Appendix 9)

No treatment-related changes were recorded during the study.

## 12.3. Post-mortem examinations

### 12.3.1. Organ Weights

(Tables 10 and 11, Appendices 10 and 11)

#### **End of treatment (Days 29-30)**

The increases in mean absolute and relative weights of the ovaries observed in treated animals, without dose-relationship, are considered of doubtful toxicological significance and are further discussed in the histopathology section.

Other variations in mean weights, sometimes noted in treated animals, reflect the remarkable individual variability observed also in controls.

#### **Final Phase Sacrifice (Day 43)**

The changes observed in mean absolute and relative organ weights were not considered toxicologically significant due to the low number of animals available for evaluation and to individual variability.

### 12.3.2. Gross Pathology

(Table 12, Appendix 12)

#### **End of treatment (Days 29-30)**

Fairly good general condition, clear liquid content in the peritoneal cavity or small thymus were occasionally observed in treated animals as well as in controls.

A generalized increase in size of lymph nodes was noted in male No. 2523, receiving 200 mg/kg/day of the test compound.

#### **Final Phase Sacrifice (Day 43)**

Fairly good general condition was noted in one male treated with 800 mg/kg/day (No. 2530). Small prostate was noted in the same animal as well as in one control male (No. 2533).

### 12.3.3. Histopathology

(Table 13, Appendix 12)

#### End of treatment (Days 29-30)

Changes considered as indirectly related to treatment with the test compound were observed in the hematopoietic system.

Moderately reduced cellularity of the bone marrow and severe involution of the thymus were noted in a high dose male (No. 2517), accompanied by atrophy of the adipose tissue with grades ranging from slight to moderate in the sternal and femoral marrow spaces and in the fat deposits adjacent to the renal pelvis. Minimally reduced cellularity was also noted in the bone marrow of one male treated with 200 mg/kg/day (No. 2523). The changes observed in the bone marrow in both animals, and in the thymus and adipose tissue in the high-dose male were interpreted as a consequence of body weight loss.

#### Final Phase Sacrifice (Day 43)

No clear treatment related changes were noted in the hematopoietic system of high-dose animals at the end of the recovery period. The increased severity of involution noted in the thymus of both sexes compared with controls was considered related to body weight loss.

Additional changes of doubtful toxicological significance were noted as follows.

At the end of treatment period, corpora lutea were observed in all females at 200 and 800 mg/kg/day dose levels and in two out of three females treated with 50 mg/kg/day (Table 14). The situation of the stage of estrus of female animals is summarized in Table 15. The stage of estrus was assessed on the base of the comprehensive microscopic appearance of ovaries, uterus and vagina [5]. All three control animals sacrificed at the end of the treatment were immature. On the contrary, the majority of the treated animals sacrificed at the same timepoint were in diestrus, while one low dose was in estrus and one was in metestrus. The significance of this finding is discussed later (see 13.Discussion).

## 12.4. Systemic Exposure Evaluation

(Appendix 13)

### Day 1

Mean  $\pm$ SD systemic exposure to Fexinidazole is reported in the following table

| Dose<br>mg/kg | Male                      |                          |                                         | Female                    |                          |                                         |
|---------------|---------------------------|--------------------------|-----------------------------------------|---------------------------|--------------------------|-----------------------------------------|
|               | C <sub>max</sub><br>ng/mL | t <sub>max</sub><br>hour | AUC <sub>0-t</sub> (last)<br>ng·hour/mL | C <sub>max</sub><br>ng/mL | t <sub>max</sub><br>hour | AUC <sub>0-t</sub> (last)<br>ng·hour/mL |
| 50 (n=3)      | 31.2 $\pm$ 12.4           | 0.5 $\pm$ 0              | 140 $\pm$ 147                           | 42.4 $\pm$ 10.6           | 1 $\pm$ 0.87             | 237 $\pm$ 105                           |
| 200 (n=3)     | 54.9 $\pm$ 10.8           | 1 $\pm$ 0.87             | 419 $\pm$ 61.4                          | 84.1 $\pm$ 36.7           | 1 $\pm$ 0                | 454 $\pm$ 119                           |
| 800 (n=5)     | 100 $\pm$ 21.2            | 1.1 $\pm$ 0.55           | 776 $\pm$ 182                           | 184 $\pm$ 75.6            | 1.2 $\pm$ 0.45           | 895 $\pm$ 437                           |

At each dose, no relevant gender difference was observed in terms of  $C_{max}$  and  $AUC_{0-t(last)}$  values. The maximal plasma concentrations of fexinidazole were promptly achieved, on average at 1 hour post dosing.  $AUC_{0-t(last)}$  values of fexinidazole increased with the dose

Mean  $\pm$ SD systemic exposure to the sulfone metabolite is reported in the following table

| Dose<br>mg/kg | Male                    |                   |                                      | Female                  |                   |                                      |
|---------------|-------------------------|-------------------|--------------------------------------|-------------------------|-------------------|--------------------------------------|
|               | $C_{max}$<br>$\mu$ g/mL | $t_{max}$<br>Hour | $AUC_{0-t(last)}$<br>$\mu$ g·hour/mL | $C_{max}$<br>$\mu$ g/mL | $t_{max}$<br>hour | $AUC_{0-t(last)}$<br>$\mu$ g·hour/mL |
| 50 (n=3)      | 7.17 $\pm$ 1.74         | 8 $\pm$ 0         | 126 $\pm$ 28.1                       | 10 $\pm$ 1.6            | 6.67 $\pm$ 2.31   | 170 $\pm$ 37.8                       |
| 200 (n=3)     | 17.2 $\pm$ 1.69         | 13.3 $\pm$ 9.24   | 338 $\pm$ 50.8                       | 18.1 $\pm$ 3.42         | 12 $\pm$ 10.6     | 358 $\pm$ 85.7                       |
| 800 (n=5)     | 38.6 $\pm$ 2.83         | 17.6 $\pm$ 8.76   | 705 $\pm$ 94.9                       | 33.6 $\pm$ 10.9         | 11.2 $\pm$ 7.16   | 614 $\pm$ 216                        |

At each dose, the levels of the metabolite were similar in males and females.  $T_{max}$  values of the metabolite were achieved later than for the parent compound. The systemic exposure to the metabolite increased with the dose.

The systemic exposure to the sulfone metabolite was definitely higher than that to the parent compound.

Mean  $\pm$ SD systemic exposure to the sulfoxide metabolite is reported in the following table

| Dose<br>mg/kg | Male                    |                   |                                      | Female                  |                   |                                      |
|---------------|-------------------------|-------------------|--------------------------------------|-------------------------|-------------------|--------------------------------------|
|               | $C_{max}$<br>$\mu$ g/mL | $t_{max}$<br>hour | $AUC_{0-t(last)}$<br>$\mu$ g·hour/mL | $C_{max}$<br>$\mu$ g/mL | $t_{max}$<br>hour | $AUC_{0-t(last)}$<br>$\mu$ g·hour/mL |
| 50 (n=3)      | 3.55 $\pm$ 1.3          | 1 $\pm$ 0         | 19.2 $\pm$ 5.82                      | 3.97 $\pm$ 0.74         | 1.33 $\pm$ 0.58   | 20 $\pm$ 6.81                        |
| 200 (n=3)     | 7.55 $\pm$ 1.03         | 1.67 $\pm$ 0.58   | 50.7 $\pm$ 8.61                      | 8.7 $\pm$ 3.95          | 0.83 $\pm$ 0.29   | 52.1 $\pm$ 20.6                      |
| 800 (n=5)     | 13.4 $\pm$ 3.22         | 1.5 $\pm$ 0.71    | 104 $\pm$ 11.3                       | 15.6 $\pm$ 4.64         | 1.6 $\pm$ 0.55    | 121 $\pm$ 44.4                       |

At each dose, the levels of the metabolite were similar in males and females. The maximal plasma concentrations of the sulfoxide metabolite were rapidly achieved, on average 1 - 2 hours post dosing.

The systemic exposure to the metabolite increased with the dose (Figures 26 - 27).

The systemic exposure to the metabolite was definitely higher than that to the parent compound.

#### Repeated dosing

Day 14 and Day 28 mean  $\pm$ SD systemic exposure to fexinidazole is reported in the following table

| Dose<br>mg/kg/day | Male               |                   |                                 | Female             |                   |                                 |
|-------------------|--------------------|-------------------|---------------------------------|--------------------|-------------------|---------------------------------|
|                   | $C_{max}$<br>ng/mL | $t_{max}$<br>hour | $AUC_{0-t(last)}$<br>ng·hour/mL | $C_{max}$<br>ng/mL | $t_{max}$<br>hour | $AUC_{0-t(last)}$<br>ng·hour/mL |
|                   | Day 14             |                   |                                 |                    |                   |                                 |
| 50 (n=3)          | 26.5 $\pm$ 13      | 0.5 $\pm$ 0       | 52.1 $\pm$ 29.4                 | 41.9 $\pm$ 2.2     | 1.67 $\pm$ 0.58   | 246 $\pm$ 117                   |
| 200 (n=3)         | 78.1 $\pm$ 23.5    | 1 $\pm$ 0.87      | 452 $\pm$ 41.1                  | 77.7 $\pm$ 50.8    | 2 $\pm$ 0         | 443 $\pm$ 217                   |
| 800 (n=5)         | 128 $\pm$ 56.9     | 1 $\pm$ 0         | 929 $\pm$ 268                   | 152 $\pm$ 44       | 1.4 $\pm$ 0.55    | 1170 $\pm$ 309                  |
|                   | Day 28             |                   |                                 |                    |                   |                                 |
| 50 (n=3)          | 20.3 $\pm$ 7.89    | 1 $\pm$ 0         | 124 $\pm$ 67                    | 36.3 $\pm$ 15.1    | 1 $\pm$ 0         | 87.1 $\pm$ 38.1                 |
| 200 (n=3)         | 57.9 $\pm$ 12.5    | 1 $\pm$ 0         | 395 $\pm$ 15.8                  | 73 $\pm$ 12        | 1 $\pm$ 0         | 377 $\pm$ 83.5                  |
| 800 (n=5)         | 86.2 $\pm$ 38.5    | 1.2 $\pm$ 0.4     | 736 $\pm$ 141                   | 101 $\pm$ 47.1     | 1 $\pm$ 0         | 956 $\pm$ 378                   |

At each dose, the levels of fexinidazole were similar in both genders after administration on Day 14 and Day 28. The maximal plasma concentrations of fexinidazole were achieved, on average, 1 - 2 hours post dosing. The systemic exposure to fexinidazole increased with the dose (Figures 22 - 23).  $C_{max}$  and  $AUC_{0-t(last)}$  accumulation ratios were about 1.

Day 14 and Day 28 mean  $\pm$ SD systemic exposure to the sulfone metabolite is reported in the following table

| Dose<br>mg/kg/day                                       | Male                    |                   |                                      | Female                  |                   |                                      |
|---------------------------------------------------------|-------------------------|-------------------|--------------------------------------|-------------------------|-------------------|--------------------------------------|
|                                                         | $C_{max}$<br>$\mu$ g/mL | $t_{max}$<br>hour | $AUC_{0-t(last)}$<br>$\mu$ g·hour/mL | $C_{max}$<br>$\mu$ g/mL | $t_{max}$<br>hour | $AUC_{0-t(last)}$<br>$\mu$ g·hour/mL |
|                                                         | Day 14                  |                   |                                      |                         |                   |                                      |
| 50 (n=3)                                                | 5.57 $\pm$ 2.19         | 4 $\pm$ 0         | 78 $\pm$ 35.3                        | 9.98 $\pm$ 1.25         | 6.67 $\pm$ 2.31   | 173 $\pm$ 26.9                       |
| 200 (n=3)                                               | 22 $\pm$ 5.59           | 5.33 $\pm$ 2.31   | 387 $\pm$ 49.5                       | 21.5 $\pm$ 2.42         | 5.33 $\pm$ 2.31   | 381 $\pm$ 61.2                       |
| 800 (n=5)                                               | 34.6 $\pm$ 7.42         | 5.6 $\pm$ 2.19    | 640 $\pm$ 163                        | 38.6 $\pm$ 4.73         | 8 $\pm$ 0         | 667 $\pm$ 67.8                       |
|                                                         | Day 28                  |                   |                                      |                         |                   |                                      |
| 50 (n=3)                                                | 7.11 $\pm$ 1.21         | 8 $\pm$ 0         | 121 $\pm$ 19.1                       | 6.79 $\pm$ 0.56         | 3.33 $\pm$ 1.15   | 107 $\pm$ 22.5                       |
| 200 (n=3)                                               | 14 $\pm$ 3.31           | 4 $\pm$ 4         | 258 $\pm$ 48                         | 15.4 $\pm$ 2.66         | 11.7 $\pm$ 10.1   | 277 $\pm$ 29.9                       |
| 800 (n=5)                                               | 20.8 $\pm$ 4.14         | 12.4 $\pm$ 9.81   | 388 $\pm$ 68.2 <sup>(1)</sup>        | 26 $\pm$ 7.7            | 7.2 $\pm$ 1.79    | 477 $\pm$ 145 <sup>(1)</sup>         |
|                                                         |                         |                   | 601 $\pm$ 29 <sup>(2)</sup>          |                         |                   | 693 $\pm$ 351 <sup>(2)</sup>         |
| <sup>(1)</sup> AUC <sub>0-24</sub> ; <sup>(2)</sup> n=2 |                         |                   |                                      |                         |                   |                                      |

At each dose, the levels of the metabolite were similar in both genders.  $T_{max}$  values of the metabolite were achieved later than for the parent compound. On Day 28 after 800 mg/kg/day, mean  $\pm$ SD apparent terminal half-lives were 6.7  $\pm$ 0.7 and 7.8  $\pm$ 0.7 (n=2) hours in males and females, respectively. After the three doses, systemic exposure to the metabolite increased with the dose (Figures 24 - 25). Accumulation ratios, in terms of both  $C_{max}$  and  $AUC_{0-t(last)}$ , were about 1.

The systemic exposure to the metabolite was remarkably higher than that to the parent compound.

Day 14 and Day 28 mean  $\pm$ SD systemic exposure to the sulfoxide metabolite is reported in the following table

| Dose<br>mg/kg/day                                       | Male                    |                   |                                      | Female                  |                   |                                      |
|---------------------------------------------------------|-------------------------|-------------------|--------------------------------------|-------------------------|-------------------|--------------------------------------|
|                                                         | $C_{max}$<br>$\mu$ g/mL | $t_{max}$<br>hour | $AUC_{0-t(last)}$<br>$\mu$ g·hour/mL | $C_{max}$<br>$\mu$ g/mL | $t_{max}$<br>hour | $AUC_{0-t(last)}$<br>$\mu$ g·hour/mL |
|                                                         | Day 14                  |                   |                                      |                         |                   |                                      |
| 50 (n=3)                                                | 2.24 $\pm$ 0.45         | 1 $\pm$ 0         | 8.51 $\pm$ 2.53                      | 3.73 $\pm$ 0.73         | 1.67 $\pm$ 0.58   | 18.8 $\pm$ 2.06                      |
| 200 (n=3)                                               | 8.96 $\pm$ 2.53         | 2 $\pm$ 0         | 56.1 $\pm$ 9.96                      | 9.02 $\pm$ 3.69         | 2 $\pm$ 0         | 57.2 $\pm$ 24.3                      |
| 800 (n=5)                                               | 12.5 $\pm$ 2.85         | 1.2 $\pm$ 0.45    | 113 $\pm$ 39.9                       | 14.8 $\pm$ 5.1          | 2 $\pm$ 1.22      | 144 $\pm$ 37.1                       |
|                                                         | Day 28                  |                   |                                      |                         |                   |                                      |
| 50 (n=3)                                                | 1.83 $\pm$ 0.57         | 1.67 $\pm$ 0.58   | 14.2 $\pm$ 2.72                      | 2.72 $\pm$ 0.73         | 1 $\pm$ 0         | 9.88 $\pm$ 2.72                      |
| 200 (n=3)                                               | 5.76 $\pm$ 1.17         | 1.33 $\pm$ 0.58   | 42.2 $\pm$ 6.46                      | 5.43 $\pm$ 0.34         | 1 $\pm$ 0         | 33.8 $\pm$ 1.65                      |
| 800 (n=5)                                               | 9.35 $\pm$ 3.55         | 1.6 $\pm$ 0.55    | 74.3 $\pm$ 14.4 <sup>(1)</sup>       | 9.48 $\pm$ 3.38         | 1.4 $\pm$ 0.55    | 89 $\pm$ 45.2                        |
|                                                         |                         |                   | 121 $\pm$ 33 <sup>(2)</sup>          |                         |                   |                                      |
| <sup>(1)</sup> AUC <sub>0-24</sub> ; <sup>(2)</sup> n=2 |                         |                   |                                      |                         |                   |                                      |

At each dose, the levels of the metabolite were similar in both genders. The maximal plasma concentrations of the sulfoxide metabolite were promptly achieved, on average, 1 - 2 hours



post dosing. On Day 28 after 800 mg/kg/day, mean  $\pm$ SD apparent terminal half-lives were  $9.4 \pm 5.4$  (n=2) hours in males. After the three doses, the systemic exposure to the metabolite increased with the dose (Figures 26 - 27). Accumulation ratios, in terms of both  $C_{max}$  and  $AUC_{0-t(last)}$ , were about 1.

The systemic exposure to the metabolite was remarkably higher than that to the parent compound.

### 13. DISCUSSION

Fexinidazole was given daily for twenty-eight days to five (control and high dose) or three (low and mid dose) beagle dogs/sex/dose at the doses of 0 (control group), 50, 200 and 800 mg/kg/day. The compound was administered orally, by gavage, as a suspension in 5% Tween 80 / 0.5% Methocel in a volume of 10 mL/kg/day. The control group received the vehicle alone (5% Tween 80 in 0.5% Methocel).

No drug-related changes were observed at electrocardiographic and ophthalmoscopic examination.

No mortality and no drug-related clinical signs were observed.

Slight to moderate, progressive body weight loss was observed in a few males and in the majority of females given 800 mg/kg/day. A slight to moderate reduction in food intake was seen during the treatment period in the same females given 800 mg/kg/day that showed body weight loss, with normalization during the recovery period.

Similar effects on body weight and food consumption were observed in a previous repeated dose toxicity study in the dog with this same compound [2], [3].

A minimal to slight decrease in lymphocytes was observed mainly at the high dose in both sexes. Other changes observed at hematology and clinical chemistry were not dose-related or present only in single instances and thus considered of no toxicological relevance.

No clear cut treatment-related histological changes were identified in animals treated with the test compound when compared with controls.

The minimally to moderately reduced cellularity in the bone marrow observed in one male treated with 200 mg/kg/day and in one high dose male (No. 2517), and the severe involution of the thymus observed in the high dose male were considered as changes secondary to body weight loss, which was more prominent in this last male with respect to other males given the same dose. This interpretation would be further supported by the occurrence of atrophy of the adipose tissue, noted in the animal treated with the high dose, both in the marrow spaces of the sternum and femur [4] and in the fat deposits adjacent to the renal pelvis.

At the end of treatment period, corpora lutea were observed in all females at 200 and 800 mg/kg/day dose levels and in two out of three females treated with 50 mg/kg/day, while they were not present in the ovaries of control females, correlating with the increase in absolute and relative weight of the ovaries and with the differences in the stage of estrus noted in treated animals compared to controls.

The odd distribution of the stage of estrus within the groups, in animals with a quite homogeneous age at the time of necropsy (about 9.5 month), could suggest an effect of the test compound in terms of induction of estrus in treated animals, independently from the dose administered. Nevertheless, the two control animals sacrificed after recovery were both in diestrus and thus already cycling (i.e., mature) two weeks before, at the time of the end-of-treatment sacrifice, thus re-equilibrating the distribution of estrus stage with the treated groups at that time.

On the base of these considerations, the distribution observed in animals at the end of treatment is considered most likely due to the incidental occurrence of immature animals only in the control group and there is not a clear influence of the test compound on the stage of estrus of the animals in the study.

After single and repeated administrations at the three dose levels, no relevant gender difference in the systemic exposure to fexinidazole was observed. AUCs of fexinidazole increased less than expected assuming dose proportionality in the dose range investigated. No accumulation of fexinidazole was observed.

Fexinidazole was extensively metabolized to the sulfone and sulfoxide derivatives after both single and repeated administration. No accumulation of either metabolite was observed.

## 14. CONCLUSIONS

Fexinidazole, given orally to beagle dogs at the doses of 50, 200 and 800 mg/kg/day for 28 consecutive days, was well tolerated.

Slight to moderate body weight loss and reduction in food intake was observed at the dose of 800 mg/kg/day during the treatment period.

A minimal to slight decrease in lymphocytes was seen at the high dose.

Fexinidazole was extensively metabolized to the sulfone and sulfoxide derivatives both after single and repeated administration.

In the condition applied in the present study, the dose of 200 mg/kg/day can be considered as the NOEL.

## 15. REFERENCES

1. Fexinidazole: Validation of an Analytical Method for the Assay of Fexinidazole in 0.5% methocel containing 5% v/v of Tween 80 by HPLC-UV. Nerviano Medical Sciences, Study No. 0293-2007, report in progress.
2. Fexinidazole: Seven-Day Oral Toxicity Study in the Dog, (DRF - phased study) Nerviano Medical Sciences Study Report No. 0338-2007-R, March 18, 2008.
3. Tolerance testing of HOE 239 (= S 75 1239) after repeated oral administration to beagle dogs: 90-day tolerance study, Hoechst Document No. 1977.1239, February 4, 1977
4. Travlos GS (2006). Histopathology of Bone Marrow. *Toxicol Pathol* 34: 566-598.

5. Rehm S, Stanislaus DJ, Williams AM (2007). Estrous cycle-dependent histology and review of sex steroid receptor expression in dog reproductive tissues and mammary gland and associated hormone levels. *Birth Defects Res B Dev Reprod Toxicol* 80: 233-245.

## 16. FIGURES

### 16.1. Body weight

(during treatment period)

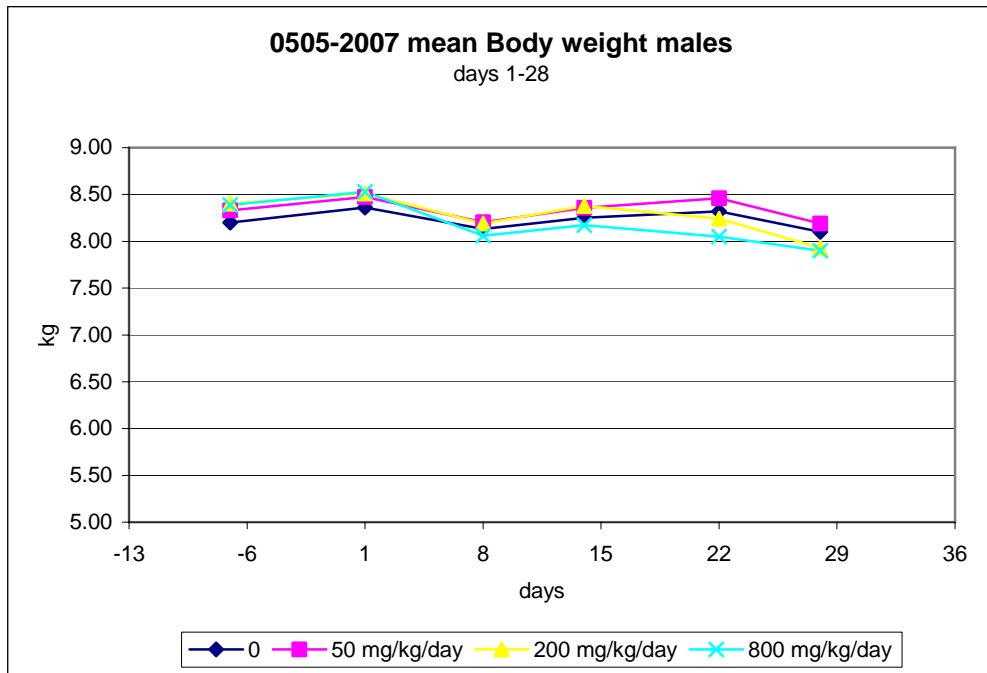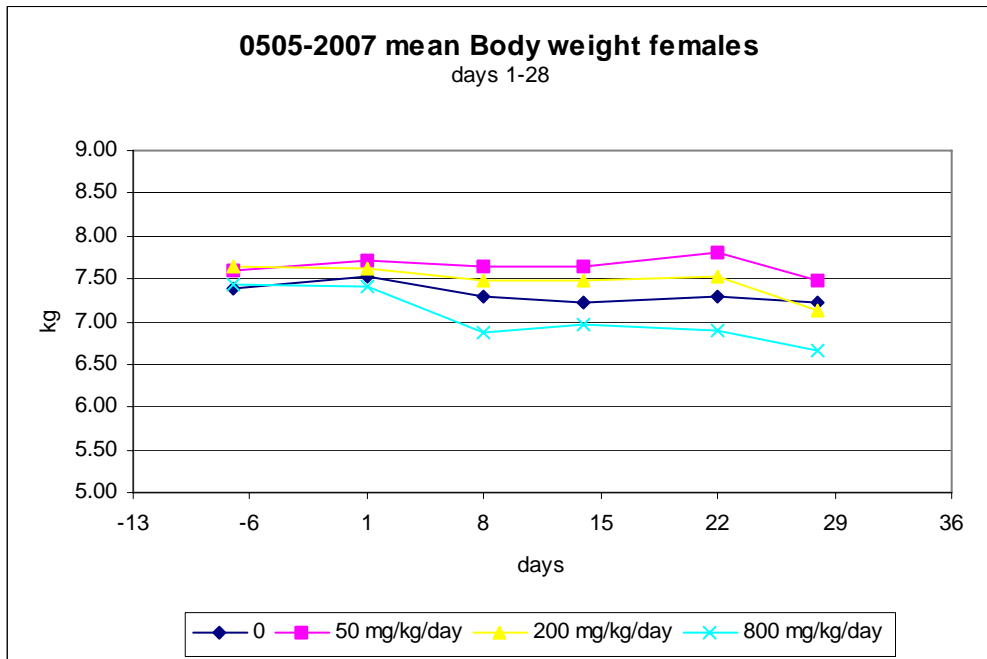

## **TABLES**

***Table 1 Clinical Signs***

CONFIDENTIAL

Table 1  
Group Incidence of Clinical Signs

Study Number: 0505-2007

Fexinidazole

| Study Days -8--1            | Group Number<br>Number of Animals <sup>+</sup> | M a l e s            |       |                       |       |                       |       |   |       |
|-----------------------------|------------------------------------------------|----------------------|-------|-----------------------|-------|-----------------------|-------|---|-------|
|                             |                                                | 1                    |       | 2                     |       | 3                     |       | 4 |       |
|                             |                                                | 5                    |       | 3                     |       | 3                     |       | 5 |       |
|                             |                                                | a                    | (b)   | a                     | (b)   | a                     | (b)   | a | (b)   |
| Normal                      |                                                |                      |       |                       |       |                       |       |   |       |
|                             | NORMAL/NO SIGNIFICANT SIGNS                    | 5                    | (6.6) | 3                     | (7.3) | 3                     | (6.7) | 5 | (7.4) |
| GASTRO-INTESTINAL FUNCTIONS |                                                |                      |       |                       |       |                       |       |   |       |
|                             | DIARRHEA                                       | 1                    | (2.0) | 0                     | (0.0) | 0                     | (0.0) | 0 | (0.0) |
|                             | SOFT STOOL                                     | 4                    | (1.3) | 1                     | (2.0) | 3                     | (1.3) | 2 | (1.5) |
| Group 1:Vehicle             |                                                | Group 2:50 mg/kg/day |       | Group 3:200 mg/kg/day |       | Group 4:800 mg/kg/day |       |   |       |

Key: + = Number of animals alive at start of interval  
a = Number of animals affected  
(b) = Mean number of animal days that the group displayed the sign

CONFIDENTIAL

Table 1  
Group Incidence of Clinical Signs

Study Number: 0505-2007

Fexinidazole

| Study Days -8--1            | Group Number<br>Number of Animals <sup>+</sup> | F e m a l e s         |       |                       |       |   |       |   |       |
|-----------------------------|------------------------------------------------|-----------------------|-------|-----------------------|-------|---|-------|---|-------|
|                             |                                                | 1                     |       | 2                     |       | 3 |       | 4 |       |
|                             |                                                | 5                     | 3     | 3                     | 5     |   |       |   |       |
|                             |                                                | a                     | (b)   | a                     | (b)   | a | (b)   | a | (b)   |
| Normal                      |                                                |                       |       |                       |       |   |       |   |       |
| NORMAL/NO SIGNIFICANT SIGNS |                                                | 5                     | (7.8) | 3                     | (7.3) | 3 | (6.7) | 5 | (7.6) |
| GASTRO-INTESTINAL FUNCTIONS |                                                |                       |       |                       |       |   |       |   |       |
| SOFT STOOL                  |                                                | 1                     | (1.0) | 1                     | (2.0) | 2 | (2.0) | 1 | (1.0) |
| FOOD/WATER INTAKE           |                                                |                       |       |                       |       |   |       |   |       |
| REDUCED FOOD INTAKE         |                                                | 0                     | (0.0) | 0                     | (0.0) | 0 | (0.0) | 1 | (1.0) |
| Group 1:Vehicle             | Group 2:50 mg/kg/day                           | Group 3:200 mg/kg/day |       | Group 4:800 mg/kg/day |       |   |       |   |       |

Key: + = Number of animals alive at start of interval  
a = Number of animals affected  
(b) = Mean number of animal days that the group displayed the sign



CONFIDENTIAL

Table 1  
Group Incidence of Clinical Signs

Study Number: 0505-2007

Fexinidazole

| Study Days 1-30             | Group Number<br>Number of Animals <sup>+</sup> | M a l e s            |        |   |                       |   |        |                       |        |  |
|-----------------------------|------------------------------------------------|----------------------|--------|---|-----------------------|---|--------|-----------------------|--------|--|
|                             |                                                | 1                    |        | 2 |                       | 3 |        | 4                     |        |  |
|                             |                                                | 5                    |        | 3 |                       | 3 |        | 5                     |        |  |
|                             |                                                | a                    | (b)    | a | (b)                   | a | (b)    | a                     | (b)    |  |
| Normal                      |                                                |                      |        |   |                       |   |        |                       |        |  |
|                             | NORMAL/NO SIGNIFICANT SIGNS                    | 5                    | (29.6) | 3 | (29.0)                | 3 | (29.3) | 5                     | (29.6) |  |
| GASTRO-INTESTINAL FUNCTIONS |                                                |                      |        |   |                       |   |        |                       |        |  |
|                             | DIARRHEA                                       | 3                    | (1.7)  | 1 | (5.0)                 | 0 | (0.0)  | 4                     | (1.3)  |  |
|                             | SOFT STOOL                                     | 5                    | (6.4)  | 2 | (6.5)                 | 1 | (3.0)  | 5                     | (4.0)  |  |
| FOOD/WATER INTAKE           |                                                |                      |        |   |                       |   |        |                       |        |  |
|                             | REDUCED FOOD INTAKE                            | 2                    | (1.0)  | 1 | (6.0)                 | 1 | (3.0)  | 1                     | (1.0)  |  |
| Group 1:Vehicle             |                                                | Group 2:50 mg/kg/day |        |   | Group 3:200 mg/kg/day |   |        | Group 4:800 mg/kg/day |        |  |

Key: + = Number of animals alive at start of interval  
a = Number of animals affected  
(b) = Mean number of animal days that the group displayed the sign

CONFIDENTIAL

Table 1  
Group Incidence of Clinical Signs

Study Number: 0505-2007

Fexinidazole

| Study Days 1-30             | Group Number<br>Number of Animals <sup>+</sup> | F e m a l e s        |        |   |                       |   |        |                       |        |  |
|-----------------------------|------------------------------------------------|----------------------|--------|---|-----------------------|---|--------|-----------------------|--------|--|
|                             |                                                | 1                    |        | 2 |                       | 3 |        | 4                     |        |  |
|                             |                                                | 5                    | 3      | 3 | 5                     |   |        |                       |        |  |
|                             |                                                | a                    | (b)    | a | (b)                   | a | (b)    | a                     | (b)    |  |
| Normal                      |                                                |                      |        |   |                       |   |        |                       |        |  |
|                             | NORMAL/NO SIGNIFICANT SIGNS                    | 5                    | (29.6) | 3 | (29.3)                | 3 | (29.3) | 5                     | (29.4) |  |
| GASTRO-INTESTINAL FUNCTIONS |                                                |                      |        |   |                       |   |        |                       |        |  |
|                             | DIARRHEA                                       | 3                    | (2.3)  | 0 | (0.0)                 | 1 | (4.0)  | 2                     | (1.0)  |  |
|                             | EMESIS OF FOOD                                 | 0                    | (0.0)  | 0 | (0.0)                 | 0 | (0.0)  | 1                     | (1.0)  |  |
|                             | SOFT STOOL                                     | 5                    | (2.6)  | 2 | (2.0)                 | 2 | (5.0)  | 3                     | (1.0)  |  |
| FOOD/WATER INTAKE           |                                                |                      |        |   |                       |   |        |                       |        |  |
|                             | REDUCED FOOD INTAKE                            | 1                    | (1.0)  | 1 | (1.0)                 | 2 | (2.5)  | 5                     | (12.8) |  |
| Group 1:Vehicle             |                                                | Group 2:50 mg/kg/day |        |   | Group 3:200 mg/kg/day |   |        | Group 4:800 mg/kg/day |        |  |

Key: + = Number of animals alive at start of interval  
a = Number of animals affected  
(b) = Mean number of animal days that the group displayed the sign

CONFIDENTIAL

Table 1  
Group Incidence of Clinical Signs

Study Number: 0505-2007

Fexinidazole

| Study Days 31-43            | Group Number<br>Number of Animals <sup>+</sup> | M a l e s            |        |                       |       |                       |       |   |        |  |
|-----------------------------|------------------------------------------------|----------------------|--------|-----------------------|-------|-----------------------|-------|---|--------|--|
|                             |                                                | 1                    |        | 2                     |       | 3                     |       | 4 |        |  |
|                             |                                                | 5                    |        | 3                     |       | 3                     |       | 5 |        |  |
|                             |                                                | a                    | (b)    | a                     | (b)   | a                     | (b)   | a | (b)    |  |
| Normal                      |                                                |                      |        |                       |       |                       |       |   |        |  |
|                             | NORMAL/NO SIGNIFICANT SIGNS                    | 2                    | (12.0) | 0                     | (0.0) | 0                     | (0.0) | 2 | (12.5) |  |
| GASTRO-INTESTINAL FUNCTIONS |                                                |                      |        |                       |       |                       |       |   |        |  |
|                             | DIARRHEA                                       | 0                    | (0.0)  | 0                     | (0.0) | 0                     | (0.0) | 1 | (1.0)  |  |
|                             | SOFT STOOL                                     | 2                    | (1.0)  | 0                     | (0.0) | 0                     | (0.0) | 0 | (0.0)  |  |
| Group 1:Vehicle             |                                                | Group 2:50 mg/kg/day |        | Group 3:200 mg/kg/day |       | Group 4:800 mg/kg/day |       |   |        |  |

Key: + = Number of animals alive at start of interval  
a = Number of animals affected  
(b) = Mean number of animal days that the group displayed the sign

CONFIDENTIAL

Table 1  
Group Incidence of Clinical Signs

Study Number: 0505-2007

Fexinidazole

| Study Days 31-43            | Group Number<br>Number of Animals <sup>+</sup> | F e m a l e s         |        |   |       |                       |       |   |        |
|-----------------------------|------------------------------------------------|-----------------------|--------|---|-------|-----------------------|-------|---|--------|
|                             |                                                | 1                     |        | 2 |       | 3                     |       | 4 |        |
|                             |                                                | 5                     |        | 3 |       | 3                     |       | 5 |        |
|                             |                                                | a                     | (b)    | a | (b)   | a                     | (b)   | a | (b)    |
| Normal                      |                                                |                       |        |   |       |                       |       |   |        |
| NORMAL/NO SIGNIFICANT SIGNS |                                                | 2                     | (12.0) | 0 | (0.0) | 0                     | (0.0) | 2 | (12.0) |
| GASTRO-INTESTINAL FUNCTIONS |                                                |                       |        |   |       |                       |       |   |        |
| SOFT STOOL                  |                                                | 2                     | (1.0)  | 0 | (0.0) | 0                     | (0.0) | 2 | (1.0)  |
| Group 1:Vehicle             | Group 2:50 mg/kg/day                           | Group 3:200 mg/kg/day |        |   |       | Group 4:800 mg/kg/day |       |   |        |

Key: + = Number of animals alive at start of interval  
a = Number of animals affected  
(b) = Mean number of animal days that the group displayed the sign

***Table 2 Body Weights***

CONFIDENTIAL

Table 2  
Body Weights (kg)

Fexinidazole

Study Number: 0505-2007

| Group Number | Dose Level    | Study Day | M a l e s |       |       |       |       |       |       |       |   |
|--------------|---------------|-----------|-----------|-------|-------|-------|-------|-------|-------|-------|---|
|              |               |           | -8"       | 1#    | 8     | 14    | 22    | 28    | 35    | 40    |   |
| 1            | Vehicle       | N         | 5         | 5     | 5     | 5     | 5     | 5     | 5     | 2     | 2 |
|              |               | Mean      | 8.20      | 8.36  | 8.14  | 8.25  | 8.32  | 8.10  | 7.58  | 7.71  |   |
|              |               | Sdev      | 0.444     | 0.436 | 0.410 | 0.423 | 0.472 | 0.411 | 0.240 | 0.153 |   |
| 2            | 50 mg/kg/day  | N         | 3         | 3     | 3     | 3     | 3     | 3     | 3     | 0     | 0 |
|              |               | Mean      | 8.33      | 8.47  | 8.20  | 8.36  | 8.46  | 8.19  | -     | -     |   |
|              |               | Sdev      | 1.160     | 1.163 | 1.165 | 1.155 | 1.271 | 1.081 | -     | -     |   |
| 3            | 200 mg/kg/day | N         | 3         | 3     | 3     | 3     | 3     | 3     | 3     | 0     | 0 |
|              |               | Mean      | 8.40      | 8.51  | 8.19  | 8.37  | 8.24  | 7.93  | -     | -     |   |
|              |               | Sdev      | 0.691     | 0.482 | 0.642 | 0.479 | 0.531 | 0.351 | -     | -     |   |
| 4            | 800 mg/kg/day | N         | 5         | 5     | 5     | 5     | 5     | 5     | 5     | 2     | 2 |
|              |               | Mean      | 8.39      | 8.53  | 8.06  | 8.17  | 8.05  | 7.90  | 7.55  | 7.75  |   |
|              |               | Sdev      | 0.734     | 0.954 | 0.993 | 1.049 | 1.010 | 1.117 | 1.131 | 1.039 |   |

Note: " = Pretest phase; # = Test period

CONFIDENTIAL

Table 2  
Body Weights (kg)

Fexinidazole

Study Number: 0505-2007

| Group Number | Dose Level    | Study Day | F e m a l e s |       |       |       |       |       |       |       |
|--------------|---------------|-----------|---------------|-------|-------|-------|-------|-------|-------|-------|
|              |               |           | -8"           | 1#    | 8     | 14    | 22    | 28    | 35    | 40    |
| 1            | Vehicle       | N         | 5             | 5     | 5     | 5     | 5     | 5     | 2     | 2     |
|              |               | Mean      | 7.37          | 7.52  | 7.29  | 7.22  | 7.29  | 7.23  | 8.06  | 8.21  |
|              |               | Sdev      | 0.471         | 0.592 | 0.621 | 0.737 | 0.783 | 1.020 | 0.445 | 0.426 |
| 2            | 50 mg/kg/day  | N         | 3             | 3     | 3     | 3     | 3     | 3     | 0     | 0     |
|              |               | Mean      | 7.60          | 7.70  | 7.65  | 7.63  | 7.80  | 7.49  | -     | -     |
|              |               | Sdev      | 0.674         | 0.872 | 0.762 | 0.847 | 0.784 | 0.803 | -     | -     |
| 3            | 200 mg/kg/day | N         | 3             | 3     | 3     | 3     | 3     | 3     | 0     | 0     |
|              |               | Mean      | 7.65          | 7.63  | 7.48  | 7.48  | 7.52  | 7.13  | -     | -     |
|              |               | Sdev      | 0.960         | 0.807 | 0.808 | 0.862 | 0.770 | 0.809 | -     | -     |
| 4            | 800 mg/kg/day | N         | 5             | 5     | 5     | 5     | 5     | 5     | 2     | 2     |
|              |               | Mean      | 7.42          | 7.41  | 6.87  | 6.96  | 6.90  | 6.65  | 6.81  | 6.95  |
|              |               | Sdev      | 0.391         | 0.546 | 0.670 | 0.671 | 0.677 | 0.659 | 0.601 | 0.592 |

Note: " = Pretest phase; # = Test period

***Table 3 ECG Examinations***



CONFIDENTIAL

Table 3  
Incidence of ECG Rhythm and Morphology Findings

Fexinidazole

Study Number: 0505-2007

| Study Day | Group:                         | M a l e s |   |   |   |
|-----------|--------------------------------|-----------|---|---|---|
|           |                                | 1         | 2 | 3 | 4 |
| -5        |                                |           |   |   |   |
| ECG Notes | /No ECG abnormalities detected | 1         | 0 | 0 | 2 |
|           | /Respiratory Sinus Arrhythmia  | 4         | 3 | 3 | 3 |
| 24        |                                |           |   |   |   |
| ECG Notes | /No ECG abnormalities detected | 1         | 3 | 1 | 2 |
|           | /Respiratory Sinus Arrhythmia  | 4         | 0 | 2 | 3 |
| 38        |                                |           |   |   |   |
| ECG Notes | /No ECG abnormalities detected | 0         | 0 | 0 | 1 |
|           | /Respiratory Sinus Arrhythmia  | 2         | 0 | 0 | 1 |

Group 1:Vehicle

Group 2:50 mg/kg/day

Group 3:200 mg/kg/day

Group 4:800 mg/kg/day

CONFIDENTIAL

Table 3

Incidence of ECG Rhythm and Morphology Findings

Fexinidazole

Study Number: 0505-2007

| Study Day       | Group:                         | F e m a l e s        |   |                       |   |
|-----------------|--------------------------------|----------------------|---|-----------------------|---|
|                 |                                | 1                    | 2 | 3                     | 4 |
| -5              |                                |                      |   |                       |   |
| ECG Notes       | /No ECG abnormalities detected | 2                    | 2 | 0                     | 3 |
|                 | /Respiratory Sinus Arrhythmia  | 3                    | 1 | 3                     | 2 |
| 24              |                                |                      |   |                       |   |
| ECG Notes       | /No ECG abnormalities detected | 1                    | 2 | 0                     | 3 |
|                 | /Respiratory Sinus Arrhythmia  | 4                    | 1 | 3                     | 2 |
| 38              |                                |                      |   |                       |   |
| ECG Notes       | /No ECG abnormalities detected | 2                    | 0 | 0                     | 1 |
|                 | /Respiratory Sinus Arrhythmia  | 0                    | 0 | 0                     | 1 |
| Group 1:Vehicle |                                | Group 2:50 mg/kg/day |   | Group 3:200 mg/kg/day |   |
|                 |                                |                      |   | Group 4:800 mg/kg/day |   |

CONFIDENTIAL

Table 3  
Day -5 ECG Examinations  
Pretest phase

Session 1 (Scheduled)  
Fexinidazole

Study Number: 0505-2007

| Parameter                       | Group Number: | M a l e s            |       |       |                       | F e m a l e s |      |                       |       |  |
|---------------------------------|---------------|----------------------|-------|-------|-----------------------|---------------|------|-----------------------|-------|--|
|                                 |               | 1                    | 2     | 3     | 4                     | 1             | 2    | 3                     | 4     |  |
| Heart rate<br>bpm               | N             | 5                    | 3     | 3     | 5                     | 5             | 3    | 3                     | 5     |  |
|                                 | Mean          | 93.                  | 82.   | 81.   | 95.                   | 95.           | 116. | 93.                   | 102.  |  |
|                                 | Sdev          | 6.2                  | 28.0  | 19.8  | 25.6                  | 21.5          | 16.2 | 19.7                  | 20.5  |  |
| R-R interval<br>ms              | N             | 5                    | 3     | 3     | 5                     | 5             | 3    | 3                     | 5     |  |
|                                 | Mean          | 642.                 | 780.  | 769.  | 672.                  | 664.          | 523. | 658.                  | 599.  |  |
|                                 | Sdev          | 41.8                 | 221.6 | 184.0 | 204.8                 | 176.5         | 70.9 | 124.6                 | 102.4 |  |
| P wave duration<br>ms           | N             | 5                    | 3     | 3     | 5                     | 5             | 3    | 3                     | 5     |  |
|                                 | Mean          | 38.                  | 37.   | 37.   | 39.                   | 41.           | 37.  | 38.                   | 36.+  |  |
|                                 | Sdev          | 1.8                  | 1.5   | 4.4   | 3.0                   | 3.4           | 2.1  | 1.7                   | 2.3   |  |
| P-R interval<br>ms              | N             | 5                    | 3     | 3     | 5                     | 5             | 3    | 3                     | 5     |  |
|                                 | Mean          | 87.                  | 89.   | 97.   | 86.                   | 88.           | 83.  | 92.                   | 87.   |  |
|                                 | Sdev          | 5.8                  | 9.3   | 2.1   | 8.5                   | 12.8          | 2.5  | 5.8                   | 11.3  |  |
| QRS complex duration<br>ms      | N             | 5                    | 3     | 3     | 5                     | 5             | 3    | 3                     | 5     |  |
|                                 | Mean          | 47.                  | 46.   | 55.   | 44.                   | 46.           | 51.  | 49.                   | 50.   |  |
|                                 | Sdev          | 11.7                 | 2.6   | 9.0   | 1.3                   | 7.0           | 7.2  | 5.5                   | 10.6  |  |
| Q-T interval<br>ms              | N             | 5                    | 3     | 3     | 5                     | 5             | 3    | 3                     | 5     |  |
|                                 | Mean          | 179.                 | 186.  | 190.  | 179.                  | 185.          | 180. | 183.                  | 177.  |  |
|                                 | Sdev          | 1.8                  | 11.5  | 13.6  | 6.8                   | 6.5           | 1.2  | 10.1                  | 6.4   |  |
| Q-T interval (Fridericia)<br>ms | N             | 5                    | 3     | 3     | 5                     | 5             | 3    | 3                     | 5     |  |
|                                 | Mean          | 208.                 | 204.  | 209.  | 207.                  | 214.          | 224. | 210.                  | 211.  |  |
|                                 | Sdev          | 5.7                  | 8.6   | 10.3  | 19.9                  | 14.3          | 10.6 | 2.7                   | 8.7   |  |
| Group 1:Vehicle                 |               | Group 2:50 mg/kg/day |       |       | Group 3:200 mg/kg/day |               |      | Group 4:800 mg/kg/day |       |  |

Group means without footnotes were not statistically different from the control at p=0.05 or p=0.01.

+ The group mean was significantly different from the control at p=0.05 with Dunnett's test

CONFIDENTIAL  
 Table 3  
 Day -5 ECG Examinations  
 Pretest phase

Session 1 (Scheduled)  
 Fexinidazole

Study Number: 0505-2007

| Parameter                   | Group Number: | M a l e s |       |       |       | F e m a l e s |       |       |       |
|-----------------------------|---------------|-----------|-------|-------|-------|---------------|-------|-------|-------|
|                             |               | 1         | 2     | 3     | 4     | 1             | 2     | 3     | 4     |
| Mean Electrical Axis degree | N             | 5         | 3     | 3     | 5     | 5             | 3     | 3     | 5     |
|                             | Mean          | 45.       | 51.   | 59.   | 38.   | 46.           | 44.   | 42.   | 50.   |
|                             | Sdev          | 60.1      | 12.2  | 12.2  | 11.7  | 32.1          | 10.0  | 28.4  | 24.8  |
| P wave amplitude mV         | N             | 5         | 3     | 3     | 5     | 5             | 3     | 3     | 5     |
|                             | Mean          | 0.30      | 0.36  | 0.35  | 0.41  | 0.32          | 0.39  | 0.44  | 0.37  |
|                             | Sdev          | 0.072     | 0.042 | 0.059 | 0.092 | 0.143         | 0.139 | 0.087 | 0.093 |
| Q wave amplitude mV         | N             | 5         | 3     | 3     | 5     | 5             | 3     | 3     | 5     |
|                             | Mean          | -0.37     | -0.37 | -0.50 | -0.48 | -0.39         | -0.67 | -0.69 | -0.51 |
|                             | Sdev          | 0.168     | 0.144 | 0.242 | 0.181 | 0.128         | 0.389 | 0.160 | 0.348 |
| R wave amplitude mV         | N             | 5         | 3     | 3     | 5     | 5             | 3     | 3     | 5     |
|                             | Mean          | 1.88      | 2.99  | 3.01  | 2.17  | 2.45          | 2.31  | 2.71  | 3.00  |
|                             | Sdev          | 0.839     | 0.483 | 0.449 | 0.483 | 0.348         | 0.829 | 0.578 | 1.378 |
| S wave amplitude mV         | N             | 5         | 3     | 3     | 5     | 5             | 3     | 3     | 5     |
|                             | Mean          | -0.19     | -0.14 | -0.10 | -0.16 | -0.31         | -0.30 | -0.23 | -0.12 |
|                             | Sdev          | 0.098     | 0.110 | 0.058 | 0.080 | 0.163         | 0.167 | 0.229 | 0.063 |
| S-T segment deviation mV    | N             | 5         | 3     | 3     | 5     | 5             | 3     | 3     | 5     |
|                             | Mean          | -0.07     | -0.04 | -0.10 | -0.06 | -0.03         | -0.04 | -0.05 | -0.07 |
|                             | Sdev          | 0.057     | 0.059 | 0.058 | 0.025 | 0.062         | 0.166 | 0.026 | 0.060 |
| T wave amplitude mV         | N             | 5         | 3     | 3     | 5     | 5             | 3     | 3     | 5     |
|                             | Mean          | 0.20      | 0.10  | 0.17  | 0.15  | 0.20          | -0.22 | 0.55  | 0.05  |
|                             | Sdev          | 0.333     | 0.165 | 0.225 | 0.348 | 0.243         | 0.411 | 0.191 | 0.267 |

Group 1:Vehicle                      Group 2:50 mg/kg/day                      Group 3:200 mg/kg/day                      Group 4:800 mg/kg/day

Group means without footnotes were not statistically different from the control at p=0.05 or p=0.01.

CONFIDENTIAL  
 Table 3  
 Day 24 ECG Examinations  
 Test period

Session 1 (Scheduled)  
 Fexinidazole

Study Number: 0505-2007

| Parameter                       | Group Number: | M a l e s |       |       |      | F e m a l e s |      |       |       |
|---------------------------------|---------------|-----------|-------|-------|------|---------------|------|-------|-------|
|                                 |               | 1         | 2     | 3     | 4    | 1             | 2    | 3     | 4     |
| Heart rate<br>bpm               | N             | 5         | 3     | 3     | 5    | 5             | 3    | 3     | 5     |
|                                 | Mean          | 95.       | 102.  | 97.   | 100. | 99.           | 108. | 112.  | 110.  |
|                                 | Sdev          | 19.2      | 38.3  | 36.7  | 13.1 | 20.2          | 11.6 | 14.4  | 32.3  |
| R-R interval<br>ms              | N             | 5         | 3     | 3     | 5    | 5             | 3    | 3     | 5     |
|                                 | Mean          | 646.      | 665.  | 669.  | 606. | 629.          | 555. | 543.  | 580.  |
|                                 | Sdev          | 117.3     | 316.0 | 213.1 | 82.6 | 143.3         | 63.9 | 75.9  | 169.7 |
| P wave duration<br>ms           | N             | 5         | 3     | 3     | 5    | 5             | 3    | 3     | 5     |
|                                 | Mean          | 35.       | 34.   | 40.   | 37.  | 42.           | 35.+ | 40.   | 38.   |
|                                 | Sdev          | 3.2       | 2.3   | 4.2   | 3.8  | 3.5           | 1.5  | 1.0   | 4.2   |
| P-R interval<br>ms              | N             | 5         | 3     | 3     | 5    | 5             | 3    | 3     | 5     |
|                                 | Mean          | 81.       | 82.   | 90.   | 86.  | 83.           | 89.  | 87.   | 86.   |
|                                 | Sdev          | 8.0       | 6.4   | 7.8   | 5.9  | 6.6           | 0.6  | 2.5   | 10.0  |
| QRS complex duration<br>ms      | N             | 5         | 3     | 3     | 5    | 5             | 3    | 3     | 5     |
|                                 | Mean          | 47.       | 45.   | 53.   | 44.  | 48.           | 48.  | 53.   | 53.   |
|                                 | Sdev          | 5.9       | 3.8   | 7.6   | 1.9  | 5.6           | 6.1  | 3.5   | 7.9   |
| Q-T interval<br>ms              | N             | 5         | 3     | 3     | 5    | 5             | 3    | 3     | 5     |
|                                 | Mean          | 189.      | 187.  | 196.  | 197. | 186.          | 184. | 192.  | 192.  |
|                                 | Sdev          | 9.9       | 14.0  | 8.5   | 8.1  | 13.5          | 10.1 | 7.6   | 16.5  |
| Q-T interval (Fridericia)<br>ms | N             | 5         | 3     | 3     | 5    | 5             | 3    | 3     | 5     |
|                                 | Mean          | 219.      | 219.  | 227.  | 233. | 218.          | 224. | 235.+ | 231.  |
|                                 | Sdev          | 5.7       | 15.4  | 19.2  | 12.0 | 6.7           | 5.8  | 8.9   | 9.7   |

Group 1: Vehicle

Group 2: 50 mg/kg/day

Group 3: 200 mg/kg/day

Group 4: 800 mg/kg/day

Group means without footnotes were not statistically different from the control at p=0.05 or p=0.01.

+ The group mean was significantly different from the control at p=0.05 with Dunnett's test

CONFIDENTIAL  
 Table 3  
 Day 24 ECG Examinations  
 Test period

Session 1 (Scheduled)  
 Fexinidazole

Study Number: 0505-2007

| Parameter                   | Group Number: | M a l e s            |       |       |                       | F e m a l e s |       |                       |        |  |
|-----------------------------|---------------|----------------------|-------|-------|-----------------------|---------------|-------|-----------------------|--------|--|
|                             |               | 1                    | 2     | 3     | 4                     | 1             | 2     | 3                     | 4      |  |
| Mean Electrical Axis degree | N             | 5                    | 3     | 3     | 5                     | 5             | 3     | 3                     | 5      |  |
|                             | Mean          | 52.                  | 57.   | 61.   | 63.                   | 53.           | 56.   | 50.                   | 53.    |  |
|                             | Sdev          | 43.2                 | 6.7   | 2.1   | 23.1                  | 36.3          | 9.2   | 19.1                  | 23.7   |  |
| P wave amplitude mV         | N             | 5                    | 3     | 3     | 5                     | 5             | 3     | 3                     | 5      |  |
|                             | Mean          | 0.35                 | 0.39  | 0.38  | 0.41                  | 0.40          | 0.40  | 0.48                  | 0.40   |  |
|                             | Sdev          | 0.059                | 0.012 | 0.036 | 0.086                 | 0.070         | 0.062 | 0.167                 | 0.162  |  |
| Q wave amplitude mV         | N             | 5                    | 3     | 3     | 5                     | 5             | 3     | 3                     | 5      |  |
|                             | Mean          | -0.32                | -0.40 | -0.63 | -0.55                 | -0.42         | -0.57 | -0.68                 | -0.46  |  |
|                             | Sdev          | 0.110                | 0.111 | 0.460 | 0.295                 | 0.220         | 0.240 | 0.137                 | 0.314  |  |
| R wave amplitude mV         | N             | 5                    | 3     | 3     | 5                     | 5             | 3     | 3                     | 5      |  |
|                             | Mean          | 2.05                 | 3.17  | 3.24  | 2.25                  | 2.62          | 2.62  | 3.05                  | 2.88   |  |
|                             | Sdev          | 0.904                | 0.706 | 0.299 | 0.406                 | 0.443         | 0.691 | 0.813                 | 1.182  |  |
| S wave amplitude mV         | N             | 5                    | 3     | 3     | 5                     | 5             | 3     | 3                     | 5      |  |
|                             | Mean          | -0.16                | -0.13 | -0.16 | -0.23                 | -0.26         | -0.38 | -0.26                 | -0.12  |  |
|                             | Sdev          | 0.104                | 0.026 | 0.142 | 0.130                 | 0.236         | 0.302 | 0.254                 | 0.076  |  |
| S-T segment deviation mV    | N             | 5                    | 3     | 3     | 5                     | 5             | 3     | 3                     | 5      |  |
|                             | Mean          | -0.05                | -0.08 | -0.10 | -0.07                 | -0.02         | -0.02 | -0.08                 | -0.06  |  |
|                             | Sdev          | 0.028                | 0.084 | 0.066 | 0.077                 | 0.054         | 0.038 | 0.025                 | 0.072  |  |
| T wave amplitude mV         | N             | 5                    | 3     | 3     | 5                     | 5             | 3     | 3                     | 5      |  |
|                             | Mean          | 0.29                 | -0.20 | 0.02  | -0.14                 | 0.40          | 0.03  | 0.46                  | -0.02+ |  |
|                             | Sdev          | 0.286                | 0.168 | 0.335 | 0.222                 | 0.209         | 0.313 | 0.135                 | 0.218  |  |
| Group 1:Vehicle             |               | Group 2:50 mg/kg/day |       |       | Group 3:200 mg/kg/day |               |       | Group 4:800 mg/kg/day |        |  |

Group means without footnotes were not statistically different from the control at p=0.05 or p=0.01.

+ The group mean was significantly different from the control at p=0.05 with Dunnett's test

CONFIDENTIAL  
 Table 3  
 Day 38 ECG Examinations  
 Test period

Session 1 (Scheduled)  
 Fexinidazole

Study Number: 0505-2007

| Parameter                       | Group Number: | M a l e s |   |   |       | F e m a l e s |   |   |       |
|---------------------------------|---------------|-----------|---|---|-------|---------------|---|---|-------|
|                                 |               | 1         | 2 | 3 | 4     | 1             | 2 | 3 | 4     |
| Heart rate<br>bpm               | N             | 2         | 0 | 0 | 2     | 2             | 0 | 0 | 2     |
|                                 | Mean          | 83.       | - | - | 91.   | 101.          | - | - | 102.  |
|                                 | Sdev          | 15.6      | - | - | 35.4  | 35.4          | - | - | 28.3  |
| R-R interval<br>ms              | N             | 2         | 0 | 0 | 2     | 2             | 0 | 0 | 2     |
|                                 | Mean          | 734.      | - | - | 708.  | 629.          | - | - | 609.  |
|                                 | Sdev          | 137.9     | - | - | 273.7 | 219.9         | - | - | 169.0 |
| P wave duration<br>ms           | N             | 2         | 0 | 0 | 2     | 2             | 0 | 0 | 2     |
|                                 | Mean          | 39.       | - | - | 42.   | 41.           | - | - | 40.   |
|                                 | Sdev          | 4.9       | - | - | 3.5   | 4.9           | - | - | 2.8   |
| P-R interval<br>ms              | N             | 2         | 0 | 0 | 2     | 2             | 0 | 0 | 2     |
|                                 | Mean          | 87.       | - | - | 101.  | 102.          | - | - | 90.   |
|                                 | Sdev          | 9.2       | - | - | 2.8   | 19.8          | - | - | 2.1   |
| QRS complex duration<br>ms      | N             | 2         | 0 | 0 | 2     | 2             | 0 | 0 | 2     |
|                                 | Mean          | 51.       | - | - | 51.   | 51.           | - | - | 49.   |
|                                 | Sdev          | 3.5       | - | - | 11.3  | 5.7           | - | - | 7.8   |
| Q-T interval<br>ms              | N             | 2         | 0 | 0 | 2     | 2             | 0 | 0 | 2     |
|                                 | Mean          | 199.      | - | - | 203.  | 194.          | - | - | 204.  |
|                                 | Sdev          | 7.1       | - | - | 14.8  | 10.6          | - | - | 10.6  |
| Q-T interval (Fridericia)<br>ms | N             | 2         | 0 | 0 | 2     | 2             | 0 | 0 | 2     |
|                                 | Mean          | 222.      | - | - | 230.  | 228.          | - | - | 241.  |
|                                 | Sdev          | 21.7      | - | - | 13.2  | 14.4          | - | - | 9.8   |

Group 1: Vehicle

Group 2: 50 mg/kg/day

Group 3: 200 mg/kg/day

Group 4: 800 mg/kg/day

Group means without footnotes were not statistically different from the control at p=0.05 or p=0.01.

CONFIDENTIAL  
 Table 3  
 Day 38 ECG Examinations  
 Test period

Session 1 (Scheduled)  
 Fexinidazole

Study Number: 0505-2007

| Parameter                   | Group Number: | M a l e s |   |   |       | F e m a l e s |   |   |       |
|-----------------------------|---------------|-----------|---|---|-------|---------------|---|---|-------|
|                             |               | 1         | 2 | 3 | 4     | 1             | 2 | 3 | 4     |
| Mean Electrical Axis degree | N             | 2         | 0 | 0 | 2     | 2             | 0 | 0 | 2     |
|                             | Mean          | 19.       | - | - | 84.   | 57.           | - | - | 70.   |
|                             | Sdev          | 53.7      | - | - | 7.8   | 22.6          | - | - | 6.4   |
| P wave amplitude mV         | N             | 2         | 0 | 0 | 2     | 2             | 0 | 0 | 2     |
|                             | Mean          | 0.30      | - | - | 0.39  | 0.39          | - | - | 0.36  |
|                             | Sdev          | 0.057     | - | - | 0.078 | 0.127         | - | - | 0.141 |
| Q wave amplitude mV         | N             | 2         | 0 | 0 | 2     | 2             | 0 | 0 | 2     |
|                             | Mean          | -0.26     | - | - | -0.34 | -0.39         | - | - | -0.46 |
|                             | Sdev          | 0.141     | - | - | 0.184 | 0.014         | - | - | 0.269 |
| R wave amplitude mV         | N             | 2         | 0 | 0 | 2     | 2             | 0 | 0 | 2     |
|                             | Mean          | 1.61      | - | - | 2.23  | 2.64          | - | - | 2.98  |
|                             | Sdev          | 0.997     | - | - | 0.332 | 0.403         | - | - | 1.301 |
| S wave amplitude mV         | N             | 2         | 0 | 0 | 2     | 2             | 0 | 0 | 2     |
|                             | Mean          | -0.30     | - | - | -0.17 | -0.36         | - | - | -0.09 |
|                             | Sdev          | 0.049     | - | - | 0.014 | 0.283         | - | - | 0.042 |
| S-T segment deviation mV    | N             | 2         | 0 | 0 | 2     | 2             | 0 | 0 | 2     |
|                             | Mean          | -0.03     | - | - | -0.07 | 0.05          | - | - | 0.00  |
|                             | Sdev          | 0.064     | - | - | 0.014 | 0.064         | - | - | 0.071 |
| T wave amplitude mV         | N             | 2         | 0 | 0 | 2     | 2             | 0 | 0 | 2     |
|                             | Mean          | 0.22      | - | - | 0.27  | -0.04         | - | - | 0.18  |
|                             | Sdev          | 0.141     | - | - | 0.269 | 0.573         | - | - | 0.071 |

Group 1:Vehicle

Group 2:50 mg/kg/day

Group 3:200 mg/kg/day

Group 4:800 mg/kg/day

Group means without footnotes were not statistically different from the control at p=0.05 or p=0.01.



***Table 4 Ophthalmoscopic Examination***

CONFIDENTIAL

Table 4  
Incidence of Ophthalmoscopic Findings

Fexinidazole

Study Number: 0505-2007

| Study Day       | Group:                                | M a l e s            |   |                       |   |                       |  |
|-----------------|---------------------------------------|----------------------|---|-----------------------|---|-----------------------|--|
|                 |                                       | 1                    | 2 | 3                     | 4 |                       |  |
| -5              | NORMAL /Normal (No Abnormal Findings) | 5                    | 3 | 3                     | 5 |                       |  |
| 24              | NORMAL /Normal (No Abnormal Findings) | 5                    | 3 | 3                     | 5 |                       |  |
| 38              | NORMAL /Normal (No Abnormal Findings) | 2                    | 0 | 0                     | 2 |                       |  |
| Group 1:Vehicle |                                       | Group 2:50 mg/kg/day |   | Group 3:200 mg/kg/day |   | Group 4:800 mg/kg/day |  |

CONFIDENTIAL

Table 4

Incidence of Ophthalmoscopic Findings

Fexinidazole

Study Number: 0505-2007

| Study Day       | Group:                                | F e m a l e s        |   |                       |   |
|-----------------|---------------------------------------|----------------------|---|-----------------------|---|
|                 |                                       | 1                    | 2 | 3                     | 4 |
| -5              | NORMAL /Normal (No Abnormal Findings) | 5                    | 3 | 3                     | 5 |
| 24              | NORMAL /Normal (No Abnormal Findings) | 4                    | 3 | 3                     | 5 |
|                 | CORNEA /opacity area/s, monolateral   | 1                    | 0 | 0                     | 0 |
| 38              | NORMAL /Normal (No Abnormal Findings) | 1                    | 0 | 0                     | 2 |
|                 | CORNEA /opacity area/s, monolateral   | 1                    | 0 | 0                     | 0 |
| Group 1:Vehicle |                                       | Group 2:50 mg/kg/day |   | Group 3:200 mg/kg/day |   |
|                 |                                       |                      |   | Group 4:800 mg/kg/day |   |

***Table 5 Hematology***

CONFIDENTIAL

Table 5  
Day -7 Hematology Data  
Pretest phase

Session 1 (Scheduled)  
Fexinidazole

Study Number: 0505-2007

| Parameter                               | Group Number: | M a l e s            |       |       |                       | F e m a l e s |       |                       |       |  |
|-----------------------------------------|---------------|----------------------|-------|-------|-----------------------|---------------|-------|-----------------------|-------|--|
|                                         |               | 1                    | 2     | 3     | 4                     | 1             | 2     | 3                     | 4     |  |
| RED BLOOD CELLS<br>10 <sup>6</sup> /mcL | N             | 5                    | 3     | 3     | 5                     | 5             | 3     | 3                     | 5     |  |
|                                         | Mean          | 6.55                 | 7.08  | 6.74  | 6.57                  | 6.54          | 7.46* | 6.77                  | 6.81  |  |
|                                         | Sdev          | 0.342                | 0.498 | 0.662 | 0.484                 | 0.298         | 0.427 | 0.162                 | 0.403 |  |
| HEMOGLOBIN<br>g/dL                      | N             | 5                    | 3     | 3     | 5                     | 5             | 3     | 3                     | 5     |  |
|                                         | Mean          | 14.9                 | 16.2  | 15.3  | 15.0                  | 14.9          | 17.2* | 15.4                  | 15.5  |  |
|                                         | Sdev          | 0.86                 | 1.10  | 1.35  | 0.96                  | 0.79          | 0.85  | 0.65                  | 0.73  |  |
| HEMATOCRIT<br>%                         | N             | 5                    | 3     | 3     | 5                     | 5             | 3     | 3                     | 5     |  |
|                                         | Mean          | 42.4                 | 46.0  | 43.8  | 42.8                  | 43.9          | 50.5* | 45.2                  | 46.1  |  |
|                                         | Sdev          | 2.45                 | 2.97  | 4.01  | 2.84                  | 2.10          | 2.25  | 1.69                  | 2.44  |  |
| MEAN CORPUSCULAR VOLUME<br>fL           | N             | 5                    | 3     | 3     | 5                     | 5             | 3     | 3                     | 5     |  |
|                                         | Mean          | 64.8                 | 65.0  | 65.0  | 65.2                  | 67.1          | 67.8  | 66.8                  | 67.6  |  |
|                                         | Sdev          | 1.07                 | 1.42  | 0.52  | 0.89                  | 0.49          | 0.86  | 0.96                  | 1.36  |  |
| MEAN CORPUSCULAR HEMOGLOBIN<br>pg       | N             | 5                    | 3     | 3     | 5                     | 5             | 3     | 3                     | 5     |  |
|                                         | Mean          | 22.8                 | 22.8  | 22.7  | 22.9                  | 22.7          | 23.1  | 22.6                  | 22.8  |  |
|                                         | Sdev          | 0.62                 | 0.70  | 0.20  | 0.36                  | 0.23          | 0.20  | 0.55                  | 0.67  |  |
| MEAN CORPUSCULAR HGB CONC.<br>g/dL      | N             | 5                    | 3     | 3     | 5                     | 5             | 3     | 3                     | 5     |  |
|                                         | Mean          | 35.2                 | 35.1  | 34.9  | 35.1                  | 33.8          | 34.1  | 33.9                  | 33.7  |  |
|                                         | Sdev          | 0.44                 | 0.35  | 0.15  | 0.29                  | 0.37          | 0.17  | 0.40                  | 0.35  |  |
| RED CELL DISTRIBUTION WIDTH<br>%        | N             | 5                    | 3     | 3     | 5                     | 5             | 3     | 3                     | 5     |  |
|                                         | Mean          | 13.2                 | 13.1  | 13.1  | 13.1                  | 11.2          | 11.4  | 11.4                  | 11.2  |  |
|                                         | Sdev          | 0.53                 | 0.23  | 0.26  | 0.26                  | 0.48          | 0.36  | 0.15                  | 0.31  |  |
| Group 1:Vehicle                         |               | Group 2:50 mg/kg/day |       |       | Group 3:200 mg/kg/day |               |       | Group 4:800 mg/kg/day |       |  |

Group means without footnotes were not statistically different from the control at p=0.05 or p=0.01.

\* The group mean was significantly different from the control at p=0.01 with Dunnett's test of significance

CONFIDENTIAL  
 Table 5  
 Day -7 Hematology Data  
 Pretest phase

Session 1 (Scheduled)  
 Fexinidazole

Study Number: 0505-2007

| Parameter                               | Group Number: | M a l e s |       |       |       | F e m a l e s |       |       |       |
|-----------------------------------------|---------------|-----------|-------|-------|-------|---------------|-------|-------|-------|
|                                         |               | 1         | 2     | 3     | 4     | 1             | 2     | 3     | 4     |
| HEMOGLOBIN DISTRIB. WIDTH<br>g/dL       | N             | 5         | 3     | 3     | 5     | 5             | 3     | 3     | 5     |
|                                         | Mean          | 1.59      | 1.65  | 1.59  | 1.62  | 1.70          | 1.71  | 1.67  | 1.68  |
|                                         | Sdev          | 0.048     | 0.040 | 0.085 | 0.088 | 0.044         | 0.021 | 0.047 | 0.041 |
| RETICULOCYTES<br>%                      | N             | 5         | 3     | 3     | 5     | 5             | 3     | 3     | 5     |
|                                         | Mean          | 0.7       | 1.1   | 0.7   | 0.6   | 0.5           | 0.8   | 0.5   | 0.5   |
|                                         | Sdev          | 0.27      | 0.21  | 0.17  | 0.26  | 0.13          | 0.25  | 0.14  | 0.21  |
| RETICULOCYTES ABS<br>10 <sup>9</sup> /L | N             | 5         | 3     | 3     | 5     | 5             | 3     | 3     | 5     |
|                                         | Mean          | 48.2      | 76.1  | 46.2  | 42.3  | 30.3          | 61.5+ | 33.7  | 37.1  |
|                                         | Sdev          | 18.30     | 10.24 | 15.60 | 19.39 | 7.54          | 20.22 | 9.01  | 15.87 |
| MEAN CORPUSCOLAR VOL. RETIC.<br>fL      | N             | 5         | 3     | 3     | 5     | 5             | 3     | 3     | 5     |
|                                         | Mean          | 85.4      | 87.4  | 86.0  | 85.4  | 85.7          | 88.0  | 84.8  | 85.3  |
|                                         | Sdev          | 2.57      | 2.45  | 3.33  | 2.68  | 1.44          | 3.67  | 2.87  | 3.31  |
| MEAN HEMOGLOBIN CONC. RETIC.<br>g/dL    | N             | 5         | 3     | 3     | 5     | 5             | 3     | 3     | 5     |
|                                         | Mean          | 30.5      | 30.0  | 30.4  | 30.8  | 29.0          | 28.5  | 28.7  | 29.1  |
|                                         | Sdev          | 0.78      | 0.95  | 0.59  | 0.63  | 0.62          | 0.83  | 0.26  | 0.71  |
| CELLULAR HEMOGLOBIN RETIC.<br>pg        | N             | 5         | 3     | 3     | 5     | 5             | 3     | 3     | 5     |
|                                         | Mean          | 25.9      | 26.2  | 26.0  | 26.2  | 24.6          | 25.0  | 24.3  | 24.5  |
|                                         | Sdev          | 0.41      | 0.76  | 0.92  | 0.56  | 0.38          | 0.35  | 0.65  | 0.75  |
| PLATELETS<br>10 <sup>3</sup> /mcL       | N             | 5         | 3     | 3     | 5     | 5             | 3     | 3     | 5     |
|                                         | Mean          | 332.      | 229.  | 322.  | 300.  | 341.          | 321.  | 348.  | 294.  |
|                                         | Sdev          | 100.0     | 53.6  | 85.0  | 88.3  | 82.3          | 89.4  | 69.6  | 30.1  |

Group 1:Vehicle

Group 2:50 mg/kg/day

Group 3:200 mg/kg/day

Group 4:800 mg/kg/day

Group means without footnotes were not statistically different from the control at p=0.05 or p=0.01.

+ The group mean was significantly different from the control at p=0.05 with Dunnett's test of significance

CONFIDENTIAL  
Table 5  
Day -7 Hematology Data  
Pretest phase

Session 1 (Scheduled)  
Fexinidazole

Study Number: 0505-2007

| Parameter                                 | Group Number: | M a l e s            |       |       |                       | F e m a l e s |       |                       |       |  |
|-------------------------------------------|---------------|----------------------|-------|-------|-----------------------|---------------|-------|-----------------------|-------|--|
|                                           |               | 1                    | 2     | 3     | 4                     | 1             | 2     | 3                     | 4     |  |
| MEAN PLATELET VOLUME<br>fL                | N             | 5                    | 3     | 3     | 5                     | 5             | 3     | 3                     | 5     |  |
|                                           | Mean          | 11.1                 | 11.8  | 11.4  | 11.0                  | 9.5           | 10.5  | 9.4                   | 9.6   |  |
|                                           | Sdev          | 0.91                 | 0.66  | 1.97  | 1.62                  | 1.12          | 1.46  | 0.99                  | 0.53  |  |
| PLATELET DISTRIBUTION WIDTH<br>%          | N             | 5                    | 3     | 3     | 5                     | 5             | 3     | 3                     | 5     |  |
|                                           | Mean          | 62.4                 | 63.7  | 60.7  | 62.7                  | 56.6          | 59.6  | 56.9                  | 54.3  |  |
|                                           | Sdev          | 2.51                 | 4.32  | 4.91  | 3.24                  | 6.62          | 1.83  | 1.92                  | 3.79  |  |
| PLATELET HEMATOCRIT<br>%                  | N             | 5                    | 3     | 3     | 5                     | 5             | 3     | 3                     | 5     |  |
|                                           | Mean          | 0.37                 | 0.27  | 0.36  | 0.33                  | 0.32          | 0.33  | 0.32                  | 0.28  |  |
|                                           | Sdev          | 0.110                | 0.056 | 0.040 | 0.093                 | 0.083         | 0.066 | 0.074                 | 0.016 |  |
| WHITE BLOOD CELLS<br>10 <sup>3</sup> /mcL | N             | 5                    | 3     | 3     | 5                     | 5             | 3     | 3                     | 5     |  |
|                                           | Mean          | 8.93                 | 8.50  | 10.34 | 8.30                  | 10.50         | 10.82 | 9.58                  | 8.07+ |  |
|                                           | Sdev          | 1.218                | 1.792 | 1.990 | 1.632                 | 1.667         | 1.275 | 1.092                 | 0.493 |  |
| NEUTROPHILS ABS<br>10 <sup>3</sup> /mcL   | N             | 5                    | 3     | 3     | 5                     | 5             | 3     | 3                     | 5     |  |
|                                           | Mean          | 5.01                 | 4.74  | 6.31  | 4.70                  | 6.12          | 6.53  | 5.57                  | 4.59  |  |
|                                           | Sdev          | 0.909                | 1.311 | 1.067 | 1.317                 | 1.129         | 1.184 | 2.026                 | 0.517 |  |
| LYMPHOCYTES ABS<br>10 <sup>3</sup> /mcL   | N             | 5                    | 3     | 3     | 5                     | 5             | 3     | 3                     | 5     |  |
|                                           | Mean          | 3.07                 | 2.89  | 3.02  | 2.77                  | 3.47          | 3.12  | 2.92                  | 2.63  |  |
|                                           | Sdev          | 0.370                | 0.480 | 0.608 | 0.525                 | 0.655         | 0.152 | 0.870                 | 0.263 |  |
| MONOCYTES ABS<br>10 <sup>3</sup> /mcL     | N             | 5                    | 3     | 3     | 5                     | 5             | 3     | 3                     | 5     |  |
|                                           | Mean          | 0.43                 | 0.41  | 0.64  | 0.42                  | 0.50          | 0.53  | 0.42                  | 0.31  |  |
|                                           | Sdev          | 0.105                | 0.137 | 0.361 | 0.095                 | 0.148         | 0.129 | 0.078                 | 0.102 |  |
| Group 1:Vehicle                           |               | Group 2:50 mg/kg/day |       |       | Group 3:200 mg/kg/day |               |       | Group 4:800 mg/kg/day |       |  |

Group means without footnotes were not statistically different from the control at p=0.05 or p=0.01.

+ The group mean was significantly different from the control at p=0.05 with Dunnett's test of significance

CONFIDENTIAL  
 Table 5  
 Day -7 Hematology Data  
 Pretest phase

Session 1 (Scheduled)  
 Fexinidazole

Study Number: 0505-2007

| Parameter                                         | Group Number: | M a l e s |       |       |       | F e m a l e s |       |       |       |
|---------------------------------------------------|---------------|-----------|-------|-------|-------|---------------|-------|-------|-------|
|                                                   |               | 1         | 2     | 3     | 4     | 1             | 2     | 3     | 4     |
| EOSINOPHILS ABS<br>10 <sup>3</sup> /mcL           | N             | 5         | 3     | 3     | 5     | 5             | 3     | 3     | 5     |
|                                                   | Mean          | 0.28      | 0.26  | 0.21  | 0.28  | 0.21          | 0.43  | 0.46  | 0.39  |
|                                                   | Sdev          | 0.162     | 0.139 | 0.044 | 0.219 | 0.131         | 0.140 | 0.483 | 0.357 |
| BASOPHILS ABS<br>10 <sup>3</sup> /mcL             | N             | 5         | 3     | 3     | 5     | 5             | 3     | 3     | 5     |
|                                                   | Mean          | 0.08      | 0.14  | 0.11  | 0.10  | 0.14          | 0.15  | 0.15  | 0.10  |
|                                                   | Sdev          | 0.037     | 0.042 | 0.023 | 0.029 | 0.031         | 0.031 | 0.091 | 0.021 |
| LARGE UNSTAINED CELLS ABS<br>10 <sup>3</sup> /mcL | N             | 5         | 3     | 3     | 5     | 5             | 3     | 3     | 5     |
|                                                   | Mean          | 0.04      | 0.06  | 0.06  | 0.04  | 0.07          | 0.05  | 0.05  | 0.04  |
|                                                   | Sdev          | 0.016     | 0.015 | 0.021 | 0.021 | 0.011         | 0.010 | 0.040 | 0.013 |
| NEUTROPHILS %                                     | N             | 5         | 3     | 3     | 5     | 5             | 3     | 3     | 5     |
|                                                   | Mean          | 55.9      | 55.2  | 61.2  | 56.2  | 58.2          | 60.1  | 57.2  | 56.9  |
|                                                   | Sdev          | 4.69      | 5.03  | 2.36  | 7.00  | 5.12          | 3.70  | 13.89 | 5.46  |
| LYMPHOCITES %                                     | N             | 5         | 3     | 3     | 5     | 5             | 3     | 3     | 5     |
|                                                   | Mean          | 34.7      | 34.5  | 29.3  | 33.6  | 33.1          | 29.1  | 31.2  | 32.7  |
|                                                   | Sdev          | 4.10      | 5.57  | 2.67  | 4.85  | 4.58          | 2.45  | 11.31 | 3.55  |
| MONOCYTES %                                       | N             | 5         | 3     | 3     | 5     | 5             | 3     | 3     | 5     |
|                                                   | Mean          | 4.9       | 4.8   | 5.8   | 5.1   | 4.7           | 4.9   | 4.4   | 3.8   |
|                                                   | Sdev          | 0.86      | 1.04  | 2.46  | 1.22  | 0.72          | 0.98  | 0.35  | 1.30  |
| EOSINOPHILS %                                     | N             | 5         | 3     | 3     | 5     | 5             | 3     | 3     | 5     |
|                                                   | Mean          | 3.2       | 2.9   | 2.1   | 3.3   | 2.0           | 4.0   | 5.1   | 4.8   |
|                                                   | Sdev          | 1.69      | 1.10  | 0.53  | 2.59  | 1.06          | 1.66  | 5.72  | 4.15  |

Group 1:Vehicle                      Group 2:50 mg/kg/day                      Group 3:200 mg/kg/day                      Group 4:800 mg/kg/day

Group means without footnotes were not statistically different from the control at p=0.05 or p=0.01.



CONFIDENTIAL  
 Table 5  
 Day -7 Hematology Data  
 Pretest phase

Session 1 (Scheduled)  
 Fexinidazole

Study Number: 0505-2007

| Parameter               | Group Number: | M a l e s            |      |      |                       | F e m a l e s |      |                       |      |  |
|-------------------------|---------------|----------------------|------|------|-----------------------|---------------|------|-----------------------|------|--|
|                         |               | 1                    | 2    | 3    | 4                     | 1             | 2    | 3                     | 4    |  |
| BASOPHILS %             | N             | 5                    | 3    | 3    | 5                     | 5             | 3    | 3                     | 5    |  |
|                         | Mean          | 0.9                  | 1.8  | 1.1  | 1.2                   | 1.4           | 1.4  | 1.6                   | 1.3  |  |
|                         | Sdev          | 0.40                 | 0.96 | 0.15 | 0.33                  | 0.32          | 0.26 | 0.98                  | 0.30 |  |
| LARGE UNSTAINED CELLS % | N             | 5                    | 3    | 3    | 5                     | 5             | 3    | 3                     | 5    |  |
|                         | Mean          | 0.5                  | 0.7  | 0.5  | 0.5                   | 0.6           | 0.5  | 0.6                   | 0.5  |  |
|                         | Sdev          | 0.18                 | 0.36 | 0.12 | 0.25                  | 0.15          | 0.12 | 0.46                  | 0.16 |  |
| Group 1:Vehicle         |               | Group 2:50 mg/kg/day |      |      | Group 3:200 mg/kg/day |               |      | Group 4:800 mg/kg/day |      |  |

Group means without footnotes were not statistically different from the control at p=0.05 or p=0.01.

CONFIDENTIAL  
Table 5  
Day 28 Hematology Data  
Test period

Session 1 (Scheduled)  
Fexinidazole

Study Number: 0505-2007

| Parameter                               | Group Number: | M a l e s |       |       |       | F e m a l e s |       |       |       |
|-----------------------------------------|---------------|-----------|-------|-------|-------|---------------|-------|-------|-------|
|                                         |               | 1         | 2     | 3     | 4     | 1             | 2     | 3     | 4     |
| RED BLOOD CELLS<br>10 <sup>6</sup> /mcL | N             | 5         | 3     | 3     | 5     | 5             | 3     | 3     | 5     |
|                                         | Mean          | 6.09      | 7.10  | 6.16  | 6.06  | 6.37          | 6.97  | 6.27  | 6.80  |
|                                         | Sdev          | 0.466     | 0.492 | 0.717 | 0.449 | 0.611         | 0.293 | 0.323 | 0.496 |
| HEMOGLOBIN<br>g/dL                      | N             | 5         | 3     | 3     | 5     | 5             | 3     | 3     | 5     |
|                                         | Mean          | 13.3      | 15.5  | 13.4  | 13.3  | 13.9          | 15.5  | 13.7  | 14.9  |
|                                         | Sdev          | 0.89      | 1.31  | 1.59  | 1.00  | 1.41          | 0.17  | 0.91  | 1.12  |
| HEMATOCRIT<br>%                         | N             | 5         | 3     | 3     | 5     | 5             | 3     | 3     | 5     |
|                                         | Mean          | 40.1      | 46.6  | 40.5  | 39.7  | 42.6          | 46.5  | 41.2  | 45.0  |
|                                         | Sdev          | 2.98      | 4.05  | 4.63  | 2.74  | 4.19          | 1.32  | 2.46  | 3.50  |
| MEAN CORPUSCULAR VOLUME<br>fL           | N             | 5         | 3     | 3     | 5     | 5             | 3     | 3     | 5     |
|                                         | Mean          | 65.8      | 65.6  | 65.8  | 65.6  | 66.8          | 66.8  | 65.6  | 66.1  |
|                                         | Sdev          | 1.21      | 1.39  | 0.68  | 0.99  | 0.64          | 1.23  | 0.82  | 1.20  |
| MEAN CORPUSCULAR HEMOGLOBIN<br>pg       | N             | 5         | 3     | 3     | 5     | 5             | 3     | 3     | 5     |
|                                         | Mean          | 21.9      | 21.9  | 21.8  | 22.0  | 21.8          | 22.3  | 21.8  | 21.9  |
|                                         | Sdev          | 0.61      | 0.36  | 0.49  | 0.15  | 0.46          | 0.71  | 0.59  | 0.54  |
| MEAN CORPUSCULAR HGB CONC.<br>g/dL      | N             | 5         | 3     | 3     | 5     | 5             | 3     | 3     | 5     |
|                                         | Mean          | 33.3      | 33.4  | 33.1  | 33.5  | 32.6          | 33.3  | 33.2  | 33.1  |
|                                         | Sdev          | 0.45      | 0.81  | 0.32  | 0.47  | 0.59          | 0.61  | 0.44  | 0.29  |
| RED CELL DISTRIBUTION WIDTH<br>%        | N             | 5         | 3     | 3     | 5     | 5             | 3     | 3     | 5     |
|                                         | Mean          | 12.2      | 11.6  | 12.0  | 11.9  | 11.7          | 12.4  | 11.4  | 11.4  |
|                                         | Sdev          | 0.24      | 0.53  | 0.40  | 0.39  | 0.39          | 0.49  | 0.45  | 0.23  |

Group 1:Vehicle

Group 2:50 mg/kg/day

Group 3:200 mg/kg/day

Group 4:800 mg/kg/day

Group means without footnotes were not statistically different from the control at p=0.05 or p=0.01.

CONFIDENTIAL  
Table 5  
Day 28 Hematology Data  
Test period

Session 1 (Scheduled)  
Fexinidazole

Study Number: 0505-2007

| Parameter                               | Group Number: | M a l e s |       |       |       | F e m a l e s |       |       |       |
|-----------------------------------------|---------------|-----------|-------|-------|-------|---------------|-------|-------|-------|
|                                         |               | 1         | 2     | 3     | 4     | 1             | 2     | 3     | 4     |
| HEMOGLOBIN DISTRIB. WIDTH<br>g/dL       | N             | 5         | 3     | 3     | 5     | 5             | 3     | 3     | 5     |
|                                         | Mean          | 1.81      | 1.75  | 1.80  | 1.81  | 1.75          | 1.89  | 1.72  | 1.79  |
|                                         | Sdev          | 0.063     | 0.075 | 0.055 | 0.071 | 0.085         | 0.103 | 0.026 | 0.047 |
| RETICULOCYTES<br>%                      | N             | 5         | 3     | 3     | 5     | 5             | 3     | 3     | 5     |
|                                         | Mean          | 1.0       | 0.7   | 0.5   | 0.6   | 0.6           | 1.3   | 0.4   | 0.5   |
|                                         | Sdev          | 0.35      | 0.29  | 0.11  | 0.24  | 0.41          | 0.64  | 0.15  | 0.24  |
| RETICULOCYTES ABS<br>10 <sup>9</sup> /L | N             | 5         | 3     | 3     | 5     | 5             | 3     | 3     | 5     |
|                                         | Mean          | 60.5      | 47.8  | 30.9  | 33.9  | 38.7          | 86.8+ | 23.8  | 32.4  |
|                                         | Sdev          | 21.72     | 21.01 | 6.64  | 15.33 | 21.27         | 44.03 | 8.20  | 18.19 |
| MEAN CORPUSCOLAR VOL. RETIC.<br>fL      | N             | 5         | 3     | 3     | 5     | 5             | 3     | 3     | 5     |
|                                         | Mean          | 89.7      | 89.5  | 87.3  | 87.8  | 87.7          | 89.8  | 86.6  | 88.3  |
|                                         | Sdev          | 2.47      | 2.91  | 2.64  | 2.59  | 1.48          | 2.60  | 4.00  | 2.38  |
| MEAN HEMOGLOBIN CONC. RETIC.<br>g/dL    | N             | 5         | 3     | 3     | 5     | 5             | 3     | 3     | 5     |
|                                         | Mean          | 27.5      | 28.0  | 27.8  | 28.3  | 27.8          | 27.8  | 27.7  | 27.9  |
|                                         | Sdev          | 0.54      | 0.92  | 0.15  | 0.43  | 0.32          | 0.76  | 0.17  | 0.43  |
| CELLULAR HEMOGLOBIN RETIC.<br>pg        | N             | 5         | 3     | 3     | 5     | 5             | 3     | 3     | 5     |
|                                         | Mean          | 24.5      | 24.9  | 24.2  | 24.7  | 24.3          | 24.8  | 23.9  | 24.5  |
|                                         | Sdev          | 0.55      | 0.40  | 0.90  | 0.62  | 0.44          | 0.31  | 1.25  | 0.65  |
| PLATELETS<br>10 <sup>3</sup> /mcL       | N             | 5         | 3     | 3     | 5     | 5             | 3     | 3     | 5     |
|                                         | Mean          | 370.      | 242.  | 384.  | 273.  | 424.          | 387.  | 363.  | 291.+ |
|                                         | Sdev          | 107.6     | 13.4  | 190.0 | 63.2  | 48.0          | 17.2  | 127.2 | 35.8  |

Group 1:Vehicle

Group 2:50 mg/kg/day

Group 3:200 mg/kg/day

Group 4:800 mg/kg/day

Group means without footnotes were not statistically different from the control at p=0.05 or p=0.01.

+ The group mean was significantly different from the control at p=0.05 with Dunnett's test of significance

CONFIDENTIAL  
 Table 5  
 Day 28 Hematology Data  
 Test period

Session 1 (Scheduled)  
 Fexinidazole

Study Number: 0505-2007

| Parameter                                 | Group Number: | M a l e s            |       |       |                       | F e m a l e s |       |                       |       |  |
|-------------------------------------------|---------------|----------------------|-------|-------|-----------------------|---------------|-------|-----------------------|-------|--|
|                                           |               | 1                    | 2     | 3     | 4                     | 1             | 2     | 3                     | 4     |  |
| MEAN PLATELET VOLUME<br>fL                | N             | 5                    | 3     | 3     | 5                     | 5             | 3     | 3                     | 5     |  |
|                                           | Mean          | 10.6                 | 10.9  | 10.4  | 10.9                  | 9.1           | 9.5   | 10.1                  | 10.3+ |  |
|                                           | Sdev          | 0.79                 | 0.93  | 1.10  | 1.46                  | 0.60          | 0.85  | 0.40                  | 0.66  |  |
| PLATELET DISTRIBUTION WIDTH<br>%          | N             | 5                    | 3     | 3     | 5                     | 5             | 3     | 3                     | 5     |  |
|                                           | Mean          | 58.7                 | 61.5  | 58.3  | 64.4+                 | 50.2          | 55.2  | 59.1+                 | 57.4+ |  |
|                                           | Sdev          | 3.36                 | 3.09  | 0.44  | 3.86                  | 4.25          | 4.01  | 3.77                  | 1.44  |  |
| PLATELET HEMATOCRIT<br>%                  | N             | 5                    | 3     | 3     | 5                     | 5             | 3     | 3                     | 5     |  |
|                                           | Mean          | 0.39                 | 0.26  | 0.38  | 0.30                  | 0.39          | 0.37  | 0.36                  | 0.30  |  |
|                                           | Sdev          | 0.117                | 0.035 | 0.145 | 0.071                 | 0.062         | 0.015 | 0.115                 | 0.029 |  |
| WHITE BLOOD CELLS<br>10 <sup>3</sup> /mcL | N             | 5                    | 3     | 3     | 5                     | 5             | 3     | 3                     | 5     |  |
|                                           | Mean          | 8.95                 | 7.72  | 7.78  | 7.84                  | 11.79         | 11.06 | 9.99                  | 7.88+ |  |
|                                           | Sdev          | 1.865                | 1.203 | 0.972 | 1.625                 | 2.592         | 1.892 | 1.036                 | 0.746 |  |
| NEUTROPHILS ABS<br>10 <sup>3</sup> /mcL   | N             | 5                    | 3     | 3     | 5                     | 5             | 3     | 3                     | 5     |  |
|                                           | Mean          | 5.51                 | 4.36  | 5.07  | 5.19                  | 7.26          | 7.34  | 6.57                  | 4.97+ |  |
|                                           | Sdev          | 1.555                | 0.794 | 1.117 | 1.559                 | 1.680         | 1.758 | 0.826                 | 0.763 |  |
| LYMPHOCYTES ABS<br>10 <sup>3</sup> /mcL   | N             | 5                    | 3     | 3     | 5                     | 5             | 3     | 3                     | 5     |  |
|                                           | Mean          | 2.75                 | 2.81  | 2.19  | 2.09+                 | 3.57          | 2.62  | 2.65                  | 2.22* |  |
|                                           | Sdev          | 0.126                | 0.400 | 0.263 | 0.545                 | 0.712         | 0.060 | 0.609                 | 0.375 |  |
| MONOCYTES ABS<br>10 <sup>3</sup> /mcL     | N             | 5                    | 3     | 3     | 5                     | 5             | 3     | 3                     | 5     |  |
|                                           | Mean          | 0.44                 | 0.23  | 0.25  | 0.32                  | 0.60          | 0.55  | 0.49                  | 0.30+ |  |
|                                           | Sdev          | 0.277                | 0.046 | 0.045 | 0.090                 | 0.212         | 0.105 | 0.123                 | 0.049 |  |
| Group 1:Vehicle                           |               | Group 2:50 mg/kg/day |       |       | Group 3:200 mg/kg/day |               |       | Group 4:800 mg/kg/day |       |  |

Group means without footnotes were not statistically different from the control at p=0.05 or p=0.01.

+ The group mean was significantly different from the control at p=0.05 with Dunnett's test of significance

\* The group mean was significantly different from the control at p=0.01 with Dunnett's test of significance

CONFIDENTIAL  
Table 5  
Day 28 Hematology Data  
Test period

Session 1 (Scheduled)  
Fexinidazole

Study Number: 0505-2007

| Parameter                                         | Group Number: | M a l e s            |       |       |                       | F e m a l e s |       |                       |       |  |
|---------------------------------------------------|---------------|----------------------|-------|-------|-----------------------|---------------|-------|-----------------------|-------|--|
|                                                   |               | 1                    | 2     | 3     | 4                     | 1             | 2     | 3                     | 4     |  |
| EOSINOPHILS ABS<br>10 <sup>3</sup> /mcL           | N             | 5                    | 3     | 3     | 5                     | 5             | 3     | 3                     | 5     |  |
|                                                   | Mean          | 0.16                 | 0.20  | 0.19  | 0.15                  | 0.22          | 0.44  | 0.16                  | 0.29  |  |
|                                                   | Sdev          | 0.023                | 0.058 | 0.055 | 0.187                 | 0.196         | 0.436 | 0.095                 | 0.263 |  |
| BASOPHILS ABS<br>10 <sup>3</sup> /mcL             | N             | 5                    | 3     | 3     | 5                     | 5             | 3     | 3                     | 5     |  |
|                                                   | Mean          | 0.04                 | 0.07* | 0.05  | 0.04                  | 0.06          | 0.07  | 0.07                  | 0.04  |  |
|                                                   | Sdev          | 0.013                | 0.015 | 0.006 | 0.013                 | 0.021         | 0.015 | 0.031                 | 0.007 |  |
| LARGE UNSTAINED CELLS ABS<br>10 <sup>3</sup> /mcL | N             | 5                    | 3     | 3     | 5                     | 5             | 3     | 3                     | 5     |  |
|                                                   | Mean          | 0.04                 | 0.05  | 0.05  | 0.04                  | 0.08          | 0.05  | 0.06                  | 0.06  |  |
|                                                   | Sdev          | 0.013                | 0.006 | 0.010 | 0.023                 | 0.021         | 0.010 | 0.044                 | 0.024 |  |
| NEUTROPHILS %                                     | N             | 5                    | 3     | 3     | 5                     | 5             | 3     | 3                     | 5     |  |
|                                                   | Mean          | 60.8                 | 56.3  | 64.6  | 65.5                  | 61.4          | 65.9  | 65.8                  | 62.9  |  |
|                                                   | Sdev          | 5.33                 | 2.87  | 6.99  | 10.31                 | 3.86          | 5.40  | 5.77                  | 5.60  |  |
| LYMPHOCITES %                                     | N             | 5                    | 3     | 3     | 5                     | 5             | 3     | 3                     | 5     |  |
|                                                   | Mean          | 31.8                 | 36.6  | 28.5  | 27.2                  | 30.6          | 24.1  | 26.5                  | 28.2  |  |
|                                                   | Sdev          | 6.05                 | 2.54  | 5.98  | 7.70                  | 3.54          | 4.03  | 5.00                  | 4.28  |  |
| MONOCYTES %                                       | N             | 5                    | 3     | 3     | 5                     | 5             | 3     | 3                     | 5     |  |
|                                                   | Mean          | 4.7                  | 3.0   | 3.2   | 4.2                   | 5.1           | 5.0   | 4.8                   | 3.8+  |  |
|                                                   | Sdev          | 1.91                 | 0.40  | 0.81  | 0.98                  | 0.88          | 0.25  | 0.72                  | 0.50  |  |
| EOSINOPHILS %                                     | N             | 5                    | 3     | 3     | 5                     | 5             | 3     | 3                     | 5     |  |
|                                                   | Mean          | 1.8                  | 2.5   | 2.3   | 2.1                   | 1.8           | 4.0   | 1.7                   | 3.8   |  |
|                                                   | Sdev          | 0.42                 | 0.40  | 0.51  | 2.91                  | 1.21          | 3.72  | 1.16                  | 3.62  |  |
| Group 1:Vehicle                                   |               | Group 2:50 mg/kg/day |       |       | Group 3:200 mg/kg/day |               |       | Group 4:800 mg/kg/day |       |  |

Group means without footnotes were not statistically different from the control at p=0.05 or p=0.01.

+ The group mean was significantly different from the control at p=0.05 with Dunnett's test of significance

\* The group mean was significantly different from the control at p=0.01 with Dunnett's test of significance

CONFIDENTIAL  
 Table 5  
 Day 28 Hematology Data  
 Test period

Session 1 (Scheduled)  
 Fexinidazole

Study Number: 0505-2007

| Parameter               | Group Number: | M a l e s            |      |      |                       | F e m a l e s |                       |      |      |
|-------------------------|---------------|----------------------|------|------|-----------------------|---------------|-----------------------|------|------|
|                         |               | 1                    | 2    | 3    | 4                     | 1             | 2                     | 3    | 4    |
| BASOPHILS %             | N             | 5                    | 3    | 3    | 5                     | 5             | 3                     | 3    | 5    |
|                         | Mean          | 0.4                  | 0.9* | 0.6  | 0.5                   | 0.5           | 0.6                   | 0.6  | 0.5  |
|                         | Sdev          | 0.10                 | 0.32 | 0.15 | 0.20                  | 0.23          | 0.10                  | 0.32 | 0.11 |
| LARGE UNSTAINED CELLS % | N             | 5                    | 3    | 3    | 5                     | 5             | 3                     | 3    | 5    |
|                         | Mean          | 0.5                  | 0.7  | 0.6  | 0.6                   | 0.6           | 0.5                   | 0.6  | 0.7  |
|                         | Sdev          | 0.04                 | 0.17 | 0.21 | 0.38                  | 0.15          | 0.06                  | 0.46 | 0.34 |
| Group 1:Vehicle         |               | Group 2:50 mg/kg/day |      |      | Group 3:200 mg/kg/day |               | Group 4:800 mg/kg/day |      |      |

Group means without footnotes were not statistically different from the control at p=0.05 or p=0.01.

\* The group mean was significantly different from the control at p=0.01 with Dunnett's test of significance

CONFIDENTIAL  
 Table 5  
 Day 42 Hematology Data  
 Test period

Session 1 (Scheduled)  
 Fexinidazole

Study Number: 0505-2007

| Parameter                               | Group Number: | M a l e s |   |   |       | F e m a l e s |   |   |       |
|-----------------------------------------|---------------|-----------|---|---|-------|---------------|---|---|-------|
|                                         |               | 1         | 2 | 3 | 4     | 1             | 2 | 3 | 4     |
| RED BLOOD CELLS<br>10 <sup>6</sup> /mcL | N             | 2         | 0 | 0 | 2     | 2             | 0 | 0 | 2     |
|                                         | Mean          | 5.95      | - | - | 6.50  | 6.80          | - | - | 6.57  |
|                                         | Sdev          | 0.092     | - | - | 0.537 | 0.085         | - | - | 0.042 |
| HEMOGLOBIN<br>g/dL                      | N             | 2         | 0 | 0 | 2     | 2             | 0 | 0 | 2     |
|                                         | Mean          | 13.1      | - | - | 14.4  | 15.3          | - | - | 14.5  |
|                                         | Sdev          | 0.71      | - | - | 1.13  | 0.42          | - | - | 0.35  |
| HEMATOCRIT<br>%                         | N             | 2         | 0 | 0 | 2     | 2             | 0 | 0 | 2     |
|                                         | Mean          | 40.0      | - | - | 43.8  | 45.2          | - | - | 43.2  |
|                                         | Sdev          | 0.57      | - | - | 3.11  | 1.34          | - | - | 1.77  |
| MEAN CORPUSCULAR VOLUME<br>fL           | N             | 2         | 0 | 0 | 2     | 2             | 0 | 0 | 2     |
|                                         | Mean          | 67.3      | - | - | 67.4  | 66.4          | - | - | 65.6  |
|                                         | Sdev          | 0.07      | - | - | 0.71  | 1.06          | - | - | 2.40  |
| MEAN CORPUSCULAR HEMOGLOBIN<br>pg       | N             | 2         | 0 | 0 | 2     | 2             | 0 | 0 | 2     |
|                                         | Mean          | 22.1      | - | - | 22.1  | 22.5          | - | - | 22.0  |
|                                         | Sdev          | 0.78      | - | - | 0.00  | 0.28          | - | - | 0.42  |
| MEAN CORPUSCULAR HGB CONC.<br>g/dL      | N             | 2         | 0 | 0 | 2     | 2             | 0 | 0 | 2     |
|                                         | Mean          | 32.8      | - | - | 32.8  | 33.9          | - | - | 33.6  |
|                                         | Sdev          | 1.27      | - | - | 0.28  | 0.14          | - | - | 0.49  |
| RED CELL DISTRIBUTION WIDTH<br>%        | N             | 2         | 0 | 0 | 2     | 2             | 0 | 0 | 2     |
|                                         | Mean          | 12.8      | - | - | 12.8  | 11.4          | - | - | 12.0  |
|                                         | Sdev          | 0.07      | - | - | 0.42  | 0.57          | - | - | 0.00  |

Group 1: Vehicle                      Group 2: 50 mg/kg/day                      Group 3: 200 mg/kg/day                      Group 4: 800 mg/kg/day

Group means without footnotes were not statistically different from the control at p=0.05 or p=0.01.

CONFIDENTIAL  
Table 5  
Day 42 Hematology Data  
Test period

Session 1 (Scheduled)  
Fexinidazole

Study Number: 0505-2007

| Parameter                               | Group Number: | M a l e s |   |   |       | F e m a l e s |   |   |       |
|-----------------------------------------|---------------|-----------|---|---|-------|---------------|---|---|-------|
|                                         |               | 1         | 2 | 3 | 4     | 1             | 2 | 3 | 4     |
| HEMOGLOBIN DISTRIB. WIDTH<br>g/dL       | N             | 2         | 0 | 0 | 2     | 2             | 0 | 0 | 2     |
|                                         | Mean          | 1.78      | - | - | 1.97  | 1.65          | - | - | 1.75  |
|                                         | Sdev          | 0.021     | - | - | 0.085 | 0.092         | - | - | 0.049 |
| RETICULOCYTES<br>%                      | N             | 2         | 0 | 0 | 2     | 2             | 0 | 0 | 2     |
|                                         | Mean          | 1.0       | - | - | 1.2   | 0.4           | - | - | 0.7   |
|                                         | Sdev          | 0.64      | - | - | 0.29  | 0.21          | - | - | 0.23  |
| RETICULOCYTES ABS<br>10 <sup>9</sup> /L | N             | 2         | 0 | 0 | 2     | 2             | 0 | 0 | 2     |
|                                         | Mean          | 59.5      | - | - | 77.7  | 24.4          | - | - | 43.3  |
|                                         | Sdev          | 37.69     | - | - | 12.45 | 14.42         | - | - | 14.42 |
| MEAN CORPUSCOLAR VOL. RETIC.<br>fL      | N             | 2         | 0 | 0 | 2     | 2             | 0 | 0 | 2     |
|                                         | Mean          | 91.4      | - | - | 88.3  | 85.5          | - | - | 88.1  |
|                                         | Sdev          | 3.04      | - | - | 0.21  | 1.98          | - | - | 3.25  |
| MEAN HEMOGLOBIN CONC. RETIC.<br>g/dL    | N             | 2         | 0 | 0 | 2     | 2             | 0 | 0 | 2     |
|                                         | Mean          | 27.7      | - | - | 27.9  | 29.2          | - | - | 28.7  |
|                                         | Sdev          | 0.28      | - | - | 0.28  | 0.35          | - | - | 0.42  |
| CELLULAR HEMOGLOBIN RETIC.<br>pg        | N             | 2         | 0 | 0 | 2     | 2             | 0 | 0 | 2     |
|                                         | Mean          | 25.3      | - | - | 24.6  | 24.8          | - | - | 25.2  |
|                                         | Sdev          | 0.64      | - | - | 0.21  | 0.28          | - | - | 1.27  |
| PLATELETS<br>10 <sup>3</sup> /mcL       | N             | 2         | 0 | 0 | 2     | 2             | 0 | 0 | 2     |
|                                         | Mean          | 421.      | - | - | 336.  | 381.          | - | - | 334.  |
|                                         | Sdev          | 26.9      | - | - | 113.8 | 108.9         | - | - | 2.1   |

Group 1:Vehicle

Group 2:50 mg/kg/day

Group 3:200 mg/kg/day

Group 4:800 mg/kg/day

Group means without footnotes were not statistically different from the control at p=0.05 or p=0.01.



CONFIDENTIAL  
Table 5  
Day 42 Hematology Data  
Test period

Session 1 (Scheduled)  
Fexinidazole

Study Number: 0505-2007

| Parameter                                 | Group Number: | M a l e s |   |   |       | F e m a l e s |   |   |       |
|-------------------------------------------|---------------|-----------|---|---|-------|---------------|---|---|-------|
|                                           |               | 1         | 2 | 3 | 4     | 1             | 2 | 3 | 4     |
| MEAN PLATELET VOLUME<br>fL                | N             | 2         | 0 | 0 | 2     | 2             | 0 | 0 | 2     |
|                                           | Mean          | 10.0      | - | - | 9.7   | 9.0           | - | - | 9.0   |
|                                           | Sdev          | 1.20      | - | - | 1.70  | 0.07          | - | - | 0.07  |
| PLATELET DISTRIBUTION WIDTH<br>%          | N             | 2         | 0 | 0 | 2     | 2             | 0 | 0 | 2     |
|                                           | Mean          | 55.8      | - | - | 59.8  | 50.9          | - | - | 55.0  |
|                                           | Sdev          | 2.19      | - | - | 1.13  | 1.13          | - | - | 0.99  |
| PLATELET HEMATOCRIT<br>%                  | N             | 2         | 0 | 0 | 2     | 2             | 0 | 0 | 2     |
|                                           | Mean          | 0.42      | - | - | 0.34  | 0.34          | - | - | 0.30  |
|                                           | Sdev          | 0.021     | - | - | 0.170 | 0.099         | - | - | 0.000 |
| WHITE BLOOD CELLS<br>10 <sup>3</sup> /mcL | N             | 2         | 0 | 0 | 2     | 2             | 0 | 0 | 2     |
|                                           | Mean          | 8.72      | - | - | 6.63  | 9.51          | - | - | 7.61  |
|                                           | Sdev          | 1.103     | - | - | 1.393 | 2.220         | - | - | 0.898 |
| NEUTROPHILS ABS<br>10 <sup>3</sup> /mcL   | N             | 2         | 0 | 0 | 2     | 2             | 0 | 0 | 2     |
|                                           | Mean          | 5.12      | - | - | 3.60  | 4.87          | - | - | 4.59  |
|                                           | Sdev          | 0.990     | - | - | 1.287 | 1.513         | - | - | 0.403 |
| LYMPHOCYTES ABS<br>10 <sup>3</sup> /mcL   | N             | 2         | 0 | 0 | 2     | 2             | 0 | 0 | 2     |
|                                           | Mean          | 2.98      | - | - | 2.58  | 3.47          | - | - | 2.44  |
|                                           | Sdev          | 0.014     | - | - | 0.163 | 0.219         | - | - | 0.410 |
| MONOCYTES ABS<br>10 <sup>3</sup> /mcL     | N             | 2         | 0 | 0 | 2     | 2             | 0 | 0 | 2     |
|                                           | Mean          | 0.42      | - | - | 0.28  | 0.60          | - | - | 0.29  |
|                                           | Sdev          | 0.049     | - | - | 0.021 | 0.134         | - | - | 0.014 |

Group 1: Vehicle

Group 2: 50 mg/kg/day

Group 3: 200 mg/kg/day

Group 4: 800 mg/kg/day

Group means without footnotes were not statistically different from the control at p=0.05 or p=0.01.

CONFIDENTIAL  
Table 5  
Day 42 Hematology Data  
Test period

Session 1 (Scheduled)  
Fexinidazole

Study Number: 0505-2007

| Parameter                                         | Group Number: | M a l e s |   |   |       | F e m a l e s |   |   |       |
|---------------------------------------------------|---------------|-----------|---|---|-------|---------------|---|---|-------|
|                                                   |               | 1         | 2 | 3 | 4     | 1             | 2 | 3 | 4     |
| EOSINOPHILS ABS<br>10 <sup>3</sup> /mcL           | N             | 2         | 0 | 0 | 2     | 2             | 0 | 0 | 2     |
|                                                   | Mean          | 0.15      | - | - | 0.08  | 0.44          | - | - | 0.17  |
|                                                   | Sdev          | 0.113     | - | - | 0.021 | 0.318         | - | - | 0.042 |
| BASOPHILS ABS<br>10 <sup>3</sup> /mcL             | N             | 2         | 0 | 0 | 2     | 2             | 0 | 0 | 2     |
|                                                   | Mean          | 0.03      | - | - | 0.06  | 0.08          | - | - | 0.07  |
|                                                   | Sdev          | 0.021     | - | - | 0.014 | 0.014         | - | - | 0.007 |
| LARGE UNSTAINED CELLS ABS<br>10 <sup>3</sup> /mcL | N             | 2         | 0 | 0 | 2     | 2             | 0 | 0 | 2     |
|                                                   | Mean          | 0.04      | - | - | 0.04  | 0.07          | - | - | 0.06  |
|                                                   | Sdev          | 0.014     | - | - | 0.007 | 0.028         | - | - | 0.014 |
| NEUTROPHILS %<br>%                                | N             | 2         | 0 | 0 | 2     | 2             | 0 | 0 | 2     |
|                                                   | Mean          | 58.4      | - | - | 53.5  | 50.7          | - | - | 60.4  |
|                                                   | Sdev          | 3.96      | - | - | 8.20  | 4.10          | - | - | 1.84  |
| LYMPHOCITES %<br>%                                | N             | 2         | 0 | 0 | 2     | 2             | 0 | 0 | 2     |
|                                                   | Mean          | 34.5      | - | - | 39.5  | 37.2          | - | - | 32.0  |
|                                                   | Sdev          | 4.45      | - | - | 5.87  | 6.43          | - | - | 1.70  |
| MONOCYTES %<br>%                                  | N             | 2         | 0 | 0 | 2     | 2             | 0 | 0 | 2     |
|                                                   | Mean          | 4.7       | - | - | 4.4   | 6.3           | - | - | 3.8*  |
|                                                   | Sdev          | 0.00      | - | - | 1.20  | 0.00          | - | - | 0.28  |
| EOSINOPHILS %<br>%                                | N             | 2         | 0 | 0 | 2     | 2             | 0 | 0 | 2     |
|                                                   | Mean          | 1.6       | - | - | 1.2   | 4.3           | - | - | 2.3   |
|                                                   | Sdev          | 1.13      | - | - | 0.57  | 2.40          | - | - | 0.21  |

Group 1: Vehicle

Group 2: 50 mg/kg/day

Group 3: 200 mg/kg/day

Group 4: 800 mg/kg/day

Group means without footnotes were not statistically different from the control at p=0.05 or p=0.01.

\* The group mean was significantly different from the control at p=0.01 with Dunnett's test of significance

CONFIDENTIAL  
 Table 5  
 Day 42 Hematology Data  
 Test period

Session 1 (Scheduled)  
 Fexinidazole

Study Number: 0505-2007

| Parameter               | Group Number: | M a l e s            |   |   |                       | F e m a l e s |   |                       |      |  |
|-------------------------|---------------|----------------------|---|---|-----------------------|---------------|---|-----------------------|------|--|
|                         |               | 1                    | 2 | 3 | 4                     | 1             | 2 | 3                     | 4    |  |
| BASOPHILS %             | N             | 2                    | 0 | 0 | 2                     | 2             | 0 | 0                     | 2    |  |
|                         | Mean          | 0.3                  | - | - | 1.0                   | 0.9           | - | -                     | 0.9  |  |
|                         | Sdev          | 0.28                 | - | - | 0.35                  | 0.07          | - | -                     | 0.07 |  |
| LARGE UNSTAINED CELLS % | N             | 2                    | 0 | 0 | 2                     | 2             | 0 | 0                     | 2    |  |
|                         | Mean          | 0.5                  | - | - | 0.6                   | 0.8           | - | -                     | 0.8  |  |
|                         | Sdev          | 0.28                 | - | - | 0.28                  | 0.07          | - | -                     | 0.07 |  |
| Group 1:Vehicle         |               | Group 2:50 mg/kg/day |   |   | Group 3:200 mg/kg/day |               |   | Group 4:800 mg/kg/day |      |  |

Group means without footnotes were not statistically different from the control at p=0.05 or p=0.01.

***Table 6 Coagulation***

CONFIDENTIAL

Table 6  
Day -7 Hematology Data  
Pretest phase

Session 1 (Scheduled)  
Fexinidazole

Study Number: 0505-2007

| Parameter                             | Group Number: | M a l e s            |      |      |                       | F e m a l e s |      |                       |      |  |
|---------------------------------------|---------------|----------------------|------|------|-----------------------|---------------|------|-----------------------|------|--|
|                                       |               | 1                    | 2    | 3    | 4                     | 1             | 2    | 3                     | 4    |  |
| PROTHROMBIN TIME<br>sec               | N             | 5                    | 3    | 3    | 5                     | 5             | 3    | 3                     | 5    |  |
|                                       | Mean          | 7.2                  | 7.6  | 7.2  | 7.4                   | 7.8           | 7.7  | 7.2                   | 7.8  |  |
|                                       | Sdev          | 0.46                 | 0.36 | 0.31 | 0.46                  | 0.99          | 0.99 | 0.15                  | 0.75 |  |
| PROTHROMBIN TIME RATIO<br>ratio       | N             | 5                    | 3    | 3    | 5                     | 5             | 3    | 3                     | 5    |  |
|                                       | Mean          | 1.0                  | 1.0  | 1.0  | 1.0                   | 1.1           | 1.1  | 1.0                   | 1.1  |  |
|                                       | Sdev          | 0.06                 | 0.05 | 0.04 | 0.06                  | 0.14          | 0.14 | 0.02                  | 0.10 |  |
| ACT. PAR. THROMB. TIME<br>sec         | N             | 5                    | 3    | 3    | 5                     | 5             | 3    | 3                     | 5    |  |
|                                       | Mean          | 12.5                 | 12.8 | 12.7 | 12.6                  | 24.2          | 12.6 | 12.8                  | 12.9 |  |
|                                       | Sdev          | 0.23                 | 0.31 | 0.18 | 0.37                  | 25.44         | 0.31 | 0.24                  | 0.47 |  |
| ACT. PAR. THROMB. TIME RATIO<br>ratio | N             | 5                    | 3    | 3    | 5                     | 5             | 3    | 3                     | 5    |  |
|                                       | Mean          | 1.0                  | 1.0  | 1.0  | 1.0                   | 1.9           | 1.0  | 1.0                   | 1.0  |  |
|                                       | Sdev          | 0.02                 | 0.03 | 0.01 | 0.03                  | 2.01          | 0.02 | 0.02                  | 0.04 |  |
| FIBRINOGEN<br>mg/dL                   | N             | 5                    | 3    | 3    | 5                     | 5             | 3    | 3                     | 5    |  |
|                                       | Mean          | 209.                 | 171. | 196. | 209.                  | 183.          | 188. | 215.                  | 166. |  |
|                                       | Sdev          | 17.3                 | 14.8 | 45.2 | 29.2                  | 22.0          | 50.2 | 43.0                  | 23.5 |  |
| Group 1:Vehicle                       |               | Group 2:50 mg/kg/day |      |      | Group 3:200 mg/kg/day |               |      | Group 4:800 mg/kg/day |      |  |

Group means without footnotes were not statistically different from the control at p=0.05 or p=0.01.

CONFIDENTIAL  
Table 6  
Day 28 Hematology Data  
Test period

Session 1 (Scheduled)  
Fexinidazole

Study Number: 0505-2007

| Parameter                          | Group Number: | M a l e s |       |      |       | F e m a l e s |      |      |      |
|------------------------------------|---------------|-----------|-------|------|-------|---------------|------|------|------|
|                                    |               | 1         | 2     | 3    | 4     | 1             | 2    | 3    | 4    |
| PROTHROMBIN TIME<br>sec            | N             | 5         | 3     | 3    | 5     | 5             | 3    | 3    | 5    |
|                                    | Mean          | 7.2       | 8.0   | 7.4  | 7.7   | 7.4           | 7.4  | 7.2  | 7.6  |
|                                    | Sdev          | 0.29      | 0.34  | 0.87 | 0.56  | 0.34          | 0.49 | 0.31 | 0.52 |
| PROTHROMBIN TIME RATIO<br>ratio    | N             | 5         | 3     | 3    | 5     | 5             | 3    | 3    | 5    |
|                                    | Mean          | 1.0       | 1.1   | 1.0  | 1.1   | 1.0           | 1.0  | 1.0  | 1.0  |
|                                    | Sdev          | 0.04      | 0.05  | 0.12 | 0.08  | 0.05          | 0.07 | 0.04 | 0.07 |
| ACT. PAR. THROMB. TIME<br>sec      | N             | 5         | 3     | 3    | 5     | 5             | 3    | 3    | 5    |
|                                    | Mean          | 12.4      | 13.1+ | 12.7 | 12.6  | 12.9          | 12.5 | 12.5 | 12.7 |
|                                    | Sdev          | 0.19      | 0.40  | 0.29 | 0.32  | 0.52          | 0.10 | 0.06 | 0.10 |
| ACT.PAR.THROMB.TIME RATIO<br>ratio | N             | 5         | 3     | 3    | 5     | 5             | 3    | 3    | 5    |
|                                    | Mean          | 1.0       | 1.0+  | 1.0  | 1.0   | 1.0           | 1.0  | 1.0  | 1.0  |
|                                    | Sdev          | 0.01      | 0.03  | 0.03 | 0.03  | 0.04          | 0.01 | 0.01 | 0.01 |
| FIBRINOGEN<br>mg/dL                | N             | 5         | 3     | 3    | 5     | 5             | 3    | 3    | 5    |
|                                    | Mean          | 220.      | 164.+ | 216. | 173.+ | 188.          | 194. | 213. | 184. |
|                                    | Sdev          | 14.3      | 9.3   | 57.0 | 17.9  | 26.8          | 15.3 | 60.8 | 25.9 |

Group 1:Vehicle                      Group 2:50 mg/kg/day                      Group 3:200 mg/kg/day                      Group 4:800 mg/kg/day

Group means without footnotes were not statistically different from the control at p=0.05 or p=0.01.  
+ The group mean was significantly different from the control at p=0.05 with Dunnett's test of significance

CONFIDENTIAL  
 Table 6  
 Day 42 Hematology Data  
 Test period

Session 1 (Scheduled)  
 Fexinidazole

Study Number: 0505-2007

| Parameter                          | Group Number: | M a l e s |   |   |      | F e m a l e s |   |   |      |
|------------------------------------|---------------|-----------|---|---|------|---------------|---|---|------|
|                                    |               | 1         | 2 | 3 | 4    | 1             | 2 | 3 | 4    |
| PROTHROMBIN TIME<br>sec            | N             | 2         | 0 | 0 | 2    | 2             | 0 | 0 | 2    |
|                                    | Mean          | 7.8       | - | - | 7.9  | 7.5           | - | - | 7.6  |
|                                    | Sdev          | 0.74      | - | - | 0.05 | 0.17          | - | - | 0.59 |
| PROTHROMBIN TIME RATIO<br>ratio    | N             | 2         | 0 | 0 | 2    | 2             | 0 | 0 | 2    |
|                                    | Mean          | 1.1       | - | - | 1.1  | 1.0           | - | - | 1.0  |
|                                    | Sdev          | 0.10      | - | - | 0.01 | 0.03          | - | - | 0.08 |
| ACT. PAR. THROMB. TIME<br>sec      | N             | 2         | 0 | 0 | 2    | 2             | 0 | 0 | 2    |
|                                    | Mean          | 12.6      | - | - | 12.4 | 12.4          | - | - | 12.3 |
|                                    | Sdev          | 0.28      | - | - | 0.28 | 0.06          | - | - | 0.24 |
| ACT.PAR.THROMB.TIME RATIO<br>ratio | N             | 2         | 0 | 0 | 2    | 2             | 0 | 0 | 2    |
|                                    | Mean          | 1.0       | - | - | 1.0  | 1.0           | - | - | 1.0  |
|                                    | Sdev          | 0.02      | - | - | 0.03 | 0.00          | - | - | 0.02 |
| FIBRINOGEN<br>mg/dL                | N             | 2         | 0 | 0 | 2    | 2             | 0 | 0 | 2    |
|                                    | Mean          | 215.      | - | - | 190. | 167.          | - | - | 188. |
|                                    | Sdev          | 11.0      | - | - | 35.6 | 0.4           | - | - | 19.6 |

Group 1:Vehicle                      Group 2:50 mg/kg/day                      Group 3:200 mg/kg/day                      Group 4:800 mg/kg/day

Group means without footnotes were not statistically different from the control at p=0.05 or p=0.01.

***Table 7 Clinical Chemistry***



CONFIDENTIAL

Table 7  
Day -7 Clinical Chemistry Data  
Pretest phase

Session 1 (Scheduled)  
Fexinidazole

Study Number: 0505-2007

| Parameter                           | Group Number:        | M a l e s             |       |       |                       | F e m a l e s |       |       |       |
|-------------------------------------|----------------------|-----------------------|-------|-------|-----------------------|---------------|-------|-------|-------|
|                                     |                      | 1                     | 2     | 3     | 4                     | 1             | 2     | 3     | 4     |
| UREA<br>mg/dL                       | N                    | 5                     | 3     | 3     | 5                     | 5             | 3     | 3     | 5     |
|                                     | Mean                 | 30.                   | 21.+  | 23.   | 24.                   | 26.           | 31.   | 28.   | 31.   |
|                                     | Sdev                 | 5.4                   | 2.6   | 1.7   | 3.1                   | 2.8           | 5.6   | 4.7   | 8.6   |
| CREATININE<br>mg/dL                 | N                    | 5                     | 3     | 3     | 5                     | 5             | 3     | 3     | 5     |
|                                     | Mean                 | 0.91                  | 0.87  | 0.86  | 0.87                  | 0.82          | 0.84  | 0.77  | 0.89  |
|                                     | Sdev                 | 0.067                 | 0.065 | 0.042 | 0.049                 | 0.113         | 0.047 | 0.035 | 0.084 |
| ASPARTATE AMINO TRANSFERASE<br>IU/L | N                    | 5                     | 3     | 3     | 5                     | 5             | 3     | 3     | 5     |
|                                     | Mean                 | 39.                   | 33.   | 35.   | 38.                   | 41.           | 37.   | 36.   | 34.   |
|                                     | Sdev                 | 8.4                   | 5.5   | 10.5  | 8.0                   | 7.8           | 4.6   | 7.0   | 5.1   |
| ALANINE AMINO TRANSFERASE<br>IU/L   | N                    | 5                     | 3     | 3     | 5                     | 5             | 3     | 3     | 5     |
|                                     | Mean                 | 33.                   | 30.   | 31.   | 32.                   | 29.           | 29.   | 23.   | 30.   |
|                                     | Sdev                 | 8.5                   | 0.6   | 8.1   | 6.1                   | 2.5           | 9.0   | 2.1   | 7.0   |
| ALKALINE PHOSPHATASE<br>IU/L        | N                    | 5                     | 3     | 3     | 5                     | 5             | 3     | 3     | 5     |
|                                     | Mean                 | 78.                   | 78.   | 78.   | 73.                   | 57.           | 70.   | 68.   | 62.   |
|                                     | Sdev                 | 23.0                  | 10.1  | 23.5  | 16.8                  | 16.7          | 13.6  | 14.8  | 21.0  |
| GAMMA GLUTAMYL TRANSFERASE<br>IU/L  | N                    | 5                     | 3     | 3     | 5                     | 5             | 3     | 3     | 5     |
|                                     | Mean                 | 6.                    | 8.    | 8.    | 7.                    | 8.            | 10.   | 7.    | 8.    |
|                                     | Sdev                 | 1.1                   | 1.5   | 3.0   | 1.8                   | 1.9           | 1.5   | 0.6   | 0.4   |
| TOTAL BILIRUBIN<br>mg/dL            | N                    | 5                     | 3     | 3     | 5                     | 5             | 3     | 3     | 5     |
|                                     | Mean                 | 0.10                  | 0.12  | 0.15  | 0.09                  | 0.14          | 0.14  | 0.12  | 0.16  |
|                                     | Sdev                 | 0.020                 | 0.023 | 0.078 | 0.005                 | 0.060         | 0.061 | 0.006 | 0.041 |
| Group 1:Vehicle                     | Group 2:50 mg/kg/day | Group 3:200 mg/kg/day |       |       | Group 4:800 mg/kg/day |               |       |       |       |

Group means without footnotes were not statistically different from the control at p=0.05 or p=0.01.

+ The group mean was significantly different from the control at p=0.05 with Dunnett's test of significance

CONFIDENTIAL

Table 7  
Day -7 Clinical Chemistry Data  
Pretest phase

Session 1 (Scheduled)  
Fexinidazole

Study Number: 0505-2007

| Parameter                  | Group Number: | M a l e s |       |       |       | F e m a l e s |       |       |       |
|----------------------------|---------------|-----------|-------|-------|-------|---------------|-------|-------|-------|
|                            |               | 1         | 2     | 3     | 4     | 1             | 2     | 3     | 4     |
| TOTAL PROTEIN<br>g/dL      | N             | 5         | 3     | 3     | 5     | 5             | 3     | 3     | 5     |
|                            | Mean          | 5.9       | 5.8   | 6.1   | 6.2   | 5.8           | 5.8   | 5.9   | 5.9   |
|                            | Sdev          | 0.22      | 0.25  | 0.00  | 0.30  | 0.24          | 0.00  | 0.21  | 0.21  |
| ALBUMIN<br>g/dL            | N             | 5         | 3     | 3     | 5     | 5             | 3     | 3     | 5     |
|                            | Mean          | 2.80      | 2.95  | 2.84  | 2.95  | 2.87          | 2.88  | 2.92  | 2.90  |
|                            | Sdev          | 0.152     | 0.104 | 0.254 | 0.125 | 0.175         | 0.268 | 0.156 | 0.127 |
| GLOBULIN<br>g/dL           | N             | 5         | 3     | 3     | 5     | 5             | 3     | 3     | 5     |
|                            | Mean          | 3.1       | 2.9   | 3.3   | 3.2   | 2.9           | 2.9   | 3.0   | 3.0   |
|                            | Sdev          | 0.23      | 0.17  | 0.25  | 0.20  | 0.30          | 0.27  | 0.16  | 0.30  |
| GLUCOSE<br>mg/dL           | N             | 5         | 3     | 3     | 5     | 5             | 3     | 3     | 5     |
|                            | Mean          | 87.       | 91.   | 92.   | 94.   | 96.           | 88.   | 98.   | 100.  |
|                            | Sdev          | 1.9       | 5.0   | 3.0   | 9.4   | 14.6          | 19.6  | 11.9  | 6.3   |
| TRIGLYCERIDES<br>mg/dL     | N             | 5         | 3     | 3     | 5     | 5             | 3     | 3     | 5     |
|                            | Mean          | 18.       | 22.   | 18.   | 14.   | 14.           | 30.+  | 22.   | 21.   |
|                            | Sdev          | 5.8       | 13.6  | 4.0   | 5.2   | 3.7           | 10.6  | 5.6   | 7.3   |
| TOTAL CHOLESTEROL<br>mg/dL | N             | 5         | 3     | 3     | 5     | 5             | 3     | 3     | 5     |
|                            | Mean          | 124.      | 125.  | 122.  | 117.  | 112.          | 136.  | 131.+ | 135.  |
|                            | Sdev          | 20.9      | 25.2  | 12.5  | 20.8  | 10.6          | 29.6  | 2.3   | 21.8  |
| CALCIUM<br>mg/dL           | N             | 5         | 3     | 3     | 5     | 5             | 3     | 3     | 5     |
|                            | Mean          | 10.8      | 10.6  | 10.8  | 10.7  | 10.4          | 10.7  | 10.6  | 10.9+ |
|                            | Sdev          | 0.45      | 0.40  | 0.67  | 0.36  | 0.22          | 0.00  | 0.32  | 0.23  |

Group 1:Vehicle

Group 2:50 mg/kg/day

Group 3:200 mg/kg/day

Group 4:800 mg/kg/day

Group means without footnotes were not statistically different from the control at p=0.05 or p=0.01.

+ The group mean was significantly different from the control at p=0.05 with Dunnett's test of significance

**CONFIDENTIAL**

Table 7  
Day -7 Clinical Chemistry Data  
Pretest phase

Session 1 (Scheduled)  
Fexinidazole

Study Number: 0505-2007

| Parameter            | Group Number: | M a l e s            |       |       |                       | F e m a l e s |       |                       |       |  |
|----------------------|---------------|----------------------|-------|-------|-----------------------|---------------|-------|-----------------------|-------|--|
|                      |               | 1                    | 2     | 3     | 4                     | 1             | 2     | 3                     | 4     |  |
| PHOSPHOROUS<br>mg/dL | N             | 5                    | 3     | 3     | 5                     | 5             | 3     | 3                     | 5     |  |
|                      | Mean          | 5.0                  | 4.8   | 4.2+  | 4.7                   | 4.4           | 4.9   | 4.6                   | 4.5   |  |
|                      | Sdev          | 0.37                 | 0.32  | 0.38  | 0.42                  | 0.59          | 0.15  | 0.17                  | 0.84  |  |
| ALBUMIN/GLOBULIN     | N             | 5                    | 3     | 3     | 5                     | 5             | 3     | 3                     | 5     |  |
|                      | Mean          | 0.9                  | 1.0   | 0.9   | 0.9                   | 1.0           | 1.0   | 1.0                   | 1.0   |  |
|                      | Sdev          | 0.09                 | 0.04  | 0.15  | 0.04                  | 0.14          | 0.18  | 0.08                  | 0.14  |  |
| SODIUM<br>mEq/L      | N             | 5                    | 3     | 3     | 5                     | 5             | 3     | 3                     | 5     |  |
|                      | Mean          | 141.2                | 142.3 | 141.7 | 141.4                 | 141.8         | 142.7 | 142.0                 | 143.0 |  |
|                      | Sdev          | 1.30                 | 0.58  | 2.31  | 0.89                  | 1.79          | 1.15  | 2.00                  | 1.00  |  |
| POTASSIUM<br>mEq/L   | N             | 5                    | 3     | 3     | 5                     | 5             | 3     | 3                     | 5     |  |
|                      | Mean          | 4.7                  | 4.7   | 4.6   | 4.6                   | 4.3           | 4.7   | 4.4                   | 4.4   |  |
|                      | Sdev          | 0.18                 | 0.25  | 0.08  | 0.14                  | 0.20          | 0.10  | 0.27                  | 0.16  |  |
| CHLORIDE<br>mEq/L    | N             | 5                    | 3     | 3     | 5                     | 5             | 3     | 3                     | 5     |  |
|                      | Mean          | 109.2                | 109.0 | 110.0 | 109.8                 | 108.0         | 106.0 | 108.0                 | 106.4 |  |
|                      | Sdev          | 1.48                 | 1.00  | 3.46  | 2.17                  | 1.58          | 1.00  | 1.00                  | 3.05  |  |
| Group 1:Vehicle      |               | Group 2:50 mg/kg/day |       |       | Group 3:200 mg/kg/day |               |       | Group 4:800 mg/kg/day |       |  |

Group means without footnotes were not statistically different from the control at p=0.05 or p=0.01.

+ The group mean was significantly different from the control at p=0.05 with Dunnett's test of significance

CONFIDENTIAL

Table 7  
Day 28 Clinical Chemistry Data  
Test period

Session 1 (Scheduled)  
Fexinidazole

Study Number: 0505-2007

| Parameter                           | Group Number: | M a l e s |       |       |       | F e m a l e s |       |       |       |
|-------------------------------------|---------------|-----------|-------|-------|-------|---------------|-------|-------|-------|
|                                     |               | 1         | 2     | 3     | 4     | 1             | 2     | 3     | 4     |
| UREA<br>mg/dL                       | N             | 5         | 3     | 3     | 5     | 5             | 3     | 3     | 5     |
|                                     | Mean          | 30.       | 24.+  | 27.   | 33.   | 23.           | 27.   | 27.   | 32.   |
|                                     | Sdev          | 1.5       | 1.7   | 6.2   | 6.7   | 1.9           | 4.6   | 4.0   | 11.1  |
| CREATININE<br>mg/dL                 | N             | 5         | 3     | 3     | 5     | 5             | 3     | 3     | 5     |
|                                     | Mean          | 0.90      | 0.87  | 0.85  | 0.93  | 0.89          | 0.89  | 0.84  | 0.93  |
|                                     | Sdev          | 0.058     | 0.015 | 0.104 | 0.107 | 0.070         | 0.012 | 0.035 | 0.079 |
| ASPARTATE AMINO TRANSFERASE<br>IU/L | N             | 5         | 3     | 3     | 5     | 5             | 3     | 3     | 5     |
|                                     | Mean          | 37.       | 33.   | 31.   | 31.   | 35.           | 34.   | 40.   | 29.   |
|                                     | Sdev          | 6.6       | 2.0   | 7.5   | 6.4   | 6.2           | 4.6   | 6.5   | 4.3   |
| ALANINE AMINO TRANSFERASE<br>IU/L   | N             | 5         | 3     | 3     | 5     | 5             | 3     | 3     | 5     |
|                                     | Mean          | 41.       | 34.   | 30.   | 36.   | 35.           | 34.   | 29.   | 39.   |
|                                     | Sdev          | 12.8      | 7.2   | 2.5   | 9.0   | 1.9           | 8.1   | 6.0   | 17.4  |
| ALKALINE PHOSPHATASE<br>IU/L        | N             | 5         | 3     | 3     | 5     | 5             | 3     | 3     | 5     |
|                                     | Mean          | 68.       | 76.   | 82.   | 100.  | 65.           | 75.   | 78.   | 74.   |
|                                     | Sdev          | 8.7       | 12.1  | 19.2  | 33.8  | 17.2          | 17.0  | 18.0  | 17.6  |
| GAMMA GLUTAMYL TRANSFERASE<br>IU/L  | N             | 5         | 3     | 3     | 5     | 5             | 3     | 3     | 5     |
|                                     | Mean          | 4.        | 5.    | 6.    | 8.*   | 4.            | 6.    | 7.+   | 7.*   |
|                                     | Sdev          | 1.8       | 0.6   | 0.6   | 2.5   | 1.0           | 1.5   | 1.0   | 1.1   |
| TOTAL BILIRUBIN<br>mg/dL            | N             | 5         | 3     | 3     | 5     | 5             | 3     | 3     | 5     |
|                                     | Mean          | 0.25      | 0.25  | 0.24  | 0.27  | 0.13          | 0.14  | 0.11  | 0.18  |
|                                     | Sdev          | 0.034     | 0.036 | 0.021 | 0.051 | 0.053         | 0.064 | 0.006 | 0.088 |

Group 1:Vehicle

Group 2:50 mg/kg/day

Group 3:200 mg/kg/day

Group 4:800 mg/kg/day

Group means without footnotes were not statistically different from the control at p=0.05 or p=0.01.

+ The group mean was significantly different from the control at p=0.05 with Dunnett's test of significance

\* The group mean was significantly different from the control at p=0.01 with Dunnett's test of significance

**CONFIDENTIAL**

Table 7  
Day 28 Clinical Chemistry Data  
Test period

Session 1 (Scheduled)  
Fexinidazole

Study Number: 0505-2007

| Parameter                  | Group Number: | M a l e s |       |       |       | F e m a l e s |       |       |       |
|----------------------------|---------------|-----------|-------|-------|-------|---------------|-------|-------|-------|
|                            |               | 1         | 2     | 3     | 4     | 1             | 2     | 3     | 4     |
| TOTAL PROTEIN<br>g/dL      | N             | 5         | 3     | 3     | 5     | 5             | 3     | 3     | 5     |
|                            | Mean          | 5.4       | 5.4   | 5.3   | 5.4   | 5.6           | 5.5   | 5.4   | 5.6   |
|                            | Sdev          | 0.28      | 0.17  | 0.31  | 0.15  | 0.25          | 0.26  | 0.12  | 0.34  |
| ALBUMIN<br>g/dL            | N             | 5         | 3     | 3     | 5     | 5             | 3     | 3     | 5     |
|                            | Mean          | 2.74      | 2.95  | 2.75  | 2.88  | 2.85          | 2.89  | 2.86  | 2.96  |
|                            | Sdev          | 0.205     | 0.095 | 0.361 | 0.157 | 0.187         | 0.193 | 0.125 | 0.124 |
| GLOBULIN<br>g/dL           | N             | 5         | 3     | 3     | 5     | 5             | 3     | 3     | 5     |
|                            | Mean          | 2.6       | 2.5   | 2.6   | 2.5   | 2.7           | 2.6   | 2.6   | 2.7   |
|                            | Sdev          | 0.13      | 0.11  | 0.21  | 0.10  | 0.32          | 0.08  | 0.02  | 0.29  |
| GLUCOSE<br>mg/dL           | N             | 5         | 3     | 3     | 5     | 5             | 3     | 3     | 5     |
|                            | Mean          | 92.       | 95.   | 99.   | 93.   | 92.           | 92.   | 99.   | 106.  |
|                            | Sdev          | 6.1       | 2.6   | 7.0   | 8.5   | 10.0          | 18.0  | 13.1  | 7.6   |
| TRIGLYCERIDES<br>mg/dL     | N             | 5         | 3     | 3     | 5     | 5             | 3     | 3     | 5     |
|                            | Mean          | 23.       | 26.   | 27.   | 28.   | 21.           | 36.   | 39.+  | 33.   |
|                            | Sdev          | 5.4       | 11.4  | 4.0   | 4.8   | 2.9           | 13.9  | 4.4   | 8.6   |
| TOTAL CHOLESTEROL<br>mg/dL | N             | 5         | 3     | 3     | 5     | 5             | 3     | 3     | 5     |
|                            | Mean          | 117.      | 126.  | 141.  | 155.  | 111.          | 141.  | 143.  | 180.+ |
|                            | Sdev          | 18.2      | 12.5  | 12.4  | 33.0  | 18.5          | 40.8  | 33.2  | 40.5  |
| CALCIUM<br>mg/dL           | N             | 5         | 3     | 3     | 5     | 5             | 3     | 3     | 5     |
|                            | Mean          | 10.3      | 10.3  | 10.3  | 10.2  | 10.3          | 10.7  | 10.3  | 10.9  |
|                            | Sdev          | 0.57      | 0.10  | 0.71  | 0.48  | 0.53          | 0.38  | 0.46  | 0.38  |

Group 1:Vehicle

Group 2:50 mg/kg/day

Group 3:200 mg/kg/day

Group 4:800 mg/kg/day

Group means without footnotes were not statistically different from the control at p=0.05 or p=0.01.

+ The group mean was significantly different from the control at p=0.05 with Dunnett's test of significance

CONFIDENTIAL

Table 7  
Day 28 Clinical Chemistry Data  
Test period

Session 1 (Scheduled)  
Fexinidazole

Study Number: 0505-2007

| Parameter            | Group Number: | M a l e s |       |       |       | F e m a l e s |       |       |        |
|----------------------|---------------|-----------|-------|-------|-------|---------------|-------|-------|--------|
|                      |               | 1         | 2     | 3     | 4     | 1             | 2     | 3     | 4      |
| PHOSPHOROUS<br>mg/dL | N             | 5         | 3     | 3     | 5     | 5             | 3     | 3     | 5      |
|                      | Mean          | 4.3       | 4.4   | 3.9   | 4.3   | 4.0           | 4.3   | 3.9   | 3.9    |
|                      | Sdev          | 0.42      | 0.06  | 0.60  | 0.56  | 0.41          | 0.15  | 0.80  | 0.32   |
| ALBUMIN/GLOBULIN     | N             | 5         | 3     | 3     | 5     | 5             | 3     | 3     | 5      |
|                      | Mean          | 1.0       | 1.2   | 1.1   | 1.2   | 1.1           | 1.1   | 1.1   | 1.1    |
|                      | Sdev          | 0.08      | 0.05  | 0.21  | 0.09  | 0.18          | 0.05  | 0.05  | 0.12   |
| SODIUM<br>mEq/L      | N             | 5         | 3     | 3     | 5     | 5             | 3     | 3     | 5      |
|                      | Mean          | 141.2     | 142.3 | 142.3 | 142.2 | 142.0         | 142.3 | 143.0 | 144.2+ |
|                      | Sdev          | 0.45      | 0.58  | 1.53  | 1.30  | 0.71          | 1.15  | 1.00  | 1.64   |
| POTASSIUM<br>mEq/L   | N             | 5         | 3     | 3     | 5     | 5             | 3     | 3     | 5      |
|                      | Mean          | 4.5       | 4.3   | 4.4   | 4.4   | 4.5           | 4.3   | 4.4   | 4.3    |
|                      | Sdev          | 0.12      | 0.16  | 0.21  | 0.19  | 0.24          | 0.14  | 0.27  | 0.18   |
| CHLORIDE<br>mEq/L    | N             | 5         | 3     | 3     | 5     | 5             | 3     | 3     | 5      |
|                      | Mean          | 110.2     | 110.3 | 111.3 | 111.6 | 110.6         | 109.7 | 111.7 | 109.8  |
|                      | Sdev          | 2.59      | 0.58  | 4.04  | 2.19  | 2.07          | 1.15  | 1.53  | 3.90   |

Group 1:Vehicle                      Group 2:50 mg/kg/day                      Group 3:200 mg/kg/day                      Group 4:800 mg/kg/day

Group means without footnotes were not statistically different from the control at p=0.05 or p=0.01.  
+ The group mean was significantly different from the control at p=0.05 with Dunnett's test of significance

CONFIDENTIAL

Table 7  
Day 42 Clinical Chemistry Data  
Test period

Session 1 (Scheduled)  
Fexinidazole

Study Number: 0505-2007

| Parameter                           | Group Number: | M a l e s |   |   |       | F e m a l e s |   |   |       |
|-------------------------------------|---------------|-----------|---|---|-------|---------------|---|---|-------|
|                                     |               | 1         | 2 | 3 | 4     | 1             | 2 | 3 | 4     |
| UREA<br>mg/dL                       | N             | 2         | 0 | 0 | 2     | 2             | 0 | 0 | 2     |
|                                     | Mean          | 37.       | - | - | 25.   | 26.           | - | - | 28.   |
|                                     | Sdev          | 7.1       | - | - | 0.7   | 4.9           | - | - | 4.2   |
| CREATININE<br>mg/dL                 | N             | 2         | 0 | 0 | 2     | 2             | 0 | 0 | 2     |
|                                     | Mean          | 0.88      | - | - | 0.77  | 0.96          | - | - | 0.91  |
|                                     | Sdev          | 0.042     | - | - | 0.057 | 0.035         | - | - | 0.049 |
| ASPARTATE AMINO TRANSFERASE<br>IU/L | N             | 2         | 0 | 0 | 2     | 2             | 0 | 0 | 2     |
|                                     | Mean          | 38.       | - | - | 40.   | 36.           | - | - | 24.+  |
|                                     | Sdev          | 9.2       | - | - | 5.7   | 3.5           | - | - | 2.1   |
| ALANINE AMINO TRANSFERASE<br>IU/L   | N             | 2         | 0 | 0 | 2     | 2             | 0 | 0 | 2     |
|                                     | Mean          | 32.       | - | - | 43.   | 31.           | - | - | 34.   |
|                                     | Sdev          | 12.7      | - | - | 21.9  | 7.1           | - | - | 6.4   |
| ALKALINE PHOSPHATASE<br>IU/L        | N             | 2         | 0 | 0 | 2     | 2             | 0 | 0 | 2     |
|                                     | Mean          | 59.       | - | - | 71.   | 80.           | - | - | 69.   |
|                                     | Sdev          | 3.5       | - | - | 10.6  | 37.5          | - | - | 9.2   |
| GAMMA GLUTAMYL TRANSFERASE<br>IU/L  | N             | 2         | 0 | 0 | 2     | 2             | 0 | 0 | 2     |
|                                     | Mean          | 7.        | - | - | 10.   | 7.            | - | - | 8.    |
|                                     | Sdev          | 2.1       | - | - | 4.2   | 0.7           | - | - | 0.7   |
| TOTAL BILIRUBIN<br>mg/dL            | N             | 2         | 0 | 0 | 2     | 2             | 0 | 0 | 2     |
|                                     | Mean          | 0.08      | - | - | 0.08  | 0.08          | - | - | 0.08  |
|                                     | Sdev          | 0.007     | - | - | 0.014 | 0.007         | - | - | 0.014 |

Group 1:Vehicle

Group 2:50 mg/kg/day

Group 3:200 mg/kg/day

Group 4:800 mg/kg/day

Group means without footnotes were not statistically different from the control at p=0.05 or p=0.01.

+ The group mean was significantly different from the control at p=0.05 with Dunnett's test of significance

CONFIDENTIAL

Table 7  
Day 42 Clinical Chemistry Data  
Test period

Session 1 (Scheduled)  
Fexinidazole

Study Number: 0505-2007

| Parameter                  | Group Number: | M a l e s |   |   |       | F e m a l e s |   |   |       |
|----------------------------|---------------|-----------|---|---|-------|---------------|---|---|-------|
|                            |               | 1         | 2 | 3 | 4     | 1             | 2 | 3 | 4     |
| TOTAL PROTEIN<br>g/dL      | N             | 2         | 0 | 0 | 2     | 2             | 0 | 0 | 2     |
|                            | Mean          | 5.7       | - | - | 6.2+  | 5.9           | - | - | 5.8   |
|                            | Sdev          | 0.14      | - | - | 0.07  | 0.21          | - | - | 0.07  |
| ALBUMIN<br>g/dL            | N             | 2         | 0 | 0 | 2     | 2             | 0 | 0 | 2     |
|                            | Mean          | 2.56      | - | - | 2.92* | 2.89          | - | - | 2.92  |
|                            | Sdev          | 0.014     | - | - | 0.035 | 0.028         | - | - | 0.021 |
| GLOBULIN<br>g/dL           | N             | 2         | 0 | 0 | 2     | 2             | 0 | 0 | 2     |
|                            | Mean          | 3.1       | - | - | 3.2   | 3.0           | - | - | 2.8   |
|                            | Sdev          | 0.13      | - | - | 0.04  | 0.18          | - | - | 0.05  |
| GLUCOSE<br>mg/dL           | N             | 2         | 0 | 0 | 2     | 2             | 0 | 0 | 2     |
|                            | Mean          | 99.       | - | - | 91.   | 97.           | - | - | 105.  |
|                            | Sdev          | 8.5       | - | - | 12.7  | 5.7           | - | - | 14.8  |
| TRIGLYCERIDES<br>mg/dL     | N             | 2         | 0 | 0 | 2     | 2             | 0 | 0 | 2     |
|                            | Mean          | 29.       | - | - | 23.   | 33.           | - | - | 29.   |
|                            | Sdev          | 6.4       | - | - | 6.4   | 7.8           | - | - | 12.0  |
| TOTAL CHOLESTEROL<br>mg/dL | N             | 2         | 0 | 0 | 2     | 2             | 0 | 0 | 2     |
|                            | Mean          | 117.      | - | - | 116.  | 123.          | - | - | 159.  |
|                            | Sdev          | 44.5      | - | - | 35.4  | 17.0          | - | - | 40.3  |
| CALCIUM<br>mg/dL           | N             | 2         | 0 | 0 | 2     | 2             | 0 | 0 | 2     |
|                            | Mean          | 10.3      | - | - | 10.7  | 11.0          | - | - | 10.9  |
|                            | Sdev          | 0.99      | - | - | 0.28  | 0.21          | - | - | 0.35  |

Group 1:Vehicle

Group 2:50 mg/kg/day

Group 3:200 mg/kg/day

Group 4:800 mg/kg/day

Group means without footnotes were not statistically different from the control at p=0.05 or p=0.01.

+ The group mean was significantly different from the control at p=0.05 with Dunnett's test of significance

\* The group mean was significantly different from the control at p=0.01 with Dunnett's test of significance



**CONFIDENTIAL**

Table 7

Day 42 Clinical Chemistry Data  
Test period

Session 1 (Scheduled)  
Fexinidazole

Study Number: 0505-2007

| Parameter            | Group Number: | M a l e s            |   |   |                       | F e m a l e s |   |                       |       |  |
|----------------------|---------------|----------------------|---|---|-----------------------|---------------|---|-----------------------|-------|--|
|                      |               | 1                    | 2 | 3 | 4                     | 1             | 2 | 3                     | 4     |  |
| PHOSPHOROUS<br>mg/dL | N             | 2                    | 0 | 0 | 2                     | 2             | 0 | 0                     | 2     |  |
|                      | Mean          | 4.8                  | - | - | 4.4                   | 4.7           | - | -                     | 4.5   |  |
|                      | Sdev          | 0.35                 | - | - | 0.49                  | 0.07          | - | -                     | 0.21  |  |
| ALBUMIN/GLOBULIN     | N             | 2                    | 0 | 0 | 2                     | 2             | 0 | 0                     | 2     |  |
|                      | Mean          | 0.8                  | - | - | 0.9+                  | 1.0           | - | -                     | 1.0   |  |
|                      | Sdev          | 0.03                 | - | - | 0.00                  | 0.05          | - | -                     | 0.01  |  |
| SODIUM<br>mEq/L      | N             | 2                    | 0 | 0 | 2                     | 2             | 0 | 0                     | 2     |  |
|                      | Mean          | 141.5                | - | - | 142.0                 | 141.0         | - | -                     | 140.0 |  |
|                      | Sdev          | 0.71                 | - | - | 0.00                  | 1.41          | - | -                     | 0.00  |  |
| POTASSIUM<br>mEq/L   | N             | 2                    | 0 | 0 | 2                     | 2             | 0 | 0                     | 2     |  |
|                      | Mean          | 4.5                  | - | - | 4.5                   | 4.4           | - | -                     | 4.5   |  |
|                      | Sdev          | 0.11                 | - | - | 0.17                  | 0.12          | - | -                     | 0.03  |  |
| CHLORIDE<br>mEq/L    | N             | 2                    | 0 | 0 | 2                     | 2             | 0 | 0                     | 2     |  |
|                      | Mean          | 111.5                | - | - | 108.5                 | 111.0         | - | -                     | 109.5 |  |
|                      | Sdev          | 3.54                 | - | - | 0.71                  | 1.41          | - | -                     | 2.12  |  |
| Group 1:Vehicle      |               | Group 2:50 mg/kg/day |   |   | Group 3:200 mg/kg/day |               |   | Group 4:800 mg/kg/day |       |  |

Group means without footnotes were not statistically different from the control at p=0.05 or p=0.01.

+ The group mean was significantly different from the control at p=0.05 with Dunnett's test of significance

***Table 8 Urinalysis Quantitative***

CONFIDENTIAL

Table 8  
Day -7 Urine Data  
Pretest phase

Session 1 (Scheduled)  
Fexinidazole

Study Number: 0505-2007

| Parameter            | Group Number:        | M a l e s             |        |                       |        | F e m a l e s |        |        |        |
|----------------------|----------------------|-----------------------|--------|-----------------------|--------|---------------|--------|--------|--------|
|                      |                      | 1                     | 2      | 3                     | 4      | 1             | 2      | 3      | 4      |
| URINARY VOLUME<br>mL | N                    | 5                     | 3      | 3                     | 5      | 5             | 3      | 3      | 5      |
|                      | Mean                 | 242.8                 | 163.7  | 192.7                 | 414.0  | 196.2         | 146.3  | 164.7  | 179.6  |
|                      | Sdev                 | 71.83                 | 88.27  | 174.46                | 258.63 | 110.68        | 97.30  | 108.85 | 112.61 |
| PH<br>UNITS          | N                    | 5                     | 3      | 3                     | 5      | 5             | 3      | 3      | 5      |
|                      | Mean                 | 7.2                   | 7.5    | 7.0                   | 7.0    | 6.9           | 7.0    | 6.8    | 7.1    |
|                      | Sdev                 | 0.45                  | 0.87   | 2.00                  | 0.00   | 0.22          | 0.00   | 0.29   | 0.55   |
| SPECIFIC GRAVITY     | N                    | 5                     | 3      | 3                     | 5      | 5             | 3      | 3      | 5      |
|                      | Mean                 | 1.017                 | 1.021  | 1.020                 | 1.023  | 1.027         | 1.019  | 1.023  | 1.021  |
|                      | Sdev                 | 0.0016                | 0.0064 | 0.0136                | 0.0118 | 0.0084        | 0.0038 | 0.0125 | 0.0067 |
| Group 1:Vehicle      | Group 2:50 mg/kg/day | Group 3:200 mg/kg/day |        | Group 4:800 mg/kg/day |        |               |        |        |        |

Group means without footnotes were not statistically different from the control at p=0.05 or p=0.01.

CONFIDENTIAL  
Table 8  
Day 28 Urine Data  
Test period

Session 1 (Scheduled)  
Fexinidazole

Study Number: 0505-2007

| Parameter            | Group Number: | M a l e s            |        |        |                       | F e m a l e s |        |                       |        |  |
|----------------------|---------------|----------------------|--------|--------|-----------------------|---------------|--------|-----------------------|--------|--|
|                      |               | 1                    | 2      | 3      | 4                     | 1             | 2      | 3                     | 4      |  |
| URINARY VOLUME<br>mL | N             | 5                    | 3      | 3      | 5                     | 5             | 3      | 3                     | 5      |  |
|                      | Mean          | 148.6                | 224.7  | 309.0  | 355.6                 | 216.2         | 165.0  | 167.3                 | 190.8  |  |
|                      | Sdev          | 96.44                | 291.43 | 126.53 | 170.55                | 155.53        | 16.46  | 91.59                 | 115.38 |  |
| PH<br>UNITS          | N             | 5                    | 3      | 3      | 5                     | 5             | 3      | 3                     | 5      |  |
|                      | Mean          | 7.0                  | 7.0    | 6.7*   | 7.0                   | 7.6           | 7.0    | 7.7                   | 7.1    |  |
|                      | Sdev          | 0.00                 | 0.00   | 0.29   | 0.00                  | 0.89          | 0.00   | 0.58                  | 0.55   |  |
| SPECIFIC GRAVITY     | N             | 5                    | 3      | 3      | 5                     | 5             | 3      | 3                     | 5      |  |
|                      | Mean          | 1.023                | 1.026  | 1.020  | 1.019                 | 1.028         | 1.015  | 1.026                 | 1.021  |  |
|                      | Sdev          | 0.0049               | 0.0095 | 0.0035 | 0.0037                | 0.0073        | 0.0104 | 0.0074                | 0.0081 |  |
| Group 1:Vehicle      |               | Group 2:50 mg/kg/day |        |        | Group 3:200 mg/kg/day |               |        | Group 4:800 mg/kg/day |        |  |

Group means without footnotes were not statistically different from the control at p=0.05 or p=0.01.

\* The group mean was significantly different from the control at p=0.01 with Dunnett's test of significance

CONFIDENTIAL  
Table 8  
Day 42 Urine Data  
Test period

Session 1 (Scheduled)  
Fexinidazole

Study Number: 0505-2007

| Parameter            | Group Number: | M a l e s            |   |   |                       | F e m a l e s |   |                       |        |  |
|----------------------|---------------|----------------------|---|---|-----------------------|---------------|---|-----------------------|--------|--|
|                      |               | 1                    | 2 | 3 | 4                     | 1             | 2 | 3                     | 4      |  |
| URINARY VOLUME<br>mL | N             | 2                    | 0 | 0 | 2                     | 2             | 0 | 0                     | 2      |  |
|                      | Mean          | 416.0                | - | - | 130.0                 | 196.0         | - | -                     | 236.5  |  |
|                      | Sdev          | 313.96               | - | - | 25.46                 | 62.23         | - | -                     | 125.16 |  |
| PH<br>UNITS          | N             | 2                    | 0 | 0 | 2                     | 2             | 0 | 0                     | 2      |  |
|                      | Mean          | 6.8                  | - | - | 7.5                   | 8.5           | - | -                     | 8.0    |  |
|                      | Sdev          | 0.35                 | - | - | 0.71                  | 0.71          | - | -                     | 1.41   |  |
| SPECIFIC GRAVITY     | N             | 2                    | 0 | 0 | 2                     | 2             | 0 | 0                     | 2      |  |
|                      | Mean          | 1.020                | - | - | 1.031                 | 1.026         | - | -                     | 1.020  |  |
|                      | Sdev          | 0.0078               | - | - | 0.0078                | 0.0021        | - | -                     | 0.0064 |  |
| Group 1:Vehicle      |               | Group 2:50 mg/kg/day |   |   | Group 3:200 mg/kg/day |               |   | Group 4:800 mg/kg/day |        |  |

Group means without footnotes were not statistically different from the control at p=0.05 or p=0.01.

***Table 9 Urinalysis Semi-quantitative***

CONFIDENTIAL

Table 9  
Day -7 Urine Data  
Pretest phase

Session 1 (Scheduled)  
Fexinidazole

Study Number: 0505-2007

| Parameter                          | Group Number: | M a l e s |     |     |     | F e m a l e s |     |     |     |
|------------------------------------|---------------|-----------|-----|-----|-----|---------------|-----|-----|-----|
|                                    |               | 1         | 2   | 3   | 4   | 1             | 2   | 3   | 4   |
| WHITE BLOOD CELLS<br>SCORE         | N             | 5         | 3   | 3   | 5   | 5             | 3   | 3   | 5   |
|                                    | Mean          | 1.        | 1.  | 1.  | 1.  | 0.            | 0.  | 0.  | 0.  |
|                                    | Sdev          | 0.7       | 1.0 | 1.2 | 0.9 | 0.0           | 0.0 | 0.0 | 0.4 |
| NITRITES<br>SCORE                  | N             | 5         | 3   | 3   | 5   | 5             | 3   | 3   | 5   |
|                                    | Mean          | 0.        | 0.  | 0.  | 0.  | 0.            | 0.  | 0.  | 0.  |
|                                    | Sdev          | 0.4       | 0.0 | 0.0 | 0.4 | 0.0           | 0.0 | 0.0 | 0.5 |
| PROTEINS<br>SCORE                  | N             | 5         | 3   | 3   | 5   | 5             | 3   | 3   | 5   |
|                                    | Mean          | 0.        | 0.  | 0.  | 0.  | 0.            | 0.  | 0.  | 1.  |
|                                    | Sdev          | 0.4       | 0.6 | 0.6 | 0.5 | 0.0           | 0.0 | 0.0 | 0.9 |
| GLUCOSE<br>SCORE                   | N             | 5         | 3   | 3   | 5   | 5             | 3   | 3   | 5   |
|                                    | Mean          | 1.        | 0.  | 1.  | 0.  | 0.            | 0.  | 0.  | 1.  |
|                                    | Sdev          | 1.3       | 0.0 | 1.2 | 0.0 | 0.0           | 0.0 | 0.0 | 1.8 |
| KETONE BODIES<br>SCORE             | N             | 5         | 3   | 3   | 5   | 5             | 3   | 3   | 5   |
|                                    | Mean          | 0.        | 0.  | 0.  | 0.  | 0.            | 0.  | 0.  | 0.  |
|                                    | Sdev          | 0.0       | 0.0 | 0.0 | 0.0 | 0.0           | 0.0 | 0.0 | 0.4 |
| UROBILINOGEN<br>SCORE              | N             | 5         | 3   | 3   | 5   | 5             | 3   | 3   | 5   |
|                                    | Mean          | 0.        | 0.  | 0.  | 0.  | 0.            | 0.  | 0.  | 0.  |
|                                    | Sdev          | 0.0       | 0.0 | 0.0 | 0.0 | 0.0           | 0.0 | 0.0 | 0.0 |
| BILIRUBIN<br>SCORE                 | N             | 5         | 3   | 3   | 5   | 5             | 3   | 3   | 5   |
|                                    | Mean          | 0.        | 0.  | 0.  | 0.  | 0.            | 0.  | 0.  | 0.  |
|                                    | Sdev          | 0.0       | 0.0 | 0.0 | 0.0 | 0.0           | 0.0 | 0.0 | 0.0 |
| HEMOGLOBIN/RED BLOOD CE/+<br>SCORE | N             | 5         | 3   | 3   | 5   | 5             | 3   | 3   | 5   |
|                                    | Mean          | 1.        | 0.  | 1.  | 1.  | 0.            | 0.  | 0.  | 1.  |
|                                    | Sdev          | 0.9       | 0.6 | 0.6 | 0.5 | 0.0           | 0.0 | 0.0 | 1.4 |

Group 1:Vehicle

Group 2:50 mg/kg/day

Group 3:200 mg/kg/day

Group 4:800 mg/kg/day

CONFIDENTIAL

Table 9  
Day 28 Urine Data  
Test period

Session 1 (Scheduled)  
Fexinidazole

Study Number: 0505-2007

| Parameter                          | Group Number: | M a l e s |     |     |     | F e m a l e s |     |     |     |
|------------------------------------|---------------|-----------|-----|-----|-----|---------------|-----|-----|-----|
|                                    |               | 1         | 2   | 3   | 4   | 1             | 2   | 3   | 4   |
| WHITE BLOOD CELLS<br>SCORE         | N             | 5         | 3   | 3   | 5   | 5             | 3   | 3   | 5   |
|                                    | Mean          | 2.        | 2.  | 1.  | 2.  | 0.            | 1.  | 1.  | 0.  |
|                                    | Sdev          | 0.5       | 0.0 | 1.0 | 0.4 | 0.5           | 1.2 | 1.2 | 0.9 |
| NITRITES<br>SCORE                  | N             | 5         | 3   | 3   | 5   | 5             | 3   | 3   | 5   |
|                                    | Mean          | 0.        | 0.  | 0.  | 0.  | 0.            | 0.  | 1.  | 0.  |
|                                    | Sdev          | 0.5       | 0.6 | 0.6 | 0.4 | 0.0           | 0.6 | 0.6 | 0.5 |
| PROTEINS<br>SCORE                  | N             | 5         | 3   | 3   | 5   | 5             | 3   | 3   | 5   |
|                                    | Mean          | 0.        | 1.  | 0.  | 0.  | 0.            | 0.  | 0.  | 1.  |
|                                    | Sdev          | 0.4       | 0.6 | 0.6 | 0.4 | 0.4           | 0.6 | 0.6 | 0.9 |
| GLUCOSE<br>SCORE                   | N             | 5         | 3   | 3   | 5   | 5             | 3   | 3   | 5   |
|                                    | Mean          | 0.        | 0.  | 0.  | 0.  | 0.            | 0.  | 0.  | 1.  |
|                                    | Sdev          | 0.0       | 0.0 | 0.0 | 0.0 | 0.0           | 0.0 | 0.0 | 1.3 |
| KETONE BODIES<br>SCORE             | N             | 5         | 3   | 3   | 5   | 5             | 3   | 3   | 5   |
|                                    | Mean          | 0.        | 0.  | 0.  | 0.  | 0.            | 0.  | 0.  | 0.  |
|                                    | Sdev          | 0.0       | 0.0 | 0.0 | 0.0 | 0.0           | 0.0 | 0.0 | 0.4 |
| UROBILINOGEN<br>SCORE              | N             | 5         | 3   | 3   | 5   | 5             | 3   | 3   | 5   |
|                                    | Mean          | 0.        | 0.  | 0.  | 0.  | 0.            | 0.  | 0.  | 0.  |
|                                    | Sdev          | 0.0       | 0.0 | 0.0 | 0.0 | 0.0           | 0.0 | 0.0 | 0.0 |
| BILIRUBIN<br>SCORE                 | N             | 5         | 3   | 3   | 5   | 5             | 3   | 3   | 5   |
|                                    | Mean          | 0.        | 0.  | 0.  | 0.  | 0.            | 0.  | 0.  | 0.  |
|                                    | Sdev          | 0.0       | 0.0 | 0.0 | 0.0 | 0.0           | 0.0 | 0.0 | 0.0 |
| HEMOGLOBIN/RED BLOOD CE/+<br>SCORE | N             | 5         | 3   | 3   | 5   | 5             | 3   | 3   | 5   |
|                                    | Mean          | 1.        | 0.  | 1.  | 0.  | 0.            | 1.  | 0.  | 1.  |
|                                    | Sdev          | 0.8       | 0.6 | 0.6 | 0.4 | 0.4           | 1.2 | 0.6 | 1.1 |

Group 1:Vehicle

Group 2:50 mg/kg/day

Group 3:200 mg/kg/day

Group 4:800 mg/kg/day



CONFIDENTIAL

Table 9  
Day 42 Urine Data  
Test period

Session 1 (Scheduled)  
Fexinidazole

Study Number: 0505-2007

| Parameter                          | Group Number: | M a l e s            |   |   |                       | F e m a l e s |   |                       |     |  |
|------------------------------------|---------------|----------------------|---|---|-----------------------|---------------|---|-----------------------|-----|--|
|                                    |               | 1                    | 2 | 3 | 4                     | 1             | 2 | 3                     | 4   |  |
| WHITE BLOOD CELLS<br>SCORE         | N             | 2                    | 0 | 0 | 2                     | 2             | 0 | 0                     | 2   |  |
|                                    | Mean          | 2.                   | - | - | 1.                    | 2.            | - | -                     | 0.  |  |
|                                    | Sdev          | 0.0                  | - | - | 1.4                   | 0.7           | - | -                     | 0.0 |  |
| NITRITES<br>SCORE                  | N             | 2                    | 0 | 0 | 2                     | 2             | 0 | 0                     | 2   |  |
|                                    | Mean          | 0.                   | - | - | 1.                    | 0.            | - | -                     | 0.  |  |
|                                    | Sdev          | 0.0                  | - | - | 0.7                   | 0.0           | - | -                     | 0.0 |  |
| PROTEINS<br>SCORE                  | N             | 2                    | 0 | 0 | 2                     | 2             | 0 | 0                     | 2   |  |
|                                    | Mean          | 0.                   | - | - | 1.                    | 0.            | - | -                     | 0.  |  |
|                                    | Sdev          | 0.0                  | - | - | 0.7                   | 0.0           | - | -                     | 0.0 |  |
| GLUCOSE<br>SCORE                   | N             | 2                    | 0 | 0 | 2                     | 2             | 0 | 0                     | 2   |  |
|                                    | Mean          | 0.                   | - | - | 0.                    | 0.            | - | -                     | 0.  |  |
|                                    | Sdev          | 0.0                  | - | - | 0.0                   | 0.0           | - | -                     | 0.0 |  |
| KETONE BODIES<br>SCORE             | N             | 2                    | 0 | 0 | 2                     | 2             | 0 | 0                     | 2   |  |
|                                    | Mean          | 0.                   | - | - | 1.                    | 0.            | - | -                     | 0.  |  |
|                                    | Sdev          | 0.0                  | - | - | 0.7                   | 0.0           | - | -                     | 0.0 |  |
| UROBILINOGEN<br>SCORE              | N             | 2                    | 0 | 0 | 2                     | 2             | 0 | 0                     | 2   |  |
|                                    | Mean          | 0.                   | - | - | 0.                    | 0.            | - | -                     | 0.  |  |
|                                    | Sdev          | 0.0                  | - | - | 0.0                   | 0.0           | - | -                     | 0.0 |  |
| BILIRUBIN<br>SCORE                 | N             | 2                    | 0 | 0 | 2                     | 2             | 0 | 0                     | 2   |  |
|                                    | Mean          | 0.                   | - | - | 0.                    | 0.            | - | -                     | 0.  |  |
|                                    | Sdev          | 0.0                  | - | - | 0.0                   | 0.0           | - | -                     | 0.0 |  |
| HEMOGLOBIN/RED BLOOD CE/+<br>SCORE | N             | 2                    | 0 | 0 | 2                     | 2             | 0 | 0                     | 2   |  |
|                                    | Mean          | 1.                   | - | - | 1.                    | 1.            | - | -                     | 0.  |  |
|                                    | Sdev          | 0.7                  | - | - | 1.4                   | 1.4           | - | -                     | 0.0 |  |
| Group 1:Vehicle                    |               | Group 2:50 mg/kg/day |   |   | Group 3:200 mg/kg/day |               |   | Group 4:800 mg/kg/day |     |  |

***Table 10 Absolute Organ Weights***

CONFIDENTIAL

Table 10  
 Absolute Organ Weights (g)  
 Test period  
 Days 29 Interim Sacrifice

Fexinidazole

Study Number: 0505-2007

| Group Number | Dose Level    | Terminal Body Wt (kg) | SPLEEN | THYMUS | KIDNEYS | LIVER  | ADRENALS |
|--------------|---------------|-----------------------|--------|--------|---------|--------|----------|
| M a l e s    |               |                       |        |        |         |        |          |
| 1            | Vehicle       |                       |        |        |         |        |          |
|              | N             | 3                     | 3      | 3      | 3       | 3      | 3        |
|              | Mean          | 8.47                  | 21.83  | 5.063  | 39.29   | 284.38 | 1.260    |
|              | Sdev          | 0.366                 | 3.340  | 3.2756 | 4.728   | 40.574 | 0.1323   |
| 2            | 50 mg/kg/day  |                       |        |        |         |        |          |
|              | N             | 3                     | 3      | 3      | 3       | 3      | 3        |
|              | Mean          | 8.21                  | 23.94  | 3.000  | 41.86   | 254.01 | 1.233    |
|              | Sdev          | 1.077                 | 3.770  | 0.9299 | 6.169   | 11.157 | 0.0757   |
| 3            | 200 mg/kg/day |                       |        |        |         |        |          |
|              | N             | 3                     | 3      | 3      | 3       | 3      | 3        |
|              | Mean          | 8.10                  | 18.64  | 1.483  | 36.33   | 280.82 | 1.420    |
|              | Sdev          | 0.504                 | 5.496  | 0.2954 | 0.820   | 40.392 | 0.3874   |
| 4            | 800 mg/kg/day |                       |        |        |         |        |          |
|              | N             | 3                     | 3      | 3      | 3       | 3      | 3        |
|              | Mean          | 7.97                  | 19.22  | 2.487  | 38.62   | 320.11 | 1.460    |
|              | Sdev          | 1.249                 | 7.269  | 0.8406 | 3.819   | 25.000 | 0.1442   |

Note: Data collected using grace days.

CONFIDENTIAL

Table 10  
 Absolute Organ Weights (g)  
 Test period  
 Days 29 Interim Sacrifice

Fexinidazole

Study Number: 0505-2007

| Group Number | Dose Level    | Terminal Body Wt (kg) | HEART | BRAIN  | TESTES | PROSTATE |
|--------------|---------------|-----------------------|-------|--------|--------|----------|
| M a l e s    |               |                       |       |        |        |          |
| 1            | Vehicle       |                       |       |        |        |          |
|              | N             | 3                     | 3     | 3      | 3      | 3        |
|              | Mean          | 8.47                  | 62.57 | 75.61  | 12.26  | 3.44     |
|              | Sdev          | 0.366                 | 3.057 | 10.097 | 1.036  | 0.990    |
| 2            | 50 mg/kg/day  |                       |       |        |        |          |
|              | N             | 3                     | 3     | 3      | 3      | 3        |
|              | Mean          | 8.21                  | 67.97 | 70.33  | 12.93  | 4.66     |
|              | Sdev          | 1.077                 | 5.713 | 3.451  | 2.840  | 0.814    |
| 3            | 200 mg/kg/day |                       |       |        |        |          |
|              | N             | 3                     | 3     | 3      | 3      | 3        |
|              | Mean          | 8.10                  | 63.46 | 72.85  | 10.94  | 3.58     |
|              | Sdev          | 0.504                 | 5.660 | 4.945  | 4.583  | 1.230    |
| 4            | 800 mg/kg/day |                       |       |        |        |          |
|              | N             | 3                     | 3     | 3      | 3      | 3        |
|              | Mean          | 7.97                  | 60.41 | 66.60  | 11.12  | 3.57     |
|              | Sdev          | 1.249                 | 1.059 | 11.516 | 5.596  | 1.981    |

Note: Data collected using grace days.

CONFIDENTIAL

Table 10  
 Absolute Organ Weights (g)  
 Test period  
 Days 29 Interim Sacrifice

Fexinidazole

Study Number: 0505-2007

| Group Number  | Dose Level    | Terminal Body Wt (kg) | SPLEEN | THYMUS | KIDNEYS | LIVER  |
|---------------|---------------|-----------------------|--------|--------|---------|--------|
| F e m a l e s |               |                       |        |        |         |        |
| 1             | Vehicle       |                       |        |        |         |        |
|               | N             | 3                     | 3      | 3      | 3       | 3      |
|               | Mean          | 6.61                  | 16.89  | 1.567  | 31.87   | 248.47 |
|               | Sdev          | 0.276                 | 3.199  | 0.7504 | 1.010   | 12.579 |
| 2             | 50 mg/kg/day  |                       |        |        |         |        |
|               | N             | 3                     | 3      | 3      | 3       | 3      |
|               | Mean          | 7.52                  | 24.23  | 3.203  | 33.48   | 248.92 |
|               | Sdev          | 0.907                 | 7.486  | 1.5864 | 2.945   | 46.166 |
| 3             | 200 mg/kg/day |                       |        |        |         |        |
|               | N             | 3                     | 3      | 3      | 3       | 3      |
|               | Mean          | 7.25                  | 19.89  | 2.247  | 36.31   | 282.12 |
|               | Sdev          | 0.688                 | 8.765  | 1.4275 | 2.933   | 30.857 |
| 4             | 800 mg/kg/day |                       |        |        |         |        |
|               | N             | 3                     | 3      | 3      | 3       | 3      |
|               | Mean          | 6.62                  | 16.72  | 1.323  | 29.80   | 249.56 |
|               | Sdev          | 0.889                 | 3.666  | 0.3320 | 2.819   | 29.715 |

Note: Data collected using grace days.

CONFIDENTIAL

Table 10  
 Absolute Organ Weights (g)  
 Test period  
 Days 29 Interim Sacrifice

Fexinidazole

Study Number: 0505-2007

| Group Number  | Dose Level    | Terminal Body Wt (kg) | ADRENALS | HEART  | BRAIN | OVARIES |
|---------------|---------------|-----------------------|----------|--------|-------|---------|
| F e m a l e s |               |                       |          |        |       |         |
| 1             | Vehicle       |                       |          |        |       |         |
|               | N             | 3                     | 3        | 3      | 3     | 3       |
|               | Mean          | 6.61                  | 1.287    | 56.76  | 74.08 | 0.787   |
|               | Sdev          | 0.276                 | 0.1365   | 1.687  | 2.305 | 0.1718  |
| 2             | 50 mg/kg/day  |                       |          |        |       |         |
|               | N             | 3                     | 3        | 3      | 3     | 3       |
|               | Mean          | 7.52                  | 1.140    | 59.45  | 69.02 | 1.894+  |
|               | Sdev          | 0.907                 | 0.0964   | 2.395  | 4.286 | 0.2362  |
| 3             | 200 mg/kg/day |                       |          |        |       |         |
|               | N             | 3                     | 3        | 3      | 3     | 3       |
|               | Mean          | 7.25                  | 1.290    | 60.32  | 75.30 | 1.667   |
|               | Sdev          | 0.688                 | 0.2307   | 10.318 | 1.752 | 0.4140  |
| 4             | 800 mg/kg/day |                       |          |        |       |         |
|               | N             | 3                     | 3        | 3      | 3     | 3       |
|               | Mean          | 6.62                  | 1.213    | 53.86  | 66.86 | 1.654   |
|               | Sdev          | 0.889                 | 0.0839   | 8.825  | 8.293 | 0.7240  |

Note: Data collected using grace days.

+ The group mean was significantly different from the control at p=0.05.

CONFIDENTIAL

Table 10  
 Absolute Organ Weights (g)  
 Test period  
 Days 43 Final Sacrifice

Fexinidazole

Study Number: 0505-2007

| Group Number | Dose Level    | Terminal Body Wt (kg) | SPLEEN | THYMUS | KIDNEYS | LIVER  | ADRENALS |
|--------------|---------------|-----------------------|--------|--------|---------|--------|----------|
| M a l e s    |               |                       |        |        |         |        |          |
| 1            | Vehicle       |                       |        |        |         |        |          |
|              | N             | 2                     | 2      | 2      | 2       | 2      | 2        |
|              | Mean          | 7.62                  | 18.91  | 2.580  | 32.32   | 246.77 | 1.140    |
|              | Sdev          | 0.351                 | 1.563  | 1.4849 | 1.520   | 10.769 | 0.0424   |
| 4            | 800 mg/kg/day |                       |        |        |         |        |          |
|              | N             | 2                     | 2      | 2      | 2       | 2      | 2        |
|              | Mean          | 7.60                  | 17.27  | 1.380  | 39.86   | 245.12 | 1.110    |
|              | Sdev          | 1.323                 | 4.313  | 0.3111 | 8.273   | 51.237 | 0.0849   |

Note: Data collected using grace days.

CONFIDENTIAL

Table 10  
 Absolute Organ Weights (g)  
 Test period  
 Days 43 Final Sacrifice

Fexinidazole

Study Number: 0505-2007

| Group Number | Dose Level    | Terminal Body Wt (kg) | HEART | BRAIN | TESTES | PROSTATE |
|--------------|---------------|-----------------------|-------|-------|--------|----------|
| M a l e s    |               |                       |       |       |        |          |
| 1            | Vehicle       |                       |       |       |        |          |
|              | N             | 2                     | 2     | 2     | 2      | 2        |
|              | Mean          | 7.62                  | 70.02 | 69.58 | 13.63  | 2.38     |
|              | Sdev          | 0.351                 | 2.616 | 6.152 | 1.266  | 1.796    |
| 4            | 800 mg/kg/day |                       |       |       |        |          |
|              | N             | 2                     | 2     | 2     | 2      | 2        |
|              | Mean          | 7.60                  | 67.03 | 69.37 | 10.22  | 2.08     |
|              | Sdev          | 1.323                 | 6.145 | 8.429 | 0.198  | 1.817    |

Note: Data collected using grace days.



CONFIDENTIAL

Table 10  
 Absolute Organ Weights (g)  
 Test period  
 Days 43 Final Sacrifice

Fexinidazole

Study Number: 0505-2007

| Group Number  | Dose Level    | Terminal Body Wt (kg) | SPLEEN | THYMUS | KIDNEYS | LIVER  |
|---------------|---------------|-----------------------|--------|--------|---------|--------|
| F e m a l e s |               |                       |        |        |         |        |
| 1             | Vehicle       |                       |        |        |         |        |
|               | N             | 2                     | 2      | 2      | 2       | 2      |
|               | Mean          | 8.33                  | 25.41  | 3.045  | 35.25   | 270.76 |
|               | Sdev          | 0.310                 | 4.830  | 0.4313 | 0.247   | 7.905  |
| 4             | 800 mg/kg/day |                       |        |        |         |        |
|               | N             | 2                     | 2      | 2      | 2       | 2      |
|               | Mean          | 7.07                  | 20.57  | 2.035  | 31.80*  | 263.59 |
|               | Sdev          | 0.348                 | 0.148  | 0.7566 | 0.205   | 11.003 |

Note: Data collected using grace days.

\* The group mean was significantly different from the control at p=0.01.

CONFIDENTIAL

Table 10  
 Absolute Organ Weights (g)  
 Test period  
 Days 43 Final Sacrifice

Fexinidazole

Study Number: 0505-2007

| Group Number  | Dose Level    | Terminal Body Wt (kg) | ADRENALS | HEART | BRAIN | OVARIES |
|---------------|---------------|-----------------------|----------|-------|-------|---------|
| F e m a l e s |               |                       |          |       |       |         |
| 1             | Vehicle       |                       |          |       |       |         |
|               | N             | 2                     | 2        | 2     | 2     | 2       |
|               | Mean          | 8.33                  | 1.035    | 63.75 | 68.02 | 1.981   |
|               | Sdev          | 0.310                 | 0.2333   | 4.822 | 4.773 | 0.4171  |
| 4             | 800 mg/kg/day |                       |          |       |       |         |
|               | N             | 2                     | 2        | 2     | 2     | 2       |
|               | Mean          | 7.07                  | 1.150    | 51.97 | 68.59 | 1.583   |
|               | Sdev          | 0.348                 | 0.0283   | 7.333 | 0.417 | 0.0591  |

Note: Data collected using grace days.

***Table 11 Organ/Terminal Body Weight Ratios***

CONFIDENTIAL

Table 11  
Relative Organ Weights (% Body Weight)  
Test period  
Days 29 Interim Sacrifice

Fexinidazole

Study Number: 0505-2007

| Group Number | Dose Level    | Terminal Body Wt (kg) | SPLEEN | THYMUS | KIDNEYS | LIVER | ADRENALS |
|--------------|---------------|-----------------------|--------|--------|---------|-------|----------|
| M a l e s    |               |                       |        |        |         |       |          |
| 1            | Vehicle       |                       |        |        |         |       |          |
|              | N             | 3                     | 3      | 3      | 3       | 3     | 3        |
|              | Mean          | 8.47                  | 0.26   | 0.060  | 0.46    | 3.36  | 0.015    |
|              | Sdev          | 0.366                 | 0.028  | 0.0390 | 0.039   | 0.511 | 0.0011   |
| 2            | 50 mg/kg/day  |                       |        |        |         |       |          |
|              | N             | 3                     | 3      | 3      | 3       | 3     | 3        |
|              | Mean          | 8.21                  | 0.29   | 0.037  | 0.51    | 3.12  | 0.015    |
|              | Sdev          | 1.077                 | 0.056  | 0.0127 | 0.013   | 0.324 | 0.0025   |
| 3            | 200 mg/kg/day |                       |        |        |         |       |          |
|              | N             | 3                     | 3      | 3      | 3       | 3     | 3        |
|              | Mean          | 8.10                  | 0.23   | 0.018  | 0.45    | 3.47  | 0.017    |
|              | Sdev          | 0.504                 | 0.060  | 0.0033 | 0.031   | 0.483 | 0.0045   |
| 4            | 800 mg/kg/day |                       |        |        |         |       |          |
|              | N             | 3                     | 3      | 3      | 3       | 3     | 3        |
|              | Mean          | 7.97                  | 0.24   | 0.031  | 0.49    | 4.07  | 0.019    |
|              | Sdev          | 1.249                 | 0.079  | 0.0066 | 0.027   | 0.642 | 0.0043   |

Note: Data collected using grace days.

CONFIDENTIAL

Table 11  
Relative Organ Weights (% Body Weight)  
Test period  
Days 29 Interim Sacrifice

Fexinidazole

Study Number: 0505-2007

| Group Number | Dose Level    | Terminal Body Wt (kg) | HEART | BRAIN | TESTES | PROSTATE |
|--------------|---------------|-----------------------|-------|-------|--------|----------|
| M a l e s    |               |                       |       |       |        |          |
| 1            | Vehicle       |                       |       |       |        |          |
|              | N             | 3                     | 3     | 3     | 3      | 3        |
|              | Mean          | 8.47                  | 0.74  | 0.89  | 0.14   | 0.04     |
|              | Sdev          | 0.366                 | 0.012 | 0.088 | 0.007  | 0.011    |
| 2            | 50 mg/kg/day  |                       |       |       |        |          |
|              | N             | 3                     | 3     | 3     | 3      | 3        |
|              | Mean          | 8.21                  | 0.83  | 0.87  | 0.16   | 0.06     |
|              | Sdev          | 1.077                 | 0.051 | 0.139 | 0.021  | 0.009    |
| 3            | 200 mg/kg/day |                       |       |       |        |          |
|              | N             | 3                     | 3     | 3     | 3      | 3        |
|              | Mean          | 8.10                  | 0.78  | 0.90  | 0.14   | 0.04     |
|              | Sdev          | 0.504                 | 0.021 | 0.063 | 0.062  | 0.018    |
| 4            | 800 mg/kg/day |                       |       |       |        |          |
|              | N             | 3                     | 3     | 3     | 3      | 3        |
|              | Mean          | 7.97                  | 0.77  | 0.85  | 0.13   | 0.04     |
|              | Sdev          | 1.249                 | 0.112 | 0.183 | 0.054  | 0.020    |

Note: Data collected using grace days.

CONFIDENTIAL

Table 11  
Relative Organ Weights (% Body Weight)  
Test period  
Days 29 Interim Sacrifice

Fexinidazole

Study Number: 0505-2007

| Group Number  | Dose Level    | Terminal Body Wt (kg) | SPLEEN | THYMUS | KIDNEYS | LIVER |
|---------------|---------------|-----------------------|--------|--------|---------|-------|
| F e m a l e s |               |                       |        |        |         |       |
| 1             | Vehicle       |                       |        |        |         |       |
|               | N             | 3                     | 3      | 3      | 3       | 3     |
|               | Mean          | 6.61                  | 0.25   | 0.024  | 0.48    | 3.77  |
|               | Sdev          | 0.276                 | 0.039  | 0.0120 | 0.020   | 0.347 |
| 2             | 50 mg/kg/day  |                       |        |        |         |       |
|               | N             | 3                     | 3      | 3      | 3       | 3     |
|               | Mean          | 7.52                  | 0.32   | 0.041  | 0.45    | 3.29  |
|               | Sdev          | 0.907                 | 0.065  | 0.0159 | 0.021   | 0.222 |
| 3             | 200 mg/kg/day |                       |        |        |         |       |
|               | N             | 3                     | 3      | 3      | 3       | 3     |
|               | Mean          | 7.25                  | 0.27   | 0.031  | 0.50    | 3.90  |
|               | Sdev          | 0.688                 | 0.092  | 0.0199 | 0.020   | 0.331 |
| 4             | 800 mg/kg/day |                       |        |        |         |       |
|               | N             | 3                     | 3      | 3      | 3       | 3     |
|               | Mean          | 6.62                  | 0.25   | 0.020  | 0.45    | 3.79  |
|               | Sdev          | 0.889                 | 0.028  | 0.0046 | 0.034   | 0.374 |

Note: Data collected using grace days.

CONFIDENTIAL

Table 11  
Relative Organ Weights (% Body Weight)  
Test period  
Days 29 Interim Sacrifice

Fexinidazole

Study Number: 0505-2007

| Group Number  | Dose Level    | Terminal Body Wt (kg) | ADRENALS | HEART | BRAIN | OVARIES |
|---------------|---------------|-----------------------|----------|-------|-------|---------|
| F e m a l e s |               |                       |          |       |       |         |
| 1             | Vehicle       |                       |          |       |       |         |
|               | N             | 3                     | 3        | 3     | 3     | 3       |
|               | Mean          | 6.61                  | 0.019    | 0.86  | 1.12  | 0.012   |
|               | Sdev          | 0.276                 | 0.0021   | 0.059 | 0.042 | 0.0028  |
| 2             | 50 mg/kg/day  |                       |          |       |       |         |
|               | N             | 3                     | 3        | 3     | 3     | 3       |
|               | Mean          | 7.52                  | 0.015    | 0.80  | 0.93  | 0.025   |
|               | Sdev          | 0.907                 | 0.0027   | 0.078 | 0.144 | 0.0015  |
| 3             | 200 mg/kg/day |                       |          |       |       |         |
|               | N             | 3                     | 3        | 3     | 3     | 3       |
|               | Mean          | 7.25                  | 0.018    | 0.83  | 1.04  | 0.023   |
|               | Sdev          | 0.688                 | 0.0043   | 0.070 | 0.100 | 0.0035  |
| 4             | 800 mg/kg/day |                       |          |       |       |         |
|               | N             | 3                     | 3        | 3     | 3     | 3       |
|               | Mean          | 6.62                  | 0.019    | 0.81  | 1.01  | 0.024   |
|               | Sdev          | 0.889                 | 0.0032   | 0.038 | 0.024 | 0.0072  |

Note: Data collected using grace days.

CONFIDENTIAL

Table 11  
Relative Organ Weights (% Body Weight)  
Test period  
Days 43 Final Sacrifice

Fexinidazole

Study Number: 0505-2007

| Group Number | Dose Level    | Terminal Body Wt (kg) | SPLEEN | THYMUS | KIDNEYS | LIVER | ADRENALS |
|--------------|---------------|-----------------------|--------|--------|---------|-------|----------|
| M a l e s    |               |                       |        |        |         |       |          |
| 1            | Vehicle       |                       |        |        |         |       |          |
|              | N             | 2                     | 2      | 2      | 2       | 2     | 2        |
|              | Mean          | 7.62                  | 0.25   | 0.033  | 0.42    | 3.24  | 0.015    |
|              | Sdev          | 0.351                 | 0.009  | 0.0179 | 0.000   | 0.008 | 0.0012   |
| 4            | 800 mg/kg/day |                       |        |        |         |       |          |
|              | N             | 2                     | 2      | 2      | 2       | 2     | 2        |
|              | Mean          | 7.60                  | 0.23   | 0.018  | 0.52    | 3.22  | 0.015    |
|              | Sdev          | 1.323                 | 0.017  | 0.0009 | 0.018   | 0.114 | 0.0037   |

Note: Data collected using grace days.



CONFIDENTIAL

Table 11  
Relative Organ Weights (% Body Weight)  
Test period  
Days 43 Final Sacrifice

Fexinidazole

Study Number: 0505-2007

| Group Number | Dose Level    | Terminal Body Wt (kg) | HEART | BRAIN | TESTES | PROSTATE |
|--------------|---------------|-----------------------|-------|-------|--------|----------|
| M a l e s    |               |                       |       |       |        |          |
| 1            | Vehicle       |                       |       |       |        |          |
|              | N             | 2                     | 2     | 2     | 2      | 2        |
|              | Mean          | 7.62                  | 0.92  | 0.92  | 0.18   | 0.03     |
|              | Sdev          | 0.351                 | 0.008 | 0.123 | 0.025  | 0.022    |
| 4            | 800 mg/kg/day |                       |       |       |        |          |
|              | N             | 2                     | 2     | 2     | 2      | 2        |
|              | Mean          | 7.60                  | 0.89  | 0.92  | 0.14   | 0.03     |
|              | Sdev          | 1.323                 | 0.074 | 0.049 | 0.021  | 0.019    |

Note: Data collected using grace days.

CONFIDENTIAL

Table 11  
Relative Organ Weights (% Body Weight)  
Test period  
Days 43 Final Sacrifice

Fexinidazole

Study Number: 0505-2007

| Group Number  | Dose Level    | Terminal Body Wt (kg) | SPLEEN | THYMUS | KIDNEYS | LIVER |
|---------------|---------------|-----------------------|--------|--------|---------|-------|
| F e m a l e s |               |                       |        |        |         |       |
| 1             | Vehicle       |                       |        |        |         |       |
|               | N             | 2                     | 2      | 2      | 2       | 2     |
|               | Mean          | 8.33                  | 0.30   | 0.037  | 0.42    | 3.25  |
|               | Sdev          | 0.310                 | 0.047  | 0.0065 | 0.019   | 0.026 |
| 4             | 800 mg/kg/day |                       |        |        |         |       |
|               | N             | 2                     | 2      | 2      | 2       | 2     |
|               | Mean          | 7.07                  | 0.29   | 0.029  | 0.45    | 3.73  |
|               | Sdev          | 0.348                 | 0.016  | 0.0093 | 0.019   | 0.028 |

Note: Data collected using grace days.

CONFIDENTIAL

Table 11  
Relative Organ Weights (% Body Weight)  
Test period  
Days 43 Final Sacrifice

Fexinidazole

Study Number: 0505-2007

| Group Number  | Dose Level    | Terminal Body Wt (kg) | ADRENALS | HEART | BRAIN | OVARIES |
|---------------|---------------|-----------------------|----------|-------|-------|---------|
| F e m a l e s |               |                       |          |       |       |         |
| 1             | Vehicle       |                       |          |       |       |         |
|               | N             | 2                     | 2        | 2     | 2     | 2       |
|               | Mean          | 8.33                  | 0.012    | 0.77  | 0.82  | 0.024   |
|               | Sdev          | 0.310                 | 0.0023   | 0.087 | 0.088 | 0.0059  |
| 4             | 800 mg/kg/day |                       |          |       |       |         |
|               | N             | 2                     | 2        | 2     | 2     | 2       |
|               | Mean          | 7.07                  | 0.016    | 0.73  | 0.97  | 0.022   |
|               | Sdev          | 0.348                 | 0.0004   | 0.068 | 0.042 | 0.0003  |

Note: Data collected using grace days.

***Table 12 Gross Pathology***

CONFIDENTIAL

Table 12  
Incidence Summary for Gross Necropsy Observations  
Test period  
Days 29 Interim Sacrifice

Fexinidazole

Study Number: 0505-2007

| Group Number:              | M a l e s |   |   |   | F e m a l e s |   |   |   |
|----------------------------|-----------|---|---|---|---------------|---|---|---|
|                            | 1         | 2 | 3 | 4 | 1             | 2 | 3 | 4 |
| Number in Group:           | 3         | 3 | 3 | 3 | 3             | 3 | 3 | 3 |
| <hr/>                      |           |   |   |   |               |   |   |   |
| GENER. CONDITION           |           |   |   |   |               |   |   |   |
| GOOD .....                 | 3         | 3 | 2 | 2 | 2             | 3 | 2 | 3 |
| FAIRLY GOOD .....          | 0         | 0 | 1 | 1 | 1             | 0 | 1 | 0 |
| LYMPH NODES                |           |   |   |   |               |   |   |   |
| ENLARGED .....             | 0         | 0 | 1 | 0 | 0             | 0 | 0 | 0 |
| PERITONEAL CAV.            |           |   |   |   |               |   |   |   |
| CLEAR LIQUID CONTENT ..... | 0         | 0 | 1 | 0 | 2             | 0 | 1 | 0 |
| PROSTATE                   |           |   |   |   |               |   |   |   |
| SMALL .....                | 0         | 0 | 0 | 1 | 0             | 0 | 0 | 0 |
| TESTES                     |           |   |   |   |               |   |   |   |
| SMALL, BILATERALLY .....   | 0         | 0 | 1 | 1 | 0             | 0 | 0 | 0 |
| FLACCID .....              | 0         | 0 | 1 | 1 | 0             | 0 | 0 | 0 |
| THYMUS                     |           |   |   |   |               |   |   |   |
| SMALL .....                | 0         | 0 | 0 | 0 | 1             | 0 | 1 | 0 |

Note: The necropsy was conducted over multiple days.  
Group 1:Vehicle

Group 2:50 mg/kg/day

Group 3:200 mg/kg/day

Group 4:800 mg/kg/day

**CONFIDENTIAL**

Table 12  
Incidence Summary for Gross Necropsy Observations  
Test period  
Days 43 Final Sacrifice

Fexinidazole

Study Number: 0505-2007

|                         | M a l e s |   |   |   | F e m a l e s |   |   |   |
|-------------------------|-----------|---|---|---|---------------|---|---|---|
|                         | 1         | 2 | 3 | 4 | 1             | 2 | 3 | 4 |
| Group Number:           | 1         | 2 | 3 | 4 | 1             | 2 | 3 | 4 |
| Number in Group:        | 2         | 0 | 0 | 2 | 2             | 0 | 0 | 2 |
| <b>GENER. CONDITION</b> |           |   |   |   |               |   |   |   |
| GOOD .....              | 2         | 0 | 0 | 1 | 2             | 0 | 0 | 2 |
| FAIRLY GOOD .....       | 0         | 0 | 0 | 1 | 0             | 0 | 0 | 0 |
| <b>PROSTATE</b>         |           |   |   |   |               |   |   |   |
| SMALL .....             | 1         | 0 | 0 | 1 | 0             | 0 | 0 | 0 |

Note: The necropsy was conducted over multiple days.

Group 1:Vehicle

Group 2:50 mg/kg/day

Group 3:200 mg/kg/day

Group 4:800 mg/kg/day

***Table 13 Microscopic Pathology***

CONFIDENTIAL

Table 13  
Expanded Incidence Summary for Microscopic Observations  
Test period  
Days 29 Interim Sacrifice

Fexinidazole

Study Number: 0505-2007

| CONTROLS FROM GROUP(S): 1                               |           | ANIMAL SEX: M a l e s |   |   |   | F e m a l e s |   |   |   |   |
|---------------------------------------------------------|-----------|-----------------------|---|---|---|---------------|---|---|---|---|
| T I S S U E S W I T H D I A G N O S E S                 |           | DOSAGE GROUP:         | 1 | 2 | 3 | 4             | 1 | 2 | 3 | 4 |
|                                                         |           | NO. IN GROUP:         | 3 | 3 | 3 | 3             | 3 | 3 | 3 | 3 |
| ADRENALS                                                | . . . . . | .NUMBER EXAMINED:     | 3 | 0 | 0 | 3             | 3 | 0 | 0 | 3 |
| AORTA-THORACIC                                          | . . . . . | .NUMBER EXAMINED:     | 3 | 0 | 0 | 3             | 3 | 0 | 0 | 3 |
| ECTOPIC THYROID                                         |           | Nad>                  | 3 | 0 | 0 | 2             | 3 | 0 | 0 | 2 |
|                                                         |           | Present>              | 0 | 0 | 0 | 1             | 0 | 0 | 0 | 1 |
| BONE MARROW                                             | . . . . . | .NUMBER EXAMINED:     | 3 | 3 | 3 | 3             | 3 | 0 | 0 | 3 |
| REDUCED CELLULARITY                                     |           | Nad>                  | 3 | 3 | 2 | 2             | 3 | 0 | 0 | 3 |
|                                                         |           | Minimal>              | 0 | 0 | 1 | 0             | 0 | 0 | 0 | 0 |
|                                                         |           | Moderate>             | 0 | 0 | 0 | 1             | 0 | 0 | 0 | 0 |
| ATROPHY OF ADIPOSE TISSUE IN STERNAL AND FEMORAL MARROW |           | Nad>                  | 3 | 3 | 3 | 2             | 3 | 0 | 0 | 3 |
|                                                         |           | Moderate>             | 0 | 0 | 0 | 1             | 0 | 0 | 0 | 0 |
| BRAIN                                                   | . . . . . | .NUMBER EXAMINED:     | 3 | 0 | 0 | 3             | 3 | 0 | 0 | 3 |
| CECUM                                                   | . . . . . | .NUMBER EXAMINED:     | 3 | 0 | 0 | 3             | 3 | 0 | 0 | 3 |
| COLON                                                   | . . . . . | .NUMBER EXAMINED:     | 3 | 0 | 0 | 3             | 3 | 0 | 0 | 3 |
| CRYPT DILATATION WITH/WITHOUT LUMENAL NECROTIC DEBRIS   |           | Nad>                  | 1 | 0 | 0 | 3             | 3 | 0 | 0 | 3 |
|                                                         |           | Minimal>              | 2 | 0 | 0 | 0             | 0 | 0 | 0 | 0 |
| DIAPHRAGM                                               | . . . . . | .NUMBER EXAMINED:     | 3 | 0 | 0 | 3             | 3 | 0 | 0 | 3 |
| DUODENUM                                                | . . . . . | .NUMBER EXAMINED:     | 3 | 0 | 0 | 3             | 3 | 0 | 0 | 3 |
| ECTOPIC PANCREATIC TISSUE IN SUBMUCOSA                  |           | Nad>                  | 3 | 0 | 0 | 3             | 3 | 0 | 0 | 3 |

Nad = No abnormalities detected  
Group 1:Vehicle

NOS = Not otherwise specified  
Group 2:50 mg/kg/day

Group 3:200 mg/kg/day

Group 4:800 mg/kg/day



CONFIDENTIAL

Table 13  
Expanded Incidence Summary for Microscopic Observations  
Test period  
Days 29 Interim Sacrifice

| Fexinidazole                                          |             | Study Number: 0505-2007 |           |   |   |   |               |   |   |   |
|-------------------------------------------------------|-------------|-------------------------|-----------|---|---|---|---------------|---|---|---|
| CONTROLS FROM GROUP(S): 1                             |             | ANIMAL SEX:             | M a l e s |   |   |   | F e m a l e s |   |   |   |
| T I S S U E S W I T H D I A G N O S E S               |             | DOSAGE GROUP:           | 1         | 2 | 3 | 4 | 1             | 2 | 3 | 4 |
|                                                       |             | NO. IN GROUP:           | 3         | 3 | 3 | 3 | 3             | 3 | 3 | 3 |
| DUODENUM                                              | (Continued) | NUMBER EXAMINED:        | 3         | 0 | 0 | 3 | 3             | 0 | 0 | 3 |
| CRYPT DILATATION WITH/WITHOUT LUMENAL NECROTIC DEBRIS |             | Nad>                    | 2         | 0 | 0 | 3 | 3             | 0 | 0 | 1 |
|                                                       |             | Minimal>                | 0         | 0 | 0 | 0 | 0             | 0 | 0 | 2 |
|                                                       |             | Slight>                 | 1         | 0 | 0 | 0 | 0             | 0 | 0 | 0 |
| EPIDIDYMIDES                                          |             | NUMBER EXAMINED:        | 3         | 0 | 0 | 3 | 0             | 0 | 0 | 0 |
| IMMATURE                                              |             | Nad>                    | 3         | 0 | 0 | 2 | 0             | 0 | 0 | 0 |
|                                                       |             | Present>                | 0         | 0 | 0 | 1 | 0             | 0 | 0 | 0 |
| LUMENAL GERM CELLS/DEBRIS                             |             | Nad>                    | 3         | 0 | 0 | 2 | 0             | 0 | 0 | 0 |
|                                                       |             | Minimal>                | 0         | 0 | 0 | 1 | 0             | 0 | 0 | 0 |
| ESOPHAGUS                                             |             | NUMBER EXAMINED:        | 3         | 0 | 0 | 3 | 3             | 0 | 0 | 3 |
| ACUTE INFLAMMATION                                    |             | Nad>                    | 3         | 0 | 0 | 2 | 3             | 0 | 0 | 3 |
|                                                       |             | Minimal>                | 0         | 0 | 0 | 1 | 0             | 0 | 0 | 0 |
| CHRONIC INFLAMMATION                                  |             | Nad>                    | 3         | 0 | 0 | 3 | 2             | 0 | 0 | 2 |
|                                                       |             | Minimal>                | 0         | 0 | 0 | 0 | 1             | 0 | 0 | 1 |
| EYES                                                  |             | NUMBER EXAMINED:        | 3         | 0 | 0 | 3 | 3             | 0 | 0 | 3 |
| FEMUR HEAD                                            |             | NUMBER EXAMINED:        | 3         | 0 | 0 | 3 | 3             | 0 | 0 | 3 |
| GALL BLADDER                                          |             | NUMBER EXAMINED:        | 3         | 0 | 0 | 3 | 3             | 0 | 0 | 3 |
| LYMPHOCYTIC INFILTRATION                              |             | Nad>                    | 1         | 0 | 0 | 0 | 0             | 0 | 0 | 0 |
|                                                       |             | Minimal>                | 2         | 0 | 0 | 2 | 2             | 0 | 0 | 2 |
|                                                       |             | Slight>                 | 0         | 0 | 0 | 1 | 1             | 0 | 0 | 1 |
| HEART                                                 |             | NUMBER EXAMINED:        | 3         | 0 | 0 | 3 | 3             | 0 | 0 | 3 |

Nad = No abnormalities detected      NOS = Not otherwise specified  
 Group 1:Vehicle      Group 2:50 mg/kg/day      Group 3:200 mg/kg/day      Group 4:800 mg/kg/day

CONFIDENTIAL

Table 13  
Expanded Incidence Summary for Microscopic Observations  
Test period  
Days 29 Interim Sacrifice

Fexinidazole

Study Number: 0505-2007

| CONTROLS FROM GROUP(S): 1                |           | ANIMAL SEX: M a l e s |   |   |   | F e m a l e s |   |   |   |   |
|------------------------------------------|-----------|-----------------------|---|---|---|---------------|---|---|---|---|
| T I S S U E S W I T H D I A G N O S E S  |           | DOSAGE GROUP:         | 1 | 2 | 3 | 4             | 1 | 2 | 3 | 4 |
|                                          |           | NO. IN GROUP:         | 3 | 3 | 3 | 3             | 3 | 3 | 3 | 3 |
| HEART (Continued)                        | . . . . . | NUMBER EXAMINED:      | 3 | 0 | 0 | 3             | 3 | 0 | 0 | 3 |
| ACUTE INFLAMMATION                       |           | Nad>                  | 3 | 0 | 0 | 2             | 3 | 0 | 0 | 3 |
|                                          |           | Minimal>              | 0 | 0 | 0 | 1             | 0 | 0 | 0 | 0 |
| MESOTHELIAL HYPERPLASIA, ATRIAL          |           | Nad>                  | 1 | 0 | 0 | 3             | 2 | 0 | 0 | 2 |
|                                          |           | Minimal>              | 1 | 0 | 0 | 0             | 0 | 0 | 0 | 0 |
|                                          |           | Slight>               | 1 | 0 | 0 | 0             | 1 | 0 | 0 | 1 |
| ARTERIAL MEDIAL HYPERTROPHY              |           | Nad>                  | 3 | 0 | 0 | 3             | 3 | 0 | 0 | 2 |
|                                          |           | Minimal>              | 0 | 0 | 0 | 0             | 0 | 0 | 0 | 1 |
| ILEUM                                    | . . . . . | NUMBER EXAMINED:      | 3 | 0 | 0 | 3             | 3 | 0 | 0 | 3 |
| JEJUNUM                                  | . . . . . | NUMBER EXAMINED:      | 3 | 0 | 0 | 3             | 3 | 0 | 0 | 3 |
| KIDNEYS                                  | . . . . . | NUMBER EXAMINED:      | 3 | 0 | 0 | 3             | 3 | 0 | 0 | 3 |
| CHRONIC INFLAMMATION                     |           | Nad>                  | 3 | 0 | 0 | 3             | 2 | 0 | 0 | 3 |
|                                          |           | Minimal>              | 0 | 0 | 0 | 0             | 1 | 0 | 0 | 0 |
| PAPILLARY MINERALIZATION                 |           | Nad>                  | 0 | 0 | 0 | 1             | 0 | 0 | 0 | 1 |
|                                          |           | Minimal>              | 3 | 0 | 0 | 2             | 3 | 0 | 0 | 2 |
| CORTICAL TUBULAR DILATION                |           | Nad>                  | 3 | 0 | 0 | 3             | 3 | 0 | 0 | 3 |
| CORTICAL FIBROSIS                        |           | Nad>                  | 3 | 0 | 0 | 3             | 3 | 0 | 0 | 3 |
| CORTICAL TUBULAR REGENERATIVE BASOPHILIA |           | Nad>                  | 3 | 0 | 0 | 3             | 3 | 0 | 0 | 3 |
| ATROPHY OF ADJACENT ADIPOSE TISSUE       |           | Nad>                  | 3 | 0 | 0 | 2             | 3 | 0 | 0 | 3 |
|                                          |           | Slight>               | 0 | 0 | 0 | 1             | 0 | 0 | 0 | 0 |
| LACRIMAL GLANDS                          | . . . . . | NUMBER EXAMINED:      | 3 | 0 | 0 | 3             | 3 | 0 | 0 | 3 |

Nad = No abnormalities detected  
Group 1:Vehicle

NOS = Not otherwise specified  
Group 2:50 mg/kg/day

Group 3:200 mg/kg/day

Group 4:800 mg/kg/day

CONFIDENTIAL

Table 13  
Expanded Incidence Summary for Microscopic Observations  
Test period  
Days 29 Interim Sacrifice

| Fexinidazole                             |                  | Study Number: 0505-2007 |   |   |   |               |   |   |   |   |
|------------------------------------------|------------------|-------------------------|---|---|---|---------------|---|---|---|---|
| CONTROLS FROM GROUP(S): 1                |                  | ANIMAL SEX: M a l e s   |   |   |   | F e m a l e s |   |   |   |   |
| T I S S U E S W I T H D I A G N O S E S  |                  | DOSAGE GROUP:           | 1 | 2 | 3 | 4             | 1 | 2 | 3 | 4 |
|                                          |                  | NO. IN GROUP:           | 3 | 3 | 3 | 3             | 3 | 3 | 3 | 3 |
| LACRIMAL GLANDS (Continued)              | NUMBER EXAMINED: | 3                       | 0 | 0 | 3 | 3             | 0 | 0 | 3 |   |
| ONLY ONE GLAND AVAILABLE FOR EXAMINATION |                  |                         |   |   |   |               |   |   |   |   |
|                                          | Nad>             | 2                       | 0 | 0 | 2 | 2             | 0 | 0 | 2 |   |
|                                          | Present>         | 1                       | 0 | 0 | 1 | 1             | 0 | 0 | 1 |   |
| LIVER                                    | NUMBER EXAMINED: | 3                       | 0 | 0 | 3 | 3             | 0 | 0 | 3 |   |
| CHRONIC INFLAMMATION                     |                  |                         |   |   |   |               |   |   |   |   |
|                                          | Nad>             | 1                       | 0 | 0 | 2 | 3             | 0 | 0 | 0 |   |
|                                          | Minimal>         | 2                       | 0 | 0 | 1 | 0             | 0 | 0 | 3 |   |
| GLYCOGEN DEPLETION                       |                  |                         |   |   |   |               |   |   |   |   |
|                                          | Nad>             | 3                       | 0 | 0 | 2 | 3             | 0 | 0 | 3 |   |
|                                          | Slight>          | 0                       | 0 | 0 | 1 | 0             | 0 | 0 | 0 |   |
| HEPATOCELLULAR VACUOLATION               |                  |                         |   |   |   |               |   |   |   |   |
|                                          | Nad>             | 3                       | 0 | 0 | 3 | 2             | 0 | 0 | 3 |   |
|                                          | Slight>          | 0                       | 0 | 0 | 0 | 1             | 0 | 0 | 0 |   |
| EXTRAMEDULLARY HEMATOPOIESIS             |                  |                         |   |   |   |               |   |   |   |   |
|                                          | Nad>             | 2                       | 0 | 0 | 3 | 2             | 0 | 0 | 3 |   |
|                                          | Minimal>         | 1                       | 0 | 0 | 0 | 1             | 0 | 0 | 0 |   |
| MANDIBULAR L.N.                          | NUMBER EXAMINED: | 3                       | 0 | 1 | 3 | 3             | 0 | 0 | 3 |   |
| SINUS ERYTHROCYTES/ERYTHROPHAGOCYTOSIS   |                  |                         |   |   |   |               |   |   |   |   |
|                                          | Nad>             | 3                       | 0 | 1 | 3 | 2             | 0 | 0 | 3 |   |
|                                          | Minimal>         | 0                       | 0 | 0 | 0 | 1             | 0 | 0 | 0 |   |
| MESENTERIC L.N.                          | NUMBER EXAMINED: | 3                       | 0 | 1 | 3 | 3             | 0 | 0 | 3 |   |
| SINUS ERYTHROCYTES/ERYTHROPHAGOCYTOSIS   |                  |                         |   |   |   |               |   |   |   |   |
|                                          | Nad>             | 1                       | 0 | 1 | 2 | 0             | 0 | 0 | 1 |   |
|                                          | Minimal>         | 1                       | 0 | 0 | 1 | 3             | 0 | 0 | 2 |   |
|                                          | Slight>          | 1                       | 0 | 0 | 0 | 0             | 0 | 0 | 0 |   |
| LUNG                                     | NUMBER EXAMINED: | 3                       | 0 | 0 | 3 | 3             | 0 | 0 | 3 |   |

Nad = No abnormalities detected      NOS = Not otherwise specified  
 Group 1:Vehicle      Group 2:50 mg/kg/day      Group 3:200 mg/kg/day      Group 4:800 mg/kg/day

CONFIDENTIAL

Table 13  
Expanded Incidence Summary for Microscopic Observations  
Test period  
Days 29 Interim Sacrifice

Fexinidazole

Study Number: 0505-2007

| CONTROLS FROM GROUP(S): 1               |                  | ANIMAL SEX: M a l e s |   |   |   | F e m a l e s |   |   |   |   |
|-----------------------------------------|------------------|-----------------------|---|---|---|---------------|---|---|---|---|
| T I S S U E S W I T H D I A G N O S E S |                  | DOSAGE GROUP:         | 1 | 2 | 3 | 4             | 1 | 2 | 3 | 4 |
|                                         |                  | NO. IN GROUP:         | 3 | 3 | 3 | 3             | 3 | 3 | 3 | 3 |
| LUNG (Continued)                        | NUMBER EXAMINED: | 3                     | 0 | 0 | 3 | 3             | 0 | 0 | 3 | 3 |
| ALVEOLAR HEMORRHAGE                     | Nad>             | 3                     | 0 | 0 | 3 | 3             | 0 | 0 | 3 | 3 |
| ACUTE INFLAMMATION                      | Nad>             | 3                     | 0 | 0 | 3 | 1             | 0 | 0 | 2 | 2 |
|                                         | Minimal>         | 0                     | 0 | 0 | 0 | 2             | 0 | 0 | 1 | 1 |
| CHRONIC INFLAMMATION                    | Nad>             | 2                     | 0 | 0 | 3 | 2             | 0 | 0 | 3 | 3 |
|                                         | Minimal>         | 0                     | 0 | 0 | 0 | 1             | 0 | 0 | 0 | 0 |
|                                         | Slight>          | 1                     | 0 | 0 | 0 | 0             | 0 | 0 | 0 | 0 |
| ALVEOLAR MACROPHAGE INFILTRATION        | Nad>             | 1                     | 0 | 0 | 1 | 0             | 0 | 0 | 0 | 0 |
|                                         | Minimal>         | 2                     | 0 | 0 | 2 | 3             | 0 | 0 | 2 | 2 |
|                                         | Slight>          | 0                     | 0 | 0 | 0 | 0             | 0 | 0 | 1 | 1 |
| BRONCHOPNEUMONIA                        | Nad>             | 3                     | 0 | 0 | 3 | 3             | 0 | 0 | 2 | 2 |
|                                         | Slight>          | 0                     | 0 | 0 | 0 | 0             | 0 | 0 | 1 | 1 |
| CAPILLARY ANGIOMATOSIS                  | Nad>             | 3                     | 0 | 0 | 3 | 3             | 0 | 0 | 3 | 3 |
| MAMMARY GLAND                           | NUMBER EXAMINED: | 3                     | 0 | 0 | 3 | 3             | 3 | 3 | 3 | 3 |
| NO MAMMARY TISSUE IN THE SECTION        | Nad>             | 0                     | 0 | 0 | 0 | 0             | 3 | 3 | 3 | 3 |
|                                         | Present>         | 3                     | 0 | 0 | 3 | 3             | 0 | 0 | 0 | 0 |
| IMMATURE                                | Nad>             | 3                     | 0 | 0 | 3 | 3             | 2 | 3 | 3 | 3 |
|                                         | Present>         | 0                     | 0 | 0 | 0 | 0             | 1 | 0 | 0 | 0 |
| EDEMA                                   | Nad>             | 3                     | 0 | 0 | 3 | 3             | 1 | 0 | 1 | 1 |
|                                         | Minimal>         | 0                     | 0 | 0 | 0 | 0             | 1 | 1 | 0 | 0 |
|                                         | Slight>          | 0                     | 0 | 0 | 0 | 0             | 1 | 1 | 2 | 2 |
|                                         | Moderate>        | 0                     | 0 | 0 | 0 | 0             | 0 | 1 | 0 | 0 |

Nad = No abnormalities detected  
Group 1: Vehicle

NOS = Not otherwise specified  
Group 2: 50 mg/kg/day

Group 3: 200 mg/kg/day

Group 4: 800 mg/kg/day

CONFIDENTIAL

Table 13  
Expanded Incidence Summary for Microscopic Observations  
Test period  
Days 29 Interim Sacrifice

| Fexinidazole                            |           | Study Number: 0505-2007 |           |   |   |   |               |   |   |   |
|-----------------------------------------|-----------|-------------------------|-----------|---|---|---|---------------|---|---|---|
| CONTROLS FROM GROUP(S): 1               |           | ANIMAL SEX:             | M a l e s |   |   |   | F e m a l e s |   |   |   |
| T I S S U E S W I T H D I A G N O S E S |           | DOSAGE GROUP:           | 1         | 2 | 3 | 4 | 1             | 2 | 3 | 4 |
|                                         |           | NO. IN GROUP:           | 3         | 3 | 3 | 3 | 3             | 3 | 3 | 3 |
| MAMMARY GLAND (Continued)               | . . . . . | NUMBER EXAMINED:        | 3         | 0 | 0 | 3 | 3             | 3 | 3 | 3 |
| STROMAL PROLIFERATION                   |           | Nad>                    | 3         | 0 | 0 | 3 | 3             | 1 | 0 | 1 |
|                                         |           | Minimal>                | 0         | 0 | 0 | 0 | 0             | 1 | 0 | 0 |
|                                         |           | Slight>                 | 0         | 0 | 0 | 0 | 0             | 0 | 2 | 2 |
|                                         |           | Moderate>               | 0         | 0 | 0 | 0 | 0             | 1 | 1 | 0 |
| DUCTAL-ALVEOLAR HYPERPLASIA             |           | Nad>                    | 3         | 0 | 0 | 3 | 3             | 1 | 0 | 1 |
|                                         |           | Minimal>                | 0         | 0 | 0 | 0 | 0             | 1 | 1 | 1 |
|                                         |           | Slight>                 | 0         | 0 | 0 | 0 | 0             | 1 | 1 | 1 |
|                                         |           | Moderate>               | 0         | 0 | 0 | 0 | 0             | 0 | 1 | 0 |
| LOBULAR HYPERPLASIA                     |           | Nad>                    | 3         | 0 | 0 | 3 | 3             | 3 | 3 | 2 |
|                                         |           | Slight>                 | 0         | 0 | 0 | 0 | 0             | 0 | 0 | 1 |
| SECRETORY ACTIVITY                      |           | Nad>                    | 3         | 0 | 0 | 3 | 3             | 3 | 3 | 2 |
|                                         |           | Slight>                 | 0         | 0 | 0 | 0 | 0             | 0 | 0 | 1 |
| SKELETAL MUSCLE                         | . . . . . | NUMBER EXAMINED:        | 3         | 0 | 0 | 3 | 3             | 0 | 0 | 3 |
| CHRONIC INFLAMMATION                    |           | Nad>                    | 3         | 0 | 0 | 3 | 3             | 0 | 0 | 3 |
| SCIATIC NERVE                           | . . . . . | NUMBER EXAMINED:        | 3         | 0 | 0 | 3 | 3             | 0 | 0 | 3 |
| OPTIC NERVES                            | . . . . . | NUMBER EXAMINED:        | 3         | 0 | 0 | 3 | 3             | 0 | 0 | 3 |
| OVARIES                                 | . . . . . | NUMBER EXAMINED:        | 0         | 0 | 0 | 0 | 3             | 3 | 3 | 3 |
| IMMATURE                                |           | Nad>                    | 0         | 0 | 0 | 0 | 0             | 3 | 3 | 3 |
|                                         |           | Present>                | 0         | 0 | 0 | 0 | 3             | 0 | 0 | 0 |
| CORPORA LUTEA                           |           | Nad>                    | 0         | 0 | 0 | 0 | 3             | 1 | 0 | 0 |
|                                         |           | Present>                | 0         | 0 | 0 | 0 | 0             | 2 | 3 | 3 |

Nad = No abnormalities detected      NOS = Not otherwise specified  
 Group 1:Vehicle      Group 2:50 mg/kg/day      Group 3:200 mg/kg/day      Group 4:800 mg/kg/day

CONFIDENTIAL

Table 13  
Expanded Incidence Summary for Microscopic Observations  
Test period  
Days 29 Interim Sacrifice

Fexinidazole

Study Number: 0505-2007

| CONTROLS FROM GROUP(S): 1                      |           | ANIMAL SEX: M a l e s |   |   |   | F e m a l e s |   |   |   |   |
|------------------------------------------------|-----------|-----------------------|---|---|---|---------------|---|---|---|---|
| T I S S U E S W I T H D I A G N O S E S        |           | DOSAGE GROUP:         | 1 | 2 | 3 | 4             | 1 | 2 | 3 | 4 |
|                                                |           | NO. IN GROUP:         | 3 | 3 | 3 | 3             | 3 | 3 | 3 | 3 |
| OVARIES (Continued)                            | . . . . . | NUMBER EXAMINED:      | 0 | 0 | 0 | 0             | 3 | 3 | 3 | 3 |
| CYSTS                                          |           | Nad>                  | 0 | 0 | 0 | 0             | 3 | 3 | 3 | 3 |
| PANCREAS                                       | . . . . . | NUMBER EXAMINED:      | 3 | 0 | 0 | 3             | 3 | 0 | 0 | 3 |
| ACINAR DEGRANULATION                           |           | Nad>                  | 3 | 0 | 0 | 2             | 3 | 0 | 0 | 3 |
|                                                |           | Minimal>              | 0 | 0 | 0 | 1             | 0 | 0 | 0 | 0 |
| ACINAR APOPTOSIS                               |           | Nad>                  | 3 | 0 | 0 | 3             | 3 | 0 | 0 | 3 |
| PITUITARY                                      | . . . . . | NUMBER EXAMINED:      | 3 | 0 | 0 | 3             | 3 | 0 | 0 | 3 |
| CYSTS, PARS DISTALIS                           |           | Nad>                  | 1 | 0 | 0 | 3             | 2 | 0 | 0 | 3 |
|                                                |           | Minimal>              | 0 | 0 | 0 | 0             | 1 | 0 | 0 | 0 |
|                                                |           | Slight>               | 2 | 0 | 0 | 0             | 0 | 0 | 0 | 0 |
| CRANIOPHARINGEAL CYSTS                         |           | Nad>                  | 3 | 0 | 0 | 3             | 3 | 0 | 0 | 3 |
| PROSTATE                                       | . . . . . | NUMBER EXAMINED:      | 3 | 0 | 0 | 3             | 0 | 0 | 0 | 0 |
| IMMATURE                                       |           | Nad>                  | 3 | 0 | 0 | 2             | 0 | 0 | 0 | 0 |
|                                                |           | Present>              | 0 | 0 | 0 | 1             | 0 | 0 | 0 | 0 |
| PARATHYROIDS                                   | . . . . . | NUMBER EXAMINED:      | 3 | 0 | 0 | 3             | 3 | 0 | 0 | 3 |
| ONLY ONE PARATHYROID AVAILABLE FOR EXAMINATION |           | Nad>                  | 1 | 0 | 0 | 2             | 0 | 0 | 0 | 0 |
|                                                |           | Present>              | 2 | 0 | 0 | 1             | 3 | 0 | 0 | 3 |
| CYSTS                                          |           | Nad>                  | 3 | 0 | 0 | 2             | 2 | 0 | 0 | 2 |
|                                                |           | Minimal>              | 0 | 0 | 0 | 1             | 1 | 0 | 0 | 1 |
| SPINAL CORD-CERV.                              | . . . . . | NUMBER EXAMINED:      | 3 | 0 | 0 | 3             | 3 | 0 | 0 | 3 |
| STAGE OF ESTRUS                                | . . . . . | NUMBER EXAMINED:      | 0 | 0 | 0 | 0             | 3 | 3 | 3 | 3 |

Nad = No abnormalities detected      NOS = Not otherwise specified  
Group 1:Vehicle      Group 2:50 mg/kg/day      Group 3:200 mg/kg/day      Group 4:800 mg/kg/day

CONFIDENTIAL

Table 13  
Expanded Incidence Summary for Microscopic Observations  
Test period  
Days 29 Interim Sacrifice

Fexinidazole

Study Number: 0505-2007

| CONTROLS FROM GROUP(S): 1               |           | ANIMAL SEX: M a l e s |   |   |   | F e m a l e s |   |   |   |   |
|-----------------------------------------|-----------|-----------------------|---|---|---|---------------|---|---|---|---|
| T I S S U E S W I T H D I A G N O S E S |           | DOSAGE GROUP:         | 1 | 2 | 3 | 4             | 1 | 2 | 3 | 4 |
|                                         |           | NO. IN GROUP:         | 3 | 3 | 3 | 3             | 3 | 3 | 3 | 3 |
| STAGE OF ESTRUS (Continued)             | . . . . . | NUMBER EXAMINED:      | 0 | 0 | 0 | 0             | 3 | 3 | 3 | 3 |
| IMMATURE                                |           | Nad>                  | 0 | 0 | 0 | 0             | 0 | 3 | 3 | 3 |
|                                         |           | Present>              | 0 | 0 | 0 | 0             | 3 | 0 | 0 | 0 |
| PROESTRUS                               |           | Nad>                  | 0 | 0 | 0 | 0             | 3 | 3 | 3 | 3 |
| ESTRUS                                  |           | Nad>                  | 0 | 0 | 0 | 0             | 3 | 2 | 3 | 3 |
|                                         |           | Present>              | 0 | 0 | 0 | 0             | 0 | 1 | 0 | 0 |
| METESTRUS                               |           | Nad>                  | 0 | 0 | 0 | 0             | 3 | 3 | 3 | 2 |
|                                         |           | Present>              | 0 | 0 | 0 | 0             | 0 | 0 | 0 | 1 |
| DIESTRUS                                |           | Nad>                  | 0 | 0 | 0 | 0             | 3 | 1 | 0 | 1 |
|                                         |           | Present>              | 0 | 0 | 0 | 0             | 0 | 2 | 3 | 2 |
| ANESTRUS                                |           | Nad>                  | 0 | 0 | 0 | 0             | 3 | 3 | 3 | 3 |
| MANDIBULAR S.G.                         | . . . . . | NUMBER EXAMINED:      | 3 | 0 | 0 | 3             | 3 | 0 | 0 | 3 |
| LYMPHOCYTIC INFILTRATION                |           | Nad>                  | 3 | 0 | 0 | 3             | 2 | 0 | 0 | 2 |
|                                         |           | Minimal>              | 0 | 0 | 0 | 0             | 1 | 0 | 0 | 0 |
|                                         |           | Slight>               | 0 | 0 | 0 | 0             | 0 | 0 | 0 | 1 |
| PAROTIDS                                | . . . . . | NUMBER EXAMINED:      | 3 | 0 | 0 | 3             | 3 | 0 | 0 | 3 |
| LYMPHOCYTIC INFILTRATION                |           | Nad>                  | 3 | 0 | 0 | 3             | 3 | 0 | 0 | 2 |
|                                         |           | Minimal>              | 0 | 0 | 0 | 0             | 0 | 0 | 0 | 1 |
| ACINAR ATROPHY                          |           | Nad>                  | 2 | 0 | 0 | 1             | 1 | 0 | 0 | 3 |
|                                         |           | Minimal>              | 1 | 0 | 0 | 2             | 2 | 0 | 0 | 0 |
| SKIN                                    | . . . . . | NUMBER EXAMINED:      | 3 | 0 | 0 | 3             | 3 | 0 | 0 | 3 |

Nad = No abnormalities detected  
Group 1:Vehicle

NOS = Not otherwise specified  
Group 2:50 mg/kg/day

Group 3:200 mg/kg/day

Group 4:800 mg/kg/day

CONFIDENTIAL

Table 13  
Expanded Incidence Summary for Microscopic Observations  
Test period  
Days 29 Interim Sacrifice

Fexinidazole

Study Number: 0505-2007

| CONTROLS FROM GROUP(S): 1               |           | ANIMAL SEX: M a l e s |   |   |   | F e m a l e s |   |   |   |   |
|-----------------------------------------|-----------|-----------------------|---|---|---|---------------|---|---|---|---|
| T I S S U E S W I T H D I A G N O S E S |           | DOSAGE GROUP:         | 1 | 2 | 3 | 4             | 1 | 2 | 3 | 4 |
|                                         |           | NO. IN GROUP:         | 3 | 3 | 3 | 3             | 3 | 3 | 3 | 3 |
| SKIN (Continued)                        | . . . . . | NUMBER EXAMINED:      | 3 | 0 | 0 | 3             | 3 | 0 | 0 | 3 |
| CHRONIC INFLAMMATION                    |           | Nad>                  | 2 | 0 | 0 | 3             | 3 | 0 | 0 | 3 |
|                                         |           | Minimal>              | 1 | 0 | 0 | 0             | 0 | 0 | 0 | 0 |
| SPLEEN                                  | . . . . . | NUMBER EXAMINED:      | 3 | 0 | 0 | 3             | 3 | 0 | 0 | 3 |
| EXTRAMEDULLARY HEMATOPOIESIS            |           | Nad>                  | 3 | 0 | 0 | 3             | 3 | 0 | 0 | 3 |
| STOMACH                                 | . . . . . | NUMBER EXAMINED:      | 3 | 0 | 0 | 3             | 3 | 0 | 0 | 3 |
| ACUTE INFLAMMATION                      |           | Nad>                  | 3 | 0 | 0 | 3             | 3 | 0 | 0 | 3 |
| GASTRITIS                               |           | Nad>                  | 3 | 0 | 0 | 3             | 3 | 0 | 0 | 3 |
| STERNUM                                 | . . . . . | NUMBER EXAMINED:      | 3 | 0 | 0 | 3             | 3 | 0 | 0 | 3 |
| TESTES                                  | . . . . . | NUMBER EXAMINED:      | 3 | 0 | 1 | 3             | 0 | 0 | 0 | 0 |
| IMMATURE                                |           | Nad>                  | 3 | 0 | 0 | 2             | 0 | 0 | 0 | 0 |
|                                         |           | Present>              | 0 | 0 | 1 | 1             | 0 | 0 | 0 | 0 |
| SEGMENTAL HYPOPLASIA                    |           | Nad>                  | 2 | 0 | 1 | 2             | 0 | 0 | 0 | 0 |
|                                         |           | Minimal>              | 0 | 0 | 0 | 1             | 0 | 0 | 0 | 0 |
|                                         |           | Slight>               | 1 | 0 | 0 | 0             | 0 | 0 | 0 | 0 |
| THYROIDS                                | . . . . . | NUMBER EXAMINED:      | 3 | 0 | 0 | 3             | 3 | 0 | 0 | 3 |
| CYSTIC FOLLICLES                        |           | Nad>                  | 3 | 0 | 0 | 3             | 3 | 0 | 0 | 3 |
| THYMUS                                  | . . . . . | NUMBER EXAMINED:      | 3 | 0 | 0 | 2             | 3 | 0 | 0 | 3 |

Nad = No abnormalities detected  
Group 1:Vehicle

NOS = Not otherwise specified  
Group 2:50 mg/kg/day

Group 3:200 mg/kg/day

Group 4:800 mg/kg/day



CONFIDENTIAL

Table 13  
Expanded Incidence Summary for Microscopic Observations  
Test period  
Days 29 Interim Sacrifice

Fexinidazole

Study Number: 0505-2007

| CONTROLS FROM GROUP(S): 1               |             | ANIMAL SEX: M a l e s |   |   |   | F e m a l e s |   |   |   |   |
|-----------------------------------------|-------------|-----------------------|---|---|---|---------------|---|---|---|---|
| T I S S U E S W I T H D I A G N O S E S |             | DOSAGE GROUP:         | 1 | 2 | 3 | 4             | 1 | 2 | 3 | 4 |
|                                         |             | NO. IN GROUP:         | 3 | 3 | 3 | 3             | 3 | 3 | 3 | 3 |
| THYMUS                                  | (Continued) | NUMBER EXAMINED:      | 3 | 0 | 0 | 2             | 3 | 0 | 0 | 3 |
| CYSTS                                   |             | Nad>                  | 2 | 0 | 0 | 1             | 2 | 0 | 0 | 2 |
|                                         |             | Minimal>              | 1 | 0 | 0 | 0             | 1 | 0 | 0 | 0 |
|                                         |             | Slight>               | 0 | 0 | 0 | 1             | 0 | 0 | 0 | 1 |
| INVOLUTION                              |             | Nad>                  | 1 | 0 | 0 | 0             | 0 | 0 | 0 | 0 |
|                                         |             | Slight>               | 2 | 0 | 0 | 1             | 0 | 0 | 0 | 0 |
|                                         |             | Moderate>             | 0 | 0 | 0 | 0             | 2 | 0 | 0 | 0 |
|                                         |             | Marked>               | 0 | 0 | 0 | 0             | 1 | 0 | 0 | 3 |
|                                         |             | Severe>               | 0 | 0 | 0 | 1             | 0 | 0 | 0 | 0 |
| TONGUE                                  |             | NUMBER EXAMINED:      | 3 | 0 | 0 | 3             | 3 | 0 | 0 | 3 |
| ACUTE INFLAMMATION                      |             | Nad>                  | 3 | 0 | 0 | 2             | 3 | 0 | 0 | 3 |
|                                         |             | Minimal>              | 0 | 0 | 0 | 1             | 0 | 0 | 0 | 0 |
| CHRONIC INFLAMMATION                    |             | Nad>                  | 3 | 0 | 0 | 3             | 2 | 0 | 0 | 3 |
|                                         |             | Minimal>              | 0 | 0 | 0 | 0             | 1 | 0 | 0 | 0 |
| TRACHEA                                 |             | NUMBER EXAMINED:      | 3 | 0 | 0 | 3             | 3 | 0 | 0 | 3 |
| ACUTE INFLAMMATION                      |             | Nad>                  | 3 | 0 | 0 | 3             | 2 | 0 | 0 | 3 |
|                                         |             | Minimal>              | 0 | 0 | 0 | 0             | 1 | 0 | 0 | 0 |
| URINARY BLADDER                         |             | NUMBER EXAMINED:      | 3 | 0 | 0 | 3             | 3 | 0 | 0 | 2 |
| MINERALIZATION IN MUSCULARIS/SUBSEROSA  |             | Nad>                  | 2 | 0 | 0 | 3             | 3 | 0 | 0 | 2 |
|                                         |             | Slight>               | 1 | 0 | 0 | 0             | 0 | 0 | 0 | 0 |
| UTERUS                                  |             | NUMBER EXAMINED:      | 0 | 0 | 0 | 0             | 3 | 3 | 3 | 3 |
| IMMATURE                                |             | Nad>                  | 0 | 0 | 0 | 0             | 1 | 3 | 3 | 3 |
|                                         |             | Present>              | 0 | 0 | 0 | 0             | 2 | 0 | 0 | 0 |

Nad = No abnormalities detected  
Group 1: Vehicle

NOS = Not otherwise specified  
Group 2: 50 mg/kg/day

Group 3: 200 mg/kg/day

Group 4: 800 mg/kg/day

CONFIDENTIAL

Table 13  
Expanded Incidence Summary for Microscopic Observations  
Test period  
Days 29 Interim Sacrifice

Fexinidazole

Study Number: 0505-2007

| CONTROLS FROM GROUP(S): 1                          |             | ANIMAL SEX:      | M a l e s |   |   |   | F e m a l e s |   |   |   |
|----------------------------------------------------|-------------|------------------|-----------|---|---|---|---------------|---|---|---|
| T I S S U E S    W I T H    D I A G N O S E S      |             | DOSAGE GROUP:    | 1         | 2 | 3 | 4 | 1             | 2 | 3 | 4 |
|                                                    |             | NO. IN GROUP:    | 3         | 3 | 3 | 3 | 3             | 3 | 3 | 3 |
| UTERUS                                             | (Continued) | NUMBER EXAMINED: | 0         | 0 | 0 | 0 | 3             | 3 | 3 | 3 |
| ENDOMETRIAL GLAND HYPERTROPHY/HYPERPLASIA          |             | Nad>             | 0         | 0 | 0 | 0 | 3             | 0 | 1 | 1 |
|                                                    |             | Minimal>         | 0         | 0 | 0 | 0 | 0             | 2 | 0 | 0 |
|                                                    |             | Slight>          | 0         | 0 | 0 | 0 | 0             | 0 | 1 | 1 |
|                                                    |             | Moderate>        | 0         | 0 | 0 | 0 | 0             | 1 | 1 | 1 |
| EOSINOPHILIC SECRETORY MATERIAL IN GLANDULAR LUMEN |             | Nad>             | 0         | 0 | 0 | 0 | 3             | 2 | 1 | 2 |
|                                                    |             | Minimal>         | 0         | 0 | 0 | 0 | 0             | 1 | 2 | 0 |
|                                                    |             | Slight>          | 0         | 0 | 0 | 0 | 0             | 0 | 0 | 1 |
| VAGINA                                             |             | NUMBER EXAMINED: | 0         | 0 | 0 | 0 | 3             | 3 | 1 | 3 |

Nad = No abnormalities detected  
Group 1:Vehicle

NOS = Not otherwise specified  
Group 2:50 mg/kg/day

Group 3:200 mg/kg/day

Group 4:800 mg/kg/day

CONFIDENTIAL

Table 13  
Expanded Incidence Summary for Microscopic Observations  
Test period  
Days 43 Final Sacrifice

Fexinidazole

Study Number: 0505-2007

| CONTROLS FROM GROUP(S): 1                               |           | ANIMAL SEX: M a l e s |   |   |   | F e m a l e s |   |   |   |   |
|---------------------------------------------------------|-----------|-----------------------|---|---|---|---------------|---|---|---|---|
| T I S S U E S W I T H D I A G N O S E S                 |           | DOSAGE GROUP:         | 1 | 2 | 3 | 4             | 1 | 2 | 3 | 4 |
|                                                         |           | NO. IN GROUP:         | 2 | 0 | 0 | 2             | 2 | 0 | 0 | 2 |
| ADRENALS                                                | . . . . . | .NUMBER EXAMINED:     | 2 | 0 | 0 | 2             | 2 | 0 | 0 | 2 |
| AORTA-THORACIC                                          | . . . . . | .NUMBER EXAMINED:     | 2 | 0 | 0 | 2             | 2 | 0 | 0 | 2 |
| ECTOPIC THYROID                                         |           | Nad>                  | 2 | 0 | 0 | 2             | 2 | 0 | 0 | 2 |
| BONE MARROW                                             | . . . . . | .NUMBER EXAMINED:     | 2 | 0 | 0 | 2             | 2 | 0 | 0 | 2 |
| REDUCED CELLULARITY                                     |           | Nad>                  | 2 | 0 | 0 | 2             | 2 | 0 | 0 | 2 |
| ATROPHY OF ADIPOSE TISSUE IN STERNAL AND FEMORAL MARROW |           | Nad>                  | 2 | 0 | 0 | 2             | 2 | 0 | 0 | 2 |
| BRAIN                                                   | . . . . . | .NUMBER EXAMINED:     | 2 | 0 | 0 | 2             | 2 | 0 | 0 | 2 |
| CECUM                                                   | . . . . . | .NUMBER EXAMINED:     | 2 | 0 | 0 | 2             | 2 | 0 | 0 | 2 |
| COLON                                                   | . . . . . | .NUMBER EXAMINED:     | 2 | 0 | 0 | 2             | 2 | 0 | 0 | 2 |
| CRYPT DILATATION WITH/WITHOUT LUMENAL NECROTIC DEBRIS   |           | Nad>                  | 2 | 0 | 0 | 2             | 2 | 0 | 0 | 2 |
| DIAPHRAGM                                               | . . . . . | .NUMBER EXAMINED:     | 2 | 0 | 0 | 2             | 2 | 0 | 0 | 2 |
| DUODENUM                                                | . . . . . | .NUMBER EXAMINED:     | 2 | 0 | 0 | 2             | 2 | 0 | 0 | 2 |
| ECTOPIC PANCREATIC TISSUE IN SUBMUCOSA                  |           | Nad>                  | 2 | 0 | 0 | 2             | 2 | 0 | 0 | 1 |
|                                                         |           | Present>              | 0 | 0 | 0 | 0             | 0 | 0 | 0 | 1 |
| CRYPT DILATATION WITH/WITHOUT LUMENAL NECROTIC DEBRIS   |           | Nad>                  | 1 | 0 | 0 | 1             | 2 | 0 | 0 | 2 |
|                                                         |           | Minimal>              | 1 | 0 | 0 | 1             | 0 | 0 | 0 | 0 |
| EPIDIDYMIDES                                            | . . . . . | .NUMBER EXAMINED:     | 2 | 0 | 0 | 2             | 0 | 0 | 0 | 0 |
| IMMATURE                                                |           | Nad>                  | 2 | 0 | 0 | 2             | 0 | 0 | 0 | 0 |

Nad = No abnormalities detected  
Group 1:Vehicle

NOS = Not otherwise specified  
Group 2:50 mg/kg/day

Group 3:200 mg/kg/day

Group 4:800 mg/kg/day

CONFIDENTIAL

Table 13  
Expanded Incidence Summary for Microscopic Observations  
Test period  
Days 43 Final Sacrifice

Fexinidazole

Study Number: 0505-2007

| CONTROLS FROM GROUP(S): 1               |           | ANIMAL SEX: M a l e s |   |   |   | F e m a l e s |   |   |   |   |
|-----------------------------------------|-----------|-----------------------|---|---|---|---------------|---|---|---|---|
| T I S S U E S W I T H D I A G N O S E S |           | DOSAGE GROUP:         | 1 | 2 | 3 | 4             | 1 | 2 | 3 | 4 |
|                                         |           | NO. IN GROUP:         | 2 | 0 | 0 | 2             | 2 | 0 | 0 | 2 |
| EPIDIDYMIDES (Continued)                | . . . . . | NUMBER EXAMINED:      | 2 | 0 | 0 | 2             | 0 | 0 | 0 | 0 |
| LUMENAL GERM CELLS/DEBRIS               |           | Nad>                  | 2 | 0 | 0 | 2             | 0 | 0 | 0 | 0 |
| ESOPHAGUS                               | . . . . . | NUMBER EXAMINED:      | 2 | 0 | 0 | 2             | 2 | 0 | 0 | 2 |
| ACUTE INFLAMMATION                      |           | Nad>                  | 2 | 0 | 0 | 2             | 2 | 0 | 0 | 2 |
| CHRONIC INFLAMMATION                    |           | Nad>                  | 2 | 0 | 0 | 2             | 2 | 0 | 0 | 2 |
| EYES                                    | . . . . . | NUMBER EXAMINED:      | 2 | 0 | 0 | 2             | 2 | 0 | 0 | 2 |
| FEMUR HEAD                              | . . . . . | NUMBER EXAMINED:      | 2 | 0 | 0 | 2             | 2 | 0 | 0 | 2 |
| GALL BLADDER                            | . . . . . | NUMBER EXAMINED:      | 2 | 0 | 0 | 2             | 2 | 0 | 0 | 2 |
| Lymphocytic Infiltration                |           | Nad>                  | 0 | 0 | 0 | 0             | 0 | 0 | 0 | 1 |
|                                         |           | Minimal>              | 2 | 0 | 0 | 2             | 1 | 0 | 0 | 1 |
|                                         |           | Slight>               | 0 | 0 | 0 | 0             | 1 | 0 | 0 | 0 |
| HEART                                   | . . . . . | NUMBER EXAMINED:      | 2 | 0 | 0 | 2             | 2 | 0 | 0 | 2 |
| ACUTE INFLAMMATION                      |           | Nad>                  | 2 | 0 | 0 | 2             | 2 | 0 | 0 | 2 |
| Mesothelial Hyperplasia, Atrial         |           | Nad>                  | 1 | 0 | 0 | 2             | 2 | 0 | 0 | 1 |
|                                         |           | Minimal>              | 1 | 0 | 0 | 0             | 0 | 0 | 0 | 1 |
| Arterial Medial Hypertrophy             |           | Nad>                  | 2 | 0 | 0 | 2             | 2 | 0 | 0 | 2 |
| ILEUM                                   | . . . . . | NUMBER EXAMINED:      | 2 | 0 | 0 | 2             | 2 | 0 | 0 | 2 |
| JEJUNUM                                 | . . . . . | NUMBER EXAMINED:      | 2 | 0 | 0 | 2             | 2 | 0 | 0 | 2 |
| KIDNEYS                                 | . . . . . | NUMBER EXAMINED:      | 2 | 0 | 0 | 2             | 2 | 0 | 0 | 2 |

Nad = No abnormalities detected  
Group 1: Vehicle

NOS = Not otherwise specified  
Group 2: 50 mg/kg/day

Group 3: 200 mg/kg/day

Group 4: 800 mg/kg/day

CONFIDENTIAL

Table 13  
Expanded Incidence Summary for Microscopic Observations  
Test period  
Days 43 Final Sacrifice

Fexinidazole

Study Number: 0505-2007

| CONTROLS FROM GROUP(S): 1                |                  | ANIMAL SEX: M a l e s |   |   |   | F e m a l e s |   |   |   |   |
|------------------------------------------|------------------|-----------------------|---|---|---|---------------|---|---|---|---|
| T I S S U E S W I T H D I A G N O S E S  |                  | DOSAGE GROUP:         | 1 | 2 | 3 | 4             | 1 | 2 | 3 | 4 |
|                                          |                  | NO. IN GROUP:         | 2 | 0 | 0 | 2             | 2 | 0 | 0 | 2 |
| KIDNEYS (Continued)                      | NUMBER EXAMINED: | 2                     | 0 | 0 | 2 | 2             | 0 | 0 | 2 |   |
| CHRONIC INFLAMMATION                     | Nad>             | 1                     | 0 | 0 | 2 | 1             | 0 | 0 | 1 |   |
|                                          | Minimal>         | 0                     | 0 | 0 | 0 | 1             | 0 | 0 | 1 |   |
|                                          | Slight>          | 1                     | 0 | 0 | 0 | 0             | 0 | 0 | 0 |   |
| PAPILLARY MINERALIZATION                 | Nad>             | 0                     | 0 | 0 | 1 | 0             | 0 | 0 | 0 |   |
|                                          | Minimal>         | 2                     | 0 | 0 | 1 | 2             | 0 | 0 | 2 |   |
| CORTICAL TUBULAR DILATION                | Nad>             | 1                     | 0 | 0 | 2 | 1             | 0 | 0 | 2 |   |
|                                          | Minimal>         | 0                     | 0 | 0 | 0 | 1             | 0 | 0 | 0 |   |
|                                          | Moderate>        | 1                     | 0 | 0 | 0 | 0             | 0 | 0 | 0 |   |
| CORTICAL FIBROSIS                        | Nad>             | 2                     | 0 | 0 | 2 | 1             | 0 | 0 | 2 |   |
|                                          | Minimal>         | 0                     | 0 | 0 | 0 | 1             | 0 | 0 | 0 |   |
| CORTICAL TUBULAR REGENERATIVE BASOPHILIA | Nad>             | 0                     | 0 | 0 | 1 | 1             | 0 | 0 | 2 |   |
|                                          | Minimal>         | 1                     | 0 | 0 | 1 | 0             | 0 | 0 | 0 |   |
|                                          | Slight>          | 1                     | 0 | 0 | 0 | 1             | 0 | 0 | 0 |   |
| ATROPHY OF ADJACENT ADIPOSE TISSUE       | Nad>             | 2                     | 0 | 0 | 2 | 2             | 0 | 0 | 2 |   |
| LACRIMAL GLANDS . . . . .                | NUMBER EXAMINED: | 2                     | 0 | 0 | 2 | 2             | 0 | 0 | 2 |   |
| ONLY ONE GLAND AVAILABLE FOR EXAMINATION | Nad>             | 2                     | 0 | 0 | 2 | 2             | 0 | 0 | 2 |   |
| LIVER . . . . .                          | NUMBER EXAMINED: | 2                     | 0 | 0 | 2 | 2             | 0 | 0 | 2 |   |
| CHRONIC INFLAMMATION                     | Nad>             | 2                     | 0 | 0 | 2 | 2             | 0 | 0 | 2 |   |
| GLYCOGEN DEPLETION                       | Nad>             | 2                     | 0 | 0 | 2 | 2             | 0 | 0 | 2 |   |

Nad = No abnormalities detected      NOS = Not otherwise specified  
Group 1:Vehicle      Group 2:50 mg/kg/day      Group 3:200 mg/kg/day      Group 4:800 mg/kg/day

CONFIDENTIAL

Table 13  
Expanded Incidence Summary for Microscopic Observations  
Test period  
Days 43 Final Sacrifice

Fexinidazole

Study Number: 0505-2007

| CONTROLS FROM GROUP(S): 1               |           | ANIMAL SEX:      | M a l e s |   |   |   | F e m a l e s |   |   |   |
|-----------------------------------------|-----------|------------------|-----------|---|---|---|---------------|---|---|---|
| T I S S U E S W I T H D I A G N O S E S |           | DOSAGE GROUP:    | 1         | 2 | 3 | 4 | 1             | 2 | 3 | 4 |
|                                         |           | NO. IN GROUP:    | 2         | 0 | 0 | 2 | 2             | 0 | 0 | 2 |
| LIVER (Continued)                       | . . . . . | NUMBER EXAMINED: | 2         | 0 | 0 | 2 | 2             | 0 | 0 | 2 |
| HEPATOCELLULAR VACUOLATION              |           | Nad>             | 2         | 0 | 0 | 2 | 2             | 0 | 0 | 2 |
| EXTRAMEDULLARY HEMATOPOIESIS            |           | Nad>             | 0         | 0 | 0 | 2 | 1             | 0 | 0 | 2 |
|                                         |           | Minimal>         | 2         | 0 | 0 | 0 | 1             | 0 | 0 | 0 |
| MANDIBULAR L.N.                         | . . . . . | NUMBER EXAMINED: | 2         | 0 | 0 | 2 | 2             | 0 | 0 | 2 |
| SINUS ERYTHROCYTES/ERYTHROPHAGOCYTOSIS  |           | Nad>             | 1         | 0 | 0 | 2 | 2             | 0 | 0 | 2 |
|                                         |           | Minimal>         | 1         | 0 | 0 | 0 | 0             | 0 | 0 | 0 |
| MESENTERIC L.N.                         | . . . . . | NUMBER EXAMINED: | 2         | 0 | 0 | 2 | 2             | 0 | 0 | 2 |
| SINUS ERYTHROCYTES/ERYTHROPHAGOCYTOSIS  |           | Nad>             | 0         | 0 | 0 | 1 | 0             | 0 | 0 | 0 |
|                                         |           | Minimal>         | 1         | 0 | 0 | 1 | 2             | 0 | 0 | 2 |
|                                         |           | Slight>          | 1         | 0 | 0 | 0 | 0             | 0 | 0 | 0 |
| LUNG                                    | . . . . . | NUMBER EXAMINED: | 2         | 0 | 0 | 2 | 2             | 0 | 0 | 2 |
| ALVEOLAR HEMORRHAGE                     |           | Nad>             | 1         | 0 | 0 | 2 | 1             | 0 | 0 | 2 |
|                                         |           | Minimal>         | 0         | 0 | 0 | 0 | 1             | 0 | 0 | 0 |
|                                         |           | Slight>          | 1         | 0 | 0 | 0 | 0             | 0 | 0 | 0 |
| ACUTE INFLAMMATION                      |           | Nad>             | 2         | 0 | 0 | 2 | 2             | 0 | 0 | 2 |
| CHRONIC INFLAMMATION                    |           | Nad>             | 2         | 0 | 0 | 2 | 1             | 0 | 0 | 2 |
|                                         |           | Minimal>         | 0         | 0 | 0 | 0 | 1             | 0 | 0 | 0 |
| ALVEOLAR MACROPHAGE INFILTRATION        |           | Nad>             | 1         | 0 | 0 | 1 | 0             | 0 | 0 | 1 |
|                                         |           | Minimal>         | 1         | 0 | 0 | 1 | 1             | 0 | 0 | 1 |
|                                         |           | Slight>          | 0         | 0 | 0 | 0 | 1             | 0 | 0 | 0 |

Nad = No abnormalities detected      NOS = Not otherwise specified  
Group 1:Vehicle      Group 2:50 mg/kg/day      Group 3:200 mg/kg/day      Group 4:800 mg/kg/day

CONFIDENTIAL

Table 13  
Expanded Incidence Summary for Microscopic Observations  
Test period  
Days 43 Final Sacrifice

Fexinidazole

Study Number: 0505-2007

| CONTROLS FROM GROUP(S): 1               |           | ANIMAL SEX: M a l e s |   |   |   | F e m a l e s |   |   |   |   |
|-----------------------------------------|-----------|-----------------------|---|---|---|---------------|---|---|---|---|
| T I S S U E S W I T H D I A G N O S E S |           | DOSAGE GROUP:         | 1 | 2 | 3 | 4             | 1 | 2 | 3 | 4 |
|                                         |           | NO. IN GROUP:         | 2 | 0 | 0 | 2             | 2 | 0 | 0 | 2 |
| LUNG (Continued)                        | . . . . . | NUMBER EXAMINED:      | 2 | 0 | 0 | 2             | 2 | 0 | 0 | 2 |
| BRONCHOPNEUMONIA                        |           | Nad>                  | 2 | 0 | 0 | 2             | 2 | 0 | 0 | 2 |
| CAPILLARY ANGIOMATOSIS                  |           | Nad>                  | 1 | 0 | 0 | 2             | 2 | 0 | 0 | 2 |
|                                         |           | Slight>               | 1 | 0 | 0 | 0             | 0 | 0 | 0 | 0 |
| MAMMARY GLAND                           | . . . . . | NUMBER EXAMINED:      | 2 | 0 | 0 | 2             | 2 | 0 | 0 | 2 |
| NO MAMMARY TISSUE IN THE SECTION        |           | Nad>                  | 0 | 0 | 0 | 0             | 2 | 0 | 0 | 2 |
|                                         |           | Present>              | 2 | 0 | 0 | 2             | 0 | 0 | 0 | 0 |
| IMMATURE                                |           | Nad>                  | 2 | 0 | 0 | 2             | 2 | 0 | 0 | 2 |
| EDEMA                                   |           | Nad>                  | 2 | 0 | 0 | 2             | 0 | 0 | 0 | 0 |
|                                         |           | Minimal>              | 0 | 0 | 0 | 0             | 1 | 0 | 0 | 0 |
|                                         |           | Slight>               | 0 | 0 | 0 | 0             | 1 | 0 | 0 | 1 |
|                                         |           | Moderate>             | 0 | 0 | 0 | 0             | 0 | 0 | 0 | 1 |
| STROMAL PROLIFERATION                   |           | Nad>                  | 2 | 0 | 0 | 2             | 0 | 0 | 0 | 0 |
|                                         |           | Minimal>              | 0 | 0 | 0 | 0             | 1 | 0 | 0 | 0 |
|                                         |           | Moderate>             | 0 | 0 | 0 | 0             | 1 | 0 | 0 | 2 |
| DUCTAL-ALVEOLAR HYPERPLASIA             |           | Nad>                  | 2 | 0 | 0 | 2             | 0 | 0 | 0 | 0 |
|                                         |           | Minimal>              | 0 | 0 | 0 | 0             | 1 | 0 | 0 | 0 |
|                                         |           | Moderate>             | 0 | 0 | 0 | 0             | 1 | 0 | 0 | 2 |
| LOBULAR HYPERPLASIA                     |           | Nad>                  | 2 | 0 | 0 | 2             | 2 | 0 | 0 | 2 |
| SECRETORY ACTIVITY                      |           | Nad>                  | 2 | 0 | 0 | 2             | 2 | 0 | 0 | 2 |
| SKELETAL MUSCLE                         | . . . . . | NUMBER EXAMINED:      | 2 | 0 | 0 | 2             | 2 | 0 | 0 | 2 |

Nad = No abnormalities detected      NOS = Not otherwise specified  
Group 1:Vehicle      Group 2:50 mg/kg/day      Group 3:200 mg/kg/day      Group 4:800 mg/kg/day

CONFIDENTIAL

Table 13  
Expanded Incidence Summary for Microscopic Observations  
Test period  
Days 43 Final Sacrifice

Fexinidazole

Study Number: 0505-2007

| CONTROLS FROM GROUP(S): 1               |  | ANIMAL SEX: M a l e s |   |   |   | F e m a l e s |   |   |   |   |
|-----------------------------------------|--|-----------------------|---|---|---|---------------|---|---|---|---|
| T I S S U E S W I T H D I A G N O S E S |  | DOSAGE GROUP:         | 1 | 2 | 3 | 4             | 1 | 2 | 3 | 4 |
|                                         |  | NO. IN GROUP:         | 2 | 0 | 0 | 2             | 2 | 0 | 0 | 2 |
| SKELETAL MUSCLE (Continued)             |  | .NUMBER EXAMINED:     | 2 | 0 | 0 | 2             | 2 | 0 | 0 | 2 |
| CHRONIC INFLAMMATION                    |  | Nad>                  | 2 | 0 | 0 | 2             | 2 | 0 | 0 | 1 |
|                                         |  | Minimal>              | 0 | 0 | 0 | 0             | 0 | 0 | 0 | 1 |
| SCIATIC NERVE                           |  | .NUMBER EXAMINED:     | 2 | 0 | 0 | 2             | 2 | 0 | 0 | 2 |
| OPTIC NERVES                            |  | .NUMBER EXAMINED:     | 2 | 0 | 0 | 2             | 2 | 0 | 0 | 2 |
| OVARIES                                 |  | .NUMBER EXAMINED:     | 0 | 0 | 0 | 0             | 2 | 0 | 0 | 2 |
| IMMATURE                                |  | Nad>                  | 0 | 0 | 0 | 0             | 2 | 0 | 0 | 2 |
| CORPORA LUTEA                           |  | Present>              | 0 | 0 | 0 | 0             | 2 | 0 | 0 | 2 |
| CYSTS                                   |  | Nad>                  | 0 | 0 | 0 | 0             | 2 | 0 | 0 | 1 |
|                                         |  | Slight>               | 0 | 0 | 0 | 0             | 0 | 0 | 0 | 1 |
| PANCREAS                                |  | .NUMBER EXAMINED:     | 2 | 0 | 0 | 2             | 2 | 0 | 0 | 2 |
| ACINAR DEGRANULATION                    |  | Nad>                  | 2 | 0 | 0 | 2             | 2 | 0 | 0 | 2 |
| ACINAR APOPTOSIS                        |  | Nad>                  | 2 | 0 | 0 | 2             | 1 | 0 | 0 | 1 |
|                                         |  | Minimal>              | 0 | 0 | 0 | 0             | 1 | 0 | 0 | 1 |
| PITUITARY                               |  | .NUMBER EXAMINED:     | 2 | 0 | 0 | 2             | 2 | 0 | 0 | 2 |
| CYSTS, PARS DISTALIS                    |  | Nad>                  | 2 | 0 | 0 | 1             | 1 | 0 | 0 | 2 |
|                                         |  | Slight>               | 0 | 0 | 0 | 1             | 1 | 0 | 0 | 0 |
| CRANIOPHARINGEAL CYSTS                  |  | Nad>                  | 2 | 0 | 0 | 2             | 2 | 0 | 0 | 1 |
|                                         |  | Moderate>             | 0 | 0 | 0 | 0             | 0 | 0 | 0 | 1 |
| PROSTATE                                |  | .NUMBER EXAMINED:     | 2 | 0 | 0 | 2             | 0 | 0 | 0 | 0 |

Nad = No abnormalities detected  
Group 1:Vehicle

NOS = Not otherwise specified  
Group 2:50 mg/kg/day

Group 3:200 mg/kg/day

Group 4:800 mg/kg/day



CONFIDENTIAL

Table 13  
Expanded Incidence Summary for Microscopic Observations  
Test period  
Days 43 Final Sacrifice

Fexinidazole

Study Number: 0505-2007

| CONTROLS FROM GROUP(S): 1                      |           | ANIMAL SEX: M a l e s |   |   |   | F e m a l e s |   |   |   |   |
|------------------------------------------------|-----------|-----------------------|---|---|---|---------------|---|---|---|---|
| T I S S U E S W I T H D I A G N O S E S        |           | DOSAGE GROUP:         | 1 | 2 | 3 | 4             | 1 | 2 | 3 | 4 |
|                                                |           | NO. IN GROUP:         | 2 | 0 | 0 | 2             | 2 | 0 | 0 | 2 |
| PROSTATE (Continued)                           | . . . . . | NUMBER EXAMINED:      | 2 | 0 | 0 | 2             | 0 | 0 | 0 | 0 |
| IMMATURE                                       |           | Nad>                  | 1 | 0 | 0 | 1             | 0 | 0 | 0 | 0 |
|                                                |           | Present>              | 1 | 0 | 0 | 1             | 0 | 0 | 0 | 0 |
| PARATHYROIDS                                   | . . . . . | NUMBER EXAMINED:      | 2 | 0 | 0 | 2             | 2 | 0 | 0 | 2 |
| ONLY ONE PARATHYROID AVAILABLE FOR EXAMINATION |           | Nad>                  | 1 | 0 | 0 | 1             | 0 | 0 | 0 | 0 |
|                                                |           | Present>              | 1 | 0 | 0 | 1             | 2 | 0 | 0 | 2 |
| CYSTS                                          |           | Nad>                  | 2 | 0 | 0 | 1             | 2 | 0 | 0 | 2 |
|                                                |           | Minimal>              | 0 | 0 | 0 | 1             | 0 | 0 | 0 | 0 |
| SPINAL CORD-CERV.                              | . . . . . | NUMBER EXAMINED:      | 2 | 0 | 0 | 2             | 2 | 0 | 0 | 2 |
| STAGE OF ESTRUS                                | . . . . . | NUMBER EXAMINED:      | 0 | 0 | 0 | 0             | 2 | 0 | 0 | 2 |
| IMMATURE                                       |           | Nad>                  | 0 | 0 | 0 | 0             | 2 | 0 | 0 | 2 |
| PROESTRUS                                      |           | Nad>                  | 0 | 0 | 0 | 0             | 2 | 0 | 0 | 2 |
| ESTRUS                                         |           | Nad>                  | 0 | 0 | 0 | 0             | 2 | 0 | 0 | 2 |
| METESTRUS                                      |           | Nad>                  | 0 | 0 | 0 | 0             | 2 | 0 | 0 | 2 |
| DIESTRUS                                       |           | Present>              | 0 | 0 | 0 | 0             | 2 | 0 | 0 | 2 |
| ANESTRUS                                       |           | Nad>                  | 0 | 0 | 0 | 0             | 2 | 0 | 0 | 2 |
| MANDIBULAR S.G.                                | . . . . . | NUMBER EXAMINED:      | 2 | 0 | 0 | 2             | 2 | 0 | 0 | 2 |

Nad = No abnormalities detected  
Group 1: Vehicle

NOS = Not otherwise specified  
Group 2: 50 mg/kg/day

Group 3: 200 mg/kg/day

Group 4: 800 mg/kg/day

CONFIDENTIAL

Table 13  
Expanded Incidence Summary for Microscopic Observations  
Test period  
Days 43 Final Sacrifice

Fexinidazole

Study Number: 0505-2007

| CONTROLS FROM GROUP(S): 1               |  | ANIMAL SEX: M a l e s |   |   |   | F e m a l e s |   |   |   |   |
|-----------------------------------------|--|-----------------------|---|---|---|---------------|---|---|---|---|
| T I S S U E S W I T H D I A G N O S E S |  | DOSAGE GROUP:         | 1 | 2 | 3 | 4             | 1 | 2 | 3 | 4 |
|                                         |  | NO. IN GROUP:         | 2 | 0 | 0 | 2             | 2 | 0 | 0 | 2 |
| MANDIBULAR S.G. (Continued)             |  | NUMBER EXAMINED:      | 2 | 0 | 0 | 2             | 2 | 0 | 0 | 2 |
| Lymphocytic Infiltration                |  | Nad>                  | 1 | 0 | 0 | 2             | 1 | 0 | 0 | 1 |
|                                         |  | Minimal>              | 1 | 0 | 0 | 0             | 1 | 0 | 0 | 0 |
|                                         |  | Slight>               | 0 | 0 | 0 | 0             | 0 | 0 | 0 | 1 |
| PAROTIDS                                |  | NUMBER EXAMINED:      | 2 | 0 | 0 | 2             | 2 | 0 | 0 | 2 |
| Lymphocytic Infiltration                |  | Nad>                  | 2 | 0 | 0 | 2             | 2 | 0 | 0 | 2 |
| ACINAR ATROPHY                          |  | Nad>                  | 0 | 0 | 0 | 1             | 1 | 0 | 0 | 1 |
|                                         |  | Minimal>              | 2 | 0 | 0 | 0             | 1 | 0 | 0 | 1 |
|                                         |  | Slight>               | 0 | 0 | 0 | 1             | 0 | 0 | 0 | 0 |
| SKIN                                    |  | NUMBER EXAMINED:      | 2 | 0 | 0 | 2             | 2 | 0 | 0 | 2 |
| Chronic Inflammation                    |  | Nad>                  | 2 | 0 | 0 | 1             | 2 | 0 | 0 | 2 |
|                                         |  | Minimal>              | 0 | 0 | 0 | 1             | 0 | 0 | 0 | 0 |
| SPLEEN                                  |  | NUMBER EXAMINED:      | 2 | 0 | 0 | 2             | 2 | 0 | 0 | 2 |
| Extramedullary Hematopoiesis            |  | Nad>                  | 2 | 0 | 0 | 2             | 1 | 0 | 0 | 1 |
|                                         |  | Minimal>              | 0 | 0 | 0 | 0             | 1 | 0 | 0 | 1 |
| STOMACH                                 |  | NUMBER EXAMINED:      | 2 | 0 | 0 | 2             | 2 | 0 | 0 | 2 |
| Acute Inflammation                      |  | Nad>                  | 2 | 0 | 0 | 2             | 2 | 0 | 0 | 0 |
|                                         |  | Minimal>              | 0 | 0 | 0 | 0             | 0 | 0 | 0 | 2 |
| GASTRITIS                               |  | Nad>                  | 2 | 0 | 0 | 2             | 0 | 0 | 0 | 2 |
|                                         |  | Minimal>              | 0 | 0 | 0 | 0             | 1 | 0 | 0 | 0 |
|                                         |  | Slight>               | 0 | 0 | 0 | 0             | 1 | 0 | 0 | 0 |
| STERNUM                                 |  | NUMBER EXAMINED:      | 2 | 0 | 0 | 2             | 2 | 0 | 0 | 2 |

Nad = No abnormalities detected  
Group 1: Vehicle

NOS = Not otherwise specified  
Group 2: 50 mg/kg/day

Group 3: 200 mg/kg/day

Group 4: 800 mg/kg/day

CONFIDENTIAL

Table 13  
Expanded Incidence Summary for Microscopic Observations  
Test period  
Days 43 Final Sacrifice

Fexinidazole

Study Number: 0505-2007

| CONTROLS FROM GROUP(S): 1               |           | ANIMAL SEX:       | M a l e s |   |   |   | F e m a l e s |   |   |   |
|-----------------------------------------|-----------|-------------------|-----------|---|---|---|---------------|---|---|---|
| T I S S U E S W I T H D I A G N O S E S |           | DOSAGE GROUP:     | 1         | 2 | 3 | 4 | 1             | 2 | 3 | 4 |
|                                         |           | NO. IN GROUP:     | 2         | 0 | 0 | 2 | 2             | 0 | 0 | 2 |
| TESTES                                  | . . . . . | .NUMBER EXAMINED: | 2         | 0 | 0 | 2 | 0             | 0 | 0 | 0 |
| IMMATURE                                |           | Nad>              | 2         | 0 | 0 | 2 | 0             | 0 | 0 | 0 |
| SEGMENTAL HYPOPLASIA                    |           | Nad>              | 2         | 0 | 0 | 2 | 0             | 0 | 0 | 0 |
| THYROIDS                                | . . . . . | .NUMBER EXAMINED: | 2         | 0 | 0 | 2 | 2             | 0 | 0 | 2 |
| CYSTIC FOLLICLES                        |           | Nad>              | 1         | 0 | 0 | 1 | 2             | 0 | 0 | 2 |
|                                         |           | Slight>           | 1         | 0 | 0 | 1 | 0             | 0 | 0 | 0 |
| THYMUS                                  | . . . . . | .NUMBER EXAMINED: | 2         | 0 | 0 | 2 | 2             | 0 | 0 | 2 |
| CYSTS                                   |           | Nad>              | 1         | 0 | 0 | 1 | 2             | 0 | 0 | 1 |
|                                         |           | Minimal>          | 1         | 0 | 0 | 1 | 0             | 0 | 0 | 1 |
| INVOLUTION                              |           | Minimal>          | 0         | 0 | 0 | 0 | 2             | 0 | 0 | 1 |
|                                         |           | Slight>           | 1         | 0 | 0 | 0 | 0             | 0 | 0 | 0 |
|                                         |           | Moderate>         | 1         | 0 | 0 | 0 | 0             | 0 | 0 | 1 |
|                                         |           | Marked>           | 0         | 0 | 0 | 2 | 0             | 0 | 0 | 0 |
| TONGUE                                  | . . . . . | .NUMBER EXAMINED: | 2         | 0 | 0 | 2 | 2             | 0 | 0 | 2 |
| ACUTE INFLAMMATION                      |           | Nad>              | 2         | 0 | 0 | 2 | 2             | 0 | 0 | 2 |
| CHRONIC INFLAMMATION                    |           | Nad>              | 2         | 0 | 0 | 2 | 2             | 0 | 0 | 2 |
| TRACHEA                                 | . . . . . | .NUMBER EXAMINED: | 2         | 0 | 0 | 2 | 2             | 0 | 0 | 2 |
| ACUTE INFLAMMATION                      |           | Nad>              | 2         | 0 | 0 | 2 | 2             | 0 | 0 | 2 |
| URINARY BLADDER                         | . . . . . | .NUMBER EXAMINED: | 2         | 0 | 0 | 2 | 2             | 0 | 0 | 2 |

Nad = No abnormalities detected  
Group 1:Vehicle

NOS = Not otherwise specified  
Group 2:50 mg/kg/day

Group 3:200 mg/kg/day

Group 4:800 mg/kg/day

CONFIDENTIAL

Table 13  
Expanded Incidence Summary for Microscopic Observations  
Test period  
Days 43 Final Sacrifice

Fexinidazole

Study Number: 0505-2007

| CONTROLS FROM GROUP(S): 1                          |  | ANIMAL SEX: M a l e s |   |   |   | F e m a l e s |   |   |   |   |
|----------------------------------------------------|--|-----------------------|---|---|---|---------------|---|---|---|---|
| T I S S U E S W I T H D I A G N O S E S            |  | DOSAGE GROUP:         | 1 | 2 | 3 | 4             | 1 | 2 | 3 | 4 |
|                                                    |  | NO. IN GROUP:         | 2 | 0 | 0 | 2             | 2 | 0 | 0 | 2 |
| URINARY BLADDER (Continued)                        |  | NUMBER EXAMINED:      | 2 | 0 | 0 | 2             | 2 | 0 | 0 | 2 |
| MINERALIZATION IN MUSCULARIS/SUBSEROSA             |  | Nad>                  | 2 | 0 | 0 | 2             | 2 | 0 | 0 | 2 |
| UTERUS                                             |  | NUMBER EXAMINED:      | 0 | 0 | 0 | 0             | 2 | 0 | 0 | 2 |
| IMMATURE                                           |  | Nad>                  | 0 | 0 | 0 | 0             | 2 | 0 | 0 | 2 |
| ENDOMETRIAL GLAND HYPERTROPHY/HYPERPLASIA          |  | Minimal>              | 0 | 0 | 0 | 0             | 0 | 0 | 0 | 2 |
|                                                    |  | Slight>               | 0 | 0 | 0 | 0             | 2 | 0 | 0 | 0 |
| EOSINOPHILIC SECRETORY MATERIAL IN GLANDULAR LUMEN |  | Nad>                  | 0 | 0 | 0 | 0             | 2 | 0 | 0 | 0 |
|                                                    |  | Minimal>              | 0 | 0 | 0 | 0             | 0 | 0 | 0 | 2 |
| VAGINA                                             |  | NUMBER EXAMINED:      | 0 | 0 | 0 | 0             | 2 | 0 | 0 | 2 |

Nad = No abnormalities detected  
Group 1:Vehicle

NOS = Not otherwise specified  
Group 2:50 mg/kg/day

Group 3:200 mg/kg/day

Group 4:800 mg/kg/day

***Table 14 Histological changes in ovaries***

**CONFIDENTIAL**

Table 14  
Histological Changes in Ovaries  
Test period

Fexinidazole

Study No. 0505-2007

| Dates of necropsy                | End of treatment |      | 27-28 february 2008 |      |      |      |      |      |      |      |      |      |
|----------------------------------|------------------|------|---------------------|------|------|------|------|------|------|------|------|------|
|                                  | Recovery         |      | 12 march 2008       |      |      |      |      |      |      |      |      |      |
| <b>END OF TREATMENT - Day 29</b> |                  |      |                     |      |      |      |      |      |      |      |      |      |
| Test group                       | 1                |      |                     | 2    |      |      | 3    |      |      | 4    |      |      |
| Dose (mg/kg/day)                 | 0                | 0    | 0                   | 50   | 50   | 50   | 200  | 200  | 200  | 800  | 800  | 800  |
| Female No.                       | 2560             | 2568 | 2572                | 2562 | 2563 | 2576 | 2561 | 2570 | 2567 | 2564 | 2565 | 2569 |
| IMMATURE                         | P                | P    | P                   | -    | -    | -    | -    | -    | -    | -    | -    | -    |
| CORPORA LUTEA                    | -                | -    | -                   | P    | -    | P    | P    | P    | P    | P    | P    | P    |
| <b>RECOVERY - Day 43</b>         |                  |      |                     |      |      |      |      |      |      |      |      |      |
| Test group                       | 1                |      |                     |      |      |      |      | 4    |      |      |      |      |
| Dose (mg/kg/day)                 | 0                | 0    |                     |      |      |      |      | 800  | 800  |      |      |      |
| Female No.                       | 2575             | 2577 |                     |      |      |      |      | 2571 | 2573 |      |      |      |
| IMMATURE                         | -                | -    |                     |      |      |      |      | -    | -    |      |      |      |
| CORPORA LUTEA                    | P                | P    |                     |      |      |      |      | P    | P    |      |      |      |

| <b>Non gradable findings</b>      |
|-----------------------------------|
| - = finding absent<br>P = present |

***Table 15 Stage of Estrus Evaluation***

CONFIDENTIAL

Table 15  
Stage of Estrus Evaluation  
Test period

Fexinidazole

Study No. 0505-2007

| Dates of necropsy   | End of treatment |         | 27-28 february 2008 |         |         |         |         |         |         |         |         |         |
|---------------------|------------------|---------|---------------------|---------|---------|---------|---------|---------|---------|---------|---------|---------|
|                     | Recovery         |         | 12 march 2008       |         |         |         |         |         |         |         |         |         |
| END OF TREATMENT    |                  |         |                     |         |         |         |         |         |         |         |         |         |
| 27-28 february 2008 |                  |         |                     |         |         |         |         |         |         |         |         |         |
| Test group          | 1                |         |                     | 2       |         |         | 3       |         |         | 4       |         |         |
| Dose (mg/kg/day)    | 0                | 0       | 0                   | 50      | 50      | 50      | 200     | 200     | 200     | 800     | 800     | 800     |
| Female No.          | 2560             | 2568    | 2572                | 2562    | 2563    | 2576    | 2561    | 2570    | 2567    | 2564    | 2565    | 2569    |
| Date of birth       | 03-5-07          | 09-5-07 | 11-5-07             | 05-5-07 | 05-5-07 | 16-5-07 | 05-5-07 | 11-5-07 | 06-5-07 | 05-5-07 | 05-5-07 | 11-5-07 |
| IMMATURE            | P                | P       | P                   | -       | -       | -       | -       | -       | -       | -       | -       | -       |
| PROESTRUS           | -                | -       | -                   | -       | -       | -       | -       | -       | -       | -       | -       | -       |
| ESTRUS              | -                | -       | -                   | -       | P       | -       | -       | -       | -       | -       | -       | -       |
| METESTRUS           | -                | -       | -                   | -       | -       | -       | -       | -       | -       | -       | -       | P       |
| DIESTRUS            | -                | -       | -                   | P       | -       | P       | P       | P       | P       | P       | P       | -       |
| ANESTRUS            | -                | -       | -                   | -       | -       | -       | -       | -       | -       | -       | -       | -       |
| RECOVERY            |                  |         |                     |         |         |         |         |         |         |         |         |         |
| 12 march 2008       |                  |         |                     |         |         |         |         |         |         |         |         |         |
| Test group          | 1                |         |                     |         |         |         |         |         | 4       |         |         |         |
| Dose (mg/kg/day)    | 0                | 0       |                     |         |         |         |         |         | 800     | 800     |         |         |
| Female No.          | 2575             | 2577    |                     |         |         |         |         |         | 2571    | 2573    |         |         |
| Date of birth       | 16-5-07          | 17-5-07 |                     |         |         |         |         |         | 11-5-07 | 13-5-07 |         |         |
| Date of birth       |                  |         |                     |         |         |         |         |         |         |         |         |         |
| IMMATURE            | -                | -       |                     |         |         |         |         |         | -       | -       |         |         |
| PROESTRUS           | -                | -       |                     |         |         |         |         |         | -       | -       |         |         |
| ESTRUS              | -                | -       |                     |         |         |         |         |         | -       | -       |         |         |
| METESTRUS           | -                | -       |                     |         |         |         |         |         | -       | -       |         |         |
| DIESTRUS            | P                | P       |                     |         |         |         |         |         | P       | P       |         |         |
| ANESTRUS            | -                | -       |                     |         |         |         |         |         | -       | -       |         |         |

Length of estrus stages:  
Proestrus + Estrus + Metestrus = 18 days  
Diestrus = 2-3 month  
Anestrus = 3-5 month



## APPENDICES

## ***Appendix 1 QA Statement***

## ***Appendix 2 Clinical Signs***

CONFIDENTIAL

Appendix 2  
Individual Animal Clinical Signs

Fexinidazole

Study Number: 0505-2007

M a l e s

| Animal Number | Dose    | Clinical Signs              | Days Present | Study Day(s) Noted        |
|---------------|---------|-----------------------------|--------------|---------------------------|
| 2516          | Vehicle | NORMAL/NO SIGNIFICANT SIGNS | 36           | Pretest phase -8--2       |
|               |         | DIARRHEA, MODERATE          | 1            | Test period 1-29          |
|               |         | SOFT STOOL, SLIGHT          | 4            | Test period 9             |
|               |         | SOFT STOOL, MODERATE        | 5            | Test period 2,8,22-23     |
|               |         |                             |              | Pretest phase -1          |
| 2518          | Vehicle | NORMAL/NO SIGNIFICANT SIGNS | 34           | Test period 10,13-14,18   |
|               |         | DIARRHEA, SLIGHT            | 1            | Pretest phase -8--6,-3--2 |
|               |         | DIARRHEA, MODERATE          | 2            | Test period 1-29          |
|               |         | DIARRHEA, MARKED            | 2            | Test period 6             |
|               |         | SOFT STOOL, SLIGHT          | 6            | Pretest phase -4,-1       |
|               |         | SOFT STOOL, MODERATE        | 3            | Test period 14-15         |
|               |         | REDUCED FOOD INTAKE, SLIGHT | 1            | Pretest phase -5          |
| 2520          | Vehicle | NORMAL/NO SIGNIFICANT SIGNS | 38           | Test period 2-3,8,12-13   |
|               |         | SOFT STOOL, SLIGHT          | 5            | Test period 7,11,16       |
|               |         | SOFT STOOL, MODERATE        | 3            | Test period 12            |
| 2527          | Vehicle | NORMAL/NO SIGNIFICANT SIGNS | 48           | Pretest phase -8--1       |
|               |         | SOFT STOOL, SLIGHT          | 2            | Test period 1-30          |
|               |         | SOFT STOOL, MODERATE        | 2            | Test period 10-13,16      |
|               |         | REDUCED FOOD INTAKE, SLIGHT | 1            | Test period 3-4,21        |
| 2533          | Vehicle | NORMAL/NO SIGNIFICANT SIGNS | 49           | Pretest phase -8--5,-2--1 |
|               |         | DIARRHEA, SLIGHT            | 1            | Test period 1-36,38-43    |
|               |         | SOFT STOOL, SLIGHT          | 5            | Test period 22,37         |
|               |         |                             | 1            | Pretest phase -4--3       |
|               |         |                             | 1            | Test period 4             |
|               |         |                             | 1            | Pretest phase -8--4,-2--1 |
|               |         |                             | 1            | Test period 1-34,36-43    |
|               |         |                             | 1            | Test period 6             |
|               |         |                             | 5            | Test period 2-3,10,17,28  |

CONFIDENTIAL

Appendix 2  
Individual Animal Clinical Signs

Fexinidazole

Study Number: 0505-2007

M a l e s

| Animal Number | Dose          | Clinical Signs                                                                                                                          | Days Present                 | Study Day(s) Noted                                                                                                                                                                          |
|---------------|---------------|-----------------------------------------------------------------------------------------------------------------------------------------|------------------------------|---------------------------------------------------------------------------------------------------------------------------------------------------------------------------------------------|
| 2533          | Vehicle       | SOFT STOOL, MODERATE                                                                                                                    | 4                            | Pretest phase -3<br>Test period 9,15,35                                                                                                                                                     |
| 2514          | 50 mg/kg/day  | NORMAL/NO SIGNIFICANT SIGNS<br>SOFT STOOL, SLIGHT                                                                                       | 37<br>1                      | Pretest phase -8--1<br>Test period 1-29<br>Test period 12                                                                                                                                   |
| 2521          | 50 mg/kg/day  | NORMAL/NO SIGNIFICANT SIGNS<br>REDUCED FOOD INTAKE, SLIGHT                                                                              | 37<br>6                      | Pretest phase -8--1<br>Test period 1-29<br>Test period 2,4-6,8,10                                                                                                                           |
| 2529          | 50 mg/kg/day  | NORMAL/NO SIGNIFICANT SIGNS<br>DIARRHEA, SLIGHT<br>DIARRHEA, MODERATE<br>DIARRHEA, MARKED<br>SOFT STOOL, SLIGHT<br>SOFT STOOL, MODERATE | 35<br>2<br>2<br>1<br>11<br>3 | Pretest phase -8--4,-2<br>Test period 1-29<br>Test period 22-23<br>Test period 15,30<br>Test period 29<br>Pretest phase -3,-1<br>Test period 2-3,7-8,10,13,16-17,26<br>Test period 11,14,21 |
| 2515          | 200 mg/kg/day | NORMAL/NO SIGNIFICANT SIGNS<br>SOFT STOOL, MODERATE                                                                                     | 36<br>1                      | Pretest phase -8,-6--1<br>Test period 1-29<br>Pretest phase -7                                                                                                                              |
| 2523          | 200 mg/kg/day | NORMAL/NO SIGNIFICANT SIGNS<br>SOFT STOOL, SLIGHT<br>SOFT STOOL, MODERATE                                                               | 36<br>1<br>3                 | Pretest phase -8--4,-2--1<br>Test period 1-29<br>Pretest phase -3<br>Test period 11,14-15                                                                                                   |
| 2526          | 200 mg/kg/day | NORMAL/NO SIGNIFICANT SIGNS<br>SOFT STOOL, MODERATE                                                                                     | 36<br>2                      | Pretest phase -8,-6--2<br>Test period 1-30<br>Pretest phase -7,-1                                                                                                                           |

CONFIDENTIAL

Appendix 2  
Individual Animal Clinical Signs

Fexinidazole

Study Number: 0505-2007

M a l e s

| Animal Number | Dose          | Clinical Signs                | Days Present | Study Day(s) Noted                                     |
|---------------|---------------|-------------------------------|--------------|--------------------------------------------------------|
| 2526          | 200 mg/kg/day | REDUCED FOOD INTAKE, SLIGHT   | 2            | Test period 5,15                                       |
|               |               | REDUCED FOOD INTAKE, MODERATE | 1            | Test period 16                                         |
| 2517          | 800 mg/kg/day | NORMAL/NO SIGNIFICANT SIGNS   | 37           | Pretest phase -8--1                                    |
|               |               | DIARRHEA, SLIGHT              | 1            | Test period 1-29                                       |
|               |               | SOFT STOOL, SLIGHT            | 3            | Test period 22                                         |
|               |               | SOFT STOOL, MODERATE          | 3            | Test period 2-4<br>Test period 7-8,12                  |
| 2519          | 800 mg/kg/day | NORMAL/NO SIGNIFICANT SIGNS   | 35           | Pretest phase -8--6,-3--1                              |
|               |               | SOFT STOOL, SLIGHT            | 3            | Test period 1-29                                       |
|               |               | SOFT STOOL, MODERATE          | 3            | Test period 2,8,22                                     |
|               |               | REDUCED FOOD INTAKE, MODERATE | 1            | Pretest phase -5--4<br>Test period 16<br>Test period 5 |
| 2525          | 800 mg/kg/day | NORMAL/NO SIGNIFICANT SIGNS   | 38           | Pretest phase -8--1                                    |
|               |               | DIARRHEA, MODERATE            | 1            | Test period 1-30                                       |
|               |               | SOFT STOOL, SLIGHT            | 3            | Test period 5<br>Test period 3,8,12                    |
| 2528          | 800 mg/kg/day | NORMAL/NO SIGNIFICANT SIGNS   | 51           | Pretest phase -8--1                                    |
|               |               | DIARRHEA, MODERATE            | 1            | Test period 1-43                                       |
|               |               | SOFT STOOL, SLIGHT            | 3            | Test period 4                                          |
|               |               | SOFT STOOL, MODERATE          | 1            | Test period 5-6,28<br>Test period 13                   |
| 2530          | 800 mg/kg/day | NORMAL/NO SIGNIFICANT SIGNS   | 49           | Pretest phase -8--4,-2--1                              |
|               |               | DIARRHEA, SLIGHT              | 1            | Test period 1-41,43                                    |
|               |               | DIARRHEA, MODERATE            | 2            | Test period 6                                          |
|               |               | SOFT STOOL, SLIGHT            | 2            | Test period 9,42<br>Test period 5,22                   |

CONFIDENTIAL

Appendix 2  
Individual Animal Clinical Signs

Fexinidazole

Study Number: 0505-2007

M a l e s

| <u>Animal<br/>Number</u> | <u>Dose</u>   | <u>Clinical Signs</u> | <u>Days<br/>Present</u> | <u>Study Day(s) Noted</u>          |
|--------------------------|---------------|-----------------------|-------------------------|------------------------------------|
| 2530                     | 800 mg/kg/day | SOFT STOOL, MODERATE  | 2                       | Pretest phase -3<br>Test period 16 |

CONFIDENTIAL

Appendix 2  
Individual Animal Clinical Signs

Fexinidazole

Study Number: 0505-2007

F e m a l e

| Animal Number | Dose         | Clinical Signs              | Days Present | Study Day(s) Noted        |
|---------------|--------------|-----------------------------|--------------|---------------------------|
| 2560          | Vehicle      | NORMAL/NO SIGNIFICANT SIGNS | 35           | Pretest phase -8--6,-4--1 |
|               |              | DIARRHEA, SLIGHT            | 2            | Test period 1-28          |
|               |              | DIARRHEA, MARKED            | 1            | Test period 5,14          |
|               |              | SOFT STOOL, SLIGHT          | 2            | Test period 28            |
|               |              | SOFT STOOL, MODERATE        | 6            | Test period 19,22         |
|               |              |                             |              | Pretest phase -5          |
|               |              |                             |              | Test period 4,11,13,15,29 |
| 2568          | Vehicle      | NORMAL/NO SIGNIFICANT SIGNS | 38           | Pretest phase -8--1       |
|               |              | SOFT STOOL, SLIGHT          | 2            | Test period 1-30          |
|               |              | REDUCED FOOD INTAKE, SLIGHT | 1            | Test period 14,21         |
|               |              |                             |              | Test period 4             |
| 2572          | Vehicle      | NORMAL/NO SIGNIFICANT SIGNS | 38           | Pretest phase -8--1       |
|               |              | DIARRHEA, SLIGHT            | 1            | Test period 1-30          |
|               |              | SOFT STOOL, SLIGHT          | 1            | Test period 5             |
|               |              |                             |              | Test period 11            |
| 2575          | Vehicle      | NORMAL/NO SIGNIFICANT SIGNS | 50           | Pretest phase -8--1       |
|               |              | SOFT STOOL, MODERATE        | 2            | Test period 1-36,38-43    |
|               |              |                             |              | Test period 8,37          |
| 2577          | Vehicle      | NORMAL/NO SIGNIFICANT SIGNS | 50           | Pretest phase -8--1       |
|               |              | DIARRHEA, SLIGHT            | 2            | Test period 1-35,37-43    |
|               |              | DIARRHEA, MODERATE          | 1            | Test period 10,17         |
|               |              | SOFT STOOL, SLIGHT          | 2            | Test period 16            |
|               |              | SOFT STOOL, MODERATE        | 1            | Test period 3,36          |
|               |              |                             |              | Test period 8             |
| 2562          | 50 mg/kg/day | NORMAL/NO SIGNIFICANT SIGNS | 37           | Pretest phase -8--1       |
|               |              | SOFT STOOL, SLIGHT          | 2            | Test period 1-29          |
|               |              |                             |              | Test period 15,21         |



CONFIDENTIAL

Appendix 2  
Individual Animal Clinical Signs

Fexinidazole

Study Number: 0505-2007

F e m a l e

| Animal Number | Dose          | Clinical Signs                          | Days Present | Study Day(s) Noted                                          |
|---------------|---------------|-----------------------------------------|--------------|-------------------------------------------------------------|
| 2563          | 50 mg/kg/day  | NORMAL/NO SIGNIFICANT SIGNS             | 35           | Pretest phase -8--4,-1                                      |
|               |               | SOFT STOOL, SLIGHT                      | 3            | Test period 2-30                                            |
|               |               | SOFT STOOL, MODERATE, 2-4h AFTER DOSING | 1            | Pretest phase -3--2<br>Test period 16<br>Test period 1      |
| 2576          | 50 mg/kg/day  | NORMAL/NO SIGNIFICANT SIGNS             | 38           | Pretest phase -8--1                                         |
|               |               | REDUCED FOOD INTAKE, SLIGHT             | 1            | Test period 1-30<br>Test period 4                           |
| 2561          | 200 mg/kg/day | NORMAL/NO SIGNIFICANT SIGNS             | 36           | Pretest phase -8--5,-3--1                                   |
|               |               | SOFT STOOL, SLIGHT                      | 1            | Test period 1-29                                            |
|               |               | REDUCED FOOD INTAKE, SLIGHT             | 1            | Pretest phase -4<br>Test period 28                          |
| 2570          | 200 mg/kg/day | NORMAL/NO SIGNIFICANT SIGNS             | 38           | Pretest phase -8--1                                         |
|               |               | DIARRHEA, SLIGHT                        | 4            | Test period 1-30                                            |
|               |               | SOFT STOOL, SLIGHT                      | 2            | Test period 5,12,25-26                                      |
|               |               | SOFT STOOL, MODERATE                    | 3            | Test period 14,21<br>Test period 8,15,23                    |
| 2567          | 200 mg/kg/day | NORMAL/NO SIGNIFICANT SIGNS             | 34           | Pretest phase -8--5,-3                                      |
|               |               | SOFT STOOL, SLIGHT                      | 5            | Test period 1-25,27-30                                      |
|               |               | SOFT STOOL, MODERATE                    | 3            | Pretest phase -4,-2--1                                      |
|               |               | REDUCED FOOD INTAKE, SLIGHT             | 3            | Test period 14-15                                           |
|               |               | REDUCED FOOD INTAKE, MODERATE           | 1            | Test period 6,25-26<br>Test period 4,8,20<br>Test period 16 |
| 2564          | 800 mg/kg/day | NORMAL/NO SIGNIFICANT SIGNS             | 37           | Pretest phase -8--1                                         |
|               |               | SOFT STOOL, SLIGHT                      | 1            | Test period 1-29<br>Test period 16                          |

CONFIDENTIAL

Appendix 2  
Individual Animal Clinical Signs

Fexinidazole

Study Number: 0505-2007

F e m a l e

| Animal Number                 | Dose          | Clinical Signs                   | Days Present | Study Day(s) Noted                |
|-------------------------------|---------------|----------------------------------|--------------|-----------------------------------|
| 2564                          | 800 mg/kg/day | REDUCED FOOD INTAKE, SLIGHT      | 2            | Test period 8,19                  |
|                               |               | REDUCED FOOD INTAKE, MODERATE    | 9            | Test period 2-4,6-7,11,14-15,18   |
|                               |               | REDUCED FOOD INTAKE, MARKED      | 1            | Test period 5                     |
| 2565                          | 800 mg/kg/day | NORMAL/NO SIGNIFICANT SIGNS      | 37           | Pretest phase -8--2               |
|                               |               | DIARRHEA, MARKED                 | 1            | Test period 1-30                  |
|                               |               | SOFT STOOL, SLIGHT               | 1            | Test period 28                    |
|                               |               | REDUCED FOOD INTAKE, SLIGHT      | 7            | Pretest phase -1                  |
|                               |               | REDUCED FOOD INTAKE, MODERATE    | 8            | Test period 8,13-16,19-20         |
| 2569                          | 800 mg/kg/day | NORMAL/NO SIGNIFICANT SIGNS      | 38           | Test period 2-7,11,18             |
|                               |               | REDUCED FOOD INTAKE, SLIGHT      | 2            | Pretest phase -8--1               |
|                               |               |                                  |              | Test period 1-30                  |
| 2571                          | 800 mg/kg/day | NORMAL/NO SIGNIFICANT SIGNS      | 50           | Test period 22,28                 |
|                               |               | SOFT STOOL, SLIGHT               | 2            | Pretest phase -8--1               |
|                               |               | REDUCED FOOD INTAKE, SLIGHT      | 8            | Test period 1-30,32-43            |
|                               |               | REDUCED FOOD INTAKE, MODERATE    | 6            | Test period 21,31                 |
|                               |               | REDUCED FOOD INTAKE, MARKED      | 1            | Test period 2,8,10-11,14-15,19,23 |
| 2573                          | 800 mg/kg/day | NORMAL/NO SIGNIFICANT SIGNS      | 47           | Test period 3-5,7,18,28           |
|                               |               | DIARRHEA, SLIGHT                 | 1            | Test period 6                     |
|                               |               | EMESIS OF FOOD, MODERATE         | 1            | Pretest phase -8--5,-3--1         |
|                               |               | SOFT STOOL, MODERATE             | 2            | Test period 1-28,32-43            |
|                               |               | REDUCED FOOD INTAKE, SLIGHT      | 16           | Test period 29                    |
|                               |               |                                  |              | Test period 18                    |
|                               |               |                                  |              | Test period 30-31                 |
| REDUCED FOOD INTAKE, MODERATE | 5             | Pretest phase -4                 |              |                                   |
|                               |               | Test period 3,6,9-10,13-17,19,22 |              |                                   |
|                               |               | Test period 23,25-26,28          |              |                                   |
|                               |               | Test period 2,4-5,8,11           |              |                                   |

### ***Appendix 3 Body Weights***

CONFIDENTIAL

Appendix 3  
Body Weights (kg)

Fexinidazole

Study Number: 0505-2007

| Dose Level    | Animal Number | Group/Subgroup | Study Day | M a l e s |       |       |       |       |       |       | -8" | 1#    | 8 | 14 | 22 | 28 | 35 | 40 |
|---------------|---------------|----------------|-----------|-----------|-------|-------|-------|-------|-------|-------|-----|-------|---|----|----|----|----|----|
|               |               |                |           |           |       |       |       |       |       |       |     |       |   |    |    |    |    |    |
| Vehicle       |               |                |           |           |       |       |       |       |       |       |     |       |   |    |    |    |    |    |
|               | 2516          | 1/1            |           | 8.19      | 8.45  | 8.36  | 8.48  | 8.63  | 8.30  | Dead  |     |       |   |    |    |    |    |    |
|               | 2518          | 1/1            |           | 8.90      | 9.04  | 8.74  | 8.87  | 8.94  | 8.59  | Dead  |     |       |   |    |    |    |    |    |
|               | 2520          | 1/1            |           | 7.94      | 8.08  | 8.01  | 8.11  | 8.29  | 8.11  | Dead  |     |       |   |    |    |    |    |    |
|               | 2527          | 1/1            |           | 7.72      | 7.90  | 7.77  | 7.82  | 7.90  | 8.02  | 7.75  |     | 7.82  |   |    |    |    |    |    |
|               | 2533          | 1/1            |           | 8.26      | 8.34  | 7.79  | 7.98  | 7.84  | 7.48  | 7.41  |     | 7.60  |   |    |    |    |    |    |
|               |               | N              |           | 5         | 5     | 5     | 5     | 5     | 5     | 2     |     | 2     |   |    |    |    |    |    |
|               |               | Mean           |           | 8.20      | 8.36  | 8.14  | 8.25  | 8.32  | 8.10  | 7.58  |     | 7.71  |   |    |    |    |    |    |
|               |               | Sdev           |           | 0.444     | 0.436 | 0.410 | 0.423 | 0.472 | 0.411 | 0.240 |     | 0.153 |   |    |    |    |    |    |
| 50 mg/kg/day  |               |                |           |           |       |       |       |       |       |       |     |       |   |    |    |    |    |    |
|               | 2514          | 2/1            |           | 9.61      | 9.78  | 9.54  | 9.68  | 9.92  | 9.43  | Dead  |     |       |   |    |    |    |    |    |
|               | 2521          | 2/1            |           | 8.03      | 8.08  | 7.67  | 7.85  | 7.80  | 7.50  | Dead  |     |       |   |    |    |    |    |    |
|               | 2529          | 2/1            |           | 7.35      | 7.56  | 7.40  | 7.54  | 7.65  | 7.63  | Dead  |     |       |   |    |    |    |    |    |
|               |               | N              |           | 3         | 3     | 3     | 3     | 3     | 3     | 0     |     | 0     |   |    |    |    |    |    |
|               |               | Mean           |           | 8.33      | 8.47  | 8.20  | 8.36  | 8.46  | 8.19  | -     |     | -     |   |    |    |    |    |    |
|               |               | Sdev           |           | 1.160     | 1.163 | 1.165 | 1.155 | 1.271 | 1.081 | -     |     | -     |   |    |    |    |    |    |
| 200 mg/kg/day |               |                |           |           |       |       |       |       |       |       |     |       |   |    |    |    |    |    |
|               | 2515          | 3/1            |           | 8.93      | 8.87  | 8.76  | 8.84  | 8.73  | 8.33  | Dead  |     |       |   |    |    |    |    |    |
|               | 2523          | 3/1            |           | 8.66      | 8.70  | 8.32  | 8.41  | 8.32  | 7.79  | Dead  |     |       |   |    |    |    |    |    |
|               | 2526          | 3/1            |           | 7.62      | 7.96  | 7.49  | 7.88  | 7.67  | 7.67  | Dead  |     |       |   |    |    |    |    |    |
|               |               | N              |           | 3         | 3     | 3     | 3     | 3     | 3     | 0     |     | 0     |   |    |    |    |    |    |
|               |               | Mean           |           | 8.40      | 8.51  | 8.19  | 8.37  | 8.24  | 7.93  | -     |     | -     |   |    |    |    |    |    |
|               |               | Sdev           |           | 0.691     | 0.482 | 0.642 | 0.479 | 0.531 | 0.351 | -     |     | -     |   |    |    |    |    |    |
| 800 mg/kg/day |               |                |           |           |       |       |       |       |       |       |     |       |   |    |    |    |    |    |
|               | 2517          | 4/1            |           | 8.00      | 7.85  | 7.36  | 7.31  | 7.12  | 6.76  | Dead  |     |       |   |    |    |    |    |    |
|               | 2519          | 4/1            |           | 8.18      | 8.27  | 7.81  | 7.97  | 8.01  | 8.07  | Dead  |     |       |   |    |    |    |    |    |
|               | 2525          | 4/1            |           | 9.40      | 9.87  | 9.48  | 9.70  | 9.44  | 9.25  | Dead  |     |       |   |    |    |    |    |    |
|               | 2528          | 4/1            |           | 8.84      | 9.11  | 8.62  | 8.70  | 8.62  | 8.65  | 8.35  |     | 8.49  |   |    |    |    |    |    |
|               | 2530          | 4/1            |           | 7.53      | 7.54  | 7.03  | 7.18  | 7.08  | 6.77  | 6.75  |     | 7.02  |   |    |    |    |    |    |
|               |               | N              |           | 5         | 5     | 5     | 5     | 5     | 5     | 2     |     | 2     |   |    |    |    |    |    |
|               |               | Mean           |           | 8.39      | 8.53  | 8.06  | 8.17  | 8.05  | 7.90  | 7.55  |     | 7.75  |   |    |    |    |    |    |
|               |               | Sdev           |           | 0.734     | 0.954 | 0.993 | 1.049 | 1.010 | 1.117 | 1.131 |     | 1.039 |   |    |    |    |    |    |

Note: " = Pretest phase; # = Test period

CONFIDENTIAL

Appendix 3  
Body Weights (kg)

Fexinidazole

Study Number: 0505-2007

| Dose Level    | Animal Number | Group/Subgroup | Study Day | F e m a l e s |       |       |       |       |       |       |       |  |
|---------------|---------------|----------------|-----------|---------------|-------|-------|-------|-------|-------|-------|-------|--|
|               |               |                |           | -8"           | 1#    | 8     | 14    | 22    | 28    | 35    | 40    |  |
| Vehicle       |               |                |           |               |       |       |       |       |       |       |       |  |
|               | 2560          | 1/1            |           | 6.85          | 6.83  | 6.72  | 6.46  | 6.50  | 6.27  | Dead  |       |  |
|               | 2568          | 1/1            |           | 7.22          | 7.38  | 7.11  | 6.98  | 7.09  | 6.92  | Dead  |       |  |
|               | 2572          | 1/1            |           | 7.07          | 7.23  | 6.76  | 6.75  | 6.70  | 6.44  | Dead  |       |  |
|               | 2575          | 1/1            |           | 7.82          | 7.76  | 7.75  | 7.64  | 7.79  | 7.84  | 7.74  | 7.91  |  |
|               | 2577          | 1/1            |           | 7.92          | 8.39  | 8.12  | 8.29  | 8.38  | 8.70  | 8.37  | 8.51  |  |
|               |               | N              |           | 5             | 5     | 5     | 5     | 5     | 5     | 2     | 2     |  |
|               |               | Mean           |           | 7.37          | 7.52  | 7.29  | 7.22  | 7.29  | 7.23  | 8.06  | 8.21  |  |
|               |               | Sdev           |           | 0.471         | 0.592 | 0.621 | 0.737 | 0.783 | 1.020 | 0.445 | 0.426 |  |
| 50 mg/kg/day  |               |                |           |               |       |       |       |       |       |       |       |  |
|               | 2562          | 2/1            |           | 6.96          | 6.91  | 6.96  | 6.84  | 7.00  | 6.65  | Dead  |       |  |
|               | 2563          | 2/1            |           | 7.55          | 7.56  | 7.53  | 7.53  | 7.82  | 7.56  | Dead  |       |  |
|               | 2576          | 2/1            |           | 8.30          | 8.64  | 8.47  | 8.53  | 8.57  | 8.26  | Dead  |       |  |
|               |               | N              |           | 3             | 3     | 3     | 3     | 3     | 3     | 0     | 0     |  |
|               |               | Mean           |           | 7.60          | 7.70  | 7.65  | 7.63  | 7.80  | 7.49  | -     | -     |  |
|               |               | Sdev           |           | 0.674         | 0.872 | 0.762 | 0.847 | 0.784 | 0.803 | -     | -     |  |
| 200 mg/kg/day |               |                |           |               |       |       |       |       |       |       |       |  |
|               | 2561          | 3/1            |           | 7.32          | 7.41  | 7.31  | 7.23  | 7.53  | 7.03  | Dead  |       |  |
|               | 2570          | 3/1            |           | 6.90          | 6.95  | 6.77  | 6.76  | 6.75  | 6.38  | Dead  |       |  |
|               | 2567          | 3/1            |           | 8.73          | 8.52  | 8.36  | 8.43  | 8.29  | 7.99  | Dead  |       |  |
|               |               | N              |           | 3             | 3     | 3     | 3     | 3     | 3     | 0     | 0     |  |
|               |               | Mean           |           | 7.65          | 7.63  | 7.48  | 7.48  | 7.52  | 7.13  | -     | -     |  |
|               |               | Sdev           |           | 0.960         | 0.807 | 0.808 | 0.862 | 0.770 | 0.809 | -     | -     |  |
| 800 mg/kg/day |               |                |           |               |       |       |       |       |       |       |       |  |
|               | 2564          | 4/1            |           | 7.53          | 7.57  | 6.96  | 6.58  | 6.51  | 6.43  | Dead  |       |  |
|               | 2565          | 4/1            |           | 7.17          | 6.83  | 6.15  | 6.53  | 6.39  | 6.01  | Dead  |       |  |
|               | 2569          | 4/1            |           | 7.87          | 7.96  | 7.81  | 8.01  | 7.96  | 7.70  | Dead  |       |  |
|               | 2571          | 4/1            |           | 7.66          | 7.86  | 7.13  | 7.27  | 7.21  | 6.84  | 7.23  | 7.37  |  |
|               | 2573          | 4/1            |           | 6.90          | 6.85  | 6.31  | 6.43  | 6.45  | 6.27  | 6.38  | 6.54  |  |
|               |               | N              |           | 5             | 5     | 5     | 5     | 5     | 5     | 2     | 2     |  |
|               |               | Mean           |           | 7.42          | 7.41  | 6.87  | 6.96  | 6.90  | 6.65  | 6.81  | 6.95  |  |
|               |               | Sdev           |           | 0.391         | 0.546 | 0.670 | 0.671 | 0.677 | 0.659 | 0.601 | 0.592 |  |

Note: " = Pretest phase; # = Test period

## ***Appendix 4 ECG Examinations***

CONFIDENTIAL

Appendix 4  
Individual Animal ECG Rhythm and Morphology Findings

Fexinidazole

Study Number: 0505-2007

M a l e s

| Animal Number | Dose         | Clinical Signs                                                | Study Day(s) Noted                                   |
|---------------|--------------|---------------------------------------------------------------|------------------------------------------------------|
| 2516          | Vehicle      | Respiratory Sinus Arrhythmia                                  | Pretest phase -5<br>Test period 24                   |
| 2518          | Vehicle      | Respiratory Sinus Arrhythmia                                  | Pretest phase -5<br>Test period 24                   |
| 2520          | Vehicle      | Respiratory Sinus Arrhythmia                                  | Pretest phase -5<br>Test period 24                   |
| 2527          | Vehicle      | Respiratory Sinus Arrhythmia                                  | Pretest phase -5<br>Test period 24,38                |
| 2533          | Vehicle      | No ECG abnormalities detected<br>Respiratory Sinus Arrhythmia | Pretest phase -5<br>Test period 24<br>Test period 38 |
| 2514          | 50mg/kg/day  | No ECG abnormalities detected<br>Respiratory Sinus Arrhythmia | Test period 24<br>Pretest phase -5                   |
| 2521          | 50mg/kg/day  | No ECG abnormalities detected<br>Respiratory Sinus Arrhythmia | Test period 24<br>Pretest phase -5                   |
| 2529          | 50mg/kg/day  | No ECG abnormalities detected<br>Respiratory Sinus Arrhythmia | Test period 24<br>Pretest phase -5                   |
| 2515          | 200mg/kg/day | Respiratory Sinus Arrhythmia                                  | Pretest phase -5<br>Test period 24                   |
| 2523          | 200mg/kg/day | Respiratory Sinus Arrhythmia                                  | Pretest phase -5<br>Test period 24                   |
| 2526          | 200mg/kg/day | No ECG abnormalities detected                                 | Test period 24                                       |

CONFIDENTIAL

Appendix 4  
Individual Animal ECG Rhythm and Morphology Findings

Fexinidazole

Study Number: 0505-2007

M a l e s

| Animal Number | Dose         | Clinical Signs                                                | Study Day(s) Noted                                   |
|---------------|--------------|---------------------------------------------------------------|------------------------------------------------------|
| 2526          | 200mg/kg/day | Respiratory Sinus Arrhythmia                                  | Pretest phase -5                                     |
| 2517          | 800mg/kg/day | No ECG abnormalities detected<br>Respiratory Sinus Arrhythmia | Pretest phase -5<br>Test period 24                   |
| 2519          | 800mg/kg/day | Respiratory Sinus Arrhythmia                                  | Pretest phase -5<br>Test period 24                   |
| 2525          | 800mg/kg/day | Respiratory Sinus Arrhythmia                                  | Pretest phase -5<br>Test period 24                   |
| 2528          | 800mg/kg/day | No ECG abnormalities detected                                 | Pretest phase -5<br>Test period 24,38                |
| 2530          | 800mg/kg/day | No ECG abnormalities detected<br>Respiratory Sinus Arrhythmia | Test period 24<br>Pretest phase -5<br>Test period 38 |



CONFIDENTIAL

Appendix 4  
Individual Animal ECG Rhythm and Morphology Findings

Fexinidazole

Study Number: 0505-2007

F e m a l e

| Animal Number | Dose         | Clinical Signs                                                | Study Day(s) Noted                                   |
|---------------|--------------|---------------------------------------------------------------|------------------------------------------------------|
| 2560          | Vehicle      | Respiratory Sinus Arrhythmia                                  | Pretest phase -6<br>Test period 24                   |
| 2568          | Vehicle      | Respiratory Sinus Arrhythmia                                  | Pretest phase -6<br>Test period 24                   |
| 2572          | Vehicle      | No ECG abnormalities detected<br>Respiratory Sinus Arrhythmia | Pretest phase -6<br>Test period 24                   |
| 2575          | Vehicle      | No ECG abnormalities detected                                 | Pretest phase -6<br>Test period 24,37                |
| 2577          | Vehicle      | No ECG abnormalities detected<br>Respiratory Sinus Arrhythmia | Test period 37<br>Pretest phase -6<br>Test period 24 |
| 2562          | 50mg/kg/day  | No ECG abnormalities detected<br>Respiratory Sinus Arrhythmia | Pretest phase -6<br>Test period 24                   |
| 2563          | 50mg/kg/day  | No ECG abnormalities detected<br>Respiratory Sinus Arrhythmia | Test period 24<br>Pretest phase -6                   |
| 2576          | 50mg/kg/day  | No ECG abnormalities detected                                 | Pretest phase -6<br>Test period 24                   |
| 2561          | 200mg/kg/day | Respiratory Sinus Arrhythmia                                  | Pretest phase -6<br>Test period 24                   |
| 2570          | 200mg/kg/day | Respiratory Sinus Arrhythmia                                  | Pretest phase -6<br>Test period 24                   |
| 2567          | 200mg/kg/day | Respiratory Sinus Arrhythmia                                  | Pretest phase -6                                     |

CONFIDENTIAL

Appendix 4  
Individual Animal ECG Rhythm and Morphology Findings

Fexinidazole

Study Number: 0505-2007

F e m a l e

| Animal Number | Dose         | Clinical Signs                | Study Day(s) Noted                    |
|---------------|--------------|-------------------------------|---------------------------------------|
| 2567          | 200mg/kg/day | Respiratory Sinus Arrhythmia  | Test period 24                        |
| 2564          | 800mg/kg/day | Respiratory Sinus Arrhythmia  | Pretest phase -6<br>Test period 24    |
| 2565          | 800mg/kg/day | No ECG abnormalities detected | Pretest phase -6<br>Test period 24    |
| 2569          | 800mg/kg/day | No ECG abnormalities detected | Pretest phase -6<br>Test period 24    |
| 2571          | 800mg/kg/day | No ECG abnormalities detected | Pretest phase -6<br>Test period 24,37 |
| 2573          | 800mg/kg/day | Respiratory Sinus Arrhythmia  | Pretest phase -6<br>Test period 24,37 |

CONFIDENTIAL  
Appendix 4  
ECG Examinations Data

Fexinidazole

Study Number: 0505-2007

| M a l e s  |     | Animal No. | -5"  | 24#   | 38    |
|------------|-----|------------|------|-------|-------|
| Dosage     |     | Day:       | S 1  | S 1   | S 1   |
| mg/kg : 0. |     | Session:   |      |       |       |
| HR         | bpm | 2516       | 97.  | 89.   |       |
|            |     | 2518       | 94.  | 103.  |       |
|            |     | 2520       | 87.  | 80.   |       |
|            |     | 2527       | 101. | 125.  | 94.   |
|            |     | 2533       | 87.  | 79.   | 72.   |
|            |     | Mean       | 93.  | 95.   | 83.   |
|            |     | SD         | 6.2  | 19.2  | 15.6  |
|            | N   | 5          | 5    | 2     |       |
| RR         | ms  | 2516       | 613. | 673.  |       |
|            |     | 2518       | 634. | 579.  |       |
|            |     | 2520       | 688. | 749.  |       |
|            |     | 2527       | 594. | 478.  | 636.  |
|            |     | 2533       | 683. | 751.  | 831.  |
|            |     | Mean       | 642. | 646.  | 734.  |
|            |     | SD         | 41.8 | 117.3 | 137.9 |
|            | N   | 5          | 5    | 2     |       |
| Pdur       | ms  | 2516       | 39.  | 33.   |       |
|            |     | 2518       | 37.  | 33.   |       |
|            |     | 2520       | 37.  | 38.   |       |
|            |     | 2527       | 37.  | 31.   | 35.   |
|            |     | 2533       | 41.  | 38.   | 42.   |
|            |     | Mean       | 38.  | 35.   | 39.   |
|            |     | SD         | 1.8  | 3.2   | 4.9   |
|            | N   | 5          | 5    | 2     |       |
| PR         | ms  | 2516       | 83.  | 84.   |       |
|            |     | 2518       | 88.  | 85.   |       |
|            |     | 2520       | 87.  | 74.   |       |
|            |     | 2527       | 81.  | 72.   | 80.   |
|            |     | 2533       | 96.  | 91.   | 93.   |
|            |     | Mean       | 87.  | 81.   | 87.   |
|            |     | SD         | 5.8  | 8.0   | 9.2   |
|            | N   | 5          | 5    | 2     |       |

Note: " = Pretest phase; # = Test period

CONFIDENTIAL  
Appendix 4  
ECG Examinations Data

Fexinidazole

Study Number: 0505-2007

| M a l e s |        | Animal No. | Day: | 24#  | 38   |
|-----------|--------|------------|------|------|------|
| Dosage    |        | mg/kg :    | 0.   | S 1  | S 1  |
| QRS       | ms     | 2516       | 68.  | 56.  |      |
|           |        | 2518       | 43.  | 40.  |      |
|           |        | 2520       | 42.  | 47.  |      |
|           |        | 2527       | 43.  | 45.  | 48.  |
|           |        | 2533       | 40.  | 45.  | 53.  |
|           |        | Mean       | 47.  | 47.  | 51.  |
|           |        | SD         | 11.7 | 5.9  | 3.5  |
|           |        | N          | 5    | 5    | 2    |
| QT        | ms     | 2516       | 180. | 197. |      |
|           |        | 2518       | 178. | 179. |      |
|           |        | 2520       | 177. | 196. |      |
|           |        | 2527       | 181. | 177. | 204. |
|           |        | 2533       | 181. | 195. | 194. |
|           |        | Mean       | 179. | 189. | 199. |
|           |        | SD         | 1.8  | 9.9  | 7.1  |
|           |        | N          | 5    | 5    | 2    |
| QTcF      | ms     | 2516       | 212. | 225. |      |
|           |        | 2518       | 207. | 214. |      |
|           |        | 2520       | 200. | 216. |      |
|           |        | 2527       | 215. | 226. | 237. |
|           |        | 2533       | 205. | 214. | 206. |
|           |        | Mean       | 208. | 219. | 222. |
|           |        | SD         | 5.7  | 5.7  | 21.7 |
|           |        | N          | 5    | 5    | 2    |
| MEA       | degree | 2516       | 34.  | 39.  |      |
|           |        | 2518       | -21. | 1.   |      |
|           |        | 2520       | 26.  | 54.  |      |
|           |        | 2527       | 44.  | 44.  | 57.  |
|           |        | 2533       | 143. | 120. | -19. |
|           |        | Mean       | 45.  | 52.  | 19.  |
|           |        | SD         | 60.1 | 43.2 | 53.7 |
|           |        | N          | 5    | 5    | 2    |

Note: " = Pretest phase; # = Test period

CONFIDENTIAL  
Appendix 4  
ECG Examinations Data

Fexinidazole

Study Number: 0505-2007

| M a l e s |      | Animal No. |       |       |       |
|-----------|------|------------|-------|-------|-------|
| Dosage    |      | Day:       | -5"   | 24#   | 38    |
| mg/kg     | : 0. | Session:   | S 1   | S 1   | S 1   |
| Pamp      | mV   | 2516       | 0.32  | 0.38  |       |
|           |      | 2518       | 0.32  | 0.40  |       |
|           |      | 2520       | 0.22  | 0.37  |       |
|           |      | 2527       | 0.24  | 0.25  | 0.26  |
|           |      | 2533       | 0.40  | 0.34  | 0.34  |
|           |      | Mean       | 0.30  | 0.35  | 0.30  |
|           |      | SD         | 0.072 | 0.059 | 0.057 |
|           | N    | 5          | 5     | 2     |       |
| Qamp      | mV   | 2516       | -0.15 | -0.20 |       |
|           |      | 2518       | -0.54 | -0.46 |       |
|           |      | 2520       | -0.53 | -0.41 |       |
|           |      | 2527       | -0.33 | -0.28 | -0.36 |
|           |      | 2533       | -0.28 | -0.25 | -0.16 |
|           |      | Mean       | -0.37 | -0.32 | -0.26 |
|           |      | SD         | 0.168 | 0.110 | 0.141 |
|           | N    | 5          | 5     | 2     |       |
| Ramp      | mV   | 2516       | 2.68  | 3.13  |       |
|           |      | 2518       | 1.37  | 1.38  |       |
|           |      | 2520       | 2.46  | 2.73  |       |
|           |      | 2527       | 2.22  | 2.06  | 2.31  |
|           |      | 2533       | 0.67  | 0.96  | 0.90  |
|           |      | Mean       | 1.88  | 2.05  | 1.61  |
|           |      | SD         | 0.839 | 0.904 | 0.997 |
|           | N    | 5          | 5     | 2     |       |
| Samp      | mV   | 2516       | -0.11 | -0.06 |       |
|           |      | 2518       | -0.26 | -0.13 |       |
|           |      | 2520       | -0.07 | -0.09 |       |
|           |      | 2527       | -0.21 | -0.20 | -0.26 |
|           |      | 2533       | -0.30 | -0.32 | -0.33 |
|           |      | Mean       | -0.19 | -0.16 | -0.30 |
|           |      | SD         | 0.098 | 0.104 | 0.049 |
|           | N    | 5          | 5     | 2     |       |

Note: " = Pretest phase; # = Test period

CONFIDENTIAL  
Appendix 4  
ECG Examinations Data

Fexinidazole

Study Number: 0505-2007

| M a l e s |      | Animal No. |       |       |       |
|-----------|------|------------|-------|-------|-------|
| Dosage    |      | Day:       | -5"   | 24#   | 38    |
| mg/kg     | : 0. | Session:   | S 1   | S 1   | S 1   |
| STd       | mV   | 2516       | -0.10 | -0.08 |       |
|           |      | 2518       | -0.07 | -0.01 |       |
|           |      | 2520       | -0.04 | -0.04 |       |
|           |      | 2527       | -0.15 | -0.07 | -0.07 |
|           |      | 2533       | 0.00  | -0.04 | 0.02  |
|           |      | Mean       | -0.07 | -0.05 | -0.03 |
|           |      | SD         | 0.057 | 0.028 | 0.064 |
|           |      | N          | 5     | 5     | 2     |
| Tamp      | mV   | 2516       | -0.16 | -0.15 |       |
|           |      | 2518       | 0.68  | 0.62  |       |
|           |      | 2520       | -0.07 | 0.24  |       |
|           |      | 2527       | 0.27  | 0.44  | 0.12  |
|           |      | 2533       | 0.28  | 0.28  | 0.32  |
|           |      | Mean       | 0.20  | 0.29  | 0.22  |
|           |      | SD         | 0.333 | 0.286 | 0.141 |
|           |      | N          | 5     | 5     | 2     |

Note: " = Pretest phase; # = Test period

CONFIDENTIAL  
Appendix 4  
ECG Examinations Data

Fexinidazole

Study Number: 0505-2007

| F e m a l e s |      | Animal No. |       |       |       |
|---------------|------|------------|-------|-------|-------|
| Dosage        |      | Day:       | -5"   | 24#   | 38    |
| mg/kg         | : 0. | Session:   | S 1   | S 1   | S 1   |
| HR            | bpm  | 2560       | 63.   | 70.   |       |
|               |      | 2568       | 94.   | 123.  |       |
|               |      | 2572       | 116.  | 106.  |       |
|               |      | 2575       | 87.   | 88.   | 76.   |
|               |      | 2577       | 113.  | 106.  | 126.  |
|               |      | Mean       | 95.   | 99.   | 101.  |
|               |      | SD         | 21.5  | 20.2  | 35.4  |
|               |      | N          | 5     | 5     | 2     |
| RR            | ms   | 2560       | 952.  | 853.  |       |
|               |      | 2568       | 634.  | 484.  |       |
|               |      | 2572       | 515.  | 565.  |       |
|               |      | 2575       | 688.  | 679.  | 784.  |
|               |      | 2577       | 530.  | 563.  | 473.  |
|               |      | Mean       | 664.  | 629.  | 629.  |
|               |      | SD         | 176.5 | 143.3 | 219.9 |
|               |      | N          | 5     | 5     | 2     |
| Pdur          | ms   | 2560       | 47.   | 47.   |       |
|               |      | 2568       | 41.   | 39.   |       |
|               |      | 2572       | 40.   | 44.   |       |
|               |      | 2575       | 38.   | 41.   | 44.   |
|               |      | 2577       | 40.   | 39.   | 37.   |
|               |      | Mean       | 41.   | 42.   | 41.   |
|               |      | SD         | 3.4   | 3.5   | 4.9   |
|               |      | N          | 5     | 5     | 2     |
| PR            | ms   | 2560       | 79.   | 79.   |       |
|               |      | 2568       | 75.   | 77.   |       |
|               |      | 2572       | 87.   | 82.   |       |
|               |      | 2575       | 108.  | 94.   | 116.  |
|               |      | 2577       | 89.   | 83.   | 88.   |
|               |      | Mean       | 88.   | 83.   | 102.  |
|               |      | SD         | 12.8  | 6.6   | 19.8  |
|               |      | N          | 5     | 5     | 2     |

Note: " = Pretest phase; # = Test period

CONFIDENTIAL  
Appendix 4  
ECG Examinations Data

Fexinidazole

Study Number: 0505-2007

| F e m a l e s |        | Animal No. |      |      |      |
|---------------|--------|------------|------|------|------|
| Dosage        |        | Day:       | -5"  | 24#  | 38   |
| mg/kg         | : 0.   | Session:   | S 1  | S 1  | S 1  |
| QRS           | ms     | 2560       | 42.  | 44.  |      |
|               |        | 2568       | 40.  | 43.  |      |
|               |        | 2572       | 45.  | 46.  |      |
|               |        | 2575       | 45.  | 49.  | 47.  |
|               |        | 2577       | 58.  | 57.  | 55.  |
|               |        | Mean       | 46.  | 48.  | 51.  |
|               |        | SD         | 7.0  | 5.6  | 5.7  |
|               |        | N          | 5    | 5    | 2    |
| QT            | ms     | 2560       | 189. | 206. |      |
|               |        | 2568       | 182. | 169. |      |
|               |        | 2572       | 175. | 181. |      |
|               |        | 2575       | 191. | 185. | 201. |
|               |        | 2577       | 188. | 189. | 186. |
|               |        | Mean       | 185. | 186. | 194. |
|               |        | SD         | 6.5  | 13.5 | 10.6 |
|               |        | N          | 5    | 5    | 2    |
| QTcF          | ms     | 2560       | 192. | 217. |      |
|               |        | 2568       | 212. | 215. |      |
|               |        | 2572       | 218. | 219. |      |
|               |        | 2575       | 216. | 210. | 218. |
|               |        | 2577       | 232. | 228. | 238. |
|               |        | Mean       | 214. | 218. | 228. |
|               |        | SD         | 14.3 | 6.7  | 14.4 |
|               |        | N          | 5    | 5    | 2    |
| MEA           | degree | 2560       | 101. | 114. |      |
|               |        | 2568       | 41.  | 53.  |      |
|               |        | 2572       | 34.  | 18.  |      |
|               |        | 2575       | 37.  | 44.  | 41.  |
|               |        | 2577       | 17.  | 37.  | 73.  |
|               |        | Mean       | 46.  | 53.  | 57.  |
|               |        | SD         | 32.1 | 36.3 | 22.6 |
|               |        | N          | 5    | 5    | 2    |

Note: " = Pretest phase; # = Test period



CONFIDENTIAL  
Appendix 4  
ECG Examinations Data

Fexinidazole

Study Number: 0505-2007

| F e m a l e s |      | Animal No. |       |       |       |
|---------------|------|------------|-------|-------|-------|
| Dosage        |      | Day:       | -5"   | 24#   | 38    |
| mg/kg         | : 0. | Session:   | S 1   | S 1   | S 1   |
| Pamp          | mV   | 2560       | 0.36  | 0.39  |       |
|               |      | 2568       | 0.44  | 0.44  |       |
|               |      | 2572       | 0.33  | 0.50  |       |
|               |      | 2575       | 0.08  | 0.32  | 0.30  |
|               |      | 2577       | 0.41  | 0.36  | 0.48  |
|               | Mean |            | 0.32  | 0.40  | 0.39  |
|               | SD   |            | 0.143 | 0.070 | 0.127 |
|               | N    |            | 5     | 5     | 2     |
| Qamp          | mV   | 2560       | -0.57 | -0.81 |       |
|               |      | 2568       | -0.22 | -0.29 |       |
|               |      | 2572       | -0.37 | -0.30 |       |
|               |      | 2575       | -0.34 | -0.35 | -0.40 |
|               |      | 2577       | -0.43 | -0.35 | -0.38 |
|               | Mean |            | -0.39 | -0.42 | -0.39 |
|               | SD   |            | 0.128 | 0.220 | 0.014 |
|               | N    |            | 5     | 5     | 2     |
| Ramp          | mV   | 2560       | 2.22  | 2.27  |       |
|               |      | 2568       | 2.37  | 2.64  |       |
|               |      | 2572       | 2.99  | 2.82  |       |
|               |      | 2575       | 2.56  | 3.23  | 2.92  |
|               |      | 2577       | 2.10  | 2.12  | 2.35  |
|               | Mean |            | 2.45  | 2.62  | 2.64  |
|               | SD   |            | 0.348 | 0.443 | 0.403 |
|               | N    |            | 5     | 5     | 2     |
| Samp          | mV   | 2560       | -0.19 | -0.17 |       |
|               |      | 2568       | -0.19 | -0.16 |       |
|               |      | 2572       | -0.20 | -0.61 |       |
|               |      | 2575       | -0.48 | 0.00  | -0.16 |
|               |      | 2577       | -0.50 | -0.38 | -0.56 |
|               | Mean |            | -0.31 | -0.26 | -0.36 |
|               | SD   |            | 0.163 | 0.236 | 0.283 |
|               | N    |            | 5     | 5     | 2     |

Note: " = Pretest phase; # = Test period

CONFIDENTIAL  
Appendix 4  
ECG Examinations Data

Fexinidazole

Study Number: 0505-2007

| F e m a l e s |      | Animal No. |       |       |       |
|---------------|------|------------|-------|-------|-------|
| Dosage        |      | Day:       | -5"   | 24#   | 38    |
| mg/kg         | : 0. | Session:   | S 1   | S 1   | S 1   |
| STd           | mV   | 2560       | -0.05 | -0.05 |       |
|               |      | 2568       | 0.00  | -0.06 |       |
|               |      | 2572       | -0.09 | -0.05 |       |
|               |      | 2575       | -0.08 | -0.03 | 0.00  |
|               |      | 2577       | 0.06  | 0.07  | 0.09  |
|               | Mean |            | -0.03 | -0.02 | 0.05  |
|               | SD   |            | 0.062 | 0.054 | 0.064 |
|               | N    |            | 5     | 5     | 2     |
| Tamp          | mV   | 2560       | 0.33  | 0.46  |       |
|               |      | 2568       | 0.53  | 0.61  |       |
|               |      | 2572       | 0.19  | 0.45  |       |
|               |      | 2575       | 0.04  | 0.44  | 0.36  |
|               |      | 2577       | -0.09 | 0.05  | -0.45 |
|               | Mean |            | 0.20  | 0.40  | -0.04 |
|               | SD   |            | 0.243 | 0.209 | 0.573 |
|               | N    |            | 5     | 5     | 2     |

Note: " = Pretest phase; # = Test period

CONFIDENTIAL  
Appendix 4  
ECG Examinations Data

Fexinidazole

Study Number: 0505-2007

| M a l e s   |     | Animal No. |       |       |     |
|-------------|-----|------------|-------|-------|-----|
| Dosage      |     | Day:       | -5"   | 24#   | 38  |
| mg/kg : 50. |     | Session:   | S 1   | S 1   | S 1 |
| HR          | bpm | 2514       | 67.   | 120.  |     |
|             |     | 2521       | 64.   | 58.   |     |
|             |     | 2529       | 114.  | 128.  |     |
|             |     | Mean       | 82.   | 102.  | -   |
|             | SD  | 28.0       | 38.3  | -     |     |
|             | N   | 3          | 3     | 0     |     |
| RR          | ms  | 2514       | 885.  | 499.  |     |
|             |     | 2521       | 929.  | 1029. |     |
|             |     | 2529       | 525.  | 466.  |     |
|             |     | Mean       | 780.  | 665.  | -   |
|             | SD  | 221.6      | 316.0 | -     |     |
|             | N   | 3          | 3     | 0     |     |
| Pdur        | ms  | 2514       | 37.   | 37.   |     |
|             |     | 2521       | 38.   | 33.   |     |
|             |     | 2529       | 35.   | 33.   |     |
|             |     | Mean       | 37.   | 34.   | -   |
|             | SD  | 1.5        | 2.3   | -     |     |
|             | N   | 3          | 3     | 0     |     |
| PR          | ms  | 2514       | 99.   | 85.   |     |
|             |     | 2521       | 81.   | 75.   |     |
|             |     | 2529       | 86.   | 87.   |     |
|             |     | Mean       | 89.   | 82.   | -   |
|             | SD  | 9.3        | 6.4   | -     |     |
|             | N   | 3          | 3     | 0     |     |
| QRS         | ms  | 2514       | 49.   | 47.   |     |
|             |     | 2521       | 45.   | 48.   |     |
|             |     | 2529       | 44.   | 41.   |     |
|             |     | Mean       | 46.   | 45.   | -   |
|             | SD  | 2.6        | 3.8   | -     |     |
|             | N   | 3          | 3     | 0     |     |
| QT          | ms  | 2514       | 193.  | 181.  |     |
|             |     | 2521       | 193.  | 203.  |     |
|             |     | 2529       | 173.  | 177.  |     |

Note: " = Pretest phase; # = Test period

CONFIDENTIAL  
Appendix 4  
ECG Examinations Data

Fexinidazole

Study Number: 0505-2007

| M a l e s   |        | Animal No. |       |       |     |
|-------------|--------|------------|-------|-------|-----|
| Dosage      |        | Day:       | -5"   | 24#   | 38  |
| mg/kg : 50. |        | Session:   | S 1   | S 1   | S 1 |
|             |        | Mean       | 186.  | 187.  | -   |
|             |        | SD         | 11.5  | 14.0  | -   |
|             |        | N          | 3     | 3     | 0   |
| QTcF        | ms     | 2514       | 201.  | 228.  |     |
|             |        | 2521       | 198.  | 201.  |     |
|             |        | 2529       | 214.  | 228.  |     |
|             |        | Mean       | 204.  | 219.  | -   |
|             |        | SD         | 8.6   | 15.4  | -   |
|             |        | N          | 3     | 3     | 0   |
| MEA         | degree | 2514       | 54.   | 59.   |     |
|             |        | 2521       | 62.   | 63.   |     |
|             |        | 2529       | 38.   | 50.   |     |
|             |        | Mean       | 51.   | 57.   | -   |
|             |        | SD         | 12.2  | 6.7   | -   |
|             |        | N          | 3     | 3     | 0   |
| Pamp        | mV     | 2514       | 0.35  | 0.40  |     |
|             |        | 2521       | 0.33  | 0.40  |     |
|             |        | 2529       | 0.41  | 0.38  |     |
|             |        | Mean       | 0.36  | 0.39  | -   |
|             |        | SD         | 0.042 | 0.012 | -   |
|             |        | N          | 3     | 3     | 0   |
| Qamp        | mV     | 2514       | -0.25 | -0.30 |     |
|             |        | 2521       | -0.33 | -0.39 |     |
|             |        | 2529       | -0.53 | -0.52 |     |
|             |        | Mean       | -0.37 | -0.40 | -   |
|             |        | SD         | 0.144 | 0.111 | -   |
|             |        | N          | 3     | 3     | 0   |
| Ramp        | mV     | 2514       | 2.84  | 3.00  |     |
|             |        | 2521       | 3.53  | 3.95  |     |
|             |        | 2529       | 2.60  | 2.57  |     |
|             |        | Mean       | 2.99  | 3.17  | -   |
|             |        | SD         | 0.483 | 0.706 | -   |
|             |        | N          | 3     | 3     | 0   |

Note: " = Pretest phase; # = Test period

CONFIDENTIAL  
Appendix 4  
ECG Examinations Data

Fexinidazole

Study Number: 0505-2007

| M a l e s |       | Animal No. |       |       |     |
|-----------|-------|------------|-------|-------|-----|
| Dosage    |       | Day:       | -5"   | 24#   | 38  |
| mg/kg     | : 50. | Session:   | S 1   | S 1   | S 1 |
| Samp      | mV    | 2514       | -0.05 | -0.10 |     |
|           |       | 2521       | -0.26 | -0.15 |     |
|           |       | 2529       | -0.10 | -0.14 |     |
|           | Mean  |            | -0.14 | -0.13 | -   |
|           | SD    |            | 0.110 | 0.026 | -   |
|           | N     |            | 3     | 3     | 0   |
| STd       | mV    | 2514       | 0.00  | 0.02  |     |
|           |       | 2521       | -0.02 | -0.13 |     |
|           |       | 2529       | -0.11 | -0.12 |     |
|           | Mean  |            | -0.04 | -0.08 | -   |
|           | SD    |            | 0.059 | 0.084 | -   |
|           | N     |            | 3     | 3     | 0   |
| Tamp      | mV    | 2514       | 0.26  | -0.05 |     |
|           |       | 2521       | -0.07 | -0.16 |     |
|           |       | 2529       | 0.10  | -0.38 |     |
|           | Mean  |            | 0.10  | -0.20 | -   |
|           | SD    |            | 0.165 | 0.168 | -   |
|           | N     |            | 3     | 3     | 0   |

Note: " = Pretest phase; # = Test period

CONFIDENTIAL  
Appendix 4  
ECG Examinations Data

Fexinidazole

Study Number: 0505-2007

| F e m a l e s |     | Animal No. | Day: | 24#  | 38  |
|---------------|-----|------------|------|------|-----|
| Dosage        |     |            | -5"  |      |     |
| mg/kg : 50.   |     | Session:   | S 1  | S 1  | S 1 |
| HR            | bpm | 2562       | 113. | 95.  |     |
|               |     | 2563       | 101. | 114. |     |
|               |     | 2576       | 133. | 116. |     |
|               |     | Mean       | 116. | 108. | -   |
|               | SD  | 16.2       | 11.6 | -    |     |
|               | N   | 3          | 3    | 0    |     |
| RR            | ms  | 2562       | 531. | 629. |     |
|               |     | 2563       | 589. | 522. |     |
|               |     | 2576       | 448. | 515. |     |
|               |     | Mean       | 523. | 555. | -   |
|               | SD  | 70.9       | 63.9 | -    |     |
|               | N   | 3          | 3    | 0    |     |
| Pdur          | ms  | 2562       | 35.  | 35.  |     |
|               |     | 2563       | 39.  | 37.  |     |
|               |     | 2576       | 36.  | 34.  |     |
|               |     | Mean       | 37.  | 35.  | -   |
|               | SD  | 2.1        | 1.5  | -    |     |
|               | N   | 3          | 3    | 0    |     |
| PR            | ms  | 2562       | 83.  | 89.  |     |
|               |     | 2563       | 85.  | 88.  |     |
|               |     | 2576       | 80.  | 89.  |     |
|               |     | Mean       | 83.  | 89.  | -   |
|               | SD  | 2.5        | 0.6  | -    |     |
|               | N   | 3          | 3    | 0    |     |
| QRS           | ms  | 2562       | 49.  | 49.  |     |
|               |     | 2563       | 45.  | 53.  |     |
|               |     | 2576       | 59.  | 41.  |     |
|               |     | Mean       | 51.  | 48.  | -   |
|               | SD  | 7.2        | 6.1  | -    |     |
|               | N   | 3          | 3    | 0    |     |
| QT            | ms  | 2562       | 179. | 195. |     |
|               |     | 2563       | 181. | 175. |     |
|               |     | 2576       | 181. | 182. |     |

Note: " = Pretest phase; # = Test period

CONFIDENTIAL  
Appendix 4  
ECG Examinations Data

Fexinidazole

Study Number: 0505-2007

| F e m a l e s |        | Animal No. |       |       |     |
|---------------|--------|------------|-------|-------|-----|
| Dosage        |        | Day:       | -5"   | 24#   | 38  |
| mg/kg         | : 50.  | Session:   | S 1   | S 1   | S 1 |
|               |        | Mean       | 180.  | 184.  | -   |
|               |        | SD         | 1.2   | 10.1  | -   |
|               |        | N          | 3     | 3     | 0   |
| QTcF          | ms     | 2562       | 221.  | 227.  |     |
|               |        | 2563       | 216.  | 217.  |     |
|               |        | 2576       | 236.  | 227.  |     |
|               |        | Mean       | 224.  | 224.  | -   |
|               |        | SD         | 10.6  | 5.8   | -   |
|               |        | N          | 3     | 3     | 0   |
| MEA           | degree | 2562       | 55.   | 45.   |     |
|               |        | 2563       | 40.   | 61.   |     |
|               |        | 2576       | 36.   | 61.   |     |
|               |        | Mean       | 44.   | 56.   | -   |
|               |        | SD         | 10.0  | 9.2   | -   |
|               |        | N          | 3     | 3     | 0   |
| Pamp          | mV     | 2562       | 0.30  | 0.35  |     |
|               |        | 2563       | 0.32  | 0.38  |     |
|               |        | 2576       | 0.55  | 0.47  |     |
|               |        | Mean       | 0.39  | 0.40  | -   |
|               |        | SD         | 0.139 | 0.062 | -   |
|               |        | N          | 3     | 3     | 0   |
| Qamp          | mV     | 2562       | -1.10 | -0.83 |     |
|               |        | 2563       | -0.58 | -0.51 |     |
|               |        | 2576       | -0.34 | -0.36 |     |
|               |        | Mean       | -0.67 | -0.57 | -   |
|               |        | SD         | 0.389 | 0.240 | -   |
|               |        | N          | 3     | 3     | 0   |
| Ramp          | mV     | 2562       | 3.21  | 2.76  |     |
|               |        | 2563       | 1.58  | 1.87  |     |
|               |        | 2576       | 2.13  | 3.23  |     |
|               |        | Mean       | 2.31  | 2.62  | -   |
|               |        | SD         | 0.829 | 0.691 | -   |
|               |        | N          | 3     | 3     | 0   |

Note: " = Pretest phase; # = Test period

CONFIDENTIAL  
Appendix 4  
ECG Examinations Data

Fexinidazole

Study Number: 0505-2007

| F e m a l e s |       | Animal No. |       |       |     |
|---------------|-------|------------|-------|-------|-----|
| Dosage        |       | Day:       | -5"   | 24#   | 38  |
| mg/kg         | : 50. | Session:   | S 1   | S 1   | S 1 |
| Samp          | mV    | 2562       | -0.15 | -0.03 |     |
|               |       | 2563       | -0.27 | -0.58 |     |
|               |       | 2576       | -0.48 | -0.52 |     |
|               | Mean  |            | -0.30 | -0.38 | -   |
|               | SD    |            | 0.167 | 0.302 | -   |
|               | N     |            | 3     | 3     | 0   |
| STd           | mV    | 2562       | -0.19 | -0.05 |     |
|               |       | 2563       | -0.06 | 0.02  |     |
|               |       | 2576       | 0.14  | -0.04 |     |
|               | Mean  |            | -0.04 | -0.02 | -   |
|               | SD    |            | 0.166 | 0.038 | -   |
|               | N     |            | 3     | 3     | 0   |
| Tamp          | mV    | 2562       | -0.58 | -0.30 |     |
|               |       | 2563       | -0.30 | 0.32  |     |
|               |       | 2576       | 0.23  | 0.08  |     |
|               | Mean  |            | -0.22 | 0.03  | -   |
|               | SD    |            | 0.411 | 0.313 | -   |
|               | N     |            | 3     | 3     | 0   |

Note: " = Pretest phase; # = Test period



CONFIDENTIAL  
Appendix 4  
ECG Examinations Data

Fexinidazole

Study Number: 0505-2007

| M a l e s    |     | Animal No. | Day:  | 24#   | 38  |
|--------------|-----|------------|-------|-------|-----|
| Dosage       |     |            | -5"   |       |     |
| mg/kg : 200. |     | Session:   | S 1   | S 1   | S 1 |
| HR           | bpm | 2515       | 63.   | 71.   |     |
|              |     | 2523       | 77.   | 81.   |     |
|              |     | 2526       | 102.  | 139.  |     |
|              |     | Mean       | 81.   | 97.   | -   |
|              |     | SD         | 19.8  | 36.7  | -   |
|              |     | N          | 3     | 3     | 0   |
| RR           | ms  | 2515       | 951.  | 839.  |     |
|              |     | 2523       | 773.  | 738.  |     |
|              |     | 2526       | 583.  | 430.  |     |
|              |     | Mean       | 769.  | 669.  | -   |
|              |     | SD         | 184.0 | 213.1 | -   |
|              |     | N          | 3     | 3     | 0   |
| Pdur         | ms  | 2515       | 35.   | 35.   |     |
|              |     | 2523       | 42.   | 41.   |     |
|              |     | 2526       | 34.   | 43.   |     |
|              |     | Mean       | 37.   | 40.   | -   |
|              |     | SD         | 4.4   | 4.2   | -   |
|              |     | N          | 3     | 3     | 0   |
| PR           | ms  | 2515       | 95.   | 88.   |     |
|              |     | 2523       | 98.   | 84.   |     |
|              |     | 2526       | 99.   | 99.   |     |
|              |     | Mean       | 97.   | 90.   | -   |
|              |     | SD         | 2.1   | 7.8   | -   |
|              |     | N          | 3     | 3     | 0   |
| QRS          | ms  | 2515       | 60.   | 51.   |     |
|              |     | 2523       | 61.   | 61.   |     |
|              |     | 2526       | 45.   | 46.   |     |
|              |     | Mean       | 55.   | 53.   | -   |
|              |     | SD         | 9.0   | 7.6   | -   |
|              |     | N          | 3     | 3     | 0   |
| QT           | ms  | 2515       | 195.  | 197.  |     |
|              |     | 2523       | 201.  | 204.  |     |
|              |     | 2526       | 175.  | 187.  |     |

Note: " = Pretest phase; # = Test period

CONFIDENTIAL  
Appendix 4  
ECG Examinations Data

Fexinidazole

Study Number: 0505-2007

| M a l e s    |        | Animal No. |       |       |     |
|--------------|--------|------------|-------|-------|-----|
| Dosage       |        | Day:       | -5"   | 24#   | 38  |
| mg/kg : 200. |        | Session:   | S 1   | S 1   | S 1 |
|              |        | Mean       | 190.  | 196.  | -   |
|              |        | SD         | 13.6  | 8.5   | -   |
|              |        | N          | 3     | 3     | 0   |
| QTcF         | ms     | 2515       | 198.  | 209.  |     |
|              |        | 2523       | 219.  | 226.  |     |
|              |        | 2526       | 209.  | 247.  |     |
|              |        | Mean       | 209.  | 227.  | -   |
|              |        | SD         | 10.3  | 19.2  | -   |
|              |        | N          | 3     | 3     | 0   |
| MEA          | degree | 2515       | 46.   | 59.   |     |
|              |        | 2523       | 70.   | 63.   |     |
|              |        | 2526       | 62.   | 62.   |     |
|              |        | Mean       | 59.   | 61.   | -   |
|              |        | SD         | 12.2  | 2.1   | -   |
|              |        | N          | 3     | 3     | 0   |
| Pamp         | mV     | 2515       | 0.37  | 0.34  |     |
|              |        | 2523       | 0.39  | 0.41  |     |
|              |        | 2526       | 0.28  | 0.39  |     |
|              |        | Mean       | 0.35  | 0.38  | -   |
|              |        | SD         | 0.059 | 0.036 | -   |
|              |        | N          | 3     | 3     | 0   |
| Qamp         | mV     | 2515       | -0.76 | -0.55 |     |
|              |        | 2523       | -0.47 | -1.12 |     |
|              |        | 2526       | -0.28 | -0.21 |     |
|              |        | Mean       | -0.50 | -0.63 | -   |
|              |        | SD         | 0.242 | 0.460 | -   |
|              |        | N          | 3     | 3     | 0   |
| Ramp         | mV     | 2515       | 3.42  | 3.58  |     |
|              |        | 2523       | 2.53  | 3.10  |     |
|              |        | 2526       | 3.08  | 3.03  |     |
|              |        | Mean       | 3.01  | 3.24  | -   |
|              |        | SD         | 0.449 | 0.299 | -   |
|              |        | N          | 3     | 3     | 0   |

Note: " = Pretest phase; # = Test period

CONFIDENTIAL  
Appendix 4  
ECG Examinations Data

Fexinidazole

Study Number: 0505-2007

| M a l e s |        | Animal No. |       |       |     |
|-----------|--------|------------|-------|-------|-----|
| Dosage    |        | Day:       | -5"   | 24#   | 38  |
| mg/kg     | : 200. | Session:   | S 1   | S 1   | S 1 |
| Samp      | mV     | 2515       | -0.07 | -0.08 |     |
|           |        | 2523       | -0.07 | -0.07 |     |
|           |        | 2526       | -0.17 | -0.32 |     |
|           | Mean   |            | -0.10 | -0.16 | -   |
|           | SD     |            | 0.058 | 0.142 | -   |
|           | N      |            | 3     | 3     | 0   |
| STd       | mV     | 2515       | -0.07 | -0.09 |     |
|           |        | 2523       | -0.07 | -0.04 |     |
|           |        | 2526       | -0.17 | -0.17 |     |
|           | Mean   |            | -0.10 | -0.10 | -   |
|           | SD     |            | 0.058 | 0.066 | -   |
|           | N      |            | 3     | 3     | 0   |
| Tamp      | mV     | 2515       | 0.22  | -0.13 |     |
|           |        | 2523       | 0.36  | 0.40  |     |
|           |        | 2526       | -0.08 | -0.22 |     |
|           | Mean   |            | 0.17  | 0.02  | -   |
|           | SD     |            | 0.225 | 0.335 | -   |
|           | N      |            | 3     | 3     | 0   |

Note: " = Pretest phase; # = Test period

CONFIDENTIAL  
Appendix 4  
ECG Examinations Data

Fexinidazole

Study Number: 0505-2007

| F e m a l e s |     | Animal No. | Day: | 24#  | 38  |
|---------------|-----|------------|------|------|-----|
| Dosage        |     |            | -5"  |      |     |
| mg/kg : 200.  |     | Session:   | S 1  | S 1  | S 1 |
| HR            | bpm | 2561       | 83.  | 95.  |     |
|               |     | 2570       | 116. | 120. |     |
|               |     | 2567       | 81.  | 120. |     |
|               |     | Mean       | 93.  | 112. | -   |
|               | SD  | 19.7       | 14.4 | -    |     |
|               | N   | 3          | 3    | 0    |     |
| RR            | ms  | 2561       | 719. | 631. |     |
|               |     | 2570       | 515. | 499. |     |
|               |     | 2567       | 741. | 500. |     |
|               |     | Mean       | 658. | 543. | -   |
|               | SD  | 124.6      | 75.9 | -    |     |
|               | N   | 3          | 3    | 0    |     |
| Pdur          | ms  | 2561       | 37.  | 39.  |     |
|               |     | 2570       | 40.  | 41.  |     |
|               |     | 2567       | 37.  | 40.  |     |
|               |     | Mean       | 38.  | 40.  | -   |
|               | SD  | 1.7        | 1.0  | -    |     |
|               | N   | 3          | 3    | 0    |     |
| PR            | ms  | 2561       | 85.  | 84.  |     |
|               |     | 2570       | 95.  | 87.  |     |
|               |     | 2567       | 95.  | 89.  |     |
|               |     | Mean       | 92.  | 87.  | -   |
|               | SD  | 5.8        | 2.5  | -    |     |
|               | N   | 3          | 3    | 0    |     |
| QRS           | ms  | 2561       | 46.  | 49.  |     |
|               |     | 2570       | 45.  | 53.  |     |
|               |     | 2567       | 55.  | 56.  |     |
|               |     | Mean       | 49.  | 53.  | -   |
|               | SD  | 5.5        | 3.5  | -    |     |
|               | N   | 3          | 3    | 0    |     |
| QT            | ms  | 2561       | 189. | 197. |     |
|               |     | 2570       | 171. | 183. |     |
|               |     | 2567       | 188. | 195. |     |

Note: " = Pretest phase; # = Test period

CONFIDENTIAL  
Appendix 4  
ECG Examinations Data

Fexinidazole

Study Number: 0505-2007

| F e m a l e s |        | Animal No. | Day:  | 24#   | 38  |
|---------------|--------|------------|-------|-------|-----|
| Dosage        |        | mg/kg      | 200.  | S 1   | S 1 |
|               |        | Mean       | 183.  | 192.  | -   |
|               |        | SD         | 10.1  | 7.6   | -   |
|               |        | N          | 3     | 3     | 0   |
| QTcF          | ms     | 2561       | 211.  | 229.  |     |
|               |        | 2570       | 213.  | 230.  |     |
|               |        | 2567       | 208.  | 245.  |     |
|               |        | Mean       | 210.  | 235.  | -   |
|               |        | SD         | 2.7   | 8.9   | -   |
|               |        | N          | 3     | 3     | 0   |
| MEA           | degree | 2561       | 63.   | 60.   |     |
|               |        | 2570       | 54.   | 62.   |     |
|               |        | 2567       | 10.   | 28.   |     |
|               |        | Mean       | 42.   | 50.   | -   |
|               |        | SD         | 28.4  | 19.1  | -   |
|               |        | N          | 3     | 3     | 0   |
| Pamp          | mV     | 2561       | 0.39  | 0.30  |     |
|               |        | 2570       | 0.54  | 0.63  |     |
|               |        | 2567       | 0.39  | 0.51  |     |
|               |        | Mean       | 0.44  | 0.48  | -   |
|               |        | SD         | 0.087 | 0.167 | -   |
|               |        | N          | 3     | 3     | 0   |
| Qamp          | mV     | 2561       | -0.85 | -0.71 |     |
|               |        | 2570       | -0.70 | -0.80 |     |
|               |        | 2567       | -0.53 | -0.53 |     |
|               |        | Mean       | -0.69 | -0.68 | -   |
|               |        | SD         | 0.160 | 0.137 | -   |
|               |        | N          | 3     | 3     | 0   |
| Ramp          | mV     | 2561       | 2.92  | 2.72  |     |
|               |        | 2570       | 3.16  | 3.98  |     |
|               |        | 2567       | 2.06  | 2.46  |     |
|               |        | Mean       | 2.71  | 3.05  | -   |
|               |        | SD         | 0.578 | 0.813 | -   |
|               |        | N          | 3     | 3     | 0   |

Note: " = Pretest phase; # = Test period

CONFIDENTIAL  
Appendix 4  
ECG Examinations Data

Fexinidazole

Study Number: 0505-2007

| F e m a l e s |        | Animal No. |       |       |     |
|---------------|--------|------------|-------|-------|-----|
| Dosage        |        | Day:       | -5"   | 24#   | 38  |
| mg/kg         | : 200. | Session:   | S 1   | S 1   | S 1 |
| Samp          | mV     | 2561       | -0.18 | -0.18 |     |
|               |        | 2570       | -0.03 | -0.05 |     |
|               |        | 2567       | -0.48 | -0.54 |     |
|               | Mean   |            | -0.23 | -0.26 | -   |
|               | SD     |            | 0.229 | 0.254 | -   |
|               | N      |            | 3     | 3     | 0   |
| STd           | mV     | 2561       | -0.08 | -0.08 |     |
|               |        | 2570       | -0.04 | -0.06 |     |
|               |        | 2567       | -0.03 | -0.11 |     |
|               | Mean   |            | -0.05 | -0.08 | -   |
|               | SD     |            | 0.026 | 0.025 | -   |
|               | N      |            | 3     | 3     | 0   |
| Tamp          | mV     | 2561       | 0.34  | 0.32  |     |
|               |        | 2570       | 0.61  | 0.47  |     |
|               |        | 2567       | 0.71  | 0.59  |     |
|               | Mean   |            | 0.55  | 0.46  | -   |
|               | SD     |            | 0.191 | 0.135 | -   |
|               | N      |            | 3     | 3     | 0   |

Note: " = Pretest phase; # = Test period

CONFIDENTIAL  
Appendix 4  
ECG Examinations Data

Fexinidazole

Study Number: 0505-2007

| M a l e s    |       | Animal No. |      |      |      |       |  |  |  |
|--------------|-------|------------|------|------|------|-------|--|--|--|
| Dosage       |       | Day:       |      | 24#  |      | 38    |  |  |  |
| mg/kg : 800. |       | Session:   |      | S 1  |      | S 1   |  |  |  |
| HR           | bpm   | 2517       | 126. | 88.  |      |       |  |  |  |
|              |       | 2519       | 80.  | 85.  |      |       |  |  |  |
|              |       | 2525       | 60.  | 104. |      |       |  |  |  |
|              |       | 2528       | 108. | 116. |      | 116.  |  |  |  |
|              |       | 2530       | 101. | 107. |      | 66.   |  |  |  |
|              |       | Mean       | 95.  | 100. |      | 91.   |  |  |  |
|              |       | SD         | 25.6 | 13.1 |      | 35.4  |  |  |  |
|              |       | N          | 5    | 5    |      | 2     |  |  |  |
|              |       | RR         | ms   | 2517 | 474. | 680.  |  |  |  |
|              |       |            |      | 2519 | 749. | 706.  |  |  |  |
| 2525         | 991.  |            |      | 575. |      |       |  |  |  |
| 2528         | 551.  |            |      | 514. |      | 514.  |  |  |  |
| 2530         | 593.  |            |      | 557. |      | 901.  |  |  |  |
| Mean         | 672.  |            |      | 606. |      | 708.  |  |  |  |
| SD           | 204.8 |            |      | 82.6 |      | 273.7 |  |  |  |
| N            | 5     |            |      | 5    |      | 2     |  |  |  |
| Pdur         | ms    |            |      | 2517 | 42.  | 39.   |  |  |  |
|              |       |            |      | 2519 | 37.  | 34.   |  |  |  |
|              |       | 2525       | 36.  | 35.  |      |       |  |  |  |
|              |       | 2528       | 43.  | 43.  |      | 44.   |  |  |  |
|              |       | 2530       | 39.  | 35.  |      | 39.   |  |  |  |
|              |       | Mean       | 39.  | 37.  |      | 42.   |  |  |  |
|              |       | SD         | 3.0  | 3.8  |      | 3.5   |  |  |  |
|              |       | N          | 5    | 5    |      | 2     |  |  |  |
|              |       | PR         | ms   | 2517 | 81.  | 90.   |  |  |  |
|              |       |            |      | 2519 | 75.  | 77.   |  |  |  |
| 2525         | 90.   |            |      | 83.  |      |       |  |  |  |
| 2528         | 89.   |            |      | 90.  |      | 99.   |  |  |  |
| 2530         | 97.   |            |      | 90.  |      | 103.  |  |  |  |
| Mean         | 86.   |            |      | 86.  |      | 101.  |  |  |  |
| SD           | 8.5   |            |      | 5.9  |      | 2.8   |  |  |  |
| N            | 5     |            |      | 5    |      | 2     |  |  |  |

Note: " = Pretest phase; # = Test period

CONFIDENTIAL  
Appendix 4  
ECG Examinations Data

Fexinidazole

Study Number: 0505-2007

| M a l e s    |        | Animal No. |      |      |      |
|--------------|--------|------------|------|------|------|
| Dosage       |        | Day:       | -5"  | 24#  | 38   |
| mg/kg : 800. |        | Session:   | S 1  | S 1  | S 1  |
| QRS          | ms     | 2517       | 44.  | 44.  |      |
|              |        | 2519       | 43.  | 46.  |      |
|              |        | 2525       | 43.  | 41.  |      |
|              |        | 2528       | 45.  | 44.  | 43.  |
|              |        | 2530       | 46.  | 45.  | 59.  |
|              |        | Mean       | 44.  | 44.  | 51.  |
|              |        | SD         | 1.3  | 1.9  | 11.3 |
|              | N      | 5          | 5    | 2    |      |
| QT           | ms     | 2517       | 175. | 204. |      |
|              |        | 2519       | 179. | 201. |      |
|              |        | 2525       | 181. | 185. |      |
|              |        | 2528       | 189. | 203. | 192. |
|              |        | 2530       | 171. | 193. | 213. |
|              |        | Mean       | 179. | 197. | 203. |
|              |        | SD         | 6.8  | 8.1  | 14.8 |
|              | N      | 5          | 5    | 2    |      |
| QTcF         | ms     | 2517       | 224. | 232. |      |
|              |        | 2519       | 197. | 225. |      |
|              |        | 2525       | 182. | 222. |      |
|              |        | 2528       | 230. | 253. | 239. |
|              |        | 2530       | 203. | 234. | 220. |
|              |        | Mean       | 207. | 233. | 230. |
|              |        | SD         | 19.9 | 12.0 | 13.2 |
|              | N      | 5          | 5    | 2    |      |
| MEA          | degree | 2517       | 30.  | 41.  |      |
|              |        | 2519       | 34.  | 57.  |      |
|              |        | 2525       | 58.  | 47.  |      |
|              |        | 2528       | 40.  | 71.  | 78.  |
|              |        | 2530       | 30.  | 99.  | 89.  |
|              |        | Mean       | 38.  | 63.  | 84.  |
|              |        | SD         | 11.7 | 23.1 | 7.8  |
|              | N      | 5          | 5    | 2    |      |

Note: " = Pretest phase; # = Test period



CONFIDENTIAL  
Appendix 4  
ECG Examinations Data

Fexinidazole

Study Number: 0505-2007

| M a l e s    |    | Animal No. |       |       |       |
|--------------|----|------------|-------|-------|-------|
| Dosage       |    | Day:       | -5"   | 24#   | 38    |
| mg/kg : 800. |    | Session:   | S 1   | S 1   | S 1   |
| Pamp         | mV | 2517       | 0.53  | 0.54  |       |
|              |    | 2519       | 0.46  | 0.45  |       |
|              |    | 2525       | 0.36  | 0.38  |       |
|              |    | 2528       | 0.42  | 0.33  | 0.44  |
|              |    | 2530       | 0.29  | 0.35  | 0.33  |
|              |    | Mean       | 0.41  | 0.41  | 0.39  |
|              |    | SD         | 0.092 | 0.086 | 0.078 |
|              | N  | 5          | 5     | 2     |       |
| Qamp         | mV | 2517       | -0.24 | -0.16 |       |
|              |    | 2519       | -0.47 | -0.44 |       |
|              |    | 2525       | -0.73 | -0.64 |       |
|              |    | 2528       | -0.41 | -0.55 | -0.21 |
|              |    | 2530       | -0.56 | -0.97 | -0.47 |
|              |    | Mean       | -0.48 | -0.55 | -0.34 |
|              |    | SD         | 0.181 | 0.295 | 0.184 |
|              | N  | 5          | 5     | 2     |       |
| Ramp         | mV | 2517       | 1.97  | 1.97  |       |
|              |    | 2519       | 2.41  | 2.64  |       |
|              |    | 2525       | 2.86  | 2.75  |       |
|              |    | 2528       | 2.02  | 1.95  | 2.46  |
|              |    | 2530       | 1.59  | 1.95  | 1.99  |
|              |    | Mean       | 2.17  | 2.25  | 2.23  |
|              |    | SD         | 0.483 | 0.406 | 0.332 |
|              | N  | 5          | 5     | 2     |       |
| Samp         | mV | 2517       | -0.30 | -0.43 |       |
|              |    | 2519       | -0.15 | -0.27 |       |
|              |    | 2525       | -0.13 | -0.09 |       |
|              |    | 2528       | -0.12 | -0.18 | -0.18 |
|              |    | 2530       | -0.10 | -0.17 | -0.16 |
|              |    | Mean       | -0.16 | -0.23 | -0.17 |
|              |    | SD         | 0.080 | 0.130 | 0.014 |
|              | N  | 5          | 5     | 2     |       |

Note: " = Pretest phase; # = Test period

CONFIDENTIAL  
Appendix 4  
ECG Examinations Data

Fexinidazole

Study Number: 0505-2007

| M a l e s |        | Animal No. |       |       |       |       |  |
|-----------|--------|------------|-------|-------|-------|-------|--|
| Dosage    |        | Day:       | -5"   | 24#   | 38    |       |  |
| mg/kg     | : 800. | Session:   | S 1   | S 1   | S 1   |       |  |
| <hr/>     |        |            |       |       |       |       |  |
| STd       | mV     | 2517       | -0.05 | 0.00  |       |       |  |
|           |        | 2519       | -0.04 | -0.08 |       |       |  |
|           |        | 2525       | -0.04 | 0.00  |       |       |  |
|           |        | 2528       | -0.10 | -0.18 | -0.06 |       |  |
|           |        | 2530       | -0.07 | -0.11 | -0.08 |       |  |
|           |        | Mean       | -0.06 | -0.07 | -0.07 |       |  |
|           |        | SD         | 0.025 | 0.077 | 0.014 |       |  |
|           |        | N          | 5     | 5     | 2     |       |  |
|           |        | Tamp       | mV    | 2517  | 0.29  | 0.20  |  |
|           |        |            |       | 2519  | 0.34  | -0.27 |  |
| 2525      | -0.47  |            |       | -0.09 |       |       |  |
| 2528      | 0.33   |            |       | -0.13 | 0.46  |       |  |
| 2530      | 0.26   |            |       | -0.39 | 0.08  |       |  |
| Mean      | 0.15   |            |       | -0.14 | 0.27  |       |  |
| SD        | 0.348  |            |       | 0.222 | 0.269 |       |  |
| N         | 5      |            |       | 5     | 2     |       |  |

Note: " = Pretest phase; # = Test period

CONFIDENTIAL  
Appendix 4  
ECG Examinations Data

Fexinidazole

Study Number: 0505-2007

| F e m a l e s |        | Animal No. |       |       |       |
|---------------|--------|------------|-------|-------|-------|
| Dosage        |        | Day:       | -5"   | 24#   | 38    |
| mg/kg         | : 800. | Session:   | S 1   | S 1   | S 1   |
| HR            | bpm    | 2564       | 89.   | 107.  |       |
|               |        | 2565       | 87.   | 84.   |       |
|               |        | 2569       | 108.  | 151.  |       |
|               |        | 2571       | 136.  | 134.  | 122.  |
|               |        | 2573       | 92.   | 75.   | 82.   |
|               |        | Mean       | 102.  | 110.  | 102.  |
|               |        | SD         | 20.5  | 32.3  | 28.3  |
|               |        | N          | 5     | 5     | 2     |
| RR            | ms     | 2564       | 667.  | 558.  |       |
|               |        | 2565       | 687.  | 706.  |       |
|               |        | 2569       | 552.  | 395.  |       |
|               |        | 2571       | 441.  | 446.  | 489.  |
|               |        | 2573       | 648.  | 796.  | 728.  |
|               |        | Mean       | 599.  | 580.  | 609.  |
|               |        | SD         | 102.4 | 169.7 | 169.0 |
|               |        | N          | 5     | 5     | 2     |
| Pdur          | ms     | 2564       | 33.   | 39.   |       |
|               |        | 2565       | 37.   | 36.   |       |
|               |        | 2569       | 35.   | 45.   |       |
|               |        | 2571       | 35.   | 35.   | 38.   |
|               |        | 2573       | 39.   | 35.   | 42.   |
|               |        | Mean       | 36.   | 38.   | 40.   |
|               |        | SD         | 2.3   | 4.2   | 2.8   |
|               |        | N          | 5     | 5     | 2     |
| PR            | ms     | 2564       | 105.  | 103.  |       |
|               |        | 2565       | 89.   | 83.   |       |
|               |        | 2569       | 77.   | 85.   |       |
|               |        | 2571       | 88.   | 79.   | 91.   |
|               |        | 2573       | 78.   | 79.   | 88.   |
|               |        | Mean       | 87.   | 86.   | 90.   |
|               |        | SD         | 11.3  | 10.0  | 2.1   |
|               |        | N          | 5     | 5     | 2     |

Note: " = Pretest phase; # = Test period

CONFIDENTIAL  
Appendix 4  
ECG Examinations Data

Fexinidazole

Study Number: 0505-2007

| F e m a l e s |        | Animal No. | Day:       | 24#  | 38   |
|---------------|--------|------------|------------|------|------|
| Dosage        | : 800. | Session:   | -5"<br>S 1 | S 1  | S 1  |
| QRS           | ms     | 2564       | 49.        | 49.  |      |
|               |        | 2565       | 39.        | 44.  |      |
|               |        | 2569       | 59.        | 59.  |      |
|               |        | 2571       | 62.        | 63.  | 54.  |
|               |        | 2573       | 40.        | 49.  | 43.  |
|               |        | Mean       | 50.        | 53.  | 49.  |
|               |        | SD         | 10.6       | 7.9  | 7.8  |
| QT            | ms     | 2564       | 180.       | 191. |      |
|               |        | 2565       | 177.       | 196. |      |
|               |        | 2569       | 182.       | 168. |      |
|               |        | 2571       | 166.       | 189. | 196. |
|               |        | 2573       | 180.       | 214. | 211. |
|               |        | Mean       | 177.       | 192. | 204. |
|               |        | SD         | 6.4        | 16.5 | 10.6 |
| QTcF          | ms     | 2564       | 206.       | 232. |      |
|               |        | 2565       | 200.       | 220. |      |
|               |        | 2569       | 221.       | 228. |      |
|               |        | 2571       | 217.       | 247. | 248. |
|               |        | 2573       | 208.       | 231. | 234. |
|               |        | Mean       | 211.       | 231. | 241. |
|               |        | SD         | 8.7        | 9.7  | 9.8  |
| MEA           | degree | 2564       | 56.        | 57.  |      |
|               |        | 2565       | 7.         | 12.  |      |
|               |        | 2569       | 59.        | 64.  |      |
|               |        | 2571       | 57.        | 63.  | 65.  |
|               |        | 2573       | 71.        | 71.  | 74.  |
|               |        | Mean       | 50.        | 53.  | 70.  |
|               |        | SD         | 24.8       | 23.7 | 6.4  |
|               | N      | 5          | 5          | 2    |      |

Note: " = Pretest phase; # = Test period

CONFIDENTIAL  
Appendix 4  
ECG Examinations Data

Fexinidazole

Study Number: 0505-2007

| F e m a l e s |    | Animal No. |       |       |       |
|---------------|----|------------|-------|-------|-------|
| Dosage        |    | Day:       | -5"   | 24#   | 38    |
| mg/kg : 800.  |    | Session:   | S 1   | S 1   | S 1   |
| Pamp          | mV | 2564       | 0.30  | 0.20  |       |
|               |    | 2565       | 0.32  | 0.46  |       |
|               |    | 2569       | 0.50  | 0.64  |       |
|               |    | 2571       | 0.43  | 0.37  | 0.46  |
|               |    | 2573       | 0.29  | 0.35  | 0.26  |
|               |    | Mean       | 0.37  | 0.40  | 0.36  |
|               |    | SD         | 0.093 | 0.162 | 0.141 |
|               | N  | 5          | 5     | 2     |       |
| Qamp          | mV | 2564       | -0.20 | -0.06 |       |
|               |    | 2565       | -0.38 | -0.48 |       |
|               |    | 2569       | -0.76 | -0.60 |       |
|               |    | 2571       | -0.99 | -0.89 | -0.65 |
|               |    | 2573       | -0.23 | -0.29 | -0.27 |
|               |    | Mean       | -0.51 | -0.46 | -0.46 |
|               |    | SD         | 0.348 | 0.314 | 0.269 |
|               | N  | 5          | 5     | 2     |       |
| Ramp          | mV | 2564       | 2.63  | 2.23  |       |
|               |    | 2565       | 1.52  | 1.62  |       |
|               |    | 2569       | 4.36  | 3.98  |       |
|               |    | 2571       | 4.53  | 4.30  | 3.90  |
|               |    | 2573       | 1.96  | 2.29  | 2.06  |
|               |    | Mean       | 3.00  | 2.88  | 2.98  |
|               |    | SD         | 1.378 | 1.182 | 1.301 |
|               | N  | 5          | 5     | 2     |       |
| Samp          | mV | 2564       | -0.13 | 0.00  |       |
|               |    | 2565       | -0.17 | -0.19 |       |
|               |    | 2569       | -0.05 | -0.18 |       |
|               |    | 2571       | -0.19 | -0.11 | -0.06 |
|               |    | 2573       | -0.06 | -0.13 | -0.12 |
|               |    | Mean       | -0.12 | -0.12 | -0.09 |
|               |    | SD         | 0.063 | 0.076 | 0.042 |
|               | N  | 5          | 5     | 2     |       |

Note: " = Pretest phase; # = Test period

CONFIDENTIAL  
Appendix 4  
ECG Examinations Data

Fexinidazole

Study Number: 0505-2007

| F e m a l e s |        | Animal No. |       |       |       |
|---------------|--------|------------|-------|-------|-------|
| Dosage        |        | Day:       | -5"   | 24#   | 38    |
| mg/kg         | : 800. | Session:   | S 1   | S 1   | S 1   |
| <hr/>         |        |            |       |       |       |
| STd           | mV     | 2564       | -0.13 | 0.06  |       |
|               |        | 2565       | -0.13 | -0.11 |       |
|               |        | 2569       | -0.04 | -0.12 |       |
|               |        | 2571       | -0.06 | -0.07 | -0.05 |
|               |        | 2573       | 0.01  | -0.06 | 0.05  |
|               | Mean   |            | -0.07 | -0.06 | 0.00  |
|               | SD     |            | 0.060 | 0.072 | 0.071 |
|               | N      |            | 5     | 5     | 2     |
| Tamp          | mV     | 2564       | -0.35 | 0.11  |       |
|               |        | 2565       | 0.32  | -0.07 |       |
|               |        | 2569       | -0.04 | -0.29 |       |
|               |        | 2571       | 0.26  | 0.27  | 0.23  |
|               |        | 2573       | 0.04  | -0.14 | 0.13  |
|               | Mean   |            | 0.05  | -0.02 | 0.18  |
|               | SD     |            | 0.267 | 0.218 | 0.071 |
|               | N      |            | 5     | 5     | 2     |

Note: " = Pretest phase; # = Test period

## ***Appendix 5 Ophthalmoscopic Examination***

CONFIDENTIAL

Appendix 5  
Individual Animal Ophthalmoscopic Observations

Fexinidazole

Study Number: 0505-2007

M a l e s

| Animal Number | Dose         | Clinical Signs | Study Day(s) Noted                    |
|---------------|--------------|----------------|---------------------------------------|
| 2516          | Vehicle      | NORMAL         | Pretest phase -5<br>Test period 24    |
| 2518          | Vehicle      | NORMAL         | Pretest phase -5<br>Test period 24    |
| 2520          | Vehicle      | NORMAL         | Pretest phase -5<br>Test period 24    |
| 2527          | Vehicle      | NORMAL         | Pretest phase -5<br>Test period 24,38 |
| 2533          | Vehicle      | NORMAL         | Pretest phase -5<br>Test period 24,38 |
| 2514          | 50mg/kg/day  | NORMAL         | Pretest phase -5<br>Test period 24    |
| 2521          | 50mg/kg/day  | NORMAL         | Pretest phase -5<br>Test period 24    |
| 2529          | 50mg/kg/day  | NORMAL         | Pretest phase -5<br>Test period 24    |
| 2515          | 200mg/kg/day | NORMAL         | Pretest phase -5<br>Test period 24    |
| 2523          | 200mg/kg/day | NORMAL         | Pretest phase -5<br>Test period 24    |
| 2526          | 200mg/kg/day | NORMAL         | Pretest phase -5<br>Test period 24    |



CONFIDENTIAL

Appendix 5  
Individual Animal Ophthalmoscopic Observations

Fexinidazole

Study Number: 0505-2007

M a l e s

| Animal Number | Dose         | Clinical Signs | Study Day(s) Noted                    |
|---------------|--------------|----------------|---------------------------------------|
| 2517          | 800mg/kg/day | NORMAL         | Pretest phase -5<br>Test period 24    |
| 2519          | 800mg/kg/day | NORMAL         | Pretest phase -5<br>Test period 24    |
| 2525          | 800mg/kg/day | NORMAL         | Pretest phase -5<br>Test period 24    |
| 2528          | 800mg/kg/day | NORMAL         | Pretest phase -5<br>Test period 24,38 |
| 2530          | 800mg/kg/day | NORMAL         | Pretest phase -5<br>Test period 24,38 |

CONFIDENTIAL

Appendix 5  
Individual Animal Ophthalmoscopic Observations

Fexinidazole

Study Number: 0505-2007

F e m a l e

| Animal Number | Dose         | Clinical Signs                        | Study Day(s) Noted                    |
|---------------|--------------|---------------------------------------|---------------------------------------|
| 2560          | Vehicle      | NORMAL                                | Pretest phase -6<br>Test period 24    |
| 2568          | Vehicle      | NORMAL                                | Pretest phase -6<br>Test period 24    |
| 2572          | Vehicle      | NORMAL                                | Pretest phase -6<br>Test period 24    |
| 2575          | Vehicle      | NORMAL<br>opacity area/s, monolateral | Pretest phase -6<br>Test period 24,37 |
| 2577          | Vehicle      | NORMAL                                | Pretest phase -6<br>Test period 24,37 |
| 2562          | 50mg/kg/day  | NORMAL                                | Pretest phase -6<br>Test period 24    |
| 2563          | 50mg/kg/day  | NORMAL                                | Pretest phase -6<br>Test period 24    |
| 2576          | 50mg/kg/day  | NORMAL                                | Pretest phase -6<br>Test period 24    |
| 2561          | 200mg/kg/day | NORMAL                                | Pretest phase -6<br>Test period 24    |
| 2570          | 200mg/kg/day | NORMAL                                | Pretest phase -6<br>Test period 24    |
| 2567          | 200mg/kg/day | NORMAL                                | Pretest phase -6<br>Test period 24    |

CONFIDENTIAL

Appendix 5  
Individual Animal Ophthalmoscopic Observations

Fexinidazole

Study Number: 0505-2007

F e m a l e

| Animal Number | Dose         | Clinical Signs | Study Day(s) Noted                    |
|---------------|--------------|----------------|---------------------------------------|
| 2564          | 800mg/kg/day | NORMAL         | Pretest phase -6<br>Test period 24    |
| 2565          | 800mg/kg/day | NORMAL         | Pretest phase -6<br>Test period 24    |
| 2569          | 800mg/kg/day | NORMAL         | Pretest phase -6<br>Test period 24    |
| 2571          | 800mg/kg/day | NORMAL         | Pretest phase -6<br>Test period 24,37 |
| 2573          | 800mg/kg/day | NORMAL         | Pretest phase -6<br>Test period 24,37 |

## ***Appendix 6 Hematology***

CONFIDENTIAL

Appendix 6  
Day -7 Hematology Data  
Pretest phase

Session 1 (Scheduled)  
Fexinidazole

Study Number: 0505-2007

| M a l e s     |               |                 |           |                          |          |       |        |        |           |       |          |
|---------------|---------------|-----------------|-----------|--------------------------|----------|-------|--------|--------|-----------|-------|----------|
| Dose Level    | Animal Number | Group/ Subgroup | Study Day | RBC 10 <sup>6</sup> /mcL | HGB g/dL | HCT % | MCV fL | MCH pg | MCHC g/dL | RDW % | HDW g/dL |
| Vehicle       |               |                 |           |                          |          |       |        |        |           |       |          |
|               | 2516          | 1/1             | -7        | 6.94                     | 15.7     | 45.1  | 65.0   | 22.6   | 34.7      | 12.8  | 1.58     |
|               | 2518          | 1/1             | -7        | 6.55                     | 15.5     | 43.4  | 66.2   | 23.6   | 35.7      | 13.1  | 1.54     |
|               | 2520          | 1/1             | -7        | 6.38                     | 14.0     | 40.3  | 63.2   | 21.9   | 34.7      | 13.0  | 1.60     |
|               | 2527          | 1/1             | -7        | 6.79                     | 15.5     | 43.9  | 64.6   | 22.8   | 35.3      | 14.1  | 1.67     |
|               | 2533          | 1/1             | -7        | 6.07                     | 14.0     | 39.4  | 64.9   | 23.0   | 35.4      | 12.9  | 1.58     |
|               |               |                 | N         | 5                        | 5        | 5     | 5      | 5      | 5         | 5     | 5        |
|               |               |                 | Mean      | 6.55                     | 14.9     | 42.4  | 64.8   | 22.8   | 35.2      | 13.2  | 1.59     |
|               |               |                 | Sdev      | 0.342                    | 0.86     | 2.45  | 1.07   | 0.62   | 0.44      | 0.53  | 0.048    |
| 50 mg/kg/day  |               |                 |           |                          |          |       |        |        |           |       |          |
|               | 2514          | 2/1             | -7        | 6.51                     | 15.1     | 42.9  | 65.9   | 23.1   | 35.1      | 13.0  | 1.69     |
|               | 2521          | 2/1             | -7        | 7.41                     | 17.3     | 48.8  | 65.8   | 23.3   | 35.4      | 13.4  | 1.66     |
|               | 2529          | 2/1             | -7        | 7.33                     | 16.1     | 46.4  | 63.4   | 22.0   | 34.7      | 13.0  | 1.61     |
|               |               |                 | N         | 3                        | 3        | 3     | 3      | 3      | 3         | 3     | 3        |
|               |               |                 | Mean      | 7.08                     | 16.2     | 46.0  | 65.0   | 22.8   | 35.1      | 13.1  | 1.65     |
|               |               |                 | Sdev      | 0.498                    | 1.10     | 2.97  | 1.42   | 0.70   | 0.35      | 0.23  | 0.040    |
| 200 mg/kg/day |               |                 |           |                          |          |       |        |        |           |       |          |
|               | 2515          | 3/1             | -7        | 7.30                     | 16.4     | 47.0  | 64.4   | 22.5   | 34.9      | 13.2  | 1.68     |
|               | 2523          | 3/1             | -7        | 6.01                     | 13.8     | 39.3  | 65.3   | 22.9   | 35.1      | 12.8  | 1.59     |
|               | 2526          | 3/1             | -7        | 6.91                     | 15.7     | 45.1  | 65.3   | 22.7   | 34.8      | 13.3  | 1.51     |
|               |               |                 | N         | 3                        | 3        | 3     | 3      | 3      | 3         | 3     | 3        |
|               |               |                 | Mean      | 6.74                     | 15.3     | 43.8  | 65.0   | 22.7   | 34.9      | 13.1  | 1.59     |
|               |               |                 | Sdev      | 0.662                    | 1.35     | 4.01  | 0.52   | 0.20   | 0.15      | 0.26  | 0.085    |
| 800 mg/kg/day |               |                 |           |                          |          |       |        |        |           |       |          |
|               | 2517          | 4/1             | -7        | 6.32                     | 14.6     | 41.0  | 64.9   | 23.0   | 35.5      | 13.2  | 1.74     |
|               | 2519          | 4/1             | -7        | 6.96                     | 15.8     | 45.1  | 64.8   | 22.8   | 35.2      | 12.7  | 1.52     |
|               | 2525          | 4/1             | -7        | 7.06                     | 16.1     | 46.1  | 65.4   | 22.9   | 35.0      | 13.0  | 1.66     |
|               | 2528          | 4/1             | -7        | 6.65                     | 14.9     | 42.8  | 64.4   | 22.4   | 34.7      | 13.4  | 1.55     |
|               | 2530          | 4/1             | -7        | 5.88                     | 13.7     | 39.2  | 66.7   | 23.4   | 35.0      | 13.0  | 1.63     |
|               |               |                 | N         | 5                        | 5        | 5     | 5      | 5      | 5         | 5     | 5        |
|               |               |                 | Mean      | 6.57                     | 15.0     | 42.8  | 65.2   | 22.9   | 35.1      | 13.1  | 1.62     |
|               |               |                 | Sdev      | 0.484                    | 0.96     | 2.84  | 0.89   | 0.36   | 0.29      | 0.26  | 0.088    |

RBC - RED BLOOD CELLS  
MCV - MEAN CORPUSCULAR VOLUME  
RDW - RED CELL DISTRIBUTION WIDTH

HGB - HEMOGLOBIN  
MCH - MEAN CORPUSCULAR HEMOGLOBIN  
HDW - HEMOGLOBIN DISTRIB. WIDTH

HCT - HEMATOCRIT  
MCHC - MEAN CORPUSCULAR HGB CONC.

CONFIDENTIAL

Appendix 6  
Day -7 Hematology Data  
Pretest phase

Session 1 (Scheduled)  
Fexinidazole

Study Number: 0505-2007

| M a l e s     |               |                 |           |      |                        |         |           |        |                          |        |       |
|---------------|---------------|-----------------|-----------|------|------------------------|---------|-----------|--------|--------------------------|--------|-------|
| Dose Level    | Animal Number | Group/ Subgroup | Study Day | R %  | RAB 10 <sup>9</sup> /L | MCVr fL | CHCM g/dL | CHr pg | PLT 10 <sup>3</sup> /mcL | MPV fL | PDW % |
| Vehicle       |               |                 |           |      |                        |         |           |        |                          |        |       |
|               | 2516          | 1/1             | -7        | 1.1  | 74.2                   | 86.3    | 30.0      | 25.7   | 213.                     | 12.0   | 61.1  |
|               | 2518          | 1/1             | -7        | 0.6  | 38.5                   | 86.3    | 30.8      | 26.5   | 244.                     | 10.6   | 58.9  |
|               | 2520          | 1/1             | -7        | 0.9  | 54.6                   | 84.8    | 30.3      | 25.6   | 450.                     | 10.9   | 65.4  |
|               | 2527          | 1/1             | -7        | 0.7  | 48.5                   | 88.3    | 29.7      | 26.2   | 387.                     | 12.0   | 63.8  |
|               | 2533          | 1/1             | -7        | 0.4  | 25.2                   | 81.4    | 31.7      | 25.6   | 366.                     | 9.9    | 63.0  |
|               |               |                 | N         | 5    | 5                      | 5       | 5         | 5      | 5                        | 5      | 5     |
|               |               |                 | Mean      | 0.7  | 48.2                   | 85.4    | 30.5      | 25.9   | 332.                     | 11.1   | 62.4  |
|               |               |                 | Sdev      | 0.27 | 18.30                  | 2.57    | 0.78      | 0.41   | 100.0                    | 0.91   | 2.51  |
| 50 mg/kg/day  |               |                 |           |      |                        |         |           |        |                          |        |       |
|               | 2514          | 2/1             | -7        | 1.3  | 87.8                   | 89.8    | 29.0      | 26.0   | 205.                     | 12.5   | 58.7  |
|               | 2521          | 2/1             | -7        | 0.9  | 68.9                   | 87.6    | 30.9      | 27.0   | 191.                     | 11.7   | 66.5  |
|               | 2529          | 2/1             | -7        | 1.0  | 71.5                   | 84.9    | 30.1      | 25.5   | 290.                     | 11.2   | 65.8  |
|               |               |                 | N         | 3    | 3                      | 3       | 3         | 3      | 3                        | 3      | 3     |
|               |               |                 | Mean      | 1.1  | 76.1                   | 87.4    | 30.0      | 26.2   | 229.                     | 11.8   | 63.7  |
|               |               |                 | Sdev      | 0.21 | 10.24                  | 2.45    | 0.95      | 0.76   | 53.6                     | 0.66   | 4.32  |
| 200 mg/kg/day |               |                 |           |      |                        |         |           |        |                          |        |       |
|               | 2515          | 3/1             | -7        | 0.9  | 64.0                   | 87.2    | 29.7      | 25.8   | 246.                     | 12.7   | 62.5  |
|               | 2523          | 3/1             | -7        | 0.6  | 34.9                   | 82.2    | 30.8      | 25.2   | 414.                     | 9.1    | 55.1  |
|               | 2526          | 3/1             | -7        | 0.6  | 39.7                   | 88.5    | 30.6      | 27.0   | 307.                     | 12.3   | 64.4  |
|               |               |                 | N         | 3    | 3                      | 3       | 3         | 3      | 3                        | 3      | 3     |
|               |               |                 | Mean      | 0.7  | 46.2                   | 86.0    | 30.4      | 26.0   | 322.                     | 11.4   | 60.7  |
|               |               |                 | Sdev      | 0.17 | 15.60                  | 3.33    | 0.59      | 0.92   | 85.0                     | 1.97   | 4.91  |
| 800 mg/kg/day |               |                 |           |      |                        |         |           |        |                          |        |       |
|               | 2517          | 4/1             | -7        | 0.9  | 56.2                   | 84.4    | 30.7      | 25.9   | 409.                     | 9.5    | 58.2  |
|               | 2519          | 4/1             | -7        | 0.5  | 36.3                   | 82.5    | 30.8      | 25.4   | 212.                     | 10.9   | 66.1  |
|               | 2525          | 4/1             | -7        | 0.9  | 66.0                   | 87.6    | 30.6      | 26.7   | 239.                     | 13.3   | 65.0  |
|               | 2528          | 4/1             | -7        | 0.6  | 36.6                   | 88.8    | 30.2      | 26.7   | 260.                     | 9.5    | 63.4  |
|               | 2530          | 4/1             | -7        | 0.3  | 16.2                   | 83.7    | 31.9      | 26.4   | 379.                     | 11.8   | 60.6  |
|               |               |                 | N         | 5    | 5                      | 5       | 5         | 5      | 5                        | 5      | 5     |
|               |               |                 | Mean      | 0.6  | 42.3                   | 85.4    | 30.8      | 26.2   | 300.                     | 11.0   | 62.7  |
|               |               |                 | Sdev      | 0.26 | 19.39                  | 2.68    | 0.63      | 0.56   | 88.3                     | 1.62   | 3.24  |

R - RETICULOCYTES  
CHCM - MEAN HEMOGLOBIN CONC. RETIC.  
MPV - MEAN PLATELET VOLUME

RAB - RETICULOCYTES ABS  
CHr - CELLULAR HEMOGLOBIN RETIC.  
PDW - PLATELET DISTRIBUTION WIDTH

MCVr - MEAN CORPUSCULAR VOL. RETIC.  
PLT - PLATELETS

CONFIDENTIAL

Appendix 6  
Day -7 Hematology Data  
Pretest phase

Session 1 (Scheduled)  
Fexinidazole

Study Number: 0505-2007

| M a l e s     |               |                 |           |       |                          |                          |                           |                          |                          |                          |  |
|---------------|---------------|-----------------|-----------|-------|--------------------------|--------------------------|---------------------------|--------------------------|--------------------------|--------------------------|--|
| Dose Level    | Animal Number | Group/ Subgroup | Study Day | PCT % | WBC 10 <sup>3</sup> /mcL | NAB 10 <sup>3</sup> /mcL | LYAB 10 <sup>3</sup> /mcL | MAB 10 <sup>3</sup> /mcL | EAB 10 <sup>3</sup> /mcL | BAB 10 <sup>3</sup> /mcL |  |
| Vehicle       |               |                 |           |       |                          |                          |                           |                          |                          |                          |  |
|               | 2516          | 1/1             | -7        | 0.26  | 9.51                     | 5.14                     | 3.36                      | 0.36                     | 0.55                     | 0.07                     |  |
|               | 2518          | 1/1             | -7        | 0.26  | 8.84                     | 5.47                     | 2.57                      | 0.43                     | 0.15                     | 0.14                     |  |
|               | 2520          | 1/1             | -7        | 0.49  | 6.92                     | 3.42                     | 2.81                      | 0.35                     | 0.26                     | 0.05                     |  |
|               | 2527          | 1/1             | -7        | 0.47  | 10.14                    | 5.65                     | 3.44                      | 0.61                     | 0.29                     | 0.09                     |  |
|               | 2533          | 1/1             | -7        | 0.36  | 9.22                     | 5.38                     | 3.17                      | 0.42                     | 0.16                     | 0.05                     |  |
|               |               |                 | N         | 5     | 5                        | 5                        | 5                         | 5                        | 5                        | 5                        |  |
|               |               |                 | Mean      | 0.37  | 8.93                     | 5.01                     | 3.07                      | 0.43                     | 0.28                     | 0.08                     |  |
|               |               |                 | Sdev      | 0.110 | 1.218                    | 0.909                    | 0.370                     | 0.105                    | 0.162                    | 0.037                    |  |
| 50 mg/kg/day  |               |                 |           |       |                          |                          |                           |                          |                          |                          |  |
|               | 2514          | 2/1             | -7        | 0.26  | 9.85                     | 5.49                     | 3.44                      | 0.39                     | 0.38                     | 0.11                     |  |
|               | 2521          | 2/1             | -7        | 0.22  | 9.19                     | 5.51                     | 2.64                      | 0.56                     | 0.30                     | 0.13                     |  |
|               | 2529          | 2/1             | -7        | 0.33  | 6.47                     | 3.23                     | 2.58                      | 0.29                     | 0.11                     | 0.19                     |  |
|               |               |                 | N         | 3     | 3                        | 3                        | 3                         | 3                        | 3                        | 3                        |  |
|               |               |                 | Mean      | 0.27  | 8.50                     | 4.74                     | 2.89                      | 0.41                     | 0.26                     | 0.14                     |  |
|               |               |                 | Sdev      | 0.056 | 1.792                    | 1.311                    | 0.480                     | 0.137                    | 0.139                    | 0.042                    |  |
| 200 mg/kg/day |               |                 |           |       |                          |                          |                           |                          |                          |                          |  |
|               | 2515          | 3/1             | -7        | 0.31  | 8.35                     | 5.14                     | 2.62                      | 0.26                     | 0.19                     | 0.10                     |  |
|               | 2523          | 3/1             | -7        | 0.38  | 10.34                    | 6.56                     | 2.72                      | 0.67                     | 0.26                     | 0.10                     |  |
|               | 2526          | 3/1             | -7        | 0.38  | 12.33                    | 7.23                     | 3.72                      | 0.98                     | 0.18                     | 0.14                     |  |
|               |               |                 | N         | 3     | 3                        | 3                        | 3                         | 3                        | 3                        | 3                        |  |
|               |               |                 | Mean      | 0.36  | 10.34                    | 6.31                     | 3.02                      | 0.64                     | 0.21                     | 0.11                     |  |
|               |               |                 | Sdev      | 0.040 | 1.990                    | 1.067                    | 0.608                     | 0.361                    | 0.044                    | 0.023                    |  |
| 800 mg/kg/day |               |                 |           |       |                          |                          |                           |                          |                          |                          |  |
|               | 2517          | 4/1             | -7        | 0.39  | 6.48                     | 3.87                     | 2.07                      | 0.37                     | 0.07                     | 0.07                     |  |
|               | 2519          | 4/1             | -7        | 0.23  | 7.99                     | 4.06                     | 2.64                      | 0.54                     | 0.58                     | 0.14                     |  |
|               | 2525          | 4/1             | -7        | 0.32  | 10.19                    | 6.82                     | 2.75                      | 0.35                     | 0.18                     | 0.08                     |  |
|               | 2528          | 4/1             | -7        | 0.25  | 9.78                     | 5.12                     | 3.54                      | 0.51                     | 0.45                     | 0.11                     |  |
|               | 2530          | 4/1             | -7        | 0.45  | 7.08                     | 3.62                     | 2.83                      | 0.34                     | 0.14                     | 0.08                     |  |
|               |               |                 | N         | 5     | 5                        | 5                        | 5                         | 5                        | 5                        | 5                        |  |
|               |               |                 | Mean      | 0.33  | 8.30                     | 4.70                     | 2.77                      | 0.42                     | 0.28                     | 0.10                     |  |
|               |               |                 | Sdev      | 0.093 | 1.632                    | 1.317                    | 0.525                     | 0.095                    | 0.219                    | 0.029                    |  |

PCT - PLATELET HEMATOCRIT  
LYAB - LYMPHOCYTES ABS  
BAB - BASOPHILS ABS

WBC - WHITE BLOOD CELLS  
MAB - MONOCYTES ABS

NAB - NEUTROPHILS ABS  
EAB - EOSINOPHILS ABS

CONFIDENTIAL

Appendix 6  
Day -7 Hematology Data  
Pretest phase

Session 1 (Scheduled)  
Fexinidazole

Study Number: 0505-2007

| M a l e s     |               |                 |           |                           |      |      |      |      |      |      |
|---------------|---------------|-----------------|-----------|---------------------------|------|------|------|------|------|------|
| Dose Level    | Animal Number | Group/ Subgroup | Study Day | LUAB 10 <sup>3</sup> /mcL | N %  | LY % | M %  | E %  | B %  | LU % |
| Vehicle       |               |                 |           |                           |      |      |      |      |      |      |
|               | 2516          | 1/1             | -7        | 0.03                      | 54.0 | 35.3 | 3.7  | 5.8  | 0.7  | 0.4  |
|               | 2518          | 1/1             | -7        | 0.07                      | 61.9 | 29.1 | 4.9  | 1.7  | 1.6  | 0.8  |
|               | 2520          | 1/1             | -7        | 0.03                      | 49.4 | 40.6 | 5.0  | 3.8  | 0.8  | 0.4  |
|               | 2527          | 1/1             | -7        | 0.04                      | 55.8 | 34.0 | 6.1  | 2.9  | 0.9  | 0.4  |
|               | 2533          | 1/1             | -7        | 0.04                      | 58.4 | 34.3 | 4.6  | 1.8  | 0.6  | 0.4  |
|               |               |                 | N         | 5                         | 5    | 5    | 5    | 5    | 5    | 5    |
|               |               |                 | Mean      | 0.04                      | 55.9 | 34.7 | 4.9  | 3.2  | 0.9  | 0.5  |
|               |               |                 | Sdev      | 0.016                     | 4.69 | 4.10 | 0.86 | 1.69 | 0.40 | 0.18 |
| 50 mg/kg/day  |               |                 |           |                           |      |      |      |      |      |      |
|               | 2514          | 2/1             | -7        | 0.04                      | 55.8 | 35.0 | 4.0  | 3.8  | 1.1  | 0.4  |
|               | 2521          | 2/1             | -7        | 0.06                      | 59.9 | 28.7 | 6.0  | 3.3  | 1.4  | 0.6  |
|               | 2529          | 2/1             | -7        | 0.07                      | 49.9 | 39.8 | 4.5  | 1.7  | 2.9  | 1.1  |
|               |               |                 | N         | 3                         | 3    | 3    | 3    | 3    | 3    | 3    |
|               |               |                 | Mean      | 0.06                      | 55.2 | 34.5 | 4.8  | 2.9  | 1.8  | 0.7  |
|               |               |                 | Sdev      | 0.015                     | 5.03 | 5.57 | 1.04 | 1.10 | 0.96 | 0.36 |
| 200 mg/kg/day |               |                 |           |                           |      |      |      |      |      |      |
|               | 2515          | 3/1             | -7        | 0.05                      | 61.5 | 31.4 | 3.1  | 2.3  | 1.2  | 0.6  |
|               | 2523          | 3/1             | -7        | 0.04                      | 63.4 | 26.3 | 6.4  | 2.5  | 0.9  | 0.4  |
|               | 2526          | 3/1             | -7        | 0.08                      | 58.7 | 30.2 | 7.9  | 1.5  | 1.1  | 0.6  |
|               |               |                 | N         | 3                         | 3    | 3    | 3    | 3    | 3    | 3    |
|               |               |                 | Mean      | 0.06                      | 61.2 | 29.3 | 5.8  | 2.1  | 1.1  | 0.5  |
|               |               |                 | Sdev      | 0.021                     | 2.36 | 2.67 | 2.46 | 0.53 | 0.15 | 0.12 |
| 800 mg/kg/day |               |                 |           |                           |      |      |      |      |      |      |
|               | 2517          | 4/1             | -7        | 0.02                      | 59.8 | 32.0 | 5.7  | 1.1  | 1.1  | 0.4  |
|               | 2519          | 4/1             | -7        | 0.04                      | 50.8 | 33.0 | 6.7  | 7.3  | 1.7  | 0.5  |
|               | 2525          | 4/1             | -7        | 0.02                      | 66.9 | 27.0 | 3.4  | 1.7  | 0.8  | 0.2  |
|               | 2528          | 4/1             | -7        | 0.05                      | 52.4 | 36.2 | 5.2  | 4.6  | 1.1  | 0.5  |
|               | 2530          | 4/1             | -7        | 0.07                      | 51.2 | 40.0 | 4.7  | 2.0  | 1.1  | 0.9  |
|               |               |                 | N         | 5                         | 5    | 5    | 5    | 5    | 5    | 5    |
|               |               |                 | Mean      | 0.04                      | 56.2 | 33.6 | 5.1  | 3.3  | 1.2  | 0.5  |
|               |               |                 | Sdev      | 0.021                     | 7.00 | 4.85 | 1.22 | 2.59 | 0.33 | 0.25 |

LUAB - LARGE UNSTAINED CELLS ABS  
M - MONOCYTES %  
LU - LARGE UNSTAINED CELLS %

N - NEUTROPHILS %  
E - EOSINOPHILS %

LY - LYMPHOCITES %  
B - BASOPHILS %



CONFIDENTIAL

Appendix 6  
Day -7 Hematology Data  
Pretest phase

Session 1 (Scheduled)  
Fexinidazole

Study Number: 0505-2007

| F e m a l e s |               |                 |           |                          |          |       |        |        |           |       |          |
|---------------|---------------|-----------------|-----------|--------------------------|----------|-------|--------|--------|-----------|-------|----------|
| Dose Level    | Animal Number | Group/ Subgroup | Study Day | RBC 10 <sup>6</sup> /mcL | HGB g/dL | HCT % | MCV fL | MCH pg | MCHC g/dL | RDW % | HDW g/dL |
| Vehicle       |               |                 |           |                          |          |       |        |        |           |       |          |
|               | 2560          | 1/1             | -7        | 6.45                     | 14.8     | 43.3  | 67.1   | 22.9   | 34.1      | 11.0  | 1.65     |
|               | 2568          | 1/1             | -7        | 6.54                     | 14.7     | 44.2  | 67.5   | 22.5   | 33.2      | 11.1  | 1.65     |
|               | 2572          | 1/1             | -7        | 6.16                     | 13.9     | 41.4  | 67.1   | 22.6   | 33.7      | 11.9  | 1.72     |
|               | 2575          | 1/1             | -7        | 6.99                     | 16.1     | 47.2  | 67.5   | 23.0   | 34.1      | 10.6  | 1.71     |
|               | 2577          | 1/1             | -7        | 6.57                     | 14.8     | 43.6  | 66.3   | 22.5   | 33.9      | 11.4  | 1.75     |
|               |               |                 | N         | 5                        | 5        | 5     | 5      | 5      | 5         | 5     | 5        |
|               |               |                 | Mean      | 6.54                     | 14.9     | 43.9  | 67.1   | 22.7   | 33.8      | 11.2  | 1.70     |
|               |               |                 | Sdev      | 0.298                    | 0.79     | 2.10  | 0.49   | 0.23   | 0.37      | 0.48  | 0.044    |
| 50 mg/kg/day  |               |                 |           |                          |          |       |        |        |           |       |          |
|               | 2562          | 2/1             | -7        | 7.94                     | 18.2     | 53.1  | 66.9   | 22.9   | 34.3      | 11.7  | 1.73     |
|               | 2563          | 2/1             | -7        | 7.13                     | 16.6     | 48.9  | 68.6   | 23.3   | 34.0      | 11.5  | 1.69     |
|               | 2576          | 2/1             | -7        | 7.30                     | 16.9     | 49.6  | 68.0   | 23.1   | 34.0      | 11.0  | 1.70     |
|               |               |                 | N         | 3                        | 3        | 3     | 3      | 3      | 3         | 3     | 3        |
|               |               |                 | Mean      | 7.46                     | 17.2     | 50.5  | 67.8   | 23.1   | 34.1      | 11.4  | 1.71     |
|               |               |                 | Sdev      | 0.427                    | 0.85     | 2.25  | 0.86   | 0.20   | 0.17      | 0.36  | 0.021    |
| 200 mg/kg/day |               |                 |           |                          |          |       |        |        |           |       |          |
|               | 2561          | 3/1             | -7        | 6.96                     | 16.0     | 47.1  | 67.7   | 23.0   | 34.0      | 11.6  | 1.63     |
|               | 2570          | 3/1             | -7        | 6.67                     | 14.7     | 43.8  | 65.8   | 22.0   | 33.5      | 11.4  | 1.72     |
|               | 2567          | 3/1             | -7        | 6.69                     | 15.4     | 44.8  | 67.0   | 22.9   | 34.3      | 11.3  | 1.65     |
|               |               |                 | N         | 3                        | 3        | 3     | 3      | 3      | 3         | 3     | 3        |
|               |               |                 | Mean      | 6.77                     | 15.4     | 45.2  | 66.8   | 22.6   | 33.9      | 11.4  | 1.67     |
|               |               |                 | Sdev      | 0.162                    | 0.65     | 1.69  | 0.96   | 0.55   | 0.40      | 0.15  | 0.047    |
| 800 mg/kg/day |               |                 |           |                          |          |       |        |        |           |       |          |
|               | 2564          | 4/1             | -7        | 6.45                     | 15.0     | 44.1  | 68.4   | 23.3   | 34.0      | 10.7  | 1.63     |
|               | 2565          | 4/1             | -7        | 7.13                     | 16.6     | 49.1  | 68.9   | 23.2   | 33.7      | 11.5  | 1.67     |
|               | 2569          | 4/1             | -7        | 7.20                     | 15.9     | 47.8  | 66.3   | 22.1   | 33.3      | 11.0  | 1.73     |
|               | 2571          | 4/1             | -7        | 6.97                     | 15.4     | 46.0  | 66.0   | 22.0   | 33.4      | 11.3  | 1.71     |
|               | 2573          | 4/1             | -7        | 6.32                     | 14.8     | 43.3  | 68.5   | 23.3   | 34.1      | 11.3  | 1.65     |
|               |               |                 | N         | 5                        | 5        | 5     | 5      | 5      | 5         | 5     | 5        |
|               |               |                 | Mean      | 6.81                     | 15.5     | 46.1  | 67.6   | 22.8   | 33.7      | 11.2  | 1.68     |
|               |               |                 | Sdev      | 0.403                    | 0.73     | 2.44  | 1.36   | 0.67   | 0.35      | 0.31  | 0.041    |

RBC - RED BLOOD CELLS  
MCV - MEAN CORPUSCULAR VOLUME  
RDW - RED CELL DISTRIBUTION WIDTH

HGB - HEMOGLOBIN  
MCH - MEAN CORPUSCULAR HEMOGLOBIN  
HDW - HEMOGLOBIN DISTRIB. WIDTH

HCT - HEMATOCRIT  
MCHC - MEAN CORPUSCULAR HGB CONC.

CONFIDENTIAL

Appendix 6  
Day -7 Hematology Data  
Pretest phase

Session 1 (Scheduled)  
Fexinidazole

Study Number: 0505-2007

| F e m a l e s |               |                 |           |      |                        |         |           |        |                          |        |       |
|---------------|---------------|-----------------|-----------|------|------------------------|---------|-----------|--------|--------------------------|--------|-------|
| Dose Level    | Animal Number | Group/ Subgroup | Study Day | R %  | RAB 10 <sup>9</sup> /L | MCVr fL | CHCM g/dL | CHr pg | PLT 10 <sup>3</sup> /mcL | MPV fL | PDW % |
| Vehicle       |               |                 |           |      |                        |         |           |        |                          |        |       |
|               | 2560          | 1/1             | -7        | 0.6  | 39.1                   | 84.1    | 29.0      | 24.2   | 317.                     | 11.4   | 66.5  |
|               | 2568          | 1/1             | -7        | 0.5  | 30.1                   | 87.6    | 28.5      | 24.8   | 301.                     | 8.6    | 49.6  |
|               | 2572          | 1/1             | -7        | 0.6  | 34.9                   | 86.7    | 28.2      | 24.3   | 467.                     | 9.3    | 55.7  |
|               | 2575          | 1/1             | -7        | 0.4  | 28.5                   | 85.0    | 29.7      | 25.1   | 368.                     | 8.8    | 52.0  |
|               | 2577          | 1/1             | -7        | 0.3  | 19.1                   | 84.9    | 29.4      | 24.8   | 250.                     | 9.2    | 59.1  |
|               |               |                 | N         | 5    | 5                      | 5       | 5         | 5      | 5                        | 5      | 5     |
|               |               |                 | Mean      | 0.5  | 30.3                   | 85.7    | 29.0      | 24.6   | 341.                     | 9.5    | 56.6  |
|               |               |                 | Sdev      | 0.13 | 7.54                   | 1.44    | 0.62      | 0.38   | 82.3                     | 1.12   | 6.62  |
| 50 mg/kg/day  |               |                 |           |      |                        |         |           |        |                          |        |       |
|               | 2562          | 2/1             | -7        | 1.0  | 76.6                   | 87.2    | 28.8      | 25.0   | 261.                     | 10.0   | 58.2  |
|               | 2563          | 2/1             | -7        | 1.0  | 69.3                   | 92.0    | 27.6      | 25.3   | 279.                     | 12.1   | 61.7  |
|               | 2576          | 2/1             | -7        | 0.5  | 38.5                   | 84.8    | 29.2      | 24.6   | 424.                     | 9.3    | 59.0  |
|               |               |                 | N         | 3    | 3                      | 3       | 3         | 3      | 3                        | 3      | 3     |
|               |               |                 | Mean      | 0.8  | 61.5                   | 88.0    | 28.5      | 25.0   | 321.                     | 10.5   | 59.6  |
|               |               |                 | Sdev      | 0.25 | 20.22                  | 3.67    | 0.83      | 0.35   | 89.4                     | 1.46   | 1.83  |
| 200 mg/kg/day |               |                 |           |      |                        |         |           |        |                          |        |       |
|               | 2561          | 3/1             | -7        | 0.5  | 34.1                   | 85.2    | 28.6      | 24.3   | 365.                     | 10.5   | 58.6  |
|               | 2570          | 3/1             | -7        | 0.6  | 42.5                   | 81.8    | 29.0      | 23.6   | 407.                     | 8.7    | 54.8  |
|               | 2567          | 3/1             | -7        | 0.4  | 24.5                   | 87.5    | 28.5      | 24.9   | 271.                     | 8.9    | 57.2  |
|               |               |                 | N         | 3    | 3                      | 3       | 3         | 3      | 3                        | 3      | 3     |
|               |               |                 | Mean      | 0.5  | 33.7                   | 84.8    | 28.7      | 24.3   | 348.                     | 9.4    | 56.9  |
|               |               |                 | Sdev      | 0.14 | 9.01                   | 2.87    | 0.26      | 0.65   | 69.6                     | 0.99   | 1.92  |
| 800 mg/kg/day |               |                 |           |      |                        |         |           |        |                          |        |       |
|               | 2564          | 4/1             | -7        | 0.3  | 18.2                   | 87.0    | 29.2      | 25.1   | 287.                     | 9.5    | 52.9  |
|               | 2565          | 4/1             | -7        | 0.7  | 50.5                   | 90.2    | 28.3      | 25.4   | 281.                     | 10.0   | 52.8  |
|               | 2569          | 4/1             | -7        | 0.7  | 47.8                   | 82.1    | 29.0      | 23.6   | 324.                     | 9.0    | 50.8  |
|               | 2571          | 4/1             | -7        | 0.7  | 47.7                   | 84.1    | 28.7      | 24.0   | 324.                     | 9.3    | 54.3  |
|               | 2573          | 4/1             | -7        | 0.3  | 21.5                   | 83.0    | 30.2      | 24.6   | 254.                     | 10.3   | 60.7  |
|               |               |                 | N         | 5    | 5                      | 5       | 5         | 5      | 5                        | 5      | 5     |
|               |               |                 | Mean      | 0.5  | 37.1                   | 85.3    | 29.1      | 24.5   | 294.                     | 9.6    | 54.3  |
|               |               |                 | Sdev      | 0.21 | 15.87                  | 3.31    | 0.71      | 0.75   | 30.1                     | 0.53   | 3.79  |

R - RETICULOCYTES  
CHCM - MEAN HEMOGLOBIN CONC. RETIC.  
MPV - MEAN PLATELET VOLUME

RAB - RETICULOCYTES ABS  
CHr - CELLULAR HEMOGLOBIN RETIC.  
PDW - PLATELET DISTRIBUTION WIDTH

MCVr - MEAN CORPUSCULAR VOL. RETIC.  
PLT - PLATELETS

CONFIDENTIAL

Appendix 6  
Day -7 Hematology Data  
Pretest phase

Session 1 (Scheduled)  
Fexinidazole

Study Number: 0505-2007

F e m a l e s

| Dose Level    | Animal Number | Group/ Subgroup | Study Day | PCT % | WBC 10 <sup>3</sup> /mcL | NAB 10 <sup>3</sup> /mcL | LYAB 10 <sup>3</sup> /mcL | MAB 10 <sup>3</sup> /mcL | EAB 10 <sup>3</sup> /mcL | BAB 10 <sup>3</sup> /mcL |
|---------------|---------------|-----------------|-----------|-------|--------------------------|--------------------------|---------------------------|--------------------------|--------------------------|--------------------------|
| Vehicle       |               |                 |           |       |                          |                          |                           |                          |                          |                          |
|               | 2560          | 1/1             | -7        | 0.36  | 12.60                    | 7.58                     | 4.01                      | 0.70                     | 0.09                     | 0.15                     |
|               | 2568          | 1/1             | -7        | 0.26  | 10.13                    | 5.71                     | 3.64                      | 0.42                     | 0.21                     | 0.09                     |
|               | 2572          | 1/1             | -7        | 0.44  | 9.83                     | 6.50                     | 2.53                      | 0.38                     | 0.18                     | 0.16                     |
|               | 2575          | 1/1             | -7        | 0.32  | 11.65                    | 6.30                     | 4.07                      | 0.62                     | 0.43                     | 0.17                     |
|               | 2577          | 1/1             | -7        | 0.23  | 8.31                     | 4.50                     | 3.08                      | 0.39                     | 0.14                     | 0.14                     |
|               |               |                 | N         | 5     | 5                        | 5                        | 5                         | 5                        | 5                        | 5                        |
|               |               |                 | Mean      | 0.32  | 10.50                    | 6.12                     | 3.47                      | 0.50                     | 0.21                     | 0.14                     |
|               |               |                 | Sdev      | 0.083 | 1.667                    | 1.129                    | 0.655                     | 0.148                    | 0.131                    | 0.031                    |
| 50 mg/kg/day  |               |                 |           |       |                          |                          |                           |                          |                          |                          |
|               | 2562          | 2/1             | -7        | 0.26  | 12.29                    | 7.89                     | 3.26                      | 0.64                     | 0.29                     | 0.16                     |
|               | 2563          | 2/1             | -7        | 0.34  | 10.02                    | 5.71                     | 3.15                      | 0.57                     | 0.42                     | 0.12                     |
|               | 2576          | 2/1             | -7        | 0.39  | 10.15                    | 6.00                     | 2.96                      | 0.39                     | 0.57                     | 0.18                     |
|               |               |                 | N         | 3     | 3                        | 3                        | 3                         | 3                        | 3                        | 3                        |
|               |               |                 | Mean      | 0.33  | 10.82                    | 6.53                     | 3.12                      | 0.53                     | 0.43                     | 0.15                     |
|               |               |                 | Sdev      | 0.066 | 1.275                    | 1.184                    | 0.152                     | 0.129                    | 0.140                    | 0.031                    |
| 200 mg/kg/day |               |                 |           |       |                          |                          |                           |                          |                          |                          |
|               | 2561          | 3/1             | -7        | 0.38  | 9.18                     | 4.50                     | 3.81                      | 0.37                     | 0.15                     | 0.25                     |
|               | 2570          | 3/1             | -7        | 0.35  | 10.82                    | 7.91                     | 2.07                      | 0.51                     | 0.22                     | 0.08                     |
|               | 2567          | 3/1             | -7        | 0.24  | 8.75                     | 4.31                     | 2.89                      | 0.38                     | 1.02                     | 0.11                     |
|               |               |                 | N         | 3     | 3                        | 3                        | 3                         | 3                        | 3                        | 3                        |
|               |               |                 | Mean      | 0.32  | 9.58                     | 5.57                     | 2.92                      | 0.42                     | 0.46                     | 0.15                     |
|               |               |                 | Sdev      | 0.074 | 1.092                    | 2.026                    | 0.870                     | 0.078                    | 0.483                    | 0.091                    |
| 800 mg/kg/day |               |                 |           |       |                          |                          |                           |                          |                          |                          |
|               | 2564          | 4/1             | -7        | 0.27  | 7.83                     | 3.77                     | 2.90                      | 0.48                     | 0.50                     | 0.12                     |
|               | 2565          | 4/1             | -7        | 0.28  | 8.55                     | 4.81                     | 2.36                      | 0.30                     | 0.97                     | 0.07                     |
|               | 2569          | 4/1             | -7        | 0.29  | 8.65                     | 5.12                     | 2.88                      | 0.30                     | 0.19                     | 0.12                     |
|               | 2571          | 4/1             | -7        | 0.30  | 7.70                     | 4.44                     | 2.65                      | 0.26                     | 0.23                     | 0.10                     |
|               | 2573          | 4/1             | -7        | 0.26  | 7.61                     | 4.80                     | 2.37                      | 0.21                     | 0.08                     | 0.11                     |
|               |               |                 | N         | 5     | 5                        | 5                        | 5                         | 5                        | 5                        | 5                        |
|               |               |                 | Mean      | 0.28  | 8.07                     | 4.59                     | 2.63                      | 0.31                     | 0.39                     | 0.10                     |
|               |               |                 | Sdev      | 0.016 | 0.493                    | 0.517                    | 0.263                     | 0.102                    | 0.357                    | 0.021                    |

PCT - PLATELET HEMATOCRIT  
LYAB - LYMPHOCYTES ABS  
BAB - BASOPHILS ABS

WBC - WHITE BLOOD CELLS  
MAB - MONOCYTES ABS

NAB - NEUTROPHILS ABS  
EAB - EOSINOPHILS ABS

CONFIDENTIAL

Appendix 6  
Day -7 Hematology Data  
Pretest phase

Session 1 (Scheduled)  
Fexinidazole

Study Number: 0505-2007

| F e m a l e s |               |                 |           |                           |       |       |      |      |      |      |
|---------------|---------------|-----------------|-----------|---------------------------|-------|-------|------|------|------|------|
| Dose Level    | Animal Number | Group/ Subgroup | Study Day | LUAB 10 <sup>3</sup> /mcL | N %   | LY %  | M %  | E %  | B %  | LU % |
| Vehicle       |               |                 |           |                           |       |       |      |      |      |      |
|               | 2560          | 1/1             | -7        | 0.06                      | 60.2  | 31.9  | 5.5  | 0.8  | 1.2  | 0.5  |
|               | 2568          | 1/1             | -7        | 0.05                      | 56.4  | 36.0  | 4.2  | 2.1  | 0.9  | 0.5  |
|               | 2572          | 1/1             | -7        | 0.08                      | 66.2  | 25.7  | 3.8  | 1.8  | 1.6  | 0.8  |
|               | 2575          | 1/1             | -7        | 0.07                      | 54.1  | 34.9  | 5.3  | 3.7  | 1.4  | 0.6  |
|               | 2577          | 1/1             | -7        | 0.07                      | 54.1  | 37.1  | 4.6  | 1.7  | 1.7  | 0.8  |
|               |               |                 | N         | 5                         | 5     | 5     | 5    | 5    | 5    | 5    |
|               |               |                 | Mean      | 0.07                      | 58.2  | 33.1  | 4.7  | 2.0  | 1.4  | 0.6  |
|               |               |                 | Sdev      | 0.011                     | 5.12  | 4.58  | 0.72 | 1.06 | 0.32 | 0.15 |
| 50 mg/kg/day  |               |                 |           |                           |       |       |      |      |      |      |
|               | 2562          | 2/1             | -7        | 0.05                      | 64.2  | 26.6  | 5.2  | 2.3  | 1.3  | 0.4  |
|               | 2563          | 2/1             | -7        | 0.04                      | 57.0  | 31.5  | 5.7  | 4.2  | 1.2  | 0.4  |
|               | 2576          | 2/1             | -7        | 0.06                      | 59.1  | 29.2  | 3.8  | 5.6  | 1.7  | 0.6  |
|               |               |                 | N         | 3                         | 3     | 3     | 3    | 3    | 3    | 3    |
|               |               |                 | Mean      | 0.05                      | 60.1  | 29.1  | 4.9  | 4.0  | 1.4  | 0.5  |
|               |               |                 | Sdev      | 0.010                     | 3.70  | 2.45  | 0.98 | 1.66 | 0.26 | 0.12 |
| 200 mg/kg/day |               |                 |           |                           |       |       |      |      |      |      |
|               | 2561          | 3/1             | -7        | 0.10                      | 49.0  | 41.5  | 4.0  | 1.6  | 2.7  | 1.1  |
|               | 2570          | 3/1             | -7        | 0.03                      | 73.2  | 19.1  | 4.7  | 2.0  | 0.8  | 0.3  |
|               | 2567          | 3/1             | -7        | 0.03                      | 49.3  | 33.0  | 4.4  | 11.7 | 1.3  | 0.3  |
|               |               |                 | N         | 3                         | 3     | 3     | 3    | 3    | 3    | 3    |
|               |               |                 | Mean      | 0.05                      | 57.2  | 31.2  | 4.4  | 5.1  | 1.6  | 0.6  |
|               |               |                 | Sdev      | 0.040                     | 13.89 | 11.31 | 0.35 | 5.72 | 0.98 | 0.46 |
| 800 mg/kg/day |               |                 |           |                           |       |       |      |      |      |      |
|               | 2564          | 4/1             | -7        | 0.05                      | 48.2  | 37.0  | 6.1  | 6.4  | 1.6  | 0.7  |
|               | 2565          | 4/1             | -7        | 0.03                      | 56.3  | 27.6  | 3.5  | 11.3 | 0.8  | 0.4  |
|               | 2569          | 4/1             | -7        | 0.05                      | 59.2  | 33.3  | 3.4  | 2.1  | 1.4  | 0.6  |
|               | 2571          | 4/1             | -7        | 0.02                      | 57.7  | 34.4  | 3.3  | 3.0  | 1.3  | 0.3  |
|               | 2573          | 4/1             | -7        | 0.04                      | 63.0  | 31.1  | 2.8  | 1.1  | 1.4  | 0.6  |
|               |               |                 | N         | 5                         | 5     | 5     | 5    | 5    | 5    | 5    |
|               |               |                 | Mean      | 0.04                      | 56.9  | 32.7  | 3.8  | 4.8  | 1.3  | 0.5  |
|               |               |                 | Sdev      | 0.013                     | 5.46  | 3.55  | 1.30 | 4.15 | 0.30 | 0.16 |

LUAB - LARGE UNSTAINED CELLS ABS  
M - MONOCYTES %  
LU - LARGE UNSTAINED CELLS %

N - NEUTROPHILS %  
E - EOSINOPHILS %

LY - LYMPHOCITES %  
B - BASOPHILS %

CONFIDENTIAL

Appendix 6  
Day 28 Hematology Data  
Test period

Session 1 (Scheduled)  
Fexinidazole

Study Number: 0505-2007

| M a l e s     |               |                 |           |                          |          |       |        |        |           |       |          |
|---------------|---------------|-----------------|-----------|--------------------------|----------|-------|--------|--------|-----------|-------|----------|
| Dose Level    | Animal Number | Group/ Subgroup | Study Day | RBC 10 <sup>6</sup> /mcL | HGB g/dL | HCT % | MCV fL | MCH pg | MCHC g/dL | RDW % | HDW g/dL |
| Vehicle       |               |                 |           |                          |          |       |        |        |           |       |          |
|               | 2516          | 1/1             | 28        | 6.46                     | 14.1     | 43.0  | 66.6   | 21.9   | 32.9      | 12.1  | 1.76     |
|               | 2518          | 1/1             | 28        | 6.11                     | 13.8     | 41.1  | 67.2   | 22.6   | 33.6      | 12.5  | 1.91     |
|               | 2520          | 1/1             | 28        | 6.62                     | 13.9     | 42.4  | 64.0   | 21.0   | 32.9      | 11.9  | 1.80     |
|               | 2527          | 1/1             | 28        | 5.77                     | 12.8     | 37.9  | 65.7   | 22.3   | 33.9      | 12.4  | 1.75     |
|               | 2533          | 1/1             | 28        | 5.50                     | 12.0     | 36.1  | 65.6   | 21.7   | 33.1      | 12.3  | 1.81     |
|               |               |                 | N         | 5                        | 5        | 5     | 5      | 5      | 5         | 5     | 5        |
|               |               |                 | Mean      | 6.09                     | 13.3     | 40.1  | 65.8   | 21.9   | 33.3      | 12.2  | 1.81     |
|               |               |                 | Sdev      | 0.466                    | 0.89     | 2.98  | 1.21   | 0.61   | 0.45      | 0.24  | 0.063    |
| 50 mg/kg/day  |               |                 |           |                          |          |       |        |        |           |       |          |
|               | 2514          | 2/1             | 28        | 7.00                     | 15.1     | 46.5  | 66.4   | 21.6   | 32.5      | 12.0  | 1.82     |
|               | 2521          | 2/1             | 28        | 7.63                     | 17.0     | 50.7  | 66.4   | 22.3   | 33.5      | 11.8  | 1.75     |
|               | 2529          | 2/1             | 28        | 6.66                     | 14.5     | 42.6  | 64.0   | 21.8   | 34.1      | 11.0  | 1.67     |
|               |               |                 | N         | 3                        | 3        | 3     | 3      | 3      | 3         | 3     | 3        |
|               |               |                 | Mean      | 7.10                     | 15.5     | 46.6  | 65.6   | 21.9   | 33.4      | 11.6  | 1.75     |
|               |               |                 | Sdev      | 0.492                    | 1.31     | 4.05  | 1.39   | 0.36   | 0.81      | 0.53  | 0.075    |
| 200 mg/kg/day |               |                 |           |                          |          |       |        |        |           |       |          |
|               | 2515          | 3/1             | 28        | 6.81                     | 14.6     | 44.4  | 65.3   | 21.5   | 33.0      | 12.0  | 1.80     |
|               | 2523          | 3/1             | 28        | 5.39                     | 11.6     | 35.4  | 65.6   | 21.6   | 32.9      | 11.6  | 1.86     |
|               | 2526          | 3/1             | 28        | 6.27                     | 14.0     | 41.8  | 66.6   | 22.4   | 33.5      | 12.4  | 1.75     |
|               |               |                 | N         | 3                        | 3        | 3     | 3      | 3      | 3         | 3     | 3        |
|               |               |                 | Mean      | 6.16                     | 13.4     | 40.5  | 65.8   | 21.8   | 33.1      | 12.0  | 1.80     |
|               |               |                 | Sdev      | 0.717                    | 1.59     | 4.63  | 0.68   | 0.49   | 0.32      | 0.40  | 0.055    |
| 800 mg/kg/day |               |                 |           |                          |          |       |        |        |           |       |          |
|               | 2517          | 4/1             | 28        | 5.72                     | 12.6     | 37.2  | 65.1   | 22.0   | 33.7      | 11.4  | 1.82     |
|               | 2519          | 4/1             | 28        | 6.41                     | 14.0     | 41.1  | 64.1   | 21.8   | 34.1      | 11.5  | 1.76     |
|               | 2525          | 4/1             | 28        | 6.64                     | 14.7     | 43.7  | 65.8   | 22.2   | 33.8      | 12.3  | 1.83     |
|               | 2528          | 4/1             | 28        | 5.95                     | 13.0     | 39.4  | 66.2   | 21.9   | 33.1      | 12.0  | 1.74     |
|               | 2530          | 4/1             | 28        | 5.59                     | 12.3     | 37.3  | 66.6   | 22.0   | 33.0      | 12.1  | 1.92     |
|               |               |                 | N         | 5                        | 5        | 5     | 5      | 5      | 5         | 5     | 5        |
|               |               |                 | Mean      | 6.06                     | 13.3     | 39.7  | 65.6   | 22.0   | 33.5      | 11.9  | 1.81     |
|               |               |                 | Sdev      | 0.449                    | 1.00     | 2.74  | 0.99   | 0.15   | 0.47      | 0.39  | 0.071    |

RBC - RED BLOOD CELLS  
MCV - MEAN CORPUSCULAR VOLUME  
RDW - RED CELL DISTRIBUTION WIDTH

HGB - HEMOGLOBIN  
MCH - MEAN CORPUSCULAR HEMOGLOBIN  
HDW - HEMOGLOBIN DISTRIB. WIDTH

HCT - HEMATOCRIT  
MCHC - MEAN CORPUSCULAR HGB CONC.

CONFIDENTIAL

Appendix 6  
Day 28 Hematology Data  
Test period

Session 1 (Scheduled)  
Fexinidazole

Study Number: 0505-2007

| M a l e s     |               |                 |           |      |                        |         |           |        |                          |        |       |
|---------------|---------------|-----------------|-----------|------|------------------------|---------|-----------|--------|--------------------------|--------|-------|
| Dose Level    | Animal Number | Group/ Subgroup | Study Day | R %  | RAB 10 <sup>9</sup> /L | MCVr fL | CHCM g/dL | CHr pg | PLT 10 <sup>3</sup> /mcL | MPV fL | PDW % |
| Vehicle       |               |                 |           |      |                        |         |           |        |                          |        |       |
|               | 2516          | 1/1             | 28        | 1.3  | 82.6                   | 90.9    | 26.8      | 24.3   | 221.                     | 11.5   | 57.7  |
|               | 2518          | 1/1             | 28        | 1.2  | 73.0                   | 91.2    | 27.9      | 25.3   | 302.                     | 10.3   | 58.2  |
|               | 2520          | 1/1             | 28        | 0.8  | 52.0                   | 87.1    | 27.6      | 23.9   | 493.                     | 11.2   | 64.5  |
|               | 2527          | 1/1             | 28        | 0.5  | 27.1                   | 92.4    | 27.0      | 24.9   | 418.                     | 10.7   | 57.1  |
|               | 2533          | 1/1             | 28        | 1.2  | 67.9                   | 87.1    | 28.0      | 24.3   | 415.                     | 9.5    | 55.9  |
|               |               |                 | N         | 5    | 5                      | 5       | 5         | 5      | 5                        | 5      | 5     |
|               |               |                 | Mean      | 1.0  | 60.5                   | 89.7    | 27.5      | 24.5   | 370.                     | 10.6   | 58.7  |
|               |               |                 | Sdev      | 0.35 | 21.72                  | 2.47    | 0.54      | 0.55   | 107.6                    | 0.79   | 3.36  |
| 50 mg/kg/day  |               |                 |           |      |                        |         |           |        |                          |        |       |
|               | 2514          | 2/1             | 28        | 1.0  | 66.4                   | 92.8    | 27.0      | 25.0   | 252.                     | 12.0   | 58.9  |
|               | 2521          | 2/1             | 28        | 0.7  | 51.9                   | 88.2    | 28.8      | 25.3   | 227.                     | 10.3   | 60.6  |
|               | 2529          | 2/1             | 28        | 0.4  | 25.0                   | 87.4    | 28.2      | 24.5   | 248.                     | 10.5   | 64.9  |
|               |               |                 | N         | 3    | 3                      | 3       | 3         | 3      | 3                        | 3      | 3     |
|               |               |                 | Mean      | 0.7  | 47.8                   | 89.5    | 28.0      | 24.9   | 242.                     | 10.9   | 61.5  |
|               |               |                 | Sdev      | 0.29 | 21.01                  | 2.91    | 0.92      | 0.40   | 13.4                     | 0.93   | 3.09  |
| 200 mg/kg/day |               |                 |           |      |                        |         |           |        |                          |        |       |
|               | 2515          | 3/1             | 28        | 0.5  | 36.8                   | 86.0    | 27.8      | 23.7   | 263.                     | 11.1   | 58.1  |
|               | 2523          | 3/1             | 28        | 0.6  | 32.1                   | 85.5    | 27.7      | 23.6   | 603.                     | 9.1    | 58.0  |
|               | 2526          | 3/1             | 28        | 0.4  | 23.7                   | 90.3    | 28.0      | 25.2   | 286.                     | 10.9   | 58.8  |
|               |               |                 | N         | 3    | 3                      | 3       | 3         | 3      | 3                        | 3      | 3     |
|               |               |                 | Mean      | 0.5  | 30.9                   | 87.3    | 27.8      | 24.2   | 384.                     | 10.4   | 58.3  |
|               |               |                 | Sdev      | 0.11 | 6.64                   | 2.64    | 0.15      | 0.90   | 190.0                    | 1.10   | 0.44  |
| 800 mg/kg/day |               |                 |           |      |                        |         |           |        |                          |        |       |
|               | 2517          | 4/1             | 28        | 0.4  | 22.5                   | 83.6    | 28.5      | 23.7   | 374.                     | 9.8    | 58.6  |
|               | 2519          | 4/1             | 28        | 0.3  | 19.9                   | 87.8    | 28.9      | 25.2   | 271.                     | 11.0   | 64.5  |
|               | 2525          | 4/1             | 28        | 0.8  | 50.1                   | 90.6    | 28.0      | 25.2   | 254.                     | 12.8   | 67.8  |
|               | 2528          | 4/1             | 28        | 0.9  | 51.0                   | 89.0    | 27.9      | 24.8   | 200.                     | 9.2    | 68.0  |
|               | 2530          | 4/1             | 28        | 0.5  | 26.2                   | 87.9    | 28.0      | 24.5   | 265.                     | 11.8   | 63.2  |
|               |               |                 | N         | 5    | 5                      | 5       | 5         | 5      | 5                        | 5      | 5     |
|               |               |                 | Mean      | 0.6  | 33.9                   | 87.8    | 28.3      | 24.7   | 273.                     | 10.9   | 64.4  |
|               |               |                 | Sdev      | 0.24 | 15.33                  | 2.59    | 0.43      | 0.62   | 63.2                     | 1.46   | 3.86  |

R - RETICULOCYTES  
CHCM - MEAN HEMOGLOBIN CONC. RETIC.  
MPV - MEAN PLATELET VOLUME

RAB - RETICULOCYTES ABS  
CHr - CELLULAR HEMOGLOBIN RETIC.  
PDW - PLATELET DISTRIBUTION WIDTH

MCVr - MEAN CORPUSCULAR VOL. RETIC.  
PLT - PLATELETS

CONFIDENTIAL

Appendix 6  
Day 28 Hematology Data  
Test period

Session 1 (Scheduled)  
Fexinidazole

Study Number: 0505-2007

| M a l e s     |               |                 |           |       |                          |                          |                           |                          |                          |                          |  |
|---------------|---------------|-----------------|-----------|-------|--------------------------|--------------------------|---------------------------|--------------------------|--------------------------|--------------------------|--|
| Dose Level    | Animal Number | Group/ Subgroup | Study Day | PCT % | WBC 10 <sup>3</sup> /mcL | NAB 10 <sup>3</sup> /mcL | LYAB 10 <sup>3</sup> /mcL | MAB 10 <sup>3</sup> /mcL | EAB 10 <sup>3</sup> /mcL | BAB 10 <sup>3</sup> /mcL |  |
| Vehicle       |               |                 |           |       |                          |                          |                           |                          |                          |                          |  |
|               | 2516          | 1/1             | 28        | 0.25  | 9.38                     | 5.93                     | 2.91                      | 0.28                     | 0.15                     | 0.05                     |  |
|               | 2518          | 1/1             | 28        | 0.31  | 9.08                     | 5.82                     | 2.63                      | 0.37                     | 0.17                     | 0.05                     |  |
|               | 2520          | 1/1             | 28        | 0.55  | 6.49                     | 3.41                     | 2.62                      | 0.27                     | 0.13                     | 0.02                     |  |
|               | 2527          | 1/1             | 28        | 0.45  | 11.61                    | 7.62                     | 2.82                      | 0.93                     | 0.15                     | 0.04                     |  |
|               | 2533          | 1/1             | 28        | 0.39  | 8.19                     | 4.78                     | 2.79                      | 0.36                     | 0.19                     | 0.03                     |  |
|               |               |                 | N         | 5     | 5                        | 5                        | 5                         | 5                        | 5                        | 5                        |  |
|               |               |                 | Mean      | 0.39  | 8.95                     | 5.51                     | 2.75                      | 0.44                     | 0.16                     | 0.04                     |  |
|               |               |                 | Sdev      | 0.117 | 1.865                    | 1.555                    | 0.126                     | 0.277                    | 0.023                    | 0.013                    |  |
| 50 mg/kg/day  |               |                 |           |       |                          |                          |                           |                          |                          |                          |  |
|               | 2514          | 2/1             | 28        | 0.30  | 8.79                     | 4.91                     | 3.26                      | 0.28                     | 0.23                     | 0.06                     |  |
|               | 2521          | 2/1             | 28        | 0.23  | 7.96                     | 4.72                     | 2.69                      | 0.20                     | 0.23                     | 0.07                     |  |
|               | 2529          | 2/1             | 28        | 0.26  | 6.42                     | 3.45                     | 2.49                      | 0.20                     | 0.13                     | 0.09                     |  |
|               |               |                 | N         | 3     | 3                        | 3                        | 3                         | 3                        | 3                        | 3                        |  |
|               |               |                 | Mean      | 0.26  | 7.72                     | 4.36                     | 2.81                      | 0.23                     | 0.20                     | 0.07                     |  |
|               |               |                 | Sdev      | 0.035 | 1.203                    | 0.794                    | 0.400                     | 0.046                    | 0.058                    | 0.015                    |  |
| 200 mg/kg/day |               |                 |           |       |                          |                          |                           |                          |                          |                          |  |
|               | 2515          | 3/1             | 28        | 0.29  | 8.49                     | 6.14                     | 1.89                      | 0.20                     | 0.19                     | 0.05                     |  |
|               | 2523          | 3/1             | 28        | 0.55  | 8.17                     | 5.15                     | 2.39                      | 0.29                     | 0.24                     | 0.04                     |  |
|               | 2526          | 3/1             | 28        | 0.31  | 6.67                     | 3.91                     | 2.28                      | 0.25                     | 0.13                     | 0.05                     |  |
|               |               |                 | N         | 3     | 3                        | 3                        | 3                         | 3                        | 3                        | 3                        |  |
|               |               |                 | Mean      | 0.38  | 7.78                     | 5.07                     | 2.19                      | 0.25                     | 0.19                     | 0.05                     |  |
|               |               |                 | Sdev      | 0.145 | 0.972                    | 1.117                    | 0.263                     | 0.045                    | 0.055                    | 0.006                    |  |
| 800 mg/kg/day |               |                 |           |       |                          |                          |                           |                          |                          |                          |  |
|               | 2517          | 4/1             | 28        | 0.37  | 6.83                     | 5.32                     | 1.13                      | 0.30                     | 0.03                     | 0.02                     |  |
|               | 2519          | 4/1             | 28        | 0.30  | 6.52                     | 3.43                     | 2.22                      | 0.31                     | 0.48                     | 0.05                     |  |
|               | 2525          | 4/1             | 28        | 0.33  | 9.91                     | 7.18                     | 2.31                      | 0.26                     | 0.10                     | 0.03                     |  |
|               | 2528          | 4/1             | 28        | 0.18  | 9.28                     | 6.14                     | 2.47                      | 0.48                     | 0.11                     | 0.04                     |  |
|               | 2530          | 4/1             | 28        | 0.31  | 6.64                     | 3.87                     | 2.33                      | 0.27                     | 0.04                     | 0.05                     |  |
|               |               |                 | N         | 5     | 5                        | 5                        | 5                         | 5                        | 5                        | 5                        |  |
|               |               |                 | Mean      | 0.30  | 7.84                     | 5.19                     | 2.09                      | 0.32                     | 0.15                     | 0.04                     |  |
|               |               |                 | Sdev      | 0.071 | 1.625                    | 1.559                    | 0.545                     | 0.090                    | 0.187                    | 0.013                    |  |

PCT - PLATELET HEMATOCRIT  
LYAB - LYMPHOCYTES ABS  
BAB - BASOPHILS ABS

WBC - WHITE BLOOD CELLS  
MAB - MONOCYTES ABS

NAB - NEUTROPHILS ABS  
EAB - EOSINOPHILS ABS

CONFIDENTIAL

Appendix 6  
Day 28 Hematology Data  
Test period

Session 1 (Scheduled)  
Fexinidazole

Study Number: 0505-2007

| M a l e s     |               |                 |           |                           |       |      |      |      |      |      |
|---------------|---------------|-----------------|-----------|---------------------------|-------|------|------|------|------|------|
| Dose Level    | Animal Number | Group/ Subgroup | Study Day | LUAB 10 <sup>3</sup> /mcL | N %   | LY % | M %  | E %  | B %  | LU % |
| Vehicle       |               |                 |           |                           |       |      |      |      |      |      |
|               | 2516          | 1/1             | 28        | 0.05                      | 63.3  | 31.0 | 3.0  | 1.6  | 0.5  | 0.5  |
|               | 2518          | 1/1             | 28        | 0.05                      | 64.1  | 28.9 | 4.1  | 1.9  | 0.5  | 0.5  |
|               | 2520          | 1/1             | 28        | 0.03                      | 52.6  | 40.5 | 4.1  | 2.0  | 0.3  | 0.5  |
|               | 2527          | 1/1             | 28        | 0.06                      | 65.6  | 24.3 | 8.0  | 1.3  | 0.3  | 0.5  |
|               | 2533          | 1/1             | 28        | 0.03                      | 58.3  | 34.1 | 4.4  | 2.4  | 0.4  | 0.4  |
|               |               |                 | N         | 5                         | 5     | 5    | 5    | 5    | 5    | 5    |
|               |               |                 | Mean      | 0.04                      | 60.8  | 31.8 | 4.7  | 1.8  | 0.4  | 0.5  |
|               |               |                 | Sdev      | 0.013                     | 5.33  | 6.05 | 1.91 | 0.42 | 0.10 | 0.04 |
| 50 mg/kg/day  |               |                 |           |                           |       |      |      |      |      |      |
|               | 2514          | 2/1             | 28        | 0.05                      | 55.9  | 37.1 | 3.2  | 2.6  | 0.7  | 0.6  |
|               | 2521          | 2/1             | 28        | 0.05                      | 59.4  | 33.8 | 2.5  | 2.9  | 0.8  | 0.6  |
|               | 2529          | 2/1             | 28        | 0.06                      | 53.7  | 38.8 | 3.2  | 2.1  | 1.3  | 0.9  |
|               |               |                 | N         | 3                         | 3     | 3    | 3    | 3    | 3    | 3    |
|               |               |                 | Mean      | 0.05                      | 56.3  | 36.6 | 3.0  | 2.5  | 0.9  | 0.7  |
|               |               |                 | Sdev      | 0.006                     | 2.87  | 2.54 | 0.40 | 0.40 | 0.32 | 0.17 |
| 200 mg/kg/day |               |                 |           |                           |       |      |      |      |      |      |
|               | 2515          | 3/1             | 28        | 0.04                      | 72.3  | 22.2 | 2.3  | 2.2  | 0.6  | 0.4  |
|               | 2523          | 3/1             | 28        | 0.06                      | 63.0  | 29.2 | 3.6  | 2.9  | 0.5  | 0.7  |
|               | 2526          | 3/1             | 28        | 0.05                      | 58.6  | 34.1 | 3.8  | 1.9  | 0.8  | 0.8  |
|               |               |                 | N         | 3                         | 3     | 3    | 3    | 3    | 3    | 3    |
|               |               |                 | Mean      | 0.05                      | 64.6  | 28.5 | 3.2  | 2.3  | 0.6  | 0.6  |
|               |               |                 | Sdev      | 0.010                     | 6.99  | 5.98 | 0.81 | 0.51 | 0.15 | 0.21 |
| 800 mg/kg/day |               |                 |           |                           |       |      |      |      |      |      |
|               | 2517          | 4/1             | 28        | 0.02                      | 78.0  | 16.6 | 4.3  | 0.5  | 0.3  | 0.3  |
|               | 2519          | 4/1             | 28        | 0.04                      | 52.5  | 34.1 | 4.7  | 7.3  | 0.7  | 0.6  |
|               | 2525          | 4/1             | 28        | 0.03                      | 72.4  | 23.4 | 2.6  | 1.0  | 0.3  | 0.3  |
|               | 2528          | 4/1             | 28        | 0.04                      | 66.1  | 26.6 | 5.2  | 1.2  | 0.4  | 0.4  |
|               | 2530          | 4/1             | 28        | 0.08                      | 58.3  | 35.1 | 4.1  | 0.6  | 0.7  | 1.2  |
|               |               |                 | N         | 5                         | 5     | 5    | 5    | 5    | 5    | 5    |
|               |               |                 | Mean      | 0.04                      | 65.5  | 27.2 | 4.2  | 2.1  | 0.5  | 0.6  |
|               |               |                 | Sdev      | 0.023                     | 10.31 | 7.70 | 0.98 | 2.91 | 0.20 | 0.38 |

LUAB - LARGE UNSTAINED CELLS ABS  
M - MONOCYTES %  
LU - LARGE UNSTAINED CELLS %

N - NEUTROPHILS %  
E - EOSINOPHILS %

LY - LYMPHOCITES %  
B - BASOPHILS %



CONFIDENTIAL

Appendix 6  
Day 28 Hematology Data  
Test period

Session 1 (Scheduled)  
Fexinidazole

Study Number: 0505-2007

| F e m a l e s |               |                 |           |                          |          |       |        |        |           |       |          |
|---------------|---------------|-----------------|-----------|--------------------------|----------|-------|--------|--------|-----------|-------|----------|
| Dose Level    | Animal Number | Group/ Subgroup | Study Day | RBC 10 <sup>6</sup> /mcL | HGB g/dL | HCT % | MCV fL | MCH pg | MCHC g/dL | RDW % | HDW g/dL |
| Vehicle       |               |                 |           |                          |          |       |        |        |           |       |          |
|               | 2560          | 1/1             | 28        | 5.57                     | 12.3     | 37.2  | 66.8   | 22.0   | 33.0      | 11.7  | 1.75     |
|               | 2568          | 1/1             | 28        | 6.57                     | 13.9     | 44.0  | 67.0   | 21.2   | 31.7      | 11.7  | 1.76     |
|               | 2572          | 1/1             | 28        | 5.91                     | 12.7     | 39.2  | 66.2   | 21.4   | 32.3      | 12.1  | 1.74     |
|               | 2575          | 1/1             | 28        | 6.82                     | 15.2     | 46.2  | 67.8   | 22.3   | 32.9      | 11.1  | 1.64     |
|               | 2577          | 1/1             | 28        | 7.00                     | 15.4     | 46.4  | 66.3   | 22.0   | 33.1      | 12.0  | 1.88     |
|               |               |                 | N         | 5                        | 5        | 5     | 5      | 5      | 5         | 5     | 5        |
|               |               |                 | Mean      | 6.37                     | 13.9     | 42.6  | 66.8   | 21.8   | 32.6      | 11.7  | 1.75     |
|               |               |                 | Sdev      | 0.611                    | 1.41     | 4.19  | 0.64   | 0.46   | 0.59      | 0.39  | 0.085    |
| 50 mg/kg/day  |               |                 |           |                          |          |       |        |        |           |       |          |
|               | 2562          | 2/1             | 28        | 7.29                     | 15.7     | 47.7  | 65.4   | 21.5   | 32.9      | 12.2  | 1.86     |
|               | 2563          | 2/1             | 28        | 6.89                     | 15.4     | 46.8  | 67.8   | 22.4   | 33.0      | 13.0  | 2.00     |
|               | 2576          | 2/1             | 28        | 6.72                     | 15.4     | 45.1  | 67.1   | 22.9   | 34.0      | 12.1  | 1.80     |
|               |               |                 | N         | 3                        | 3        | 3     | 3      | 3      | 3         | 3     | 3        |
|               |               |                 | Mean      | 6.97                     | 15.5     | 46.5  | 66.8   | 22.3   | 33.3      | 12.4  | 1.89     |
|               |               |                 | Sdev      | 0.293                    | 0.17     | 1.32  | 1.23   | 0.71   | 0.61      | 0.49  | 0.103    |
| 200 mg/kg/day |               |                 |           |                          |          |       |        |        |           |       |          |
|               | 2561          | 3/1             | 28        | 6.01                     | 13.3     | 39.6  | 65.8   | 22.0   | 33.5      | 11.8  | 1.70     |
|               | 2570          | 3/1             | 28        | 6.16                     | 13.0     | 39.9  | 64.7   | 21.1   | 32.7      | 10.9  | 1.75     |
|               | 2567          | 3/1             | 28        | 6.63                     | 14.7     | 44.0  | 66.3   | 22.2   | 33.4      | 11.4  | 1.71     |
|               |               |                 | N         | 3                        | 3        | 3     | 3      | 3      | 3         | 3     | 3        |
|               |               |                 | Mean      | 6.27                     | 13.7     | 41.2  | 65.6   | 21.8   | 33.2      | 11.4  | 1.72     |
|               |               |                 | Sdev      | 0.323                    | 0.91     | 2.46  | 0.82   | 0.59   | 0.44      | 0.45  | 0.026    |
| 800 mg/kg/day |               |                 |           |                          |          |       |        |        |           |       |          |
|               | 2564          | 4/1             | 28        | 6.04                     | 13.5     | 40.3  | 66.7   | 22.4   | 33.6      | 11.2  | 1.77     |
|               | 2565          | 4/1             | 28        | 7.32                     | 16.3     | 49.2  | 67.2   | 22.2   | 33.1      | 11.8  | 1.86     |
|               | 2569          | 4/1             | 28        | 7.11                     | 15.3     | 46.5  | 65.4   | 21.6   | 33.0      | 11.5  | 1.79     |
|               | 2571          | 4/1             | 28        | 6.63                     | 14.0     | 42.7  | 64.4   | 21.1   | 32.8      | 11.4  | 1.79     |
|               | 2573          | 4/1             | 28        | 6.91                     | 15.3     | 46.3  | 67.0   | 22.2   | 33.1      | 11.3  | 1.73     |
|               |               |                 | N         | 5                        | 5        | 5     | 5      | 5      | 5         | 5     | 5        |
|               |               |                 | Mean      | 6.80                     | 14.9     | 45.0  | 66.1   | 21.9   | 33.1      | 11.4  | 1.79     |
|               |               |                 | Sdev      | 0.496                    | 1.12     | 3.50  | 1.20   | 0.54   | 0.29      | 0.23  | 0.047    |

RBC - RED BLOOD CELLS  
MCV - MEAN CORPUSCULAR VOLUME  
RDW - RED CELL DISTRIBUTION WIDTH

HGB - HEMOGLOBIN  
MCH - MEAN CORPUSCULAR HEMOGLOBIN  
HDW - HEMOGLOBIN DISTRIB. WIDTH

HCT - HEMATOCRIT  
MCHC - MEAN CORPUSCULAR HGB CONC.

CONFIDENTIAL

Appendix 6  
Day 28 Hematology Data  
Test period

Session 1 (Scheduled)  
Fexinidazole

Study Number: 0505-2007

| F e m a l e s |               |                 |           |      |                        |         |           |        |                          |        |       |
|---------------|---------------|-----------------|-----------|------|------------------------|---------|-----------|--------|--------------------------|--------|-------|
| Dose Level    | Animal Number | Group/ Subgroup | Study Day | R %  | RAB 10 <sup>9</sup> /L | MCVr fL | CHCM g/dL | CHr pg | PLT 10 <sup>3</sup> /mcL | MPV fL | PDW % |
| Vehicle       |               |                 |           |      |                        |         |           |        |                          |        |       |
|               | 2560          | 1/1             | 28        | 1.3  | 73.6                   | 85.8    | 28.0      | 24.0   | 446.                     | 10.0   | 57.4  |
|               | 2568          | 1/1             | 28        | 0.6  | 41.6                   | 88.8    | 27.8      | 24.6   | 358.                     | 8.4    | 47.3  |
|               | 2572          | 1/1             | 28        | 0.5  | 29.0                   | 89.4    | 27.6      | 24.6   | 461.                     | 9.4    | 50.3  |
|               | 2575          | 1/1             | 28        | 0.5  | 31.8                   | 88.0    | 28.2      | 24.7   | 466.                     | 8.9    | 48.7  |
|               | 2577          | 1/1             | 28        | 0.3  | 17.7                   | 86.7    | 27.4      | 23.7   | 389.                     | 9.0    | 47.1  |
|               |               |                 | N         | 5    | 5                      | 5       | 5         | 5      | 5                        | 5      | 5     |
|               |               |                 | Mean      | 0.6  | 38.7                   | 87.7    | 27.8      | 24.3   | 424.                     | 9.1    | 50.2  |
|               |               |                 | Sdev      | 0.41 | 21.27                  | 1.48    | 0.32      | 0.44   | 48.0                     | 0.60   | 4.25  |
| 50 mg/kg/day  |               |                 |           |      |                        |         |           |        |                          |        |       |
|               | 2562          | 2/1             | 28        | 0.9  | 65.4                   | 87.1    | 28.3      | 24.5   | 381.                     | 9.6    | 59.7  |
|               | 2563          | 2/1             | 28        | 2.0  | 137.4                  | 92.3    | 26.9      | 24.7   | 373.                     | 10.3   | 53.7  |
|               | 2576          | 2/1             | 28        | 0.9  | 57.5                   | 89.9    | 28.1      | 25.1   | 406.                     | 8.6    | 52.1  |
|               |               |                 | N         | 3    | 3                      | 3       | 3         | 3      | 3                        | 3      | 3     |
|               |               |                 | Mean      | 1.3  | 86.8                   | 89.8    | 27.8      | 24.8   | 387.                     | 9.5    | 55.2  |
|               |               |                 | Sdev      | 0.64 | 44.03                  | 2.60    | 0.76      | 0.31   | 17.2                     | 0.85   | 4.01  |
| 200 mg/kg/day |               |                 |           |      |                        |         |           |        |                          |        |       |
|               | 2561          | 3/1             | 28        | 0.4  | 23.9                   | 90.5    | 27.9      | 25.2   | 355.                     | 10.2   | 59.6  |
|               | 2570          | 3/1             | 28        | 0.5  | 31.9                   | 82.5    | 27.6      | 22.7   | 494.                     | 9.7    | 55.1  |
|               | 2567          | 3/1             | 28        | 0.2  | 15.5                   | 86.7    | 27.6      | 23.8   | 240.                     | 10.5   | 62.6  |
|               |               |                 | N         | 3    | 3                      | 3       | 3         | 3      | 3                        | 3      | 3     |
|               |               |                 | Mean      | 0.4  | 23.8                   | 86.6    | 27.7      | 23.9   | 363.                     | 10.1   | 59.1  |
|               |               |                 | Sdev      | 0.15 | 8.20                   | 4.00    | 0.17      | 1.25   | 127.2                    | 0.40   | 3.77  |
| 800 mg/kg/day |               |                 |           |      |                        |         |           |        |                          |        |       |
|               | 2564          | 4/1             | 28        | 0.5  | 29.4                   | 88.8    | 27.6      | 24.5   | 303.                     | 10.2   | 55.3  |
|               | 2565          | 4/1             | 28        | 0.9  | 62.4                   | 91.0    | 27.3      | 24.7   | 239.                     | 11.3   | 57.4  |
|               | 2569          | 4/1             | 28        | 0.5  | 32.1                   | 85.8    | 28.1      | 24.1   | 338.                     | 10.1   | 56.7  |
|               | 2571          | 4/1             | 28        | 0.4  | 24.4                   | 85.8    | 27.9      | 23.8   | 283.                     | 9.5    | 58.5  |
|               | 2573          | 4/1             | 28        | 0.2  | 13.7                   | 89.9    | 28.4      | 25.5   | 290.                     | 10.5   | 58.9  |
|               |               |                 | N         | 5    | 5                      | 5       | 5         | 5      | 5                        | 5      | 5     |
|               |               |                 | Mean      | 0.5  | 32.4                   | 88.3    | 27.9      | 24.5   | 291.                     | 10.3   | 57.4  |
|               |               |                 | Sdev      | 0.24 | 18.19                  | 2.38    | 0.43      | 0.65   | 35.8                     | 0.66   | 1.44  |

R - RETICULOCYTES  
CHCM - MEAN HEMOGLOBIN CONC. RETIC.  
MPV - MEAN PLATELET VOLUME

RAB - RETICULOCYTES ABS  
CHr - CELLULAR HEMOGLOBIN RETIC.  
PDW - PLATELET DISTRIBUTION WIDTH

MCVr - MEAN CORPUSCULAR VOL. RETIC.  
PLT - PLATELETS

CONFIDENTIAL

Appendix 6  
Day 28 Hematology Data  
Test period

Session 1 (Scheduled)  
Fexinidazole

Study Number: 0505-2007

F e m a l e s

| Dose Level    | Animal Number | Group/ Subgroup | Study Day | PCT % | WBC 10 <sup>3</sup> /mcL | NAB 10 <sup>3</sup> /mcL | LYAB 10 <sup>3</sup> /mcL | MAB 10 <sup>3</sup> /mcL | EAB 10 <sup>3</sup> /mcL | BAB 10 <sup>3</sup> /mcL |
|---------------|---------------|-----------------|-----------|-------|--------------------------|--------------------------|---------------------------|--------------------------|--------------------------|--------------------------|
| Vehicle       |               |                 |           |       |                          |                          |                           |                          |                          |                          |
|               | 2560          | 1/1             | 28        | 0.45  | 13.22                    | 8.04                     | 4.35                      | 0.56                     | 0.12                     | 0.07                     |
|               | 2568          | 1/1             | 28        | 0.30  | 11.94                    | 7.67                     | 3.45                      | 0.56                     | 0.16                     | 0.04                     |
|               | 2572          | 1/1             | 28        | 0.43  | 10.45                    | 6.86                     | 2.84                      | 0.46                     | 0.10                     | 0.09                     |
|               | 2575          | 1/1             | 28        | 0.41  | 15.06                    | 9.10                     | 4.27                      | 0.97                     | 0.57                     | 0.06                     |
|               | 2577          | 1/1             | 28        | 0.35  | 8.28                     | 4.62                     | 2.95                      | 0.46                     | 0.16                     | 0.04                     |
|               |               |                 | N         | 5     | 5                        | 5                        | 5                         | 5                        | 5                        | 5                        |
|               |               |                 | Mean      | 0.39  | 11.79                    | 7.26                     | 3.57                      | 0.60                     | 0.22                     | 0.06                     |
|               |               |                 | Sdev      | 0.062 | 2.592                    | 1.680                    | 0.712                     | 0.212                    | 0.196                    | 0.021                    |
| 50 mg/kg/day  |               |                 |           |       |                          |                          |                           |                          |                          |                          |
|               | 2562          | 2/1             | 28        | 0.37  | 8.98                     | 5.64                     | 2.56                      | 0.45                     | 0.24                     | 0.05                     |
|               | 2563          | 2/1             | 28        | 0.38  | 12.68                    | 9.15                     | 2.61                      | 0.66                     | 0.14                     | 0.07                     |
|               | 2576          | 2/1             | 28        | 0.35  | 11.52                    | 7.22                     | 2.68                      | 0.54                     | 0.94                     | 0.08                     |
|               |               |                 | N         | 3     | 3                        | 3                        | 3                         | 3                        | 3                        | 3                        |
|               |               |                 | Mean      | 0.37  | 11.06                    | 7.34                     | 2.62                      | 0.55                     | 0.44                     | 0.07                     |
|               |               |                 | Sdev      | 0.015 | 1.892                    | 1.758                    | 0.060                     | 0.105                    | 0.436                    | 0.015                    |
| 200 mg/kg/day |               |                 |           |       |                          |                          |                           |                          |                          |                          |
|               | 2561          | 3/1             | 28        | 0.36  | 11.00                    | 7.51                     | 2.73                      | 0.59                     | 0.07                     | 0.06                     |
|               | 2570          | 3/1             | 28        | 0.48  | 8.93                     | 6.24                     | 2.01                      | 0.35                     | 0.26                     | 0.04                     |
|               | 2567          | 3/1             | 28        | 0.25  | 10.05                    | 5.96                     | 3.22                      | 0.52                     | 0.15                     | 0.10                     |
|               |               |                 | N         | 3     | 3                        | 3                        | 3                         | 3                        | 3                        | 3                        |
|               |               |                 | Mean      | 0.36  | 9.99                     | 6.57                     | 2.65                      | 0.49                     | 0.16                     | 0.07                     |
|               |               |                 | Sdev      | 0.115 | 1.036                    | 0.826                    | 0.609                     | 0.123                    | 0.095                    | 0.031                    |
| 800 mg/kg/day |               |                 |           |       |                          |                          |                           |                          |                          |                          |
|               | 2564          | 4/1             | 28        | 0.31  | 7.64                     | 4.06                     | 2.52                      | 0.33                     | 0.59                     | 0.04                     |
|               | 2565          | 4/1             | 28        | 0.27  | 7.32                     | 4.82                     | 1.59                      | 0.26                     | 0.57                     | 0.04                     |
|               | 2569          | 4/1             | 28        | 0.34  | 9.19                     | 6.18                     | 2.46                      | 0.36                     | 0.09                     | 0.04                     |
|               | 2571          | 4/1             | 28        | 0.27  | 7.64                     | 4.87                     | 2.35                      | 0.24                     | 0.12                     | 0.03                     |
|               | 2573          | 4/1             | 28        | 0.30  | 7.60                     | 4.90                     | 2.18                      | 0.31                     | 0.09                     | 0.05                     |
|               |               |                 | N         | 5     | 5                        | 5                        | 5                         | 5                        | 5                        | 5                        |
|               |               |                 | Mean      | 0.30  | 7.88                     | 4.97                     | 2.22                      | 0.30                     | 0.29                     | 0.04                     |
|               |               |                 | Sdev      | 0.029 | 0.746                    | 0.763                    | 0.375                     | 0.049                    | 0.263                    | 0.007                    |

PCT - PLATELET HEMATOCRIT  
LYAB - LYMPHOCYTES ABS  
BAB - BASOPHILS ABS

WBC - WHITE BLOOD CELLS  
MAB - MONOCYTES ABS

NAB - NEUTROPHILS ABS  
EAB - EOSINOPHILS ABS

CONFIDENTIAL

Appendix 6  
Day 28 Hematology Data  
Test period

Session 1 (Scheduled)  
Fexinidazole

Study Number: 0505-2007

| F e m a l e s |               |                 |           |                           |      |      |      |      |      |      |
|---------------|---------------|-----------------|-----------|---------------------------|------|------|------|------|------|------|
| Dose Level    | Animal Number | Group/ Subgroup | Study Day | LUAB 10 <sup>3</sup> /mcL | N %  | LY % | M %  | E %  | B %  | LU % |
| Vehicle       |               |                 |           |                           |      |      |      |      |      |      |
|               | 2560          | 1/1             | 28        | 0.08                      | 60.8 | 32.9 | 4.3  | 0.9  | 0.5  | 0.6  |
|               | 2568          | 1/1             | 28        | 0.06                      | 64.3 | 28.9 | 4.7  | 1.3  | 0.3  | 0.5  |
|               | 2572          | 1/1             | 28        | 0.10                      | 65.7 | 27.1 | 4.4  | 0.9  | 0.9  | 0.9  |
|               | 2575          | 1/1             | 28        | 0.09                      | 60.4 | 28.4 | 6.4  | 3.8  | 0.4  | 0.6  |
|               | 2577          | 1/1             | 28        | 0.05                      | 55.8 | 35.6 | 5.5  | 1.9  | 0.5  | 0.6  |
|               |               |                 | N         | 5                         | 5    | 5    | 5    | 5    | 5    | 5    |
|               |               |                 | Mean      | 0.08                      | 61.4 | 30.6 | 5.1  | 1.8  | 0.5  | 0.6  |
|               |               |                 | Sdev      | 0.021                     | 3.86 | 3.54 | 0.88 | 1.21 | 0.23 | 0.15 |
| 50 mg/kg/day  |               |                 |           |                           |      |      |      |      |      |      |
|               | 2562          | 2/1             | 28        | 0.04                      | 62.8 | 28.5 | 5.0  | 2.7  | 0.6  | 0.5  |
|               | 2563          | 2/1             | 28        | 0.05                      | 72.1 | 20.6 | 5.2  | 1.1  | 0.5  | 0.4  |
|               | 2576          | 2/1             | 28        | 0.06                      | 62.7 | 23.2 | 4.7  | 8.2  | 0.7  | 0.5  |
|               |               |                 | N         | 3                         | 3    | 3    | 3    | 3    | 3    | 3    |
|               |               |                 | Mean      | 0.05                      | 65.9 | 24.1 | 5.0  | 4.0  | 0.6  | 0.5  |
|               |               |                 | Sdev      | 0.010                     | 5.40 | 4.03 | 0.25 | 3.72 | 0.10 | 0.06 |
| 200 mg/kg/day |               |                 |           |                           |      |      |      |      |      |      |
|               | 2561          | 3/1             | 28        | 0.04                      | 68.3 | 24.9 | 5.3  | 0.6  | 0.5  | 0.3  |
|               | 2570          | 3/1             | 28        | 0.03                      | 69.9 | 22.5 | 4.0  | 2.9  | 0.4  | 0.3  |
|               | 2567          | 3/1             | 28        | 0.11                      | 59.2 | 32.1 | 5.2  | 1.5  | 1.0  | 1.1  |
|               |               |                 | N         | 3                         | 3    | 3    | 3    | 3    | 3    | 3    |
|               |               |                 | Mean      | 0.06                      | 65.8 | 26.5 | 4.8  | 1.7  | 0.6  | 0.6  |
|               |               |                 | Sdev      | 0.044                     | 5.77 | 5.00 | 0.72 | 1.16 | 0.32 | 0.46 |
| 800 mg/kg/day |               |                 |           |                           |      |      |      |      |      |      |
|               | 2564          | 4/1             | 28        | 0.09                      | 53.2 | 33.0 | 4.4  | 7.8  | 0.5  | 1.2  |
|               | 2565          | 4/1             | 28        | 0.04                      | 65.8 | 21.8 | 3.5  | 7.8  | 0.6  | 0.5  |
|               | 2569          | 4/1             | 28        | 0.06                      | 67.3 | 26.7 | 3.9  | 0.9  | 0.5  | 0.6  |
|               | 2571          | 4/1             | 28        | 0.03                      | 63.8 | 30.8 | 3.1  | 1.5  | 0.4  | 0.4  |
|               | 2573          | 4/1             | 28        | 0.07                      | 64.5 | 28.7 | 4.0  | 1.2  | 0.7  | 1.0  |
|               |               |                 | N         | 5                         | 5    | 5    | 5    | 5    | 5    | 5    |
|               |               |                 | Mean      | 0.06                      | 62.9 | 28.2 | 3.8  | 3.8  | 0.5  | 0.7  |
|               |               |                 | Sdev      | 0.024                     | 5.60 | 4.28 | 0.50 | 3.62 | 0.11 | 0.34 |

LUAB - LARGE UNSTAINED CELLS ABS  
M - MONOCYTES %  
LU - LARGE UNSTAINED CELLS %

N - NEUTROPHILS %  
E - EOSINOPHILS %

LY - LYMPHOCITES %  
B - BASOPHILS %

CONFIDENTIAL

Appendix 6  
Day 42 Hematology Data  
Test period

Session 1 (Scheduled)  
Fexinidazole

Study Number: 0505-2007

| M a l e s     |               |                 |           |                          |          |       |        |        |           |       |          |
|---------------|---------------|-----------------|-----------|--------------------------|----------|-------|--------|--------|-----------|-------|----------|
| Dose Level    | Animal Number | Group/ Subgroup | Study Day | RBC 10 <sup>6</sup> /mcL | HGB g/dL | HCT % | MCV fL | MCH pg | MCHC g/dL | RDW % | HDW g/dL |
| Vehicle       |               |                 |           |                          |          |       |        |        |           |       |          |
|               | 2527          | 1/1             | 42        | 6.01                     | 13.6     | 40.4  | 67.2   | 22.6   | 33.7      | 12.8  | 1.76     |
|               | 2533          | 1/1             | 42        | 5.88                     | 12.6     | 39.6  | 67.3   | 21.5   | 31.9      | 12.7  | 1.79     |
|               |               |                 | N         | 2                        | 2        | 2     | 2      | 2      | 2         | 2     | 2        |
|               |               |                 | Mean      | 5.95                     | 13.1     | 40.0  | 67.3   | 22.1   | 32.8      | 12.8  | 1.78     |
|               |               |                 | Sdev      | 0.092                    | 0.71     | 0.57  | 0.07   | 0.78   | 1.27      | 0.07  | 0.021    |
| 800 mg/kg/day |               |                 |           |                          |          |       |        |        |           |       |          |
|               | 2528          | 4/1             | 42        | 6.88                     | 15.2     | 46.0  | 66.9   | 22.1   | 33.0      | 12.5  | 1.91     |
|               | 2530          | 4/1             | 42        | 6.12                     | 13.6     | 41.6  | 67.9   | 22.1   | 32.6      | 13.1  | 2.03     |
|               |               |                 | N         | 2                        | 2        | 2     | 2      | 2      | 2         | 2     | 2        |
|               |               |                 | Mean      | 6.50                     | 14.4     | 43.8  | 67.4   | 22.1   | 32.8      | 12.8  | 1.97     |
|               |               |                 | Sdev      | 0.537                    | 1.13     | 3.11  | 0.71   | 0.00   | 0.28      | 0.42  | 0.085    |

RBC - RED BLOOD CELLS  
MCV - MEAN CORPUSCULAR VOLUME  
RDW - RED CELL DISTRIBUTION WIDTH

HGB - HEMOGLOBIN  
MCH - MEAN CORPUSCULAR HEMOGLOBIN  
HDW - HEMOGLOBIN DISTRIB. WIDTH

HCT - HEMATOCRIT  
MCHC - MEAN CORPUSCULAR HGB CONC.

CONFIDENTIAL

Appendix 6  
Day 42 Hematology Data  
Test period

Session 1 (Scheduled)  
Fexinidazole

Study Number: 0505-2007

| M a l e s     |               |                 |           |      |                        |         |           |        |                          |        |       |
|---------------|---------------|-----------------|-----------|------|------------------------|---------|-----------|--------|--------------------------|--------|-------|
| Dose Level    | Animal Number | Group/ Subgroup | Study Day | R %  | RAB 10 <sup>9</sup> /L | MCVr fL | CHCM g/dL | CHr pg | PLT 10 <sup>3</sup> /mcL | MPV fL | PDW % |
| Vehicle       |               |                 |           |      |                        |         |           |        |                          |        |       |
|               | 2527          | 1/1             | 42        | 0.6  | 32.8                   | 93.5    | 27.5      | 25.7   | 402.                     | 10.8   | 57.3  |
|               | 2533          | 1/1             | 42        | 1.5  | 86.1                   | 89.2    | 27.9      | 24.8   | 440.                     | 9.1    | 54.2  |
|               |               |                 | N         | 2    | 2                      | 2       | 2         | 2      | 2                        | 2      | 2     |
|               |               |                 | Mean      | 1.0  | 59.5                   | 91.4    | 27.7      | 25.3   | 421.                     | 10.0   | 55.8  |
|               |               |                 | Sdev      | 0.64 | 37.69                  | 3.04    | 0.28      | 0.64   | 26.9                     | 1.20   | 2.19  |
| 800 mg/kg/day |               |                 |           |      |                        |         |           |        |                          |        |       |
|               | 2528          | 4/1             | 42        | 1.0  | 68.9                   | 88.1    | 27.7      | 24.4   | 255.                     | 8.5    | 59.0  |
|               | 2530          | 4/1             | 42        | 1.4  | 86.5                   | 88.4    | 28.1      | 24.7   | 416.                     | 10.9   | 60.6  |
|               |               |                 | N         | 2    | 2                      | 2       | 2         | 2      | 2                        | 2      | 2     |
|               |               |                 | Mean      | 1.2  | 77.7                   | 88.3    | 27.9      | 24.6   | 336.                     | 9.7    | 59.8  |
|               |               |                 | Sdev      | 0.29 | 12.45                  | 0.21    | 0.28      | 0.21   | 113.8                    | 1.70   | 1.13  |

R - RETICULOCYTES  
CHCM - MEAN HEMOGLOBIN CONC. RETIC.  
MPV - MEAN PLATELET VOLUME

RAB - RETICULOCYTES ABS  
CHr - CELLULAR HEMOGLOBIN RETIC.  
PDW - PLATELET DISTRIBUTION WIDTH

MCVr - MEAN CORPUSCULAR VOL. RETIC.  
PLT - PLATELETS

CONFIDENTIAL

Appendix 6  
Day 42 Hematology Data  
Test period

Session 1 (Scheduled)  
Fexinidazole

Study Number: 0505-2007

| M a l e s     |               |                 |           |       |                          |                          |                           |                          |                          |                          |  |
|---------------|---------------|-----------------|-----------|-------|--------------------------|--------------------------|---------------------------|--------------------------|--------------------------|--------------------------|--|
| Dose Level    | Animal Number | Group/ Subgroup | Study Day | PCT % | WBC 10 <sup>3</sup> /mcL | NAB 10 <sup>3</sup> /mcL | LYAB 10 <sup>3</sup> /mcL | MAB 10 <sup>3</sup> /mcL | EAB 10 <sup>3</sup> /mcL | BAB 10 <sup>3</sup> /mcL |  |
| Vehicle       |               |                 |           |       |                          |                          |                           |                          |                          |                          |  |
|               | 2527          | 1/1             | 42        | 0.43  | 9.50                     | 5.82                     | 2.97                      | 0.45                     | 0.23                     | 0.01                     |  |
|               | 2533          | 1/1             | 42        | 0.40  | 7.94                     | 4.42                     | 2.99                      | 0.38                     | 0.07                     | 0.04                     |  |
|               |               |                 | N         | 2     | 2                        | 2                        | 2                         | 2                        | 2                        | 2                        |  |
|               |               |                 | Mean      | 0.42  | 8.72                     | 5.12                     | 2.98                      | 0.42                     | 0.15                     | 0.03                     |  |
|               |               |                 | Sdev      | 0.021 | 1.103                    | 0.990                    | 0.014                     | 0.049                    | 0.113                    | 0.021                    |  |
| 800 mg/kg/day |               |                 |           |       |                          |                          |                           |                          |                          |                          |  |
|               | 2528          | 4/1             | 42        | 0.22  | 5.64                     | 2.69                     | 2.46                      | 0.29                     | 0.09                     | 0.07                     |  |
|               | 2530          | 4/1             | 42        | 0.46  | 7.61                     | 4.51                     | 2.69                      | 0.26                     | 0.06                     | 0.05                     |  |
|               |               |                 | N         | 2     | 2                        | 2                        | 2                         | 2                        | 2                        | 2                        |  |
|               |               |                 | Mean      | 0.34  | 6.63                     | 3.60                     | 2.58                      | 0.28                     | 0.08                     | 0.06                     |  |
|               |               |                 | Sdev      | 0.170 | 1.393                    | 1.287                    | 0.163                     | 0.021                    | 0.021                    | 0.014                    |  |

PCT - PLATELET HEMATOCRIT  
LYAB - LYMPHOCYTES ABS  
BAB - BASOPHILS ABS

WBC - WHITE BLOOD CELLS  
MAB - MONOCYTES ABS

NAB - NEUTROPHILS ABS  
EAB - EOSINOPHILS ABS

CONFIDENTIAL

Appendix 6  
Day 42 Hematology Data  
Test period

Session 1 (Scheduled)  
Fexinidazole

Study Number: 0505-2007

| M a l e s     |               |                 |           |                           |      |      |      |      |      |      |
|---------------|---------------|-----------------|-----------|---------------------------|------|------|------|------|------|------|
| Dose Level    | Animal Number | Group/ Subgroup | Study Day | LUAB 10 <sup>3</sup> /mcL | N %  | LY % | M %  | E %  | B %  | LU % |
| Vehicle       |               |                 |           |                           |      |      |      |      |      |      |
|               | 2527          | 1/1             | 42        | 0.03                      | 61.2 | 31.3 | 4.7  | 2.4  | 0.1  | 0.3  |
|               | 2533          | 1/1             | 42        | 0.05                      | 55.6 | 37.6 | 4.7  | 0.8  | 0.5  | 0.7  |
|               |               |                 | N         | 2                         | 2    | 2    | 2    | 2    | 2    | 2    |
|               |               |                 | Mean      | 0.04                      | 58.4 | 34.5 | 4.7  | 1.6  | 0.3  | 0.5  |
|               |               |                 | Sdev      | 0.014                     | 3.96 | 4.45 | 0.00 | 1.13 | 0.28 | 0.28 |
| 800 mg/kg/day |               |                 |           |                           |      |      |      |      |      |      |
|               | 2528          | 4/1             | 42        | 0.04                      | 47.7 | 43.6 | 5.2  | 1.6  | 1.2  | 0.8  |
|               | 2530          | 4/1             | 42        | 0.03                      | 59.3 | 35.3 | 3.5  | 0.8  | 0.7  | 0.4  |
|               |               |                 | N         | 2                         | 2    | 2    | 2    | 2    | 2    | 2    |
|               |               |                 | Mean      | 0.04                      | 53.5 | 39.5 | 4.4  | 1.2  | 1.0  | 0.6  |
|               |               |                 | Sdev      | 0.007                     | 8.20 | 5.87 | 1.20 | 0.57 | 0.35 | 0.28 |

LUAB - LARGE UNSTAINED CELLS ABS  
M - MONOCYTES %  
LU - LARGE UNSTAINED CELLS %

N - NEUTROPHILS %  
E - EOSINOPHILS %

LY - LYMPHOCITES %  
B - BASOPHILS %



CONFIDENTIAL

Appendix 6  
Day 42 Hematology Data  
Test period

Session 1 (Scheduled)  
Fexinidazole

Study Number: 0505-2007

| F e m a l e s |               |                 |           |                          |          |       |        |        |           |       |          |
|---------------|---------------|-----------------|-----------|--------------------------|----------|-------|--------|--------|-----------|-------|----------|
| Dose Level    | Animal Number | Group/ Subgroup | Study Day | RBC 10 <sup>6</sup> /mcL | HGB g/dL | HCT % | MCV fL | MCH pg | MCHC g/dL | RDW % | HDW g/dL |
| Vehicle       |               |                 |           |                          |          |       |        |        |           |       |          |
|               | 2575          | 1/1             | 42        | 6.86                     | 15.6     | 46.1  | 67.1   | 22.7   | 33.8      | 11.0  | 1.58     |
|               | 2577          | 1/1             | 42        | 6.74                     | 15.0     | 44.2  | 65.6   | 22.3   | 34.0      | 11.8  | 1.71     |
|               |               |                 | N         | 2                        | 2        | 2     | 2      | 2      | 2         | 2     | 2        |
|               |               |                 | Mean      | 6.80                     | 15.3     | 45.2  | 66.4   | 22.5   | 33.9      | 11.4  | 1.65     |
|               |               |                 | Sdev      | 0.085                    | 0.42     | 1.34  | 1.06   | 0.28   | 0.14      | 0.57  | 0.092    |
| 800 mg/kg/day |               |                 |           |                          |          |       |        |        |           |       |          |
|               | 2571          | 4/1             | 42        | 6.54                     | 14.2     | 41.9  | 63.9   | 21.7   | 33.9      | 12.0  | 1.78     |
|               | 2573          | 4/1             | 42        | 6.60                     | 14.7     | 44.4  | 67.3   | 22.3   | 33.2      | 12.0  | 1.71     |
|               |               |                 | N         | 2                        | 2        | 2     | 2      | 2      | 2         | 2     | 2        |
|               |               |                 | Mean      | 6.57                     | 14.5     | 43.2  | 65.6   | 22.0   | 33.6      | 12.0  | 1.75     |
|               |               |                 | Sdev      | 0.042                    | 0.35     | 1.77  | 2.40   | 0.42   | 0.49      | 0.00  | 0.049    |

RBC - RED BLOOD CELLS  
MCV - MEAN CORPUSCULAR VOLUME  
RDW - RED CELL DISTRIBUTION WIDTH

HGB - HEMOGLOBIN  
MCH - MEAN CORPUSCULAR HEMOGLOBIN  
HDW - HEMOGLOBIN DISTRIB. WIDTH

HCT - HEMATOCRIT  
MCHC - MEAN CORPUSCULAR HGB CONC.

CONFIDENTIAL

Appendix 6  
Day 42 Hematology Data  
Test period

Session 1 (Scheduled)  
Fexinidazole

Study Number: 0505-2007

| F e m a l e s |               |                 |           |      |                        |         |           |        |                          |        |       |
|---------------|---------------|-----------------|-----------|------|------------------------|---------|-----------|--------|--------------------------|--------|-------|
| Dose Level    | Animal Number | Group/ Subgroup | Study Day | R %  | RAB 10 <sup>9</sup> /L | MCVr fL | CHCM g/dL | CHr pg | PLT 10 <sup>3</sup> /mcL | MPV fL | PDW % |
| Vehicle       |               |                 |           |      |                        |         |           |        |                          |        |       |
|               | 2575          | 1/1             | 42        | 0.5  | 34.6                   | 84.1    | 29.4      | 24.6   | 458.                     | 9.0    | 51.7  |
|               | 2577          | 1/1             | 42        | 0.2  | 14.2                   | 86.9    | 28.9      | 25.0   | 304.                     | 8.9    | 50.1  |
|               |               |                 | N         | 2    | 2                      | 2       | 2         | 2      | 2                        | 2      | 2     |
|               |               |                 | Mean      | 0.4  | 24.4                   | 85.5    | 29.2      | 24.8   | 381.                     | 9.0    | 50.9  |
|               |               |                 | Sdev      | 0.21 | 14.42                  | 1.98    | 0.35      | 0.28   | 108.9                    | 0.07   | 1.13  |
| 800 mg/kg/day |               |                 |           |      |                        |         |           |        |                          |        |       |
|               | 2571          | 4/1             | 42        | 0.8  | 53.5                   | 85.8    | 28.4      | 24.3   | 335.                     | 8.9    | 54.3  |
|               | 2573          | 4/1             | 42        | 0.5  | 33.1                   | 90.4    | 29.0      | 26.1   | 332.                     | 9.0    | 55.7  |
|               |               |                 | N         | 2    | 2                      | 2       | 2         | 2      | 2                        | 2      | 2     |
|               |               |                 | Mean      | 0.7  | 43.3                   | 88.1    | 28.7      | 25.2   | 334.                     | 9.0    | 55.0  |
|               |               |                 | Sdev      | 0.23 | 14.42                  | 3.25    | 0.42      | 1.27   | 2.1                      | 0.07   | 0.99  |

R - RETICULOCYTES  
CHCM - MEAN HEMOGLOBIN CONC. RETIC.  
MPV - MEAN PLATELET VOLUME

RAB - RETICULOCYTES ABS  
CHr - CELLULAR HEMOGLOBIN RETIC.  
PDW - PLATELET DISTRIBUTION WIDTH

MCVr - MEAN CORPUSCOLAR VOL. RETIC.  
PLT - PLATELETS

CONFIDENTIAL

Appendix 6  
Day 42 Hematology Data  
Test period

Session 1 (Scheduled)  
Fexinidazole

Study Number: 0505-2007

F e m a l e s

| Dose Level    | Animal Number | Group/ Subgroup | Study Day | PCT % | WBC 10 <sup>3</sup> /mcL | NAB 10 <sup>3</sup> /mcL | LYAB 10 <sup>3</sup> /mcL | MAB 10 <sup>3</sup> /mcL | EAB 10 <sup>3</sup> /mcL | BAB 10 <sup>3</sup> /mcL |
|---------------|---------------|-----------------|-----------|-------|--------------------------|--------------------------|---------------------------|--------------------------|--------------------------|--------------------------|
| Vehicle       |               |                 |           |       |                          |                          |                           |                          |                          |                          |
|               | 2575          | 1/1             | 42        | 0.41  | 11.08                    | 5.94                     | 3.62                      | 0.69                     | 0.66                     | 0.09                     |
|               | 2577          | 1/1             | 42        | 0.27  | 7.94                     | 3.80                     | 3.31                      | 0.50                     | 0.21                     | 0.07                     |
|               |               |                 | N         | 2     | 2                        | 2                        | 2                         | 2                        | 2                        | 2                        |
|               |               |                 | Mean      | 0.34  | 9.51                     | 4.87                     | 3.47                      | 0.60                     | 0.44                     | 0.08                     |
|               |               |                 | Sdev      | 0.099 | 2.220                    | 1.513                    | 0.219                     | 0.134                    | 0.318                    | 0.014                    |
| 800 mg/kg/day |               |                 |           |       |                          |                          |                           |                          |                          |                          |
|               | 2571          | 4/1             | 42        | 0.30  | 6.97                     | 4.30                     | 2.15                      | 0.28                     | 0.14                     | 0.06                     |
|               | 2573          | 4/1             | 42        | 0.30  | 8.24                     | 4.87                     | 2.73                      | 0.30                     | 0.20                     | 0.07                     |
|               |               |                 | N         | 2     | 2                        | 2                        | 2                         | 2                        | 2                        | 2                        |
|               |               |                 | Mean      | 0.30  | 7.61                     | 4.59                     | 2.44                      | 0.29                     | 0.17                     | 0.07                     |
|               |               |                 | Sdev      | 0.000 | 0.898                    | 0.403                    | 0.410                     | 0.014                    | 0.042                    | 0.007                    |

PCT - PLATELET HEMATOCRIT  
LYAB - LYMPHOCYTES ABS  
BAB - BASOPHILS ABS

WBC - WHITE BLOOD CELLS  
MAB - MONOCYTES ABS

NAB - NEUTROPHILS ABS  
EAB - EOSINOPHILS ABS

CONFIDENTIAL

Appendix 6  
Day 42 Hematology Data  
Test period

Session 1 (Scheduled)  
Fexinidazole

Study Number: 0505-2007

| F e m a l e s |               |                 |           |                           |      |      |      |      |      |      |
|---------------|---------------|-----------------|-----------|---------------------------|------|------|------|------|------|------|
| Dose Level    | Animal Number | Group/ Subgroup | Study Day | LUAB 10 <sup>3</sup> /mcL | N %  | LY % | M %  | E %  | B %  | LU % |
| Vehicle       |               |                 |           |                           |      |      |      |      |      |      |
|               | 2575          | 1/1             | 42        | 0.09                      | 53.6 | 32.6 | 6.3  | 6.0  | 0.8  | 0.8  |
|               | 2577          | 1/1             | 42        | 0.05                      | 47.8 | 41.7 | 6.3  | 2.6  | 0.9  | 0.7  |
|               |               |                 | N         | 2                         | 2    | 2    | 2    | 2    | 2    | 2    |
|               |               |                 | Mean      | 0.07                      | 50.7 | 37.2 | 6.3  | 4.3  | 0.9  | 0.8  |
|               |               |                 | Sdev      | 0.028                     | 4.10 | 6.43 | 0.00 | 2.40 | 0.07 | 0.07 |
| 800 mg/kg/day |               |                 |           |                           |      |      |      |      |      |      |
|               | 2571          | 4/1             | 42        | 0.05                      | 61.7 | 30.8 | 4.0  | 2.1  | 0.8  | 0.7  |
|               | 2573          | 4/1             | 42        | 0.07                      | 59.1 | 33.2 | 3.6  | 2.4  | 0.9  | 0.8  |
|               |               |                 | N         | 2                         | 2    | 2    | 2    | 2    | 2    | 2    |
|               |               |                 | Mean      | 0.06                      | 60.4 | 32.0 | 3.8  | 2.3  | 0.9  | 0.8  |
|               |               |                 | Sdev      | 0.014                     | 1.84 | 1.70 | 0.28 | 0.21 | 0.07 | 0.07 |

LUAB - LARGE UNSTAINED CELLS ABS  
M - MONOCYTES %  
LU - LARGE UNSTAINED CELLS %

N - NEUTROPHILS %  
E - EOSINOPHILS %

LY - LYMPHOCITES %  
B - BASOPHILS %

## ***Appendix 7 Coagulation***

CONFIDENTIAL

Appendix 7  
Day -7 Hematology Data  
Pretest phase

Session 1 (Scheduled)  
Fexinidazole

Study Number: 0505-2007

| M a l e s     |               |                 |           |        |           |         |            |           |  |
|---------------|---------------|-----------------|-----------|--------|-----------|---------|------------|-----------|--|
| Dose Level    | Animal Number | Group/ Subgroup | Study Day | PT sec | PTr ratio | PTT sec | PTTr ratio | FIB mg/dL |  |
| Vehicle       |               |                 |           |        |           |         |            |           |  |
|               | 2516          | 1/1             | -7        | 7.3    | 1.0       | 12.7    | 1.0        | 213.      |  |
|               | 2518          | 1/1             | -7        | 6.9    | 1.0       | 12.4    | 1.0        | 222.      |  |
|               | 2520          | 1/1             | -7        | 6.9    | 1.0       | 12.4    | 1.0        | 216.      |  |
|               | 2527          | 1/1             | -7        | 7.0    | 1.0       | 12.7    | 1.0        | 215.      |  |
|               | 2533          | 1/1             | -7        | 8.0    | 1.1       | 12.2    | 1.0        | 179.      |  |
|               |               |                 | N         | 5      | 5         | 5       | 5          | 5         |  |
|               |               |                 | Mean      | 7.2    | 1.0       | 12.5    | 1.0        | 209.      |  |
|               |               |                 | Sdev      | 0.46   | 0.06      | 0.23    | 0.02       | 17.3      |  |
| 50 mg/kg/day  |               |                 |           |        |           |         |            |           |  |
|               | 2514          | 2/1             | -7        | 7.7    | 1.1       | 12.4    | 1.0        | 164.      |  |
|               | 2521          | 2/1             | -7        | 7.2    | 1.0       | 12.9    | 1.0        | 188.      |  |
|               | 2529          | 2/1             | -7        | 8.0    | 1.1       | 13.0    | 1.0        | 161.      |  |
|               |               |                 | N         | 3      | 3         | 3       | 3          | 3         |  |
|               |               |                 | Mean      | 7.6    | 1.0       | 12.8    | 1.0        | 171.      |  |
|               |               |                 | Sdev      | 0.36   | 0.05      | 0.31    | 0.03       | 14.8      |  |
| 200 mg/kg/day |               |                 |           |        |           |         |            |           |  |
|               | 2515          | 3/1             | -7        | 7.4    | 1.0       | 12.7    | 1.0        | 176.      |  |
|               | 2523          | 3/1             | -7        | 6.9    | 0.9       | 12.6    | 1.0        | 248.      |  |
|               | 2526          | 3/1             | -7        | 7.5    | 1.0       | 12.9    | 1.0        | 165.      |  |
|               |               |                 | N         | 3      | 3         | 3       | 3          | 3         |  |
|               |               |                 | Mean      | 7.2    | 1.0       | 12.7    | 1.0        | 196.      |  |
|               |               |                 | Sdev      | 0.31   | 0.04      | 0.18    | 0.01       | 45.2      |  |
| 800 mg/kg/day |               |                 |           |        |           |         |            |           |  |
|               | 2517          | 4/1             | -7        | 7.4    | 1.0       | 13.1    | 1.0        | 205.      |  |
|               | 2519          | 4/1             | -7        | 6.8    | 0.9       | 12.2    | 1.0        | 250.      |  |
|               | 2525          | 4/1             | -7        | 8.0    | 1.1       | 12.5    | 1.0        | 175.      |  |
|               | 2528          | 4/1             | -7        | 7.1    | 1.0       | 13.0    | 1.0        | 226.      |  |
|               | 2530          | 4/1             | -7        | 7.5    | 1.0       | 12.4    | 1.0        | 191.      |  |
|               |               |                 | N         | 5      | 5         | 5       | 5          | 5         |  |
|               |               |                 | Mean      | 7.4    | 1.0       | 12.6    | 1.0        | 209.      |  |
|               |               |                 | Sdev      | 0.46   | 0.06      | 0.37    | 0.03       | 29.2      |  |

PT - PROTHROMBIN TIME  
PTTr - ACT. PAR. THROMB. TIME RATIO

PTr - PROTHROMBIN TIME RATIO  
FIB - FIBRINOGEN

PTT - ACT. PAR. THROMB. TIME

CONFIDENTIAL

Appendix 7  
Day -7 Hematology Data  
Pretest phase

Session 1 (Scheduled)  
Fexinidazole

Study Number: 0505-2007

| F e m a l e s |               |                 |           |        |           |         |            |           |
|---------------|---------------|-----------------|-----------|--------|-----------|---------|------------|-----------|
| Dose Level    | Animal Number | Group/ Subgroup | Study Day | PT sec | PTr ratio | PTT sec | PTTr ratio | FIB mg/dL |
| Vehicle       |               |                 |           |        |           |         |            |           |
|               | 2560          | 1/1             | -7        | 7.0    | 1.0       | 12.9    | 1.0        | 217.      |
|               | 2568          | 1/1             | -7        | 9.5    | 1.3       | 69.7    | 5.5        | 163.      |
|               | 2572          | 1/1             | -7        | 7.1    | 1.0       | 12.8    | 1.0        | 189.      |
|               | 2575          | 1/1             | -7        | 7.6    | 1.0       | 12.6    | 1.0        | 179.      |
|               | 2577          | 1/1             | -7        | 7.8    | 1.1       | 12.8    | 1.0        | 166.      |
|               |               |                 | N         | 5      | 5         | 5       | 5          | 5         |
|               |               |                 | Mean      | 7.8    | 1.1       | 24.2    | 1.9        | 183.      |
|               |               |                 | Sdev      | 0.99   | 0.14      | 25.44   | 2.01       | 22.0      |
| 50 mg/kg/day  |               |                 |           |        |           |         |            |           |
|               | 2562          | 2/1             | -7        | 8.7    | 1.2       | 12.9    | 1.0        | 166.      |
|               | 2563          | 2/1             | -7        | 6.8    | 0.9       | 12.4    | 1.0        | 246.      |
|               | 2576          | 2/1             | -7        | 7.5    | 1.0       | 12.5    | 1.0        | 154.      |
|               |               |                 | N         | 3      | 3         | 3       | 3          | 3         |
|               |               |                 | Mean      | 7.7    | 1.1       | 12.6    | 1.0        | 188.      |
|               |               |                 | Sdev      | 0.99   | 0.14      | 0.31    | 0.02       | 50.2      |
| 200 mg/kg/day |               |                 |           |        |           |         |            |           |
|               | 2561          | 3/1             | -7        | 7.0    | 1.0       | 13.0    | 1.0        | 264.      |
|               | 2570          | 3/1             | -7        | 7.2    | 1.0       | 12.6    | 1.0        | 199.      |
|               | 2567          | 3/1             | -7        | 7.3    | 1.0       | 12.9    | 1.0        | 182.      |
|               |               |                 | N         | 3      | 3         | 3       | 3          | 3         |
|               |               |                 | Mean      | 7.2    | 1.0       | 12.8    | 1.0        | 215.      |
|               |               |                 | Sdev      | 0.15   | 0.02      | 0.24    | 0.02       | 43.0      |
| 800 mg/kg/day |               |                 |           |        |           |         |            |           |
|               | 2564          | 4/1             | -7        | 7.3    | 1.0       | 12.3    | 1.0        | 172.      |
|               | 2565          | 4/1             | -7        | 7.1    | 1.0       | 12.7    | 1.0        | 202.      |
|               | 2569          | 4/1             | -7        | 8.0    | 1.1       | 13.0    | 1.0        | 164.      |
|               | 2571          | 4/1             | -7        | 7.4    | 1.0       | 13.1    | 1.0        | 150.      |
|               | 2573          | 4/1             | -7        | 8.9    | 1.2       | 13.6    | 1.1        | 141.      |
|               |               |                 | N         | 5      | 5         | 5       | 5          | 5         |
|               |               |                 | Mean      | 7.8    | 1.1       | 12.9    | 1.0        | 166.      |
|               |               |                 | Sdev      | 0.75   | 0.10      | 0.47    | 0.04       | 23.5      |

PT - PROTHROMBIN TIME  
PTTr - ACT. PAR. THROMB. TIME RATIO

PTr - PROTHROMBIN TIME RATIO  
FIB - FIBRINOGEN

PTT - ACT. PAR. THROMB. TIME

CONFIDENTIAL

Appendix 7  
Day 28 Hematology Data  
Test period

Session 1 (Scheduled)  
Fexinidazole

Study Number: 0505-2007

| M a l e s     |               |                 |           |        |           |         |            |           |
|---------------|---------------|-----------------|-----------|--------|-----------|---------|------------|-----------|
| Dose Level    | Animal Number | Group/ Subgroup | Study Day | PT sec | PTr ratio | PTT sec | PTTr ratio | FIB mg/dL |
| Vehicle       |               |                 |           |        |           |         |            |           |
|               | 2516          | 1/1             | 28        | 7.4    | 1.0       | 12.4    | 1.0        | 197.      |
|               | 2518          | 1/1             | 28        | 7.0    | 1.0       | 12.2    | 1.0        | 224.      |
|               | 2520          | 1/1             | 28        | 6.9    | 1.0       | 12.5    | 1.0        | 227.      |
|               | 2527          | 1/1             | 28        | 7.2    | 1.0       | 12.7    | 1.0        | 216.      |
|               | 2533          | 1/1             | 28        | 7.7    | 1.1       | 12.4    | 1.0        | 235.      |
|               |               |                 | N         | 5      | 5         | 5       | 5          | 5         |
|               |               |                 | Mean      | 7.2    | 1.0       | 12.4    | 1.0        | 220.      |
|               |               |                 | Sdev      | 0.29   | 0.04      | 0.19    | 0.01       | 14.3      |
| 50 mg/kg/day  |               |                 |           |        |           |         |            |           |
|               | 2514          | 2/1             | 28        | 8.0    | 1.1       | 12.6    | 1.0        | 174.      |
|               | 2521          | 2/1             | 28        | 7.7    | 1.1       | 13.2    | 1.0        | 161.      |
|               | 2529          | 2/1             | 28        | 8.4    | 1.2       | 13.4    | 1.1        | 156.      |
|               |               |                 | N         | 3      | 3         | 3       | 3          | 3         |
|               |               |                 | Mean      | 8.0    | 1.1       | 13.1    | 1.0        | 164.      |
|               |               |                 | Sdev      | 0.34   | 0.05      | 0.40    | 0.03       | 9.3       |
| 200 mg/kg/day |               |                 |           |        |           |         |            |           |
|               | 2515          | 3/1             | 28        | 7.0    | 1.0       | 12.4    | 1.0        | 262.      |
|               | 2523          | 3/1             | 28        | 6.9    | 1.0       | 12.6    | 1.0        | 235.      |
|               | 2526          | 3/1             | 28        | 8.4    | 1.2       | 13.0    | 1.0        | 152.      |
|               |               |                 | N         | 3      | 3         | 3       | 3          | 3         |
|               |               |                 | Mean      | 7.4    | 1.0       | 12.7    | 1.0        | 216.      |
|               |               |                 | Sdev      | 0.87   | 0.12      | 0.29    | 0.03       | 57.0      |
| 800 mg/kg/day |               |                 |           |        |           |         |            |           |
|               | 2517          | 4/1             | 28        | 7.5    | 1.0       | 13.0    | 1.0        | 175.      |
|               | 2519          | 4/1             | 28        | 7.4    | 1.0       | 12.4    | 1.0        | 170.      |
|               | 2525          | 4/1             | 28        | 8.6    | 1.2       | 13.0    | 1.0        | 162.      |
|               | 2528          | 4/1             | 28        | 7.2    | 1.0       | 12.3    | 1.0        | 203.      |
|               | 2530          | 4/1             | 28        | 8.0    | 1.1       | 12.4    | 1.0        | 158.      |
|               |               |                 | N         | 5      | 5         | 5       | 5          | 5         |
|               |               |                 | Mean      | 7.7    | 1.1       | 12.6    | 1.0        | 173.      |
|               |               |                 | Sdev      | 0.56   | 0.08      | 0.32    | 0.03       | 17.9      |

PT - PROTHROMBIN TIME  
PTTr - ACT. PAR. THROMB. TIME RATIO

PTr - PROTHROMBIN TIME RATIO  
FIB - FIBRINOGEN

PTT - ACT. PAR. THROMB. TIME



CONFIDENTIAL

Appendix 7  
Day 28 Hematology Data  
Test period

Session 1 (Scheduled)  
Fexinidazole

Study Number: 0505-2007

| F e m a l e s |               |                |           |        |           |         |            |           |
|---------------|---------------|----------------|-----------|--------|-----------|---------|------------|-----------|
| Dose Level    | Animal Number | Group/Subgroup | Study Day | PT sec | PTr ratio | PTT sec | PTTr ratio | FIB mg/dL |
| Vehicle       |               |                |           |        |           |         |            |           |
|               | 2560          | 1/1            | 28        | 7.2    | 1.0       | 13.0    | 1.0        | 209.      |
|               | 2568          | 1/1            | 28        | 7.8    | 1.1       | 12.5    | 1.0        | 157.      |
|               | 2572          | 1/1            | 28        | 7.2    | 1.0       | 13.1    | 1.0        | 210.      |
|               | 2575          | 1/1            | 28        | 7.2    | 1.0       | 12.4    | 1.0        | 202.      |
|               | 2577          | 1/1            | 28        | 7.8    | 1.1       | 13.7    | 1.1        | 160.      |
|               |               |                | N         | 5      | 5         | 5       | 5          | 5         |
|               |               |                | Mean      | 7.4    | 1.0       | 12.9    | 1.0        | 188.      |
|               |               |                | Sdev      | 0.34   | 0.05      | 0.52    | 0.04       | 26.8      |
| 50 mg/kg/day  |               |                |           |        |           |         |            |           |
|               | 2562          | 2/1            | 28        | 8.0    | 1.1       | 12.4    | 1.0        | 176.      |
|               | 2563          | 2/1            | 28        | 7.0    | 1.0       | 12.6    | 1.0        | 204.      |
|               | 2576          | 2/1            | 28        | 7.3    | 1.0       | 12.5    | 1.0        | 202.      |
|               |               |                | N         | 3      | 3         | 3       | 3          | 3         |
|               |               |                | Mean      | 7.4    | 1.0       | 12.5    | 1.0        | 194.      |
|               |               |                | Sdev      | 0.49   | 0.07      | 0.10    | 0.01       | 15.3      |
| 200 mg/kg/day |               |                |           |        |           |         |            |           |
|               | 2561          | 3/1            | 28        | 7.5    | 1.0       | 12.5    | 1.0        | 175.      |
|               | 2570          | 3/1            | 28        | 7.3    | 1.0       | 12.5    | 1.0        | 181.      |
|               | 2567          | 3/1            | 28        | 6.9    | 0.9       | 12.4    | 1.0        | 283.      |
|               |               |                | N         | 3      | 3         | 3       | 3          | 3         |
|               |               |                | Mean      | 7.2    | 1.0       | 12.5    | 1.0        | 213.      |
|               |               |                | Sdev      | 0.31   | 0.04      | 0.06    | 0.01       | 60.8      |
| 800 mg/kg/day |               |                |           |        |           |         |            |           |
|               | 2564          | 4/1            | 28        | 7.3    | 1.0       | 12.7    | 1.0        | 206.      |
|               | 2565          | 4/1            | 28        | 7.1    | 1.0       | 12.9    | 1.0        | 218.      |
|               | 2569          | 4/1            | 28        | 8.4    | 1.2       | 12.6    | 1.0        | 162.      |
|               | 2571          | 4/1            | 28        | 7.4    | 1.0       | 12.8    | 1.0        | 170.      |
|               | 2573          | 4/1            | 28        | 7.8    | 1.1       | 12.6    | 1.0        | 165.      |
|               |               |                | N         | 5      | 5         | 5       | 5          | 5         |
|               |               |                | Mean      | 7.6    | 1.0       | 12.7    | 1.0        | 184.      |
|               |               |                | Sdev      | 0.52   | 0.07      | 0.10    | 0.01       | 25.9      |

PT - PROTHROMBIN TIME  
PTTr - ACT. PAR. THROMB. TIME RATIO

PTr - PROTHROMBIN TIME RATIO  
FIB - FIBRINOGEN

PTT - ACT. PAR. THROMB. TIME

CONFIDENTIAL

Appendix 7  
Day 42 Hematology Data  
Test period

Session 1 (Scheduled)  
Fexinidazole

Study Number: 0505-2007

| M a l e s     |               |                 |           |        |           |         |            |           |  |
|---------------|---------------|-----------------|-----------|--------|-----------|---------|------------|-----------|--|
| Dose Level    | Animal Number | Group/ Subgroup | Study Day | PT sec | Ptr ratio | PTT sec | PTTr ratio | FIB mg/dL |  |
| Vehicle       |               |                 |           |        |           |         |            |           |  |
|               | 2527          | 1/1             | 42        | 7.3    | 1.0       | 12.8    | 1.0        | 223.      |  |
|               | 2533          | 1/1             | 42        | 8.3    | 1.1       | 12.4    | 1.0        | 207.      |  |
|               |               |                 | N         | 2      | 2         | 2       | 2          | 2         |  |
|               |               |                 | Mean      | 7.8    | 1.1       | 12.6    | 1.0        | 215.      |  |
|               |               |                 | Sdev      | 0.74   | 0.10      | 0.28    | 0.02       | 11.0      |  |
| 800 mg/kg/day |               |                 |           |        |           |         |            |           |  |
|               | 2528          | 4/1             | 42        | 7.9    | 1.1       | 12.6    | 1.0        | 165.      |  |
|               | 2530          | 4/1             | 42        | 8.0    | 1.1       | 12.2    | 1.0        | 215.      |  |
|               |               |                 | N         | 2      | 2         | 2       | 2          | 2         |  |
|               |               |                 | Mean      | 7.9    | 1.1       | 12.4    | 1.0        | 190.      |  |
|               |               |                 | Sdev      | 0.05   | 0.01      | 0.28    | 0.03       | 35.6      |  |

PT - PROTHROMBIN TIME  
PTTr - ACT. PAR. THROMB. TIME RATIO

Ptr - PROTHROMBIN TIME RATIO  
FIB - FIBRINOGEN

PTT - ACT. PAR. THROMB. TIME

CONFIDENTIAL

Appendix 7  
Day 42 Hematology Data  
Test period

Session 1 (Scheduled)  
Fexinidazole

Study Number: 0505-2007

| F e m a l e s |               |                 |           |        |           |         |            |           |  |
|---------------|---------------|-----------------|-----------|--------|-----------|---------|------------|-----------|--|
| Dose Level    | Animal Number | Group/ Subgroup | Study Day | PT sec | PTr ratio | PTT sec | PTTr ratio | FIB mg/dL |  |
| Vehicle       |               |                 |           |        |           |         |            |           |  |
|               | 2575          | 1/1             | 42        | 7.4    | 1.0       | 12.5    | 1.0        | 167.      |  |
|               | 2577          | 1/1             | 42        | 7.6    | 1.1       | 12.4    | 1.0        | 167.      |  |
|               |               |                 | N         | 2      | 2         | 2       | 2          | 2         |  |
|               |               |                 | Mean      | 7.5    | 1.0       | 12.4    | 1.0        | 167.      |  |
|               |               |                 | Sdev      | 0.17   | 0.03      | 0.06    | 0.00       | 0.4       |  |
| 800 mg/kg/day |               |                 |           |        |           |         |            |           |  |
|               | 2571          | 4/1             | 42        | 7.1    | 1.0       | 12.2    | 1.0        | 201.      |  |
|               | 2573          | 4/1             | 42        | 8.0    | 1.1       | 12.5    | 1.0        | 174.      |  |
|               |               |                 | N         | 2      | 2         | 2       | 2          | 2         |  |
|               |               |                 | Mean      | 7.6    | 1.0       | 12.3    | 1.0        | 188.      |  |
|               |               |                 | Sdev      | 0.59   | 0.08      | 0.24    | 0.02       | 19.6      |  |

PT - PROTHROMBIN TIME  
PTTr - ACT. PAR. THROMB. TIME RATIO

PTr - PROTHROMBIN TIME RATIO  
FIB - FIBRINOGEN

PTT - ACT. PAR. THROMB. TIME

## ***Appendix 8 Clinical Chemistry***

CONFIDENTIAL

Appendix 8  
Day -7 Clinical Chemistry Data  
Pretest phase

Session 1 (Scheduled)  
Fexinidazole

Study Number: 0505-2007

| M a l e s     |               |                 |           |            |            |          |          |         |          |            |
|---------------|---------------|-----------------|-----------|------------|------------|----------|----------|---------|----------|------------|
| Dose Level    | Animal Number | Group/ Subgroup | Study Day | UREA mg/dL | CREA mg/dL | AST IU/L | ALT IU/L | AP IU/L | GGT IU/L | TBIL mg/dL |
| Vehicle       |               |                 |           |            |            |          |          |         |          |            |
|               | 2516          | 1/1             | -7        | 24.        | 0.86       | 35.      | 39.      | 84.     | 6.       | 0.09       |
|               | 2518          | 1/1             | -7        | 26.        | 0.92       | 38.      | 39.      | 114.    | 5.       | 0.13       |
|               | 2520          | 1/1             | -7        | 29.        | 0.83       | 28.      | 21.      | 55.     | 6.       | 0.08       |
|               | 2527          | 1/1             | -7        | 38.        | 0.94       | 44.      | 26.      | 72.     | 7.       | 0.09       |
|               | 2533          | 1/1             | -7        | 31.        | 1.00       | 50.      | 38.      | 63.     | 8.       | 0.11       |
|               |               |                 | N         | 5          | 5          | 5        | 5        | 5       | 5        | 5          |
|               |               |                 | Mean      | 30.        | 0.91       | 39.      | 33.      | 78.     | 6.       | 0.10       |
|               |               |                 | Sdev      | 5.4        | 0.067      | 8.4      | 8.5      | 23.0    | 1.1      | 0.020      |
| 50 mg/kg/day  |               |                 |           |            |            |          |          |         |          |            |
|               | 2514          | 2/1             | -7        | 18.        | 0.94       | 28.      | 31.      | 79.     | 8.       | 0.09       |
|               | 2521          | 2/1             | -7        | 23.        | 0.81       | 33.      | 30.      | 67.     | 7.       | 0.13       |
|               | 2529          | 2/1             | -7        | 22.        | 0.87       | 39.      | 30.      | 87.     | 10.      | 0.13       |
|               |               |                 | N         | 3          | 3          | 3        | 3        | 3       | 3        | 3          |
|               |               |                 | Mean      | 21.        | 0.87       | 33.      | 30.      | 78.     | 8.       | 0.12       |
|               |               |                 | Sdev      | 2.6        | 0.065      | 5.5      | 0.6      | 10.1    | 1.5      | 0.023      |
| 200 mg/kg/day |               |                 |           |            |            |          |          |         |          |            |
|               | 2515          | 3/1             | -7        | 22.        | 0.91       | 34.      | 36.      | 89.     | 11.      | 0.10       |
|               | 2523          | 3/1             | -7        | 25.        | 0.85       | 46.      | 36.      | 51.     | 8.       | 0.24       |
|               | 2526          | 3/1             | -7        | 22.        | 0.83       | 25.      | 22.      | 94.     | 5.       | 0.11       |
|               |               |                 | N         | 3          | 3          | 3        | 3        | 3       | 3        | 3          |
|               |               |                 | Mean      | 23.        | 0.86       | 35.      | 31.      | 78.     | 8.       | 0.15       |
|               |               |                 | Sdev      | 1.7        | 0.042      | 10.5     | 8.1      | 23.5    | 3.0      | 0.078      |
| 800 mg/kg/day |               |                 |           |            |            |          |          |         |          |            |
|               | 2517          | 4/1             | -7        | 26.        | 0.80       | 30.      | 36.      | 67.     | 9.       | 0.09       |
|               | 2519          | 4/1             | -7        | 23.        | 0.92       | 33.      | 24.      | 93.     | 6.       | 0.10       |
|               | 2525          | 4/1             | -7        | 23.        | 0.90       | 34.      | 26.      | 84.     | 8.       | 0.09       |
|               | 2528          | 4/1             | -7        | 28.        | 0.85       | 45.      | 35.      | 74.     | 9.       | 0.10       |
|               | 2530          | 4/1             | -7        | 20.        | 0.90       | 48.      | 37.      | 49.     | 5.       | 0.09       |
|               |               |                 | N         | 5          | 5          | 5        | 5        | 5       | 5        | 5          |
|               |               |                 | Mean      | 24.        | 0.87       | 38.      | 32.      | 73.     | 7.       | 0.09       |
|               |               |                 | Sdev      | 3.1        | 0.049      | 8.0      | 6.1      | 16.8    | 1.8      | 0.005      |

UREA - UREA  
ALT - ALANINE AMINO TRANSFERASE  
TBIL - TOTAL BILIRUBIN

CREA - CREATININE  
AP - ALKALINE PHOSPHATASE

AST - ASPARTATE AMINO TRANSFERASE  
GGT - GAMMA GLUTAMYL TRANSFERASE

CONFIDENTIAL

Appendix 8  
Day -7 Clinical Chemistry Data  
Pretest phase

Session 1 (Scheduled)  
Fexinidazole

Study Number: 0505-2007

| M a l e s     |               |                 |           |           |          |           |            |          |            |  |
|---------------|---------------|-----------------|-----------|-----------|----------|-----------|------------|----------|------------|--|
| Dose Level    | Animal Number | Group/ Subgroup | Study Day | TPRO g/dL | ALB g/dL | GLOB g/dL | GLUC mg/dL | TG mg/dL | TCHO mg/dL |  |
| Vehicle       |               |                 |           |           |          |           |            |          |            |  |
|               | 2516          | 1/1             | -7        | 5.6       | 2.74     | 2.9       | 85.        | 19.      | 112.       |  |
|               | 2518          | 1/1             | -7        | 6.1       | 3.03     | 3.1       | 90.        | 17.      | 146.       |  |
|               | 2520          | 1/1             | -7        | 6.0       | 2.85     | 3.2       | 88.        | 9.       | 101.       |  |
|               | 2527          | 1/1             | -7        | 6.1       | 2.62     | 3.5       | 86.        | 23.      | 147.       |  |
|               | 2533          | 1/1             | -7        | 5.8       | 2.77     | 3.0       | 88.        | 23.      | 116.       |  |
|               |               |                 | N         | 5         | 5        | 5         | 5          | 5        | 5          |  |
|               |               |                 | Mean      | 5.9       | 2.80     | 3.1       | 87.        | 18.      | 124.       |  |
|               |               |                 | Sdev      | 0.22      | 0.152    | 0.23      | 1.9        | 5.8      | 20.9       |  |
| 50 mg/kg/day  |               |                 |           |           |          |           |            |          |            |  |
|               | 2514          | 2/1             | -7        | 5.6       | 2.90     | 2.7       | 90.        | 8.       | 98.        |  |
|               | 2521          | 2/1             | -7        | 5.8       | 2.88     | 2.9       | 86.        | 35.      | 148.       |  |
|               | 2529          | 2/1             | -7        | 6.1       | 3.07     | 3.0       | 96.        | 24.      | 128.       |  |
|               |               |                 | N         | 3         | 3        | 3         | 3          | 3        | 3          |  |
|               |               |                 | Mean      | 5.8       | 2.95     | 2.9       | 91.        | 22.      | 125.       |  |
|               |               |                 | Sdev      | 0.25      | 0.104    | 0.17      | 5.0        | 13.6     | 25.2       |  |
| 200 mg/kg/day |               |                 |           |           |          |           |            |          |            |  |
|               | 2515          | 3/1             | -7        | 6.1       | 3.12     | 3.0       | 89.        | 17.      | 134.       |  |
|               | 2523          | 3/1             | -7        | 6.1       | 2.62     | 3.5       | 95.        | 22.      | 109.       |  |
|               | 2526          | 3/1             | -7        | 6.1       | 2.79     | 3.3       | 92.        | 14.      | 123.       |  |
|               |               |                 | N         | 3         | 3        | 3         | 3          | 3        | 3          |  |
|               |               |                 | Mean      | 6.1       | 2.84     | 3.3       | 92.        | 18.      | 122.       |  |
|               |               |                 | Sdev      | 0.00      | 0.254    | 0.25      | 3.0        | 4.0      | 12.5       |  |
| 800 mg/kg/day |               |                 |           |           |          |           |            |          |            |  |
|               | 2517          | 4/1             | -7        | 6.4       | 3.10     | 3.3       | 88.        | 8.       | 141.       |  |
|               | 2519          | 4/1             | -7        | 6.5       | 2.99     | 3.5       | 90.        | 12.      | 108.       |  |
|               | 2525          | 4/1             | -7        | 6.2       | 3.00     | 3.2       | 93.        | 20.      | 137.       |  |
|               | 2528          | 4/1             | -7        | 5.8       | 2.79     | 3.0       | 90.        | 18.      | 105.       |  |
|               | 2530          | 4/1             | -7        | 5.9       | 2.85     | 3.1       | 111.       | 10.      | 94.        |  |
|               |               |                 | N         | 5         | 5        | 5         | 5          | 5        | 5          |  |
|               |               |                 | Mean      | 6.2       | 2.95     | 3.2       | 94.        | 14.      | 117.       |  |
|               |               |                 | Sdev      | 0.30      | 0.125    | 0.20      | 9.4        | 5.2      | 20.8       |  |

TPRO - TOTAL PROTEIN  
GLUC - GLUCOSE

ALB - ALBUMIN  
TG - TRIGLYCERIDES

GLOB - GLOBULIN  
TCHO - TOTAL CHOLESTEROL

CONFIDENTIAL

Appendix 8  
Day -7 Clinical Chemistry Data  
Pretest phase

Session 1 (Scheduled)  
Fexinidazole

Study Number: 0505-2007

| M a l e s     |               |                 |           |          |            |      |          |         |          |  |
|---------------|---------------|-----------------|-----------|----------|------------|------|----------|---------|----------|--|
| Dose Level    | Animal Number | Group/ Subgroup | Study Day | CA mg/dL | PHOS mg/dL | AG   | NA mEq/L | K mEq/L | CL mEq/L |  |
| Vehicle       |               |                 |           |          |            |      |          |         |          |  |
|               | 2516          | 1/1             | -7        | 10.6     | 5.5        | 1.0  | 140.0    | 5.0     | 109.0    |  |
|               | 2518          | 1/1             | -7        | 10.9     | 4.7        | 1.0  | 142.0    | 4.5     | 110.0    |  |
|               | 2520          | 1/1             | -7        | 11.0     | 4.6        | 0.9  | 140.0    | 4.6     | 109.0    |  |
|               | 2527          | 1/1             | -7        | 11.4     | 5.2        | 0.8  | 141.0    | 4.6     | 107.0    |  |
|               | 2533          | 1/1             | -7        | 10.2     | 5.0        | 0.9  | 143.0    | 4.6     | 111.0    |  |
|               |               |                 | N         | 5        | 5          | 5    | 5        | 5       | 5        |  |
|               |               |                 | Mean      | 10.8     | 5.0        | 0.9  | 141.2    | 4.7     | 109.2    |  |
|               |               |                 | Sdev      | 0.45     | 0.37       | 0.09 | 1.30     | 0.18    | 1.48     |  |
| 50 mg/kg/day  |               |                 |           |          |            |      |          |         |          |  |
|               | 2514          | 2/1             | -7        | 11.0     | 4.9        | 1.1  | 143.0    | 4.8     | 110.0    |  |
|               | 2521          | 2/1             | -7        | 10.7     | 5.0        | 1.0  | 142.0    | 4.4     | 108.0    |  |
|               | 2529          | 2/1             | -7        | 10.2     | 4.4        | 1.0  | 142.0    | 4.8     | 109.0    |  |
|               |               |                 | N         | 3        | 3          | 3    | 3        | 3       | 3        |  |
|               |               |                 | Mean      | 10.6     | 4.8        | 1.0  | 142.3    | 4.7     | 109.0    |  |
|               |               |                 | Sdev      | 0.40     | 0.32       | 0.04 | 0.58     | 0.25    | 1.00     |  |
| 200 mg/kg/day |               |                 |           |          |            |      |          |         |          |  |
|               | 2515          | 3/1             | -7        | 11.4     | 4.5        | 1.0  | 143.0    | 4.6     | 108.0    |  |
|               | 2523          | 3/1             | -7        | 10.1     | 3.8        | 0.8  | 143.0    | 4.7     | 114.0    |  |
|               | 2526          | 3/1             | -7        | 11.0     | 4.4        | 0.8  | 139.0    | 4.6     | 108.0    |  |
|               |               |                 | N         | 3        | 3          | 3    | 3        | 3       | 3        |  |
|               |               |                 | Mean      | 10.8     | 4.2        | 0.9  | 141.7    | 4.6     | 110.0    |  |
|               |               |                 | Sdev      | 0.67     | 0.38       | 0.15 | 2.31     | 0.08    | 3.46     |  |
| 800 mg/kg/day |               |                 |           |          |            |      |          |         |          |  |
|               | 2517          | 4/1             | -7        | 10.9     | 4.2        | 0.9  | 142.0    | 4.8     | 108.0    |  |
|               | 2519          | 4/1             | -7        | 11.0     | 5.2        | 0.9  | 142.0    | 4.5     | 109.0    |  |
|               | 2525          | 4/1             | -7        | 11.1     | 5.1        | 0.9  | 140.0    | 4.6     | 108.0    |  |
|               | 2528          | 4/1             | -7        | 10.4     | 4.7        | 0.9  | 141.0    | 4.7     | 111.0    |  |
|               | 2530          | 4/1             | -7        | 10.3     | 4.5        | 0.9  | 142.0    | 4.5     | 113.0    |  |
|               |               |                 | N         | 5        | 5          | 5    | 5        | 5       | 5        |  |
|               |               |                 | Mean      | 10.7     | 4.7        | 0.9  | 141.4    | 4.6     | 109.8    |  |
|               |               |                 | Sdev      | 0.36     | 0.42       | 0.04 | 0.89     | 0.14    | 2.17     |  |

CA - CALCIUM  
NA - SODIUM

PHOS - PHOSPHOROUS  
K - POTASSIUM

AG - ALBUMIN/GLOBULIN  
CL - CHLORIDE

CONFIDENTIAL

Appendix 8  
Day -7 Clinical Chemistry Data  
Pretest phase

Session 1 (Scheduled)  
Fexinidazole

Study Number: 0505-2007

| F e m a l e s |               |                 |           |            |            |          |          |         |          |            |
|---------------|---------------|-----------------|-----------|------------|------------|----------|----------|---------|----------|------------|
| Dose Level    | Animal Number | Group/ Subgroup | Study Day | UREA mg/dL | CREA mg/dL | AST IU/L | ALT IU/L | AP IU/L | GGT IU/L | TBIL mg/dL |
| Vehicle       |               |                 |           |            |            |          |          |         |          |            |
|               | 2560          | 1/1             | -7        | 26.        | 0.78       | 39.      | 28.      | 46.     | 11.      | 0.10       |
|               | 2568          | 1/1             | -7        | 29.        | 0.79       | 54.      | 31.      | 53.     | 6.       | 0.25       |
|               | 2572          | 1/1             | -7        | 24.        | 0.81       | 39.      | 25.      | 51.     | 8.       | 0.12       |
|               | 2575          | 1/1             | -7        | 29.        | 0.71       | 37.      | 28.      | 87.     | 9.       | 0.13       |
|               | 2577          | 1/1             | -7        | 23.        | 1.01       | 34.      | 31.      | 50.     | 7.       | 0.12       |
|               |               |                 | N         | 5          | 5          | 5        | 5        | 5       | 5        | 5          |
|               |               |                 | Mean      | 26.        | 0.82       | 41.      | 29.      | 57.     | 8.       | 0.14       |
|               |               |                 | Sdev      | 2.8        | 0.113      | 7.8      | 2.5      | 16.7    | 1.9      | 0.060      |
| 50 mg/kg/day  |               |                 |           |            |            |          |          |         |          |            |
|               | 2562          | 2/1             | -7        | 30.        | 0.79       | 38.      | 30.      | 77.     | 11.      | 0.21       |
|               | 2563          | 2/1             | -7        | 26.        | 0.86       | 32.      | 20.      | 54.     | 10.      | 0.11       |
|               | 2576          | 2/1             | -7        | 37.        | 0.88       | 41.      | 38.      | 78.     | 8.       | 0.10       |
|               |               |                 | N         | 3          | 3          | 3        | 3        | 3       | 3        | 3          |
|               |               |                 | Mean      | 31.        | 0.84       | 37.      | 29.      | 70.     | 10.      | 0.14       |
|               |               |                 | Sdev      | 5.6        | 0.047      | 4.6      | 9.0      | 13.6    | 1.5      | 0.061      |
| 200 mg/kg/day |               |                 |           |            |            |          |          |         |          |            |
|               | 2561          | 3/1             | -7        | 32.        | 0.73       | 28.      | 21.      | 52.     | 7.       | 0.12       |
|               | 2570          | 3/1             | -7        | 30.        | 0.79       | 41.      | 25.      | 72.     | 7.       | 0.12       |
|               | 2567          | 3/1             | -7        | 23.        | 0.79       | 39.      | 24.      | 81.     | 8.       | 0.13       |
|               |               |                 | N         | 3          | 3          | 3        | 3        | 3       | 3        | 3          |
|               |               |                 | Mean      | 28.        | 0.77       | 36.      | 23.      | 68.     | 7.       | 0.12       |
|               |               |                 | Sdev      | 4.7        | 0.035      | 7.0      | 2.1      | 14.8    | 0.6      | 0.006      |
| 800 mg/kg/day |               |                 |           |            |            |          |          |         |          |            |
|               | 2564          | 4/1             | -7        | 28.        | 0.92       | 38.      | 28.      | 47.     | 8.       | 0.13       |
|               | 2565          | 4/1             | -7        | 46.        | 0.84       | 29.      | 23.      | 51.     | 8.       | 0.21       |
|               | 2569          | 4/1             | -7        | 30.        | 1.02       | 39.      | 36.      | 74.     | 7.       | 0.12       |
|               | 2571          | 4/1             | -7        | 28.        | 0.88       | 35.      | 39.      | 94.     | 8.       | 0.15       |
|               | 2573          | 4/1             | -7        | 24.        | 0.80       | 28.      | 25.      | 46.     | 8.       | 0.20       |
|               |               |                 | N         | 5          | 5          | 5        | 5        | 5       | 5        | 5          |
|               |               |                 | Mean      | 31.        | 0.89       | 34.      | 30.      | 62.     | 8.       | 0.16       |
|               |               |                 | Sdev      | 8.6        | 0.084      | 5.1      | 7.0      | 21.0    | 0.4      | 0.041      |

UREA - UREA  
ALT - ALANINE AMINO TRANSFERASE  
TBIL - TOTAL BILIRUBIN

CREA - CREATININE  
AP - ALKALINE PHOSPHATASE

AST - ASPARTATE AMINO TRANSFERASE  
GGT - GAMMA GLUTAMYL TRANSFERASE



CONFIDENTIAL

Appendix 8  
Day -7 Clinical Chemistry Data  
Pretest phase

Session 1 (Scheduled)  
Fexinidazole

Study Number: 0505-2007

| F e m a l e s |               |                 |           |           |          |           |            |          |            |  |
|---------------|---------------|-----------------|-----------|-----------|----------|-----------|------------|----------|------------|--|
| Dose Level    | Animal Number | Group/ Subgroup | Study Day | TPRO g/dL | ALB g/dL | GLOB g/dL | GLUC mg/dL | TG mg/dL | TCHO mg/dL |  |
| Vehicle       |               |                 |           |           |          |           |            |          |            |  |
|               | 2560          | 1/1             | -7        | 5.8       | 2.57     | 3.2       | 79.        | 16.      | 109.       |  |
|               | 2568          | 1/1             | -7        | 5.9       | 3.03     | 2.9       | 96.        | 11.      | 108.       |  |
|               | 2572          | 1/1             | -7        | 5.6       | 2.95     | 2.7       | 104.       | 14.      | 111.       |  |
|               | 2575          | 1/1             | -7        | 6.1       | 2.89     | 3.2       | 86.        | 19.      | 130.       |  |
|               | 2577          | 1/1             | -7        | 5.5       | 2.89     | 2.6       | 116.       | 10.      | 102.       |  |
|               |               |                 | N         | 5         | 5        | 5         | 5          | 5        | 5          |  |
|               |               |                 | Mean      | 5.8       | 2.87     | 2.9       | 96.        | 14.      | 112.       |  |
|               |               |                 | Sdev      | 0.24      | 0.175    | 0.30      | 14.6       | 3.7      | 10.6       |  |
| 50 mg/kg/day  |               |                 |           |           |          |           |            |          |            |  |
|               | 2562          | 2/1             | -7        | 5.8       | 3.09     | 2.7       | 66.        | 34.      | 116.       |  |
|               | 2563          | 2/1             | -7        | 5.8       | 2.58     | 3.2       | 104.       | 38.      | 170.       |  |
|               | 2576          | 2/1             | -7        | 5.8       | 2.98     | 2.8       | 93.        | 18.      | 122.       |  |
|               |               |                 | N         | 3         | 3        | 3         | 3          | 3        | 3          |  |
|               |               |                 | Mean      | 5.8       | 2.88     | 2.9       | 88.        | 30.      | 136.       |  |
|               |               |                 | Sdev      | 0.00      | 0.268    | 0.27      | 19.6       | 10.6     | 29.6       |  |
| 200 mg/kg/day |               |                 |           |           |          |           |            |          |            |  |
|               | 2561          | 3/1             | -7        | 6.1       | 2.90     | 3.2       | 90.        | 28.      | 128.       |  |
|               | 2570          | 3/1             | -7        | 6.0       | 3.08     | 2.9       | 112.       | 17.      | 132.       |  |
|               | 2567          | 3/1             | -7        | 5.7       | 2.77     | 2.9       | 93.        | 21.      | 132.       |  |
|               |               |                 | N         | 3         | 3        | 3         | 3          | 3        | 3          |  |
|               |               |                 | Mean      | 5.9       | 2.92     | 3.0       | 98.        | 22.      | 131.       |  |
|               |               |                 | Sdev      | 0.21      | 0.156    | 0.16      | 11.9       | 5.6      | 2.3        |  |
| 800 mg/kg/day |               |                 |           |           |          |           |            |          |            |  |
|               | 2564          | 4/1             | -7        | 5.9       | 2.74     | 3.2       | 106.       | 18.      | 148.       |  |
|               | 2565          | 4/1             | -7        | 6.1       | 2.79     | 3.3       | 99.        | 20.      | 156.       |  |
|               | 2569          | 4/1             | -7        | 5.6       | 2.99     | 2.6       | 108.       | 12.      | 104.       |  |
|               | 2571          | 4/1             | -7        | 5.7       | 3.01     | 2.7       | 95.        | 32.      | 145.       |  |
|               | 2573          | 4/1             | -7        | 6.0       | 2.98     | 3.0       | 94.        | 22.      | 120.       |  |
|               |               |                 | N         | 5         | 5        | 5         | 5          | 5        | 5          |  |
|               |               |                 | Mean      | 5.9       | 2.90     | 3.0       | 100.       | 21.      | 135.       |  |
|               |               |                 | Sdev      | 0.21      | 0.127    | 0.30      | 6.3        | 7.3      | 21.8       |  |

TPRO - TOTAL PROTEIN  
GLUC - GLUCOSE

ALB - ALBUMIN  
TG - TRIGLYCERIDES

GLOB - GLOBULIN  
TCHO - TOTAL CHOLESTEROL

CONFIDENTIAL

Appendix 8  
Day -7 Clinical Chemistry Data  
Pretest phase

Session 1 (Scheduled)  
Fexinidazole

Study Number: 0505-2007

| F e m a l e s |               |                 |           |          |            |      |          |         |          |  |
|---------------|---------------|-----------------|-----------|----------|------------|------|----------|---------|----------|--|
| Dose Level    | Animal Number | Group/ Subgroup | Study Day | CA mg/dL | PHOS mg/dL | AG   | NA mEq/L | K mEq/L | CL mEq/L |  |
| Vehicle       |               |                 |           |          |            |      |          |         |          |  |
|               | 2560          | 1/1             | -7        | 10.1     | 4.2        | 0.8  | 140.0    | 4.5     | 110.0    |  |
|               | 2568          | 1/1             | -7        | 10.7     | 4.9        | 1.1  | 140.0    | 4.2     | 109.0    |  |
|               | 2572          | 1/1             | -7        | 10.4     | 3.6        | 1.1  | 143.0    | 4.3     | 108.0    |  |
|               | 2575          | 1/1             | -7        | 10.5     | 5.1        | 0.9  | 142.0    | 4.6     | 106.0    |  |
|               | 2577          | 1/1             | -7        | 10.5     | 4.4        | 1.1  | 144.0    | 4.1     | 107.0    |  |
|               |               |                 | N         | 5        | 5          | 5    | 5        | 5       | 5        |  |
|               |               |                 | Mean      | 10.4     | 4.4        | 1.0  | 141.8    | 4.3     | 108.0    |  |
|               |               |                 | Sdev      | 0.22     | 0.59       | 0.14 | 1.79     | 0.20    | 1.58     |  |
| 50 mg/kg/day  |               |                 |           |          |            |      |          |         |          |  |
|               | 2562          | 2/1             | -7        | 10.7     | 5.0        | 1.1  | 142.0    | 4.7     | 106.0    |  |
|               | 2563          | 2/1             | -7        | 10.7     | 4.9        | 0.8  | 142.0    | 4.7     | 105.0    |  |
|               | 2576          | 2/1             | -7        | 10.7     | 4.7        | 1.1  | 144.0    | 4.6     | 107.0    |  |
|               |               |                 | N         | 3        | 3          | 3    | 3        | 3       | 3        |  |
|               |               |                 | Mean      | 10.7     | 4.9        | 1.0  | 142.7    | 4.7     | 106.0    |  |
|               |               |                 | Sdev      | 0.00     | 0.15       | 0.18 | 1.15     | 0.10    | 1.00     |  |
| 200 mg/kg/day |               |                 |           |          |            |      |          |         |          |  |
|               | 2561          | 3/1             | -7        | 10.7     | 4.7        | 0.9  | 142.0    | 4.7     | 108.0    |  |
|               | 2570          | 3/1             | -7        | 10.8     | 4.7        | 1.1  | 144.0    | 4.3     | 109.0    |  |
|               | 2567          | 3/1             | -7        | 10.2     | 4.4        | 0.9  | 140.0    | 4.1     | 107.0    |  |
|               |               |                 | N         | 3        | 3          | 3    | 3        | 3       | 3        |  |
|               |               |                 | Mean      | 10.6     | 4.6        | 1.0  | 142.0    | 4.4     | 108.0    |  |
|               |               |                 | Sdev      | 0.32     | 0.17       | 0.08 | 2.00     | 0.27    | 1.00     |  |
| 800 mg/kg/day |               |                 |           |          |            |      |          |         |          |  |
|               | 2564          | 4/1             | -7        | 10.9     | 5.5        | 0.9  | 143.0    | 4.4     | 107.0    |  |
|               | 2565          | 4/1             | -7        | 11.3     | 5.1        | 0.8  | 144.0    | 4.1     | 102.0    |  |
|               | 2569          | 4/1             | -7        | 10.7     | 3.6        | 1.1  | 142.0    | 4.4     | 110.0    |  |
|               | 2571          | 4/1             | -7        | 10.8     | 3.7        | 1.1  | 144.0    | 4.6     | 108.0    |  |
|               | 2573          | 4/1             | -7        | 10.8     | 4.7        | 1.0  | 142.0    | 4.4     | 105.0    |  |
|               |               |                 | N         | 5        | 5          | 5    | 5        | 5       | 5        |  |
|               |               |                 | Mean      | 10.9     | 4.5        | 1.0  | 143.0    | 4.4     | 106.4    |  |
|               |               |                 | Sdev      | 0.23     | 0.84       | 0.14 | 1.00     | 0.16    | 3.05     |  |

CA - CALCIUM  
NA - SODIUM

PHOS - PHOSPHOROUS  
K - POTASSIUM

AG - ALBUMIN/GLOBULIN  
CL - CHLORIDE

CONFIDENTIAL

Appendix 8  
Day 28 Clinical Chemistry Data  
Test period

Session 1 (Scheduled)  
Fexinidazole

Study Number: 0505-2007

| M a l e s     |               |                 |           |            |            |          |          |         |          |            |
|---------------|---------------|-----------------|-----------|------------|------------|----------|----------|---------|----------|------------|
| Dose Level    | Animal Number | Group/ Subgroup | Study Day | UREA mg/dL | CREA mg/dL | AST IU/L | ALT IU/L | AP IU/L | GGT IU/L | TBIL mg/dL |
| Vehicle       |               |                 |           |            |            |          |          |         |          |            |
|               | 2516          | 1/1             | 28        | 28.        | 0.90       | 33.      | 50.      | 72.     | 3.       | 0.30       |
|               | 2518          | 1/1             | 28        | 31.        | 0.81       | 46.      | 57.      | 80.     | 6.       | 0.24       |
|               | 2520          | 1/1             | 28        | 30.        | 0.95       | 29.      | 26.      | 57.     | 2.       | 0.27       |
|               | 2527          | 1/1             | 28        | 28.        | 0.88       | 37.      | 32.      | 66.     | 2.       | 0.21       |
|               | 2533          | 1/1             | 28        | 31.        | 0.95       | 41.      | 38.      | 64.     | 5.       | 0.24       |
|               |               |                 | N         | 5          | 5          | 5        | 5        | 5       | 5        | 5          |
|               |               |                 | Mean      | 30.        | 0.90       | 37.      | 41.      | 68.     | 4.       | 0.25       |
|               |               |                 | Sdev      | 1.5        | 0.058      | 6.6      | 12.8     | 8.7     | 1.8      | 0.034      |
| 50 mg/kg/day  |               |                 |           |            |            |          |          |         |          |            |
|               | 2514          | 2/1             | 28        | 23.        | 0.87       | 35.      | 39.      | 83.     | 6.       | 0.21       |
|               | 2521          | 2/1             | 28        | 26.        | 0.89       | 31.      | 38.      | 62.     | 5.       | 0.28       |
|               | 2529          | 2/1             | 28        | 23.        | 0.86       | 33.      | 26.      | 83.     | 5.       | 0.26       |
|               |               |                 | N         | 3          | 3          | 3        | 3        | 3       | 3        | 3          |
|               |               |                 | Mean      | 24.        | 0.87       | 33.      | 34.      | 76.     | 5.       | 0.25       |
|               |               |                 | Sdev      | 1.7        | 0.015      | 2.0      | 7.2      | 12.1    | 0.6      | 0.036      |
| 200 mg/kg/day |               |                 |           |            |            |          |          |         |          |            |
|               | 2515          | 3/1             | 28        | 25.        | 0.97       | 31.      | 32.      | 99.     | 5.       | 0.23       |
|               | 2523          | 3/1             | 28        | 34.        | 0.78       | 39.      | 30.      | 61.     | 6.       | 0.22       |
|               | 2526          | 3/1             | 28        | 22.        | 0.80       | 24.      | 27.      | 85.     | 6.       | 0.26       |
|               |               |                 | N         | 3          | 3          | 3        | 3        | 3       | 3        | 3          |
|               |               |                 | Mean      | 27.        | 0.85       | 31.      | 30.      | 82.     | 6.       | 0.24       |
|               |               |                 | Sdev      | 6.2        | 0.104      | 7.5      | 2.5      | 19.2    | 0.6      | 0.021      |
| 800 mg/kg/day |               |                 |           |            |            |          |          |         |          |            |
|               | 2517          | 4/1             | 28        | 43.        | 0.78       | 31.      | 49.      | 87.     | 9.       | 0.32       |
|               | 2519          | 4/1             | 28        | 34.        | 0.94       | 23.      | 25.      | 116.    | 6.       | 0.20       |
|               | 2525          | 4/1             | 28        | 32.        | 1.03       | 30.      | 35.      | 151.    | 7.       | 0.28       |
|               | 2528          | 4/1             | 28        | 29.        | 1.03       | 31.      | 32.      | 80.     | 12.      | 0.25       |
|               | 2530          | 4/1             | 28        | 25.        | 0.87       | 41.      | 40.      | 66.     | 6.       | 0.32       |
|               |               |                 | N         | 5          | 5          | 5        | 5        | 5       | 5        | 5          |
|               |               |                 | Mean      | 33.        | 0.93       | 31.      | 36.      | 100.    | 8.       | 0.27       |
|               |               |                 | Sdev      | 6.7        | 0.107      | 6.4      | 9.0      | 33.8    | 2.5      | 0.051      |

UREA - UREA  
ALT - ALANINE AMINO TRANSFERASE  
TBIL - TOTAL BILIRUBIN

CREA - CREATININE  
AP - ALKALINE PHOSPHATASE

AST - ASPARTATE AMINO TRANSFERASE  
GGT - GAMMA GLUTAMYL TRANSFERASE

CONFIDENTIAL

Appendix 8  
Day 28 Clinical Chemistry Data  
Test period

Session 1 (Scheduled)  
Fexinidazole

Study Number: 0505-2007

| M a l e s     |               |                 |           |           |          |           |            |          |            |  |
|---------------|---------------|-----------------|-----------|-----------|----------|-----------|------------|----------|------------|--|
| Dose Level    | Animal Number | Group/ Subgroup | Study Day | TPRO g/dL | ALB g/dL | GLOB g/dL | GLUC mg/dL | TG mg/dL | TCHO mg/dL |  |
| Vehicle       |               |                 |           |           |          |           |            |          |            |  |
|               | 2516          | 1/1             | 28        | 5.3       | 2.82     | 2.5       | 97.        | 21.      | 112.       |  |
|               | 2518          | 1/1             | 28        | 5.6       | 2.92     | 2.7       | 90.        | 28.      | 132.       |  |
|               | 2520          | 1/1             | 28        | 5.7       | 2.92     | 2.8       | 85.        | 16.      | 110.       |  |
|               | 2527          | 1/1             | 28        | 5.3       | 2.57     | 2.7       | 99.        | 22.      | 137.       |  |
|               | 2533          | 1/1             | 28        | 5.0       | 2.48     | 2.5       | 87.        | 29.      | 92.        |  |
|               |               |                 | N         | 5         | 5        | 5         | 5          | 5        | 5          |  |
|               |               |                 | Mean      | 5.4       | 2.74     | 2.6       | 92.        | 23.      | 117.       |  |
|               |               |                 | Sdev      | 0.28      | 0.205    | 0.13      | 6.1        | 5.4      | 18.2       |  |
| 50 mg/kg/day  |               |                 |           |           |          |           |            |          |            |  |
|               | 2514          | 2/1             | 28        | 5.5       | 3.05     | 2.5       | 98.        | 21.      | 113.       |  |
|               | 2521          | 2/1             | 28        | 5.5       | 2.94     | 2.6       | 94.        | 39.      | 138.       |  |
|               | 2529          | 2/1             | 28        | 5.2       | 2.86     | 2.3       | 93.        | 18.      | 127.       |  |
|               |               |                 | N         | 3         | 3        | 3         | 3          | 3        | 3          |  |
|               |               |                 | Mean      | 5.4       | 2.95     | 2.5       | 95.        | 26.      | 126.       |  |
|               |               |                 | Sdev      | 0.17      | 0.095    | 0.11      | 2.6        | 11.4     | 12.5       |  |
| 200 mg/kg/day |               |                 |           |           |          |           |            |          |            |  |
|               | 2515          | 3/1             | 28        | 5.4       | 3.05     | 2.4       | 92.        | 31.      | 155.       |  |
|               | 2523          | 3/1             | 28        | 5.0       | 2.35     | 2.7       | 98.        | 23.      | 133.       |  |
|               | 2526          | 3/1             | 28        | 5.6       | 2.85     | 2.8       | 106.       | 26.      | 134.       |  |
|               |               |                 | N         | 3         | 3        | 3         | 3          | 3        | 3          |  |
|               |               |                 | Mean      | 5.3       | 2.75     | 2.6       | 99.        | 27.      | 141.       |  |
|               |               |                 | Sdev      | 0.31      | 0.361    | 0.21      | 7.0        | 4.0      | 12.4       |  |
| 800 mg/kg/day |               |                 |           |           |          |           |            |          |            |  |
|               | 2517          | 4/1             | 28        | 5.2       | 2.87     | 2.3       | 88.        | 25.      | 169.       |  |
|               | 2519          | 4/1             | 28        | 5.4       | 2.79     | 2.6       | 86.        | 22.      | 125.       |  |
|               | 2525          | 4/1             | 28        | 5.6       | 3.15     | 2.5       | 89.        | 28.      | 172.       |  |
|               | 2528          | 4/1             | 28        | 5.3       | 2.76     | 2.5       | 95.        | 35.      | 193.       |  |
|               | 2530          | 4/1             | 28        | 5.3       | 2.82     | 2.5       | 107.       | 28.      | 116.       |  |
|               |               |                 | N         | 5         | 5        | 5         | 5          | 5        | 5          |  |
|               |               |                 | Mean      | 5.4       | 2.88     | 2.5       | 93.        | 28.      | 155.       |  |
|               |               |                 | Sdev      | 0.15      | 0.157    | 0.10      | 8.5        | 4.8      | 33.0       |  |

TPRO - TOTAL PROTEIN  
GLUC - GLUCOSE

ALB - ALBUMIN  
TG - TRIGLYCERIDES

GLOB - GLOBULIN  
TCHO - TOTAL CHOLESTEROL

CONFIDENTIAL

Appendix 8  
Day 28 Clinical Chemistry Data  
Test period

Session 1 (Scheduled)  
Fexinidazole

Study Number: 0505-2007

| M a l e s     |               |                 |           |          |            |      |          |         |          |  |
|---------------|---------------|-----------------|-----------|----------|------------|------|----------|---------|----------|--|
| Dose Level    | Animal Number | Group/ Subgroup | Study Day | CA mg/dL | PHOS mg/dL | AG   | NA mEq/L | K mEq/L | CL mEq/L |  |
| Vehicle       |               |                 |           |          |            |      |          |         |          |  |
|               | 2516          | 1/1             | 28        | 10.5     | 4.6        | 1.1  | 142.0    | 4.6     | 112.0    |  |
|               | 2518          | 1/1             | 28        | 10.5     | 4.9        | 1.1  | 141.0    | 4.6     | 111.0    |  |
|               | 2520          | 1/1             | 28        | 10.7     | 3.9        | 1.1  | 141.0    | 4.5     | 108.0    |  |
|               | 2527          | 1/1             | 28        | 10.5     | 4.3        | 0.9  | 141.0    | 4.3     | 107.0    |  |
|               | 2533          | 1/1             | 28        | 9.3      | 4.0        | 1.0  | 141.0    | 4.6     | 113.0    |  |
|               |               |                 | N         | 5        | 5          | 5    | 5        | 5       | 5        |  |
|               |               |                 | Mean      | 10.3     | 4.3        | 1.0  | 141.2    | 4.5     | 110.2    |  |
|               |               |                 | Sdev      | 0.57     | 0.42       | 0.08 | 0.45     | 0.12    | 2.59     |  |
| 50 mg/kg/day  |               |                 |           |          |            |      |          |         |          |  |
|               | 2514          | 2/1             | 28        | 10.4     | 4.3        | 1.2  | 143.0    | 4.5     | 111.0    |  |
|               | 2521          | 2/1             | 28        | 10.3     | 4.4        | 1.1  | 142.0    | 4.4     | 110.0    |  |
|               | 2529          | 2/1             | 28        | 10.2     | 4.4        | 1.2  | 142.0    | 4.2     | 110.0    |  |
|               |               |                 | N         | 3        | 3          | 3    | 3        | 3       | 3        |  |
|               |               |                 | Mean      | 10.3     | 4.4        | 1.2  | 142.3    | 4.3     | 110.3    |  |
|               |               |                 | Sdev      | 0.10     | 0.06       | 0.05 | 0.58     | 0.16    | 0.58     |  |
| 200 mg/kg/day |               |                 |           |          |            |      |          |         |          |  |
|               | 2515          | 3/1             | 28        | 10.4     | 3.9        | 1.3  | 144.0    | 4.4     | 112.0    |  |
|               | 2523          | 3/1             | 28        | 9.5      | 3.3        | 0.9  | 142.0    | 4.6     | 115.0    |  |
|               | 2526          | 3/1             | 28        | 10.9     | 4.5        | 1.0  | 141.0    | 4.2     | 107.0    |  |
|               |               |                 | N         | 3        | 3          | 3    | 3        | 3       | 3        |  |
|               |               |                 | Mean      | 10.3     | 3.9        | 1.1  | 142.3    | 4.4     | 111.3    |  |
|               |               |                 | Sdev      | 0.71     | 0.60       | 0.21 | 1.53     | 0.21    | 4.04     |  |
| 800 mg/kg/day |               |                 |           |          |            |      |          |         |          |  |
|               | 2517          | 4/1             | 28        | 9.4      | 3.9        | 1.2  | 141.0    | 4.5     | 111.0    |  |
|               | 2519          | 4/1             | 28        | 10.4     | 4.2        | 1.1  | 143.0    | 4.1     | 109.0    |  |
|               | 2525          | 4/1             | 28        | 10.7     | 5.2        | 1.3  | 144.0    | 4.6     | 111.0    |  |
|               | 2528          | 4/1             | 28        | 10.2     | 4.4        | 1.1  | 142.0    | 4.3     | 115.0    |  |
|               | 2530          | 4/1             | 28        | 10.1     | 3.8        | 1.1  | 141.0    | 4.5     | 112.0    |  |
|               |               |                 | N         | 5        | 5          | 5    | 5        | 5       | 5        |  |
|               |               |                 | Mean      | 10.2     | 4.3        | 1.2  | 142.2    | 4.4     | 111.6    |  |
|               |               |                 | Sdev      | 0.48     | 0.56       | 0.09 | 1.30     | 0.19    | 2.19     |  |

CA - CALCIUM  
NA - SODIUM

PHOS - PHOSPHOROUS  
K - POTASSIUM

AG - ALBUMIN/GLOBULIN  
CL - CHLORIDE

CONFIDENTIAL

Appendix 8  
Day 28 Clinical Chemistry Data  
Test period

Session 1 (Scheduled)  
Fexinidazole

Study Number: 0505-2007

| F e m a l e s |               |                 |           |            |            |          |          |         |          |            |
|---------------|---------------|-----------------|-----------|------------|------------|----------|----------|---------|----------|------------|
| Dose Level    | Animal Number | Group/ Subgroup | Study Day | UREA mg/dL | CREA mg/dL | AST IU/L | ALT IU/L | AP IU/L | GGT IU/L | TBIL mg/dL |
| Vehicle       |               |                 |           |            |            |          |          |         |          |            |
|               | 2560          | 1/1             | 28        | 21.        | 0.79       | 45.      | 36.      | 48.     | 3.       | 0.22       |
|               | 2568          | 1/1             | 28        | 26.        | 0.91       | 34.      | 38.      | 55.     | 5.       | 0.12       |
|               | 2572          | 1/1             | 28        | 23.        | 0.86       | 29.      | 35.      | 66.     | 4.       | 0.09       |
|               | 2575          | 1/1             | 28        | 22.        | 0.91       | 31.      | 33.      | 93.     | 5.       | 0.10       |
|               | 2577          | 1/1             | 28        | 22.        | 0.98       | 35.      | 34.      | 62.     | 3.       | 0.11       |
|               |               |                 | N         | 5          | 5          | 5        | 5        | 5       | 5        | 5          |
|               |               |                 | Mean      | 23.        | 0.89       | 35.      | 35.      | 65.     | 4.       | 0.13       |
|               |               |                 | Sdev      | 1.9        | 0.070      | 6.2      | 1.9      | 17.2    | 1.0      | 0.053      |
| 50 mg/kg/day  |               |                 |           |            |            |          |          |         |          |            |
|               | 2562          | 2/1             | 28        | 31.        | 0.88       | 30.      | 38.      | 92.     | 6.       | 0.10       |
|               | 2563          | 2/1             | 28        | 22.        | 0.88       | 33.      | 25.      | 58.     | 4.       | 0.10       |
|               | 2576          | 2/1             | 28        | 28.        | 0.90       | 39.      | 40.      | 76.     | 7.       | 0.21       |
|               |               |                 | N         | 3          | 3          | 3        | 3        | 3       | 3        | 3          |
|               |               |                 | Mean      | 27.        | 0.89       | 34.      | 34.      | 75.     | 6.       | 0.14       |
|               |               |                 | Sdev      | 4.6        | 0.012      | 4.6      | 8.1      | 17.0    | 1.5      | 0.064      |
| 200 mg/kg/day |               |                 |           |            |            |          |          |         |          |            |
|               | 2561          | 3/1             | 28        | 31.        | 0.84       | 47.      | 30.      | 60.     | 8.       | 0.11       |
|               | 2570          | 3/1             | 28        | 26.        | 0.81       | 34.      | 35.      | 77.     | 6.       | 0.11       |
|               | 2567          | 3/1             | 28        | 23.        | 0.88       | 40.      | 23.      | 96.     | 7.       | 0.10       |
|               |               |                 | N         | 3          | 3          | 3        | 3        | 3       | 3        | 3          |
|               |               |                 | Mean      | 27.        | 0.84       | 40.      | 29.      | 78.     | 7.       | 0.11       |
|               |               |                 | Sdev      | 4.0        | 0.035      | 6.5      | 6.0      | 18.0    | 1.0      | 0.006      |
| 800 mg/kg/day |               |                 |           |            |            |          |          |         |          |            |
|               | 2564          | 4/1             | 28        | 23.        | 0.83       | 31.      | 26.      | 66.     | 8.       | 0.12       |
|               | 2565          | 4/1             | 28        | 51.        | 0.92       | 25.      | 28.      | 58.     | 7.       | 0.32       |
|               | 2569          | 4/1             | 28        | 30.        | 1.03       | 33.      | 57.      | 101.    | 9.       | 0.20       |
|               | 2571          | 4/1             | 28        | 29.        | 0.98       | 31.      | 59.      | 81.     | 7.       | 0.12       |
|               | 2573          | 4/1             | 28        | 26.        | 0.88       | 23.      | 25.      | 62.     | 6.       | 0.12       |
|               |               |                 | N         | 5          | 5          | 5        | 5        | 5       | 5        | 5          |
|               |               |                 | Mean      | 32.        | 0.93       | 29.      | 39.      | 74.     | 7.       | 0.18       |
|               |               |                 | Sdev      | 11.1       | 0.079      | 4.3      | 17.4     | 17.6    | 1.1      | 0.088      |

UREA - UREA  
ALT - ALANINE AMINO TRANSFERASE  
TBIL - TOTAL BILIRUBIN

CREA - CREATININE  
AP - ALKALINE PHOSPHATASE

AST - ASPARTATE AMINO TRANSFERASE  
GGT - GAMMA GLUTAMYL TRANSFERASE

CONFIDENTIAL

Appendix 8  
Day 28 Clinical Chemistry Data  
Test period

Session 1 (Scheduled)  
Fexinidazole

Study Number: 0505-2007

| F e m a l e s |               |                 |           |           |          |           |            |          |            |  |
|---------------|---------------|-----------------|-----------|-----------|----------|-----------|------------|----------|------------|--|
| Dose Level    | Animal Number | Group/ Subgroup | Study Day | TPRO g/dL | ALB g/dL | GLOB g/dL | GLUC mg/dL | TG mg/dL | TCHO mg/dL |  |
| Vehicle       |               |                 |           |           |          |           |            |          |            |  |
|               | 2560          | 1/1             | 28        | 5.6       | 2.52     | 3.1       | 87.        | 20.      | 97.        |  |
|               | 2568          | 1/1             | 28        | 5.3       | 2.94     | 2.4       | 79.        | 23.      | 93.        |  |
|               | 2572          | 1/1             | 28        | 5.3       | 2.91     | 2.4       | 101.       | 17.      | 113.       |  |
|               | 2575          | 1/1             | 28        | 5.8       | 2.87     | 2.9       | 91.        | 23.      | 140.       |  |
|               | 2577          | 1/1             | 28        | 5.8       | 2.99     | 2.8       | 103.       | 24.      | 111.       |  |
|               |               |                 | N         | 5         | 5        | 5         | 5          | 5        | 5          |  |
|               |               |                 | Mean      | 5.6       | 2.85     | 2.7       | 92.        | 21.      | 111.       |  |
|               |               |                 | Sdev      | 0.25      | 0.187    | 0.32      | 10.0       | 2.9      | 18.5       |  |
| 50 mg/kg/day  |               |                 |           |           |          |           |            |          |            |  |
|               | 2562          | 2/1             | 28        | 5.6       | 3.00     | 2.6       | 75.        | 43.      | 107.       |  |
|               | 2563          | 2/1             | 28        | 5.2       | 2.67     | 2.5       | 111.       | 45.      | 186.       |  |
|               | 2576          | 2/1             | 28        | 5.7       | 3.01     | 2.7       | 91.        | 20.      | 129.       |  |
|               |               |                 | N         | 3         | 3        | 3         | 3          | 3        | 3          |  |
|               |               |                 | Mean      | 5.5       | 2.89     | 2.6       | 92.        | 36.      | 141.       |  |
|               |               |                 | Sdev      | 0.26      | 0.193    | 0.08      | 18.0       | 13.9     | 40.8       |  |
| 200 mg/kg/day |               |                 |           |           |          |           |            |          |            |  |
|               | 2561          | 3/1             | 28        | 5.5       | 2.92     | 2.6       | 108.       | 37.      | 181.       |  |
|               | 2570          | 3/1             | 28        | 5.5       | 2.95     | 2.6       | 105.       | 44.      | 128.       |  |
|               | 2567          | 3/1             | 28        | 5.3       | 2.72     | 2.6       | 84.        | 36.      | 120.       |  |
|               |               |                 | N         | 3         | 3        | 3         | 3          | 3        | 3          |  |
|               |               |                 | Mean      | 5.4       | 2.86     | 2.6       | 99.        | 39.      | 143.       |  |
|               |               |                 | Sdev      | 0.12      | 0.125    | 0.02      | 13.1       | 4.4      | 33.2       |  |
| 800 mg/kg/day |               |                 |           |           |          |           |            |          |            |  |
|               | 2564          | 4/1             | 28        | 5.4       | 2.74     | 2.7       | 106.       | 25.      | 232.       |  |
|               | 2565          | 4/1             | 28        | 5.9       | 3.01     | 2.9       | 104.       | 38.      | 200.       |  |
|               | 2569          | 4/1             | 28        | 5.4       | 3.00     | 2.4       | 118.       | 45.      | 122.       |  |
|               | 2571          | 4/1             | 28        | 5.4       | 2.99     | 2.4       | 105.       | 34.      | 177.       |  |
|               | 2573          | 4/1             | 28        | 6.1       | 3.05     | 3.1       | 97.        | 25.      | 171.       |  |
|               |               |                 | N         | 5         | 5        | 5         | 5          | 5        | 5          |  |
|               |               |                 | Mean      | 5.6       | 2.96     | 2.7       | 106.       | 33.      | 180.       |  |
|               |               |                 | Sdev      | 0.34      | 0.124    | 0.29      | 7.6        | 8.6      | 40.5       |  |

TPRO - TOTAL PROTEIN  
GLUC - GLUCOSE

ALB - ALBUMIN  
TG - TRIGLYCERIDES

GLOB - GLOBULIN  
TCHO - TOTAL CHOLESTEROL

CONFIDENTIAL

Appendix 8  
Day 28 Clinical Chemistry Data  
Test period

Session 1 (Scheduled)  
Fexinidazole

Study Number: 0505-2007

| F e m a l e s |               |                 |           |          |            |      |          |         |          |  |
|---------------|---------------|-----------------|-----------|----------|------------|------|----------|---------|----------|--|
| Dose Level    | Animal Number | Group/ Subgroup | Study Day | CA mg/dL | PHOS mg/dL | AG   | NA mEq/L | K mEq/L | CL mEq/L |  |
| Vehicle       |               |                 |           |          |            |      |          |         |          |  |
|               | 2560          | 1/1             | 28        | 9.6      | 3.8        | 0.8  | 141.0    | 4.6     | 113.0    |  |
|               | 2568          | 1/1             | 28        | 10.6     | 4.6        | 1.2  | 142.0    | 4.8     | 109.0    |  |
|               | 2572          | 1/1             | 28        | 10.1     | 3.5        | 1.2  | 142.0    | 4.3     | 112.0    |  |
|               | 2575          | 1/1             | 28        | 10.3     | 4.0        | 1.0  | 142.0    | 4.4     | 111.0    |  |
|               | 2577          | 1/1             | 28        | 11.0     | 4.1        | 1.1  | 143.0    | 4.2     | 108.0    |  |
|               |               |                 | N         | 5        | 5          | 5    | 5        | 5       | 5        |  |
|               |               |                 | Mean      | 10.3     | 4.0        | 1.1  | 142.0    | 4.5     | 110.6    |  |
|               |               |                 | Sdev      | 0.53     | 0.41       | 0.18 | 0.71     | 0.24    | 2.07     |  |
| 50 mg/kg/day  |               |                 |           |          |            |      |          |         |          |  |
|               | 2562          | 2/1             | 28        | 10.5     | 4.3        | 1.2  | 141.0    | 4.4     | 109.0    |  |
|               | 2563          | 2/1             | 28        | 10.4     | 4.2        | 1.1  | 143.0    | 4.2     | 109.0    |  |
|               | 2576          | 2/1             | 28        | 11.1     | 4.5        | 1.1  | 143.0    | 4.4     | 111.0    |  |
|               |               |                 | N         | 3        | 3          | 3    | 3        | 3       | 3        |  |
|               |               |                 | Mean      | 10.7     | 4.3        | 1.1  | 142.3    | 4.3     | 109.7    |  |
|               |               |                 | Sdev      | 0.38     | 0.15       | 0.05 | 1.15     | 0.14    | 1.15     |  |
| 200 mg/kg/day |               |                 |           |          |            |      |          |         |          |  |
|               | 2561          | 3/1             | 28        | 10.8     | 3.1        | 1.1  | 144.0    | 4.2     | 112.0    |  |
|               | 2570          | 3/1             | 28        | 9.9      | 4.7        | 1.2  | 143.0    | 4.7     | 113.0    |  |
|               | 2567          | 3/1             | 28        | 10.2     | 3.9        | 1.1  | 142.0    | 4.2     | 110.0    |  |
|               |               |                 | N         | 3        | 3          | 3    | 3        | 3       | 3        |  |
|               |               |                 | Mean      | 10.3     | 3.9        | 1.1  | 143.0    | 4.4     | 111.7    |  |
|               |               |                 | Sdev      | 0.46     | 0.80       | 0.05 | 1.00     | 0.27    | 1.53     |  |
| 800 mg/kg/day |               |                 |           |          |            |      |          |         |          |  |
|               | 2564          | 4/1             | 28        | 10.6     | 3.9        | 1.0  | 145.0    | 4.2     | 112.0    |  |
|               | 2565          | 4/1             | 28        | 11.5     | 4.4        | 1.0  | 146.0    | 4.0     | 104.0    |  |
|               | 2569          | 4/1             | 28        | 10.6     | 3.7        | 1.3  | 145.0    | 4.4     | 114.0    |  |
|               | 2571          | 4/1             | 28        | 10.9     | 3.6        | 1.2  | 142.0    | 4.3     | 111.0    |  |
|               | 2573          | 4/1             | 28        | 10.7     | 4.1        | 1.0  | 143.0    | 4.4     | 108.0    |  |
|               |               |                 | N         | 5        | 5          | 5    | 5        | 5       | 5        |  |
|               |               |                 | Mean      | 10.9     | 3.9        | 1.1  | 144.2    | 4.3     | 109.8    |  |
|               |               |                 | Sdev      | 0.38     | 0.32       | 0.12 | 1.64     | 0.18    | 3.90     |  |

CA - CALCIUM  
NA - SODIUM

PHOS - PHOSPHOROUS  
K - POTASSIUM

AG - ALBUMIN/GLOBULIN  
CL - CHLORIDE



CONFIDENTIAL

Appendix 8  
 Day 42 Clinical Chemistry Data  
 Test period

Session 1 (Scheduled)  
 Fexinidazole

Study Number: 0505-2007

| M a l e s     |               |                 |           |            |            |          |          |         |          |            |
|---------------|---------------|-----------------|-----------|------------|------------|----------|----------|---------|----------|------------|
| Dose Level    | Animal Number | Group/ Subgroup | Study Day | UREA mg/dL | CREA mg/dL | AST IU/L | ALT IU/L | AP IU/L | GGT IU/L | TBIL mg/dL |
| Vehicle       |               |                 |           |            |            |          |          |         |          |            |
|               | 2527          | 1/1             | 42        | 42.        | 0.91       | 31.      | 23.      | 56.     | 5.       | 0.07       |
|               | 2533          | 1/1             | 42        | 32.        | 0.85       | 44.      | 41.      | 61.     | 8.       | 0.08       |
|               |               |                 | N         | 2          | 2          | 2        | 2        | 2       | 2        | 2          |
|               |               |                 | Mean      | 37.        | 0.88       | 38.      | 32.      | 59.     | 7.       | 0.08       |
|               |               |                 | Sdev      | 7.1        | 0.042      | 9.2      | 12.7     | 3.5     | 2.1      | 0.007      |
| 800 mg/kg/day |               |                 |           |            |            |          |          |         |          |            |
|               | 2528          | 4/1             | 42        | 24.        | 0.81       | 36.      | 58.      | 78.     | 13.      | 0.09       |
|               | 2530          | 4/1             | 42        | 25.        | 0.73       | 44.      | 27.      | 63.     | 7.       | 0.07       |
|               |               |                 | N         | 2          | 2          | 2        | 2        | 2       | 2        | 2          |
|               |               |                 | Mean      | 25.        | 0.77       | 40.      | 43.      | 71.     | 10.      | 0.08       |
|               |               |                 | Sdev      | 0.7        | 0.057      | 5.7      | 21.9     | 10.6    | 4.2      | 0.014      |

UREA - UREA  
 ALT - ALANINE AMINO TRANSFERASE  
 TBIL - TOTAL BILIRUBIN

CREA - CREATININE  
 AP - ALKALINE PHOSPHATASE

AST - ASPARTATE AMINO TRANSFERASE  
 GGT - GAMMA GLUTAMYL TRANSFERASE

CONFIDENTIAL

Appendix 8  
 Day 42 Clinical Chemistry Data  
 Test period

Session 1 (Scheduled)  
 Fexinidazole

Study Number: 0505-2007

| M a l e s     |               |                 |           |           |          |           |            |          |            |
|---------------|---------------|-----------------|-----------|-----------|----------|-----------|------------|----------|------------|
| Dose Level    | Animal Number | Group/ Subgroup | Study Day | TPRO g/dL | ALB g/dL | GLOB g/dL | GLUC mg/dL | TG mg/dL | TCHO mg/dL |
| Vehicle       |               |                 |           |           |          |           |            |          |            |
|               | 2527          | 1/1             | 42        | 5.8       | 2.57     | 3.2       | 105.       | 33.      | 148.       |
|               | 2533          | 1/1             | 42        | 5.6       | 2.55     | 3.1       | 93.        | 24.      | 85.        |
|               |               |                 | N         | 2         | 2        | 2         | 2          | 2        | 2          |
|               |               |                 | Mean      | 5.7       | 2.56     | 3.1       | 99.        | 29.      | 117.       |
|               |               |                 | Sdev      | 0.14      | 0.014    | 0.13      | 8.5        | 6.4      | 44.5       |
| 800 mg/kg/day |               |                 |           |           |          |           |            |          |            |
|               | 2528          | 4/1             | 42        | 6.1       | 2.89     | 3.2       | 82.        | 27.      | 141.       |
|               | 2530          | 4/1             | 42        | 6.2       | 2.94     | 3.3       | 100.       | 18.      | 91.        |
|               |               |                 | N         | 2         | 2        | 2         | 2          | 2        | 2          |
|               |               |                 | Mean      | 6.2       | 2.92     | 3.2       | 91.        | 23.      | 116.       |
|               |               |                 | Sdev      | 0.07      | 0.035    | 0.04      | 12.7       | 6.4      | 35.4       |

TPRO - TOTAL PROTEIN  
 GLUC - GLUCOSE

ALB - ALBUMIN  
 TG - TRIGLYCERIDES

GLOB - GLOBULIN  
 TCHO - TOTAL CHOLESTEROL

CONFIDENTIAL

Appendix 8  
 Day 42 Clinical Chemistry Data  
 Test period

Session 1 (Scheduled)  
 Fexinidazole

Study Number: 0505-2007

| M a l e s     |               |                 |           |          |            |      |          |         |          |
|---------------|---------------|-----------------|-----------|----------|------------|------|----------|---------|----------|
| Dose Level    | Animal Number | Group/ Subgroup | Study Day | CA mg/dL | PHOS mg/dL | AG   | NA mEq/L | K mEq/L | CL mEq/L |
| Vehicle       |               |                 |           |          |            |      |          |         |          |
|               | 2527          | 1/1             | 42        | 11.0     | 5.0        | 0.8  | 142.0    | 4.4     | 109.0    |
|               | 2533          | 1/1             | 42        | 9.6      | 4.5        | 0.8  | 141.0    | 4.6     | 114.0    |
|               |               |                 | N         | 2        | 2          | 2    | 2        | 2       | 2        |
|               |               |                 | Mean      | 10.3     | 4.8        | 0.8  | 141.5    | 4.5     | 111.5    |
|               |               |                 | Sdev      | 0.99     | 0.35       | 0.03 | 0.71     | 0.11    | 3.54     |
| 800 mg/kg/day |               |                 |           |          |            |      |          |         |          |
|               | 2528          | 4/1             | 42        | 10.9     | 4.0        | 0.9  | 142.0    | 4.6     | 108.0    |
|               | 2530          | 4/1             | 42        | 10.5     | 4.7        | 0.9  | 142.0    | 4.3     | 109.0    |
|               |               |                 | N         | 2        | 2          | 2    | 2        | 2       | 2        |
|               |               |                 | Mean      | 10.7     | 4.4        | 0.9  | 142.0    | 4.5     | 108.5    |
|               |               |                 | Sdev      | 0.28     | 0.49       | 0.00 | 0.00     | 0.17    | 0.71     |

CA - CALCIUM  
 NA - SODIUM

PHOS - PHOSPHOROUS  
 K - POTASSIUM

AG - ALBUMIN/GLOBULIN  
 CL - CHLORIDE

CONFIDENTIAL

Appendix 8  
 Day 42 Clinical Chemistry Data  
 Test period

Session 1 (Scheduled)  
 Fexinidazole

Study Number: 0505-2007

| F e m a l e s |               |                 |           |            |            |          |          |         |          |            |
|---------------|---------------|-----------------|-----------|------------|------------|----------|----------|---------|----------|------------|
| Dose Level    | Animal Number | Group/ Subgroup | Study Day | UREA mg/dL | CREA mg/dL | AST IU/L | ALT IU/L | AP IU/L | GGT IU/L | TBIL mg/dL |
| Vehicle       |               |                 |           |            |            |          |          |         |          |            |
|               | 2575          | 1/1             | 42        | 22.        | 0.93       | 33.      | 26.      | 106.    | 7.       | 0.07       |
|               | 2577          | 1/1             | 42        | 29.        | 0.98       | 38.      | 36.      | 53.     | 6.       | 0.08       |
|               |               |                 | N         | 2          | 2          | 2        | 2        | 2       | 2        | 2          |
|               |               |                 | Mean      | 26.        | 0.96       | 36.      | 31.      | 80.     | 7.       | 0.08       |
|               |               |                 | Sdev      | 4.9        | 0.035      | 3.5      | 7.1      | 37.5    | 0.7      | 0.007      |
| 800 mg/kg/day |               |                 |           |            |            |          |          |         |          |            |
|               | 2571          | 4/1             | 42        | 31.        | 0.94       | 22.      | 38.      | 75.     | 8.       | 0.07       |
|               | 2573          | 4/1             | 42        | 25.        | 0.87       | 25.      | 29.      | 62.     | 7.       | 0.09       |
|               |               |                 | N         | 2          | 2          | 2        | 2        | 2       | 2        | 2          |
|               |               |                 | Mean      | 28.        | 0.91       | 24.      | 34.      | 69.     | 8.       | 0.08       |
|               |               |                 | Sdev      | 4.2        | 0.049      | 2.1      | 6.4      | 9.2     | 0.7      | 0.014      |

UREA - UREA  
 ALT - ALANINE AMINO TRANSFERASE  
 TBIL - TOTAL BILIRUBIN

CREA - CREATININE  
 AP - ALKALINE PHOSPHATASE

AST - ASPARTATE AMINO TRANSFERASE  
 GGT - GAMMA GLUTAMYL TRANSFERASE

CONFIDENTIAL

Appendix 8  
 Day 42 Clinical Chemistry Data  
 Test period

Session 1 (Scheduled)  
 Fexinidazole

Study Number: 0505-2007

| F e m a l e s |               |                 |           |           |          |           |            |          |            |
|---------------|---------------|-----------------|-----------|-----------|----------|-----------|------------|----------|------------|
| Dose Level    | Animal Number | Group/ Subgroup | Study Day | TPRO g/dL | ALB g/dL | GLOB g/dL | GLUC mg/dL | TG mg/dL | TCHO mg/dL |
| Vehicle       |               |                 |           |           |          |           |            |          |            |
|               | 2575          | 1/1             | 42        | 6.0       | 2.91     | 3.1       | 93.        | 27.      | 135.       |
|               | 2577          | 1/1             | 42        | 5.7       | 2.87     | 2.8       | 101.       | 38.      | 111.       |
|               |               |                 | N         | 2         | 2        | 2         | 2          | 2        | 2          |
|               |               |                 | Mean      | 5.9       | 2.89     | 3.0       | 97.        | 33.      | 123.       |
|               |               |                 | Sdev      | 0.21      | 0.028    | 0.18      | 5.7        | 7.8      | 17.0       |
| 800 mg/kg/day |               |                 |           |           |          |           |            |          |            |
|               | 2571          | 4/1             | 42        | 5.8       | 2.93     | 2.9       | 115.       | 37.      | 187.       |
|               | 2573          | 4/1             | 42        | 5.7       | 2.90     | 2.8       | 94.        | 20.      | 130.       |
|               |               |                 | N         | 2         | 2        | 2         | 2          | 2        | 2          |
|               |               |                 | Mean      | 5.8       | 2.92     | 2.8       | 105.       | 29.      | 159.       |
|               |               |                 | Sdev      | 0.07      | 0.021    | 0.05      | 14.8       | 12.0     | 40.3       |

TPRO - TOTAL PROTEIN  
 GLUC - GLUCOSE

ALB - ALBUMIN  
 TG - TRIGLYCERIDES

GLOB - GLOBULIN  
 TCHO - TOTAL CHOLESTEROL

CONFIDENTIAL

Appendix 8  
 Day 42 Clinical Chemistry Data  
 Test period

Session 1 (Scheduled)  
 Fexinidazole

Study Number: 0505-2007

| F e m a l e s |               |                 |           |          |            |      |          |         |          |
|---------------|---------------|-----------------|-----------|----------|------------|------|----------|---------|----------|
| Dose Level    | Animal Number | Group/ Subgroup | Study Day | CA mg/dL | PHOS mg/dL | AG   | NA mEq/L | K mEq/L | CL mEq/L |
| Vehicle       |               |                 |           |          |            |      |          |         |          |
|               | 2575          | 1/1             | 42        | 10.8     | 4.6        | 0.9  | 140.0    | 4.5     | 112.0    |
|               | 2577          | 1/1             | 42        | 11.1     | 4.7        | 1.0  | 142.0    | 4.3     | 110.0    |
|               |               |                 | N         | 2        | 2          | 2    | 2        | 2       | 2        |
|               |               |                 | Mean      | 11.0     | 4.7        | 1.0  | 141.0    | 4.4     | 111.0    |
|               |               |                 | Sdev      | 0.21     | 0.07       | 0.05 | 1.41     | 0.12    | 1.41     |
| 800 mg/kg/day |               |                 |           |          |            |      |          |         |          |
|               | 2571          | 4/1             | 42        | 11.1     | 4.3        | 1.0  | 140.0    | 4.5     | 111.0    |
|               | 2573          | 4/1             | 42        | 10.6     | 4.6        | 1.0  | 140.0    | 4.6     | 108.0    |
|               |               |                 | N         | 2        | 2          | 2    | 2        | 2       | 2        |
|               |               |                 | Mean      | 10.9     | 4.5        | 1.0  | 140.0    | 4.5     | 109.5    |
|               |               |                 | Sdev      | 0.35     | 0.21       | 0.01 | 0.00     | 0.03    | 2.12     |

CA - CALCIUM  
 NA - SODIUM

PHOS - PHOSPHOROUS  
 K - POTASSIUM

AG - ALBUMIN/GLOBULIN  
 CL - CHLORIDE

## ***Appendix 9 Urinalysis***

CONFIDENTIAL

Appendix 9  
Day -7 Urine Data  
Pretest phase

Session 1 (Scheduled)  
Fexinidazole

Study Number: 0505-2007

| M a l e s     |               |                 |           |        |          |           |           |           |           |           |
|---------------|---------------|-----------------|-----------|--------|----------|-----------|-----------|-----------|-----------|-----------|
| Dose Level    | Animal Number | Group/ Subgroup | Study Day | VOL mL | PH UNITS | WBC SCORE | NIT SCORE | PRO SCORE | GLU SCORE | KET SCORE |
| Vehicle       |               |                 |           |        |          |           |           |           |           |           |
|               | 2516          | 1/1             | -7        | 246.0  | 7.0      | 1.        | 0.        | 0.        | 0.        | 0.        |
|               | 2518          | 1/1             | -7        | 364.0  | 7.0      | 2.        | 0.        | 0.        | 0.        | 0.        |
|               | 2520          | 1/1             | -7        | 192.0  | 8.0      | 1.        | 0.        | 0.        | 0.        | 0.        |
|               | 2527          | 1/1             | -7        | 188.0  | 7.0      | 1.        | 0.        | 0.        | 0.        | 0.        |
|               | 2533          | 1/1             | -7        | 224.0  | 7.0      | 0.        | 1.        | 1.        | 3.        | 0.        |
|               |               |                 | N         | 5      | 5        | 5         | 5         | 5         | 5         | 5         |
|               |               |                 | Mean      | 242.8  | 7.2      | 1.        | 0.        | 0.        | 1.        | 0.        |
|               |               |                 | Sdev      | 71.83  | 0.45     | 0.7       | 0.4       | 0.4       | 1.3       | 0.0       |
| 50 mg/kg/day  |               |                 |           |        |          |           |           |           |           |           |
|               | 2514          | 2/1             | -7        | 240.0  | 8.0      | 0.        | 0.        | 0.        | 0.        | 0.        |
|               | 2521          | 2/1             | -7        | 67.0   | 8.0      | 1.        | 0.        | 0.        | 0.        | 0.        |
|               | 2529          | 2/1             | -7        | 184.0  | 6.5      | 2.        | 0.        | 1.        | 0.        | 0.        |
|               |               |                 | N         | 3      | 3        | 3         | 3         | 3         | 3         | 3         |
|               |               |                 | Mean      | 163.7  | 7.5      | 1.        | 0.        | 0.        | 0.        | 0.        |
|               |               |                 | Sdev      | 88.27  | 0.87     | 1.0       | 0.0       | 0.6       | 0.0       | 0.0       |
| 200 mg/kg/day |               |                 |           |        |          |           |           |           |           |           |
|               | 2515          | 3/1             | -7        | 98.0   | 9.0      | 2.        | 0.        | 1.        | 0.        | 0.        |
|               | 2523          | 3/1             | -7        | 394.0  | 7.0      | 2.        | 0.        | 0.        | 0.        | 0.        |
|               | 2526          | 3/1             | -7        | 86.0   | 5.0      | 0.        | 0.        | 0.        | 2.        | 0.        |
|               |               |                 | N         | 3      | 3        | 3         | 3         | 3         | 3         | 3         |
|               |               |                 | Mean      | 192.7  | 7.0      | 1.        | 0.        | 0.        | 1.        | 0.        |
|               |               |                 | Sdev      | 174.46 | 2.00     | 1.2       | 0.0       | 0.6       | 1.2       | 0.0       |
| 800 mg/kg/day |               |                 |           |        |          |           |           |           |           |           |
|               | 2517          | 4/1             | -7        | 690.0  | 7.0      | 0.        | 0.        | 0.        | 0.        | 0.        |
|               | 2519          | 4/1             | -7        | 191.0  | 7.0      | 1.        | 1.        | 1.        | 0.        | 0.        |
|               | 2525          | 4/1             | -7        | 383.0  | 7.0      | 0.        | 0.        | 0.        | 0.        | 0.        |
|               | 2528          | 4/1             | -7        | 138.0  | 7.0      | 0.        | 0.        | 1.        | 0.        | 0.        |
|               | 2530          | 4/1             | -7        | 668.0  | 7.0      | 2.        | 0.        | 0.        | 0.        | 0.        |
|               |               |                 | N         | 5      | 5        | 5         | 5         | 5         | 5         | 5         |
|               |               |                 | Mean      | 414.0  | 7.0      | 1.        | 0.        | 0.        | 0.        | 0.        |
|               |               |                 | Sdev      | 258.63 | 0.00     | 0.9       | 0.4       | 0.5       | 0.0       | 0.0       |

VOL - URINARY VOLUME  
NIT - NITRITES  
KET - KETONE BODIES

PH - PH  
PRO - PROTEINS

WBC - WHITE BLOOD CELLS  
GLU - GLUCOSE



CONFIDENTIAL

Appendix 9  
Day -7 Urine Data  
Pretest phase

Session 1 (Scheduled)  
Fexinidazole

Study Number: 0505-2007

| M a l e s     |               |                 |           |           |           |           |        |     |     |  |
|---------------|---------------|-----------------|-----------|-----------|-----------|-----------|--------|-----|-----|--|
| Dose Level    | Animal Number | Group/ Subgroup | Study Day | UBG SCORE | BIL SCORE | RBC SCORE | SG     | COL | APP |  |
| Vehicle       |               |                 |           |           |           |           |        |     |     |  |
|               | 2516          | 1/1             | -7        | 0.        | 0.        | 0.        | 1.017  | A   | L   |  |
|               | 2518          | 1/1             | -7        | 0.        | 0.        | 1.        | 1.018  | Y   | T   |  |
|               | 2520          | 1/1             | -7        | 0.        | 0.        | 0.        | 1.014  | Y   | L   |  |
|               | 2527          | 1/1             | -7        | 0.        | 0.        | 0.        | 1.018  | Y   | L   |  |
|               | 2533          | 1/1             | -7        | 0.        | 0.        | 2.        | 1.017  | A   | LT  |  |
|               |               |                 | N         | 5         | 5         | 5         | 5      | 0   | 0   |  |
|               |               |                 | Mean      | 0.        | 0.        | 1.        | 1.017  | -   | -   |  |
|               |               |                 | Sdev      | 0.0       | 0.0       | 0.9       | 0.0016 | -   | -   |  |
| 50 mg/kg/day  |               |                 |           |           |           |           |        |     |     |  |
|               | 2514          | 2/1             | -7        | 0.        | 0.        | 0.        | 1.026  | A   | L   |  |
|               | 2521          | 2/1             | -7        | 0.        | 0.        | 0.        | 1.014  | W   | L   |  |
|               | 2529          | 2/1             | -7        | 0.        | 0.        | 1.        | 1.024  | A   | L   |  |
|               |               |                 | N         | 3         | 3         | 3         | 3      | 0   | 0   |  |
|               |               |                 | Mean      | 0.        | 0.        | 0.        | 1.021  | -   | -   |  |
|               |               |                 | Sdev      | 0.0       | 0.0       | 0.6       | 0.0064 | -   | -   |  |
| 200 mg/kg/day |               |                 |           |           |           |           |        |     |     |  |
|               | 2515          | 3/1             | -7        | 0.        | 0.        | 0.        | 1.034  | B   | LT  |  |
|               | 2523          | 3/1             | -7        | 0.        | 0.        | 1.        | 1.018  | Y   | L   |  |
|               | 2526          | 3/1             | -7        | 0.        | 0.        | 1.        | 1.007  | W   | L   |  |
|               |               |                 | N         | 3         | 3         | 3         | 3      | 0   | 0   |  |
|               |               |                 | Mean      | 0.        | 0.        | 1.        | 1.020  | -   | -   |  |
|               |               |                 | Sdev      | 0.0       | 0.0       | 0.6       | 0.0136 | -   | -   |  |
| 800 mg/kg/day |               |                 |           |           |           |           |        |     |     |  |
|               | 2517          | 4/1             | -7        | 0.        | 0.        | 0.        | 1.011  | Y   | L   |  |
|               | 2519          | 4/1             | -7        | 0.        | 0.        | 1.        | 1.029  | A   | T   |  |
|               | 2525          | 4/1             | -7        | 0.        | 0.        | 0.        | 1.020  | A   | L   |  |
|               | 2528          | 4/1             | -7        | 0.        | 0.        | 1.        | 1.040  | B   | T   |  |
|               | 2530          | 4/1             | -7        | 0.        | 0.        | 1.        | 1.014  | Y   | T   |  |
|               |               |                 | N         | 5         | 5         | 5         | 5      | 0   | 0   |  |
|               |               |                 | Mean      | 0.        | 0.        | 1.        | 1.023  | -   | -   |  |
|               |               |                 | Sdev      | 0.0       | 0.0       | 0.5       | 0.0118 | -   | -   |  |

UBG - UROBILINOGEN  
SG - SPECIFIC GRAVITY

BIL - BILIRUBIN  
COL - COLOUR

RBC - HEMOGLOBIN/RED BLOOD CELLS  
APP - APPEARANCE

CONFIDENTIAL

Appendix 9  
Day -7 Urine Data  
Pretest phase

Session 1 (Scheduled)  
Fexinidazole

Study Number: 0505-2007

F e m a l e s

| Dose Level    | Animal Number | Group/Subgroup | Study Day | VOL mL | PH UNITS | WBC SCORE | NIT SCORE | PRO SCORE | GLU SCORE | KET SCORE |
|---------------|---------------|----------------|-----------|--------|----------|-----------|-----------|-----------|-----------|-----------|
| Vehicle       |               |                |           |        |          |           |           |           |           |           |
|               | 2560          | 1/1            | -7        | 121.0  | 7.0      | 0.        | 0.        | 0.        | 0.        | 0.        |
|               | 2568          | 1/1            | -7        | 113.0  | 7.0      | 0.        | 0.        | 0.        | 0.        | 0.        |
|               | 2572          | 1/1            | -7        | 381.0  | 7.0      | 0.        | 0.        | 0.        | 0.        | 0.        |
|               | 2575          | 1/1            | -7        | 152.0  | 6.5      | 0.        | 0.        | 0.        | 0.        | 0.        |
|               | 2577          | 1/1            | -7        | 214.0  | 7.0      | 0.        | 0.        | 0.        | 0.        | 0.        |
|               |               |                | N         | 5      | 5        | 5         | 5         | 5         | 5         | 5         |
|               |               |                | Mean      | 196.2  | 6.9      | 0.        | 0.        | 0.        | 0.        | 0.        |
|               |               |                | Sdev      | 110.68 | 0.22     | 0.0       | 0.0       | 0.0       | 0.0       | 0.0       |
| 50 mg/kg/day  |               |                |           |        |          |           |           |           |           |           |
|               | 2562          | 2/1            | -7        | 34.0   | 7.0      | 0.        | 0.        | 0.        | 0.        | 0.        |
|               | 2563          | 2/1            | -7        | 201.0  | 7.0      | 0.        | 0.        | 0.        | 0.        | 0.        |
|               | 2576          | 2/1            | -7        | 204.0  | 7.0      | 0.        | 0.        | 0.        | 0.        | 0.        |
|               |               |                | N         | 3      | 3        | 3         | 3         | 3         | 3         | 3         |
|               |               |                | Mean      | 146.3  | 7.0      | 0.        | 0.        | 0.        | 0.        | 0.        |
|               |               |                | Sdev      | 97.30  | 0.00     | 0.0       | 0.0       | 0.0       | 0.0       | 0.0       |
| 200 mg/kg/day |               |                |           |        |          |           |           |           |           |           |
|               | 2561          | 3/1            | -7        | 82.0   | 7.0      | 0.        | 0.        | 0.        | 0.        | 0.        |
|               | 2570          | 3/1            | -7        | 288.0  | 7.0      | 0.        | 0.        | 0.        | 0.        | 0.        |
|               | 2567          | 3/1            | -7        | 124.0  | 6.5      | 0.        | 0.        | 0.        | 0.        | 0.        |
|               |               |                | N         | 3      | 3        | 3         | 3         | 3         | 3         | 3         |
|               |               |                | Mean      | 164.7  | 6.8      | 0.        | 0.        | 0.        | 0.        | 0.        |
|               |               |                | Sdev      | 108.85 | 0.29     | 0.0       | 0.0       | 0.0       | 0.0       | 0.0       |
| 800 mg/kg/day |               |                |           |        |          |           |           |           |           |           |
|               | 2564          | 4/1            | -7        | 159.0  | 8.0      | 0.        | 0.        | 0.        | 0.        | 0.        |
|               | 2565          | 4/1            | -7        | 50.0   | 6.5      | 0.        | 1.        | 2.        | 4.        | 1.        |
|               | 2569          | 4/1            | -7        | 275.0  | 7.0      | 1.        | 1.        | 1.        | 0.        | 0.        |
|               | 2571          | 4/1            | -7        | 314.0  | 7.0      | 0.        | 0.        | 0.        | 0.        | 0.        |
|               | 2573          | 4/1            | -7        | 100.0  | 7.0      | 0.        | 0.        | 0.        | 0.        | 0.        |
|               |               |                | N         | 5      | 5        | 5         | 5         | 5         | 5         | 5         |
|               |               |                | Mean      | 179.6  | 7.1      | 0.        | 0.        | 1.        | 1.        | 0.        |
|               |               |                | Sdev      | 112.61 | 0.55     | 0.4       | 0.5       | 0.9       | 1.8       | 0.4       |

VOL - URINARY VOLUME  
NIT - NITRITES  
KET - KETONE BODIES

PH - PH  
PRO - PROTEINS

WBC - WHITE BLOOD CELLS  
GLU - GLUCOSE

CONFIDENTIAL

Appendix 9  
Day -7 Urine Data  
Pretest phase

Session 1 (Scheduled)  
Fexinidazole

Study Number: 0505-2007

| F e m a l e s |               |                 |           |           |           |           |        |     |     |  |
|---------------|---------------|-----------------|-----------|-----------|-----------|-----------|--------|-----|-----|--|
| Dose Level    | Animal Number | Group/ Subgroup | Study Day | UBG SCORE | BIL SCORE | RBC SCORE | SG     | COL | APP |  |
| Vehicle       |               |                 |           |           |           |           |        |     |     |  |
|               | 2560          | 1/1             | -7        | 0.        | 0.        | 0.        | 1.034  | A   | LT  |  |
|               | 2568          | 1/1             | -7        | 0.        | 0.        | 0.        | 1.035  | A   | LT  |  |
|               | 2572          | 1/1             | -7        | 0.        | 0.        | 0.        | 1.016  | Y   | L   |  |
|               | 2575          | 1/1             | -7        | 0.        | 0.        | 0.        | 1.028  | Y   | L   |  |
|               | 2577          | 1/1             | -7        | 0.        | 0.        | 0.        | 1.020  | Y   | L   |  |
|               |               |                 | N         | 5         | 5         | 5         | 5      | 0   | 0   |  |
|               |               |                 | Mean      | 0.        | 0.        | 0.        | 1.027  | -   | -   |  |
|               |               |                 | Sdev      | 0.0       | 0.0       | 0.0       | 0.0084 | -   | -   |  |
| 50 mg/kg/day  |               |                 |           |           |           |           |        |     |     |  |
|               | 2562          | 2/1             | -7        | 0.        | 0.        | 0.        | 1.021  | Y   | L   |  |
|               | 2563          | 2/1             | -7        | 0.        | 0.        | 0.        | 1.015  | Y   | L   |  |
|               | 2576          | 2/1             | -7        | 0.        | 0.        | 0.        | 1.022  | Y   | L   |  |
|               |               |                 | N         | 3         | 3         | 3         | 3      | 0   | 0   |  |
|               |               |                 | Mean      | 0.        | 0.        | 0.        | 1.019  | -   | -   |  |
|               |               |                 | Sdev      | 0.0       | 0.0       | 0.0       | 0.0038 | -   | -   |  |
| 200 mg/kg/day |               |                 |           |           |           |           |        |     |     |  |
|               | 2561          | 3/1             | -7        | 0.        | 0.        | 0.        | 1.011  | W   | L   |  |
|               | 2570          | 3/1             | -7        | 0.        | 0.        | 0.        | 1.022  | A   | L   |  |
|               | 2567          | 3/1             | -7        | 0.        | 0.        | 0.        | 1.036  | A   | LT  |  |
|               |               |                 | N         | 3         | 3         | 3         | 3      | 0   | 0   |  |
|               |               |                 | Mean      | 0.        | 0.        | 0.        | 1.023  | -   | -   |  |
|               |               |                 | Sdev      | 0.0       | 0.0       | 0.0       | 0.0125 | -   | -   |  |
| 800 mg/kg/day |               |                 |           |           |           |           |        |     |     |  |
|               | 2564          | 4/1             | -7        | 0.        | 0.        | 0.        | 1.020  | Y   | L   |  |
|               | 2565          | 4/1             | -7        | 0.        | 0.        | 3.        | 1.026  | A   | T   |  |
|               | 2569          | 4/1             | -7        | 0.        | 0.        | 2.        | 1.019  | Y   | T   |  |
|               | 2571          | 4/1             | -7        | 0.        | 0.        | 0.        | 1.011  | Y   | L   |  |
|               | 2573          | 4/1             | -7        | 0.        | 0.        | 0.        | 1.028  | Y   | LT  |  |
|               |               |                 | N         | 5         | 5         | 5         | 5      | 0   | 0   |  |
|               |               |                 | Mean      | 0.        | 0.        | 1.        | 1.021  | -   | -   |  |
|               |               |                 | Sdev      | 0.0       | 0.0       | 1.4       | 0.0067 | -   | -   |  |

UBG - UROBILINOGEN  
SG - SPECIFIC GRAVITY

BIL - BILIRUBIN  
COL - COLOUR

RBC - HEMOGLOBIN/RED BLOOD CELLS  
APP - APPEARANCE

CONFIDENTIAL

Appendix 9  
Day 28 Urine Data  
Test period

Session 1 (Scheduled)  
Fexinidazole

Study Number: 0505-2007

| M a l e s     |               |                 |           |        |          |           |           |           |           |           |  |
|---------------|---------------|-----------------|-----------|--------|----------|-----------|-----------|-----------|-----------|-----------|--|
| Dose Level    | Animal Number | Group/ Subgroup | Study Day | VOL mL | PH UNITS | WBC SCORE | NIT SCORE | PRO SCORE | GLU SCORE | KET SCORE |  |
| Vehicle       |               |                 |           |        |          |           |           |           |           |           |  |
|               | 2516          | 1/1             | 28        | 212.0  | 7.0      | 2.        | 0.        | 0.        | 0.        | 0.        |  |
|               | 2518          | 1/1             | 28        | 144.0  | 7.0      | 2.        | 1.        | 0.        | 0.        | 0.        |  |
|               | 2520          | 1/1             | 28        | 52.0   | 7.0      | 2.        | 0.        | 0.        | 0.        | 0.        |  |
|               | 2527          | 1/1             | 28        | 275.0  | 7.0      | 1.        | 0.        | 0.        | 0.        | 0.        |  |
|               | 2533          | 1/1             | 28        | 60.0   | 7.0      | 1.        | 1.        | 1.        | 0.        | 0.        |  |
|               |               |                 | N         | 5      | 5        | 5         | 5         | 5         | 5         | 5         |  |
|               |               |                 | Mean      | 148.6  | 7.0      | 2.        | 0.        | 0.        | 0.        | 0.        |  |
|               |               |                 | Sdev      | 96.44  | 0.00     | 0.5       | 0.5       | 0.4       | 0.0       | 0.0       |  |
| 50 mg/kg/day  |               |                 |           |        |          |           |           |           |           |           |  |
|               | 2514          | 2/1             | 28        | 558.0  | 7.0      | 2.        | 0.        | 0.        | 0.        | 0.        |  |
|               | 2521          | 2/1             | 28        | 18.0   | 7.0      | 2.        | 1.        | 1.        | 0.        | 0.        |  |
|               | 2529          | 2/1             | 28        | 98.0   | 7.0      | 2.        | 0.        | 1.        | 0.        | 0.        |  |
|               |               |                 | N         | 3      | 3        | 3         | 3         | 3         | 3         | 3         |  |
|               |               |                 | Mean      | 224.7  | 7.0      | 2.        | 0.        | 1.        | 0.        | 0.        |  |
|               |               |                 | Sdev      | 291.43 | 0.00     | 0.0       | 0.6       | 0.6       | 0.0       | 0.0       |  |
| 200 mg/kg/day |               |                 |           |        |          |           |           |           |           |           |  |
|               | 2515          | 3/1             | 28        | 221.0  | 6.5      | 2.        | 1.        | 1.        | 0.        | 0.        |  |
|               | 2523          | 3/1             | 28        | 454.0  | 6.5      | 1.        | 0.        | 0.        | 0.        | 0.        |  |
|               | 2526          | 3/1             | 28        | 252.0  | 7.0      | 0.        | 0.        | 0.        | 0.        | 0.        |  |
|               |               |                 | N         | 3      | 3        | 3         | 3         | 3         | 3         | 3         |  |
|               |               |                 | Mean      | 309.0  | 6.7      | 1.        | 0.        | 0.        | 0.        | 0.        |  |
|               |               |                 | Sdev      | 126.53 | 0.29     | 1.0       | 0.6       | 0.6       | 0.0       | 0.0       |  |
| 800 mg/kg/day |               |                 |           |        |          |           |           |           |           |           |  |
|               | 2517          | 4/1             | 28        | 197.0  | 7.0      | 1.        | 0.        | 0.        | 0.        | 0.        |  |
|               | 2519          | 4/1             | 28        | 149.0  | 7.0      | 2.        | 0.        | 0.        | 0.        | 0.        |  |
|               | 2525          | 4/1             | 28        | 478.0  | 7.0      | 2.        | 0.        | 0.        | 0.        | 0.        |  |
|               | 2528          | 4/1             | 28        | 432.0  | 7.0      | 2.        | 1.        | 1.        | 0.        | 0.        |  |
|               | 2530          | 4/1             | 28        | 522.0  | 7.0      | 2.        | 0.        | 0.        | 0.        | 0.        |  |
|               |               |                 | N         | 5      | 5        | 5         | 5         | 5         | 5         | 5         |  |
|               |               |                 | Mean      | 355.6  | 7.0      | 2.        | 0.        | 0.        | 0.        | 0.        |  |
|               |               |                 | Sdev      | 170.55 | 0.00     | 0.4       | 0.4       | 0.4       | 0.0       | 0.0       |  |

VOL - URINARY VOLUME  
NIT - NITRITES  
KET - KETONE BODIES

PH - PH  
PRO - PROTEINS

WBC - WHITE BLOOD CELLS  
GLU - GLUCOSE

CONFIDENTIAL

Appendix 9  
Day 28 Urine Data  
Test period

Session 1 (Scheduled)  
Fexinidazole

Study Number: 0505-2007

| M a l e s     |               |                 |           |           |           |           |        |     |     |  |
|---------------|---------------|-----------------|-----------|-----------|-----------|-----------|--------|-----|-----|--|
| Dose Level    | Animal Number | Group/ Subgroup | Study Day | UBG SCORE | BIL SCORE | RBC SCORE | SG     | COL | APP |  |
| Vehicle       |               |                 |           |           |           |           |        |     |     |  |
|               | 2516          | 1/1             | 28        | 0.        | 0.        | 0.        | 1.018  | A   | L   |  |
|               | 2518          | 1/1             | 28        | 0.        | 0.        | 1.        | 1.026  | Y   | T   |  |
|               | 2520          | 1/1             | 28        | 0.        | 0.        | 1.        | 1.018  | A   | L   |  |
|               | 2527          | 1/1             | 28        | 0.        | 0.        | 0.        | 1.022  | Y   | L   |  |
|               | 2533          | 1/1             | 28        | 0.        | 0.        | 2.        | 1.029  | A   | T   |  |
|               |               |                 | N         | 5         | 5         | 5         | 5      | 0   | 0   |  |
|               |               |                 | Mean      | 0.        | 0.        | 1.        | 1.023  | -   | -   |  |
|               |               |                 | Sdev      | 0.0       | 0.0       | 0.8       | 0.0049 | -   | -   |  |
| 50 mg/kg/day  |               |                 |           |           |           |           |        |     |     |  |
|               | 2514          | 2/1             | 28        | 0.        | 0.        | 1.        | 1.019  | A   | T   |  |
|               | 2521          | 2/1             | 28        | 0.        | 0.        | 0.        | 1.023  | B   | LT  |  |
|               | 2529          | 2/1             | 28        | 0.        | 0.        | 0.        | 1.037  | B   | LT  |  |
|               |               |                 | N         | 3         | 3         | 3         | 3      | 0   | 0   |  |
|               |               |                 | Mean      | 0.        | 0.        | 0.        | 1.026  | -   | -   |  |
|               |               |                 | Sdev      | 0.0       | 0.0       | 0.6       | 0.0095 | -   | -   |  |
| 200 mg/kg/day |               |                 |           |           |           |           |        |     |     |  |
|               | 2515          | 3/1             | 28        | 0.        | 0.        | 1.        | 1.024  | A   | T   |  |
|               | 2523          | 3/1             | 28        | 0.        | 0.        | 1.        | 1.017  | Y   | L   |  |
|               | 2526          | 3/1             | 28        | 0.        | 0.        | 0.        | 1.020  | A   | L   |  |
|               |               |                 | N         | 3         | 3         | 3         | 3      | 0   | 0   |  |
|               |               |                 | Mean      | 0.        | 0.        | 1.        | 1.020  | -   | -   |  |
|               |               |                 | Sdev      | 0.0       | 0.0       | 0.6       | 0.0035 | -   | -   |  |
| 800 mg/kg/day |               |                 |           |           |           |           |        |     |     |  |
|               | 2517          | 4/1             | 28        | 0.        | 0.        | 1.        | 1.017  | Y   | LT  |  |
|               | 2519          | 4/1             | 28        | 0.        | 0.        | 0.        | 1.023  | Y   | L   |  |
|               | 2525          | 4/1             | 28        | 0.        | 0.        | 0.        | 1.018  | A   | L   |  |
|               | 2528          | 4/1             | 28        | 0.        | 0.        | 0.        | 1.022  | A   | T   |  |
|               | 2530          | 4/1             | 28        | 0.        | 0.        | 0.        | 1.014  | Y   | L   |  |
|               |               |                 | N         | 5         | 5         | 5         | 5      | 0   | 0   |  |
|               |               |                 | Mean      | 0.        | 0.        | 0.        | 1.019  | -   | -   |  |
|               |               |                 | Sdev      | 0.0       | 0.0       | 0.4       | 0.0037 | -   | -   |  |

UBG - UROBILINOGEN  
SG - SPECIFIC GRAVITY

BIL - BILIRUBIN  
COL - COLOUR

RBC - HEMOGLOBIN/RED BLOOD CELLS  
APP - APPEARANCE

CONFIDENTIAL

Appendix 9  
Day 28 Urine Data  
Test period

Session 1 (Scheduled)  
Fexinidazole

Study Number: 0505-2007

F e m a l e s

| Dose Level    | Animal Number | Group/Subgroup | Study Day | VOL mL | PH UNITS | WBC SCORE | NIT SCORE | PRO SCORE | GLU SCORE | KET SCORE |
|---------------|---------------|----------------|-----------|--------|----------|-----------|-----------|-----------|-----------|-----------|
| Vehicle       |               |                |           |        |          |           |           |           |           |           |
|               | 2560          | 1/1            | 28        | 90.0   | 9.0      | 1.        | 0.        | 1.        | 0.        | 0.        |
|               | 2568          | 1/1            | 28        | 98.0   | 7.0      | 1.        | 0.        | 0.        | 0.        | 0.        |
|               | 2572          | 1/1            | 28        | 474.0  | 7.0      | 0.        | 0.        | 0.        | 0.        | 0.        |
|               | 2575          | 1/1            | 28        | 222.0  | 7.0      | 0.        | 0.        | 0.        | 0.        | 0.        |
|               | 2577          | 1/1            | 28        | 197.0  | 8.0      | 0.        | 0.        | 0.        | 0.        | 0.        |
|               |               |                | N         | 5      | 5        | 5         | 5         | 5         | 5         | 5         |
|               |               |                | Mean      | 216.2  | 7.6      | 0.        | 0.        | 0.        | 0.        | 0.        |
|               |               |                | Sdev      | 155.53 | 0.89     | 0.5       | 0.0       | 0.4       | 0.0       | 0.0       |
| 50 mg/kg/day  |               |                |           |        |          |           |           |           |           |           |
|               | 2562          | 2/1            | 28        | 174.0  | 7.0      | 0.        | 0.        | 0.        | 0.        | 0.        |
|               | 2563          | 2/1            | 28        | 146.0  | 7.0      | 0.        | 0.        | 0.        | 0.        | 0.        |
|               | 2576          | 2/1            | 28        | 175.0  | 7.0      | 2.        | 1.        | 1.        | 0.        | 0.        |
|               |               |                | N         | 3      | 3        | 3         | 3         | 3         | 3         | 3         |
|               |               |                | Mean      | 165.0  | 7.0      | 1.        | 0.        | 0.        | 0.        | 0.        |
|               |               |                | Sdev      | 16.46  | 0.00     | 1.2       | 0.6       | 0.6       | 0.0       | 0.0       |
| 200 mg/kg/day |               |                |           |        |          |           |           |           |           |           |
|               | 2561          | 3/1            | 28        | 138.0  | 7.0      | 0.        | 1.        | 0.        | 0.        | 0.        |
|               | 2570          | 3/1            | 28        | 94.0   | 8.0      | 2.        | 1.        | 1.        | 0.        | 0.        |
|               | 2567          | 3/1            | 28        | 270.0  | 8.0      | 0.        | 0.        | 0.        | 0.        | 0.        |
|               |               |                | N         | 3      | 3        | 3         | 3         | 3         | 3         | 3         |
|               |               |                | Mean      | 167.3  | 7.7      | 1.        | 1.        | 0.        | 0.        | 0.        |
|               |               |                | Sdev      | 91.59  | 0.58     | 1.2       | 0.6       | 0.6       | 0.0       | 0.0       |
| 800 mg/kg/day |               |                |           |        |          |           |           |           |           |           |
|               | 2564          | 4/1            | 28        | 290.0  | 7.0      | 0.        | 0.        | 0.        | 0.        | 0.        |
|               | 2565          | 4/1            | 28        | 16.0   | 6.5      | 0.        | 1.        | 2.        | 3.        | 1.        |
|               | 2569          | 4/1            | 28        | 233.0  | 7.0      | 2.        | 1.        | 1.        | 0.        | 0.        |
|               | 2571          | 4/1            | 28        | 280.0  | 7.0      | 0.        | 0.        | 0.        | 0.        | 0.        |
|               | 2573          | 4/1            | 28        | 135.0  | 8.0      | 0.        | 0.        | 0.        | 0.        | 0.        |
|               |               |                | N         | 5      | 5        | 5         | 5         | 5         | 5         | 5         |
|               |               |                | Mean      | 190.8  | 7.1      | 0.        | 0.        | 1.        | 1.        | 0.        |
|               |               |                | Sdev      | 115.38 | 0.55     | 0.9       | 0.5       | 0.9       | 1.3       | 0.4       |

VOL - URINARY VOLUME  
NIT - NITRITES  
KET - KETONE BODIES

PH - PH  
PRO - PROTEINS

WBC - WHITE BLOOD CELLS  
GLU - GLUCOSE

CONFIDENTIAL

Appendix 9  
Day 28 Urine Data  
Test period

Session 1 (Scheduled)  
Fexinidazole

Study Number: 0505-2007

| F e m a l e s |               |                 |           |           |           |           |        |     |     |  |
|---------------|---------------|-----------------|-----------|-----------|-----------|-----------|--------|-----|-----|--|
| Dose Level    | Animal Number | Group/ Subgroup | Study Day | UBG SCORE | BIL SCORE | RBC SCORE | SG     | COL | APP |  |
| Vehicle       |               |                 |           |           |           |           |        |     |     |  |
|               | 2560          | 1/1             | 28        | 0.        | 0.        | 1.        | 1.035  | A   | T   |  |
|               | 2568          | 1/1             | 28        | 0.        | 0.        | 0.        | 1.022  | Y   | L   |  |
|               | 2572          | 1/1             | 28        | 0.        | 0.        | 0.        | 1.019  | Y   | LT  |  |
|               | 2575          | 1/1             | 28        | 0.        | 0.        | 0.        | 1.035  | A   | LT  |  |
|               | 2577          | 1/1             | 28        | 0.        | 0.        | 0.        | 1.028  | Y   | L   |  |
|               |               |                 | N         | 5         | 5         | 5         | 5      | 0   | 0   |  |
|               |               |                 | Mean      | 0.        | 0.        | 0.        | 1.028  | -   | -   |  |
|               |               |                 | Sdev      | 0.0       | 0.0       | 0.4       | 0.0073 | -   | -   |  |
| 50 mg/kg/day  |               |                 |           |           |           |           |        |     |     |  |
|               | 2562          | 2/1             | 28        | 0.        | 0.        | 0.        | 1.010  | W   | L   |  |
|               | 2563          | 2/1             | 28        | 0.        | 0.        | 2.        | 1.008  | W   | L   |  |
|               | 2576          | 2/1             | 28        | 0.        | 0.        | 2.        | 1.027  | A   | T   |  |
|               |               |                 | N         | 3         | 3         | 3         | 3      | 0   | 0   |  |
|               |               |                 | Mean      | 0.        | 0.        | 1.        | 1.015  | -   | -   |  |
|               |               |                 | Sdev      | 0.0       | 0.0       | 1.2       | 0.0104 | -   | -   |  |
| 200 mg/kg/day |               |                 |           |           |           |           |        |     |     |  |
|               | 2561          | 3/1             | 28        | 0.        | 0.        | 0.        | 1.032  | A   | L   |  |
|               | 2570          | 3/1             | 28        | 0.        | 0.        | 1.        | 1.029  | A   | T   |  |
|               | 2567          | 3/1             | 28        | 0.        | 0.        | 0.        | 1.018  | Y   | L   |  |
|               |               |                 | N         | 3         | 3         | 3         | 3      | 0   | 0   |  |
|               |               |                 | Mean      | 0.        | 0.        | 0.        | 1.026  | -   | -   |  |
|               |               |                 | Sdev      | 0.0       | 0.0       | 0.6       | 0.0074 | -   | -   |  |
| 800 mg/kg/day |               |                 |           |           |           |           |        |     |     |  |
|               | 2564          | 4/1             | 28        | 0.        | 0.        | 0.        | 1.015  | Y   | L   |  |
|               | 2565          | 4/1             | 28        | 0.        | 0.        | 2.        | 1.035  | Y   | T   |  |
|               | 2569          | 4/1             | 28        | 0.        | 0.        | 2.        | 1.019  | A   | T   |  |
|               | 2571          | 4/1             | 28        | 0.        | 0.        | 0.        | 1.016  | Y   | L   |  |
|               | 2573          | 4/1             | 28        | 0.        | 0.        | 0.        | 1.022  | Y   | L   |  |
|               |               |                 | N         | 5         | 5         | 5         | 5      | 0   | 0   |  |
|               |               |                 | Mean      | 0.        | 0.        | 1.        | 1.021  | -   | -   |  |
|               |               |                 | Sdev      | 0.0       | 0.0       | 1.1       | 0.0081 | -   | -   |  |

UBG - UROBILINOGEN  
SG - SPECIFIC GRAVITY

BIL - BILIRUBIN  
COL - COLOUR

RBC - HEMOGLOBIN/RED BLOOD CELLS  
APP - APPEARANCE

CONFIDENTIAL

Appendix 9  
Day 42 Urine Data  
Test period

Session 1 (Scheduled)  
Fexinidazole

Study Number: 0505-2007

| M a l e s     |               |                 |           |        |          |           |           |           |           |           |  |
|---------------|---------------|-----------------|-----------|--------|----------|-----------|-----------|-----------|-----------|-----------|--|
| Dose Level    | Animal Number | Group/ Subgroup | Study Day | VOL mL | PH UNITS | WBC SCORE | NIT SCORE | PRO SCORE | GLU SCORE | KET SCORE |  |
| Vehicle       |               |                 |           |        |          |           |           |           |           |           |  |
|               | 2527          | 1/1             | 42        | 194.0  | 6.5      | 2.        | 0.        | 0.        | 0.        | 0.        |  |
|               | 2533          | 1/1             | 42        | 638.0  | 7.0      | 2.        | 0.        | 0.        | 0.        | 0.        |  |
|               |               |                 | N         | 2      | 2        | 2         | 2         | 2         | 2         | 2         |  |
|               |               |                 | Mean      | 416.0  | 6.8      | 2.        | 0.        | 0.        | 0.        | 0.        |  |
|               |               |                 | Sdev      | 313.96 | 0.35     | 0.0       | 0.0       | 0.0       | 0.0       | 0.0       |  |
| 800 mg/kg/day |               |                 |           |        |          |           |           |           |           |           |  |
|               | 2528          | 4/1             | 42        | 148.0  | 7.0      | 0.        | 0.        | 0.        | 0.        | 0.        |  |
|               | 2530          | 4/1             | 42        | 112.0  | 8.0      | 2.        | 1.        | 1.        | 0.        | 1.        |  |
|               |               |                 | N         | 2      | 2        | 2         | 2         | 2         | 2         | 2         |  |
|               |               |                 | Mean      | 130.0  | 7.5      | 1.        | 1.        | 1.        | 0.        | 1.        |  |
|               |               |                 | Sdev      | 25.46  | 0.71     | 1.4       | 0.7       | 0.7       | 0.0       | 0.7       |  |

VOL - URINARY VOLUME  
NIT - NITRITES  
KET - KETONE BODIES

PH - PH  
PRO - PROTEINS

WBC - WHITE BLOOD CELLS  
GLU - GLUCOSE



CONFIDENTIAL

Appendix 9  
Day 42 Urine Data  
Test period

Session 1 (Scheduled)  
Fexinidazole

Study Number: 0505-2007

| M a l e s     |               |                 |           |           |           |           |        |     |     |
|---------------|---------------|-----------------|-----------|-----------|-----------|-----------|--------|-----|-----|
| Dose Level    | Animal Number | Group/ Subgroup | Study Day | UBG SCORE | BIL SCORE | RBC SCORE | SG     | COL | APP |
| Vehicle       |               |                 |           |           |           |           |        |     |     |
|               | 2527          | 1/1             | 42        | 0.        | 0.        | 0.        | 1.025  | Y   | L   |
|               | 2533          | 1/1             | 42        | 0.        | 0.        | 1.        | 1.014  | Y   | T   |
|               |               |                 | N         | 2         | 2         | 2         | 2      | 0   | 0   |
|               |               |                 | Mean      | 0.        | 0.        | 1.        | 1.020  | -   | -   |
|               |               |                 | Sdev      | 0.0       | 0.0       | 0.7       | 0.0078 | -   | -   |
| 800 mg/kg/day |               |                 |           |           |           |           |        |     |     |
|               | 2528          | 4/1             | 42        | 0.        | 0.        | 0.        | 1.036  | A   | LT  |
|               | 2530          | 4/1             | 42        | 0.        | 0.        | 2.        | 1.025  | A   | T   |
|               |               |                 | N         | 2         | 2         | 2         | 2      | 0   | 0   |
|               |               |                 | Mean      | 0.        | 0.        | 1.        | 1.031  | -   | -   |
|               |               |                 | Sdev      | 0.0       | 0.0       | 1.4       | 0.0078 | -   | -   |

UBG - UROBILINOGEN  
SG - SPECIFIC GRAVITY

BIL - BILIRUBIN  
COL - COLOUR

RBC - HEMOGLOBIN/RED BLOOD CELLS  
APP - APPEARANCE

CONFIDENTIAL

Appendix 9  
Day 42 Urine Data  
Test period

Session 1 (Scheduled)  
Fexinidazole

Study Number: 0505-2007

F e m a l e s

| Dose Level    | Animal Number | Group/ Subgroup | Study Day | VOL mL | PH UNITS | WBC SCORE | NIT SCORE | PRO SCORE | GLU SCORE | KET SCORE |
|---------------|---------------|-----------------|-----------|--------|----------|-----------|-----------|-----------|-----------|-----------|
| Vehicle       |               |                 |           |        |          |           |           |           |           |           |
|               | 2575          | 1/1             | 42        | 152.0  | 9.0      | 1.        | 0.        | 0.        | 0.        | 0.        |
|               | 2577          | 1/1             | 42        | 240.0  | 8.0      | 2.        | 0.        | 0.        | 0.        | 0.        |
|               |               |                 | N         | 2      | 2        | 2         | 2         | 2         | 2         | 2         |
|               |               |                 | Mean      | 196.0  | 8.5      | 2.        | 0.        | 0.        | 0.        | 0.        |
|               |               |                 | Sdev      | 62.23  | 0.71     | 0.7       | 0.0       | 0.0       | 0.0       | 0.0       |
| 800 mg/kg/day |               |                 |           |        |          |           |           |           |           |           |
|               | 2571          | 4/1             | 42        | 325.0  | 7.0      | 0.        | 0.        | 0.        | 0.        | 0.        |
|               | 2573          | 4/1             | 42        | 148.0  | 9.0      | 0.        | 0.        | 0.        | 0.        | 0.        |
|               |               |                 | N         | 2      | 2        | 2         | 2         | 2         | 2         | 2         |
|               |               |                 | Mean      | 236.5  | 8.0      | 0.        | 0.        | 0.        | 0.        | 0.        |
|               |               |                 | Sdev      | 125.16 | 1.41     | 0.0       | 0.0       | 0.0       | 0.0       | 0.0       |

VOL - URINARY VOLUME  
NIT - NITRITES  
KET - KETONE BODIES

PH - PH  
PRO - PROTEINS

WBC - WHITE BLOOD CELLS  
GLU - GLUCOSE

CONFIDENTIAL

Appendix 9  
Day 42 Urine Data  
Test period

Session 1 (Scheduled)  
Fexinidazole

Study Number: 0505-2007

| F e m a l e s |               |                 |           |           |           |           |        |     |     |
|---------------|---------------|-----------------|-----------|-----------|-----------|-----------|--------|-----|-----|
| Dose Level    | Animal Number | Group/ Subgroup | Study Day | UBG SCORE | BIL SCORE | RBC SCORE | SG     | COL | APP |
| Vehicle       |               |                 |           |           |           |           |        |     |     |
|               | 2575          | 1/1             | 42        | 0.        | 0.        | 2.        | 1.027  | A   | T   |
|               | 2577          | 1/1             | 42        | 0.        | 0.        | 0.        | 1.024  | Y   | L   |
|               |               |                 | N         | 2         | 2         | 2         | 2      | 0   | 0   |
|               |               |                 | Mean      | 0.        | 0.        | 1.        | 1.026  | -   | -   |
|               |               |                 | Sdev      | 0.0       | 0.0       | 1.4       | 0.0021 | -   | -   |
| 800 mg/kg/day |               |                 |           |           |           |           |        |     |     |
|               | 2571          | 4/1             | 42        | 0.        | 0.        | 0.        | 1.015  | Y   | L   |
|               | 2573          | 4/1             | 42        | 0.        | 0.        | 0.        | 1.024  | Y   | L   |
|               |               |                 | N         | 2         | 2         | 2         | 2      | 0   | 0   |
|               |               |                 | Mean      | 0.        | 0.        | 0.        | 1.020  | -   | -   |
|               |               |                 | Sdev      | 0.0       | 0.0       | 0.0       | 0.0064 | -   | -   |

UBG - UROBILINOGEN  
SG - SPECIFIC GRAVITY

BIL - BILIRUBIN  
COL - COLOUR

RBC - HEMOGLOBIN/RED BLOOD CELLS  
APP - APPEARANCE

## ***Appendix 10 Absolute Organ Weights***

CONFIDENTIAL

Appendix 10  
 Absolute Organ Weights (g)  
 Test period  
 Days 29 Interim Sacrifice

Fexinidazole

Study Number: 0505-2007

| Dose Level    | Animal Number | Group/ Subgroup | Terminal Body Wt (kg) | SPLEEN | THYMUS | KIDNEYS | LIVER  | ADRENALS |
|---------------|---------------|-----------------|-----------------------|--------|--------|---------|--------|----------|
| M a l e s     |               |                 |                       |        |        |         |        |          |
| Vehicle       | 2516          | 1/1             | 8.41                  | 21.81  | 8.690  | 40.50   | 238.06 | 1.160    |
|               | 2518          | 1/1             | 8.86                  | 25.18  | 4.180  | 43.29   | 301.45 | 1.410    |
|               | 2520          | 1/1             | 8.14                  | 18.50  | 2.320  | 34.07   | 313.63 | 1.210    |
|               |               | N               | 3                     | 3      | 3      | 3       | 3      | 3        |
|               |               | Mean            | 8.47                  | 21.83  | 5.063  | 39.29   | 284.38 | 1.260    |
|               |               | Sdev            | 0.366                 | 3.340  | 3.2756 | 4.728   | 40.574 | 0.1323   |
| 50 mg/kg/day  | 2514          | 2/1             | 9.45                  | 24.80  | 3.110  | 48.91   | 262.00 | 1.180    |
|               | 2521          | 2/1             | 7.58                  | 27.20  | 3.870  | 37.44   | 258.76 | 1.320    |
|               | 2529          | 2/1             | 7.59                  | 19.81  | 2.020  | 39.24   | 241.26 | 1.200    |
|               |               | N               | 3                     | 3      | 3      | 3       | 3      | 3        |
|               |               | Mean            | 8.21                  | 23.94  | 3.000  | 41.86   | 254.01 | 1.233    |
|               |               | Sdev            | 1.077                 | 3.770  | 0.9299 | 6.169   | 11.157 | 0.0757   |
| 200 mg/kg/day | 2515          | 3/1             | 8.60                  | 24.19  | 1.770  | 35.71   | 269.07 | 1.370    |
|               | 2523          | 3/1             | 8.10                  | 13.20  | 1.180  | 37.26   | 325.78 | 1.830    |
|               | 2526          | 3/1             | 7.60                  | 18.52  | 1.500  | 36.02   | 247.60 | 1.060    |
|               |               | N               | 3                     | 3      | 3      | 3       | 3      | 3        |
|               |               | Mean            | 8.10                  | 18.64  | 1.483  | 36.33   | 280.82 | 1.420    |
|               |               | Sdev            | 0.504                 | 5.496  | 0.2954 | 0.820   | 40.392 | 0.3874   |
| 800 mg/kg/day | 2517          | 4/1             | 6.87                  | 10.92  | 1.580  | 35.25   | 330.48 | 1.620    |
|               | 2519          | 4/1             | 7.71                  | 24.45  | 2.640  | 37.85   | 291.59 | 1.340    |
|               | 2525          | 4/1             | 9.33                  | 22.29  | 3.240  | 42.77   | 338.25 | 1.420    |
|               |               | N               | 3                     | 3      | 3      | 3       | 3      | 3        |
|               |               | Mean            | 7.97                  | 19.22  | 2.487  | 38.62   | 320.11 | 1.460    |
|               |               | Sdev            | 1.249                 | 7.269  | 0.8406 | 3.819   | 25.000 | 0.1442   |

Note: Data collected using grace days.

CONFIDENTIAL

Appendix 10  
 Absolute Organ Weights (g)  
 Test period  
 Days 29 Interim Sacrifice

Fexinidazole

Study Number: 0505-2007

| Dose Level    | Animal Number | Group/Subgroup | Terminal Body Wt (kg) | HEART | BRAIN  | TESTES | PROSTATE |
|---------------|---------------|----------------|-----------------------|-------|--------|--------|----------|
| M a l e s     |               |                |                       |       |        |        |          |
| Vehicle       |               |                |                       |       |        |        |          |
|               | 2516          | 1/1            | 8.41                  | 63.18 | 67.65  | 12.63  | 4.44     |
|               | 2518          | 1/1            | 8.86                  | 65.27 | 86.97  | 13.06  | 3.42     |
|               | 2520          | 1/1            | 8.14                  | 59.25 | 72.22  | 11.09  | 2.46     |
|               |               | N              | 3                     | 3     | 3      | 3      | 3        |
|               |               | Mean           | 8.47                  | 62.57 | 75.61  | 12.26  | 3.44     |
|               |               | Sdev           | 0.366                 | 3.057 | 10.097 | 1.036  | 0.990    |
| 50 mg/kg/day  |               |                |                       |       |        |        |          |
|               | 2514          | 2/1            | 9.45                  | 74.02 | 67.20  | 15.74  | 5.19     |
|               | 2521          | 2/1            | 7.58                  | 62.67 | 69.75  | 12.99  | 3.72     |
|               | 2529          | 2/1            | 7.59                  | 67.21 | 74.03  | 10.06  | 5.06     |
|               |               | N              | 3                     | 3     | 3      | 3      | 3        |
|               |               | Mean           | 8.21                  | 67.97 | 70.33  | 12.93  | 4.66     |
|               |               | Sdev           | 1.077                 | 5.713 | 3.451  | 2.840  | 0.814    |
| 200 mg/kg/day |               |                |                       |       |        |        |          |
|               | 2515          | 3/1            | 8.60                  | 69.10 | 72.18  | 11.97  | 3.33     |
|               | 2523          | 3/1            | 8.10                  | 63.49 | 78.10  | 5.93   | 2.50     |
|               | 2526          | 3/1            | 7.60                  | 57.78 | 68.28  | 14.92  | 4.92     |
|               |               | N              | 3                     | 3     | 3      | 3      | 3        |
|               |               | Mean           | 8.10                  | 63.46 | 72.85  | 10.94  | 3.58     |
|               |               | Sdev           | 0.504                 | 5.660 | 4.945  | 4.583  | 1.230    |
| 800 mg/kg/day |               |                |                       |       |        |        |          |
|               | 2517          | 4/1            | 6.87                  | 60.61 | 72.09  | 5.06   | 1.41     |
|               | 2519          | 4/1            | 7.71                  | 59.27 | 53.37  | 12.22  | 4.01     |
|               | 2525          | 4/1            | 9.33                  | 61.36 | 74.35  | 16.09  | 5.30     |
|               |               | N              | 3                     | 3     | 3      | 3      | 3        |
|               |               | Mean           | 7.97                  | 60.41 | 66.60  | 11.12  | 3.57     |
|               |               | Sdev           | 1.249                 | 1.059 | 11.516 | 5.596  | 1.981    |

Note: Data collected using grace days.

CONFIDENTIAL

Appendix 10  
 Absolute Organ Weights (g)  
 Test period  
 Days 29 Interim Sacrifice

Fexinidazole

Study Number: 0505-2007

| Dose Level    | Animal Number | Group/ Subgroup | Terminal Body Wt (kg) | SPLEEN | THYMUS | KIDNEYS | LIVER  |
|---------------|---------------|-----------------|-----------------------|--------|--------|---------|--------|
| F e m a l e s |               |                 |                       |        |        |         |        |
| Vehicle       |               |                 |                       |        |        |         |        |
|               | 2560          | 1/1             | 6.35                  | 15.28  | 2.260  | 32.03   | 261.69 |
|               | 2568          | 1/1             | 6.90                  | 20.57  | 1.670  | 32.79   | 236.65 |
|               | 2572          | 1/1             | 6.60                  | 14.81  | 0.770  | 30.79   | 247.06 |
|               |               | N               | 3                     | 3      | 3      | 3       | 3      |
|               |               | Mean            | 6.61                  | 16.89  | 1.567  | 31.87   | 248.47 |
|               |               | Sdev            | 0.276                 | 3.199  | 0.7504 | 1.010   | 12.579 |
| 50 mg/kg/day  |               |                 |                       |        |        |         |        |
|               | 2562          | 2/1             | 6.57                  | 19.48  | 1.960  | 30.90   | 200.63 |
|               | 2563          | 2/1             | 7.61                  | 20.35  | 2.660  | 32.86   | 253.51 |
|               | 2576          | 2/1             | 8.38                  | 32.86  | 4.990  | 36.69   | 292.62 |
|               |               | N               | 3                     | 3      | 3      | 3       | 3      |
|               |               | Mean            | 7.52                  | 24.23  | 3.203  | 33.48   | 248.92 |
|               |               | Sdev            | 0.907                 | 7.486  | 1.5864 | 2.945   | 46.166 |
| 200 mg/kg/day |               |                 |                       |        |        |         |        |
|               | 2561          | 3/1             | 7.10                  | 16.59  | 3.720  | 34.40   | 252.23 |
|               | 2570          | 3/1             | 6.65                  | 13.26  | 0.870  | 34.85   | 280.27 |
|               | 2567          | 3/1             | 8.00                  | 29.83  | 2.150  | 39.69   | 313.86 |
|               |               | N               | 3                     | 3      | 3      | 3       | 3      |
|               |               | Mean            | 7.25                  | 19.89  | 2.247  | 36.31   | 282.12 |
|               |               | Sdev            | 0.688                 | 8.765  | 1.4275 | 2.933   | 30.857 |
| 800 mg/kg/day |               |                 |                       |        |        |         |        |
|               | 2564          | 4/1             | 6.10                  | 16.09  | 0.940  | 26.90   | 216.61 |
|               | 2565          | 4/1             | 6.11                  | 13.41  | 1.510  | 29.96   | 257.76 |
|               | 2569          | 4/1             | 7.65                  | 20.66  | 1.520  | 32.53   | 274.32 |
|               |               | N               | 3                     | 3      | 3      | 3       | 3      |
|               |               | Mean            | 6.62                  | 16.72  | 1.323  | 29.80   | 249.56 |
|               |               | Sdev            | 0.889                 | 3.666  | 0.3320 | 2.819   | 29.715 |

Note: Data collected using grace days.

CONFIDENTIAL

Appendix 10  
 Absolute Organ Weights (g)  
 Test period  
 Days 29 Interim Sacrifice

Fexinidazole

Study Number: 0505-2007

| Dose Level    | Animal Number | Group/ Subgroup | Terminal Body Wt (kg) | ADRENALS | HEART  | BRAIN | OVARIES |
|---------------|---------------|-----------------|-----------------------|----------|--------|-------|---------|
| F e m a l e s |               |                 |                       |          |        |       |         |
| Vehicle       |               |                 |                       |          |        |       |         |
|               | 2560          | 1/1             | 6.35                  | 1.350    | 58.70  | 71.76 | 0.917   |
|               | 2568          | 1/1             | 6.90                  | 1.380    | 55.94  | 74.11 | 0.852   |
|               | 2572          | 1/1             | 6.60                  | 1.130    | 55.64  | 76.37 | 0.592   |
|               |               | N               | 3                     | 3        | 3      | 3     | 3       |
|               |               | Mean            | 6.61                  | 1.287    | 56.76  | 74.08 | 0.787   |
|               |               | Sdev            | 0.276                 | 0.1365   | 1.687  | 2.305 | 0.1718  |
| 50 mg/kg/day  |               |                 |                       |          |        |       |         |
|               | 2562          | 2/1             | 6.57                  | 1.210    | 56.94  | 71.89 | 1.725   |
|               | 2563          | 2/1             | 7.61                  | 1.030    | 61.71  | 64.09 | 1.793   |
|               | 2576          | 2/1             | 8.38                  | 1.180    | 59.70  | 71.07 | 2.164   |
|               |               | N               | 3                     | 3        | 3      | 3     | 3       |
|               |               | Mean            | 7.52                  | 1.140    | 59.45  | 69.02 | 1.894   |
|               |               | Sdev            | 0.907                 | 0.0964   | 2.395  | 4.286 | 0.2362  |
| 200 mg/kg/day |               |                 |                       |          |        |       |         |
|               | 2561          | 3/1             | 7.10                  | 1.510    | 54.28  | 77.32 | 1.458   |
|               | 2570          | 3/1             | 6.65                  | 1.310    | 54.44  | 74.16 | 1.400   |
|               | 2567          | 3/1             | 8.00                  | 1.050    | 72.23  | 74.43 | 2.144   |
|               |               | N               | 3                     | 3        | 3      | 3     | 3       |
|               |               | Mean            | 7.25                  | 1.290    | 60.32  | 75.30 | 1.667   |
|               |               | Sdev            | 0.688                 | 0.2307   | 10.318 | 1.752 | 0.4140  |
| 800 mg/kg/day |               |                 |                       |          |        |       |         |
|               | 2564          | 4/1             | 6.10                  | 1.170    | 50.79  | 63.38 | 1.127   |
|               | 2565          | 4/1             | 6.11                  | 1.310    | 46.98  | 60.88 | 1.355   |
|               | 2569          | 4/1             | 7.65                  | 1.160    | 63.81  | 76.33 | 2.479   |
|               |               | N               | 3                     | 3        | 3      | 3     | 3       |
|               |               | Mean            | 6.62                  | 1.213    | 53.86  | 66.86 | 1.654   |
|               |               | Sdev            | 0.889                 | 0.0839   | 8.825  | 8.293 | 0.7240  |

Note: Data collected using grace days.



CONFIDENTIAL

Appendix 10  
 Absolute Organ Weights (g)  
 Test period  
 Days 43 Final Sacrifice

Fexinidazole

Study Number: 0505-2007

| Dose Level    | Animal Number | Group/ Subgroup | Terminal Body Wt (kg) | SPLEEN | THYMUS | KIDNEYS | LIVER  | ADRENALS |
|---------------|---------------|-----------------|-----------------------|--------|--------|---------|--------|----------|
| M a l e s     |               |                 |                       |        |        |         |        |          |
| Vehicle       | 2527          | 1/1             | 7.87                  | 20.01  | 3.630  | 33.39   | 254.38 | 1.110    |
|               | 2533          | 1/1             | 7.38                  | 17.80  | 1.530  | 31.24   | 239.15 | 1.170    |
|               |               | N               | 2                     | 2      | 2      | 2       | 2      | 2        |
|               |               | Mean            | 7.62                  | 18.91  | 2.580  | 32.32   | 246.77 | 1.140    |
|               |               | Sdev            | 0.351                 | 1.563  | 1.4849 | 1.520   | 10.769 | 0.0424   |
| 800 mg/kg/day | 2528          | 4/1             | 8.53                  | 20.32  | 1.600  | 45.71   | 281.35 | 1.050    |
|               | 2530          | 4/1             | 6.66                  | 14.22  | 1.160  | 34.01   | 208.89 | 1.170    |
|               |               | N               | 2                     | 2      | 2      | 2       | 2      | 2        |
|               |               | Mean            | 7.60                  | 17.27  | 1.380  | 39.86   | 245.12 | 1.110    |
|               |               | Sdev            | 1.323                 | 4.313  | 0.3111 | 8.273   | 51.237 | 0.0849   |

Note: Data collected using grace days.

CONFIDENTIAL

Appendix 10  
 Absolute Organ Weights (g)  
 Test period  
 Days 43 Final Sacrifice

Fexinidazole

Study Number: 0505-2007

| Dose Level    | Animal Number | Group/ Subgroup | Terminal Body Wt (kg) | HEART | BRAIN | TESTES | PROSTATE |
|---------------|---------------|-----------------|-----------------------|-------|-------|--------|----------|
| M a l e s     |               |                 |                       |       |       |        |          |
| Vehicle       |               |                 |                       |       |       |        |          |
|               | 2527          | 1/1             | 7.87                  | 71.87 | 65.23 | 12.73  | 3.65     |
|               | 2533          | 1/1             | 7.38                  | 68.17 | 73.93 | 14.52  | 1.11     |
|               |               | N               | 2                     | 2     | 2     | 2      | 2        |
|               |               | Mean            | 7.62                  | 70.02 | 69.58 | 13.63  | 2.38     |
|               |               | Sdev            | 0.351                 | 2.616 | 6.152 | 1.266  | 1.796    |
| 800 mg/kg/day |               |                 |                       |       |       |        |          |
|               | 2528          | 4/1             | 8.53                  | 71.37 | 75.33 | 10.36  | 3.36     |
|               | 2530          | 4/1             | 6.66                  | 62.68 | 63.41 | 10.08  | 0.79     |
|               |               | N               | 2                     | 2     | 2     | 2      | 2        |
|               |               | Mean            | 7.60                  | 67.03 | 69.37 | 10.22  | 2.08     |
|               |               | Sdev            | 1.323                 | 6.145 | 8.429 | 0.198  | 1.817    |

Note: Data collected using grace days.

CONFIDENTIAL

Appendix 10  
 Absolute Organ Weights (g)  
 Test period  
 Days 43 Final Sacrifice

Fexinidazole

Study Number: 0505-2007

| Dose Level    | Animal Number | Group/ Subgroup | Terminal Body Wt (kg) | SPLEEN | THYMUS | KIDNEYS | LIVER  |
|---------------|---------------|-----------------|-----------------------|--------|--------|---------|--------|
| F e m a l e s |               |                 |                       |        |        |         |        |
| Vehicle       |               |                 |                       |        |        |         |        |
|               | 2575          | 1/1             | 8.11                  | 21.99  | 3.350  | 35.42   | 265.17 |
|               | 2577          | 1/1             | 8.55                  | 28.82  | 2.740  | 35.07   | 276.35 |
|               |               | N               | 2                     | 2      | 2      | 2       | 2      |
|               |               | Mean            | 8.33                  | 25.41  | 3.045  | 35.25   | 270.76 |
|               |               | Sdev            | 0.310                 | 4.830  | 0.4313 | 0.247   | 7.905  |
| 800 mg/kg/day |               |                 |                       |        |        |         |        |
|               | 2571          | 4/1             | 7.32                  | 20.46  | 2.570  | 31.94   | 271.37 |
|               | 2573          | 4/1             | 6.83                  | 20.67  | 1.500  | 31.65   | 255.81 |
|               |               | N               | 2                     | 2      | 2      | 2       | 2      |
|               |               | Mean            | 7.07                  | 20.57  | 2.035  | 31.80   | 263.59 |
|               |               | Sdev            | 0.348                 | 0.148  | 0.7566 | 0.205   | 11.003 |

Note: Data collected using grace days.

CONFIDENTIAL

Appendix 10  
 Absolute Organ Weights (g)  
 Test period  
 Days 43 Final Sacrifice

Fexinidazole

Study Number: 0505-2007

| Dose Level    | Animal Number | Group/ Subgroup | Terminal Body Wt (kg) | ADRENALS | HEART | BRAIN | OVARIES |
|---------------|---------------|-----------------|-----------------------|----------|-------|-------|---------|
| F e m a l e s |               |                 |                       |          |       |       |         |
| Vehicle       | 2575          | 1/1             | 8.11                  | 0.870    | 67.16 | 71.39 | 2.276   |
|               | 2577          | 1/1             | 8.55                  | 1.200    | 60.34 | 64.64 | 1.686   |
|               |               | N               | 2                     | 2        | 2     | 2     | 2       |
|               |               | Mean            | 8.33                  | 1.035    | 63.75 | 68.02 | 1.981   |
|               |               | Sdev            | 0.310                 | 0.2333   | 4.822 | 4.773 | 0.4171  |
| 800 mg/kg/day | 2571          | 4/1             | 7.32                  | 1.170    | 57.15 | 68.88 | 1.625   |
|               | 2573          | 4/1             | 6.83                  | 1.130    | 46.78 | 68.29 | 1.542   |
|               |               | N               | 2                     | 2        | 2     | 2     | 2       |
|               |               | Mean            | 7.07                  | 1.150    | 51.97 | 68.59 | 1.583   |
|               |               | Sdev            | 0.348                 | 0.0283   | 7.333 | 0.417 | 0.0591  |

Note: Data collected using grace days.

## ***Appendix 11 Organ/Terminal Body Weight Ratios***

CONFIDENTIAL

Appendix 11  
Relative Organ Weights (% Body Weight)  
Test period  
Days 29 Interim Sacrifice

Fexinidazole

Study Number: 0505-2007

| Dose Level    | Animal Number | Group/Subgroup | Terminal Body Wt (kg) | SPLEEN | THYMUS | KIDNEYS | LIVER | ADRENALS |
|---------------|---------------|----------------|-----------------------|--------|--------|---------|-------|----------|
| M a l e s     |               |                |                       |        |        |         |       |          |
| Vehicle       | 2516          | 1/1            | 8.41                  | 0.26   | 0.103  | 0.48    | 2.83  | 0.014    |
|               | 2518          | 1/1            | 8.86                  | 0.28   | 0.047  | 0.49    | 3.40  | 0.016    |
|               | 2520          | 1/1            | 8.14                  | 0.23   | 0.029  | 0.42    | 3.85  | 0.015    |
|               |               | N              | 3                     | 3      | 3      | 3       | 3     | 3        |
|               |               | Mean           | 8.47                  | 0.26   | 0.060  | 0.46    | 3.36  | 0.015    |
|               |               | Sdev           | 0.366                 | 0.028  | 0.0390 | 0.039   | 0.511 | 0.0011   |
| 50 mg/kg/day  | 2514          | 2/1            | 9.45                  | 0.26   | 0.033  | 0.52    | 2.77  | 0.012    |
|               | 2521          | 2/1            | 7.58                  | 0.36   | 0.051  | 0.49    | 3.41  | 0.017    |
|               | 2529          | 2/1            | 7.59                  | 0.26   | 0.027  | 0.52    | 3.18  | 0.016    |
|               |               | N              | 3                     | 3      | 3      | 3       | 3     | 3        |
|               |               | Mean           | 8.21                  | 0.29   | 0.037  | 0.51    | 3.12  | 0.015    |
|               |               | Sdev           | 1.077                 | 0.056  | 0.0127 | 0.013   | 0.324 | 0.0025   |
| 200 mg/kg/day | 2515          | 3/1            | 8.60                  | 0.28   | 0.021  | 0.42    | 3.13  | 0.016    |
|               | 2523          | 3/1            | 8.10                  | 0.16   | 0.015  | 0.46    | 4.02  | 0.023    |
|               | 2526          | 3/1            | 7.60                  | 0.24   | 0.020  | 0.47    | 3.26  | 0.014    |
|               |               | N              | 3                     | 3      | 3      | 3       | 3     | 3        |
|               |               | Mean           | 8.10                  | 0.23   | 0.018  | 0.45    | 3.47  | 0.017    |
|               |               | Sdev           | 0.504                 | 0.060  | 0.0033 | 0.031   | 0.483 | 0.0045   |
| 800 mg/kg/day | 2517          | 4/1            | 6.87                  | 0.16   | 0.023  | 0.51    | 4.81  | 0.024    |
|               | 2519          | 4/1            | 7.71                  | 0.32   | 0.034  | 0.49    | 3.78  | 0.017    |
|               | 2525          | 4/1            | 9.33                  | 0.24   | 0.035  | 0.46    | 3.63  | 0.015    |
|               |               | N              | 3                     | 3      | 3      | 3       | 3     | 3        |
|               |               | Mean           | 7.97                  | 0.24   | 0.031  | 0.49    | 4.07  | 0.019    |
|               |               | Sdev           | 1.249                 | 0.079  | 0.0066 | 0.027   | 0.642 | 0.0043   |

Note: Data collected using grace days.

CONFIDENTIAL

Appendix 11  
Relative Organ Weights (% Body Weight)  
Test period  
Days 29 Interim Sacrifice

Fexinidazole

Study Number: 0505-2007

| Dose Level    | Animal Number | Group/Subgroup | Terminal Body Wt (kg) | HEART | BRAIN | TESTES | PROSTATE |
|---------------|---------------|----------------|-----------------------|-------|-------|--------|----------|
| M a l e s     |               |                |                       |       |       |        |          |
| Vehicle       |               |                |                       |       |       |        |          |
|               | 2516          | 1/1            | 8.41                  | 0.75  | 0.80  | 0.15   | 0.05     |
|               | 2518          | 1/1            | 8.86                  | 0.74  | 0.98  | 0.15   | 0.04     |
|               | 2520          | 1/1            | 8.14                  | 0.73  | 0.89  | 0.14   | 0.03     |
|               |               | N              | 3                     | 3     | 3     | 3      | 3        |
|               |               | Mean           | 8.47                  | 0.74  | 0.89  | 0.14   | 0.04     |
|               |               | Sdev           | 0.366                 | 0.012 | 0.088 | 0.007  | 0.011    |
| 50 mg/kg/day  |               |                |                       |       |       |        |          |
|               | 2514          | 2/1            | 9.45                  | 0.78  | 0.71  | 0.17   | 0.05     |
|               | 2521          | 2/1            | 7.58                  | 0.83  | 0.92  | 0.17   | 0.05     |
|               | 2529          | 2/1            | 7.59                  | 0.89  | 0.98  | 0.13   | 0.07     |
|               |               | N              | 3                     | 3     | 3     | 3      | 3        |
|               |               | Mean           | 8.21                  | 0.83  | 0.87  | 0.16   | 0.06     |
|               |               | Sdev           | 1.077                 | 0.051 | 0.139 | 0.021  | 0.009    |
| 200 mg/kg/day |               |                |                       |       |       |        |          |
|               | 2515          | 3/1            | 8.60                  | 0.80  | 0.84  | 0.14   | 0.04     |
|               | 2523          | 3/1            | 8.10                  | 0.78  | 0.96  | 0.07   | 0.03     |
|               | 2526          | 3/1            | 7.60                  | 0.76  | 0.90  | 0.20   | 0.06     |
|               |               | N              | 3                     | 3     | 3     | 3      | 3        |
|               |               | Mean           | 8.10                  | 0.78  | 0.90  | 0.14   | 0.04     |
|               |               | Sdev           | 0.504                 | 0.021 | 0.063 | 0.062  | 0.018    |
| 800 mg/kg/day |               |                |                       |       |       |        |          |
|               | 2517          | 4/1            | 6.87                  | 0.88  | 1.05  | 0.07   | 0.02     |
|               | 2519          | 4/1            | 7.71                  | 0.77  | 0.69  | 0.16   | 0.05     |
|               | 2525          | 4/1            | 9.33                  | 0.66  | 0.80  | 0.17   | 0.06     |
|               |               | N              | 3                     | 3     | 3     | 3      | 3        |
|               |               | Mean           | 7.97                  | 0.77  | 0.85  | 0.13   | 0.04     |
|               |               | Sdev           | 1.249                 | 0.112 | 0.183 | 0.054  | 0.020    |

Note: Data collected using grace days.

CONFIDENTIAL

Appendix 11  
Relative Organ Weights (% Body Weight)  
Test period  
Days 29 Interim Sacrifice

Fexinidazole

Study Number: 0505-2007

| Dose Level    | Animal Number | Group/Subgroup | Terminal Body Wt (kg) | SPLEEN | THYMUS | KIDNEYS | LIVER |
|---------------|---------------|----------------|-----------------------|--------|--------|---------|-------|
| F e m a l e s |               |                |                       |        |        |         |       |
| Vehicle       |               |                |                       |        |        |         |       |
|               | 2560          | 1/1            | 6.35                  | 0.24   | 0.036  | 0.50    | 4.12  |
|               | 2568          | 1/1            | 6.90                  | 0.30   | 0.024  | 0.48    | 3.43  |
|               | 2572          | 1/1            | 6.60                  | 0.22   | 0.012  | 0.47    | 3.74  |
|               |               | N              | 3                     | 3      | 3      | 3       | 3     |
|               |               | Mean           | 6.61                  | 0.25   | 0.024  | 0.48    | 3.77  |
|               |               | Sdev           | 0.276                 | 0.039  | 0.0120 | 0.020   | 0.347 |
| 50 mg/kg/day  |               |                |                       |        |        |         |       |
|               | 2562          | 2/1            | 6.57                  | 0.30   | 0.030  | 0.47    | 3.05  |
|               | 2563          | 2/1            | 7.61                  | 0.27   | 0.035  | 0.43    | 3.33  |
|               | 2576          | 2/1            | 8.38                  | 0.39   | 0.060  | 0.44    | 3.49  |
|               |               | N              | 3                     | 3      | 3      | 3       | 3     |
|               |               | Mean           | 7.52                  | 0.32   | 0.041  | 0.45    | 3.29  |
|               |               | Sdev           | 0.907                 | 0.065  | 0.0159 | 0.021   | 0.222 |
| 200 mg/kg/day |               |                |                       |        |        |         |       |
|               | 2561          | 3/1            | 7.10                  | 0.23   | 0.052  | 0.48    | 3.55  |
|               | 2570          | 3/1            | 6.65                  | 0.20   | 0.013  | 0.52    | 4.21  |
|               | 2567          | 3/1            | 8.00                  | 0.37   | 0.027  | 0.50    | 3.92  |
|               |               | N              | 3                     | 3      | 3      | 3       | 3     |
|               |               | Mean           | 7.25                  | 0.27   | 0.031  | 0.50    | 3.90  |
|               |               | Sdev           | 0.688                 | 0.092  | 0.0199 | 0.020   | 0.331 |
| 800 mg/kg/day |               |                |                       |        |        |         |       |
|               | 2564          | 4/1            | 6.10                  | 0.26   | 0.015  | 0.44    | 3.55  |
|               | 2565          | 4/1            | 6.11                  | 0.22   | 0.025  | 0.49    | 4.22  |
|               | 2569          | 4/1            | 7.65                  | 0.27   | 0.020  | 0.43    | 3.59  |
|               |               | N              | 3                     | 3      | 3      | 3       | 3     |
|               |               | Mean           | 6.62                  | 0.25   | 0.020  | 0.45    | 3.79  |
|               |               | Sdev           | 0.889                 | 0.028  | 0.0046 | 0.034   | 0.374 |

Note: Data collected using grace days.



CONFIDENTIAL

Appendix 11  
Relative Organ Weights (% Body Weight)  
Test period  
Days 29 Interim Sacrifice

Fexinidazole

Study Number: 0505-2007

| Dose Level    | Animal Number | Group/Subgroup | Terminal Body Wt (kg) | ADRENALS | HEART | BRAIN | OVARIES |
|---------------|---------------|----------------|-----------------------|----------|-------|-------|---------|
| F e m a l e s |               |                |                       |          |       |       |         |
| Vehicle       |               |                |                       |          |       |       |         |
|               | 2560          | 1/1            | 6.35                  | 0.021    | 0.92  | 1.13  | 0.014   |
|               | 2568          | 1/1            | 6.90                  | 0.020    | 0.81  | 1.07  | 0.012   |
|               | 2572          | 1/1            | 6.60                  | 0.017    | 0.84  | 1.16  | 0.009   |
|               |               | N              | 3                     | 3        | 3     | 3     | 3       |
|               |               | Mean           | 6.61                  | 0.019    | 0.86  | 1.12  | 0.012   |
|               |               | Sdev           | 0.276                 | 0.0021   | 0.059 | 0.042 | 0.0028  |
| 50 mg/kg/day  |               |                |                       |          |       |       |         |
|               | 2562          | 2/1            | 6.57                  | 0.018    | 0.87  | 1.09  | 0.026   |
|               | 2563          | 2/1            | 7.61                  | 0.014    | 0.81  | 0.84  | 0.024   |
|               | 2576          | 2/1            | 8.38                  | 0.014    | 0.71  | 0.85  | 0.026   |
|               |               | N              | 3                     | 3        | 3     | 3     | 3       |
|               |               | Mean           | 7.52                  | 0.015    | 0.80  | 0.93  | 0.025   |
|               |               | Sdev           | 0.907                 | 0.0027   | 0.078 | 0.144 | 0.0015  |
| 200 mg/kg/day |               |                |                       |          |       |       |         |
|               | 2561          | 3/1            | 7.10                  | 0.021    | 0.76  | 1.09  | 0.021   |
|               | 2570          | 3/1            | 6.65                  | 0.020    | 0.82  | 1.12  | 0.021   |
|               | 2567          | 3/1            | 8.00                  | 0.013    | 0.90  | 0.93  | 0.027   |
|               |               | N              | 3                     | 3        | 3     | 3     | 3       |
|               |               | Mean           | 7.25                  | 0.018    | 0.83  | 1.04  | 0.023   |
|               |               | Sdev           | 0.688                 | 0.0043   | 0.070 | 0.100 | 0.0035  |
| 800 mg/kg/day |               |                |                       |          |       |       |         |
|               | 2564          | 4/1            | 6.10                  | 0.019    | 0.83  | 1.04  | 0.018   |
|               | 2565          | 4/1            | 6.11                  | 0.021    | 0.77  | 1.00  | 0.022   |
|               | 2569          | 4/1            | 7.65                  | 0.015    | 0.83  | 1.00  | 0.032   |
|               |               | N              | 3                     | 3        | 3     | 3     | 3       |
|               |               | Mean           | 6.62                  | 0.019    | 0.81  | 1.01  | 0.024   |
|               |               | Sdev           | 0.889                 | 0.0032   | 0.038 | 0.024 | 0.0072  |

Note: Data collected using grace days.

CONFIDENTIAL

Appendix 11  
Relative Organ Weights (% Body Weight)  
Test period  
Days 43 Final Sacrifice

Fexinidazole

Study Number: 0505-2007

| Dose Level    | Animal Number | Group/ Subgroup | Terminal Body Wt (kg) | SPLEEN | THYMUS | KIDNEYS | LIVER | ADRENALS |
|---------------|---------------|-----------------|-----------------------|--------|--------|---------|-------|----------|
| M a l e s     |               |                 |                       |        |        |         |       |          |
| Vehicle       | 2527          | 1/1             | 7.87                  | 0.25   | 0.046  | 0.42    | 3.23  | 0.014    |
|               | 2533          | 1/1             | 7.38                  | 0.24   | 0.021  | 0.42    | 3.24  | 0.016    |
|               |               | N               | 2                     | 2      | 2      | 2       | 2     | 2        |
|               |               | Mean            | 7.62                  | 0.25   | 0.033  | 0.42    | 3.24  | 0.015    |
|               |               | Sdev            | 0.351                 | 0.009  | 0.0179 | 0.000   | 0.008 | 0.0012   |
| 800 mg/kg/day | 2528          | 4/1             | 8.53                  | 0.24   | 0.019  | 0.54    | 3.30  | 0.012    |
|               | 2530          | 4/1             | 6.66                  | 0.21   | 0.017  | 0.51    | 3.14  | 0.018    |
|               |               | N               | 2                     | 2      | 2      | 2       | 2     | 2        |
|               |               | Mean            | 7.60                  | 0.23   | 0.018  | 0.52    | 3.22  | 0.015    |
|               |               | Sdev            | 1.323                 | 0.017  | 0.0009 | 0.018   | 0.114 | 0.0037   |

Note: Data collected using grace days.

CONFIDENTIAL

Appendix 11  
 Relative Organ Weights (% Body Weight)  
 Test period  
 Days 43 Final Sacrifice

Fexinidazole

Study Number: 0505-2007

| Dose Level    | Animal Number | Group/ Subgroup | Terminal Body Wt (kg) | HEART | BRAIN | TESTES | PROSTATE |
|---------------|---------------|-----------------|-----------------------|-------|-------|--------|----------|
| M a l e s     |               |                 |                       |       |       |        |          |
| Vehicle       |               |                 |                       |       |       |        |          |
|               | 2527          | 1/1             | 7.87                  | 0.91  | 0.83  | 0.16   | 0.05     |
|               | 2533          | 1/1             | 7.38                  | 0.92  | 1.00  | 0.20   | 0.02     |
|               |               | N               | 2                     | 2     | 2     | 2      | 2        |
|               |               | Mean            | 7.62                  | 0.92  | 0.92  | 0.18   | 0.03     |
|               |               | Sdev            | 0.351                 | 0.008 | 0.123 | 0.025  | 0.022    |
| 800 mg/kg/day |               |                 |                       |       |       |        |          |
|               | 2528          | 4/1             | 8.53                  | 0.84  | 0.88  | 0.12   | 0.04     |
|               | 2530          | 4/1             | 6.66                  | 0.94  | 0.95  | 0.15   | 0.01     |
|               |               | N               | 2                     | 2     | 2     | 2      | 2        |
|               |               | Mean            | 7.60                  | 0.89  | 0.92  | 0.14   | 0.03     |
|               |               | Sdev            | 1.323                 | 0.074 | 0.049 | 0.021  | 0.019    |

Note: Data collected using grace days.

CONFIDENTIAL

Appendix 11  
 Relative Organ Weights (% Body Weight)  
 Test period  
 Days 43 Final Sacrifice

Fexinidazole

Study Number: 0505-2007

| Dose Level    | Animal Number | Group/ Subgroup | Terminal Body Wt (kg) | SPLEEN | THYMUS | KIDNEYS | LIVER |
|---------------|---------------|-----------------|-----------------------|--------|--------|---------|-------|
| F e m a l e s |               |                 |                       |        |        |         |       |
| Vehicle       | 2575          | 1/1             | 8.11                  | 0.27   | 0.041  | 0.44    | 3.27  |
|               | 2577          | 1/1             | 8.55                  | 0.34   | 0.032  | 0.41    | 3.23  |
|               |               | N               | 2                     | 2      | 2      | 2       | 2     |
|               |               | Mean            | 8.33                  | 0.30   | 0.037  | 0.42    | 3.25  |
|               |               | Sdev            | 0.310                 | 0.047  | 0.0065 | 0.019   | 0.026 |
| 800 mg/kg/day | 2571          | 4/1             | 7.32                  | 0.28   | 0.035  | 0.44    | 3.71  |
|               | 2573          | 4/1             | 6.83                  | 0.30   | 0.022  | 0.46    | 3.75  |
|               |               | N               | 2                     | 2      | 2      | 2       | 2     |
|               |               | Mean            | 7.07                  | 0.29   | 0.029  | 0.45    | 3.73  |
|               |               | Sdev            | 0.348                 | 0.016  | 0.0093 | 0.019   | 0.028 |

Note: Data collected using grace days.

CONFIDENTIAL

Appendix 11  
Relative Organ Weights (% Body Weight)  
Test period  
Days 43 Final Sacrifice

Fexinidazole

Study Number: 0505-2007

| Dose Level    | Animal Number | Group/ Subgroup | Terminal Body Wt (kg) | ADRENALS | HEART | BRAIN | OVARIES |
|---------------|---------------|-----------------|-----------------------|----------|-------|-------|---------|
| F e m a l e s |               |                 |                       |          |       |       |         |
| Vehicle       |               |                 |                       |          |       |       |         |
|               | 2575          | 1/1             | 8.11                  | 0.011    | 0.83  | 0.88  | 0.028   |
|               | 2577          | 1/1             | 8.55                  | 0.014    | 0.71  | 0.76  | 0.020   |
|               |               | N               | 2                     | 2        | 2     | 2     | 2       |
|               |               | Mean            | 8.33                  | 0.012    | 0.77  | 0.82  | 0.024   |
|               |               | Sdev            | 0.310                 | 0.0023   | 0.087 | 0.088 | 0.0059  |
| 800 mg/kg/day |               |                 |                       |          |       |       |         |
|               | 2571          | 4/1             | 7.32                  | 0.016    | 0.78  | 0.94  | 0.022   |
|               | 2573          | 4/1             | 6.83                  | 0.017    | 0.69  | 1.00  | 0.023   |
|               |               | N               | 2                     | 2        | 2     | 2     | 2       |
|               |               | Mean            | 7.07                  | 0.016    | 0.73  | 0.97  | 0.022   |
|               |               | Sdev            | 0.348                 | 0.0004   | 0.068 | 0.042 | 0.0003  |

Note: Data collected using grace days.

## ***Appendix 12 Gross And Microscopic Pathology***

CONFIDENTIAL

Appendix 12  
Individual Animal Microscopic vs. Gross Observations

Fexinidazole

Study Number: 0505-2007

ANIMAL: 2516                      SEX: Male                      GROUP: 1                      DOSE LEVEL: Vehicle  
DAY OF DEATH: 29 Test period                      STATUS: Scheduled phase sacrifice # 1                      TERMINAL BODY WEIGHT (kg) : 8.41

| Tissue                     | Gross observations/comments     | Correlated Microscopic Observations                                                                     |
|----------------------------|---------------------------------|---------------------------------------------------------------------------------------------------------|
| COLON . . . . .            | No gross observations on tissue | CRYPT DILATATION WITH/WITHOUT LUMENAL<br>NECROTIC DEBRIS, Minimal, Focal.                               |
| DUODENUM . . . . .         | No gross observations on tissue | CRYPT DILATATION WITH/WITHOUT LUMENAL<br>NECROTIC DEBRIS, Slight, Multifocal.                           |
| GALL BLADDER . . . . .     | No gross observations on tissue | LYMPHOCYTIC INFILTRATION, Minimal,<br>Multifocal.                                                       |
| GENER. CONDITION . . . . . | GOOD                            | No micropathology observations on tissue.                                                               |
| HEART . . . . .            | No gross observations on tissue | MESOTHELIAL HYPERPLASIA, ATRIAL, Minimal,<br>Focal, Unilateral left..                                   |
| KIDNEYS . . . . .          | No gross observations on tissue | PAPILLARY MINERALIZATION, Minimal,<br>Multifocal.                                                       |
| LIVER . . . . .            | No gross observations on tissue | CHRONIC INFLAMMATION, Minimal, Multifocal.<br><br>EXTRAMEDULLARY HEMATOPOIESIS, Minimal,<br>Multifocal. |
| MESENTERIC L.N. . . . .    | No gross observations on tissue | SINUS ERYTHROCYTES/ERYTHROPHAGOCYTOSIS,<br>Minimal.                                                     |
| MAMMARY GLAND . . . . .    | No gross observations on tissue | NO MAMMARY TISSUE IN THE SECTION, Present.                                                              |

CONFIDENTIAL

Appendix 12  
Individual Animal Microscopic vs. Gross Observations

Fexinidazole

Study Number: 0505-2007

ANIMAL: 2516                      SEX: Male                      GROUP: 1                      DOSE LEVEL: Vehicle  
DAY OF DEATH: 29 Test period                      STATUS: Scheduled phase sacrifice # 1                      TERMINAL BODY WEIGHT (kg) : 8.41

| Tissue                 | Gross observations/comments     | Correlated Microscopic Observations                      |
|------------------------|---------------------------------|----------------------------------------------------------|
| PITUITARY . . . . .    | No gross observations on tissue | CYSTS, PARS DISTALIS, Slight, Focal.                     |
| PARATHYROIDS . . . . . | No gross observations on tissue | ONLY ONE PARATHYROID AVAILABLE FOR EXAMINATION, Present. |
| PAROTIDS . . . . .     | No gross observations on tissue | ACINAR ATROPHY, Minimal, Focal, Unilateral..             |
| TESTES . . . . .       | No gross observations on tissue | SEGMENTAL HYPOPLASIA, Slight, Multifocal, Unilateral..   |

The following tissues have no gross observations and were not examined microscopically:  
No tissue to list.

The following tissues have no gross observations and were marked as unremarkable microscopically:

|                  |                 |                 |                 |            |
|------------------|-----------------|-----------------|-----------------|------------|
| ADRENALS         | AORTA-THORACIC  | BONE MARROW     | BRAIN           | CECUM      |
| DIAPHRAGM        | EPIDIDYMIDES    | ESOPHAGUS       | EYES            | FEMUR HEAD |
| ILEUM            | JEJUNUM         | LACRIMAL GLANDS | MANDIBULAR L.N. | LUNG       |
| SKELETAL MUSCLE  | SCIATIC NERVE   | OPTIC NERVES    | PANCREAS        | PROSTATE   |
| SPINAL CORD-CERV | MANDIBULAR S.G. | SKIN            | SPLEEN          | STOMACH    |
| STERNUM          | THYROIDS        | THYMUS          | TONGUE          | TRACHEA    |
| URINARY BLADDER  |                 |                 |                 |            |



CONFIDENTIAL

Appendix 12  
Individual Animal Microscopic vs. Gross Observations

Fexinidazole

Study Number: 0505-2007

---

|                              |                                       |                             |                     |
|------------------------------|---------------------------------------|-----------------------------|---------------------|
| ANIMAL: 2518                 | SEX: Male                             | GROUP: 1                    | DOSE LEVEL: Vehicle |
| DAY OF DEATH: 29 Test period | STATUS: Scheduled phase sacrifice # 1 | TERMINAL BODY WEIGHT (kg) : | 8.86                |

---

| Tissue                  | Gross observations/comments     | Correlated Microscopic Observations                                                                        |
|-------------------------|---------------------------------|------------------------------------------------------------------------------------------------------------|
| COLON . . . . .         | No gross observations on tissue | CRYPT DILATATION WITH/WITHOUT LUMENAL<br>NECROTIC DEBRIS, Minimal, Focal.                                  |
| GENER. CONDITION . . .  | GOOD                            | No micropathology observations on tissue.                                                                  |
| HEART . . . . .         | No gross observations on tissue | MESOTHELIAL HYPERPLASIA, ATRIAL, Slight,<br>Focal, Unilateral left..                                       |
| KIDNEYS . . . . .       | No gross observations on tissue | PAPILLARY MINERALIZATION, Minimal,<br>Multifocal.                                                          |
| LACRIMAL GLANDS . . . . | No gross observations on tissue | ONLY ONE GLAND AVAILABLE FOR EXAMINATION,<br>Present.                                                      |
| LUNG . . . . .          | No gross observations on tissue | CHRONIC INFLAMMATION, Slight, Multifocal.<br><br>ALVEOLAR MACROPHAGE INFILTRATION, Minimal,<br>Multifocal. |
| MAMMARY GLAND . . . . . | No gross observations on tissue | NO MAMMARY TISSUE IN THE SECTION, Present.                                                                 |
| PARATHYROIDS . . . . .  | No gross observations on tissue | ONLY ONE PARATHYROID AVAILABLE FOR<br>EXAMINATION, Present.                                                |
| THYMUS . . . . .        | No gross observations on tissue | CYSTS, Minimal, Focal.<br><br>INVOLUTION, Slight.                                                          |

CONFIDENTIAL

Appendix 12  
Individual Animal Microscopic vs. Gross Observations

Fexinidazole

Study Number: 0505-2007

---

|                              |                                       |                             |                     |
|------------------------------|---------------------------------------|-----------------------------|---------------------|
| ANIMAL: 2518                 | SEX: Male                             | GROUP: 1                    | DOSE LEVEL: Vehicle |
| DAY OF DEATH: 29 Test period | STATUS: Scheduled phase sacrifice # 1 | TERMINAL BODY WEIGHT (kg) : | 8.86                |

---

| Tissue                  | Gross observations/comments     | Correlated Microscopic Observations                                                                                   |
|-------------------------|---------------------------------|-----------------------------------------------------------------------------------------------------------------------|
| URINARY BLADDER . . . . | No gross observations on tissue | MINERALIZATION IN MUSCULARIS/SUBSEROSA,<br>Slight, Focal. / associated with small<br>vessels and smooth muscle tissue |

The following tissues have no gross observations and were not examined microscopically:  
No tissue to list.

The following tissues have no gross observations and were marked as unremarkable microscopically:

|                 |                 |                 |                  |                 |
|-----------------|-----------------|-----------------|------------------|-----------------|
| ADRENALS        | AORTA-THORACIC  | BONE MARROW     | BRAIN            | CECUM           |
| DIAPHRAGM       | DUODENUM        | EPIDIDYMIDES    | ESOPHAGUS        | EYES            |
| FEMUR HEAD      | GALL BLADDER    | ILEUM           | JEJUNUM          | LIVER           |
| MANDIBULAR L.N. | MESENTERIC L.N. | SKELETAL MUSCLE | SCIATIC NERVE    | OPTIC NERVES    |
| PANCREAS        | PITUITARY       | PROSTATE        | SPINAL CORD-CERV | MANDIBULAR S.G. |
| PAROTIDS        | SKIN            | SPLEEN          | STOMACH          | STERNUM         |
| TESTES          | THYROIDS        | TONGUE          | TRACHEA          |                 |

CONFIDENTIAL

Appendix 12  
Individual Animal Microscopic vs. Gross Observations

Fexinidazole

Study Number: 0505-2007

ANIMAL: 2520                      SEX: Male                      GROUP: 1                      DOSE LEVEL: Vehicle  
DAY OF DEATH: 30 Test period                      STATUS: Scheduled phase sacrifice # 1                      TERMINAL BODY WEIGHT (kg) : 8.14

| Tissue                     | Gross observations/comments     | Correlated Microscopic Observations                                       |
|----------------------------|---------------------------------|---------------------------------------------------------------------------|
| GALL BLADDER . . . . .     | No gross observations on tissue | LYMPHOCYTIC INFILTRATION, Minimal, Multifocal.                            |
| GENER. CONDITION . . . . . | GOOD                            | No micropathology observations on tissue.                                 |
| KIDNEYS . . . . .          | No gross observations on tissue | PAPILLARY MINERALIZATION, Minimal, Multifocal.                            |
| LIVER . . . . .            | No gross observations on tissue | CHRONIC INFLAMMATION, Minimal, Multifocal.                                |
| MESENTERIC L.N. . . . .    | No gross observations on tissue | SINUS ERYTHROCYTES/ERYTHROPHAGOCYTOSIS, Slight.                           |
| LUNG . . . . .             | No gross observations on tissue | ALVEOLAR MACROPHAGE INFILTRATION, Minimal, Multifocal.                    |
| MAMMARY GLAND . . . . .    | No gross observations on tissue | NO MAMMARY TISSUE IN THE SECTION, Present.                                |
| PITUITARY . . . . .        | No gross observations on tissue | CYSTS, PARS DISTALIS, Slight, Multifocal.                                 |
| SKIN . . . . .             | No gross observations on tissue | CHRONIC INFLAMMATION, Minimal, Multifocal. / in the dermis perifollicular |
| THYMUS . . . . .           | No gross observations on tissue | INVOLUTION, Slight.                                                       |

CONFIDENTIAL

Appendix 12  
Individual Animal Microscopic vs. Gross Observations

Fexinidazole

Study Number: 0505-2007

---

|                              |                                       |                             |                     |
|------------------------------|---------------------------------------|-----------------------------|---------------------|
| ANIMAL: 2520                 | SEX: Male                             | GROUP: 1                    | DOSE LEVEL: Vehicle |
| DAY OF DEATH: 30 Test period | STATUS: Scheduled phase sacrifice # 1 | TERMINAL BODY WEIGHT (kg) : | 8.14                |

---

| Tissue | Gross observations/comments | Correlated Microscopic Observations |
|--------|-----------------------------|-------------------------------------|
|--------|-----------------------------|-------------------------------------|

---

The following tissues have no gross observations and were not examined microscopically:  
No tissue to list.

The following tissues have no gross observations and were marked as unremarkable microscopically:

|                 |                 |                 |                  |                 |
|-----------------|-----------------|-----------------|------------------|-----------------|
| ADRENALS        | AORTA-THORACIC  | BONE MARROW     | BRAIN            | CECUM           |
| COLON           | DIAPHRAGM       | DUODENUM        | EPIDIDYMIDES     | ESOPHAGUS       |
| EYES            | FEMUR HEAD      | HEART           | ILEUM            | JEJUNUM         |
| LACRIMAL GLANDS | MANDIBULAR L.N. | SKELETAL MUSCLE | SCIATIC NERVE    | OPTIC NERVES    |
| PANCREAS        | PROSTATE        | PARATHYROIDS    | SPINAL CORD-CERV | MANDIBULAR S.G. |
| PAROTIDS        | SPLEEN          | STOMACH         | STERNUM          | TESTES          |
| THYROIDS        | TONGUE          | TRACHEA         | URINARY BLADDER  |                 |

CONFIDENTIAL

Appendix 12  
Individual Animal Microscopic vs. Gross Observations

Fexinidazole

Study Number: 0505-2007

ANIMAL: 2527                      SEX: Male                      GROUP: 1                      DOSE LEVEL: Vehicle  
DAY OF DEATH: 43 Test period                      STATUS: Final phase sacrifice                      TERMINAL BODY WEIGHT (kg) : 7.87

| Tissue                     | Gross observations/comments     | Correlated Microscopic Observations                                                                                                                                                                                                   |
|----------------------------|---------------------------------|---------------------------------------------------------------------------------------------------------------------------------------------------------------------------------------------------------------------------------------|
| DUODENUM . . . . .         | No gross observations on tissue | CRYPT DILATATION WITH/WITHOUT LUMENAL<br>NECROTIC DEBRIS, Minimal, Focal.                                                                                                                                                             |
| GALL BLADDER . . . . .     | No gross observations on tissue | LYMPHOCYTIC INFILTRATION, Minimal,<br>Multifocal.                                                                                                                                                                                     |
| GENER. CONDITION . . . . . | GOOD                            | No micropathology observations on tissue.                                                                                                                                                                                             |
| HEART . . . . .            | No gross observations on tissue | MESOTHELIAL HYPERPLASIA, ATRIAL, Minimal,<br>Multifocal, Unilateral left..                                                                                                                                                            |
| KIDNEYS . . . . .          | No gross observations on tissue | CHRONIC INFLAMMATION, Slight, Multifocal.<br><br>PAPILLARY MINERALIZATION, Minimal,<br>Multifocal.<br><br>CORTICAL TUBULAR DILATION, Moderate,<br>Multifocal.<br><br>CORTICAL TUBULAR REGENERATIVE BASOPHILIA,<br>Slight, Multifocal. |
| LIVER . . . . .            | No gross observations on tissue | EXTRAMEDULLARY HEMATOPOIESIS, Minimal,<br>Multifocal.                                                                                                                                                                                 |
| MESENTERIC L.N. . . . .    | No gross observations on tissue | SINUS ERYTHROCYTES/ERYTHROPHAGOCYTOSIS,<br>Slight.                                                                                                                                                                                    |

CONFIDENTIAL

Appendix 12  
Individual Animal Microscopic vs. Gross Observations

Fexinidazole

Study Number: 0505-2007

ANIMAL: 2527                      SEX: Male                      GROUP: 1                      DOSE LEVEL: Vehicle  
DAY OF DEATH: 43 Test period                      STATUS: Final phase sacrifice                      TERMINAL BODY WEIGHT (kg) : 7.87

| Tissue                  | Gross observations/comments     | Correlated Microscopic Observations                      |
|-------------------------|---------------------------------|----------------------------------------------------------|
| LUNG . . . . .          | No gross observations on tissue | ALVEOLAR MACROPHAGE INFILTRATION, Minimal, Multifocal.   |
| MAMMARY GLAND . . . . . | No gross observations on tissue | NO MAMMARY TISSUE IN THE SECTION, Present.               |
| PARATHYROIDS . . . . .  | No gross observations on tissue | ONLY ONE PARATHYROID AVAILABLE FOR EXAMINATION, Present. |
| MANDIBULAR S.G. . . . . | No gross observations on tissue | LYMPHOCYTIC INFILTRATION, Minimal, Focal, Unilateral..   |
| PAROTIDS . . . . .      | No gross observations on tissue | ACINAR ATROPHY, Minimal, Focal.                          |
| THYROIDS . . . . .      | No gross observations on tissue | CYSTIC FOLLICLES, Slight, Focal, Unilateral..            |
| THYMUS . . . . .        | No gross observations on tissue | CYSTS, Minimal, Focal.<br><br>INVOLUTION, Slight.        |

The following tissues have no gross observations and were not examined microscopically:  
No tissue to list.

The following tissues have no gross observations and were marked as unremarkable microscopically:  
ADRENALS                      AORTA-THORACIC                      BONE MARROW                      BRAIN                      CECUM

CONFIDENTIAL

Appendix 12  
Individual Animal Microscopic vs. Gross Observations

Fexinidazole

Study Number: 0505-2007

---

|                              |                               |                             |                     |
|------------------------------|-------------------------------|-----------------------------|---------------------|
| ANIMAL: 2527                 | SEX: Male                     | GROUP: 1                    | DOSE LEVEL: Vehicle |
| DAY OF DEATH: 43 Test period | STATUS: Final phase sacrifice | TERMINAL BODY WEIGHT (kg) : | 7.87                |

---

| Tissue | Gross observations/comments | Correlated Microscopic Observations |
|--------|-----------------------------|-------------------------------------|
|--------|-----------------------------|-------------------------------------|

---

The following tissues have no gross observations and were marked as unremarkable microscopically:

|                 |                  |              |                 |                 |
|-----------------|------------------|--------------|-----------------|-----------------|
| COLON           | DIAPHRAGM        | EPIDIDYMIDES | ESOPHAGUS       | EYES            |
| FEMUR HEAD      | ILEUM            | JEJUNUM      | LACRIMAL GLANDS | MANDIBULAR L.N. |
| SKELETAL MUSCLE | SCIATIC NERVE    | OPTIC NERVES | PANCREAS        | PITUITARY       |
| PROSTATE        | SPINAL CORD-CERV | SKIN         | SPLEEN          | STOMACH         |
| STERNUM         | TESTES           | TONGUE       | TRACHEA         | URINARY BLADDER |

CONFIDENTIAL

Appendix 12  
Individual Animal Microscopic vs. Gross Observations

Fexinidazole

Study Number: 0505-2007

|                              |                               |                             |                     |
|------------------------------|-------------------------------|-----------------------------|---------------------|
| ANIMAL: 2533                 | SEX: Male                     | GROUP: 1                    | DOSE LEVEL: Vehicle |
| DAY OF DEATH: 43 Test period | STATUS: Final phase sacrifice | TERMINAL BODY WEIGHT (kg) : | 7.38                |

| Tissue                     | Gross observations/comments     | Correlated Microscopic Observations                                                                                               |
|----------------------------|---------------------------------|-----------------------------------------------------------------------------------------------------------------------------------|
| GALL BLADDER . . . . .     | No gross observations on tissue | LYMPHOCYTIC INFILTRATION, Minimal, Multifocal.                                                                                    |
| GENER. CONDITION . . . . . | GOOD                            | No micropathology observations on tissue.                                                                                         |
| KIDNEYS . . . . .          | No gross observations on tissue | PAPILLARY MINERALIZATION, Minimal, Multifocal.<br><br>CORTICAL TUBULAR REGENERATIVE BASOPHILIA, Minimal, Focal, Unilateral left.. |
| LIVER . . . . .            | No gross observations on tissue | EXTRAMEDULLARY HEMATOPOIESIS, Minimal, Multifocal.                                                                                |
| MANDIBULAR L.N. . . . .    | No gross observations on tissue | SINUS ERYTHROCYTES/ERYTHROPHAGOCYTOSIS, Minimal.                                                                                  |
| MESENTERIC L.N. . . . .    | No gross observations on tissue | SINUS ERYTHROCYTES/ERYTHROPHAGOCYTOSIS, Minimal.                                                                                  |
| LUNG . . . . .             | No gross observations on tissue | ALVEOLAR HEMORRHAGE, Slight, Multifocal.<br><br>CAPILLARY ANGIOMATOSIS, Slight, Multifocal.                                       |
| MAMMARY GLAND . . . . .    | No gross observations on tissue | NO MAMMARY TISSUE IN THE SECTION, Present.                                                                                        |
| PROSTATE . . . . .         | SMALL                           | Examined 1 correlation found:<br>IMMATURE, Present.                                                                               |



CONFIDENTIAL

Appendix 12  
Individual Animal Microscopic vs. Gross Observations

Fexinidazole

Study Number: 0505-2007

---

|                              |                               |                             |                     |
|------------------------------|-------------------------------|-----------------------------|---------------------|
| ANIMAL: 2533                 | SEX: Male                     | GROUP: 1                    | DOSE LEVEL: Vehicle |
| DAY OF DEATH: 43 Test period | STATUS: Final phase sacrifice | TERMINAL BODY WEIGHT (kg) : | 7.38                |

---

| Tissue | Gross observations/comments | Correlated Microscopic Observations |
|--------|-----------------------------|-------------------------------------|
|--------|-----------------------------|-------------------------------------|

---

|                    |                                 |                                                 |
|--------------------|---------------------------------|-------------------------------------------------|
| PAROTIDS . . . . . | No gross observations on tissue | ACINAR ATROPHY, Minimal, Focal,<br>Unilateral.. |
|--------------------|---------------------------------|-------------------------------------------------|

|                  |                                 |                       |
|------------------|---------------------------------|-----------------------|
| THYMUS . . . . . | No gross observations on tissue | INVOLUTION, Moderate. |
|------------------|---------------------------------|-----------------------|

The following tissues have no gross observations and were not examined microscopically:  
No tissue to list.

The following tissues have no gross observations and were marked as unremarkable microscopically:

|                 |                 |                  |                 |           |
|-----------------|-----------------|------------------|-----------------|-----------|
| ADRENALS        | AORTA-THORACIC  | BONE MARROW      | BRAIN           | CECUM     |
| COLON           | DIAPHRAGM       | DUODENUM         | EPIDIDYMIDES    | ESOPHAGUS |
| EYES            | FEMUR HEAD      | HEART            | ILEUM           | JEJUNUM   |
| LACRIMAL GLANDS | SKELETAL MUSCLE | SCIATIC NERVE    | OPTIC NERVES    | PANCREAS  |
| PITUITARY       | PARATHYROIDS    | SPINAL CORD-CERV | MANDIBULAR S.G. | SKIN      |
| SPLEEN          | STOMACH         | STERNUM          | TESTES          | THYROIDS  |
| TONGUE          | TRACHEA         | URINARY BLADDER  |                 |           |

CONFIDENTIAL

Appendix 12  
Individual Animal Microscopic vs. Gross Observations

Fexinidazole

Study Number: 0505-2007

---

|                              |                                       |                             |                          |
|------------------------------|---------------------------------------|-----------------------------|--------------------------|
| ANIMAL: 2514                 | SEX: Male                             | GROUP: 2                    | DOSE LEVEL: 50 mg/kg/day |
| DAY OF DEATH: 29 Test period | STATUS: Scheduled phase sacrifice # 1 | TERMINAL BODY WEIGHT (kg) : | 9.45                     |

---

| Tissue                      | Gross observations/comments | Correlated Microscopic Observations       |
|-----------------------------|-----------------------------|-------------------------------------------|
| GENER. CONDITION . . . GOOD |                             | No micropathology observations on tissue. |

The following tissues have no gross observations and were not examined microscopically:

|                 |                 |                 |                 |                  |
|-----------------|-----------------|-----------------|-----------------|------------------|
| ADRENALS        | AORTA-THORACIC  | BRAIN           | CECUM           | COLON            |
| DIAPHRAGM       | DUODENUM        | EPIDIDYMIDES    | ESOPHAGUS       | EYES             |
| FEMUR HEAD      | GALL BLADDER    | HEART           | ILEUM           | JEJUNUM          |
| KIDNEYS         | LACRIMAL GLANDS | LIVER           | MANDIBULAR L.N. | MESENTERIC L.N.  |
| LUNG            | MAMMARY GLAND   | SKELETAL MUSCLE | SCIATIC NERVE   | OPTIC NERVES     |
| PANCREAS        | PITUITARY       | PROSTATE        | PARATHYROIDS    | SPINAL CORD-CERV |
| MANDIBULAR S.G. | PAROTIDS        | SKIN            | SPLEEN          | STOMACH          |
| STERNUM         | TESTES          | THYROIDS        | THYMUS          | TONGUE           |
| TRACHEA         | URINARY BLADDER |                 |                 |                  |

The following tissues have no gross observations and were marked as unremarkable microscopically:  
BONE MARROW



CONFIDENTIAL

Appendix 12  
Individual Animal Microscopic vs. Gross Observations

Fexinidazole

Study Number: 0505-2007

---

|                              |                                       |                             |                          |
|------------------------------|---------------------------------------|-----------------------------|--------------------------|
| ANIMAL: 2529                 | SEX: Male                             | GROUP: 2                    | DOSE LEVEL: 50 mg/kg/day |
| DAY OF DEATH: 30 Test period | STATUS: Scheduled phase sacrifice # 1 | TERMINAL BODY WEIGHT (kg) : | 7.59                     |

---

| Tissue                      | Gross observations/comments | Correlated Microscopic Observations       |
|-----------------------------|-----------------------------|-------------------------------------------|
| GENER. CONDITION . . . GOOD |                             | No micropathology observations on tissue. |

The following tissues have no gross observations and were not examined microscopically:

|                 |                 |                 |                 |                  |
|-----------------|-----------------|-----------------|-----------------|------------------|
| ADRENALS        | AORTA-THORACIC  | BRAIN           | CECUM           | COLON            |
| DIAPHRAGM       | DUODENUM        | EPIDIDYMIDES    | ESOPHAGUS       | EYES             |
| FEMUR HEAD      | GALL BLADDER    | HEART           | ILEUM           | JEJUNUM          |
| KIDNEYS         | LACRIMAL GLANDS | LIVER           | MANDIBULAR L.N. | MESENTERIC L.N.  |
| LUNG            | MAMMARY GLAND   | SKELETAL MUSCLE | SCIATIC NERVE   | OPTIC NERVES     |
| PANCREAS        | PITUITARY       | PROSTATE        | PARATHYROIDS    | SPINAL CORD-CERV |
| MANDIBULAR S.G. | PAROTIDS        | SKIN            | SPLEEN          | STOMACH          |
| STERNUM         | TESTES          | THYROIDS        | THYMUS          | TONGUE           |
| TRACHEA         | URINARY BLADDER |                 |                 |                  |

The following tissues have no gross observations and were marked as unremarkable microscopically:  
BONE MARROW

CONFIDENTIAL

Appendix 12  
Individual Animal Microscopic vs. Gross Observations

Fexinidazole

Study Number: 0505-2007

---

|                              |                                       |                             |                           |
|------------------------------|---------------------------------------|-----------------------------|---------------------------|
| ANIMAL: 2515                 | SEX: Male                             | GROUP: 3                    | DOSE LEVEL: 200 mg/kg/day |
| DAY OF DEATH: 29 Test period | STATUS: Scheduled phase sacrifice # 1 | TERMINAL BODY WEIGHT (kg) : | 8.60                      |

---

| Tissue                 | Gross observations/comments | Correlated Microscopic Observations       |
|------------------------|-----------------------------|-------------------------------------------|
| GENER. CONDITION . . . | GOOD                        | No micropathology observations on tissue. |

---

The following tissues have no gross observations and were not examined microscopically:

|                 |                 |                 |                 |                  |
|-----------------|-----------------|-----------------|-----------------|------------------|
| ADRENALS        | AORTA-THORACIC  | BRAIN           | CECUM           | COLON            |
| DIAPHRAGM       | DUODENUM        | EPIDIDYMIDES    | ESOPHAGUS       | EYES             |
| FEMUR HEAD      | GALL BLADDER    | HEART           | ILEUM           | JEJUNUM          |
| KIDNEYS         | LACRIMAL GLANDS | LIVER           | MANDIBULAR L.N. | MESENTERIC L.N.  |
| LUNG            | MAMMARY GLAND   | SKELETAL MUSCLE | SCIATIC NERVE   | OPTIC NERVES     |
| PANCREAS        | PITUITARY       | PROSTATE        | PARATHYROIDS    | SPINAL CORD-CERV |
| MANDIBULAR S.G. | PAROTIDS        | SKIN            | SPLEEN          | STOMACH          |
| STERNUM         | TESTES          | THYROIDS        | THYMUS          | TONGUE           |
| TRACHEA         | URINARY BLADDER |                 |                 |                  |

The following tissues have no gross observations and were marked as unremarkable microscopically:  
BONE MARROW

CONFIDENTIAL

Appendix 12  
Individual Animal Microscopic vs. Gross Observations

Fexinidazole

Study Number: 0505-2007

ANIMAL: 2523                      SEX: Male                      GROUP: 3                      DOSE LEVEL: 200 mg/kg/day  
DAY OF DEATH: 29 Test period                      STATUS: Scheduled phase sacrifice # 1                      TERMINAL BODY WEIGHT (kg) : 8.10

| Tissue                     | Gross observations/comments     | Correlated Microscopic Observations                 |
|----------------------------|---------------------------------|-----------------------------------------------------|
| BONE MARROW . . . . .      | No gross observations on tissue | REDUCED CELLULARITY, Minimal.                       |
| GENER. CONDITION . . . . . | FAIRLY GOOD                     | No micropathology observations on tissue.           |
| LYMPH NODES . . . . .      | ENLARGED/ all lymph nodes.      | No micropathology observations on tissue.           |
| PERITONEAL CAV. . . . .    | CLEAR LIQUID CONTENT            | No micropathology observations on tissue.           |
| TESTES . . . . .           | SMALL, BILATERALLY              | Examined 1 correlation found:<br>IMMATURE, Present. |
|                            | FLACCID                         | Examined 1 correlation found:<br>IMMATURE, Present. |

The following tissues have no gross observations and were not examined microscopically:

|                 |                 |                  |                 |               |
|-----------------|-----------------|------------------|-----------------|---------------|
| ADRENALS        | AORTA-THORACIC  | BRAIN            | CECUM           | COLON         |
| DIAPHRAGM       | DUODENUM        | EPIDIDYIMIDES    | ESOPHAGUS       | EYES          |
| FEMUR HEAD      | GALL BLADDER    | HEART            | ILEUM           | JEJUNUM       |
| KIDNEYS         | LACRIMAL GLANDS | LIVER            | LUNG            | MAMMARY GLAND |
| SKELETAL MUSCLE | SCIATIC NERVE   | OPTIC NERVES     | PANCREAS        | PITUITARY     |
| PROSTATE        | PARATHYROID     | SPINAL CORD-CERV | MANDIBULAR S.G. | PAROTIDS      |
| SKIN            | SPLEEN          | STOMACH          | STERNUM         | THYROID       |
| THYMUS          | TONGUE          | TRACHEA          | URINARY BLADDER |               |

The following tissues have no gross observations and were marked as unremarkable microscopically:

MANDIBULAR L.N.    MESENTERIC L.N.

CONFIDENTIAL

Appendix 12  
Individual Animal Microscopic vs. Gross Observations

Fexinidazole

Study Number: 0505-2007

---

|                              |                                       |                             |                           |
|------------------------------|---------------------------------------|-----------------------------|---------------------------|
| ANIMAL: 2526                 | SEX: Male                             | GROUP: 3                    | DOSE LEVEL: 200 mg/kg/day |
| DAY OF DEATH: 30 Test period | STATUS: Scheduled phase sacrifice # 1 | TERMINAL BODY WEIGHT (kg) : | 7.60                      |

---

| Tissue                      | Gross observations/comments | Correlated Microscopic Observations       |
|-----------------------------|-----------------------------|-------------------------------------------|
| GENER. CONDITION . . . GOOD |                             | No micropathology observations on tissue. |

The following tissues have no gross observations and were not examined microscopically:

|                 |                 |                 |                 |                  |
|-----------------|-----------------|-----------------|-----------------|------------------|
| ADRENALS        | AORTA-THORACIC  | BRAIN           | CECUM           | COLON            |
| DIAPHRAGM       | DUODENUM        | EPIDIDYMIDES    | ESOPHAGUS       | EYES             |
| FEMUR HEAD      | GALL BLADDER    | HEART           | ILEUM           | JEJUNUM          |
| KIDNEYS         | LACRIMAL GLANDS | LIVER           | MANDIBULAR L.N. | MESENTERIC L.N.  |
| LUNG            | MAMMARY GLAND   | SKELETAL MUSCLE | SCIATIC NERVE   | OPTIC NERVES     |
| PANCREAS        | PITUITARY       | PROSTATE        | PARATHYROIDS    | SPINAL CORD-CERV |
| MANDIBULAR S.G. | PAROTIDS        | SKIN            | SPLEEN          | STOMACH          |
| STERNUM         | TESTES          | THYROIDS        | THYMUS          | TONGUE           |
| TRACHEA         | URINARY BLADDER |                 |                 |                  |

The following tissues have no gross observations and were marked as unremarkable microscopically:  
BONE MARROW

CONFIDENTIAL

Appendix 12  
Individual Animal Microscopic vs. Gross Observations

Fexinidazole

Study Number: 0505-2007

---

|                              |                                       |                             |                           |
|------------------------------|---------------------------------------|-----------------------------|---------------------------|
| ANIMAL: 2517                 | SEX: Male                             | GROUP: 4                    | DOSE LEVEL: 800 mg/kg/day |
| DAY OF DEATH: 29 Test period | STATUS: Scheduled phase sacrifice # 1 | TERMINAL BODY WEIGHT (kg) : | 6.87                      |

---

| Tissue                     | Gross observations/comments     | Correlated Microscopic Observations                                                                                          |
|----------------------------|---------------------------------|------------------------------------------------------------------------------------------------------------------------------|
| BONE MARROW . . . . .      | No gross observations on tissue | REDUCED CELLULARITY, Moderate.<br><br>ATROPHY OF ADIPOSE TISSUE IN STERNAL AND FEMORAL MARROW, Moderate, Diffuse.            |
| EPIDIDYMIDES . . . . .     | No gross observations on tissue | IMMATURE, Present.<br><br>LUMENAL GERM CELLS/DEBRIS, Minimal.                                                                |
| ESOPHAGUS . . . . .        | No gross observations on tissue | ACUTE INFLAMMATION, Minimal, Multifocal. / associated with submucosal glands                                                 |
| GALL BLADDER . . . . .     | No gross observations on tissue | LYMPHOCYTIC INFILTRATION, Minimal, Multifocal.                                                                               |
| GENER. CONDITION . . . . . | FAIRLY GOOD                     | No micropathology observations on tissue.                                                                                    |
| KIDNEYS . . . . .          | No gross observations on tissue | PAPILLARY MINERALIZATION, Minimal, Multifocal, Unilateral left..<br><br>ATROPHY OF ADJACENT ADIPOSE TISSUE, Slight, Diffuse. |
| LIVER . . . . .            | No gross observations on tissue | GLYCOGEN DEPLETION, Slight.                                                                                                  |
| MAMMARY GLAND . . . . .    | No gross observations on tissue | NO MAMMARY TISSUE IN THE SECTION, Present.                                                                                   |



CONFIDENTIAL

Appendix 12  
Individual Animal Microscopic vs. Gross Observations

Fexinidazole

Study Number: 0505-2007

ANIMAL: 2517                      SEX: Male                      GROUP: 4                      DOSE LEVEL: 800 mg/kg/day  
DAY OF DEATH: 29 Test period                      STATUS: Scheduled phase sacrifice # 1                      TERMINAL BODY WEIGHT (kg) : 6.87

| Tissue             | Gross observations/comments     | Correlated Microscopic Observations                   |
|--------------------|---------------------------------|-------------------------------------------------------|
| PROSTATE . . . . . | SMALL                           | Examined 1 correlation found:<br>IMMATURE, Present.   |
| PAROTIDS . . . . . | No gross observations on tissue | ACINAR ATROPHY, Minimal, Focal,<br>Unilateral..       |
| TESTES . . . . .   | SMALL, BILATERALLY              | Examined 1 correlation found:<br>IMMATURE, Present.   |
|                    | FLACCID                         | Examined 1 correlation found:<br>IMMATURE, Present.   |
| THYMUS . . . . .   | No gross observations on tissue | CYSTS, Slight, Multifocal.<br><br>INVOLUTION, Severe. |

The following tissues have no gross observations and were not examined microscopically:  
No tissue to list.

The following tissues have no gross observations and were marked as unremarkable microscopically:

|           |                 |                  |                 |                 |
|-----------|-----------------|------------------|-----------------|-----------------|
| ADRENALS  | AORTA-THORACIC  | BRAIN            | CECUM           | COLON           |
| DIAPHRAGM | DUODENUM        | EYES             | FEMUR HEAD      | HEART           |
| ILEUM     | JEJUNUM         | LACRIMAL GLANDS  | MANDIBULAR L.N. | MESENTERIC L.N. |
| LUNG      | SKELETAL MUSCLE | SCIATIC NERVE    | OPTIC NERVES    | PANCREAS        |
| PITUITARY | PARATHYROIDS    | SPINAL CORD-CERV | MANDIBULAR S.G. | SKIN            |
| SPLEEN    | STOMACH         | STERNUM          | THYROIDS        | TONGUE          |
| TRACHEA   | URINARY BLADDER |                  |                 |                 |

CONFIDENTIAL

Appendix 12  
Individual Animal Microscopic vs. Gross Observations

Fexinidazole

Study Number: 0505-2007

ANIMAL: 2519                      SEX: Male                      GROUP: 4                      DOSE LEVEL: 800 mg/kg/day  
DAY OF DEATH: 29 Test period                      STATUS: Scheduled phase sacrifice # 1                      TERMINAL BODY WEIGHT (kg) : 7.71

| Tissue                   | Gross observations/comments     | Correlated Microscopic Observations                    |
|--------------------------|---------------------------------|--------------------------------------------------------|
| AORTA-THORACIC . . . .   | No gross observations on tissue | ECTOPIC THYROID, Present.                              |
| GALL BLADDER . . . . .   | No gross observations on tissue | LYMPHOCYTIC INFILTRATION, Minimal, Multifocal.         |
| GENER. CONDITION . . . . | GOOD                            | No micropathology observations on tissue.              |
| KIDNEYS . . . . .        | No gross observations on tissue | PAPILLARY MINERALIZATION, Minimal, Multifocal.         |
| LACRIMAL GLANDS . . . .  | No gross observations on tissue | ONLY ONE GLAND AVAILABLE FOR EXAMINATION, Present.     |
| LIVER . . . . .          | No gross observations on tissue | CHRONIC INFLAMMATION, Minimal, Multifocal.             |
| LUNG . . . . .           | No gross observations on tissue | ALVEOLAR MACROPHAGE INFILTRATION, Minimal, Multifocal. |
| MAMMARY GLAND . . . . .  | No gross observations on tissue | NO MAMMARY TISSUE IN THE SECTION, Present.             |
| PANCREAS . . . . .       | No gross observations on tissue | ACINAR DEGRANULATION, Minimal, Multifocal.             |
| PARATHYROIDS . . . . .   | No gross observations on tissue | CYSTS, Minimal, Multifocal, Unilateral..               |
| TESTES . . . . .         | No gross observations on tissue | SEGMENTAL HYPOPLASIA, Minimal, Focal, Unilateral..     |



CONFIDENTIAL

Appendix 12  
Individual Animal Microscopic vs. Gross Observations

Fexinidazole

Study Number: 0505-2007

---

|                              |                                       |                             |                           |
|------------------------------|---------------------------------------|-----------------------------|---------------------------|
| ANIMAL: 2525                 | SEX: Male                             | GROUP: 4                    | DOSE LEVEL: 800 mg/kg/day |
| DAY OF DEATH: 30 Test period | STATUS: Scheduled phase sacrifice # 1 | TERMINAL BODY WEIGHT (kg) : | 9.33                      |

---

| Tissue                     | Gross observations/comments     | Correlated Microscopic Observations                      |
|----------------------------|---------------------------------|----------------------------------------------------------|
| GALL BLADDER . . . . .     | No gross observations on tissue | LYMPHOCYTIC INFILTRATION, Slight, Multifocal.            |
| GENER. CONDITION . . . . . | GOOD                            | No micropathology observations on tissue.                |
| HEART . . . . .            | No gross observations on tissue | ACUTE INFLAMMATION, Minimal, Focal. / in the septum      |
| MESENTERIC L.N. . . . .    | No gross observations on tissue | SINUS ERYTHROCYTES/ERYTHROPHAGOCYTOSIS, Minimal.         |
| LUNG . . . . .             | No gross observations on tissue | ALVEOLAR MACROPHAGE INFILTRATION, Minimal, Multifocal.   |
| MAMMARY GLAND . . . . .    | No gross observations on tissue | NO MAMMARY TISSUE IN THE SECTION, Present.               |
| PARATHYROIDS . . . . .     | No gross observations on tissue | ONLY ONE PARATHYROID AVAILABLE FOR EXAMINATION, Present. |
| PAROTIDS . . . . .         | No gross observations on tissue | ACINAR ATROPHY, Minimal, Focal, Unilateral..             |
| THYMUS . . . . .           | No gross observations on tissue | INVOLUTION, Slight.                                      |

The following tissues have no gross observations and were not examined microscopically:  
No tissue to list.

CONFIDENTIAL

Appendix 12  
Individual Animal Microscopic vs. Gross Observations

Fexinidazole

Study Number: 0505-2007

---

|                              |                                       |                             |                           |
|------------------------------|---------------------------------------|-----------------------------|---------------------------|
| ANIMAL: 2525                 | SEX: Male                             | GROUP: 4                    | DOSE LEVEL: 800 mg/kg/day |
| DAY OF DEATH: 30 Test period | STATUS: Scheduled phase sacrifice # 1 | TERMINAL BODY WEIGHT (kg) : | 9.33                      |

---

| Tissue | Gross observations/comments | Correlated Microscopic Observations |
|--------|-----------------------------|-------------------------------------|
|--------|-----------------------------|-------------------------------------|

---

The following tissues have no gross observations and were marked as unremarkable microscopically:

|                 |                |                 |                 |                  |
|-----------------|----------------|-----------------|-----------------|------------------|
| ADRENALS        | AORTA-THORACIC | BONE MARROW     | BRAIN           | CECUM            |
| COLON           | DIAPHRAGM      | DUODENUM        | EPIDIDYMIDES    | ESOPHAGUS        |
| EYES            | FEMUR HEAD     | ILEUM           | JEJUNUM         | KIDNEYS          |
| LACRIMAL GLANDS | LIVER          | MANDIBULAR L.N. | SKELETAL MUSCLE | SCIATIC NERVE    |
| OPTIC NERVES    | PANCREAS       | PITUITARY       | PROSTATE        | SPINAL CORD-CERV |
| MANDIBULAR S.G. | SKIN           | SPLEEN          | STOMACH         | STERNUM          |
| TESTES          | THYROIDS       | TONGUE          | TRACHEA         | URINARY BLADDER  |

CONFIDENTIAL

Appendix 12  
Individual Animal Microscopic vs. Gross Observations

Fexinidazole

Study Number: 0505-2007

|                              |                               |                             |                           |
|------------------------------|-------------------------------|-----------------------------|---------------------------|
| ANIMAL: 2528                 | SEX: Male                     | GROUP: 4                    | DOSE LEVEL: 800 mg/kg/day |
| DAY OF DEATH: 43 Test period | STATUS: Final phase sacrifice | TERMINAL BODY WEIGHT (kg) : | 8.53                      |

| Tissue                     | Gross observations/comments     | Correlated Microscopic Observations                                                 |
|----------------------------|---------------------------------|-------------------------------------------------------------------------------------|
| DUODENUM . . . . .         | No gross observations on tissue | CRYPT DILATATION WITH/WITHOUT LUMENAL<br>NECROTIC DEBRIS, Minimal, Focal.           |
| GALL BLADDER . . . . .     | No gross observations on tissue | LYMPHOCYTIC INFILTRATION, Minimal,<br>Multifocal.                                   |
| GENER. CONDITION . . . . . | GOOD                            | No micropathology observations on tissue.                                           |
| KIDNEYS . . . . .          | No gross observations on tissue | PAPILLARY MINERALIZATION, Minimal,<br>Multifocal.                                   |
| MESENTERIC L.N. . . . .    | No gross observations on tissue | SINUS ERYTHROCYTES/ERYTHROPHAGOCYTOSIS,<br>Minimal.                                 |
| LUNG . . . . .             | No gross observations on tissue | ALVEOLAR MACROPHAGE INFILTRATION, Minimal,<br>Multifocal.                           |
| MAMMARY GLAND . . . . .    | No gross observations on tissue | NO MAMMARY TISSUE IN THE SECTION, Present.                                          |
| PITUITARY . . . . .        | No gross observations on tissue | CYSTS, PARS DISTALIS, Slight, Focal.                                                |
| PARATHYROIDS . . . . .     | No gross observations on tissue | CYSTS, Minimal, Focal, Unilateral..                                                 |
| SKIN . . . . .             | No gross observations on tissue | CHRONIC INFLAMMATION, Minimal, Focal,<br>Granulomatous. / periadnexal in the dermis |

CONFIDENTIAL

Appendix 12  
Individual Animal Microscopic vs. Gross Observations

Fexinidazole

Study Number: 0505-2007

---

|                              |                               |                             |                           |
|------------------------------|-------------------------------|-----------------------------|---------------------------|
| ANIMAL: 2528                 | SEX: Male                     | GROUP: 4                    | DOSE LEVEL: 800 mg/kg/day |
| DAY OF DEATH: 43 Test period | STATUS: Final phase sacrifice | TERMINAL BODY WEIGHT (kg) : | 8.53                      |

---

| Tissue | Gross observations/comments | Correlated Microscopic Observations |
|--------|-----------------------------|-------------------------------------|
|--------|-----------------------------|-------------------------------------|

---

|                    |                                 |                                                  |
|--------------------|---------------------------------|--------------------------------------------------|
| THYROIDS . . . . . | No gross observations on tissue | CYSTIC FOLLICLES, Slight, Focal,<br>Unilateral.. |
|--------------------|---------------------------------|--------------------------------------------------|

|                  |                                 |                     |
|------------------|---------------------------------|---------------------|
| THYMUS . . . . . | No gross observations on tissue | INVOLUTION, Marked. |
|------------------|---------------------------------|---------------------|

The following tissues have no gross observations and were not examined microscopically:  
No tissue to list.

The following tissues have no gross observations and were marked as unremarkable microscopically:

|            |                 |                  |                 |                 |
|------------|-----------------|------------------|-----------------|-----------------|
| ADRENALS   | AORTA-THORACIC  | BONE MARROW      | BRAIN           | CECUM           |
| COLON      | DIAPHRAGM       | EPIDIDYMIDES     | ESOPHAGUS       | EYES            |
| FEMUR HEAD | HEART           | ILEUM            | JEJUNUM         | LACRIMAL GLANDS |
| LIVER      | MANDIBULAR L.N. | SKELETAL MUSCLE  | SCIATIC NERVE   | OPTIC NERVES    |
| PANCREAS   | PROSTATE        | SPINAL CORD-CERV | MANDIBULAR S.G. | PAROTIDS        |
| SPLEEN     | STOMACH         | STERNUM          | TESTES          | TONGUE          |
| TRACHEA    | URINARY BLADDER |                  |                 |                 |

CONFIDENTIAL

Appendix 12  
Individual Animal Microscopic vs. Gross Observations

Fexinidazole

Study Number: 0505-2007

ANIMAL: 2530                      SEX: Male                      GROUP: 4                      DOSE LEVEL: 800 mg/kg/day  
DAY OF DEATH: 43 Test period                      STATUS: Final phase sacrifice                      TERMINAL BODY WEIGHT (kg) : 6.66

| Tissue                     | Gross observations/comments     | Correlated Microscopic Observations                                          |
|----------------------------|---------------------------------|------------------------------------------------------------------------------|
| GALL BLADDER . . . . .     | No gross observations on tissue | LYMPHOCYTIC INFILTRATION, Minimal, Focal.                                    |
| GENER. CONDITION . . . . . | FAIRLY GOOD                     | No micropathology observations on tissue.                                    |
| KIDNEYS . . . . .          | No gross observations on tissue | CORTICAL TUBULAR REGENERATIVE BASOPHILIA, Minimal, Focal, Unilateral right.. |
| MAMMARY GLAND . . . . .    | No gross observations on tissue | NO MAMMARY TISSUE IN THE SECTION, Present.                                   |
| PROSTATE . . . . .         | SMALL                           | Examined 1 correlation found:<br>IMMATURE, Present.                          |
| PARATHYROIDS . . . . .     | No gross observations on tissue | ONLY ONE PARATHYROID AVAILABLE FOR EXAMINATION, Present.                     |
| PAROTIDS . . . . .         | No gross observations on tissue | ACINAR ATROPHY, Slight, Focal, Unilateral..                                  |
| THYMUS . . . . .           | No gross observations on tissue | CYSTS, Minimal, Multifocal.<br>INVOLUTION, Marked.                           |

The following tissues have no gross observations and were not examined microscopically:  
No tissue to list.

The following tissues have no gross observations and were marked as unremarkable microscopically:  
ADRENALS                      AORTA-THORACIC                      BONE MARROW                      BRAIN                      CECUM



CONFIDENTIAL

Appendix 12  
Individual Animal Microscopic vs. Gross Observations

Fexinidazole

Study Number: 0505-2007

---

|                              |                               |                             |                           |
|------------------------------|-------------------------------|-----------------------------|---------------------------|
| ANIMAL: 2530                 | SEX: Male                     | GROUP: 4                    | DOSE LEVEL: 800 mg/kg/day |
| DAY OF DEATH: 43 Test period | STATUS: Final phase sacrifice | TERMINAL BODY WEIGHT (kg) : | 6.66                      |

---

| Tissue | Gross observations/comments | Correlated Microscopic Observations |
|--------|-----------------------------|-------------------------------------|
|--------|-----------------------------|-------------------------------------|

---

The following tissues have no gross observations and were marked as unremarkable microscopically:

|                  |                 |                 |                 |           |
|------------------|-----------------|-----------------|-----------------|-----------|
| COLON            | DIAPHRAGM       | DUODENUM        | EPIDIDYIMIDES   | ESOPHAGUS |
| EYES             | FEMUR HEAD      | HEART           | ILEUM           | JEJUNUM   |
| LACRIMAL GLANDS  | LIVER           | MANDIBULAR L.N. | MESENTERIC L.N. | LUNG      |
| SKELETAL MUSCLE  | SCIATIC NERVE   | OPTIC NERVES    | PANCREAS        | PITUITARY |
| SPINAL CORD-CERV | MANDIBULAR S.G. | SKIN            | SPLEEN          | STOMACH   |
| STERNUM          | TESTES          | THYROIDS        | TONGUE          | TRACHEA   |
| URINARY BLADDER  |                 |                 |                 |           |

CONFIDENTIAL

Appendix 12  
Individual Animal Microscopic vs. Gross Observations

Fexinidazole

Study Number: 0505-2007

---

|                              |                                       |                             |                     |
|------------------------------|---------------------------------------|-----------------------------|---------------------|
| ANIMAL: 2560                 | SEX: Female                           | GROUP: 1                    | DOSE LEVEL: Vehicle |
| DAY OF DEATH: 29 Test period | STATUS: Scheduled phase sacrifice # 1 | TERMINAL BODY WEIGHT (kg) : | 6.35                |

---

| Tissue                     | Gross observations/comments     | Correlated Microscopic Observations                                                                                                                      |
|----------------------------|---------------------------------|----------------------------------------------------------------------------------------------------------------------------------------------------------|
| GALL BLADDER . . . . .     | No gross observations on tissue | LYMPHOCYTIC INFILTRATION, Minimal, Multifocal.                                                                                                           |
| GENER. CONDITION . . . . . | GOOD                            | No micropathology observations on tissue.                                                                                                                |
| HEART . . . . .            | No gross observations on tissue | MESOTHELIAL HYPERPLASIA, ATRIAL, Slight, Multifocal, Unilateral left..                                                                                   |
| KIDNEYS . . . . .          | No gross observations on tissue | CHRONIC INFLAMMATION, Minimal, Focal, Unilateral right..<br><br>PAPILLARY MINERALIZATION, Minimal, Multifocal.                                           |
| LIVER . . . . .            | No gross observations on tissue | HEPATOCELLULAR VACUOLATION, Slight, Multifocal.                                                                                                          |
| MANDIBULAR L.N. . . . .    | No gross observations on tissue | SINUS ERYTHROCYTES/ERYTHROPHAGOCYTOSIS, Minimal, Unilateral..                                                                                            |
| MESENTERIC L.N. . . . .    | No gross observations on tissue | SINUS ERYTHROCYTES/ERYTHROPHAGOCYTOSIS, Minimal.                                                                                                         |
| LUNG . . . . .             | No gross observations on tissue | ACUTE INFLAMMATION, Minimal, Multifocal.<br><br>CHRONIC INFLAMMATION, Minimal, Multifocal.<br><br>ALVEOLAR MACROPHAGE INFILTRATION, Minimal, Multifocal. |

CONFIDENTIAL

Appendix 12  
Individual Animal Microscopic vs. Gross Observations

Fexinidazole

Study Number: 0505-2007

ANIMAL: 2560                      SEX: Female                      GROUP: 1                      DOSE LEVEL: Vehicle  
DAY OF DEATH: 29 Test period                      STATUS: Scheduled phase sacrifice # 1                      TERMINAL BODY WEIGHT (kg) : 6.35

| Tissue                    | Gross observations/comments     | Correlated Microscopic Observations                      |
|---------------------------|---------------------------------|----------------------------------------------------------|
| MAMMARY GLAND . . . . .   | No gross observations on tissue | NO MAMMARY TISSUE IN THE SECTION, Present.               |
| OVARIES . . . . .         | No gross observations on tissue | IMMATURE, Present.                                       |
| PERITONEAL CAV. . . . .   | CLEAR LIQUID CONTENT            | No micropathology observations on tissue.                |
| PARATHYROIDS . . . . .    | No gross observations on tissue | ONLY ONE PARATHYROID AVAILABLE FOR EXAMINATION, Present. |
| STAGE OF ESTRUS . . . . . | No gross observations on tissue | IMMATURE, Present.                                       |
| MANDIBULAR S.G. . . . .   | No gross observations on tissue | LYMPHOCYTIC INFILTRATION, Minimal, Focal, Unilateral..   |
| THYMUS . . . . .          | No gross observations on tissue | INVOLUTION, Moderate.                                    |
| TONGUE . . . . .          | No gross observations on tissue | CHRONIC INFLAMMATION, Minimal, Multifocal.               |
| UTERUS . . . . .          | No gross observations on tissue | IMMATURE, Present.                                       |

The following tissues have no gross observations and were not examined microscopically:  
No tissue to list.

The following tissues have no gross observations and were marked as unremarkable microscopically:  
ADRENALS                      AORTA-THORACIC                      BONE MARROW                      BRAIN                      CECUM

CONFIDENTIAL

Appendix 12  
Individual Animal Microscopic vs. Gross Observations

Fexinidazole

Study Number: 0505-2007

---

|                              |                                       |                             |                     |
|------------------------------|---------------------------------------|-----------------------------|---------------------|
| ANIMAL: 2560                 | SEX: Female                           | GROUP: 1                    | DOSE LEVEL: Vehicle |
| DAY OF DEATH: 29 Test period | STATUS: Scheduled phase sacrifice # 1 | TERMINAL BODY WEIGHT (kg) : | 6.35                |

---

| Tissue | Gross observations/comments | Correlated Microscopic Observations |
|--------|-----------------------------|-------------------------------------|
|--------|-----------------------------|-------------------------------------|

---

The following tissues have no gross observations and were marked as unremarkable microscopically:

|               |              |                 |                 |                  |
|---------------|--------------|-----------------|-----------------|------------------|
| COLON         | DIAPHRAGM    | DUODENUM        | ESOPHAGUS       | EYES             |
| FEMUR HEAD    | ILEUM        | JEJUNUM         | LACRIMAL GLANDS | SKELETAL MUSCLE  |
| SCIATIC NERVE | OPTIC NERVES | PANCREAS        | PITUITARY       | SPINAL CORD-CERV |
| PAROTIDS      | SKIN         | SPLEEN          | STOMACH         | STERNUM          |
| THYROIDS      | TRACHEA      | URINARY BLADDER | VAGINA          |                  |

CONFIDENTIAL

Appendix 12  
Individual Animal Microscopic vs. Gross Observations

Fexinidazole

Study Number: 0505-2007

|                              |                                       |                             |                     |
|------------------------------|---------------------------------------|-----------------------------|---------------------|
| ANIMAL: 2568                 | SEX: Female                           | GROUP: 1                    | DOSE LEVEL: Vehicle |
| DAY OF DEATH: 30 Test period | STATUS: Scheduled phase sacrifice # 1 | TERMINAL BODY WEIGHT (kg) : | 6.90                |

| Tissue                     | Gross observations/comments     | Correlated Microscopic Observations                          |
|----------------------------|---------------------------------|--------------------------------------------------------------|
| ESOPHAGUS . . . . .        | No gross observations on tissue | CHRONIC INFLAMMATION, Minimal, Multifocal.<br>/ in submucosa |
| GALL BLADDER . . . . .     | No gross observations on tissue | LYMPHOCYTIC INFILTRATION, Slight,<br>Multifocal.             |
| GENER. CONDITION . . . . . | GOOD                            | No micropathology observations on tissue.                    |
| KIDNEYS . . . . .          | No gross observations on tissue | PAPILLARY MINERALIZATION, Minimal,<br>Multifocal.            |
| LIVER . . . . .            | No gross observations on tissue | EXTRAMEDULLARY HEMATOPOIESIS, Minimal,<br>Multifocal.        |
| MESENTERIC L.N. . . . .    | No gross observations on tissue | SINUS ERYTHROCYTES/ERYTHROPHAGOCYTOSIS,<br>Minimal.          |
| LUNG . . . . .             | No gross observations on tissue | ALVEOLAR MACROPHAGE INFILTRATION, Minimal,<br>Multifocal.    |
| MAMMARY GLAND . . . . .    | No gross observations on tissue | NO MAMMARY TISSUE IN THE SECTION, Present.                   |
| OVARIES . . . . .          | No gross observations on tissue | IMMATURE, Present.                                           |
| PITUITARY . . . . .        | No gross observations on tissue | CYSTS, PARS DISTALIS, Minimal, Focal.                        |

CONFIDENTIAL

Appendix 12  
Individual Animal Microscopic vs. Gross Observations

Fexinidazole

Study Number: 0505-2007

ANIMAL: 2568                      SEX: Female                      GROUP: 1                      DOSE LEVEL: Vehicle  
DAY OF DEATH: 30 Test period                      STATUS: Scheduled phase sacrifice # 1                      TERMINAL BODY WEIGHT (kg) : 6.90

| Tissue                    | Gross observations/comments     | Correlated Microscopic Observations                                                         |
|---------------------------|---------------------------------|---------------------------------------------------------------------------------------------|
| PARATHYROIDS . . . . .    | No gross observations on tissue | ONLY ONE PARATHYROID AVAILABLE FOR EXAMINATION, Present.<br><br>CYSTS, Minimal, Multifocal. |
| STAGE OF ESTRUS . . . . . | No gross observations on tissue | IMMATURE, Present.                                                                          |
| PAROTIDS . . . . .        | No gross observations on tissue | ACINAR ATROPHY, Minimal, Focal, Unilateral..                                                |
| THYMUS . . . . .          | No gross observations on tissue | INVOLUTION, Marked.                                                                         |

The following tissues have no gross observations and were not examined microscopically:  
No tissue to list.

The following tissues have no gross observations and were marked as unremarkable microscopically:

|                 |                |              |                 |                  |
|-----------------|----------------|--------------|-----------------|------------------|
| ADRENALS        | AORTA-THORACIC | BONE MARROW  | BRAIN           | CECUM            |
| COLON           | DIAPHRAGM      | DUODENUM     | EYES            | FEMUR HEAD       |
| HEART           | ILEUM          | JEJUNUM      | LACRIMAL GLANDS | MANDIBULAR L.N.  |
| SKELETAL MUSCLE | SCIATIC NERVE  | OPTIC NERVES | PANCREAS        | SPINAL CORD-CERV |
| MANDIBULAR S.G. | SKIN           | SPLEEN       | STOMACH         | STERNUM          |
| THYROIDS        | TONGUE         | TRACHEA      | URINARY BLADDER | UTERUS           |
| VAGINA          |                |              |                 |                  |

CONFIDENTIAL

Appendix 12  
Individual Animal Microscopic vs. Gross Observations

Fexinidazole

Study Number: 0505-2007

ANIMAL: 2572                      SEX: Female                      GROUP: 1                      DOSE LEVEL: Vehicle  
DAY OF DEATH: 30 Test period                      STATUS: Scheduled phase sacrifice # 1                      TERMINAL BODY WEIGHT (kg) : 6.60

| Tissue                     | Gross observations/comments     | Correlated Microscopic Observations                                                                    |
|----------------------------|---------------------------------|--------------------------------------------------------------------------------------------------------|
| GALL BLADDER . . . . .     | No gross observations on tissue | LYMPHOCYTIC INFILTRATION, Minimal, Focal.                                                              |
| GENER. CONDITION . . . . . | FAIRLY GOOD                     | No micropathology observations on tissue.                                                              |
| KIDNEYS . . . . .          | No gross observations on tissue | PAPILLARY MINERALIZATION, Minimal, Multifocal.                                                         |
| LACRIMAL GLANDS . . . . .  | No gross observations on tissue | ONLY ONE GLAND AVAILABLE FOR EXAMINATION, Present.                                                     |
| MESENTERIC L.N. . . . .    | No gross observations on tissue | SINUS ERYTHROCYTES/ERYTHROPHAGOCYTOSIS, Minimal.                                                       |
| LUNG . . . . .             | No gross observations on tissue | ACUTE INFLAMMATION, Minimal, Multifocal.<br><br>ALVEOLAR MACROPHAGE INFILTRATION, Minimal, Multifocal. |
| MAMMARY GLAND . . . . .    | No gross observations on tissue | NO MAMMARY TISSUE IN THE SECTION, Present.                                                             |
| OVARIES . . . . .          | No gross observations on tissue | IMMATURE, Present.                                                                                     |
| PERITONEAL CAV. . . . .    | CLEAR LIQUID CONTENT            | No micropathology observations on tissue.                                                              |
| PARATHYROIDS . . . . .     | No gross observations on tissue | ONLY ONE PARATHYROID AVAILABLE FOR EXAMINATION, Present.                                               |

CONFIDENTIAL

Appendix 12  
Individual Animal Microscopic vs. Gross Observations

Fexinidazole

Study Number: 0505-2007

ANIMAL: 2572                      SEX: Female                      GROUP: 1                      DOSE LEVEL: Vehicle  
DAY OF DEATH: 30 Test period                      STATUS: Scheduled phase sacrifice # 1                      TERMINAL BODY WEIGHT (kg) : 6.60

| Tissue                  | Gross observations/comments     | Correlated Microscopic Observations                                                  |
|-------------------------|---------------------------------|--------------------------------------------------------------------------------------|
| STAGE OF ESTRUS . . . . | No gross observations on tissue | IMMATURE, Present.                                                                   |
| PAROTIDS . . . . .      | No gross observations on tissue | ACINAR ATROPHY, Minimal, Focal, Unilateral..                                         |
| THYMUS . . . . .        | SMALL                           | Examined 1 correlation found:<br>INVOLUTION, Moderate.<br><br>CYSTS, Minimal, Focal. |
| TRACHEA . . . . .       | No gross observations on tissue | ACUTE INFLAMMATION, Minimal, Multifocal.                                             |
| UTERUS . . . . .        | No gross observations on tissue | IMMATURE, Present.                                                                   |

The following tissues have no gross observations and were not examined microscopically:  
No tissue to list.

The following tissues have no gross observations and were marked as unremarkable microscopically:

|                 |                  |                 |              |                 |
|-----------------|------------------|-----------------|--------------|-----------------|
| ADRENALS        | AORTA-THORACIC   | BONE MARROW     | BRAIN        | CECUM           |
| COLON           | DIAPHRAGM        | DUODENUM        | ESOPHAGUS    | EYES            |
| FEMUR HEAD      | HEART            | ILEUM           | JEJUNUM      | LIVER           |
| MANDIBULAR L.N. | SKELETAL MUSCLE  | SCIATIC NERVE   | OPTIC NERVES | PANCREAS        |
| PITUITARY       | SPINAL CORD-CERV | MANDIBULAR S.G. | SKIN         | SPLEEN          |
| STOMACH         | STERNUM          | THYROIDS        | TONGUE       | URINARY BLADDER |
| VAGINA          |                  |                 |              |                 |



CONFIDENTIAL

Appendix 12  
Individual Animal Microscopic vs. Gross Observations

Fexinidazole

Study Number: 0505-2007

|                              |                               |                             |                     |
|------------------------------|-------------------------------|-----------------------------|---------------------|
| ANIMAL: 2575                 | SEX: Female                   | GROUP: 1                    | DOSE LEVEL: Vehicle |
| DAY OF DEATH: 43 Test period | STATUS: Final phase sacrifice | TERMINAL BODY WEIGHT (kg) : | 8.11                |

| Tissue                     | Gross observations/comments     | Correlated Microscopic Observations                                                                            |
|----------------------------|---------------------------------|----------------------------------------------------------------------------------------------------------------|
| GALL BLADDER . . . . .     | No gross observations on tissue | LYMPHOCYTIC INFILTRATION, Slight, Multifocal.                                                                  |
| GENER. CONDITION . . . . . | GOOD                            | No micropathology observations on tissue.                                                                      |
| KIDNEYS . . . . .          | No gross observations on tissue | CHRONIC INFLAMMATION, Minimal, Focal, Unilateral right..<br><br>PAPILLARY MINERALIZATION, Minimal, Multifocal. |
| LIVER . . . . .            | No gross observations on tissue | EXTRAMEDULLARY HEMATOPOIESIS, Minimal, Multifocal.                                                             |
| MESENTERIC L.N. . . . .    | No gross observations on tissue | SINUS ERYTHROCYTES/ERYTHROPHAGOCYTOSIS, Minimal.                                                               |
| LUNG . . . . .             | No gross observations on tissue | CHRONIC INFLAMMATION, Minimal, Multifocal.<br><br>ALVEOLAR MACROPHAGE INFILTRATION, Slight, Multifocal.        |
| MAMMARY GLAND . . . . .    | No gross observations on tissue | EDEMA, Minimal.<br><br>STROMAL PROLIFERATION, Minimal.<br><br>DUCTAL-ALVEOLAR HYPERPLASIA, Minimal.            |

CONFIDENTIAL

Appendix 12  
Individual Animal Microscopic vs. Gross Observations

Fexinidazole

Study Number: 0505-2007

|                              |                               |                             |                     |
|------------------------------|-------------------------------|-----------------------------|---------------------|
| ANIMAL: 2575                 | SEX: Female                   | GROUP: 1                    | DOSE LEVEL: Vehicle |
| DAY OF DEATH: 43 Test period | STATUS: Final phase sacrifice | TERMINAL BODY WEIGHT (kg) : | 8.11                |

| Tissue                    | Gross observations/comments     | Correlated Microscopic Observations                                    |
|---------------------------|---------------------------------|------------------------------------------------------------------------|
| OVARIES . . . . .         | No gross observations on tissue | CORPORA LUTEA, Present.                                                |
| PARATHYROIDS . . . . .    | No gross observations on tissue | ONLY ONE PARATHYROID AVAILABLE FOR EXAMINATION, Present.               |
| STAGE OF ESTRUS . . . . . | No gross observations on tissue | DIESTRUS, Present.                                                     |
| MANDIBULAR S.G. . . . .   | No gross observations on tissue | LYMPHOCYTIC INFILTRATION, Minimal, Focal, Unilateral..                 |
| PAROTIDS . . . . .        | No gross observations on tissue | ACINAR ATROPHY, Minimal, Multifocal, Unilateral..                      |
| SPLEEN . . . . .          | No gross observations on tissue | EXTRAMEDULLARY HEMATOPOIESIS, Minimal.                                 |
| STOMACH . . . . .         | No gross observations on tissue | GASTRITIS, Slight, Multifocal, Chronic active. / in the pyloric region |
| THYMUS . . . . .          | No gross observations on tissue | INVOLUTION, Minimal.                                                   |
| UTERUS . . . . .          | No gross observations on tissue | ENDOMETRIAL GLAND HYPERTROPHY/HYPERPLASIA, Slight, Diffuse.            |

The following tissues have no gross observations and were not examined microscopically:  
No tissue to list.

CONFIDENTIAL

Appendix 12  
Individual Animal Microscopic vs. Gross Observations

Fexinidazole

Study Number: 0505-2007

---

|                              |                               |                             |                     |
|------------------------------|-------------------------------|-----------------------------|---------------------|
| ANIMAL: 2575                 | SEX: Female                   | GROUP: 1                    | DOSE LEVEL: Vehicle |
| DAY OF DEATH: 43 Test period | STATUS: Final phase sacrifice | TERMINAL BODY WEIGHT (kg) : | 8.11                |

---

| Tissue | Gross observations/comments | Correlated Microscopic Observations |
|--------|-----------------------------|-------------------------------------|
|--------|-----------------------------|-------------------------------------|

---

The following tissues have no gross observations and were marked as unremarkable microscopically:

|                 |                  |                 |              |                 |
|-----------------|------------------|-----------------|--------------|-----------------|
| ADRENALS        | AORTA-THORACIC   | BONE MARROW     | BRAIN        | CECUM           |
| COLON           | DIAPHRAGM        | DUODENUM        | ESOPHAGUS    | EYES            |
| FEMUR HEAD      | HEART            | ILEUM           | JEJUNUM      | LACRIMAL GLANDS |
| MANDIBULAR L.N. | SKELETAL MUSCLE  | SCIATIC NERVE   | OPTIC NERVES | PANCREAS        |
| PITUITARY       | SPINAL CORD-CERV | SKIN            | STERNUM      | THYROIDS        |
| TONGUE          | TRACHEA          | URINARY BLADDER | VAGINA       |                 |

CONFIDENTIAL

Appendix 12  
Individual Animal Microscopic vs. Gross Observations

Fexinidazole

Study Number: 0505-2007

|                              |                               |                             |                     |
|------------------------------|-------------------------------|-----------------------------|---------------------|
| ANIMAL: 2577                 | SEX: Female                   | GROUP: 1                    | DOSE LEVEL: Vehicle |
| DAY OF DEATH: 43 Test period | STATUS: Final phase sacrifice | TERMINAL BODY WEIGHT (kg) : | 8.55                |

| Tissue                     | Gross observations/comments     | Correlated Microscopic Observations                                                                                                                                                                                       |
|----------------------------|---------------------------------|---------------------------------------------------------------------------------------------------------------------------------------------------------------------------------------------------------------------------|
| GALL BLADDER . . . . .     | No gross observations on tissue | LYMPHOCYTIC INFILTRATION, Minimal, Multifocal.                                                                                                                                                                            |
| GENER. CONDITION . . . . . | GOOD                            | No micropathology observations on tissue.                                                                                                                                                                                 |
| KIDNEYS . . . . .          | No gross observations on tissue | PAPILLARY MINERALIZATION, Minimal, Multifocal.<br><br>CORTICAL TUBULAR DILATION, Minimal, Multifocal.<br><br>CORTICAL FIBROSIS, Minimal, Multifocal.<br><br>CORTICAL TUBULAR REGENERATIVE BASOPHILIA, Slight, Multifocal. |
| MESENTERIC L.N. . . . .    | No gross observations on tissue | SINUS ERYTHROCYTES/ERYTHROPHAGOCYTOSIS, Minimal.                                                                                                                                                                          |
| LUNG . . . . .             | No gross observations on tissue | ALVEOLAR HEMORRHAGE, Minimal, Multifocal.<br><br>ALVEOLAR MACROPHAGE INFILTRATION, Minimal, Multifocal.                                                                                                                   |
| MAMMARY GLAND . . . . .    | No gross observations on tissue | EDEMA, Slight.<br><br>STROMAL PROLIFERATION, Moderate.<br><br>DUCTAL-ALVEOLAR HYPERPLASIA, Moderate.                                                                                                                      |

CONFIDENTIAL

Appendix 12  
Individual Animal Microscopic vs. Gross Observations

Fexinidazole

Study Number: 0505-2007

|                              |                               |                             |                     |
|------------------------------|-------------------------------|-----------------------------|---------------------|
| ANIMAL: 2577                 | SEX: Female                   | GROUP: 1                    | DOSE LEVEL: Vehicle |
| DAY OF DEATH: 43 Test period | STATUS: Final phase sacrifice | TERMINAL BODY WEIGHT (kg) : | 8.55                |

| Tissue                    | Gross observations/comments     | Correlated Microscopic Observations                                     |
|---------------------------|---------------------------------|-------------------------------------------------------------------------|
| OVARIES . . . . .         | No gross observations on tissue | CORPORA LUTEA, Present.                                                 |
| PANCREAS . . . . .        | No gross observations on tissue | ACINAR APOPTOSIS, Minimal, Multifocal.                                  |
| PITUITARY . . . . .       | No gross observations on tissue | CYSTS, PARS DISTALIS, Slight, Multifocal.                               |
| PARATHYROIDS . . . . .    | No gross observations on tissue | ONLY ONE PARATHYROID AVAILABLE FOR EXAMINATION, Present.                |
| STAGE OF ESTRUS . . . . . | No gross observations on tissue | DIESTRUS, Present.                                                      |
| STOMACH . . . . .         | No gross observations on tissue | GASTRITIS, Minimal, Multifocal, Chronic active. / in the pyloric region |
| THYMUS . . . . .          | No gross observations on tissue | INVOLUTION, Minimal.                                                    |
| UTERUS . . . . .          | No gross observations on tissue | ENDOMETRIAL GLAND HYPERTROPHY/HYPERPLASIA, Slight, Diffuse.             |

The following tissues have no gross observations and were not examined microscopically:  
No tissue to list.

The following tissues have no gross observations and were marked as unremarkable microscopically:  
ADRENALS            AORTA-THORACIC        BONE MARROW            BRAIN            CECUM

CONFIDENTIAL

Appendix 12  
Individual Animal Microscopic vs. Gross Observations

Fexinidazole

Study Number: 0505-2007

---

|                              |                               |                             |                     |
|------------------------------|-------------------------------|-----------------------------|---------------------|
| ANIMAL: 2577                 | SEX: Female                   | GROUP: 1                    | DOSE LEVEL: Vehicle |
| DAY OF DEATH: 43 Test period | STATUS: Final phase sacrifice | TERMINAL BODY WEIGHT (kg) : | 8.55                |

---

| Tissue | Gross observations/comments | Correlated Microscopic Observations |
|--------|-----------------------------|-------------------------------------|
|--------|-----------------------------|-------------------------------------|

---

The following tissues have no gross observations and were marked as unremarkable microscopically:

|                  |                 |                 |               |                 |
|------------------|-----------------|-----------------|---------------|-----------------|
| COLON            | DIAPHRAGM       | DUODENUM        | ESOPHAGUS     | EYES            |
| FEMUR HEAD       | HEART           | ILEUM           | JEJUNUM       | LACRIMAL GLANDS |
| LIVER            | MANDIBULAR L.N. | SKELETAL MUSCLE | SCIATIC NERVE | OPTIC NERVES    |
| SPINAL CORD-CERV | MANDIBULAR S.G. | PAROTIDS        | SKIN          | SPLEEN          |
| STERNUM          | THYROIDS        | TONGUE          | TRACHEA       | URINARY BLADDER |
| VAGINA           |                 |                 |               |                 |

CONFIDENTIAL

Appendix 12  
Individual Animal Microscopic vs. Gross Observations

Fexinidazole

Study Number: 0505-2007

ANIMAL: 2562                      SEX: Female                      GROUP: 2                      DOSE LEVEL: 50 mg/kg/day  
DAY OF DEATH: 29 Test period                      STATUS: Scheduled phase sacrifice # 1                      TERMINAL BODY WEIGHT (kg) : 6.57

| Tissue                    | Gross observations/comments     | Correlated Microscopic Observations                                                                                 |
|---------------------------|---------------------------------|---------------------------------------------------------------------------------------------------------------------|
| GENER. CONDITION . . .    | GOOD                            | No micropathology observations on tissue.                                                                           |
| MAMMARY GLAND . . . . .   | No gross observations on tissue | EDEMA, Slight.<br>STROMAL PROLIFERATION, Moderate.<br>DUCTAL-ALVEOLAR HYPERPLASIA, Slight.                          |
| OVARIES . . . . .         | No gross observations on tissue | CORPORA LUTEA, Present.                                                                                             |
| STAGE OF ESTRUS . . . . . | No gross observations on tissue | DIESTRUS, Present.                                                                                                  |
| UTERUS . . . . .          | No gross observations on tissue | ENDOMETRIAL GLAND HYPERTROPHY/HYPERPLASIA, Minimal.<br>EOSINOPHILIC SECRETORY MATERIAL IN GLANDULAR LUMEN, Minimal. |

The following tissues have no gross observations and were not examined microscopically:

|            |                 |                  |                 |                 |
|------------|-----------------|------------------|-----------------|-----------------|
| ADRENALS   | AORTA-THORACIC  | BONE MARROW      | BRAIN           | CECUM           |
| COLON      | DIAPHRAGM       | DUODENUM         | ESOPHAGUS       | EYES            |
| FEMUR HEAD | GALL BLADDER    | HEART            | ILEUM           | JEJUNUM         |
| KIDNEYS    | LACRIMAL GLANDS | LIVER            | MANDIBULAR L.N. | MESENTERIC L.N. |
| LUNG       | SKELETAL MUSCLE | SCIATIC NERVE    | OPTIC NERVES    | PANCREAS        |
| PITUITARY  | PARATHYROIDS    | SPINAL CORD-CERV | MANDIBULAR S.G. | PAROTIDS        |
| SKIN       | SPLEEN          | STOMACH          | STERNUM         | THYROIDS        |
| THYMUS     | TONGUE          | TRACHEA          | URINARY BLADDER |                 |

The following tissues have no gross observations and were marked as unremarkable microscopically:

VAGINA

CONFIDENTIAL

Appendix 12  
Individual Animal Microscopic vs. Gross Observations

Fexinidazole

Study Number: 0505-2007

ANIMAL: 2563                                      SEX: Female                                      GROUP: 2                                      DOSE LEVEL: 50 mg/kg/day  
DAY OF DEATH: 30 Test period                                      STATUS: Scheduled phase sacrifice # 1                                      TERMINAL BODY WEIGHT (kg) : 7.61

Tissue                                      Gross observations/comments                                      Correlated Microscopic Observations

GENER. CONDITION . . . . . GOOD                                      No micropathology observations on tissue.  
MAMMARY GLAND . . . . . No gross observations on tissue                                      IMMATURE, Present.  
STAGE OF ESTRUS . . . . . No gross observations on tissue                                      ESTRUS, Present.  
UTERUS . . . . . No gross observations on tissue                                      ENDOMETRIAL GLAND HYPERTROPHY/HYPERPLASIA,  
Minimal.

The following tissues have no gross observations and were not examined microscopically:

|            |                 |                  |                 |                 |
|------------|-----------------|------------------|-----------------|-----------------|
| ADRENALS   | AORTA-THORACIC  | BONE MARROW      | BRAIN           | CECUM           |
| COLON      | DIAPHRAGM       | DUODENUM         | ESOPHAGUS       | EYES            |
| FEMUR HEAD | GALL BLADDER    | HEART            | ILEUM           | JEJUNUM         |
| KIDNEYS    | LACRIMAL GLANDS | LIVER            | MANDIBULAR L.N. | MESENTERIC L.N. |
| LUNG       | SKELETAL MUSCLE | SCIATIC NERVE    | OPTIC NERVES    | PANCREAS        |
| PITUITARY  | PARATHYROIDS    | SPINAL CORD-CERV | MANDIBULAR S.G. | PAROTIDS        |
| SKIN       | SPLEEN          | STOMACH          | STERNUM         | THYROIDS        |
| THYMUS     | TONGUE          | TRACHEA          | URINARY BLADDER |                 |

The following tissues have no gross observations and were marked as unremarkable microscopically:

OVARIES                                      VAGINA



CONFIDENTIAL

Appendix 12  
Individual Animal Microscopic vs. Gross Observations

Fexinidazole

Study Number: 0505-2007

ANIMAL: 2576                      SEX: Female                      GROUP: 2                      DOSE LEVEL: 50 mg/kg/day  
DAY OF DEATH: 30 Test period                      STATUS: Scheduled phase sacrifice # 1                      TERMINAL BODY WEIGHT (kg) : 8.38

| Tissue                     | Gross observations/comments     | Correlated Microscopic Observations                                                         |
|----------------------------|---------------------------------|---------------------------------------------------------------------------------------------|
| GENER. CONDITION . . . . . | GOOD                            | No micropathology observations on tissue.                                                   |
| MAMMARY GLAND . . . . .    | No gross observations on tissue | EDEMA, Minimal.<br>STROMAL PROLIFERATION, Minimal.<br>DUCTAL-ALVEOLAR HYPERPLASIA, Minimal. |
| OVARIES . . . . .          | No gross observations on tissue | CORPORA LUTEA, Present.                                                                     |
| STAGE OF ESTRUS . . . . .  | No gross observations on tissue | DIESTRUS, Present.                                                                          |
| UTERUS . . . . .           | No gross observations on tissue | ENDOMETRIAL GLAND HYPERTROPHY/HYPERPLASIA,<br>Moderate.                                     |

The following tissues have no gross observations and were not examined microscopically:

|            |                 |                  |                 |                 |
|------------|-----------------|------------------|-----------------|-----------------|
| ADRENALS   | AORTA-THORACIC  | BONE MARROW      | BRAIN           | CECUM           |
| COLON      | DIAPHRAGM       | DUODENUM         | ESOPHAGUS       | EYES            |
| FEMUR HEAD | GALL BLADDER    | HEART            | ILEUM           | JEJUNUM         |
| KIDNEYS    | LACRIMAL GLANDS | LIVER            | MANDIBULAR L.N. | MESENTERIC L.N. |
| LUNG       | SKELETAL MUSCLE | SCIATIC NERVE    | OPTIC NERVES    | PANCREAS        |
| PITUITARY  | PARATHYROIDS    | SPINAL CORD-CERV | MANDIBULAR S.G. | PAROTIDS        |
| SKIN       | SPLEEN          | STOMACH          | STERNUM         | THYROIDS        |
| THYMUS     | TONGUE          | TRACHEA          | URINARY BLADDER |                 |

The following tissues have no gross observations and were marked as unremarkable microscopically:  
VAGINA

CONFIDENTIAL

Appendix 12  
Individual Animal Microscopic vs. Gross Observations

Fexinidazole

Study Number: 0505-2007

ANIMAL: 2561                      SEX: Female                      GROUP: 3                      DOSE LEVEL: 200 mg/kg/day  
DAY OF DEATH: 29 Test period                      STATUS: Scheduled phase sacrifice # 1                      TERMINAL BODY WEIGHT (kg) : 7.10

| Tissue                    | Gross observations/comments     | Correlated Microscopic Observations                                                         |
|---------------------------|---------------------------------|---------------------------------------------------------------------------------------------|
| GENER. CONDITION . . .    | GOOD                            | No micropathology observations on tissue.                                                   |
| MAMMARY GLAND . . . . .   | No gross observations on tissue | EDEMA, Minimal.<br>STROMAL PROLIFERATION, Slight.<br>DUCTAL-ALVEOLAR HYPERPLASIA, Moderate. |
| OVARIES . . . . .         | No gross observations on tissue | CORPORA LUTEA, Present.                                                                     |
| STAGE OF ESTRUS . . . . . | No gross observations on tissue | DIESTRUS, Present.                                                                          |
| UTERUS . . . . .          | No gross observations on tissue | EOSINOPHILIC SECRETORY MATERIAL IN<br>GLANDULAR LUMEN, Minimal.                             |

The following tissues have no gross observations and were not examined microscopically:

|            |                 |                  |                 |                 |
|------------|-----------------|------------------|-----------------|-----------------|
| ADRENALS   | AORTA-THORACIC  | BONE MARROW      | BRAIN           | CECUM           |
| COLON      | DIAPHRAGM       | DUODENUM         | ESOPHAGUS       | EYES            |
| FEMUR HEAD | GALL BLADDER    | HEART            | ILEUM           | JEJUNUM         |
| KIDNEYS    | LACRIMAL GLANDS | LIVER            | MANDIBULAR L.N. | MESENTERIC L.N. |
| LUNG       | SKELETAL MUSCLE | SCIATIC NERVE    | OPTIC NERVES    | PANCREAS        |
| PITUITARY  | PARATHYROIDS    | SPINAL CORD-CERV | MANDIBULAR S.G. | PAROTIDS        |
| SKIN       | SPLEEN          | STOMACH          | STERNUM         | THYROIDS        |
| THYMUS     | TONGUE          | TRACHEA          | URINARY BLADDER |                 |

The following tissues have no gross observations and were marked as unremarkable microscopically:  
VAGINA

CONFIDENTIAL

Appendix 12  
Individual Animal Microscopic vs. Gross Observations

Fexinidazole

Study Number: 0505-2007

---

|                              |                                       |                             |                           |
|------------------------------|---------------------------------------|-----------------------------|---------------------------|
| ANIMAL: 2570                 | SEX: Female                           | GROUP: 3                    | DOSE LEVEL: 200 mg/kg/day |
| DAY OF DEATH: 30 Test period | STATUS: Scheduled phase sacrifice # 1 | TERMINAL BODY WEIGHT (kg) : | 6.65                      |

---

| Tissue                    | Gross observations/comments     | Correlated Microscopic Observations                                                                                    |
|---------------------------|---------------------------------|------------------------------------------------------------------------------------------------------------------------|
| GENER. CONDITION . . .    | FAIRLY GOOD                     | No micropathology observations on tissue.                                                                              |
| MAMMARY GLAND . . . . .   | No gross observations on tissue | EDEMA, Moderate.<br>STROMAL PROLIFERATION, Moderate.<br>DUCTAL-ALVEOLAR HYPERPLASIA, Slight.                           |
| OVARIES . . . . .         | No gross observations on tissue | CORPORA LUTEA, Present.                                                                                                |
| PERITONEAL CAV. . . . .   | CLEAR LIQUID CONTENT            | No micropathology observations on tissue.                                                                              |
| STAGE OF ESTRUS . . . . . | No gross observations on tissue | DIESTRUS, Present.                                                                                                     |
| THYMUS . . . . .          | SMALL                           | Tissue is missing.<br><br>only adipose tissue detectable in the samples evaluated                                      |
| UTERUS . . . . .          | No gross observations on tissue | ENDOMETRIAL GLAND HYPERTROPHY/HYPERPLASIA, Slight.<br><br>EOSINOPHILIC SECRETORY MATERIAL IN GLANDULAR LUMEN, Minimal. |

CONFIDENTIAL

Appendix 12  
Individual Animal Microscopic vs. Gross Observations

Fexinidazole

Study Number: 0505-2007

---

|                              |                                       |                             |                           |
|------------------------------|---------------------------------------|-----------------------------|---------------------------|
| ANIMAL: 2570                 | SEX: Female                           | GROUP: 3                    | DOSE LEVEL: 200 mg/kg/day |
| DAY OF DEATH: 30 Test period | STATUS: Scheduled phase sacrifice # 1 | TERMINAL BODY WEIGHT (kg) : | 6.65                      |

---

| Tissue | Gross observations/comments | Correlated Microscopic Observations |
|--------|-----------------------------|-------------------------------------|
|--------|-----------------------------|-------------------------------------|

---

The following tissues have no gross observations and were not examined microscopically:

|            |                 |                  |                 |                 |
|------------|-----------------|------------------|-----------------|-----------------|
| ADRENALS   | AORTA-THORACIC  | BONE MARROW      | BRAIN           | CECUM           |
| COLON      | DIAPHRAGM       | DUODENUM         | ESOPHAGUS       | EYES            |
| FEMUR HEAD | GALL BLADDER    | HEART            | ILEUM           | JEJUNUM         |
| KIDNEYS    | LACRIMAL GLANDS | LIVER            | MANDIBULAR L.N. | MESENTERIC L.N. |
| LUNG       | SKELETAL MUSCLE | SCIATIC NERVE    | OPTIC NERVES    | PANCREAS        |
| PITUITARY  | PARATHYROIDS    | SPINAL CORD-CERV | MANDIBULAR S.G. | PAROTIDS        |
| SKIN       | SPLEEN          | STOMACH          | STERNUM         | THYROIDS        |
| TONGUE     | TRACHEA         | URINARY BLADDER  | VAGINA          |                 |

The following tissues have no gross observations and were marked as unremarkable microscopically:  
No tissue to list.

CONFIDENTIAL

Appendix 12  
Individual Animal Microscopic vs. Gross Observations

Fexinidazole

Study Number: 0505-2007

ANIMAL: 2567                      SEX: Female                      GROUP: 3                      DOSE LEVEL: 200 mg/kg/day  
DAY OF DEATH: 30 Test period                      STATUS: Scheduled phase sacrifice # 1                      TERMINAL BODY WEIGHT (kg) : 8.00

| Tissue                  | Gross observations/comments     | Correlated Microscopic Observations                                                       |
|-------------------------|---------------------------------|-------------------------------------------------------------------------------------------|
| GENER. CONDITION . . .  | GOOD                            | No micropathology observations on tissue.                                                 |
| MAMMARY GLAND . . . . . | No gross observations on tissue | EDEMA, Slight.<br>STROMAL PROLIFERATION, Slight.<br>DUCTAL-ALVEOLAR HYPERPLASIA, Minimal. |
| OVARIES . . . . .       | No gross observations on tissue | CORPORA LUTEA, Present.                                                                   |
| STAGE OF ESTRUS . . . . | No gross observations on tissue | DIESTRUS, Present.                                                                        |
| UTERUS . . . . .        | No gross observations on tissue | ENDOMETRIAL GLAND HYPERTROPHY/HYPERPLASIA,<br>Moderate.                                   |

The following tissues have no gross observations and were not examined microscopically:

|            |                 |                  |                 |                 |
|------------|-----------------|------------------|-----------------|-----------------|
| ADRENALS   | AORTA-THORACIC  | BONE MARROW      | BRAIN           | CECUM           |
| COLON      | DIAPHRAGM       | DUODENUM         | ESOPHAGUS       | EYES            |
| FEMUR HEAD | GALL BLADDER    | HEART            | ILEUM           | JEJUNUM         |
| KIDNEYS    | LACRIMAL GLANDS | LIVER            | MANDIBULAR L.N. | MESENTERIC L.N. |
| LUNG       | SKELETAL MUSCLE | SCIATIC NERVE    | OPTIC NERVES    | PANCREAS        |
| PITUITARY  | PARATHYROIDS    | SPINAL CORD-CERV | MANDIBULAR S.G. | PAROTIDS        |
| SKIN       | SPLEEN          | STOMACH          | STERNUM         | THYROIDS        |
| THYMUS     | TONGUE          | TRACHEA          | URINARY BLADDER | VAGINA          |

The following tissues have no gross observations and were marked as unremarkable microscopically:  
No tissue to list.

CONFIDENTIAL

Appendix 12  
Individual Animal Microscopic vs. Gross Observations

Fexinidazole

Study Number: 0505-2007

|                              |                                       |                             |                           |
|------------------------------|---------------------------------------|-----------------------------|---------------------------|
| ANIMAL: 2564                 | SEX: Female                           | GROUP: 4                    | DOSE LEVEL: 800 mg/kg/day |
| DAY OF DEATH: 29 Test period | STATUS: Scheduled phase sacrifice # 1 | TERMINAL BODY WEIGHT (kg) : | 6.10                      |

| Tissue                   | Gross observations/comments     | Correlated Microscopic Observations                                                                  |
|--------------------------|---------------------------------|------------------------------------------------------------------------------------------------------|
| AORTA-THORACIC . . . .   | No gross observations on tissue | ECTOPIC THYROID, Present.                                                                            |
| ESOPHAGUS . . . . .      | No gross observations on tissue | CHRONIC INFLAMMATION, Minimal, Focal. /<br>associated with submucosal glands                         |
| GALL BLADDER . . . . .   | No gross observations on tissue | LYMPHOCYTIC INFILTRATION, Minimal,<br>Multifocal.                                                    |
| GENER. CONDITION . . . . | GOOD                            | No micropathology observations on tissue.                                                            |
| KIDNEYS . . . . .        | No gross observations on tissue | PAPILLARY MINERALIZATION, Minimal,<br>Multifocal.                                                    |
| LIVER . . . . .          | No gross observations on tissue | CHRONIC INFLAMMATION, Minimal, Multifocal.                                                           |
| MESENTERIC L.N. . . . .  | No gross observations on tissue | SINUS ERYTHROCYTES/ERYTHROPHAGOCYTOSIS,<br>Minimal.                                                  |
| LUNG . . . . .           | No gross observations on tissue | ACUTE INFLAMMATION, Minimal, Focal.<br><br>ALVEOLAR MACROPHAGE INFILTRATION, Minimal,<br>Multifocal. |
| MAMMARY GLAND . . . . .  | No gross observations on tissue | LOBULAR HYPERPLASIA, Slight.<br><br>SECRETORY ACTIVITY, Slight.                                      |

CONFIDENTIAL

Appendix 12  
Individual Animal Microscopic vs. Gross Observations

Fexinidazole

Study Number: 0505-2007

ANIMAL: 2564                      SEX: Female                      GROUP: 4                      DOSE LEVEL: 800 mg/kg/day  
DAY OF DEATH: 29 Test period                      STATUS: Scheduled phase sacrifice # 1                      TERMINAL BODY WEIGHT (kg) : 6.10

| Tissue                    | Gross observations/comments     | Correlated Microscopic Observations                                  |
|---------------------------|---------------------------------|----------------------------------------------------------------------|
| OVARIES . . . . .         | No gross observations on tissue | CORPORA LUTEA, Present.                                              |
| PARATHYROIDS . . . . .    | No gross observations on tissue | ONLY ONE PARATHYROID AVAILABLE FOR EXAMINATION, Present.             |
| STAGE OF ESTRUS . . . . . | No gross observations on tissue | DIESTRUS, Present.                                                   |
| MANDIBULAR S.G. . . . .   | No gross observations on tissue | LYMPHOCYTIC INFILTRATION, Slight, Focal, Unilateral..                |
| THYMUS . . . . .          | No gross observations on tissue | INVOLUTION, Marked.                                                  |
| UTERUS . . . . .          | No gross observations on tissue | EOSINOPHILIC SECRETORY MATERIAL IN GLANDULAR LUMEN, Slight, Diffuse. |

The following tissues have no gross observations and were not examined microscopically:  
No tissue to list.

The following tissues have no gross observations and were marked as unremarkable microscopically:

|               |              |                 |                 |                  |
|---------------|--------------|-----------------|-----------------|------------------|
| ADRENALS      | BONE MARROW  | BRAIN           | CECUM           | COLON            |
| DIAPHRAGM     | DUODENUM     | EYES            | FEMUR HEAD      | HEART            |
| ILEUM         | JEJUNUM      | LACRIMAL GLANDS | MANDIBULAR L.N. | SKELETAL MUSCLE  |
| SCIATIC NERVE | OPTIC NERVES | PANCREAS        | PITUITARY       | SPINAL CORD-CERV |
| PAROTIDS      | SKIN         | SPLEEN          | STOMACH         | STERNUM          |
| THYROIDS      | TONGUE       | TRACHEA         | URINARY BLADDER | VAGINA           |

CONFIDENTIAL

Appendix 12  
Individual Animal Microscopic vs. Gross Observations

Fexinidazole

Study Number: 0505-2007

---

|                              |                                       |                             |                           |
|------------------------------|---------------------------------------|-----------------------------|---------------------------|
| ANIMAL: 2565                 | SEX: Female                           | GROUP: 4                    | DOSE LEVEL: 800 mg/kg/day |
| DAY OF DEATH: 30 Test period | STATUS: Scheduled phase sacrifice # 1 | TERMINAL BODY WEIGHT (kg) : | 6.11                      |

---

| Tissue                     | Gross observations/comments     | Correlated Microscopic Observations                                                                                |
|----------------------------|---------------------------------|--------------------------------------------------------------------------------------------------------------------|
| DUODENUM . . . . .         | No gross observations on tissue | CRYPT DILATATION WITH/WITHOUT LUMENAL<br>NECROTIC DEBRIS, Minimal, Focal.                                          |
| GALL BLADDER . . . . .     | No gross observations on tissue | LYMPHOCYTIC INFILTRATION, Minimal,<br>Multifocal.                                                                  |
| GENER. CONDITION . . . . . | GOOD                            | No micropathology observations on tissue.                                                                          |
| HEART . . . . .            | No gross observations on tissue | MESOTHELIAL HYPERPLASIA, ATRIAL, Slight,<br>Multifocal, Unilateral right..                                         |
| KIDNEYS . . . . .          | No gross observations on tissue | PAPILLARY MINERALIZATION, Minimal,<br>Multifocal.                                                                  |
| LIVER . . . . .            | No gross observations on tissue | CHRONIC INFLAMMATION, Minimal, Multifocal.                                                                         |
| LUNG . . . . .             | No gross observations on tissue | ALVEOLAR MACROPHAGE INFILTRATION, Slight,<br>Multifocal.<br><br>BRONCHOPNEUMONIA, Slight, Multifocal,<br>Subacute. |
| MAMMARY GLAND . . . . .    | No gross observations on tissue | EDEMA, Slight.<br><br>STROMAL PROLIFERATION, Slight.<br><br>DUCTAL-ALVEOLAR HYPERPLASIA, Slight.                   |



CONFIDENTIAL

Appendix 12  
Individual Animal Microscopic vs. Gross Observations

Fexinidazole

Study Number: 0505-2007

ANIMAL: 2565                      SEX: Female                      GROUP: 4                      DOSE LEVEL: 800 mg/kg/day  
DAY OF DEATH: 30 Test period                      STATUS: Scheduled phase sacrifice # 1                      TERMINAL BODY WEIGHT (kg) : 6.11

| Tissue                    | Gross observations/comments     | Correlated Microscopic Observations                                                                         |
|---------------------------|---------------------------------|-------------------------------------------------------------------------------------------------------------|
| OVARIES . . . . .         | No gross observations on tissue | CORPORA LUTEA, Present.                                                                                     |
| PARATHYROIDS . . . . .    | No gross observations on tissue | ONLY ONE PARATHYROID AVAILABLE FOR EXAMINATION, Present.<br><br>CYSTS, Minimal, Focal. / in adjacent tissue |
| STAGE OF ESTRUS . . . . . | No gross observations on tissue | DIESTRUS, Present.                                                                                          |
| PAROTIDS . . . . .        | No gross observations on tissue | LYMPHOCYTIC INFILTRATION, Minimal, Multifocal.                                                              |
| THYMUS . . . . .          | No gross observations on tissue | INVOLUTION, Marked.                                                                                         |
| UTERUS . . . . .          | No gross observations on tissue | ENDOMETRIAL GLAND HYPERTROPHY/HYPERPLASIA, Moderate, Diffuse.                                               |

The following tissues have no gross observations and were not examined microscopically:

URINARY BLADDER

The following tissues have no gross observations and were marked as unremarkable microscopically:

|                  |                 |                 |                 |                 |
|------------------|-----------------|-----------------|-----------------|-----------------|
| ADRENALS         | AORTA-THORACIC  | BONE MARROW     | BRAIN           | CECUM           |
| COLON            | DIAPHRAGM       | ESOPHAGUS       | EYES            | FEMUR HEAD      |
| ILEUM            | JEJUNUM         | LACRIMAL GLANDS | MANDIBULAR L.N. | MESENTERIC L.N. |
| SKELETAL MUSCLE  | SCIATIC NERVE   | OPTIC NERVES    | PANCREAS        | PITUITARY       |
| SPINAL CORD-CERV | MANDIBULAR S.G. | SKIN            | SPLEEN          | STOMACH         |
| STERNUM          | THYROIDS        | TONGUE          | TRACHEA         | VAGINA          |

CONFIDENTIAL

Appendix 12  
Individual Animal Microscopic vs. Gross Observations

Fexinidazole

Study Number: 0505-2007

|                              |                                       |                             |                           |
|------------------------------|---------------------------------------|-----------------------------|---------------------------|
| ANIMAL: 2569                 | SEX: Female                           | GROUP: 4                    | DOSE LEVEL: 800 mg/kg/day |
| DAY OF DEATH: 30 Test period | STATUS: Scheduled phase sacrifice # 1 | TERMINAL BODY WEIGHT (kg) : | 7.65                      |

| Tissue                     | Gross observations/comments     | Correlated Microscopic Observations                                                               |
|----------------------------|---------------------------------|---------------------------------------------------------------------------------------------------|
| DUODENUM . . . . .         | No gross observations on tissue | CRYPT DILATATION WITH/WITHOUT LUMENAL<br>NECROTIC DEBRIS, Minimal, Focal.                         |
| GALL BLADDER . . . . .     | No gross observations on tissue | LYMPHOCYTIC INFILTRATION, Slight,<br>Multifocal.                                                  |
| GENER. CONDITION . . . . . | GOOD                            | No micropathology observations on tissue.                                                         |
| HEART . . . . .            | No gross observations on tissue | ARTERIAL MEDIAL HYPERTROPHY, Minimal,<br>Focal, Unilateral right.. / in the atrium                |
| LACRIMAL GLANDS . . . . .  | No gross observations on tissue | ONLY ONE GLAND AVAILABLE FOR EXAMINATION,<br>Present.                                             |
| LIVER . . . . .            | No gross observations on tissue | CHRONIC INFLAMMATION, Minimal, Multifocal.                                                        |
| MESENTERIC L.N. . . . .    | No gross observations on tissue | SINUS ERYTHROCYTES/ERYTHROPHAGOCYTOSIS,<br>Minimal.                                               |
| LUNG . . . . .             | No gross observations on tissue | ALVEOLAR MACROPHAGE INFILTRATION, Minimal,<br>Multifocal.                                         |
| MAMMARY GLAND . . . . .    | No gross observations on tissue | EDEMA, Slight.<br><br>STROMAL PROLIFERATION, Slight.<br><br>DUCTAL-ALVEOLAR HYPERPLASIA, Minimal. |

CONFIDENTIAL

Appendix 12  
Individual Animal Microscopic vs. Gross Observations

Fexinidazole

Study Number: 0505-2007

ANIMAL: 2569                      SEX: Female                      GROUP: 4                      DOSE LEVEL: 800 mg/kg/day  
DAY OF DEATH: 30 Test period                      STATUS: Scheduled phase sacrifice # 1                      TERMINAL BODY WEIGHT (kg) : 7.65

| Tissue                    | Gross observations/comments     | Correlated Microscopic Observations                         |
|---------------------------|---------------------------------|-------------------------------------------------------------|
| OVARIES . . . . .         | No gross observations on tissue | CORPORA LUTEA, Present.                                     |
| PARATHYROIDS . . . . .    | No gross observations on tissue | ONLY ONE PARATHYROID AVAILABLE FOR EXAMINATION, Present.    |
| STAGE OF ESTRUS . . . . . | No gross observations on tissue | METESTRUS, Present.                                         |
| THYMUS . . . . .          | No gross observations on tissue | CYSTS, Slight, Multifocal.<br><br>INVOLUTION, Marked.       |
| UTERUS . . . . .          | No gross observations on tissue | ENDOMETRIAL GLAND HYPERTROPHY/HYPERPLASIA, Slight, Diffuse. |

The following tissues have no gross observations and were not examined microscopically:  
No tissue to list.

The following tissues have no gross observations and were marked as unremarkable microscopically:

|                 |                |             |                 |                  |
|-----------------|----------------|-------------|-----------------|------------------|
| ADRENALS        | AORTA-THORACIC | BONE MARROW | BRAIN           | CECUM            |
| COLON           | DIAPHRAGM      | ESOPHAGUS   | EYES            | FEMUR HEAD       |
| ILEUM           | JEJUNUM        | KIDNEYS     | MANDIBULAR L.N. | SKELETAL MUSCLE  |
| SCIATIC NERVE   | OPTIC NERVES   | PANCREAS    | PITUITARY       | SPINAL CORD-CERV |
| MANDIBULAR S.G. | PAROTIDS       | SKIN        | SPLEEN          | STOMACH          |
| STERNUM         | THYROIDS       | TONGUE      | TRACHEA         | URINARY BLADDER  |
| VAGINA          |                |             |                 |                  |

CONFIDENTIAL

Appendix 12  
Individual Animal Microscopic vs. Gross Observations

Fexinidazole

Study Number: 0505-2007

|                              |                               |                             |                           |
|------------------------------|-------------------------------|-----------------------------|---------------------------|
| ANIMAL: 2571                 | SEX: Female                   | GROUP: 4                    | DOSE LEVEL: 800 mg/kg/day |
| DAY OF DEATH: 43 Test period | STATUS: Final phase sacrifice | TERMINAL BODY WEIGHT (kg) : | 7.32                      |

| Tissue                    | Gross observations/comments     | Correlated Microscopic Observations                                                          |
|---------------------------|---------------------------------|----------------------------------------------------------------------------------------------|
| GENER. CONDITION . . .    | GOOD                            | No micropathology observations on tissue.                                                    |
| HEART . . . . .           | No gross observations on tissue | MESOTHELIAL HYPERPLASIA, ATRIAL, Minimal, Focal, Unilateral left..                           |
| KIDNEYS . . . . .         | No gross observations on tissue | PAPILLARY MINERALIZATION, Minimal, Multifocal.                                               |
| MESENTERIC L.N. . . . .   | No gross observations on tissue | SINUS ERYTHROCYTES/ERYTHROPHAGOCYTOSIS, Minimal.                                             |
| MAMMARY GLAND . . . . .   | No gross observations on tissue | EDEMA, Slight.<br>STROMAL PROLIFERATION, Moderate.<br>DUCTAL-ALVEOLAR HYPERPLASIA, Moderate. |
| SKELETAL MUSCLE . . . . . | No gross observations on tissue | CHRONIC INFLAMMATION, Minimal, Focal.                                                        |
| OVARIES . . . . .         | No gross observations on tissue | CORPORA LUTEA, Present.                                                                      |
| PANCREAS . . . . .        | No gross observations on tissue | ACINAR APOPTOSIS, Minimal, Multifocal.                                                       |
| PARATHYROIDS . . . . .    | No gross observations on tissue | ONLY ONE PARATHYROID AVAILABLE FOR EXAMINATION, Present.                                     |

CONFIDENTIAL

Appendix 12  
Individual Animal Microscopic vs. Gross Observations

Fexinidazole

Study Number: 0505-2007

ANIMAL: 2571                      SEX: Female                      GROUP: 4                      DOSE LEVEL: 800 mg/kg/day  
DAY OF DEATH: 43 Test period                      STATUS: Final phase sacrifice                      TERMINAL BODY WEIGHT (kg) : 7.32

| Tissue                  | Gross observations/comments     | Correlated Microscopic Observations                                                                                                          |
|-------------------------|---------------------------------|----------------------------------------------------------------------------------------------------------------------------------------------|
| STAGE OF ESTRUS . . . . | No gross observations on tissue | DIESTRUS, Present.                                                                                                                           |
| MANDIBULAR S.G. . . . . | No gross observations on tissue | LYMPHOCYTIC INFILTRATION, Slight, Focal, Unilateral..                                                                                        |
| SPLEEN . . . . .        | No gross observations on tissue | EXTRAMEDULLARY HEMATOPOIESIS, Minimal.                                                                                                       |
| STOMACH . . . . .       | No gross observations on tissue | ACUTE INFLAMMATION, Minimal, Multifocal. / in the pyloric region                                                                             |
| THYMUS . . . . .        | No gross observations on tissue | INVOLUTION, Minimal.                                                                                                                         |
| UTERUS . . . . .        | No gross observations on tissue | ENDOMETRIAL GLAND HYPERTROPHY/HYPERPLASIA, Minimal, Diffuse.<br><br>EOSINOPHILIC SECRETORY MATERIAL IN GLANDULAR LUMEN, Minimal, Multifocal. |

The following tissues have no gross observations and were not examined microscopically:  
No tissue to list.

The following tissues have no gross observations and were marked as unremarkable microscopically:

|            |                  |             |                 |                 |
|------------|------------------|-------------|-----------------|-----------------|
| ADRENALS   | AORTA-THORACIC   | BONE MARROW | BRAIN           | CECUM           |
| COLON      | DIAPHRAGM        | DUODENUM    | ESOPHAGUS       | EYES            |
| FEMUR HEAD | GALL BLADDER     | ILEUM       | JEJUNUM         | LACRIMAL GLANDS |
| LIVER      | MANDIBULAR L.N.  | LUNG        | SCIATIC NERVE   | OPTIC NERVES    |
| PITUITARY  | SPINAL CORD-CERV | PAROTIDS    | SKIN            | STERNUM         |
| THYROIDS   | TONGUE           | TRACHEA     | URINARY BLADDER | VAGINA          |

CONFIDENTIAL

Appendix 12  
Individual Animal Microscopic vs. Gross Observations

Fexinidazole

Study Number: 0505-2007

---

|                              |                               |                             |                           |
|------------------------------|-------------------------------|-----------------------------|---------------------------|
| ANIMAL: 2573                 | SEX: Female                   | GROUP: 4                    | DOSE LEVEL: 800 mg/kg/day |
| DAY OF DEATH: 43 Test period | STATUS: Final phase sacrifice | TERMINAL BODY WEIGHT (kg) : | 6.83                      |

---

| Tissue                     | Gross observations/comments     | Correlated Microscopic Observations                                                                           |
|----------------------------|---------------------------------|---------------------------------------------------------------------------------------------------------------|
| DUODENUM . . . . .         | No gross observations on tissue | ECTOPIC PANCREATIC TISSUE IN SUBMUCOSA, Present.                                                              |
| GALL BLADDER . . . . .     | No gross observations on tissue | LYMPHOCYTIC INFILTRATION, Minimal, Multifocal.                                                                |
| GENER. CONDITION . . . . . | GOOD                            | No micropathology observations on tissue.                                                                     |
| KIDNEYS . . . . .          | No gross observations on tissue | CHRONIC INFLAMMATION, Minimal, Focal, Unilateral left..<br><br>PAPILLARY MINERALIZATION, Minimal, Multifocal. |
| MESENTERIC L.N. . . . .    | No gross observations on tissue | SINUS ERYTHROCYTES/ERYTHROPHAGOCYTOSIS, Minimal.                                                              |
| LUNG . . . . .             | No gross observations on tissue | ALVEOLAR MACROPHAGE INFILTRATION, Minimal, Multifocal.                                                        |
| MAMMARY GLAND . . . . .    | No gross observations on tissue | EDEMA, Moderate.<br><br>STROMAL PROLIFERATION, Moderate.<br><br>DUCTAL-ALVEOLAR HYPERPLASIA, Moderate.        |
| OVARIES . . . . .          | No gross observations on tissue | CORPORA LUTEA, Present.<br><br>CYSTS, Slight, Focal, Unilateral..                                             |

CONFIDENTIAL

Appendix 12  
Individual Animal Microscopic vs. Gross Observations

Fexinidazole

Study Number: 0505-2007

ANIMAL: 2573                      SEX: Female                      GROUP: 4                      DOSE LEVEL: 800 mg/kg/day  
DAY OF DEATH: 43 Test period                      STATUS: Final phase sacrifice                      TERMINAL BODY WEIGHT (kg) : 6.83

| Tissue                    | Gross observations/comments     | Correlated Microscopic Observations                                                                                                      |
|---------------------------|---------------------------------|------------------------------------------------------------------------------------------------------------------------------------------|
| PITUITARY . . . . .       | No gross observations on tissue | CRANIOPHARINGEAL CYSTS, Moderate, Focal.                                                                                                 |
| PARATHYROIDS . . . . .    | No gross observations on tissue | ONLY ONE PARATHYROID AVAILABLE FOR EXAMINATION, Present.                                                                                 |
| STAGE OF ESTRUS . . . . . | No gross observations on tissue | DIESTRUS, Present.                                                                                                                       |
| PAROTIDS . . . . .        | No gross observations on tissue | ACINAR ATROPHY, Minimal, Focal.                                                                                                          |
| STOMACH . . . . .         | No gross observations on tissue | ACUTE INFLAMMATION, Minimal, Multifocal. / in the pyloric region                                                                         |
| THYMUS . . . . .          | No gross observations on tissue | CYSTS, Minimal, Multifocal.<br>INVOLUTION, Moderate.                                                                                     |
| UTERUS . . . . .          | No gross observations on tissue | ENDOMETRIAL GLAND HYPERTROPHY/HYPERPLASIA, Minimal, Diffuse.<br>EOSINOPHILIC SECRETORY MATERIAL IN GLANDULAR LUMEN, Minimal, Multifocal. |

The following tissues have no gross observations and were not examined microscopically:  
No tissue to list.

The following tissues have no gross observations and were marked as unremarkable microscopically:  
ADRENALS                      AORTA-THORACIC                      BONE MARROW                      BRAIN                      CECUM

CONFIDENTIAL

Appendix 12  
Individual Animal Microscopic vs. Gross Observations

Fexinidazole

Study Number: 0505-2007

---

|                              |                               |                             |                           |
|------------------------------|-------------------------------|-----------------------------|---------------------------|
| ANIMAL: 2573                 | SEX: Female                   | GROUP: 4                    | DOSE LEVEL: 800 mg/kg/day |
| DAY OF DEATH: 43 Test period | STATUS: Final phase sacrifice | TERMINAL BODY WEIGHT (kg) : | 6.83                      |

---

| Tissue | Gross observations/comments | Correlated Microscopic Observations |
|--------|-----------------------------|-------------------------------------|
|--------|-----------------------------|-------------------------------------|

---

The following tissues have no gross observations and were marked as unremarkable microscopically:

|                  |                 |               |                 |            |
|------------------|-----------------|---------------|-----------------|------------|
| COLON            | DIAPHRAGM       | ESOPHAGUS     | EYES            | FEMUR HEAD |
| HEART            | ILEUM           | JEJUNUM       | LACRIMAL GLANDS | LIVER      |
| MANDIBULAR L.N.  | SKELETAL MUSCLE | SCIATIC NERVE | OPTIC NERVES    | PANCREAS   |
| SPINAL CORD-CERV | MANDIBULAR S.G. | SKIN          | SPLEEN          | STERNUM    |
| THYROIDS         | TONGUE          | TRACHEA       | URINARY BLADDER | VAGINA     |



## ***Appendix 13 Toxicokinetic Report***

## **TOXICOKINETIC REPORT FOR THE STUDY**

### **Fexinidazole: 28-day Oral Toxicity Study in the Dog**

Nerviano Medical Sciences Study Number: 0505-2007

Study Director:

Status

Final

**TABLE OF CONTENTS**

1. INTRODUCTION AND OBJECTIVE .....3

2. STUDY SPONSOR .....3

3. TEST FACILITY .....3

4. REGULATORY REQUIREMENTS .....3

5. ABBREVIATIONS .....3

6. METHODS .....4

    6.1. Study Design .....4

    6.2. Sample Information .....4

    6.3. Bioanalytical Method .....5

    6.4. Pharmacokinetic Calculations .....5

7. RESULTS .....5

    7.1. Tables and Figures .....5

    7.2. Pharmacokinetic Results .....6

8. CONCLUSIONS .....9

9. CONTRIBUTORS .....9

10. ARCHIVING .....9

11. REFERENCES .....9

TABLES AND FIGURES .....10

APPENDICES

    Appendix 1. Individual plasma concentrations .....59

    Appendix 2. In-Study Bioanalytical Validation Data .....81

## 1. INTRODUCTION AND OBJECTIVE

Fexinidazole is a 5-nitroimidazole derivate, biologically active against Trypanosoma parasites (*T.b.rhodesiense* and *T.b. brucei*) and useful in the treatment of the Human African trypanosomiasis (HAT), known as sleeping sickness.

As part of a GLP toxicity study, the toxicokinetics of Fexinidazole and its sulfone and sulfoxide metabolites were evaluated after the first and repeated oral administrations of Fexinidazole to male and female Beagle dogs.

## 2. STUDY SPONSOR

DNDi – Drugs for Neglected Diseases *Initiative*  
1 Place St Gervais  
CH - 1201 Geneva, Switzerland.

## 3. TEST FACILITY

Accelera

## 4. REGULATORY REQUIREMENTS

This study was conducted in compliance with

- Decreto Legislativo 2 Marzo 2007, No. 50;
- Organization for Economic Co-operation and Development (OECD) Principles of Good Laboratory Practice (GLP) (as revised in 1997).

The methods employed in this study were those described in the "Standard Operating Procedures" of the laboratories involved.

## 5. ABBREVIATIONS

The following abbreviations are used in this document:

|                          |                                                                               |
|--------------------------|-------------------------------------------------------------------------------|
| AUC <sub>0-24</sub>      | Area under the plasma concentration vs. time curve up to 24 hours post dosing |
| AUC <sub>0-t(last)</sub> | Area under the plasma concentration vs. time curve up to finite time          |
| C <sub>max</sub>         | Maximal plasma concentration                                                  |
| CV                       | Coefficient of variation of the mean                                          |
| F                        | Female                                                                        |
| ID                       | Animal identification code                                                    |
| LC                       | Liquid chromatography                                                         |

|                    |                                   |
|--------------------|-----------------------------------|
| LLOQ               | Lower limit of quantification     |
| M                  | Male                              |
| MS                 | Mass-spectrometry                 |
| QC                 | Quality control sample            |
| R <sup>2</sup>     | Correlation coefficient           |
| RA                 | Accumulation ratio                |
| SD                 | Standard deviation of the mean    |
| STD                | Standard sample                   |
| t <sub>1/2,z</sub> | Terminal half-life                |
| t <sub>max</sub>   | Time to peak plasma concentration |
| ULOQ               | Upper limit of quantification     |

## 6. METHODS

### 6.1. Study Design

The study was conducted according to the study protocol and related amendment [1,2]. Fexinidazole was orally given by gavage once a day for 28 days to male and female Beagle dogs according to the following scheme

| Dose<br>(mg/kg/day) | Volume<br>(mL/kg/day) | Dog ID                                                           |
|---------------------|-----------------------|------------------------------------------------------------------|
| 0                   | 10                    | M: 2516, 2518, 2520, 2527, 2533; F: 2560, 2568, 2572, 2575, 2577 |
| 50                  | 10                    | M: 2514, 2521, 2529; F: 2562, 2563, 2576                         |
| 200                 | 10                    | M: 2515, 2523, 2526; F: 2561, 2567, 2570                         |
| 800                 | 10                    | M: 2517, 2519, 2525, 2528, 2530; F: 2564, 2565, 2569, 2571, 2573 |

Fexinidazole was suspended with 5% Tween 80 in 0.5% Methyl cellulose 400 cP.

### 6.2. Sample Information

Blood samples (about 1 mL/sampling time) were withdrawn from peripheral veins and put in heparinized plastic tubes kept on a ice-water bath, then centrifuged for 10 min at 1200g at +4°C and two aliquots of about 200 µL of plasma were stored in a freezer at -80°C until analysis. Blood was taken on Days 1, 14 from three dogs/gender/dose at pre-dose and 0.5, 1, 2, 4, 8 and 24 hours post dosing; on Day 28, blood was taken from three dogs/gender after 50 and 200 mg/kg/day at pre-dose and 0.5, 1, 2, 4, 8 and 24 hours post dosing and from five dogs/gender after 800 mg/kg/day at pre-dose and 1, 2, 4, 8, 24, 48 (recovery animals, [n=2]) and 72 (recovery animals, [n=2]) hours post dosing. After the administration of the vehicle, the samples were taken from five dogs/gender at all timepoints.

### 6.3. Bioanalytical Method

Dog plasma concentrations of Fexinidazole and its sulfoxide (M1) and sulfone (M2) metabolites were determined by a validated LC/MS/MS method [3,4]. The calibration range for the assay was 5-1000 ng/mL for Fexinidazole and 25-25000 ng/mL for M1 and M2. Study samples containing analytes concentrations above the upper limit of quantification were diluted with blank matrix prior to analysis.

### 6.4. Pharmacokinetic Calculations

Pharmacokinetic calculations were performed using a non-compartmental approach with the aid of Watson package (v. 6.4.0.04, Thermo Fisher Scientific, Waltham, MA, USA) and Excel spreadsheet (Microsoft Inc., Seattle, USA).

In the calculations, the undetectable concentrations between detectable ones were ignored.

After each dose level,  $C_{max}$  and  $t_{max}$  of Fexinidazole and sulfone and sulfoxide metabolites were read from raw data as the coordinates of the highest measured concentration. The area under plasma concentration vs. time curve up to finite time,  $AUC_{0-t(last)}$ , was determined for each compound by the linear trapezoidal rule up to the last detectable concentration. On Day 28, since the blood sampling was performed up to 72 hours post dosing, in addition to  $AUC_{0-t(last)}$ ,  $AUC_{0-24}$  of both metabolites were calculated. The  $AUC_{0-24}$  was calculated in order to compare AUC values after Day 28 to those after Day 1 and Day 14.

On Day 28, in the two animals underwent recovery, the half-life of the terminal phase,  $t_{1/2,z}$ , was determined by linear regression analysis of the natural-log concentration vs. time curve, where  $t_{1/2,z} = \ln(2)/\text{slope}$  of the regression line.

After each dose,  $C_{max}$  and AUC values of each compound were also normalized to 1 mg/kg/day dose level.

Fexinidazole and metabolites accumulation ratios, based on  $C_{max}$  and  $AUC_{0-t(last)}$  ( $AUC_{0-24}$  for Day 28 sulfone and male sulfoxide data) were calculated as the ratio between the parameters obtained on Day 14 and Day 28 to the corresponding one on Day 1.

Descriptive statistics (mean  $\pm$  SD, %CV) were reported for plasma concentrations and pharmacokinetic parameters of each compound sorted by dose, gender and day of administration.

Plasma concentrations and pharmacokinetic parameters of Fexinidazole and both metabolites were reported to three significant figures.

## 7. RESULTS

### 7.1. Tables and Figures

Mean  $C_{max}$ ,  $t_{max}$  and  $AUC_{0-t(last)}$  parameters of each compound are reported in Tables 1 - 3, whilst individual and mean parameters of each compound are reported in Tables 4 - 57. Individual and mean ( $\pm$ SD, CV%) plasma concentrations of Fexinidazole and metabolites

are reported in Tables 1A1 - 21A1 of Appendix 1. Individual plasma concentrations of Fexinidazole and both metabolites are plot in Figures 1 - 15, whilst the mean concentrations are plot in Figures 16 - 21. Mean normalized  $C_{max}$  and  $AUC_{0-t(last)}$  values of Fexinidazole and metabolites vs. dose are plot in Figures 22 - 27.

In-study bioanalytical validation data are reported in Appendix 2. All analytical batches met acceptance criteria as described in PCD-M-BPK-001-01 SOP [5]. Bioanalytical data are stored in Watson LIMS (v. 6.4.0.04, Thermo Fisher Scientific, Waltham, MA, USA) under Project ID: 348-Fexinidazole and Study ID 0505-2007. Certificates of analysis are reported in Appendix 3.

## 7.2. Pharmacokinetic Results

Control plasma samples were analysed only at pre-dose and 2 hours post dosing. No detectable concentration of each compound was measured in the control samples.

### Day 1

Mean  $\pm$ SD systemic exposure to Fexinidazole is reported in the following table

| Dose<br>mg/kg | Male               |                   |                                 | Female             |                   |                                 |
|---------------|--------------------|-------------------|---------------------------------|--------------------|-------------------|---------------------------------|
|               | $C_{max}$<br>ng/mL | $t_{max}$<br>hour | $AUC_{0-t(last)}$<br>ng-hour/mL | $C_{max}$<br>ng/mL | $t_{max}$<br>hour | $AUC_{0-t(last)}$<br>ng-hour/mL |
| 50 (n=3)      | 31.2 $\pm$ 12.4    | 0.5 $\pm$ 0       | 140 $\pm$ 147                   | 42.4 $\pm$ 10.6    | 1 $\pm$ 0.87      | 237 $\pm$ 105                   |
| 200 (n=3)     | 54.9 $\pm$ 10.8    | 1 $\pm$ 0.87      | 419 $\pm$ 61.4                  | 84.1 $\pm$ 36.7    | 1 $\pm$ 0         | 454 $\pm$ 119                   |
| 800 (n=5)     | 100 $\pm$ 21.2     | 1.1 $\pm$ 0.55    | 776 $\pm$ 182                   | 184 $\pm$ 75.6     | 1.2 $\pm$ 0.45    | 895 $\pm$ 437                   |

At each dose, no relevant gender difference was observed in terms of both  $C_{max}$  and  $AUC_{0-t(last)}$  values. The maximal plasma concentrations of Fexinidazole were promptly achieved, on average at 1 hour post dosing.  $AUC_{0-t(last)}$  values of Fexinidazole increased with the dose (Figures 22 - 23).

Mean  $\pm$ SD systemic exposure to the sulfone metabolite is reported in the following table

| Dose<br>mg/kg | Male                    |                   |                                      | Female                  |                   |                                      |
|---------------|-------------------------|-------------------|--------------------------------------|-------------------------|-------------------|--------------------------------------|
|               | $C_{max}$<br>$\mu$ g/mL | $t_{max}$<br>Hour | $AUC_{0-t(last)}$<br>$\mu$ g-hour/mL | $C_{max}$<br>$\mu$ g/mL | $t_{max}$<br>hour | $AUC_{0-t(last)}$<br>$\mu$ g-hour/mL |
| 50 (n=3)      | 7.17 $\pm$ 1.74         | 8 $\pm$ 0         | 126 $\pm$ 28.1                       | 10 $\pm$ 1.6            | 6.67 $\pm$ 2.31   | 170 $\pm$ 37.8                       |
| 200 (n=3)     | 17.2 $\pm$ 1.69         | 13.3 $\pm$ 9.24   | 338 $\pm$ 50.8                       | 18.1 $\pm$ 3.42         | 12 $\pm$ 10.6     | 358 $\pm$ 85.7                       |
| 800 (n=5)     | 38.6 $\pm$ 2.83         | 17.6 $\pm$ 8.76   | 705 $\pm$ 94.9                       | 33.6 $\pm$ 10.9         | 11.2 $\pm$ 7.16   | 614 $\pm$ 216                        |

At each dose, the levels of the metabolite were similar in males and females.  $T_{max}$  values of the metabolite were achieved later than the corresponding ones of the parent compound. The systemic exposure to the metabolite increased with the dose (Figures 24 - 25). The systemic exposure to the sulfone metabolite was definitely higher than that to the parent compound.

Mean  $\pm$ SD systemic exposure to the sulfoxide metabolite is reported in the following table

| Dose<br>mg/kg | Male                           |                          |                                             | Female                         |                          |                                             |
|---------------|--------------------------------|--------------------------|---------------------------------------------|--------------------------------|--------------------------|---------------------------------------------|
|               | C <sub>max</sub><br>$\mu$ g/mL | t <sub>max</sub><br>hour | AUC <sub>0-t(last)</sub><br>$\mu$ g·hour/mL | C <sub>max</sub><br>$\mu$ g/mL | t <sub>max</sub><br>hour | AUC <sub>0-t(last)</sub><br>$\mu$ g·hour/mL |
| 50 (n=3)      | 3.55 $\pm$ 1.3                 | 1 $\pm$ 0                | 19.2 $\pm$ 5.82                             | 3.97 $\pm$ 0.74                | 1.33 $\pm$ 0.58          | 20 $\pm$ 6.81                               |
| 200 (n=3)     | 7.55 $\pm$ 1.03                | 1.67 $\pm$ 0.58          | 50.7 $\pm$ 8.61                             | 8.7 $\pm$ 3.95                 | 0.83 $\pm$ 0.29          | 52.1 $\pm$ 20.6                             |
| 800 (n=5)     | 13.4 $\pm$ 3.22                | 1.5 $\pm$ 0.71           | 104 $\pm$ 11.3                              | 15.6 $\pm$ 4.64                | 1.6 $\pm$ 0.55           | 121 $\pm$ 44.4                              |

At each dose, the levels of the metabolite were similar in males and females. The maximal plasma concentrations of the sulfoxide metabolite were rapidly achieved, on average 1 - 2 hours post dosing.

The systemic exposure to the metabolite increased with the dose (Figures 26 - 27).

The systemic exposure to the metabolite was definitely higher than that to the parent compound.

#### Repeated dosing

Day 14 and Day 28 mean  $\pm$ SD systemic exposure to Fexinidazole is reported in the following table

| Dose<br>mg/kg/day | Male                      |                          |                                        | Female                    |                          |                                        |
|-------------------|---------------------------|--------------------------|----------------------------------------|---------------------------|--------------------------|----------------------------------------|
|                   | C <sub>max</sub><br>ng/mL | t <sub>max</sub><br>hour | AUC <sub>0-t(last)</sub><br>ng·hour/mL | C <sub>max</sub><br>ng/mL | t <sub>max</sub><br>hour | AUC <sub>0-t(last)</sub><br>ng·hour/mL |
| Day 14            |                           |                          |                                        |                           |                          |                                        |
| 50 (n=3)          | 26.5 $\pm$ 13             | 0.5 $\pm$ 0              | 52.1 $\pm$ 29.4                        | 41.9 $\pm$ 2.2            | 1.67 $\pm$ 0.58          | 246 $\pm$ 117                          |
| 200 (n=3)         | 78.1 $\pm$ 23.5           | 1 $\pm$ 0.87             | 452 $\pm$ 41.1                         | 77.7 $\pm$ 50.8           | 2 $\pm$ 0                | 443 $\pm$ 217                          |
| 800 (n=5)         | 128 $\pm$ 56.9            | 1 $\pm$ 0                | 929 $\pm$ 268                          | 152 $\pm$ 44              | 1.4 $\pm$ 0.55           | 1170 $\pm$ 309                         |
| Day 28            |                           |                          |                                        |                           |                          |                                        |
| 50 (n=3)          | 20.3 $\pm$ 7.89           | 1 $\pm$ 0                | 124 $\pm$ 67                           | 36.3 $\pm$ 15.1           | 1 $\pm$ 0                | 87.1 $\pm$ 38.1                        |
| 200 (n=3)         | 57.9 $\pm$ 12.5           | 1 $\pm$ 0                | 395 $\pm$ 15.8                         | 73 $\pm$ 12               | 1 $\pm$ 0                | 377 $\pm$ 83.5                         |
| 800 (n=5)         | 86.2 $\pm$ 38.5           | 1.2 $\pm$ 0.4            | 736 $\pm$ 141                          | 101 $\pm$ 47.1            | 1 $\pm$ 0                | 956 $\pm$ 378                          |

At each dose, the levels of Fexinidazole were similar in both genders after Day 14 and Day 28 administrations. The maximal plasma concentrations of Fexinidazole were achieved, on average, 1 - 2 hours post dosing. The systemic exposure to Fexinidazole increased with the dose (Figures 22 - 23). C<sub>max</sub> and AUC<sub>0-t(last)</sub> accumulation ratios were about 1.

Day 14 and Day 28 mean  $\pm$ SD systemic exposure to the sulfone metabolite is reported in the following table

| Dose<br>mg/kg/day | Male                           |                          |                                             | Female                         |                          |                                             |
|-------------------|--------------------------------|--------------------------|---------------------------------------------|--------------------------------|--------------------------|---------------------------------------------|
|                   | C <sub>max</sub><br>$\mu$ g/mL | t <sub>max</sub><br>hour | AUC <sub>0-t(last)</sub><br>$\mu$ g·hour/mL | C <sub>max</sub><br>$\mu$ g/mL | t <sub>max</sub><br>hour | AUC <sub>0-t(last)</sub><br>$\mu$ g·hour/mL |
| Day 14            |                                |                          |                                             |                                |                          |                                             |
| 50 (n=3)          | 5.57 $\pm$ 2.19                | 4 $\pm$ 0                | 78 $\pm$ 35.3                               | 9.98 $\pm$ 1.25                | 6.67 $\pm$ 2.31          | 173 $\pm$ 26.9                              |
| 200 (n=3)         | 22 $\pm$ 5.59                  | 5.33 $\pm$ 2.31          | 387 $\pm$ 49.5                              | 21.5 $\pm$ 2.42                | 5.33 $\pm$ 2.31          | 381 $\pm$ 61.2                              |



|                                                         |           |           |                         |           |           |                        |
|---------------------------------------------------------|-----------|-----------|-------------------------|-----------|-----------|------------------------|
| 800 (n=5)                                               | 34.6±7.42 | 5.6±2.19  | 640±163                 | 38.6±4.73 | 8±0       | 667±67.8               |
| Day 28                                                  |           |           |                         |           |           |                        |
| 50 (n=3)                                                | 7.11±1.21 | 8±0       | 121±19.1                | 6.79±0.56 | 3.33±1.15 | 107±22.5               |
| 200 (n=3)                                               | 14±3.31   | 4±4       | 258±48                  | 15.4±2.66 | 11.7±10.1 | 277±29.9               |
| 800 (n=5)                                               | 20.8±4.14 | 12.4±9.81 | 388±68.2 <sup>(1)</sup> | 26±7.7    | 7.2±1.79  | 477±145 <sup>(1)</sup> |
|                                                         |           |           | 601±29 <sup>(2)</sup>   |           |           | 693±351 <sup>(2)</sup> |
| <sup>(1)</sup> AUC <sub>0-24</sub> ; <sup>(2)</sup> n=2 |           |           |                         |           |           |                        |

At each dose, the levels of the metabolite were similar in both genders. T<sub>max</sub> values of the metabolite were achieved later than the corresponding ones of the parent compound. On Day 28 after 800 mg/kg/day, mean ±SD apparent terminal half-lives were 6.7 ±0.7 and 7.8 ±0.7 (n=2) hours in males and females, respectively. After the three doses, systemic exposure to the metabolite increased with the dose (Figures 24 - 25). Accumulation ratios, in terms of both C<sub>max</sub> and AUC<sub>0-t(last)</sub>, were about 1.

The systemic exposure to the metabolite was remarkably higher than that to the parent compound.

Day 14 and Day 28 mean ±SD systemic exposure to the sulfoxide metabolite is reported in the following table

| Dose<br>mg/kg/day                                       | Male                      |                          |                                        | Female                    |                          |                                        |
|---------------------------------------------------------|---------------------------|--------------------------|----------------------------------------|---------------------------|--------------------------|----------------------------------------|
|                                                         | C <sub>max</sub><br>µg/mL | t <sub>max</sub><br>hour | AUC <sub>0-t(last)</sub><br>µg·hour/mL | C <sub>max</sub><br>µg/mL | t <sub>max</sub><br>hour | AUC <sub>0-t(last)</sub><br>µg·hour/mL |
| Day 14                                                  |                           |                          |                                        |                           |                          |                                        |
| 50 (n=3)                                                | 2.24±0.45                 | 1±0                      | 8.51±2.53                              | 3.73±0.73                 | 1.67±0.58                | 18.8±2.06                              |
| 200 (n=3)                                               | 8.96±2.53                 | 2±0                      | 56.1±9.96                              | 9.02±3.69                 | 2±0                      | 57.2±24.3                              |
| 800 (n=5)                                               | 12.5±2.85                 | 1.2±0.45                 | 113±39.9                               | 14.8±5.1                  | 2±1.22                   | 144±37.1                               |
| Day 28                                                  |                           |                          |                                        |                           |                          |                                        |
| 50 (n=3)                                                | 1.83±0.57                 | 1.67±0.58                | 14.2±2.72                              | 2.72±0.73                 | 1±0                      | 9.88±2.72                              |
| 200 (n=3)                                               | 5.76±1.17                 | 1.33±0.58                | 42.2±6.46                              | 5.43±0.34                 | 1±0                      | 33.8±1.65                              |
| 800 (n=5)                                               | 9.35±3.55                 | 1.6±0.55                 | 74.3±14.4 <sup>(1)</sup>               | 9.48±3.38                 | 1.4±0.55                 | 89±45.2                                |
|                                                         |                           |                          | 121±33 <sup>(2)</sup>                  |                           |                          |                                        |
| <sup>(1)</sup> AUC <sub>0-24</sub> ; <sup>(2)</sup> n=2 |                           |                          |                                        |                           |                          |                                        |

At each dose, the levels of the metabolite were similar in both genders. The maximal plasma concentrations of the sulfoxide metabolite were promptly achieved, on average, 1 - 2 hours post dosing. On Day 28 after 800 mg/kg/day, mean ±SD apparent terminal half-lives were 9.4 ±5.4 (n=2) hours in males. After the three doses, the systemic exposure to the metabolite increased with the dose (Figures 26 - 27). Accumulation ratios, in terms of both C<sub>max</sub> and AUC<sub>0-t(last)</sub>, were about 1.

The systemic exposure to the metabolite was remarkably higher than that to the parent compound.

## 8. CONCLUSIONS

After the first and repeated administrations of the three dose levels, no relevant gender difference in the systemic exposure to Fexinidazole was observed. AUCs of Fexinidazole increased less than expected assuming dose proportionality in the dose range investigated. No accumulation of Fexinidazole was observed.

Fexinidazole was extensively metabolized to the sulfone and sulfoxide derivatives. No accumulation of both metabolites was observed.

## 9. CONTRIBUTORS

## 10. ARCHIVING

Raw data and pharmacokinetic analysis produced at the Test Facility were filed in the Archives of Accelera, Nerviano Medical Sciences S.r.l., Nerviano (Italy) for the period of time agreed with the Sponsor (at least 3 years) after which the Sponsor will be contacted for instructions regarding dispatch or disposal of the material.

A copy of the protocol, the report with original signatures, a reserve sample and all relevant original documentation of the test item were filed by the Sponsor.

## 11. REFERENCES

1. Fexinidazole: 28-day Oral Toxicity Study in the Dog. Nerviano Medical Sciences Study Protocol 0505-2007-P, January 23, 2008.
2. Amendment no. 1 to Fexinidazole: 28-day Oral Toxicity Study in the Dog. February 21, 2008.
3. Analytical Procedure for the Determination of Fexinidazole and its Metabolites Fexinidazole Sulphoxide (M1) and Fexinidazole Sulphone (M2) in Dog Plasma by LC-MS-MS Following Plasma Protein Precipitation. Analytical Procedure Number: NMS/FEXINIDAZOLE/02.0. NervianoMS Reference Number: 0291-2007-AP. February 27, 2008.
4. Validation of an Analytical Method for the Determination of Fexinidazole and its Metabolites M1 and M2 in Dog Plasma by LC-MS-MS. Document Number: 0291-2007-R.
5. SOP: PCD-M-BPK-001-01: "Bioanalytical Run Acceptance". 13 December 2006.

## **TABLES AND FIGURES**

**Table 1.** Mean ( $\pm$ SD, n) systemic exposure parameters of Fexinidazole after single (Day 1) and repeated (Days 14 and 28) oral administrations of Fexinidazole to male and female Beagle dogs.

| Gender | Day | Dose<br>mg/kg/day | C <sub>max</sub><br>ng/mL |      |    | t <sub>max</sub><br>hour |       |    | AUC <sub>0-t(last)</sub><br>ng·hour/mL |      |    |
|--------|-----|-------------------|---------------------------|------|----|--------------------------|-------|----|----------------------------------------|------|----|
|        |     |                   | Mean                      | SD   | n  | Mean                     | SD    | n  | Mean                                   | SD   | n  |
| M      | 1   | 50                | 31.2                      | 12.4 | 3  | 0.5                      | 0     | 3  | 140                                    | 147  | 3  |
|        |     | 200               | 54.9                      | 10.8 | 3  | 1                        | 0.866 | 3  | 419                                    | 61.4 | 3  |
|        |     | 800               | 100                       | 21.2 | 5  | 1.1                      | 0.548 | 5  | 776                                    | 182  | 5  |
|        | 14  | 50                | 26.5                      | 13.0 | 3  | 0.5                      | 0     | 3  | 52.1                                   | 29.4 | 3  |
|        |     | 200               | 78.1                      | 23.5 | 3  | 1                        | 0.866 | 3  | 452                                    | 41.1 | 3  |
|        |     | 800               | 128                       | 56.9 | 5  | 1                        | 0     | 5  | 929                                    | 268  | 5  |
|        | 28  | 50                | 20.3                      | 7.89 | 3  | 1                        | 0     | 3  | 124                                    | 67   | 3  |
|        |     | 200               | 57.9                      | 12.5 | 3  | 1                        | 0     | 3  | 395                                    | 15.8 | 3  |
|        |     | 800               | 86.2                      | 38.5 | 5  | 1.2                      | 0.447 | 5  | 736                                    | 141  | 5  |
| F      | 1   | 50                | 42.4                      | 10.6 | 3  | 1                        | 0.866 | 3  | 237                                    | 105  | 3  |
|        |     | 200               | 84.1                      | 36.7 | 3  | 1                        | 0     | 3  | 454                                    | 119  | 3  |
|        |     | 800               | 184                       | 75.6 | 5  | 1.2                      | 0.447 | 5  | 895                                    | 437  | 5  |
|        | 14  | 50                | 41.9                      | 2.20 | 3  | 1.67                     | 0.577 | 3  | 246                                    | 117  | 3  |
|        |     | 200               | 77.7                      | 50.8 | 3  | 2                        | 0     | 3  | 443                                    | 217  | 3  |
|        |     | 800               | 152                       | 44.0 | 5  | 1.4                      | 0.548 | 5  | 1170                                   | 309  | 5  |
|        | 28  | 50                | 36.3                      | 15.1 | 3  | 1                        | 0     | 3  | 87.1                                   | 38.1 | 3  |
|        |     | 200               | 73                        | 12   | 3  | 1                        | 0     | 3  | 377                                    | 83.5 | 3  |
|        |     | 800               | 101                       | 47.1 | 5  | 1                        | 0     | 5  | 956                                    | 378  | 5  |
| M + F  | 1   | 50                | 36.8                      | 12.0 | 6  | 0.75                     | 0.612 | 6  | 188                                    | 126  | 6  |
|        |     | 200               | 69.5                      | 29.0 | 6  | 1                        | 0.548 | 6  | 437                                    | 86.5 | 6  |
|        |     | 800               | 142                       | 68.3 | 10 | 1.15                     | 0.474 | 10 | 836                                    | 322  | 10 |
|        | 14  | 50                | 34.2                      | 11.8 | 6  | 1.08                     | 0.736 | 6  | 149                                    | 131  | 6  |
|        |     | 200               | 77.9                      | 35.4 | 6  | 1.5                      | 0.775 | 6  | 447                                    | 140  | 6  |
|        |     | 800               | 140                       | 49.6 | 10 | 1.2                      | 0.422 | 10 | 1050                                   | 301  | 10 |
|        | 28  | 50                | 28.3                      | 13.9 | 6  | 1                        | 0     | 6  | 106                                    | 52.8 | 6  |
|        |     | 200               | 65.4                      | 13.7 | 6  | 1                        | 0     | 6  | 386                                    | 54.7 | 6  |
|        |     | 800               | 93.5                      | 41.3 | 10 | 1.1                      | 0.316 | 10 | 846                                    | 293  | 10 |

**Table 2.** Mean ( $\pm$ SD, n) systemic exposure parameters of the sulfone metabolite after single (Day 1) and repeated (Days 14 and 28) oral administrations of Fexinidazole to male and female Beagle dogs.

| Gender | Day | Dose<br>mg/kg/day | C <sub>max</sub><br>µg/mL |       |    | t <sub>max</sub><br>hour |      |    | AUC <sub>0-t(last)</sub><br>µg·hour/mL |      |    |
|--------|-----|-------------------|---------------------------|-------|----|--------------------------|------|----|----------------------------------------|------|----|
|        |     |                   | Mean                      | SD    | n  | Mean                     | SD   | n  | Mean                                   | SD   | n  |
| M      | 1   | 50                | 7.17                      | 1.74  | 3  | 8                        | 0    | 3  | 126                                    | 28.1 | 3  |
|        |     | 200               | 17.2                      | 1.69  | 3  | 13.3                     | 9.24 | 3  | 338                                    | 50.8 | 3  |
|        |     | 800               | 38.6                      | 2.83  | 5  | 17.6                     | 8.76 | 5  | 705                                    | 94.9 | 5  |
|        | 14  | 50                | 5.57                      | 2.19  | 3  | 4                        | 0    | 3  | 78.0                                   | 35.3 | 3  |
|        |     | 200               | 22.0                      | 5.59  | 3  | 5.33                     | 2.31 | 3  | 387                                    | 49.5 | 3  |
|        |     | 800               | 34.6                      | 7.42  | 5  | 5.6                      | 2.19 | 5  | 640                                    | 163  | 5  |
|        | 28  | 50                | 7.11                      | 1.21  | 3  | 8                        | 0    | 3  | 121                                    | 19.1 | 3  |
|        |     | 200               | 14                        | 3.31  | 3  | 4                        | 4    | 3  | 258                                    | 48   | 3  |
|        |     | 800               | 20.8                      | 4.14  | 5  | 12.4                     | 9.81 | 5  | 388*                                   | 68.2 | 5  |
| F      | 1   | 50                | 10.0                      | 1.60  | 3  | 6.67                     | 2.31 | 3  | 170                                    | 37.8 | 3  |
|        |     | 200               | 18.1                      | 3.42  | 3  | 12.0                     | 10.6 | 3  | 358                                    | 85.7 | 3  |
|        |     | 800               | 33.6                      | 10.9  | 5  | 11.2                     | 7.16 | 5  | 614                                    | 216  | 5  |
|        | 14  | 50                | 9.98                      | 1.25  | 3  | 6.67                     | 2.31 | 3  | 173                                    | 26.9 | 3  |
|        |     | 200               | 21.5                      | 2.42  | 3  | 5.33                     | 2.31 | 3  | 381                                    | 61.2 | 3  |
|        |     | 800               | 38.6                      | 4.73  | 5  | 8                        | 0    | 5  | 667                                    | 67.8 | 5  |
|        | 28  | 50                | 6.79                      | 0.555 | 3  | 3.33                     | 1.15 | 3  | 107                                    | 22.5 | 3  |
|        |     | 200               | 15.4                      | 2.66  | 3  | 11.7                     | 10.1 | 3  | 277                                    | 29.9 | 3  |
|        |     | 800               | 26                        | 7.7   | 5  | 7.2                      | 1.79 | 5  | 477*                                   | 145  | 5  |
| M + F  | 1   | 50                | 8.59                      | 2.15  | 6  | 7.33                     | 1.63 | 6  | 148                                    | 38.3 | 6  |
|        |     | 200               | 17.6                      | 2.46  | 6  | 12.7                     | 8.91 | 6  | 348                                    | 63.9 | 6  |
|        |     | 800               | 36.1                      | 7.94  | 10 | 14.4                     | 8.26 | 10 | 660                                    | 164  | 10 |
|        | 14  | 50                | 7.78                      | 2.89  | 6  | 5.33                     | 2.07 | 6  | 126                                    | 59.1 | 6  |
|        |     | 200               | 21.8                      | 3.86  | 6  | 5.33                     | 2.07 | 6  | 384                                    | 49.9 | 6  |
|        |     | 800               | 36.6                      | 6.24  | 10 | 6.80                     | 1.93 | 10 | 653                                    | 118  | 10 |
|        | 28  | 50                | 6.95                      | 0.862 | 6  | 5.67                     | 2.66 | 6  | 114                                    | 20.1 | 6  |
|        |     | 200               | 14.7                      | 2.79  | 6  | 7.86                     | 8.08 | 6  | 267                                    | 37.2 | 6  |
|        |     | 800               | 23.4                      | 6.43  | 10 | 9.8                      | 7.19 | 10 | 432*                                   | 117  | 10 |

\* AUC<sub>0-24</sub>

**Table 3.** Mean ( $\pm$ SD, n) systemic exposure parameters of the sulfoxide metabolite after single (Day 1) and repeated (Days 14 and 28) oral administrations of Fexinidazole to male and female Beagle dogs.

| Gender | Day | Dose<br>mg/kg/day | C <sub>max</sub><br>µg/mL |       |    | t <sub>max</sub><br>hour |       |    | AUC <sub>0-t(last)</sub><br>µg·hour/mL |      |    |
|--------|-----|-------------------|---------------------------|-------|----|--------------------------|-------|----|----------------------------------------|------|----|
|        |     |                   | Mean                      | SD    | n  | Mean                     | SD    | n  | Mean                                   | SD   | n  |
| M      | 1   | 50                | 3.55                      | 1.3   | 3  | 1                        | 0     | 3  | 19.2                                   | 5.82 | 3  |
|        |     | 200               | 7.55                      | 1.03  | 3  | 1.67                     | 0.577 | 3  | 50.7                                   | 8.61 | 3  |
|        |     | 800               | 13.4                      | 3.22  | 5  | 1.50                     | 0.707 | 5  | 104                                    | 11.3 | 5  |
|        | 14  | 50                | 2.24                      | 0.454 | 3  | 1                        | 0     | 3  | 8.51                                   | 2.53 | 3  |
|        |     | 200               | 8.96                      | 2.53  | 3  | 2                        | 0     | 3  | 56.1                                   | 9.96 | 3  |
|        |     | 800               | 12.5                      | 2.85  | 5  | 1.2                      | 0.447 | 5  | 113                                    | 39.9 | 5  |
|        | 28  | 50                | 1.83                      | 0.567 | 3  | 1.67                     | 0.577 | 3  | 14.2                                   | 2.72 | 3  |
|        |     | 200               | 5.76                      | 1.17  | 3  | 1.33                     | 0.577 | 3  | 42.2                                   | 6.46 | 3  |
|        |     | 800               | 9.35                      | 3.55  | 5  | 1.6                      | 0.548 | 5  | 74.3*                                  | 14.4 | 5  |
| F      | 1   | 50                | 3.97                      | 0.738 | 3  | 1.33                     | 0.577 | 3  | 20                                     | 6.81 | 3  |
|        |     | 200               | 8.70                      | 3.95  | 3  | 0.833                    | 0.289 | 3  | 52.1                                   | 20.6 | 3  |
|        |     | 800               | 15.6                      | 4.64  | 5  | 1.60                     | 0.548 | 5  | 121                                    | 44.4 | 5  |
|        | 14  | 50                | 3.73                      | 0.725 | 3  | 1.67                     | 0.577 | 3  | 18.8                                   | 2.06 | 3  |
|        |     | 200               | 9.02                      | 3.69  | 3  | 2.00                     | 0.00  | 3  | 57.2                                   | 24.3 | 3  |
|        |     | 800               | 14.8                      | 5.10  | 5  | 2.00                     | 1.22  | 5  | 144                                    | 37.1 | 5  |
|        | 28  | 50                | 2.72                      | 0.729 | 3  | 1                        | 0     | 3  | 9.88                                   | 2.72 | 3  |
|        |     | 200               | 5.43                      | 0.34  | 3  | 1                        | 0     | 3  | 33.8                                   | 1.65 | 3  |
|        |     | 800               | 9.48                      | 3.38  | 5  | 1.4                      | 0.548 | 5  | 89                                     | 45.2 | 5  |
| M + F  | 1   | 50                | 3.76                      | 0.975 | 6  | 1.17                     | 0.408 | 6  | 19.6                                   | 5.68 | 6  |
|        |     | 200               | 8.12                      | 2.66  | 6  | 1.25                     | 0.612 | 6  | 51.4                                   | 14.1 | 6  |
|        |     | 800               | 14.5                      | 3.95  | 10 | 1.55                     | 0.599 | 10 | 112                                    | 31.8 | 10 |
|        | 14  | 50                | 2.99                      | 0.976 | 6  | 1.33                     | 0.516 | 6  | 13.6                                   | 5.99 | 6  |
|        |     | 200               | 8.99                      | 2.83  | 6  | 2                        | 0     | 6  | 56.7                                   | 16.6 | 6  |
|        |     | 800               | 13.6                      | 4.09  | 10 | 1.60                     | 0.966 | 10 | 129                                    | 39.8 | 10 |
|        | 28  | 50                | 2.27                      | 0.76  | 6  | 1.33                     | 0.516 | 6  | 12.1                                   | 3.41 | 6  |
|        |     | 200               | 5.6                       | 0.792 | 6  | 1.17                     | 0.408 | 6  | 38                                     | 6.26 | 6  |
|        |     | 800               | 9.41                      | 3.27  | 10 | 1.5                      | 0.527 | 10 | 81.7*                                  | 32.6 | 10 |

\* AUC<sub>0-24</sub>

**Table 4.** Day 1 individual and mean ( $\pm$ SD, %CV) pharmacokinetic parameters of Fexinidazole after oral 50 mg/kg/day of Fexinidazole in male Beagle dogs.

| Parameter                      | Units      | ID 2514 | ID 2521 | ID 2529 | Mean  | SD    | %CV   |
|--------------------------------|------------|---------|---------|---------|-------|-------|-------|
| C <sub>max</sub>               | ng/mL      | 45.5    | 23.1    | 24.9    | 31.2  | 12.4  | 39.9  |
| t <sub>max</sub>               | hour       | 0.5     | 0.5     | 0.5     | 0.5   | 0     | 0     |
| AUC Interval                   | hour       | (0-24)  | (0-4)   | (0-4)   |       |       |       |
| AUC <sub>0-t(last)</sub>       | ng·hour/mL | 309     | 64.1    | 45.7    | 140   | 147   | 105.3 |
| C <sub>max</sub> /Dose         | ng/mL      | 0.910   | 0.462   | 0.498   | 0.623 | 0.249 | 39.9  |
| AUC <sub>0-t(last)</sub> /Dose | ng·hour/mL | 6.18    | 1.28    | 0.914   | 2.79  | 2.94  | 105.3 |

**Table 5.** Day 14 individual and mean ( $\pm$ SD, %CV) pharmacokinetic parameters of Fexinidazole after oral 50 mg/kg/day of Fexinidazole in male Beagle dogs.

| Parameter                      | Units      | ID 2514 | ID 2521 | ID 2529 | Mean  | SD    | %CV  |
|--------------------------------|------------|---------|---------|---------|-------|-------|------|
| C <sub>max</sub>               | ng/mL      | 41.4    | 21.1    | 17.1    | 26.5  | 13    | 49.1 |
| t <sub>max</sub>               | hour       | 0.5     | 0.5     | 0.5     | 0.5   | 0     | 0    |
| AUC Interval                   | hour       | (0-4)   | (0-4)   | (0-2)   |       |       |      |
| AUC <sub>0-t(last)</sub>       | ng·hour/mL | 83.2    | 48.3    | 24.8    | 52.1  | 29.4  | 56.4 |
| C <sub>max</sub> /Dose         | ng/mL      | 0.828   | 0.422   | 0.342   | 0.531 | 0.261 | 49.1 |
| AUC <sub>0-t(last)</sub> /Dose | ng·hour/mL | 1.66    | 0.967   | 0.496   | 1.04  | 0.586 | 56.2 |
| RA, C <sub>max</sub>           |            | 0.91    | 0.913   | 0.687   | 0.84  | 0.13  | 15.5 |
| RA, AUC <sub>0-t(last)</sub>   |            | 0.269   | 0.754   | 0.543   | 0.522 | 0.243 | 46.5 |

**Table 6.** Day 28 individual and mean ( $\pm$ SD, %CV) pharmacokinetic parameters of Fexinidazole after oral 50 mg/kg/day of Fexinidazole in male Beagle dogs.

| Parameter                      | Units      | ID 2514 | ID 2521               | ID 2529 | Mean  | SD     | %CV   |
|--------------------------------|------------|---------|-----------------------|---------|-------|--------|-------|
| C <sub>max</sub>               | ng/mL      | 29.3    | 17                    | 14.6    | 20.3  | 7.89   | 38.8  |
| t <sub>max</sub>               | hour       | 1       | 1                     | 1       | 1     | 0      | 0     |
| AUC Interval                   | hour       | (0-8)   | (0-24) <sup>(1)</sup> | (0-8)   |       |        |       |
| AUC <sub>0-t(last)</sub>       | ng·hour/mL | 104     | 199                   | 69.6    | 124   | 67     | 54    |
| C <sub>max</sub> /Dose         | ng/mL      | 0.586   | 0.34                  | 0.292   | 0.406 | 0.158  | 38.8  |
| AUC <sub>0-t(last)</sub> /Dose | ng·hour/mL | 2.08    | 3.97                  | 1.39    | 2.48  | 1.34   | 53.9  |
| RA, C <sub>max</sub>           |            | 0.644   | 0.736                 | 0.586   | 0.655 | 0.0754 | 0.644 |
| RA, AUC <sub>0-t(last)</sub>   |            | 0.337   | 3.1                   | 1.52    | 1.65  | 1.39   | 0.337 |

<sup>(1)</sup> Nominal time

**Table 7.** Day 1 individual and mean ( $\pm$ SD, %CV) pharmacokinetic parameters of Fexinidazole after oral 50 mg/kg/day of Fexinidazole in female Beagle dogs.

| Parameter                      | Units      | ID 2562 | ID 2563 | ID 2576 | Mean  | SD    | %CV  |
|--------------------------------|------------|---------|---------|---------|-------|-------|------|
| C <sub>max</sub>               | ng/mL      | 38.8    | 54.3    | 34.1    | 42.4  | 10.6  | 24.9 |
| t <sub>max</sub>               | hour       | 2       | 0.5     | 0.5     | 1.00  | 0.87  | 86.6 |
| AUC Interval                   | hour       | (0-24)  | (0-4)   | (0-24)  |       |       |      |
| AUC <sub>0-t(last)</sub>       | ng·hour/mL | 317     | 118     | 275     | 237   | 105   | 44.3 |
| C <sub>max</sub> /Dose         | ng/mL      | 0.776   | 1.09    | 0.682   | 0.849 | 0.214 | 25.2 |
| AUC <sub>0-t(last)</sub> /Dose | ng·hour/mL | 6.35    | 2.37    | 5.50    | 4.74  | 2.10  | 44.2 |

**Table 8.** Day 14 individual and mean ( $\pm$ SD, %CV) pharmacokinetic parameters of Fexinidazole after oral 50 mg/kg/day of Fexinidazole in female Beagle dogs.

| Parameter                      | Units      | ID 2562 | ID 2563 | ID 2576 | Mean  | SD     | %CV  |
|--------------------------------|------------|---------|---------|---------|-------|--------|------|
| C <sub>max</sub>               | ng/mL      | 44.4    | 40.8    | 40.4    | 41.9  | 2.2    | 5.3  |
| t <sub>max</sub>               | hour       | 1       | 2       | 2       | 1.67  | 0.577  | 34.6 |
| AUC Interval                   | hour       | (0-24 ) | (0-4 )  | (0-24)  |       |        |      |
| AUC <sub>0-t(last)</sub>       | ng·hour/mL | 275     | 118     | 346     | 246   | 117    | 47.4 |
| C <sub>max</sub> /Dose         | ng/mL      | 0.888   | 0.816   | 0.808   | 0.837 | 0.0441 | 5.3  |
| AUC <sub>0-t(last)</sub> /Dose | ng·hour/mL | 5.51    | 2.37    | 6.93    | 4.94  | 2.33   | 47.3 |
| RA,C <sub>max</sub>            |            | 1.14    | 0.751   | 1.18    | 1.03  | 0.239  | 23.3 |
| RA,AUC <sub>0-t(last)</sub>    |            | 0.868   | 1       | 1.26    | 1.04  | 0.199  | 19.1 |

**Table 9.** Day 28 individual and mean ( $\pm$ SD, %CV) pharmacokinetic parameters of Fexinidazole after oral 50 mg/kg/day of Fexinidazole in female Beagle dogs.

| Parameter                      | Units      | ID 2562 | ID 2563 | ID 2576 | Mean  | SD    | %CV  |
|--------------------------------|------------|---------|---------|---------|-------|-------|------|
| C <sub>max</sub>               | ng/mL      | 23.5    | 53      | 32.4    | 36.3  | 15.1  | 41.7 |
| t <sub>max</sub>               | hour       | 1       | 1       | 1       | 1     | 0     | 0    |
| AUC Interval                   | hour       | (0-4)   | (0-4)   | (0-4)   |       |       |      |
| AUC <sub>0-t(last)</sub>       | ng·hour/mL | 62.9    | 131     | 67.5    | 87.1  | 38.1  | 43.7 |
| C <sub>max</sub> /Dose         | ng/mL      | 0.470   | 1.06    | 0.648   | 0.726 | 0.303 | 41.7 |
| AUC <sub>0-t(last)</sub> /Dose | ng·hour/mL | 1.26    | 2.63    | 1.35    | 1.75  | 0.766 | 43.9 |
| RA,C <sub>max</sub>            |            | 0.606   | 0.976   | 0.95    | 0.844 | 0.207 | 24.5 |
| RA,AUC <sub>0-t(last)</sub>    |            | 0.198   | 1.11    | 0.245   | 0.518 | 0.513 | 99.1 |



**Table 10.** Day 1 individual and mean ( $\pm$ SD, %CV) pharmacokinetic parameters of Fexinidazole after oral 200 mg/kg/day of Fexinidazole in male Beagle dogs.

| Parameter                      | Units      | ID 2515 | ID 2523 | ID 2526 | Mean  | SD     | %CV  |
|--------------------------------|------------|---------|---------|---------|-------|--------|------|
| C <sub>max</sub>               | ng/mL      | 46.4    | 67      | 51.3    | 54.9  | 10.8   | 19.6 |
| t <sub>max</sub>               | hour       | 0.5     | 2       | 0.5     | 1     | 0.866  | 86.6 |
| AUC Interval                   | hour       | (0-24)  | (0-24)  | (0-24)  |       |        |      |
| AUC <sub>0-t(last)</sub>       | ng·hour/mL | 467     | 350     | 441     | 419   | 61.4   | 14.7 |
| C <sub>max</sub> /Dose         | ng/mL      | 0.232   | 0.335   | 0.257   | 0.275 | 0.0537 | 19.6 |
| AUC <sub>0-t(last)</sub> /Dose | ng·hour/mL | 2.33    | 1.75    | 2.21    | 2.10  | 0.306  | 14.6 |

**Table 11.** Day 14 individual and mean ( $\pm$ SD, %CV) pharmacokinetic parameters of Fexinidazole after oral 200 mg/kg/day of Fexinidazole in male Beagle dogs.

| Parameter                      | Units      | ID 2515 | ID 2523 | ID 2526 | Mean  | SD    | %CV  |
|--------------------------------|------------|---------|---------|---------|-------|-------|------|
| C <sub>max</sub>               | ng/mL      | 52.6    | 82.9    | 98.8    | 78.1  | 23.5  | 30.1 |
| t <sub>max</sub>               | hour       | 0.5     | 2       | 0.5     | 1     | 0.866 | 86.6 |
| AUC Interval                   | hour       | (0-24)  | (0-24)  | (0-24)  |       |       |      |
| AUC <sub>0-t(last)</sub>       | ng·hour/mL | 491     | 456     | 409     | 452   | 41.1  | 9.1  |
| C <sub>max</sub> /Dose         | ng/mL      | 0.263   | 0.415   | 0.494   | 0.391 | 0.117 | 30.1 |
| AUC <sub>0-t(last)</sub> /Dose | ng·hour/mL | 2.45    | 2.28    | 2.05    | 2.26  | 0.201 | 8.9  |
| RA, C <sub>max</sub>           |            | 1.13    | 1.24    | 1.93    | 1.43  | 0.431 | 30.1 |
| RA, AUC <sub>0-t(last)</sub>   |            | 1.05    | 1.3     | 0.927   | 1.09  | 0.191 | 17.5 |

**Table 12.** Day 28 individual and mean ( $\pm$ SD, %CV) pharmacokinetic parameters of Fexinidazole after oral 200 mg/kg/day of Fexinidazole in male Beagle dogs.

| Parameter                      | Units      | ID 2515 | ID 2523 | ID 2526 | Mean  | SD     | %CV  |
|--------------------------------|------------|---------|---------|---------|-------|--------|------|
| C <sub>max</sub>               | ng/mL      | 71.2    | 56.1    | 46.3    | 57.9  | 12.5   | 21.7 |
| t <sub>max</sub>               | hour       | 1       | 1       | 1       | 1     | 0      | 0    |
| AUC Interval <sup>(1)</sup>    | hour       | (0-24)  | (0-24)  | (0-24)  |       |        |      |
| AUC <sub>0-t(last)</sub>       | ng·hour/mL | 399     | 378     | 409     | 395   | 15.8   | 4    |
| C <sub>max</sub> /Dose         | ng/mL      | 0.356   | 0.281   | 0.232   | 0.290 | 0.0625 | 21.6 |
| AUC <sub>0-t(last)</sub> /Dose | ng·hour/mL | 1.99    | 1.89    | 2.04    | 1.97  | 0.0764 | 3.9  |
| RA, C <sub>max</sub>           |            | 1.53    | 0.837   | 0.903   | 1.09  | 0.385  | 35.3 |
| RA, AUC <sub>0-t(last)</sub>   |            | 0.854   | 1.08    | 0.927   | 0.954 | 0.115  | 12.1 |
| <sup>(1)</sup> Nominal time    |            |         |         |         |       |        |      |

**Table 13.** Day 1 individual and mean ( $\pm$ SD, %CV) pharmacokinetic parameters of Fexinidazole after oral 200 mg/kg/day of Fexinidazole in female Beagle Dogs.

| Parameter                      | Units      | ID 2561 | ID 2567 | ID 2570 | Mean  | SD    | %CV  |
|--------------------------------|------------|---------|---------|---------|-------|-------|------|
| C <sub>max</sub>               | ng/mL      | 57.4    | 126     | 69      | 84.1  | 36.7  | 43.6 |
| t <sub>max</sub>               | hour       | 1       | 1       | 1       | 1     | 0     | 0    |
| AUC Interval                   | hour       | (0-24 ) | (0-24)  | (0-24 ) |       |       |      |
| AUC <sub>0-t(last)</sub>       | ng·hour/mL | 357     | 586     | 418     | 454   | 119   | 26.1 |
| C <sub>max</sub> /Dose         | ng/mL      | 0.287   | 0.630   | 0.345   | 0.421 | 0.184 | 43.6 |
| AUC <sub>0-t(last)</sub> /Dose | ng·hour/mL | 1.79    | 2.93    | 2.09    | 2.27  | 0.591 | 26   |

**Table 14.** Day 14 individual and mean ( $\pm$ SD, %CV) pharmacokinetic parameters of Fexinidazole after oral 200 mg/kg/day of Fexinidazole in female Beagle dogs.

| Parameter                      | Units      | ID 2561 | ID 2567 | ID 2570 | Mean  | SD    | %CV  |
|--------------------------------|------------|---------|---------|---------|-------|-------|------|
| C <sub>max</sub>               | ng/mL      | 42.9    | 136     | 54.2    | 77.7  | 50.8  | 65.4 |
| t <sub>max</sub>               | hour       | 2       | 2       | 2       | 2     | 0     | 0    |
| AUC Interval                   | hour       | (0-8)   | (0-8)   | (0-24)  |       |       |      |
| AUC <sub>0-t(last)</sub>       | ng·hour/mL | 193     | 588     | 547     | 443   | 217   | 49.1 |
| C <sub>max</sub> /Dose         | ng/mL      | 0.215   | 0.680   | 0.271   | 0.389 | 0.254 | 65.3 |
| AUC <sub>0-t(last)</sub> /Dose | ng·hour/mL | 0.965   | 2.94    | 2.73    | 2.21  | 1.08  | 49   |
| RA, C <sub>max</sub>           |            | 0.747   | 1.08    | 0.786   | 0.871 | 0.182 | 20.9 |
| RA, AUC <sub>0-t(last)</sub>   |            | 0.541   | 1       | 1.31    | 0.951 | 0.387 | 40.7 |

**Table 15.** Day 28 individual and mean ( $\pm$ SD, %CV) pharmacokinetic parameters of Fexinidazole after oral 200 mg/kg/day of Fexinidazole in female Beagle dogs.

| Parameter                      | Units      | ID 2561 | ID 2567               | ID 2570               | Mean  | SD    | %CV  |
|--------------------------------|------------|---------|-----------------------|-----------------------|-------|-------|------|
| C <sub>max</sub>               | ng/mL      | 84      | 74.7                  | 60.2                  | 73    | 12    | 16.4 |
| t <sub>max</sub>               | hour       | 1       | 1                     | 1                     | 1     | 0     | 0    |
| AUC Interval                   | hour       | (0-8)   | (0-24) <sup>(1)</sup> | (0-24) <sup>(1)</sup> |       |       |      |
| AUC <sub>0-t(last)</sub>       | ng·hour/mL | 286     | 450                   | 395                   | 377   | 83.5  | 22.1 |
| C <sub>max</sub> /Dose         | ng/mL      | 0.420   | 0.374                 | 0.301                 | 0.365 | 0.060 | 16.4 |
| AUC <sub>0-t(last)</sub> /Dose | ng·hour/mL | 1.43    | 2.25                  | 1.98                  | 1.89  | 0.418 | 22.1 |
| RA, C <sub>max</sub>           |            | 1.46    | 0.593                 | 0.872                 | 0.976 | 0.444 | 45.5 |
| RA, AUC <sub>0-t(last)</sub>   |            | 0.801   | 0.768                 | 0.945                 | 0.838 | 0.094 | 11.2 |

<sup>(1)</sup> Nominal time

**Table 16.** Day 1 individual and mean ( $\pm$ SD, %CV) pharmacokinetic parameters of Fexinidazole after oral 800 mg/kg/day of Fexinidazole in male Beagle dogs.

| Parameter                      | Units      | Dog ID |        |        |        |        | Mean  | SD     | %CV  |
|--------------------------------|------------|--------|--------|--------|--------|--------|-------|--------|------|
|                                |            | 2517   | 2519   | 2525   | 2528   | 2530   |       |        |      |
| C <sub>max</sub>               | ng/mL      | 132    | 108    | 80.8   | 98.8   | 81.5   | 100   | 21.2   | 21.2 |
| t <sub>max</sub>               | hour       | 0.5    | 1      | 2      | 1      | 1      | 1.1   | 0.548  | 49.8 |
| AUC Interval                   | hour       | (0-24) | (0-24) | (0-24) | (0-24) | (0-24) |       |        |      |
| AUC <sub>0-t(last)</sub>       | ng·hour/mL | 630    | 623    | 811    | 1070   | 748    | 776   | 182    | 23.5 |
| C <sub>max</sub> /Dose         | ng/mL      | 0.165  | 0.135  | 0.101  | 0.124  | 0.102  | 0.125 | 0.0265 | 21.1 |
| AUC <sub>0-t(last)</sub> /Dose | ng·hour/mL | 0.787  | 0.779  | 1.01   | 1.34   | 0.935  | 0.97  | 0.229  | 23.6 |

**Table 17.** Day 14 individual and mean ( $\pm$ SD, %CV) pharmacokinetic parameters of Fexinidazole after oral 800 mg/kg/day of Fexinidazole in male Beagle dogs.

| Parameter                      | Units      | Dog ID |        |        |        |        | Mean | SD     | %CV  |
|--------------------------------|------------|--------|--------|--------|--------|--------|------|--------|------|
|                                |            | 2517   | 2519   | 2525   | 2528   | 2530   |      |        |      |
| C <sub>max</sub>               | ng/mL      | 130    | 220    | 75.1   | 127    | 86.9   | 128  | 56.9   | 44.5 |
| t <sub>max</sub>               | hour       | 1      | 1      | 1      | 1      | 1      | 1    | 0      | 0    |
| AUC Interval                   | hour       | (0-24) | (0-24) | (0-24) | (0-24) | (0-24) |      |        |      |
| AUC <sub>0-t(last)</sub>       | ng·hour/mL | 1120   | 663    | 611    | 1090   | 1160   | 929  | 268    | 28.9 |
| C <sub>max</sub> /Dose         | ng/mL      | 0.163  | 0.275  | 0.0939 | 0.159  | 0.109  | 0.16 | 0.0711 | 44.4 |
| AUC <sub>0-t(last)</sub> /Dose | ng·hour/mL | 1.4    | 0.829  | 0.763  | 1.36   | 1.44   | 1.16 | 0.333  | 28.7 |
| RA, C <sub>max</sub>           |            | 0.985  | 2.04   | 0.929  | 1.29   | 1.07   | 1.26 | 0.455  | 36.1 |
| RA, AUC <sub>0-t(last)</sub>   |            | 1.78   | 1.06   | 0.753  | 1.02   | 1.55   | 1.23 | 0.419  | 34   |

**Table 18.** Day 28 individual and mean ( $\pm$ SD, %CV) pharmacokinetic parameters of Fexinidazole after oral 800 mg/kg/day of Fexinidazole in male Beagle Dogs.

| Parameter                      | Units      | Dog ID |        |        |        |        | Mean  | SD     | %CV  |
|--------------------------------|------------|--------|--------|--------|--------|--------|-------|--------|------|
|                                |            | 2517   | 2519   | 2525   | 2528   | 2530   |       |        |      |
| C <sub>max</sub>               | ng/mL      | 141    | 54.1   | 107    | 48.4   | 80.4   | 86.2  | 38.5   | 44.7 |
| t <sub>max</sub>               | hour       | 1      | 1      | 1      | 2      | 1      | 1.2   | 0.447  | 37.3 |
| AUC Interval <sup>(1)</sup>    | hour       | (0-24) | (0-24) | (0-24) | (0-24) | (0-24) |       |        |      |
| AUC <sub>0-t(last)</sub>       | ng·hour/mL | 938    | 824    | 673    | 605    | 638    | 736   | 141    | 19.1 |
| C <sub>max</sub> /Dose         | ng/mL      | 0.176  | 0.0676 | 0.134  | 0.0605 | 0.101  | 0.108 | 0.0481 | 44.6 |
| AUC <sub>0-t(last)</sub> /Dose | ng·hour/mL | 1.17   | 1.03   | 0.842  | 0.757  | 0.797  | 0.919 | 0.175  | 19   |
| RA, C <sub>max</sub>           |            | 1.07   | 0.501  | 1.32   | 0.49   | 0.987  | 0.874 | 0.367  | 42   |
| RA, AUC <sub>0-t(last)</sub>   |            | 1.49   | 1.32   | 0.83   | 0.565  | 0.853  | 1.01  | 0.381  | 37.7 |
| <sup>(1)</sup> Nominal time    |            |        |        |        |        |        |       |        |      |

**Table 19.** Day 1 individual and mean ( $\pm$ SD, %CV) pharmacokinetic parameters of Fexinidazole after oral 800 mg/kg/day of Fexinidazole in female Beagle dogs.

| Parameter                      | Units      | Dog ID |        |        |        |        | Mean  | SD     | %CV  |
|--------------------------------|------------|--------|--------|--------|--------|--------|-------|--------|------|
|                                |            | 2564   | 2565   | 2569   | 2571   | 2573   |       |        |      |
|                                |            | 293    | 233    | 128    | 135    | 129    | 184   | 75.6   | 41.2 |
| C <sub>max</sub>               | ng/mL      | 293    | 233    | 128    | 135    | 129    | 184   | 75.6   | 41.2 |
| t <sub>max</sub>               | hour       | 1      | 2      | 1      | 1      | 1      | 1.2   | 0.447  | 37.3 |
| AUC Interval                   | hour       | (0-8)  | (0-24) | (0-24) | (0-24) | (0-24) |       |        |      |
| AUC <sub>0-t(last)</sub>       | ng·hour/mL | 628    | 1580   | 1050   | 736    | 479    | 895   | 437    | 48.8 |
| C <sub>max</sub> /Dose         | ng/mL      | 0.366  | 0.291  | 0.160  | 0.169  | 0.161  | 0.229 | 0.0943 | 41.1 |
| AUC <sub>0-t(last)</sub> /Dose | ng·hour/mL | 0.785  | 1.97   | 1.31   | 0.920  | 0.599  | 1.12  | 0.544  | 48.7 |

**Table 20.** Day 14 individual and mean ( $\pm$ SD, %CV) pharmacokinetic parameters of Fexinidazole after oral 800 mg/kg/day of Fexinidazole in female Beagle dogs.

| Parameter                      | Units      | Dog ID |        |        |        |        | Mean  | SD     | %CV  |
|--------------------------------|------------|--------|--------|--------|--------|--------|-------|--------|------|
|                                |            | 2564   | 2565   | 2569   | 2571   | 2573   |       |        |      |
|                                |            | 194    | 171    | 182    | 89.2   | 124    | 152   | 44     | 29   |
| C <sub>max</sub>               | ng/mL      | 194    | 171    | 182    | 89.2   | 124    | 152   | 44     | 29   |
| t <sub>max</sub>               | hour       | 1      | 2      | 2      | 1      | 1      | 1.4   | 0.548  | 39.1 |
| AUC Interval                   | hour       | (0-24) | (0-24) | (0-24) | (0-24) | (0-24) |       |        |      |
| AUC <sub>0-t(last)</sub>       | ng·hour/mL | 1270   | 1660   | 1020   | 869    | 1030   | 1170  | 309    | 26.4 |
| C <sub>max</sub> /Dose         | ng/mL      | 0.243  | 0.214  | 0.228  | 0.112  | 0.155  | 0.19  | 0.0551 | 28.9 |
| AUC <sub>0-t(last)</sub> /Dose | ng·hour/mL | 1.59   | 2.07   | 1.27   | 1.09   | 1.29   | 1.46  | 0.384  | 26.3 |
| RA, C <sub>max</sub>           |            | 0.662  | 0.734  | 1.42   | 0.661  | 0.961  | 0.888 | 0.323  | 36.4 |
| RA, AUC <sub>0-t(last)</sub>   |            | 2.02   | 1.05   | 0.971  | 1.18   | 2.15   | 1.48  | 0.565  | 38.3 |

**Table 21.** Day 28 individual and mean ( $\pm$ SD, %CV) pharmacokinetic parameters of Fexinidazole after oral 800 mg/kg/day of Fexinidazole in female Beagle dogs.

| Parameter                      | Units      | Dog ID |        |        |        |        | Mean  | SD    | %CV  |
|--------------------------------|------------|--------|--------|--------|--------|--------|-------|-------|------|
|                                |            | 2564   | 2565   | 2569   | 2571   | 2573   |       |       |      |
|                                |            | 94.7   | 179    | 102    | 69.5   | 59     | 101   | 47.1  | 46.7 |
| C <sub>max</sub>               | ng/mL      | 94.7   | 179    | 102    | 69.5   | 59     | 101   | 47.1  | 46.7 |
| t <sub>max</sub>               | hour       | 1      | 1      | 1      | 1      | 1      | 1     | 0     | 0    |
| AUC Interval <sup>(1)</sup>    | hour       | (0-24) | (0-24) | (0-24) | (0-24) | (0-24) |       |       |      |
| AUC <sub>0-t(last)</sub>       | ng·hour/mL | 684    | 1540   | 1140   | 696    | 720    | 956   | 378   | 39.6 |
| C <sub>max</sub> /Dose         | ng/mL      | 0.118  | 0.224  | 0.128  | 0.0869 | 0.0738 | 0.126 | 0.059 | 46.8 |
| AUC <sub>0-t(last)</sub> /Dose | ng·hour/mL | 0.854  | 1.93   | 1.42   | 0.869  | 0.900  | 1.19  | 0.474 | 39.7 |
| RA, C <sub>max</sub>           |            | 0.323  | 0.768  | 0.797  | 0.515  | 0.457  | 0.572 | 0.205 | 35.8 |
| RA, AUC <sub>0-t(last)</sub>   |            | 1.09   | 0.975  | 1.09   | 0.946  | 1.5    | 1.12  | 0.224 | 20   |
| <sup>(1)</sup> Nominal time    |            |        |        |        |        |        |       |       |      |

**Table 22.** Day 1 individual and mean ( $\pm$ SD, %CV) pharmacokinetic parameters of the sulfone metabolite after oral 50 mg/kg/day of Fexinidazole in male Beagle dogs.

| Parameter                      | Units      | ID 2514 | ID 2521 | ID 2529 | Mean  | SD    | %CV  |
|--------------------------------|------------|---------|---------|---------|-------|-------|------|
| C <sub>max</sub>               | µg/mL      | 9.17    | 6.33    | 6.02    | 7.17  | 1.74  | 24.2 |
| t <sub>max</sub>               | hour       | 8       | 8       | 8       | 8     | 0     | 0    |
| AUC Interval                   | hour       | (0-24)  | (0-24)  | (0-24)  |       |       |      |
| AUC <sub>0-t(last)</sub>       | µg·hour/mL | 158     | 107     | 112     | 126   | 28.1  | 22.4 |
| C <sub>max</sub> /Dose         | µg/mL      | 0.183   | 0.127   | 0.12    | 0.143 | 0.035 | 24.1 |
| AUC <sub>0-t(last)</sub> /Dose | µg·hour/mL | 3.16    | 2.13    | 2.25    | 2.51  | 0.563 | 22.4 |

**Table 23.** Day 14 individual and mean ( $\pm$ SD, %CV) pharmacokinetic parameters of the sulfone metabolite after oral 50 mg/kg/day of Fexinidazole in male Beagle dogs.

| Parameter                      | Units      | ID 2514 | ID 2521 | ID 2529 | Mean  | SD     | %CV  |
|--------------------------------|------------|---------|---------|---------|-------|--------|------|
| C <sub>max</sub>               | µg/mL      | 8.09    | 4.44    | 4.18    | 5.57  | 2.19   | 39.3 |
| t <sub>max</sub>               | hour       | 4       | 4       | 4       | 4     | 0      | 0    |
| AUC Interval                   | hour       | (0-24)  | (0-24)  | (0-24)  |       |        |      |
| AUC <sub>0-t(last)</sub>       | µg·hour/mL | 117     | 68.9    | 48.1    | 78    | 35.3   | 45.3 |
| C <sub>max</sub> /Dose         | µg/mL      | 0.162   | 0.0888  | 0.0836  | 0.111 | 0.0438 | 39.3 |
| AUC <sub>0-t(last)</sub> /Dose | µg·hour/mL | 2.35    | 1.38    | 0.961   | 1.56  | 0.712  | 45.6 |
| RA,C <sub>max</sub>            |            | 0.882   | 0.701   | 0.694   | 0.759 | 0.106  | 14   |
| RA,AUC <sub>0-t(last)</sub>    |            | 0.741   | 0.644   | 0.429   | 0.605 | 0.159  | 26.3 |

**Table 24.** Day 28 individual and mean ( $\pm$ SD, %CV) pharmacokinetic parameters of the sulfone metabolite after oral 50 mg/kg/day of Fexinidazole in male Beagle dogs.

| Parameter                      | Units      | ID 2514 | ID 2521 | ID 2529 | Mean  | SD     | %CV  |
|--------------------------------|------------|---------|---------|---------|-------|--------|------|
| C <sub>max</sub>               | µg/mL      | 8.43    | 6.87    | 6.04    | 7.11  | 1.21   | 17.1 |
| t <sub>max</sub>               | hour       | 8       | 8       | 8       | 8     | 0      | 0    |
| AUC Interval <sup>(1)</sup>    | hour       | (0-24)  | (0-24)  | (0-24)  |       |        |      |
| AUC <sub>0-t(last)</sub>       | µg·hour/mL | 139     | 123     | 101     | 121   | 19.1   | 15.8 |
| C <sub>max</sub> /Dose         | µg/mL      | 0.169   | 0.137   | 0.121   | 0.142 | 0.0244 | 17.2 |
| AUC <sub>0-t(last)</sub> /Dose | µg·hour/mL | 2.77    | 2.45    | 2.02    | 2.41  | 0.376  | 15.6 |
| RA,C <sub>max</sub>            |            | 0.919   | 1.09    | 1       | 1     | 0.083  | 8.3  |
| RA,AUC <sub>0-t(last)</sub>    |            | 0.88    | 1.15    | 0.902   | 0.977 | 0.15   | 15.3 |
| <sup>(1)</sup> Nominal time    |            |         |         |         |       |        |      |

**Table 25.** Day 1 individual and mean ( $\pm$ SD, %CV) pharmacokinetic parameters of the sulfone metabolite after oral 50 mg/kg/day of Fexinidazole in female Beagle dogs.

| Parameter                      | Units      | ID 2562 | ID 2563 | ID 2576 | Mean | SD     | %CV  |
|--------------------------------|------------|---------|---------|---------|------|--------|------|
| C <sub>max</sub>               | µg/mL      | 11.5    | 8.32    | 10.2    | 10   | 1.6    | 16   |
| t <sub>max</sub>               | hour       | 8       | 4       | 8       | 6.67 | 2.31   | 34.6 |
| AUC Interval                   | hour       | (0-24)  | (0-24)  | (0-24)  |      |        |      |
| AUC <sub>0-t(last)</sub>       | µg·hour/mL | 199     | 127     | 183     | 170  | 37.8   | 22.3 |
| C <sub>max</sub> /Dose         | µg/mL      | 0.23    | 0.166   | 0.204   | 0.2  | 0.0322 | 16.1 |
| AUC <sub>0-t(last)</sub> /Dose | µg·hour/mL | 3.97    | 2.54    | 3.66    | 3.39 | 0.752  | 22.2 |

**Table 26.** Day 14 individual and mean ( $\pm$ SD, %CV) pharmacokinetic parameters of the sulfone metabolite after oral 50 mg/kg/day of Fexinidazole in female Beagle dogs.

| Parameter                      | Units      | ID 2562 | ID 2563 | ID 2576 | Mean | SD     | %CV  |
|--------------------------------|------------|---------|---------|---------|------|--------|------|
| C <sub>max</sub>               | µg/mL      | 10.6    | 8.54    | 10.8    | 9.98 | 1.25   | 12.5 |
| t <sub>max</sub>               | hour       | 8       | 8       | 4       | 6.67 | 2.31   | 34.6 |
| AUC Interval                   | hour       | (0-24)  | (0-24)  | (0-24)  |      |        |      |
| AUC <sub>0-t(last)</sub>       | µg·hour/mL | 204     | 157     | 158     | 173  | 26.9   | 15.5 |
| C <sub>max</sub> /Dose         | µg/mL      | 0.212   | 0.171   | 0.216   | 0.2  | 0.0249 | 12.5 |
| AUC <sub>0-t(last)</sub> /Dose | µg·hour/mL | 4.08    | 3.13    | 3.16    | 3.46 | 0.54   | 15.6 |
| RA,C <sub>max</sub>            |            | 0.922   | 1.03    | 1.06    | 1    | 0.0717 | 7.1  |
| RA,AUC <sub>0-t(last)</sub>    |            | 1.03    | 1.24    | 0.863   | 1.04 | 0.187  | 17.9 |

**Table 27.** Day 28 individual and mean ( $\pm$ SD, %CV) pharmacokinetic parameters of the sulfone metabolite after oral 50 mg/kg/day of Fexinidazole in female Beagle dogs.

| Parameter                      | Units      | ID 2562 | ID 2563 | ID 2576 | Mean  | SD     | %CV  |
|--------------------------------|------------|---------|---------|---------|-------|--------|------|
| C <sub>max</sub>               | µg/mL      | 6.5     | 7.43    | 6.44    | 6.79  | 0.56   | 8.2  |
| t <sub>max</sub>               | hour       | 4       | 4       | 2       | 3.33  | 1.15   | 34.6 |
| AUC Interval <sup>(1)</sup>    | hour       | (0-24)  | (0-24)  | (0-24)  |       |        |      |
| AUC <sub>0-t(last)</sub>       | µg·hour/mL | 83.3    | 128     | 110     | 107   | 22.5   | 21   |
| C <sub>max</sub> /Dose         | µg/mL      | 0.13    | 0.149   | 0.129   | 0.136 | 0.0113 | 8.3  |
| AUC <sub>0-t(last)</sub> /Dose | µg·hour/mL | 1.67    | 2.56    | 2.2     | 2.14  | 0.448  | 20.9 |
| RA,C <sub>max</sub>            |            | 0.565   | 0.893   | 0.631   | 0.697 | 0.173  | 24.9 |
| RA,AUC <sub>0-t(last)</sub>    |            | 0.419   | 1.01    | 0.601   | 0.676 | 0.302  | 44.6 |
| <sup>(1)</sup> Nominal time    |            |         |         |         |       |        |      |

**Table 28.** Day 1 individual and mean ( $\pm$ SD, %CV) pharmacokinetic parameters of the sulfone metabolite after oral 200 mg/kg/day of Fexinidazole in male Beagle dogs.

| Parameter                      | Units      | ID 2515 | ID 2523 | ID 2526 | Mean   | SD     | %CV  |
|--------------------------------|------------|---------|---------|---------|--------|--------|------|
| C <sub>max</sub>               | µg/mL      | 16      | 16.4    | 19.1    | 17.2   | 1.69   | 9.8  |
| t <sub>max</sub>               | hour       | 24      | 8       | 8       | 13.3   | 9.24   | 69.3 |
| AUC Interval                   | hour       | (0-24)  | (0-24)  | (0-24)  |        |        |      |
| AUC <sub>0-t(last)</sub>       | µg·hour/mL | 295     | 325     | 394     | 338    | 50.8   | 15   |
| C <sub>max</sub> /Dose         | µg/mL      | 0.08    | 0.082   | 0.0955  | 0.0858 | 0.0084 | 9.8  |
| AUC <sub>0-t(last)</sub> /Dose | µg·hour/mL | 1.47    | 1.62    | 1.97    | 1.69   | 0.257  | 15.2 |

**Table 29.** Day 14 individual and mean ( $\pm$ SD, %CV) pharmacokinetic parameters of the sulfone metabolite after oral 200 mg/kg/day of Fexinidazole in male Beagle dogs.

| Parameter                      | Units      | ID 2515 | ID 2523 | ID 2526 | Mean | SD     | %CV  |
|--------------------------------|------------|---------|---------|---------|------|--------|------|
| C <sub>max</sub>               | µg/mL      | 15.6    | 24.2    | 26.1    | 22   | 5.59   | 25.5 |
| t <sub>max</sub>               | hour       | 8       | 4       | 4       | 5.33 | 2.31   | 43.3 |
| AUC Interval                   | hour       | (0-24)  | (0-24)  | (0-24)  |      |        |      |
| AUC <sub>0-t(last)</sub>       | µg·hour/mL | 336     | 389     | 435     | 387  | 49.5   | 12.8 |
| C <sub>max</sub> /Dose         | µg/mL      | 0.078   | 0.121   | 0.131   | 0.11 | 0.0282 | 25.6 |
| AUC <sub>0-t(last)</sub> /Dose | µg·hour/mL | 1.68    | 1.95    | 2.17    | 1.93 | 0.245  | 12.7 |
| RA, C <sub>max</sub>           |            | 0.975   | 1.48    | 1.37    | 1.27 | 0.263  | 20.7 |
| RA, AUC <sub>0-t(last)</sub>   |            | 1.14    | 1.2     | 1.1     | 1.15 | 0.0469 | 4.1  |

**Table 30.** Day 28 individual and mean ( $\pm$ SD, %CV) pharmacokinetic parameters of the sulfone metabolite after oral 200 mg/kg/day of Fexinidazole in male Beagle dogs.

| Parameter                      | Units      | ID 2515 | ID 2523 | ID 2526 | Mean  | SD     | %CV  |
|--------------------------------|------------|---------|---------|---------|-------|--------|------|
| C <sub>max</sub>               | µg/mL      | 13.3    | 11.1    | 17.6    | 14    | 3.31   | 23.6 |
| t <sub>max</sub>               | hour       | 8       | 4       | 0       | 4     | 4      | 100  |
| AUC Interval <sup>(1)</sup>    | hour       | (0-24)  | (0-24)  | (0-24)  |       |        |      |
| AUC <sub>0-t(last)</sub>       | µg·hour/mL | 256     | 211     | 307     | 258   | 48     | 18.6 |
| C <sub>max</sub> /Dose         | µg/mL      | 0.0665  | 0.0555  | 0.088   | 0.07  | 0.0165 | 23.6 |
| AUC <sub>0-t(last)</sub> /Dose | µg·hour/mL | 1.28    | 1.06    | 1.53    | 1.29  | 0.235  | 18.2 |
| RA, C <sub>max</sub>           |            | 0.831   | 0.677   | 0.921   | 0.81  | 0.124  | 15.3 |
| RA, AUC <sub>0-t(last)</sub>   |            | 0.868   | 0.649   | 0.779   | 0.765 | 0.11   | 14.4 |
| <sup>(1)</sup> Nominal time    |            |         |         |         |       |        |      |

**Table 31.** Day 1 individual and mean ( $\pm$ SD, %CV) pharmacokinetic parameters of the sulfone metabolite after oral 200 mg/kg/day of Fexinidazole in female Beagle dogs.

| Parameter                      | Units      | ID 2561 | ID 2567 | ID 2570 | Mean   | SD     | %CV  |
|--------------------------------|------------|---------|---------|---------|--------|--------|------|
| C <sub>max</sub>               | µg/mL      | 15.8    | 22      | 16.4    | 18.1   | 3.42   | 18.9 |
| t <sub>max</sub>               | hour       | 24      | 8       | 4       | 12     | 10.6   | 88.2 |
| AUC Interval                   | hour       | (0-24)  | (0-24)  | (0-24 ) |        |        |      |
| AUC <sub>0-t(last)</sub>       | µg·hour/mL | 318     | 456     | 299     | 358    | 85.7   | 24   |
| C <sub>max</sub> /Dose         | µg /mL     | 0.079   | 0.11    | 0.082   | 0.0903 | 0.0171 | 18.9 |
| AUC <sub>0-t(last)</sub> /Dose | µg·hour/mL | 1.59    | 2.28    | 1.5     | 1.79   | 0.427  | 23.8 |

**Table 32.** Day 14 individual and mean ( $\pm$ SD, %CV) pharmacokinetic parameters of the sulfone metabolite after oral 200 mg/kg/day of Fexinidazole in female Beagle dogs.

| Parameter                      | Units      | ID 2561 | ID 2567 | ID 2570 | Mean  | SD    | %CV  |
|--------------------------------|------------|---------|---------|---------|-------|-------|------|
| C <sub>max</sub>               | µg/mL      | 19.3    | 24.1    | 21.2    | 21.5  | 2.42  | 11.2 |
| t <sub>max</sub>               | hour       | 4       | 8       | 4       | 5.33  | 2.31  | 43.3 |
| AUC Interval                   | hour       | (0-24)  | (0-24)  | (0-24)  |       |       |      |
| AUC <sub>0-t(last)</sub>       | µg·hour/mL | 312     | 428     | 404     | 381   | 61.2  | 16.1 |
| C <sub>max</sub> /Dose         | µg/mL      | 0.0965  | 0.121   | 0.106   | 0.108 | 0.012 | 11.5 |
| AUC <sub>0-t(last)</sub> /Dose | µg·hour/mL | 1.56    | 2.14    | 2.02    | 1.91  | 0.306 | 16.1 |
| RA,C <sub>max</sub>            |            | 1.22    | 1.1     | 1.29    | 1.2   | 0.1   | 8.3  |
| RA,AUC <sub>0-t(last)</sub>    |            | 0.981   | 0.939   | 1.35    | 1.09  | 0.227 | 20.8 |

**Table 33.** Day 28 individual and mean ( $\pm$ SD, %CV) pharmacokinetic parameters of the sulfone metabolite after oral 200 mg/kg/day of Fexinidazole in female Beagle dogs.

| Parameter                      | Units      | ID 2561 | ID 2567 | ID 2570 | Mean   | SD     | %CV  |
|--------------------------------|------------|---------|---------|---------|--------|--------|------|
| C <sub>max</sub>               | µg/mL      | 17.9    | 12.6    | 15.6    | 15.4   | 2.66   | 17.3 |
| t <sub>max</sub>               | hour       | 8       | 4       | 23.18   | 11.7   | 10.1   | 86.3 |
| AUC Interval <sup>(1)</sup>    | hour       | (0-24)  | (0-24)  | (0-24)  |        |        |      |
| AUC <sub>0-t(last)</sub>       | µg·hour/mL | 309     | 250     | 271     | 277    | 29.9   | 10.8 |
| C <sub>max</sub> /Dose         | µg/mL      | 0.0895  | 0.063   | 0.078   | 0.0768 | 0.0133 | 17.3 |
| AUC <sub>0-t(last)</sub> /Dose | µg·hour/mL | 1.55    | 1.25    | 1.36    | 1.39   | 0.152  | 10.9 |
| RA,C <sub>max</sub>            |            | 1.13    | 0.573   | 0.951   | 0.886  | 0.286  | 32.3 |
| RA,AUC <sub>0-t(last)</sub>    |            | 0.972   | 0.548   | 0.906   | 0.809  | 0.228  | 28.2 |
| <sup>(1)</sup> Nominal time    |            |         |         |         |        |        |      |



**Table 34.** Day 1 individual and mean ( $\pm$ SD, %CV) pharmacokinetic parameters of the sulfone metabolite after oral 800 mg/kg/day of Fexinidazole in male Beagle dogs.

| Parameter                      | Units                            | Dog ID |        |        |        |        | Mean  | SD     | %CV  |
|--------------------------------|----------------------------------|--------|--------|--------|--------|--------|-------|--------|------|
|                                |                                  | 2517   | 2519   | 2525   | 2528   | 2530   |       |        |      |
| $C_{max}$                      | $\mu\text{g/mL}$                 | 39.8   | 37.2   | 43     | 36.4   | 36.5   | 38.6  | 2.83   | 7.3  |
| $t_{max}$                      | hour                             | 24     | 8      | 24     | 24     | 8      | 17.6  | 8.76   | 49.8 |
| AUC Interval                   | hour                             | (0-24) | (0-24) | (0-24) | (0-24) | (0-24) |       |        |      |
| AUC <sub>0-t(last)</sub>       | $\mu\text{g}\cdot\text{hour/mL}$ | 769    | 544    | 778    | 731    | 703    | 705   | 94.9   | 13.5 |
| $C_{max}/\text{Dose}$          | $\mu\text{g/mL}$                 | 0.0498 | 0.0465 | 0.0538 | 0.0455 | 0.0456 | 0.048 | 0.0036 | 7.4  |
| AUC <sub>0-t(last)</sub> /Dose | $\mu\text{g}\cdot\text{hour/mL}$ | 0.962  | 0.68   | 0.972  | 0.914  | 0.878  | 0.881 | 0.119  | 13.5 |

**Table 35.** Day 14 individual and mean ( $\pm$ SD, %CV) pharmacokinetic parameters of the sulfone metabolite after oral 800 mg/kg/day of Fexinidazole in male Beagle dogs.

| Parameter                      | Units                            | Dog ID |        |        |        |        | Mean  | SD     | %CV  |
|--------------------------------|----------------------------------|--------|--------|--------|--------|--------|-------|--------|------|
|                                |                                  | 2517   | 2519   | 2525   | 2528   | 2530   |       |        |      |
| $C_{max}$                      | $\mu\text{g/mL}$                 | 33.8   | 25.3   | 29.8   | 42.5   | 41.5   | 34.6  | 7.42   | 21.5 |
| $t_{max}$                      | hour                             | 4      | 4      | 4      | 8      | 8      | 5.6   | 2.19   | 39.1 |
| AUC Interval                   | hour                             | (0-24) | (0-24) | (0-24) | (0-24) | (0-24) |       |        |      |
| AUC <sub>0-t(last)</sub>       | $\mu\text{g}\cdot\text{hour/mL}$ | 675    | 431    | 514    | 807    | 771    | 640   | 163    | 25.4 |
| $C_{max}/\text{Dose}$          | $\mu\text{g/mL}$                 | 0.0423 | 0.0316 | 0.0373 | 0.0531 | 0.0519 | 0.043 | 0.0093 | 21.4 |
| AUC <sub>0-t(last)</sub> /Dose | $\mu\text{g}\cdot\text{hour/mL}$ | 0.844  | 0.539  | 0.643  | 1.01   | 0.964  | 0.8   | 0.204  | 25.4 |
| RA, $C_{max}$                  |                                  | 0.849  | 0.68   | 0.693  | 1.17   | 1.14   | 0.905 | 0.235  | 26   |
| RA,AUC <sub>0-t(last)</sub>    |                                  | 0.878  | 0.792  | 0.661  | 1.1    | 1.1    | 0.906 | 0.193  | 21.3 |

**Table 36.** Day 28 individual and mean ( $\pm$ SD, %CV) pharmacokinetic parameters of the sulfone metabolite after oral 800 mg/kg/day of Fexinidazole in male Beagle dogs.

| Parameter                      | Units                            | Dog ID |        |        |        |        | Mean  | SD     | %CV  |
|--------------------------------|----------------------------------|--------|--------|--------|--------|--------|-------|--------|------|
|                                |                                  | 2517   | 2519   | 2525   | 2528   | 2530   |       |        |      |
| $C_{max}$                      | $\mu\text{g/mL}$                 | 21.4   | 16     | 20     | 27.3   | 19.3   | 20.8  | 4.14   | 19.9 |
| $t_{max}$                      | hour                             | 23     | 23     | 4      | 8      | 4      | 12.4  | 9.81   | 79.1 |
| AUC Interval <sup>(1)</sup>    | hour                             | (0-24) | (0-24) | (0-24) | (0-72) | (0-72) |       |        |      |
| AUC <sub>0-24</sub>            | $\mu\text{g}\cdot\text{hour/mL}$ | 448    | 282    | 405    | 441    | 362    | 388   | 68.2   | 17.6 |
| AUC <sub>0-t(last)</sub>       | $\mu\text{g}\cdot\text{hour/mL}$ |        |        |        | 580    | 621    | 601   | 29     | 4.8  |
| $C_{max}/\text{Dose}$          | $\mu\text{g/mL}$                 | 0.0268 | 0.02   | 0.025  | 0.0341 | 0.0241 | 0.026 | 0.0052 | 19.9 |
| AUC <sub>0-24</sub> /Dose      | $\mu\text{g}\cdot\text{hour/mL}$ | 0.561  | 0.352  | 0.506  | 0.551  | 0.453  | 0.485 | 0.0857 | 17.7 |
| AUC <sub>0-t(last)</sub> /Dose | $\mu\text{g}\cdot\text{hour/mL}$ |        |        |        | 0.725  | 0.776  | 0.751 | 0.0361 | 4.8  |
| $t_{1/2,z}$                    | hour                             |        |        |        | 6.2    | 7.16   | 6.68  | 0.679  | 10.2 |
| RA, $C_{max}$                  |                                  | 0.538  | 0.43   | 0.465  | 0.75   | 0.529  | 0.542 | 0.124  | 22.9 |
| RA,AUC <sub>0-24</sub>         |                                  | 0.583  | 0.518  | 0.521  | 0.603  | 0.515  | 0.548 | 0.0418 | 7.6  |

<sup>(1)</sup> Nominal time**Table 37.** Day 1 individual and mean ( $\pm$ SD, %CV) pharmacokinetic parameters of the sulfone metabolite after oral 800 mg/kg/day of Fexinidazole in female Beagle dogs.

| Parameter                      | Units      | Dog ID |        |        |        |        | Mean  | SD     | %CV  |
|--------------------------------|------------|--------|--------|--------|--------|--------|-------|--------|------|
|                                |            | 2564   | 2565   | 2569   | 2571   | 2573   |       |        |      |
| C <sub>max</sub>               | µg/mL      | 35     | 44.9   | 43.1   | 23.8   | 21.1   | 33.6  | 10.9   | 32.4 |
| t <sub>max</sub>               | hour       | 8      | 8      | 8      | 24     | 8      | 11.2  | 7.16   | 63.9 |
| AUC Interval                   | hour       | (0-24) | (0-24) | (0-24) | (0-24) | (0-24) |       |        |      |
| AUC <sub>0-t(last)</sub>       | µg·hour/mL | 592    | 848    | 811    | 481    | 340    | 614   | 216    | 35.2 |
| C <sub>max</sub> /Dose         | µg/mL      | 0.0438 | 0.0561 | 0.0539 | 0.0298 | 0.0264 | 0.042 | 0.0136 | 32.3 |
| AUC <sub>0-t(last)</sub> /Dose | µg·hour/mL | 0.74   | 1.06   | 1.01   | 0.601  | 0.425  | 0.767 | 0.269  | 35.1 |

**Table 38.** Day 14 individual and mean ( $\pm$ SD, %CV) pharmacokinetic parameters of the sulfone metabolite after oral 800 mg/kg/day of Fexinidazole in female Beagle dogs.

| Parameter                      | Units      | ID     |        |        |        |        | Mean  | SD     | %CV  |
|--------------------------------|------------|--------|--------|--------|--------|--------|-------|--------|------|
|                                |            | 2564   | 2565   | 2569   | 2571   | 2573   |       |        |      |
| C <sub>max</sub>               | µg/mL      | 37.3   | 47     | 36.1   | 37.2   | 35.6   | 38.6  | 4.73   | 12.2 |
| t <sub>max</sub>               | hour       | 8      | 8      | 8      | 8      | 8      | 8     | 0      | 0    |
| AUC Interval                   | hour       | (0-24) | (0-24) | (0-24) | (0-24) | (0-24) |       |        |      |
| AUC <sub>0-t(last)</sub>       | µg·hour/mL | 696    | 766    | 641    | 586    | 645    | 667   | 67.8   | 10.2 |
| C <sub>max</sub> /Dose         | µg/mL      | 0.0466 | 0.0588 | 0.0451 | 0.0465 | 0.0445 | 0.048 | 0.0059 | 12.3 |
| AUC <sub>0-t(last)</sub> /Dose | µg·hour/mL | 0.87   | 0.957  | 0.802  | 0.733  | 0.806  | 0.834 | 0.0843 | 10.1 |
| RA,C <sub>max</sub>            |            | 1.07   | 1.05   | 0.838  | 1.56   | 1.69   | 1.24  | 0.365  | 29.5 |
| RA,AUC <sub>0-t(last)</sub>    |            | 1.18   | 0.903  | 0.79   | 1.22   | 1.9    | 1.2   | 0.431  | 36   |

**Table 39.** Day 28 individual and mean ( $\pm$ SD, %CV) pharmacokinetic parameters of the sulfone metabolite after oral 800 mg/kg/day of Fexinidazole in female Beagle dogs.

| Parameter                      | Units      | Dog ID |        |        |        |        | Mean  | SD     | %CV  |
|--------------------------------|------------|--------|--------|--------|--------|--------|-------|--------|------|
|                                |            | 2564   | 2565   | 2569   | 2571   | 2573   |       |        |      |
| C <sub>max</sub>               | µg/mL      | 18.2   | 36.2   | 28.6   | 28.5   | 18.3   | 26    | 7.7    | 29.7 |
| t <sub>max</sub>               | hour       | 4      | 8      | 8      | 8      | 8      | 7.2   | 1.79   | 24.8 |
| AUC Interval <sup>(1)</sup>    | hour       | (0-24) | (0-24) | (0-24) | (0-72) | (0-72) |       |        |      |
| AUC <sub>0-24</sub>            | µg·hour/mL | 353    | 691    | 516    | 493    | 331    | 477   | 145    | 30.4 |
| AUC <sub>0-t(last)</sub>       | µg·hour/mL |        |        |        | 941    | 445    | 693   | 351    | 50.6 |
| C <sub>max</sub> /Dose         | µg/mL      | 0.0228 | 0.0453 | 0.0358 | 0.0356 | 0.0229 | 0.033 | 0.0096 | 29.6 |
| AUC <sub>0-24</sub> /Dose      | µg·hour/mL | 0.442  | 0.863  | 0.646  | 0.616  | 0.414  | 0.596 | 0.181  | 30.4 |
| AUC <sub>0-t(last)</sub> /Dose | µg·hour/mL |        |        |        | 1.18   | 0.556  | 0.868 | 0.441  | 50.8 |
| t <sub>1/2,z</sub>             | hour       |        |        |        | 8.24   | 7.27   | 7.76  | 0.686  | 8.8  |
| RA,C <sub>max</sub>            |            | 0.52   | 0.806  | 0.664  | 1.2    | 0.867  | 0.811 | 0.254  | 31.4 |
| RA,AUC <sub>0-24</sub>         |            | 0.596  | 0.815  | 0.636  | 1.02   | 0.974  | 0.809 | 0.193  | 23.8 |
| <sup>(1)</sup> Nominal time    |            |        |        |        |        |        |       |        |      |

**Table 40.** Day 1 individual and mean ( $\pm$ SD, %CV) pharmacokinetic parameters of the sulfoxide metabolite after oral 50 mg/kg/day of Fexinidazole in male Beagle dogs.

| Parameter                      | Units      | ID 2514 | ID 2521 | ID 2529 | Mean  | SD     | %CV  |
|--------------------------------|------------|---------|---------|---------|-------|--------|------|
| C <sub>max</sub>               | µg/mL      | 5.04    | 2.65    | 2.95    | 3.55  | 1.3    | 36.7 |
| t <sub>max</sub>               | hour       | 1       | 1       | 1       | 1     | 0      | 0    |
| AUC Interval                   | hour       | (0-24)  | (0-24)  | (0-24)  |       |        |      |
| AUC <sub>0-t(last)</sub>       | µg·hour/mL | 25.7    | 17.6    | 14.4    | 19.2  | 5.82   | 30.3 |
| C <sub>max</sub> /Dose         | µg/mL      | 0.101   | 0.053   | 0.059   | 0.071 | 0.0262 | 36.8 |
| AUC <sub>0-t(last)</sub> /Dose | µg·hour/mL | 0.514   | 0.352   | 0.287   | 0.384 | 0.117  | 30.4 |

**Table 41.** Day 14 individual and mean ( $\pm$ SD, %CV) pharmacokinetic parameters of the sulfoxide metabolite after oral 50 mg/kg/day of Fexinidazole in male Beagle dogs.

| Parameter                      | Units      | ID 2514 | ID 2521 | ID 2529 | Mean   | SD      | %CV  |
|--------------------------------|------------|---------|---------|---------|--------|---------|------|
| C <sub>max</sub>               | µg/mL      | 2.76    | 2.06    | 1.91    | 2.24   | 0.454   | 20.2 |
| t <sub>max</sub>               | hour       | 1       | 1       | 1       | 1      | 0       | 0    |
| AUC Interval                   | hour       | (0-8)   | (0-24)  | (0-8)   |        |         |      |
| AUC <sub>0-t(last)</sub>       | µg·hour/mL | 10.8    | 8.93    | 5.79    | 8.51   | 2.53    | 29.8 |
| C <sub>max</sub> /Dose         | µg/mL      | 0.0552  | 0.0412  | 0.0382  | 0.0449 | 0.00907 | 20.2 |
| AUC <sub>0-t(last)</sub> /Dose | µg·hour/mL | 0.217   | 0.179   | 0.116   | 0.171  | 0.051   | 29.9 |
| RA,C <sub>max</sub>            |            | 0.548   | 0.777   | 0.647   | 0.657  | 0.115   | 17.5 |
| RA,AUC <sub>0-t(last)</sub>    |            | 0.42    | 0.507   | 0.402   | 0.443  | 0.0563  | 12.7 |

**Table 42.** Day 28 individual and mean ( $\pm$ SD, %CV) pharmacokinetic parameters of the sulfoxide metabolite after oral 50 mg/kg/day of Fexinidazole in male Beagle dogs.

| Parameter                      | Units      | ID 2514 | ID 2521 | ID 2529 | Mean   | SD     | %CV  |
|--------------------------------|------------|---------|---------|---------|--------|--------|------|
| C <sub>max</sub>               | µg/mL      | 2.48    | 1.44    | 1.57    | 1.83   | 0.567  | 31   |
| t <sub>max</sub>               | hour       | 2       | 1       | 2       | 1.67   | 0.577  | 34.6 |
| AUC Interval <sup>(1)</sup>    | hour       | (0-24)  | (0-24)  | (0-24)  |        |        |      |
| AUC <sub>0-t(last)</sub>       | µg·hour/mL | 15.9    | 15.7    | 11.1    | 14.2   | 2.72   | 19.1 |
| C <sub>max</sub> /Dose         | µg/mL      | 0.0496  | 0.0288  | 0.0314  | 0.0366 | 0.0113 | 31   |
| AUC <sub>0-t(last)</sub> /Dose | µg·hour/mL | 0.318   | 0.314   | 0.221   | 0.284  | 0.0549 | 19.3 |
| RA,C <sub>max</sub>            |            | 0.492   | 0.543   | 0.532   | 0.523  | 0.027  | 5.2  |
| RA,AUC <sub>0-t(last)</sub>    |            | 0.619   | 0.892   | 0.771   | 0.761  | 0.137  | 18   |
| <sup>(1)</sup> Nominal time    |            |         |         |         |        |        |      |

**Table 43.** Day 1 individual and mean ( $\pm$ SD, %CV) pharmacokinetic parameters of the sulfoxide metabolite after oral 50 mg/kg/day of Fexinidazole in female Beagle dogs.

| Parameter                      | Units      | ID 2562 | ID 2563 | ID 2576 | Mean   | SD     | %CV  |
|--------------------------------|------------|---------|---------|---------|--------|--------|------|
| C <sub>max</sub>               | µg/mL      | 3.6     | 4.82    | 3.49    | 3.97   | 0.738  | 18.6 |
| t <sub>max</sub>               | hour       | 2       | 1       | 1       | 1.33   | 0.577  | 43.3 |
| AUC Interval                   | hour       | (0-24)  | (0-8)   | (0-24)  |        |        |      |
| AUC <sub>0-t(last)</sub>       | µg·hour/mL | 26.2    | 12.7    | 21      | 20     | 6.81   | 34.1 |
| C <sub>max</sub> /Dose         | µg/mL      | 0.072   | 0.0964  | 0.0698  | 0.0794 | 0.0148 | 18.6 |
| AUC <sub>0-t(last)</sub> /Dose | µg·hour/mL | 0.524   | 0.255   | 0.42    | 0.4    | 0.136  | 33.9 |

**Table 44.** Day 14 individual and mean ( $\pm$ SD, %CV) pharmacokinetic parameters of the sulfoxide metabolite after oral 50 mg/kg/day of Fexinidazole in female Beagle dogs.

| Parameter                      | Units      | ID 2562 | ID 2563 | ID 2576 | Mean   | SD     | %CV  |
|--------------------------------|------------|---------|---------|---------|--------|--------|------|
| C <sub>max</sub>               | µg/mL      | 3.12    | 3.53    | 4.53    | 3.73   | 0.725  | 19.5 |
| t <sub>max</sub>               | hour       | 1       | 2       | 2       | 1.67   | 0.577  | 34.6 |
| AUC Interval                   | hour       | (0-24)  | (0-24)  | (0-8)   |        |        |      |
| AUC <sub>0-t(last)</sub>       | µg·hour/mL | 21.1    | 17.2    | 18      | 18.8   | 2.06   | 11   |
| C <sub>max</sub> /Dose         | µg/mL      | 0.0624  | 0.0706  | 0.0906  | 0.0745 | 0.0145 | 19.5 |
| AUC <sub>0-t(last)</sub> /Dose | µg·hour/mL | 0.421   | 0.344   | 0.36    | 0.375  | 0.0406 | 10.8 |
| RA, C <sub>max</sub>           |            | 0.867   | 0.732   | 1.3     | 0.966  | 0.296  | 30.6 |
| RA, AUC <sub>0-t(last)</sub>   |            | 0.805   | 1.35    | 0.857   | 1.01   | 0.303  | 30.1 |

**Table 45.** Day 28 individual and mean ( $\pm$ SD, %CV) pharmacokinetic parameters of the sulfoxide metabolite after oral 50 mg/kg/day of Fexinidazole in female Beagle dogs.

| Parameter                      | Units      | ID 2562 | ID 2563 | ID 2576 | Mean   | SD     | %CV  |
|--------------------------------|------------|---------|---------|---------|--------|--------|------|
| C <sub>max</sub>               | µg/mL      | 1.91    | 2.91    | 3.33    | 2.72   | 0.729  | 26.9 |
| t <sub>max</sub>               | hour       | 1       | 1       | 1       | 1      | 0      | 0    |
| AUC Interval <sup>(1)</sup>    | hour       | (0-24)  | (0-24)  | (0-24)  |        |        |      |
| AUC <sub>0-t(last)</sub>       | µg·hour/mL | 6.93    | 12.3    | 10.4    | 9.88   | 2.72   | 27.6 |
| C <sub>max</sub> /Dose         | µg/mL      | 0.0382  | 0.0582  | 0.0666  | 0.0543 | 0.0146 | 26.9 |
| AUC <sub>0-t(last)</sub> /Dose | µg·hour/mL | 0.139   | 0.245   | 0.207   | 0.197  | 0.0537 | 27.3 |
| RA, C <sub>max</sub>           |            | 0.531   | 0.604   | 0.954   | 0.696  | 0.226  | 32.5 |
| RA, AUC <sub>0-t(last)</sub>   |            | 0.265   | 0.969   | 0.495   | 0.576  | 0.359  | 62.3 |
| <sup>(1)</sup> Nominal time    |            |         |         |         |        |        |      |

**Table 46.** Day 1 individual and mean ( $\pm$ SD, %CV) pharmacokinetic parameters of the sulfoxide metabolite after oral 200 mg/kg/day of Fexinidazole in male Beagle dogs.

| Parameter                      | Units      | ID 2515 | ID 2523 | ID 2526 | Mean   | SD     | %CV  |
|--------------------------------|------------|---------|---------|---------|--------|--------|------|
| C <sub>max</sub>               | µg/mL      | 6.37    | 7.97    | 8.3     | 7.55   | 1.03   | 13.7 |
| t <sub>max</sub>               | hour       | 1       | 2       | 2       | 1.67   | 0.58   | 34.6 |
| AUC Interval                   | hour       | (0-24)  | (0-24)  | (0-24)  |        |        |      |
| AUC <sub>0-t(last)</sub>       | µg·hour/mL | 44.5    | 47      | 60.5    | 50.7   | 8.61   | 17   |
| C <sub>max</sub> /Dose         | µg/mL      | 0.0319  | 0.0399  | 0.0415  | 0.0378 | 0.0051 | 13.6 |
| AUC <sub>0-t(last)</sub> /Dose | µg·hour/mL | 0.223   | 0.235   | 0.302   | 0.253  | 0.0426 | 16.8 |

**Table 47.** Day 14 individual and mean ( $\pm$ SD, %CV) pharmacokinetic parameters of the sulfoxide metabolite after oral 200 mg/kg/day of Fexinidazole in male Beagle dogs.

| Parameter                      | Units      | ID 2515 | ID 2523 | ID 2526 | Mean   | SD     | %CV  |
|--------------------------------|------------|---------|---------|---------|--------|--------|------|
| C <sub>max</sub>               | µg/mL      | 6.97    | 11.8    | 8.1     | 8.96   | 2.53   | 28.2 |
| t <sub>max</sub>               | hour       | 2       | 2       | 2       | 2      | 0      | 0    |
| AUC Interval                   | hour       | (0-24)  | (0-24)  | (0-24)  |        |        |      |
| AUC <sub>0-t(last)</sub>       | µg·hour/mL | 57.4    | 65.4    | 45.6    | 56.1   | 9.96   | 17.7 |
| C <sub>max</sub> /Dose         | µg/mL      | 0.0349  | 0.059   | 0.0405  | 0.0448 | 0.0126 | 28.2 |
| AUC <sub>0-t(last)</sub> /Dose | µg·hour/mL | 0.287   | 0.327   | 0.228   | 0.281  | 0.0498 | 17.7 |
| RA, C <sub>max</sub>           |            | 1.09    | 1.48    | 0.976   | 1.18   | 0.264  | 22.3 |
| RA, AUC <sub>0-t(last)</sub>   |            | 1.29    | 1.39    | 0.754   | 1.15   | 0.343  | 29.9 |

**Table 48.** Day 28 individual and mean ( $\pm$ SD, %CV) pharmacokinetic parameters of the sulfoxide metabolite after oral 200 mg/kg/day of Fexinidazole in male Beagle dogs.

| Parameter                      | Units      | ID 2515 | ID 2523 | ID 2526 | Mean   | SD     | %CV  |
|--------------------------------|------------|---------|---------|---------|--------|--------|------|
| C <sub>max</sub>               | µg/mL      | 6.96    | 5.7     | 4.62    | 5.76   | 1.17   | 20.3 |
| t <sub>max</sub>               | hour       | 1       | 2       | 1       | 1.33   | 0.58   | 43.3 |
| AUC Interval <sup>(1)</sup>    | hour       | (0-24)  | (0-24)  | (0-24)  |        |        |      |
| AUC <sub>0-t(last)</sub>       | µg·hour/mL | 44.7    | 47.1    | 34.9    | 42.2   | 6.46   | 15.3 |
| C <sub>max</sub> /Dose         | µg/mL      | 0.0348  | 0.0285  | 0.0231  | 0.0288 | 0.0059 | 20.3 |
| AUC <sub>0-t(last)</sub> /Dose | µg·hour/mL | 0.224   | 0.235   | 0.174   | 0.211  | 0.0325 | 15.4 |
| RA, C <sub>max</sub>           |            | 1.09    | 0.715   | 0.557   | 0.788  | 0.275  | 34.9 |
| RA, AUC <sub>0-t(last)</sub>   |            | 1       | 1       | 0.577   | 0.861  | 0.246  | 28.6 |
| <sup>(1)</sup> Nominal time    |            |         |         |         |        |        |      |

**Table 49.** Day 1 individual and mean ( $\pm$ SD, %CV) pharmacokinetic parameters of the sulfoxide metabolite after oral 200 mg/kg/day of Fexinidazole in female Beagle dogs.

| Parameter                      | Units      | ID 2561 | ID 2567 | ID 2570 | Mean   | SD     | %CV  |
|--------------------------------|------------|---------|---------|---------|--------|--------|------|
| C <sub>max</sub>               | µg/mL      | 4.92    | 12.8    | 8.38    | 8.7    | 3.95   | 45.4 |
| t <sub>max</sub>               | hour       | 0.5     | 1       | 1       | 0.833  | 0.289  | 34.6 |
| AUC Interval                   | hour       | (0-24)  | (0-24)  | (0-24)  |        |        |      |
| AUC <sub>0-t(last)</sub>       | µg·hour/mL | 39.4    | 75.8    | 41      | 52.1   | 20.6   | 39.5 |
| C <sub>max</sub> /Dose         | µg/mL      | 0.0246  | 0.064   | 0.0419  | 0.0435 | 0.0197 | 45.4 |
| AUC <sub>0-t(last)</sub> /Dose | µg·hour/mL | 0.197   | 0.379   | 0.205   | 0.26   | 0.103  | 39.5 |

**Table 50.** Day 14 individual and mean ( $\pm$ SD, %CV) pharmacokinetic parameters of the sulfoxide metabolite after oral 200 mg/kg/day of Fexinidazole in female Beagle dogs.

| Parameter                      | Units      | ID 2561 | ID 2567 | ID 2570 | Mean   | SD     | %CV  |
|--------------------------------|------------|---------|---------|---------|--------|--------|------|
| C <sub>max</sub>               | µg/mL      | 5.32    | 12.7    | 9.03    | 9.02   | 3.69   | 40.9 |
| t <sub>max</sub>               | hour       | 2       | 2       | 2       | 2      | 0      | 0    |
| AUC Interval                   | hour       | (0-24)  | (0-24)  | (0-24)  |        |        |      |
| AUC <sub>0-t(last)</sub>       | µg·hour/mL | 31.7    | 80.1    | 59.8    | 57.2   | 24.3   | 42.5 |
| C <sub>max</sub> /Dose         | µg/mL      | 0.0266  | 0.0635  | 0.0452  | 0.0451 | 0.0185 | 40.9 |
| AUC <sub>0-t(last)</sub> /Dose | µg·hour/mL | 0.159   | 0.401   | 0.299   | 0.286  | 0.121  | 42.4 |
| RA, C <sub>max</sub>           |            | 1.08    | 0.992   | 1.08    | 1.05   | 0.0504 | 4.8  |
| RA, AUC <sub>0-t(last)</sub>   |            | 0.805   | 1.06    | 1.46    | 1.11   | 0.33   | 29.8 |

**Table 51.** Day 28 individual and mean ( $\pm$ SD, %CV) pharmacokinetic parameters of the sulfoxide metabolite after oral 200 mg/kg/day of Fexinidazole in female Beagle dogs.

| Parameter                      | Units      | ID 2561 | ID 2567 | ID 2570 | Mean  | SD      | %CV  |
|--------------------------------|------------|---------|---------|---------|-------|---------|------|
| C <sub>max</sub>               | µg/mL      | 5.41    | 5.78    | 5.1     | 5.43  | 0.34    | 6.3  |
| t <sub>max</sub>               | hour       | 1       | 1       | 1       | 1     | 0       | 0    |
| AUC Interval <sup>(1)</sup>    | hour       | (0-24)  | (0-24)  | (0-24)  |       |         |      |
| AUC <sub>0-t(last)</sub>       | µg·hour/mL | 31.9    | 34.6    | 34.9    | 33.8  | 1.65    | 4.9  |
| C <sub>max</sub> /Dose         | µg/mL      | 0.0271  | 0.0289  | 0.0255  | 0.027 | 0.0017  | 6.3  |
| AUC <sub>0-t(last)</sub> /Dose | µg·hour/mL | 0.16    | 0.173   | 0.174   | 0.169 | 0.00781 | 4.6  |
| RA, C <sub>max</sub>           |            | 1.1     | 0.452   | 0.609   | 0.72  | 0.338   | 47   |
| RA, AUC <sub>0-t(last)</sub>   |            | 0.81    | 0.456   | 0.851   | 0.706 | 0.217   | 30.7 |
| <sup>(1)</sup> Nominal time    |            |         |         |         |       |         |      |

**Table 52.** Day 1 individual and mean ( $\pm$ SD, %CV) pharmacokinetic parameters of the sulfoxide metabolite after oral 800 mg/kg/day of Fexinidazole in male Beagle dogs.

| Parameter                      | Units      | Dog ID |        |        |        |        | Mean  | SD      | %CV  |
|--------------------------------|------------|--------|--------|--------|--------|--------|-------|---------|------|
|                                |            | 2517   | 2519   | 2525   | 2528   | 2530   |       |         |      |
| C <sub>max</sub>               | µg/mL      | 17.5   | 15.2   | 9.39   | 11.1   | 13.7   | 13.4  | 3.22    | 24.1 |
| t <sub>max</sub>               | hour       | 0.5    | 2      | 2      | 2      | 1      | 1.5   | 0.707   | 47.1 |
| AUC Interval                   | hour       | (0-24) | (0-24) | (0-24) | (0-24) | (0-24) |       |         |      |
| AUC <sub>0-t(last)</sub>       | µg·hour/mL | 89.7   | 95     | 105    | 114    | 115    | 104   | 11.3    | 10.9 |
| C <sub>max</sub> /Dose         | µg/mL      | 0.0219 | 0.019  | 0.0117 | 0.0139 | 0.0171 | 0.017 | 0.00404 | 24.2 |
| AUC <sub>0-t(last)</sub> /Dose | µg·hour/mL | 0.112  | 0.119  | 0.131  | 0.143  | 0.144  | 0.13  | 0.0142  | 11   |

**Table 53.** Day 14 individual and mean ( $\pm$ SD, %CV) pharmacokinetic parameters of the sulfoxide metabolite after oral 800 mg/kg/day of Fexinidazole in male Beagle dogs.

| Parameter                      | Units      | Dog ID |        |         |        |        | Mean  | SD      | %CV  |
|--------------------------------|------------|--------|--------|---------|--------|--------|-------|---------|------|
|                                |            | 2517   | 2519   | 2525    | 2528   | 2530   |       |         |      |
| C <sub>max</sub>               | µg/mL      | 12.8   | 14.9   | 7.56    | 13.9   | 13.1   | 12.5  | 2.85    | 22.9 |
| t <sub>max</sub>               | hour       | 1      | 1      | 1       | 1      | 2      | 1.2   | 0.4472  | 37.3 |
| AUC Interval                   | hour       | (0-24) | (0-24) | (0-24)  | (0-24) | (0-24) |       |         |      |
| AUC <sub>0-t(last)</sub>       | µg·hour/mL | 116    | 77.5   | 69      | 160    | 144    | 113   | 39.9    | 35.2 |
| C <sub>max</sub> /Dose         | µg/mL      | 0.016  | 0.0186 | 0.00945 | 0.0174 | 0.0164 | 0.016 | 0.00357 | 22.9 |
| AUC <sub>0-t(last)</sub> /Dose | µg·hour/mL | 0.145  | 0.0969 | 0.0863  | 0.200  | 0.18   | 0.142 | 0.0499  | 35.2 |
| RA, C <sub>max</sub>           |            | 0.731  | 0.98   | 0.805   | 1.25   | 0.956  | 0.945 | 0.201   | 21.2 |
| RA, AUC <sub>0-t(last)</sub>   |            | 1.29   | 0.816  | 0.657   | 1.4    | 1.25   | 1.08  | 0.327   | 30.2 |

**Table 54.** Day 28 individual and mean ( $\pm$ SD, %CV) pharmacokinetic parameters of the sulfoxide metabolite after oral 800 mg/kg/day of Fexinidazole in male Beagle dogs.

| Parameter                      | Units      | Dog ID |         |        |        |        | Mean   | SD      | %CV  |
|--------------------------------|------------|--------|---------|--------|--------|--------|--------|---------|------|
|                                |            | 2517   | 2519    | 2525   | 2528   | 2530   |        |         |      |
| C <sub>max</sub>               | µg/mL      | 15.1   | 6.19    | 8.2    | 7.04   | 10.2   | 9.35   | 3.55    | 38   |
| t <sub>max</sub>               | hour       | 1      | 2       | 1      | 2      | 2      | 1.6    | 0.548   | 34.2 |
| AUC Interval <sup>(1)</sup>    | hour       | (0-24) | (0-24)  | (0-24) | (0-48) | (0-48) |        |         |      |
| AUC <sub>0-24</sub>            | µg·hour/mL | 87.3   | 59.8    | 57.6   | 84.1   | 82.8   | 74.3   | 14.4    | 19.3 |
| AUC <sub>0-t(last)</sub>       | µg·hour/mL |        |         |        | 97.3   | 144    | 121    | 33      | 27.4 |
| C <sub>max</sub> /Dose         |            | 0.0189 | 0.00774 | 0.0103 | 0.0088 | 0.0128 | 0.012  | 0.00445 | 38   |
| AUC <sub>0-24</sub> /Dose      | µg·hour/mL | 0.109  | 0.0747  | 0.072  | 0.105  | 0.104  | 0.0929 | 0.018   | 19.4 |
| AUC <sub>0-t(last)</sub> /Dose | µg·hour/mL |        |         |        | 0.122  | 0.18   | 0.151  | 0.041   | 27.2 |
| t <sub>1/2,z</sub>             | hour       |        |         |        | 5.5    | 13.2   | 9.35   | 5.44    | 58.2 |
| RA, C <sub>max</sub>           |            | 0.863  | 0.407   | 0.873  | 0.634  | 0.745  | 0.704  | 0.193   | 27.3 |
| RA, AUC <sub>0-24</sub>        |            | 0.973  | 0.629   | 0.549  | 0.738  | 0.72   | 0.722  | 0.16    | 22.1 |

<sup>(1)</sup> Nominal time

**Table 55.** Day 1 individual and mean ( $\pm$ SD, %CV) pharmacokinetic parameters of the sulfoxide metabolite after oral 800 mg/kg/day of Fexinidazole in female Beagle dogs.

| Parameter                      | Units      | Dog ID |        |        |        |        | Mean  | SD      | %CV  |
|--------------------------------|------------|--------|--------|--------|--------|--------|-------|---------|------|
|                                |            | 2564   | 2565   | 2569   | 2571   | 2573   |       |         |      |
| C <sub>max</sub>               | µg/mL      | 18.4   | 21.7   | 13.8   | 14.7   | 9.51   | 15.6  | 4.64    | 29.7 |
| t <sub>max</sub>               | hour       | 2      | 2      | 1      | 1      | 2      | 1.6   | 0.548   | 34.2 |
| AUC Interval                   | hour       | (0-24) | (0-24) | (0-24) | (0-24) | (0-24) |       |         |      |
| AUC <sub>0-t(last)</sub>       | µg·hour/mL | 135    | 173    | 105    | 136    | 54     | 121   | 44.4    | 36.8 |
| C <sub>max</sub> /Dose         | µg/mL      | 0.023  | 0.0271 | 0.0173 | 0.0184 | 0.0119 | 0.02  | 0.00578 | 29.6 |
| AUC <sub>0-t(last)</sub> /Dose | µg·hour/mL | 0.168  | 0.216  | 0.131  | 0.17   | 0.0675 | 0.151 | 0.0553  | 36.8 |

**Table 56** Day 14 individual and mean ( $\pm$ SD, %CV) pharmacokinetic parameters of the sulfoxide metabolite after oral 800 mg/kg/day of Fexinidazole in female Beagle dogs.

| Parameter                      | Units      | Dog ID |        |        |        |        | Mean  | SD     | %CV  |
|--------------------------------|------------|--------|--------|--------|--------|--------|-------|--------|------|
|                                |            | 2564   | 2565   | 2569   | 2571   | 2573   |       |        |      |
| C <sub>max</sub>               | µg/mL      | 21.7   | 14.1   | 18.2   | 10.5   | 9.73   | 14.8  | 5.1    | 34.3 |
| t <sub>max</sub>               | hour       | 1      | 4      | 2      | 2      | 1      | 2     | 1.22   | 61.2 |
| AUC Interval                   | hour       | (0-24) | (0-24) | (0-24) | (0-24) | (0-24) |       |        |      |
| AUC <sub>0-t(last)</sub>       | µg·hour/mL | 178    | 190    | 126    | 113    | 113    | 144   | 37.1   | 25.8 |
| C <sub>max</sub> /Dose         | µg/mL      | 0.0271 | 0.0176 | 0.0228 | 0.0131 | 0.0122 | 0.019 | 0.0064 | 34.3 |
| AUC <sub>0-t(last)</sub> /Dose | µg·hour/mL | 0.223  | 0.238  | 0.157  | 0.141  | 0.141  | 0.18  | 0.0469 | 26   |
| RA, C <sub>max</sub>           |            | 1.18   | 0.65   | 1.32   | 0.714  | 1.02   | 0.977 | 0.29   | 29.7 |
| RA, AUC <sub>0-t(last)</sub>   |            | 1.32   | 1.1    | 1.2    | 0.831  | 2.09   | 1.31  | 0.474  | 36.2 |

**Table 57.** Day 28 individual and mean ( $\pm$ SD, %CV) pharmacokinetic parameters of the sulfoxide metabolite after oral 800 mg/kg/day of Fexinidazole in female Beagle dogs.

| Parameter                      | Units      | Dog ID |        |        |         |         | Mean   | SD      | %CV  |
|--------------------------------|------------|--------|--------|--------|---------|---------|--------|---------|------|
|                                |            | 2564   | 2565   | 2569   | 2571    | 2573    |        |         |      |
| C <sub>max</sub>               | µg/mL      | 11.9   | 13.2   | 9.8    | 7.83    | 4.66    | 9.48   | 3.38    | 35.7 |
| t <sub>max</sub>               | hour       | 1      | 2      | 1      | 2       | 1       | 1.4    | 0.548   | 39.1 |
| AUC Interval <sup>(1)</sup>    | hour       | (0-24) | (0-24) | (0-24) | (0-24)  | (0-24)  |        |         |      |
| AUC <sub>0-t(last)</sub>       | µg·hour/mL | 66.3   | 163    | 73.6   | 96.7    | 45.4    | 89     | 45.2    | 50.8 |
| C <sub>max</sub> /Dose         | µg/mL      | 0.0149 | 0.0165 | 0.0123 | 0.00979 | 0.00583 | 0.0119 | 0.00423 | 35.7 |
| AUC <sub>0-t(last)</sub> /Dose | µg·hour/mL | 0.0829 | 0.203  | 0.092  | 0.121   | 0.0567  | 0.111  | 0.0563  | 50.6 |
| RA, C <sub>max</sub>           |            | 0.647  | 0.608  | 0.71   | 0.533   | 0.49    | 0.598  | 0.088   | 14.7 |
| RA, AUC <sub>0-t(last)</sub>   |            | 0.491  | 0.942  | 0.701  | 0.711   | 0.841   | 0.737  | 0.17    | 23   |
| <sup>(1)</sup> Nominal time    |            |        |        |        |         |         |        |         |      |



**Figure 1.** Day 1 individual plasma concentrations (ng/mL) of Fexinidazole and metabolites after oral 50 mg/kg/day dose of Fexinidazole in male (upper panel) and female (lower panel) Beagle dogs.

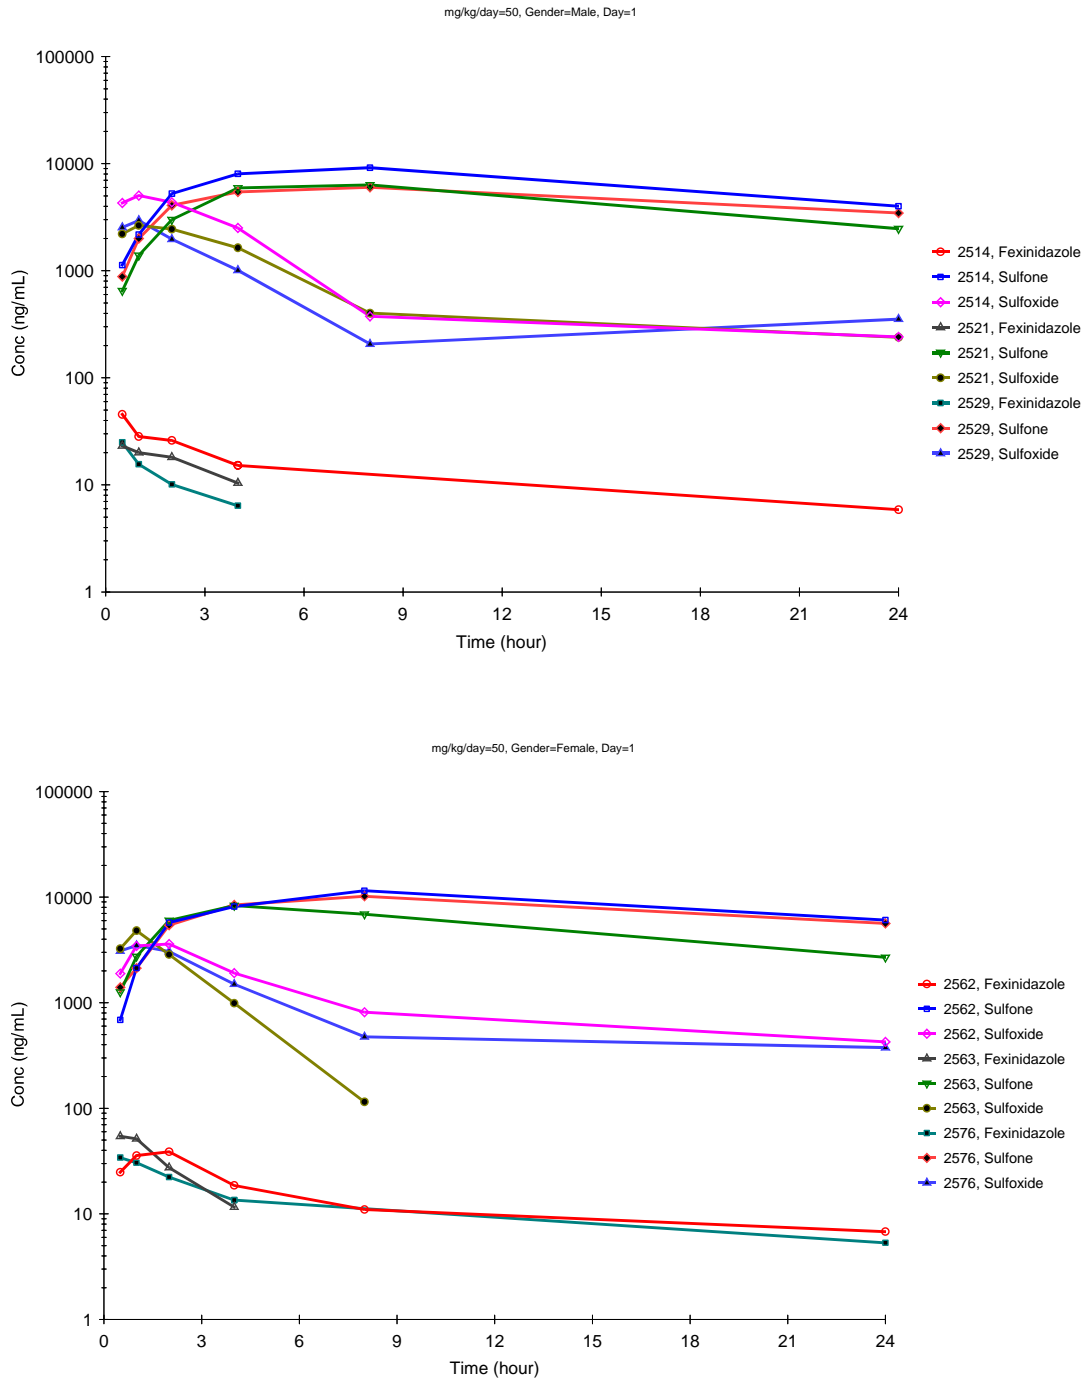

**Figure 2.** Day 14 individual plasma concentrations (ng/mL) of Fexinidazole and metabolites after oral 50 mg/kg/day dose of Fexinidazole in male (upper panel) and female (lower panel) Beagle dogs.

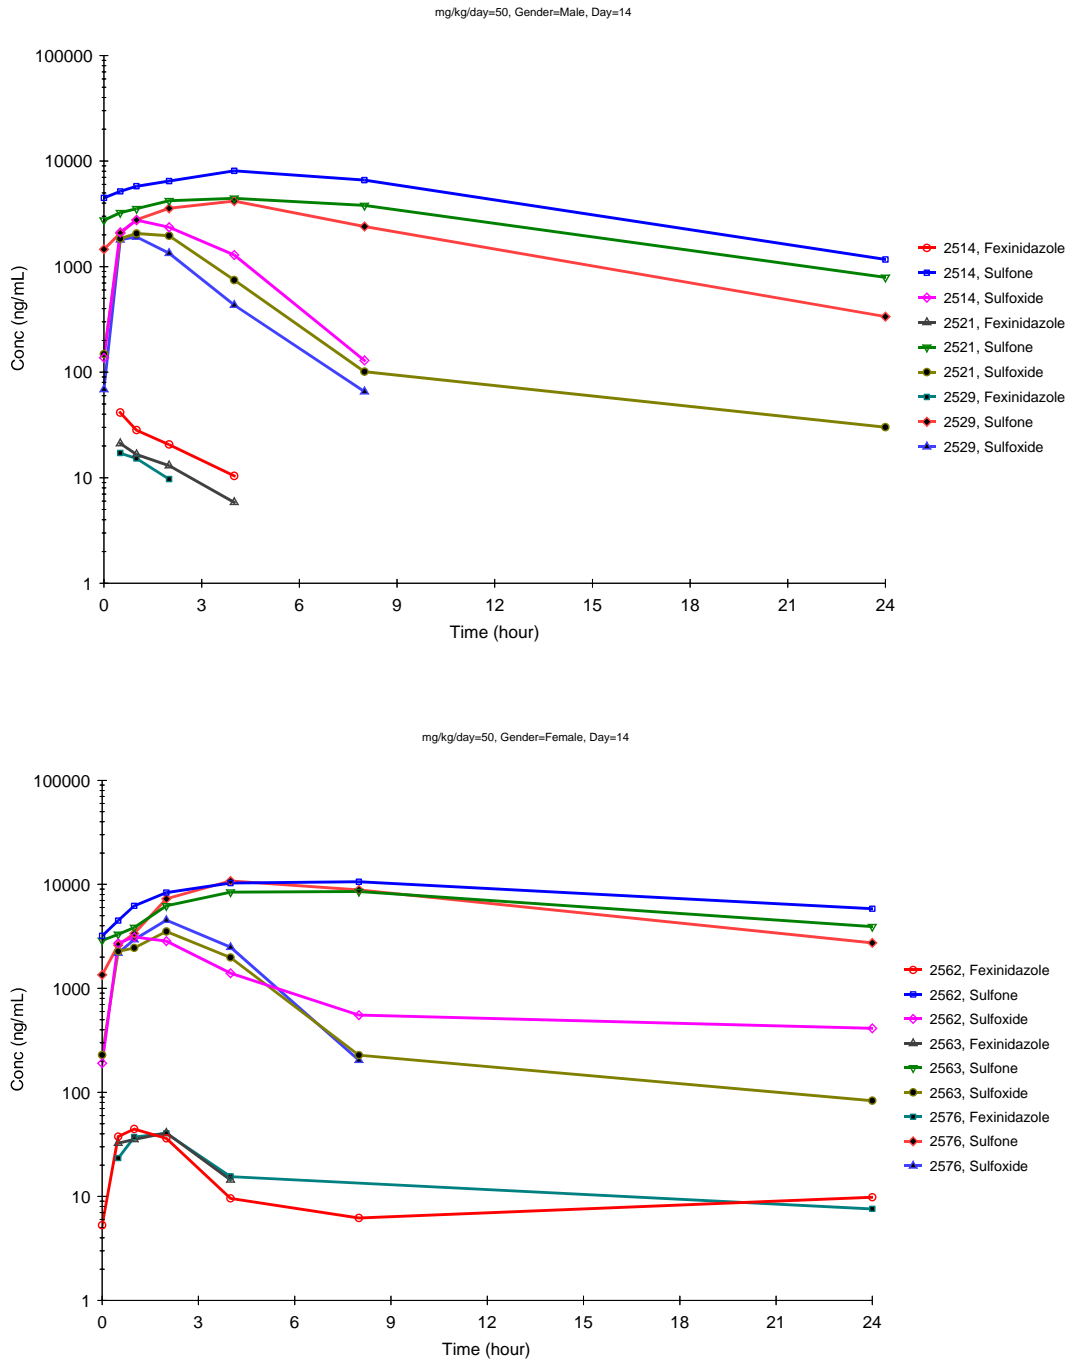

**Figure 3.** Day 28 individual plasma concentrations (ng/mL) of Fexinidazole and metabolites after oral 50 mg/kg/day dose of Fexinidazole in male (upper panel) and female (lower panel) Beagle dogs.

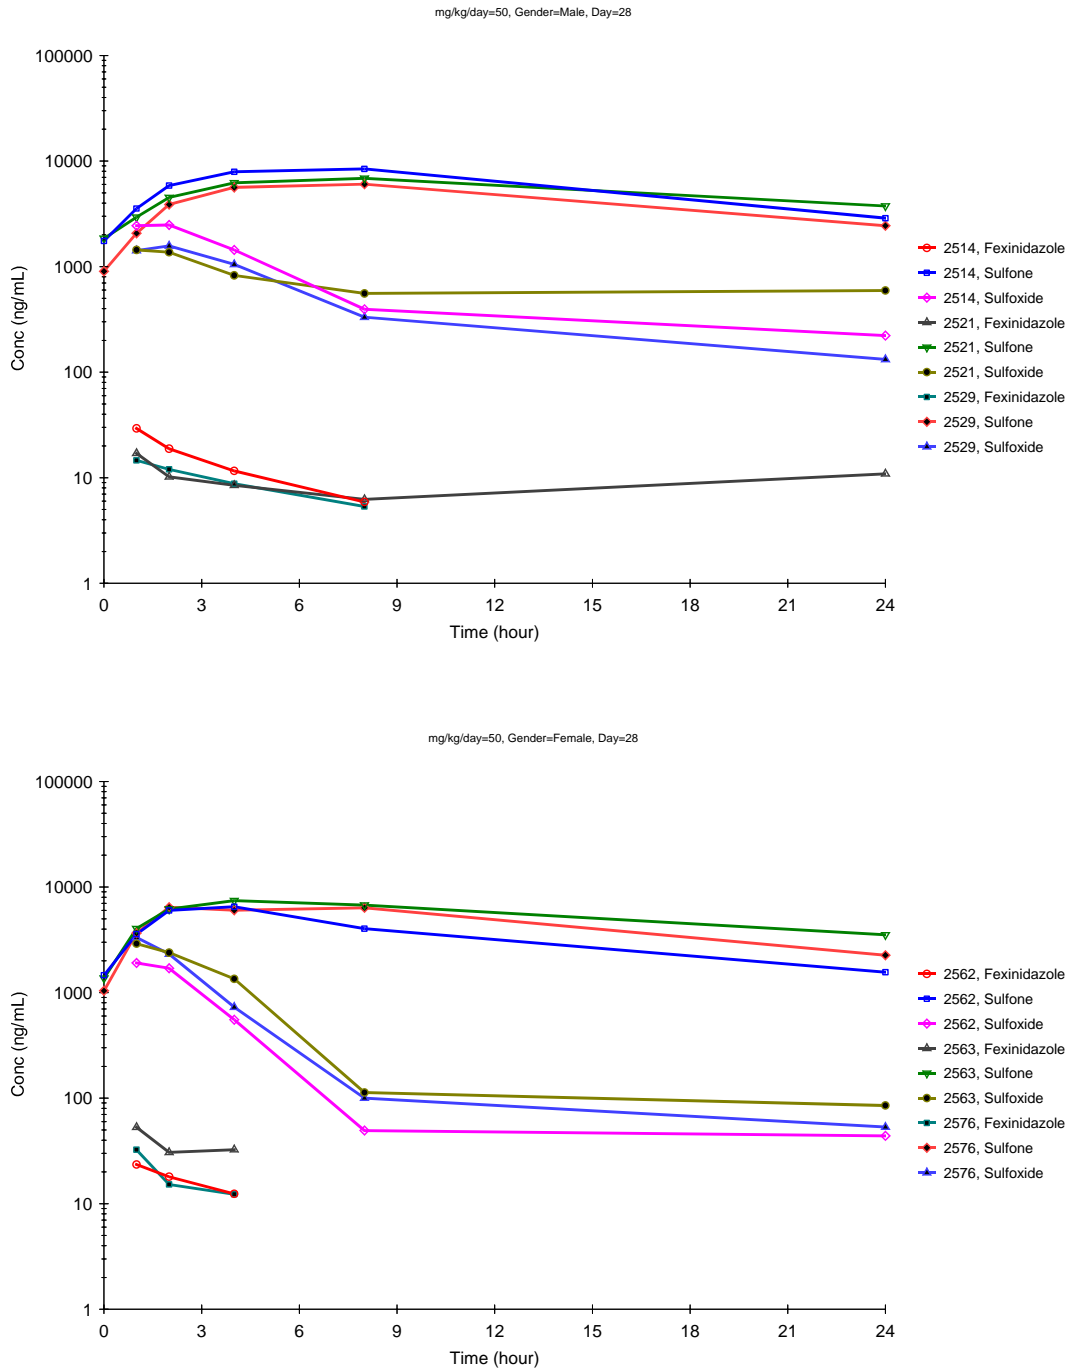

**Figure 4.** Day 1 individual plasma concentrations (ng/mL) of Fexinidazole and metabolites after oral 200 mg/kg/day dose of Fexinidazole in male (upper panel) and female (lower panel) Beagle dogs.

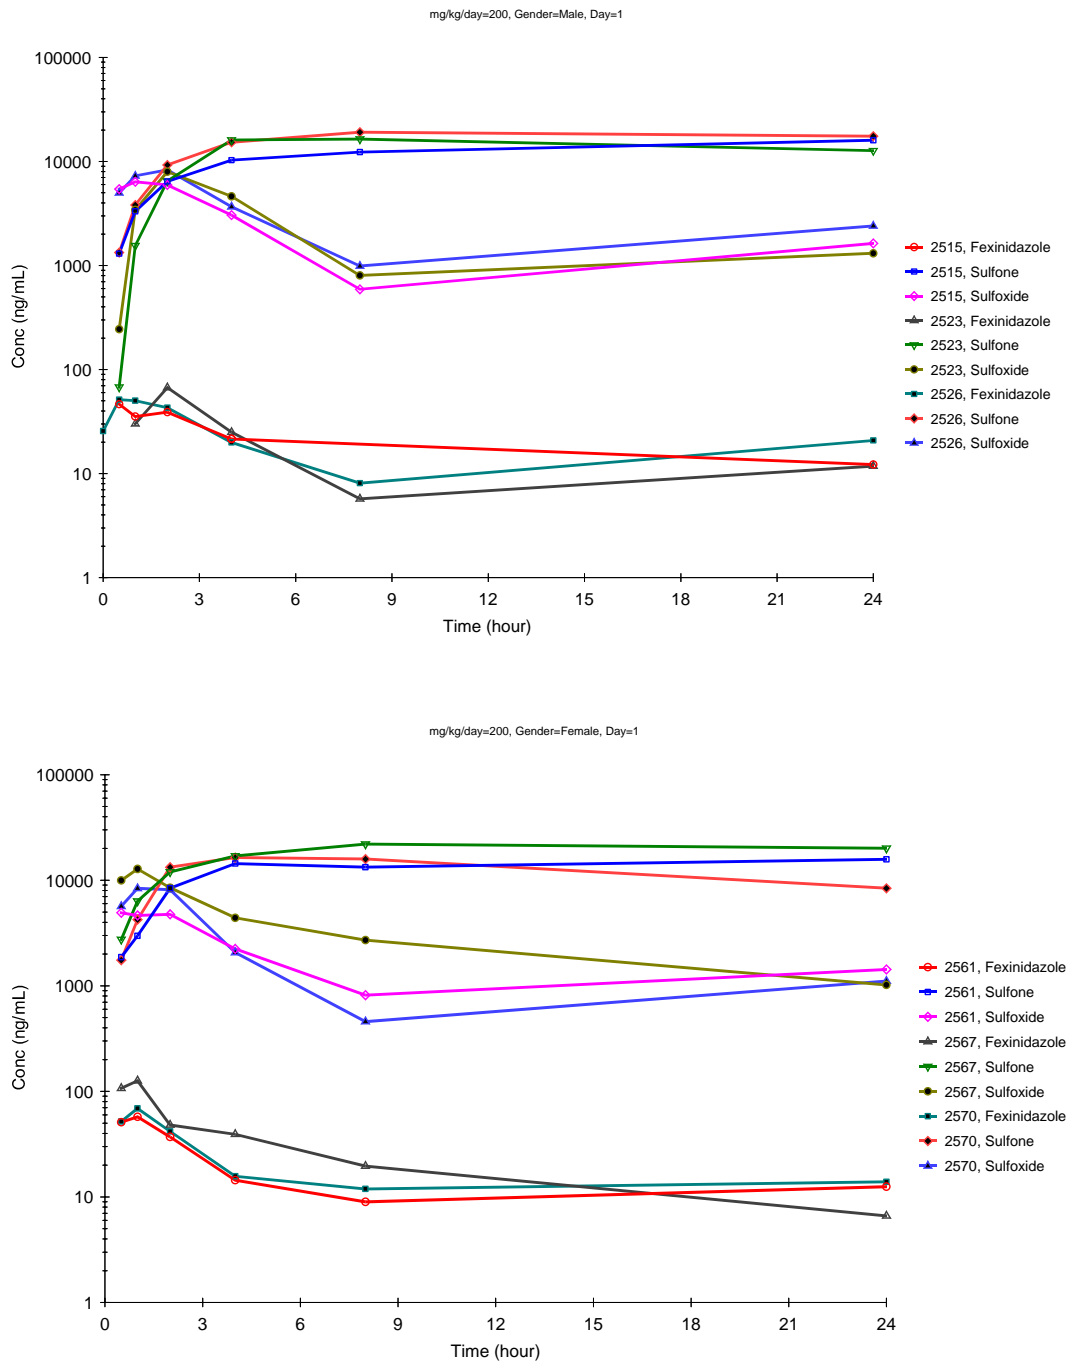

**Figure 5.** Day 14 individual plasma concentrations (ng/mL) of Fexinidazole and metabolites after oral 200 mg/kg/day dose of Fexinidazole in male (upper panel) and female (lower panel) Beagle dogs.

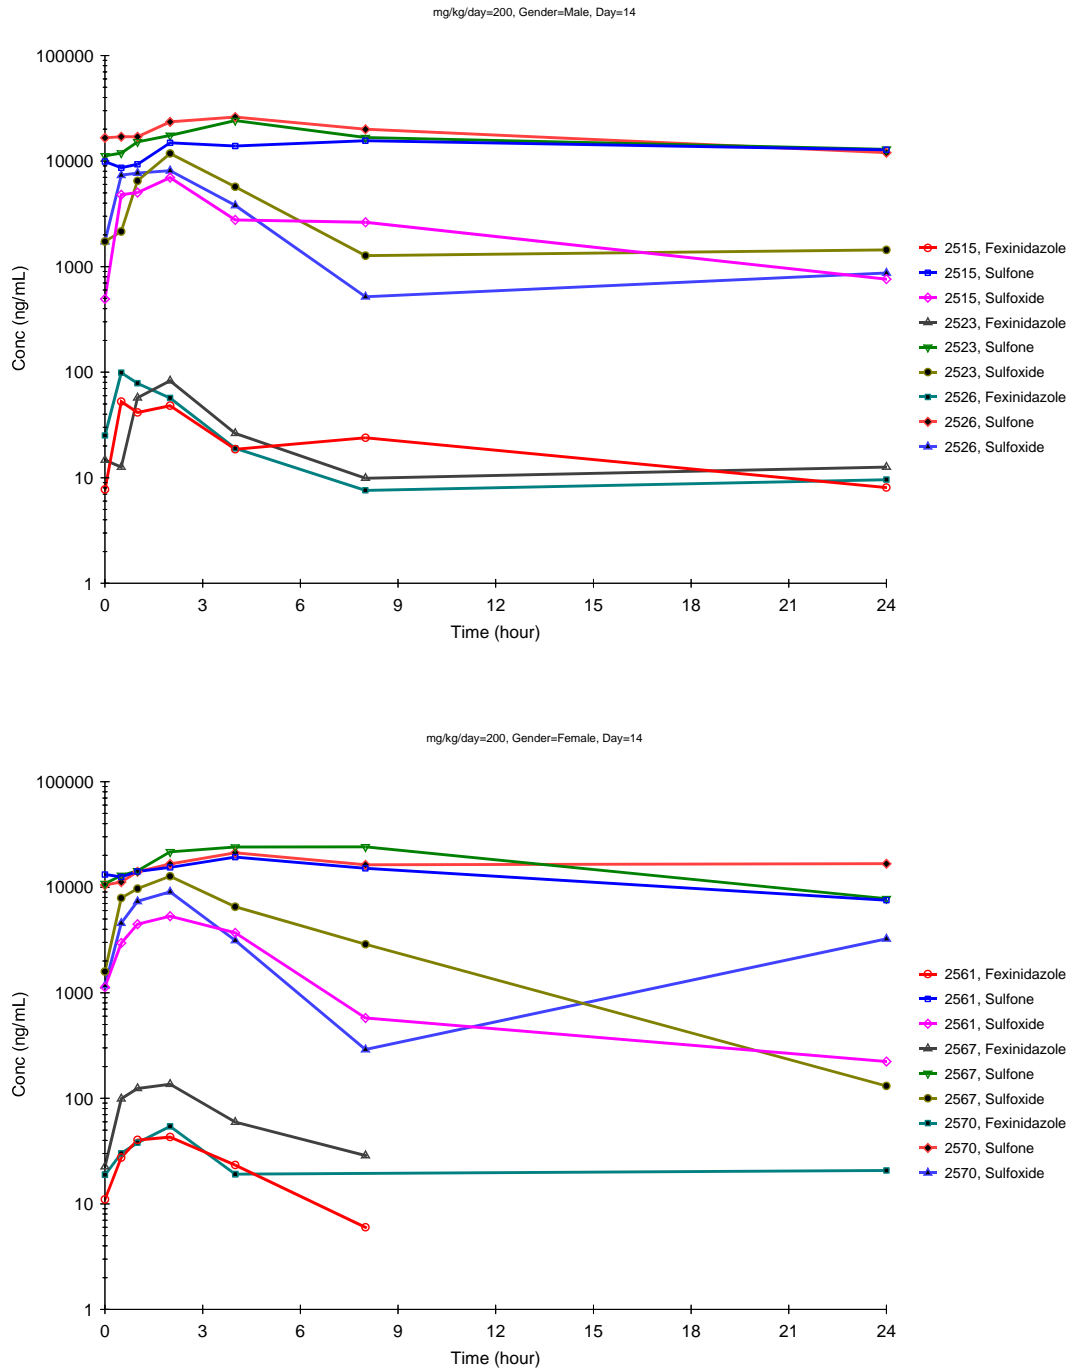

**Figure 6.** Day 28 individual plasma concentrations (ng/mL) of Fexinidazole and metabolites after oral 200 mg/kg/day dose of Fexinidazole in male (upper panel) and female (lower panel) Beagle dogs.

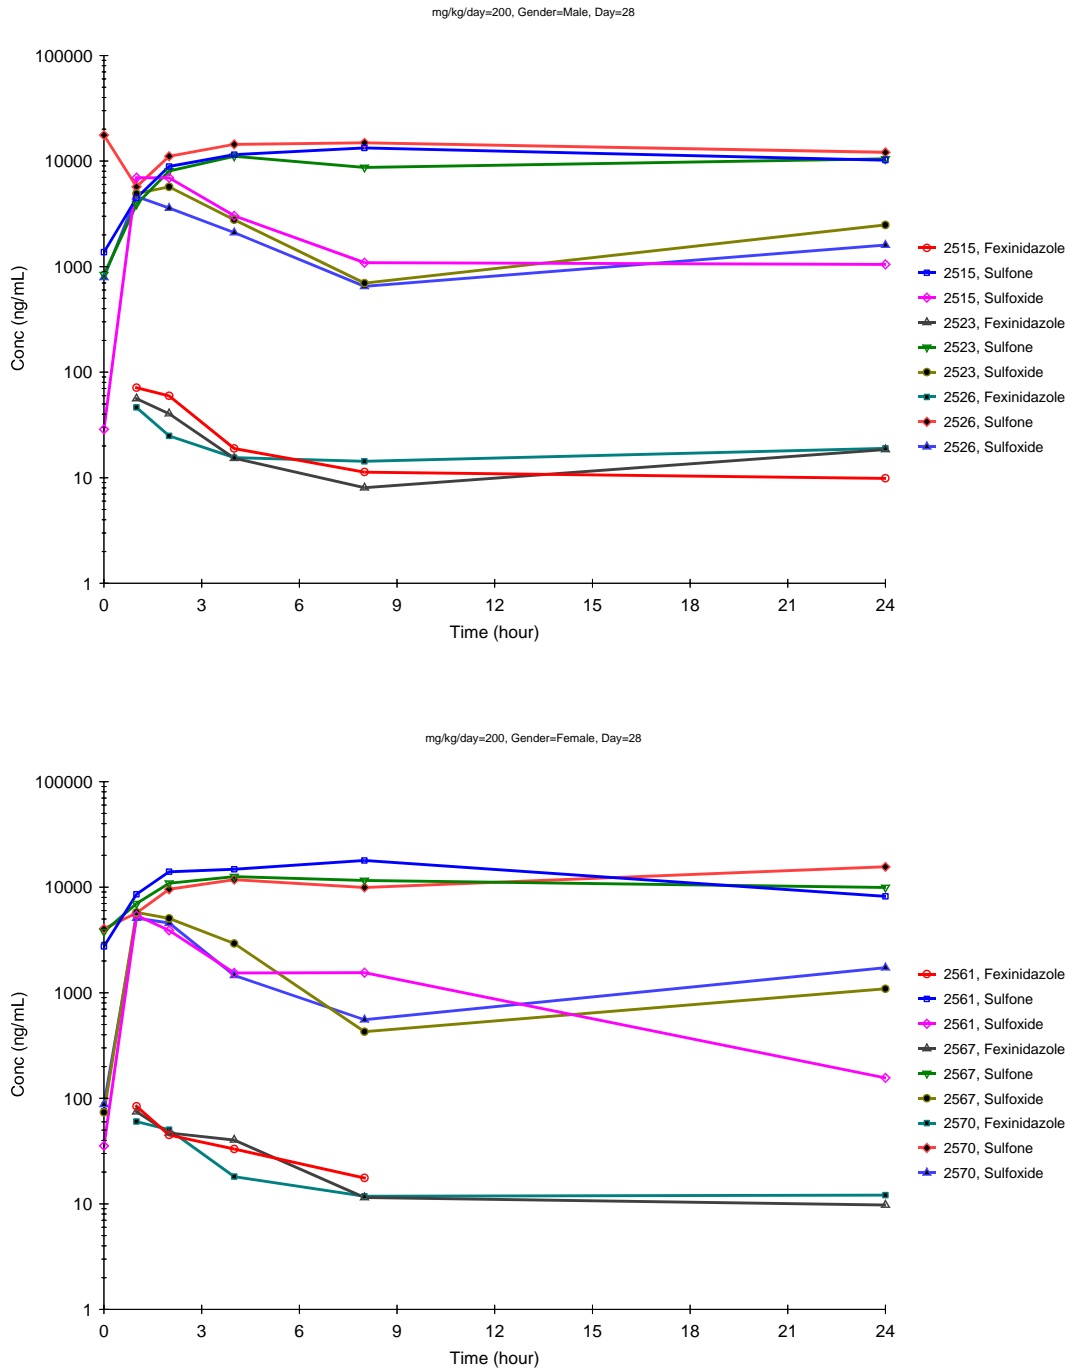

**Figure 7.** Day 1 individual plasma concentrations (ng/mL) of Fexinidazole after oral 800 mg/kg/day dose of Fexinidazole in male (upper panel) and female (lower panel) Beagle

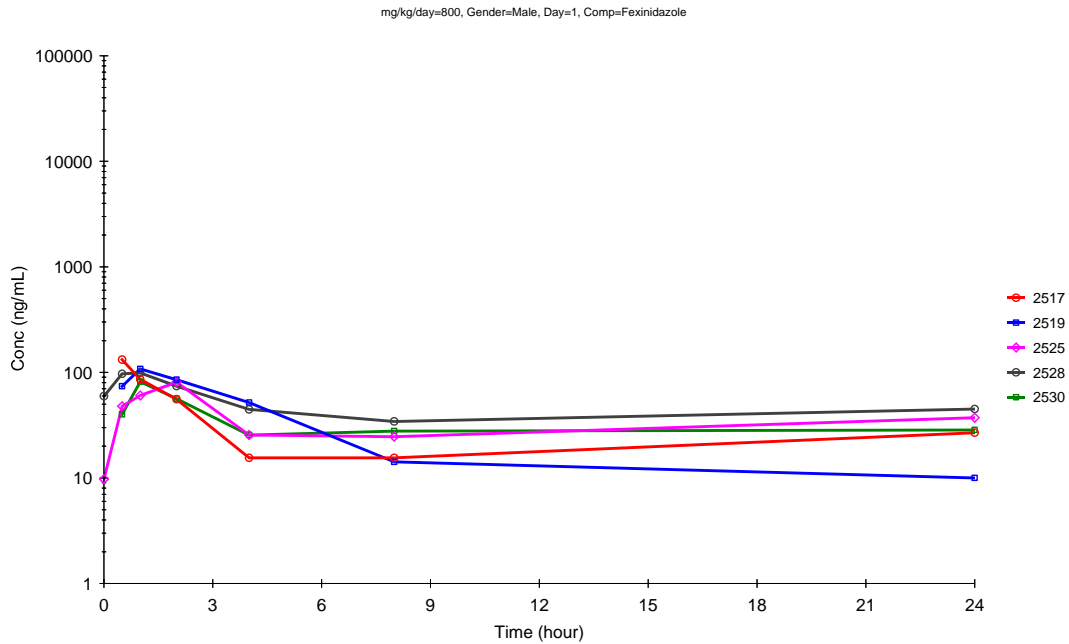

dogs.

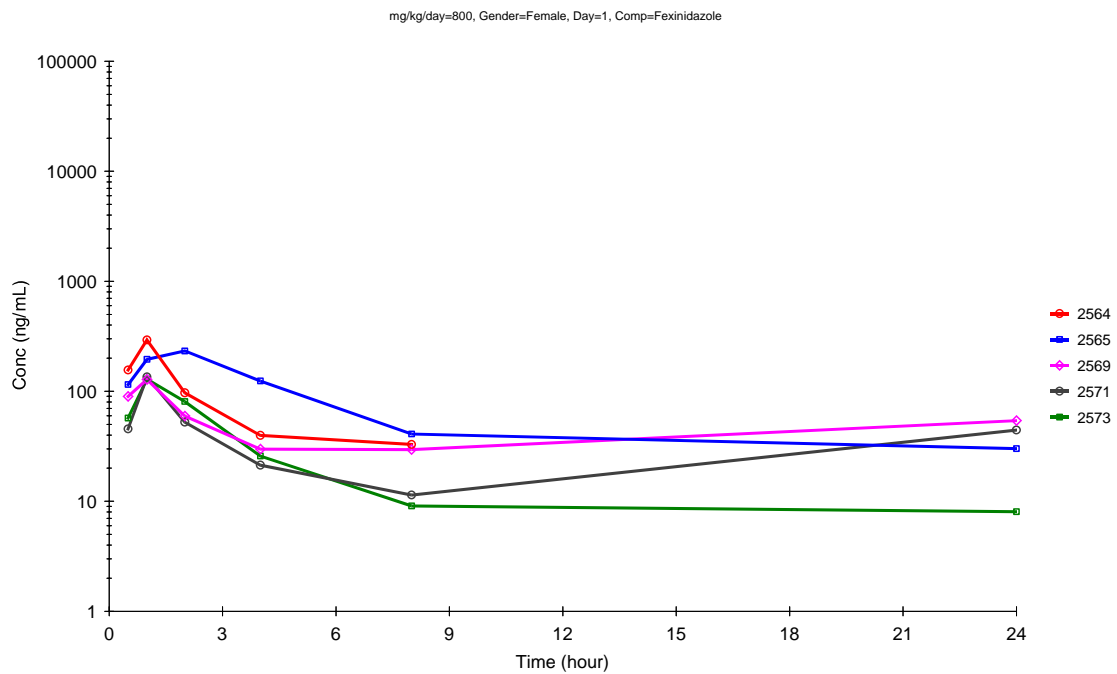

**Figure 8.** Day 1 individual plasma concentrations (ng/mL) of sulfone metabolite after oral 800 mg/kg/day dose of Fexinidazole in male (upper panel) and female (lower panel) Beagle dogs.

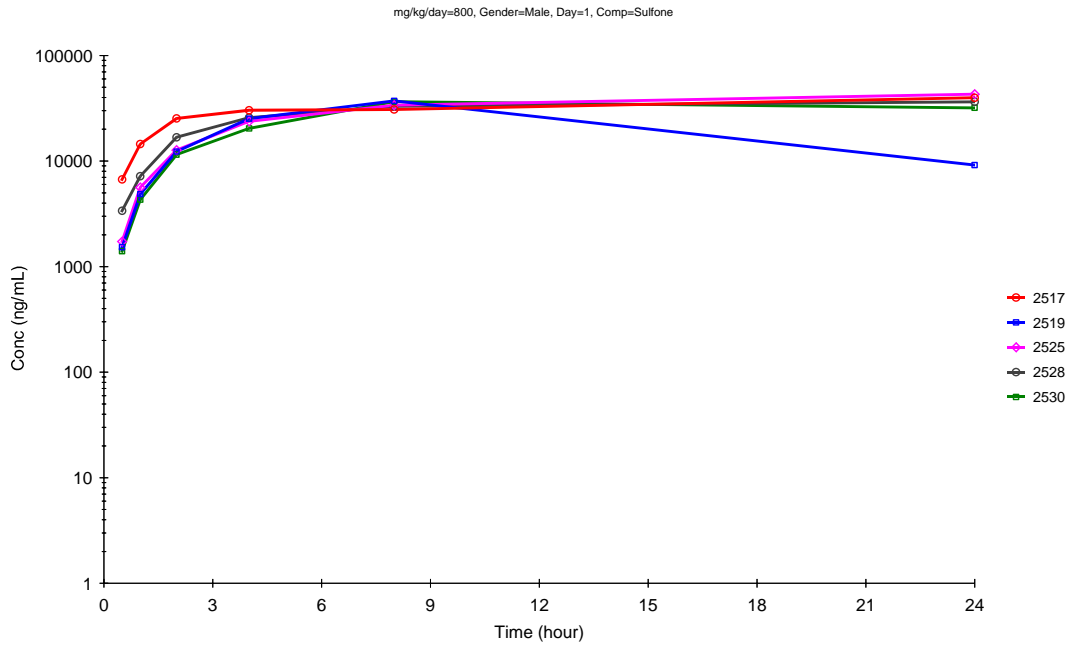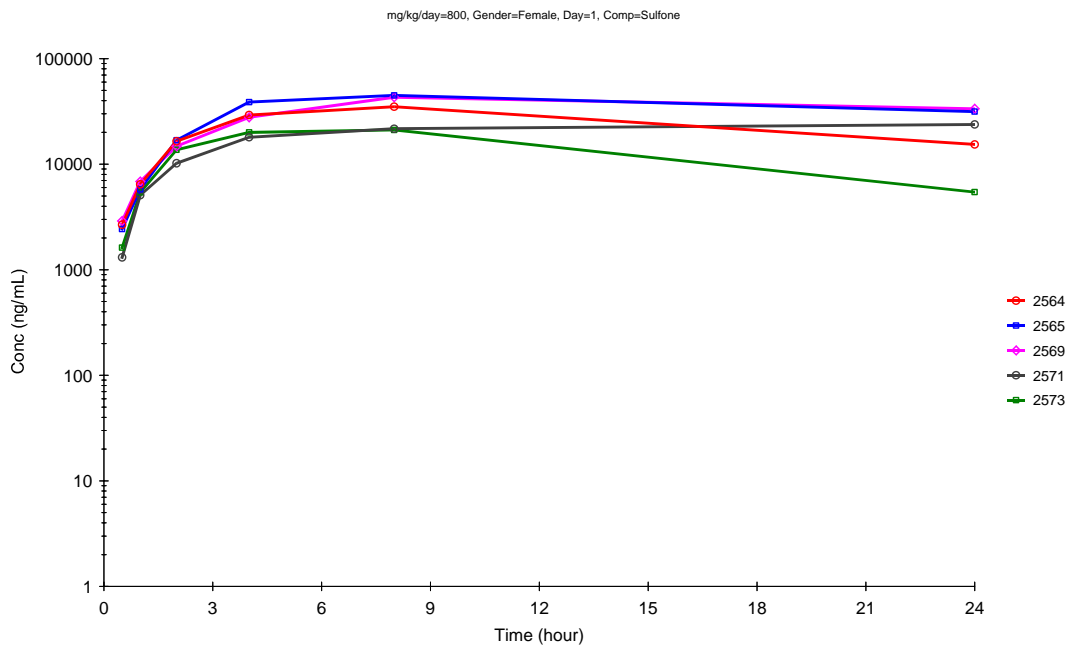



**Figure 9.** Day 1 individual plasma concentrations (ng/mL) of sulfoxide metabolite after oral 800 mg/kg/day dose of Fexinidazole in male (upper panel) and female (lower panel) Beagle dogs.

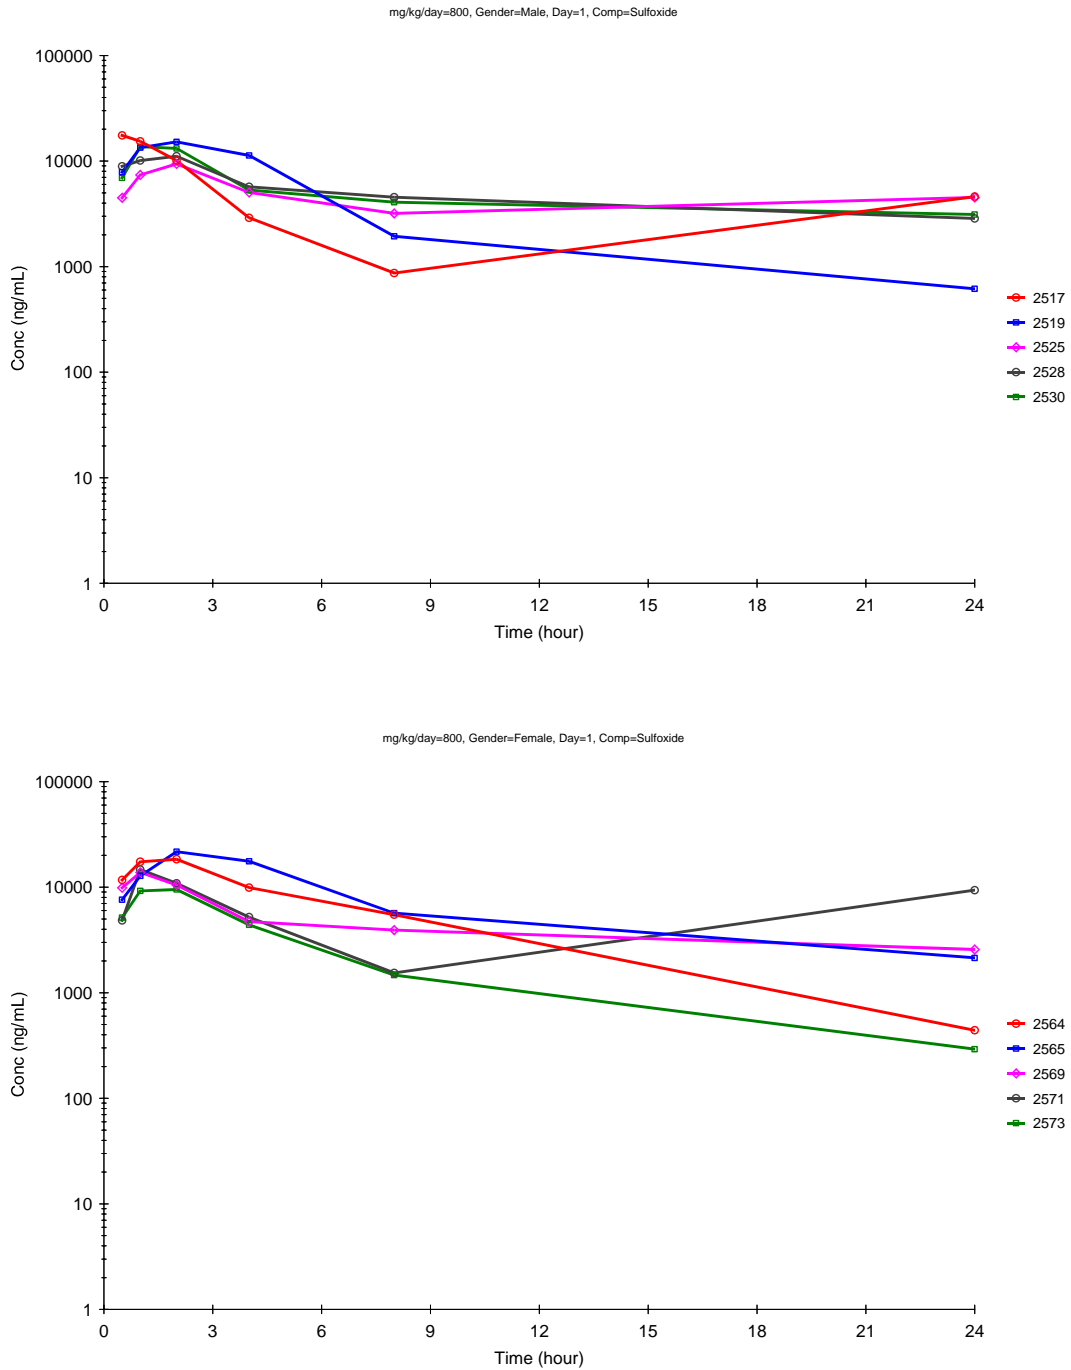

**Figure 10.** Day 14 individual plasma concentrations (ng/mL) of Fexinidazole after oral 800 mg/kg/day dose of Fexinidazole in male (upper panel) and female (lower panel) Beagle

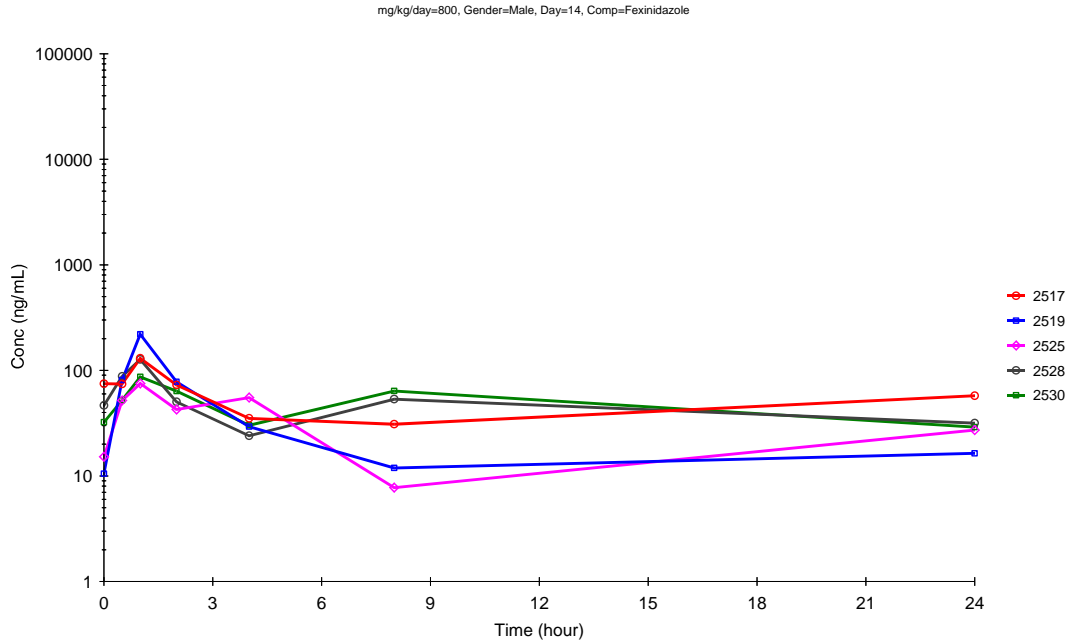

dogs.

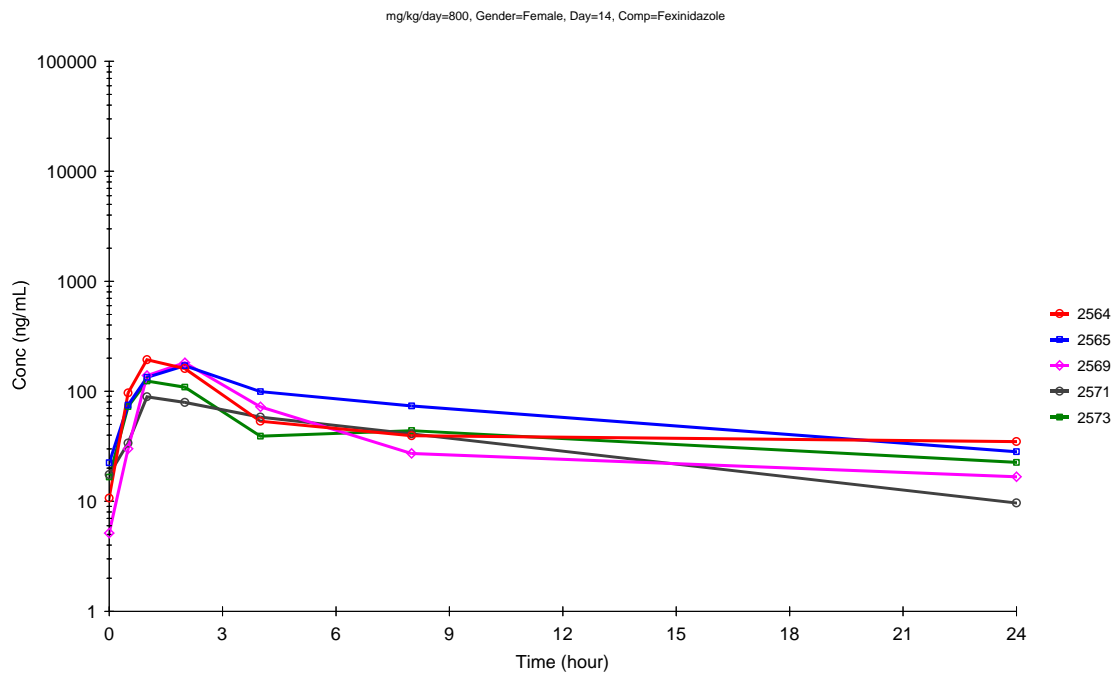

**Figure 11.** Day 14 individual plasma concentrations (ng/mL) of sulfone metabolite after oral 800 mg/kg/day dose of Fexinidazole in male (upper panel) and female (lower panel) Beagle dogs.

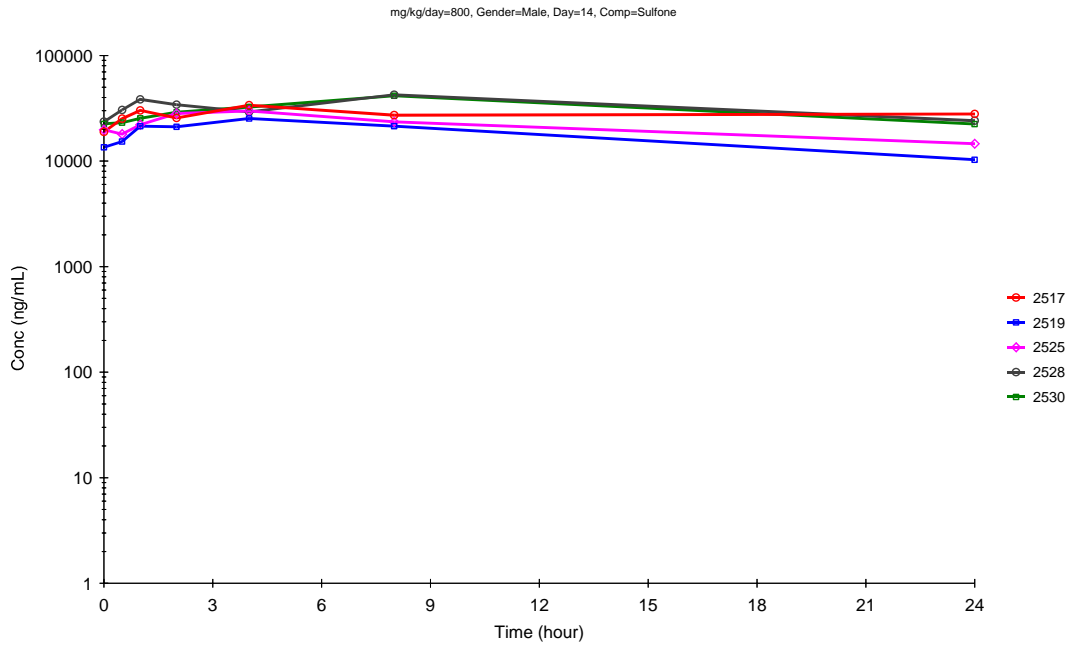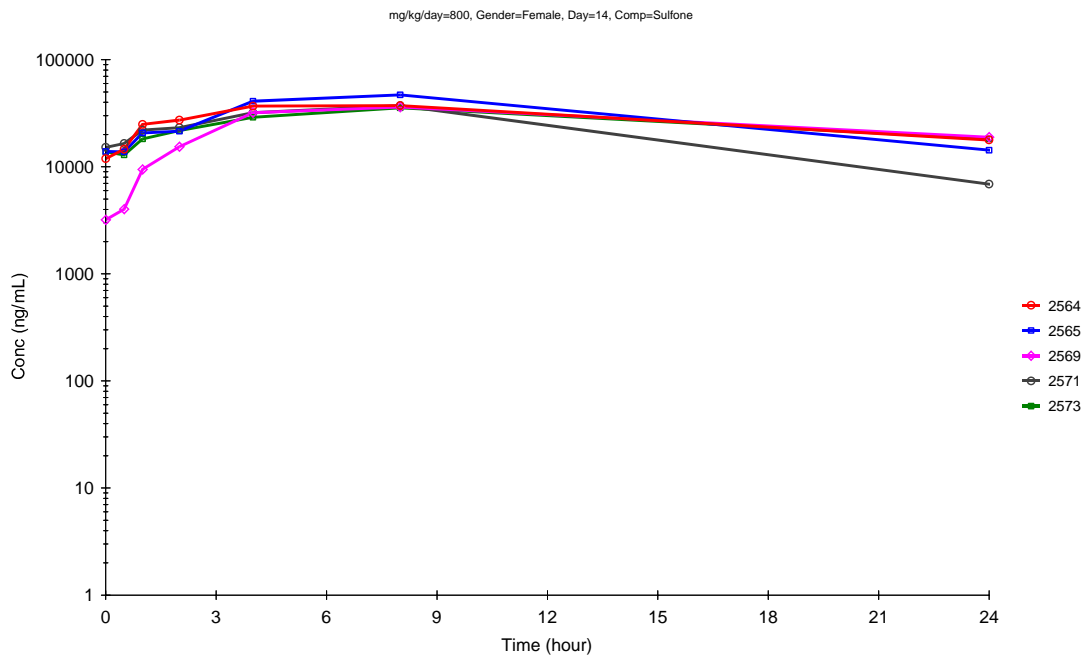

**Figure 12.** Day 14 individual plasma concentrations (ng/mL) of sulfoxide metabolite after oral 800 mg/kg/day dose of Fexinidazole in male (upper panel) and female (lower panel) Beagle dogs.

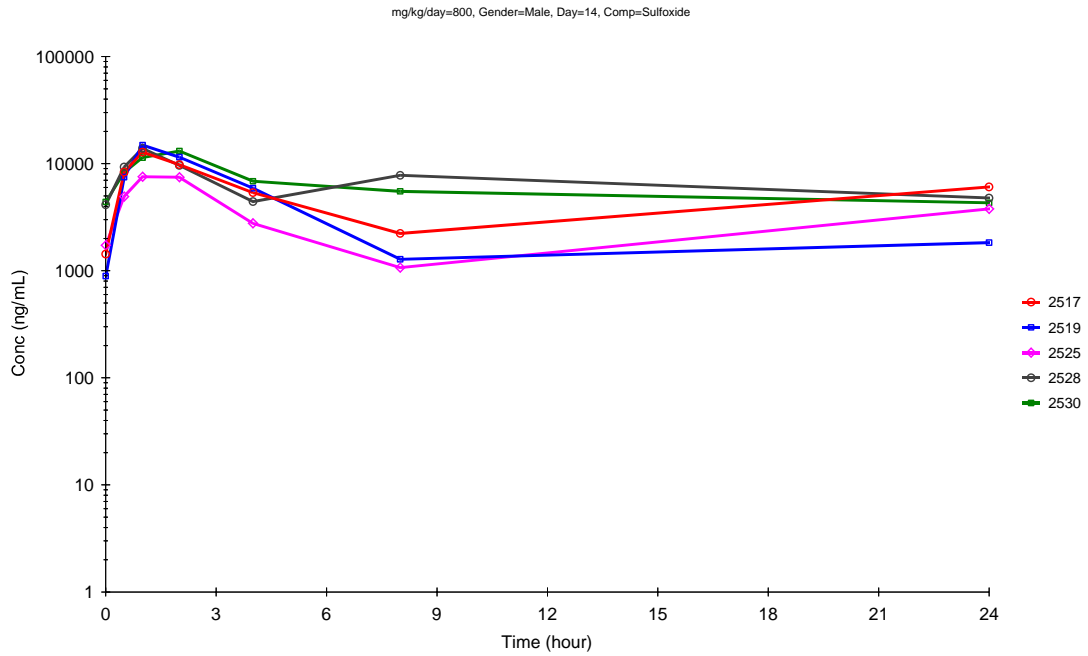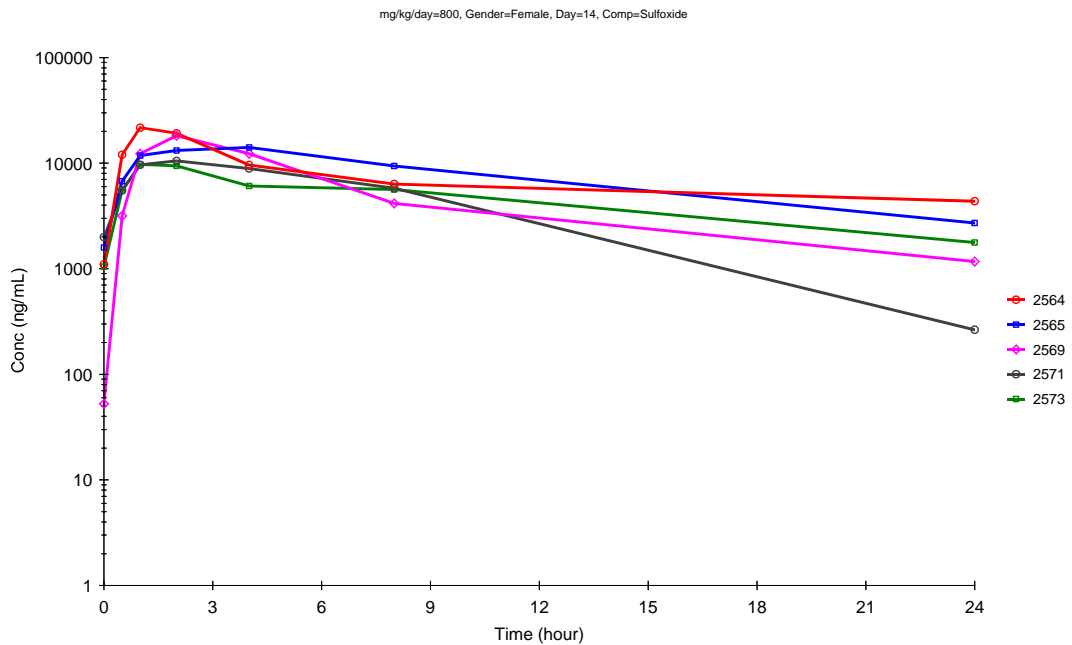

**Figure 13.** Day 28 individual plasma concentrations (ng/mL) of Fexinidazole after oral 800 mg/kg/day dose of Fexinidazole in male (upper panel) and female (lower panel) Beagle dogs.

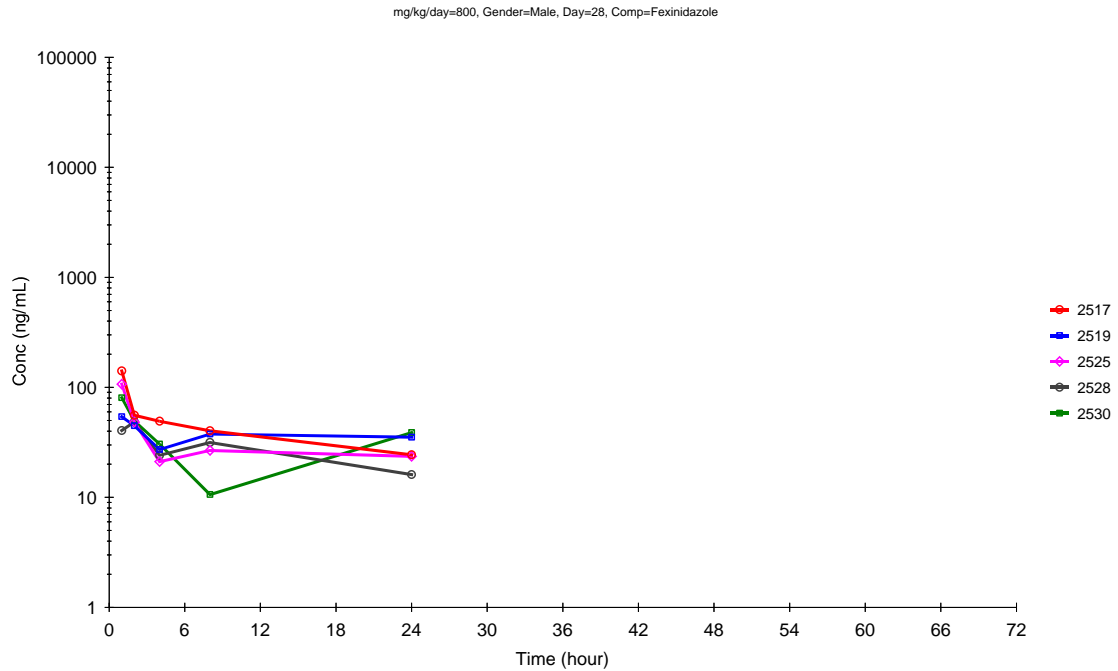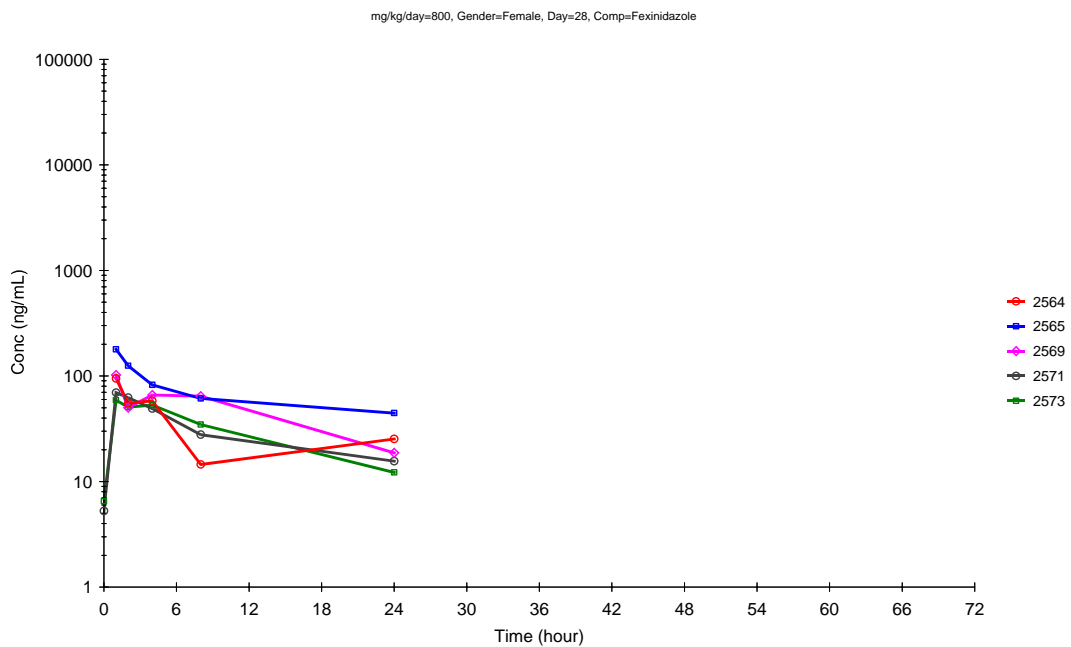

**Figure 14.** Day 28 individual plasma concentrations (ng/mL) of sulfone metabolite after oral 800 mg/kg/day dose of Fexinidazole in male (upper panel) and female (lower panel) Beagle dogs.

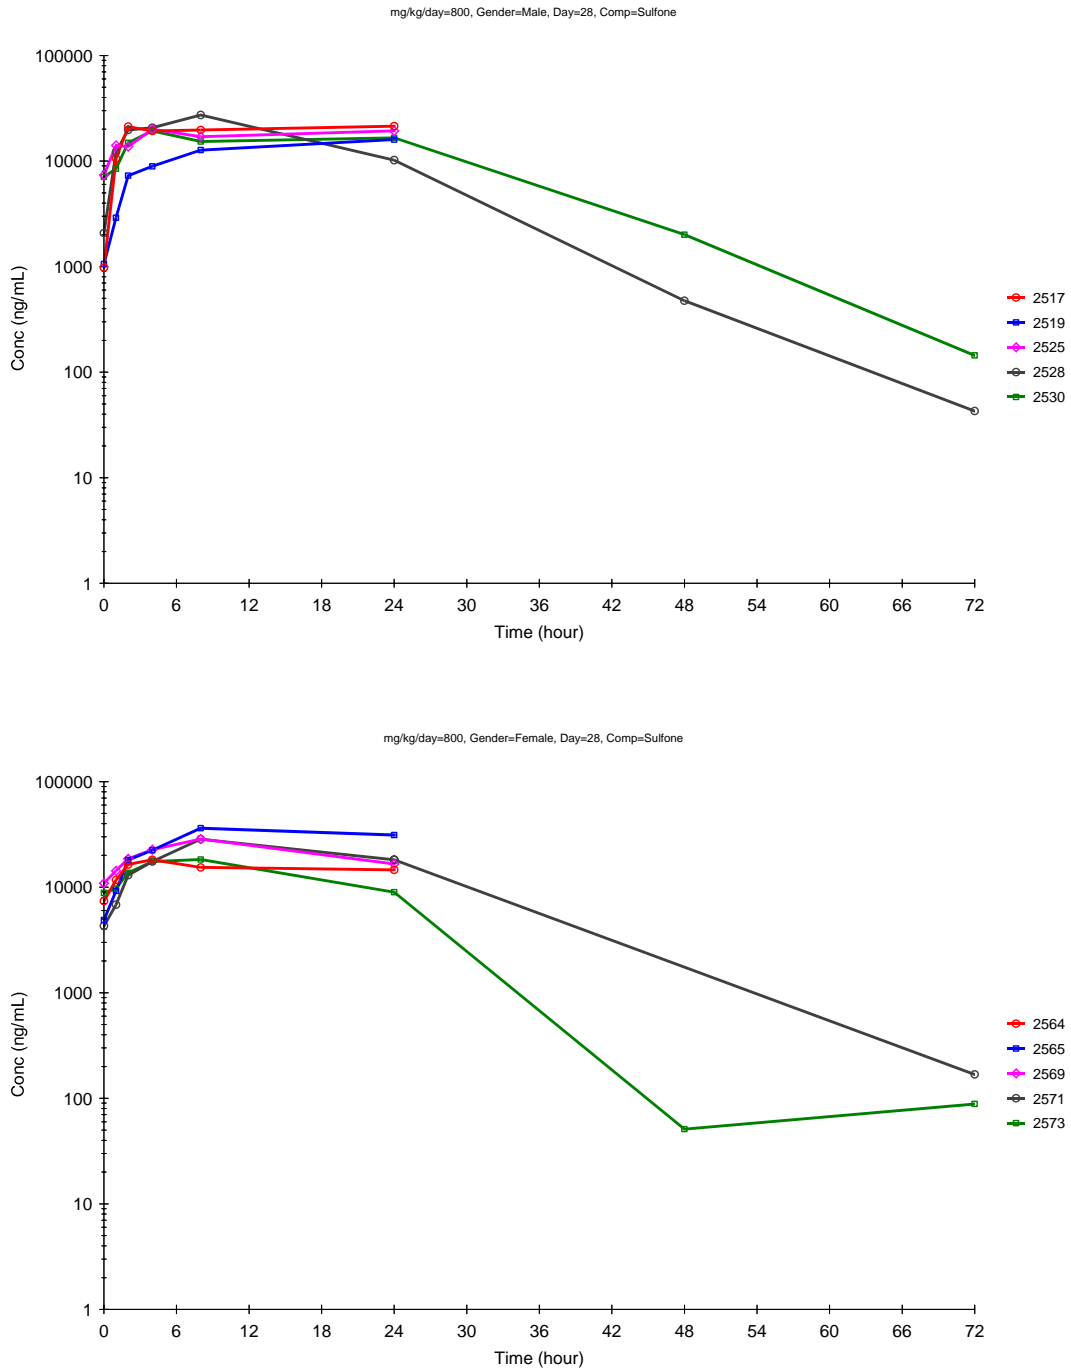

**Figure 15.** Day 28 individual plasma concentrations (ng/mL) of sulfoxide metabolite after oral 800 mg/kg/day dose of Fexinidazole in male (upper panel) and female (lower panel) Beagle dogs.

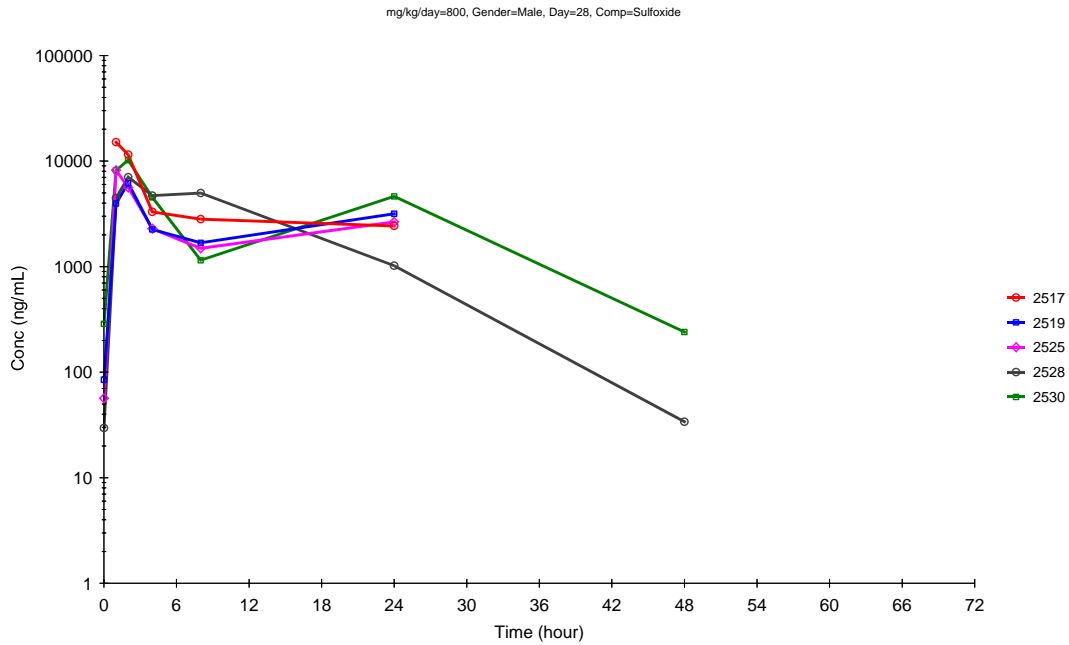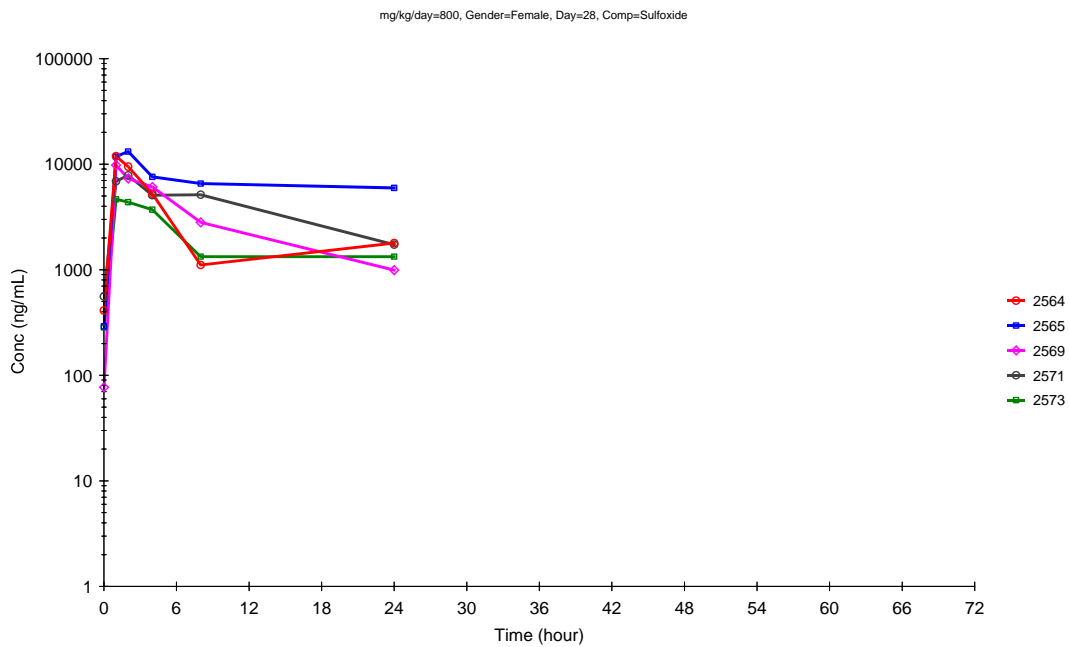

**Figure 16.** Day 1 mean (+SD) plasma concentrations (ng/mL) of Fexinidazole and metabolites after single and repeated oral 50, 200 and 800 mg/kg/day of Fexinidazole in male Beagle dogs.

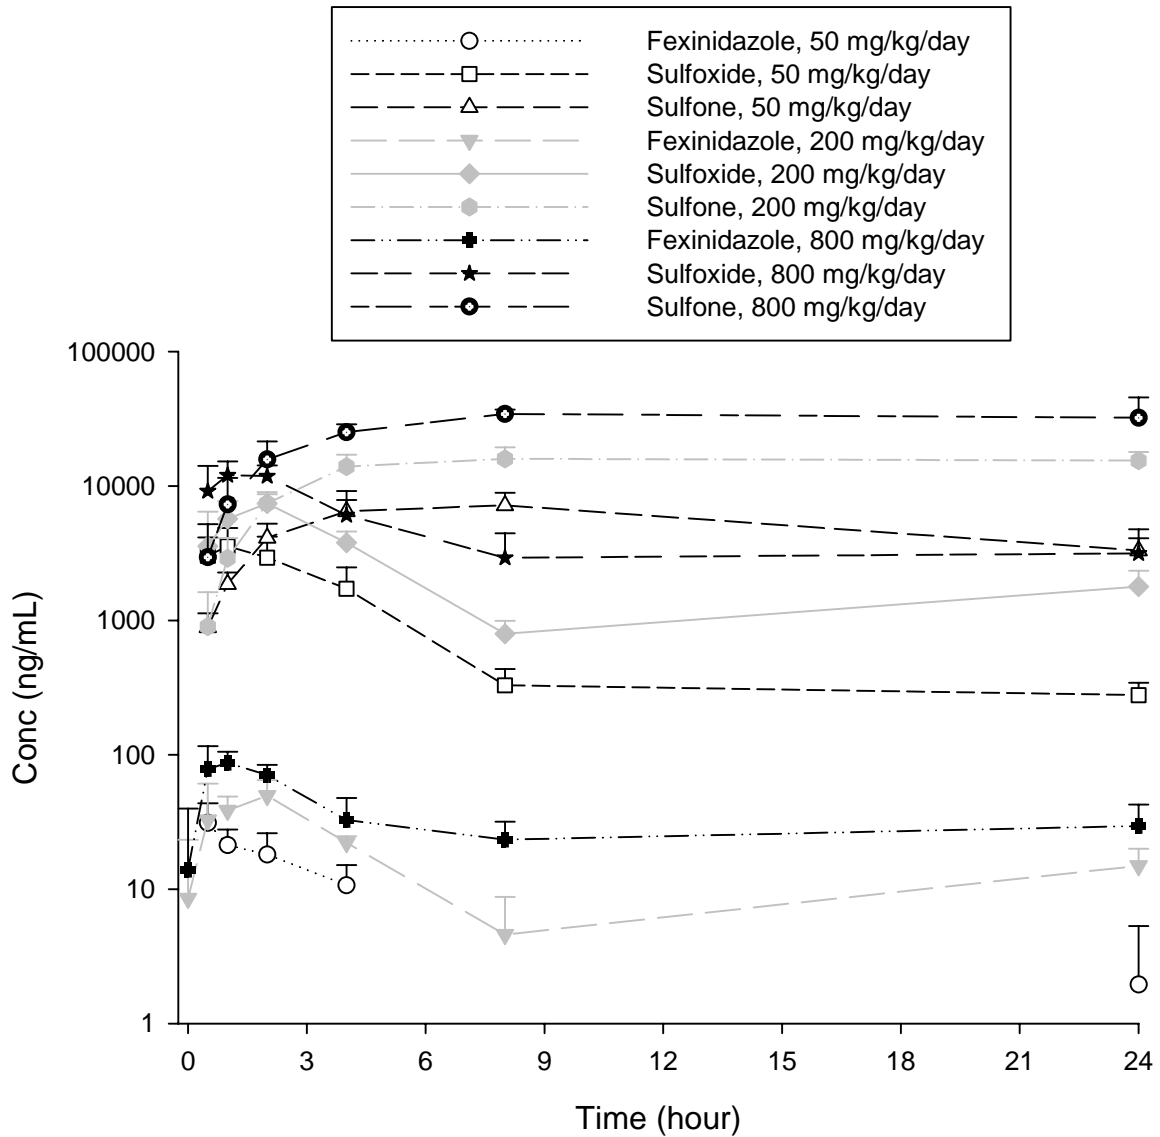



**Figure 17.** Day 1 mean (+SD) plasma concentrations (ng/mL) of Fexinidazole and metabolites after single and repeated oral 50, 200 and 800 mg/kg/day of Fexinidazole in female Beagle dogs.

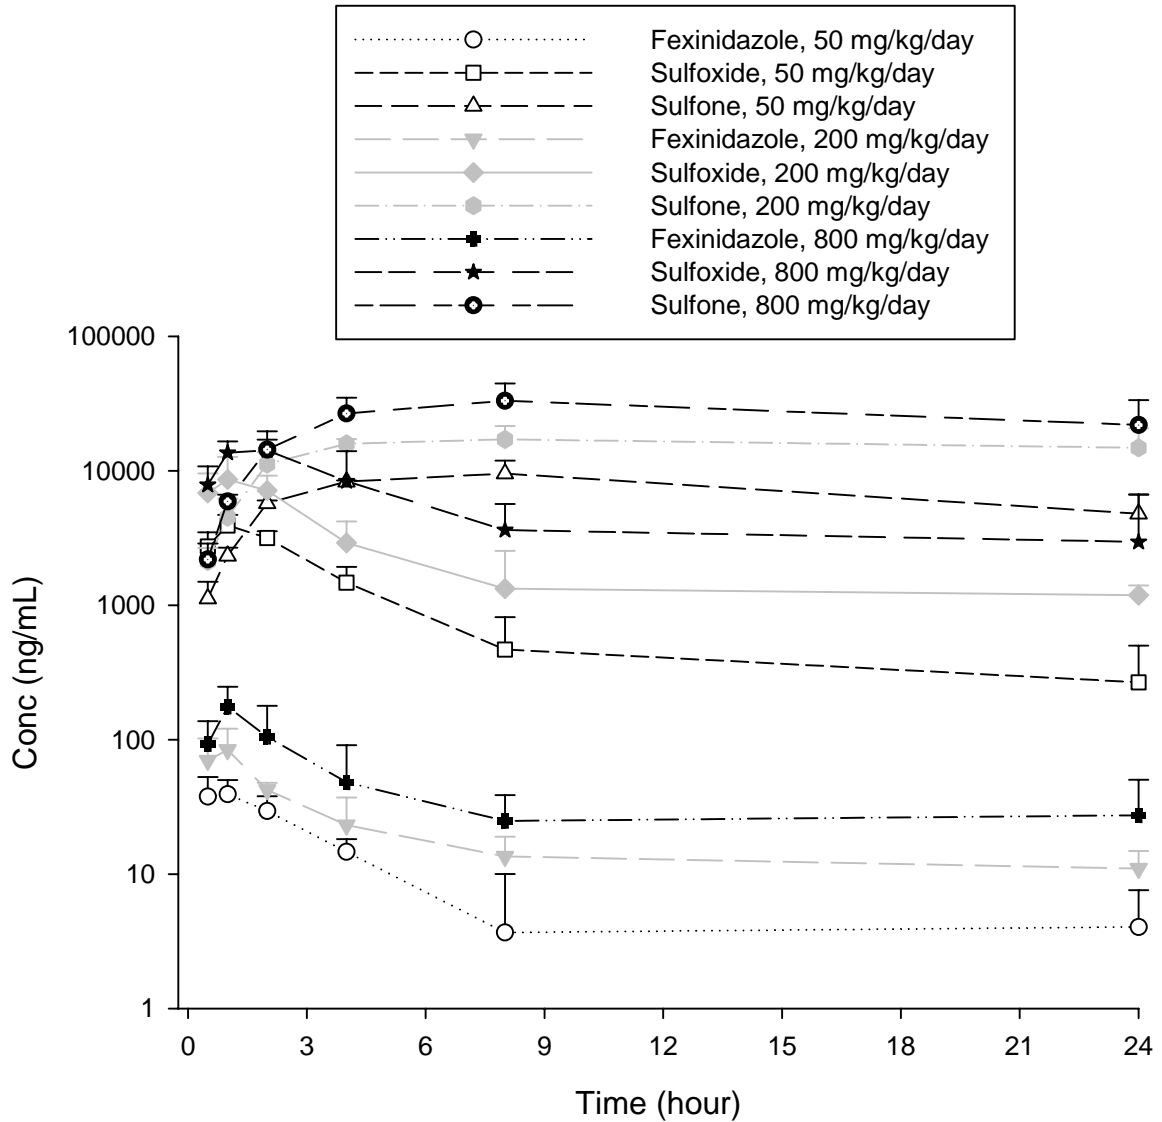

**Figure 18.** Day 14 mean (+SD) plasma concentrations (ng/mL) of Fexinidazole and metabolites after single and repeated oral 50, 200 and 800 mg/kg/day of Fexinidazole in male Beagle dogs.

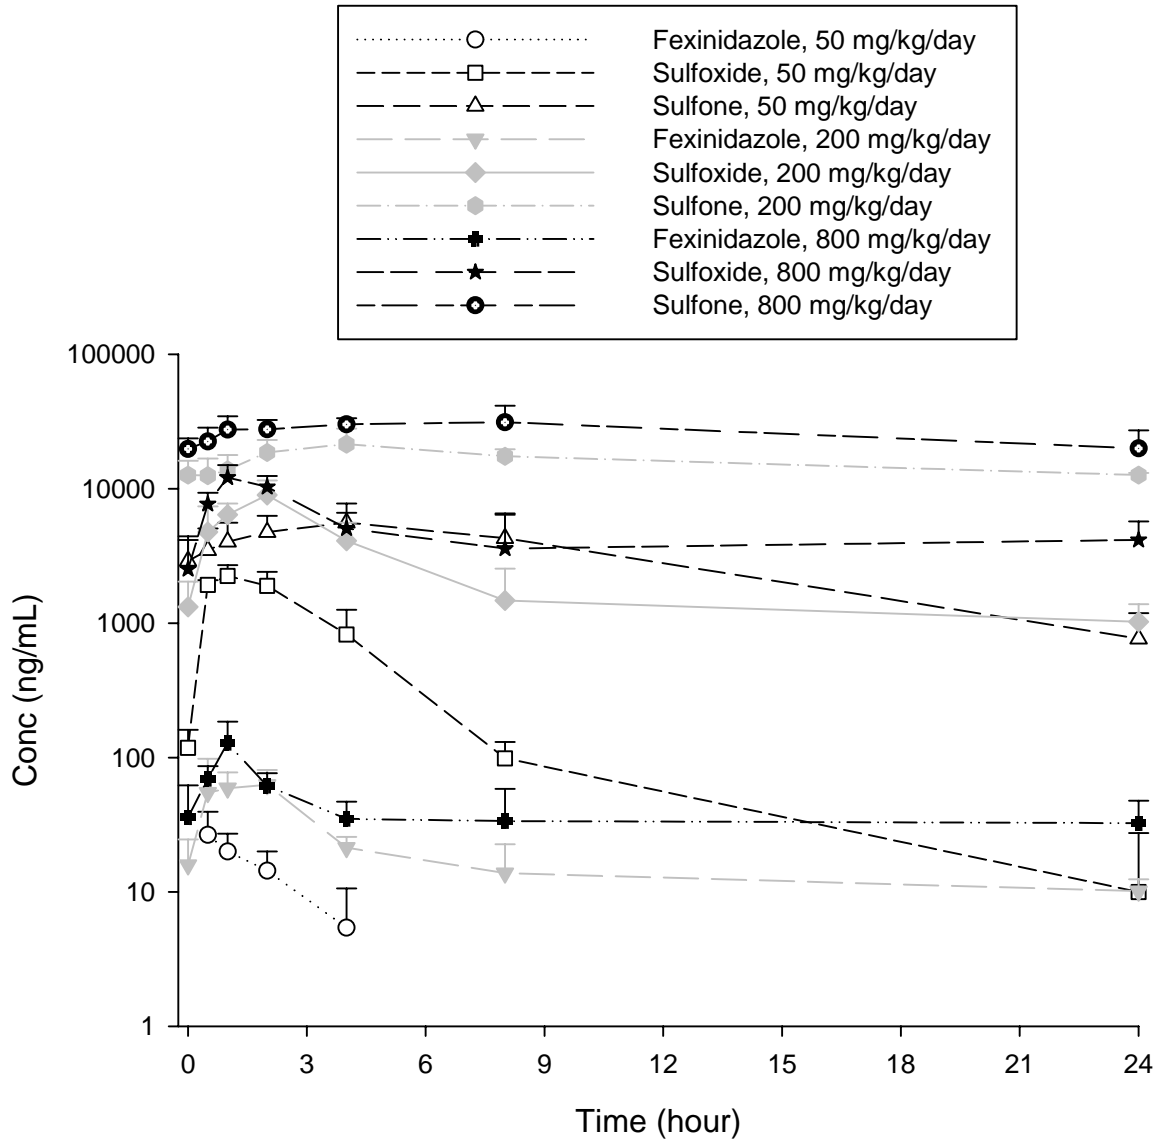

**Figure 19.** Day 14 mean (+SD) plasma concentrations (ng/mL) of Fexinidazole and metabolites after single and repeated oral 50, 200 and 800 mg/kg/day of Fexinidazole in female Beagle dogs.

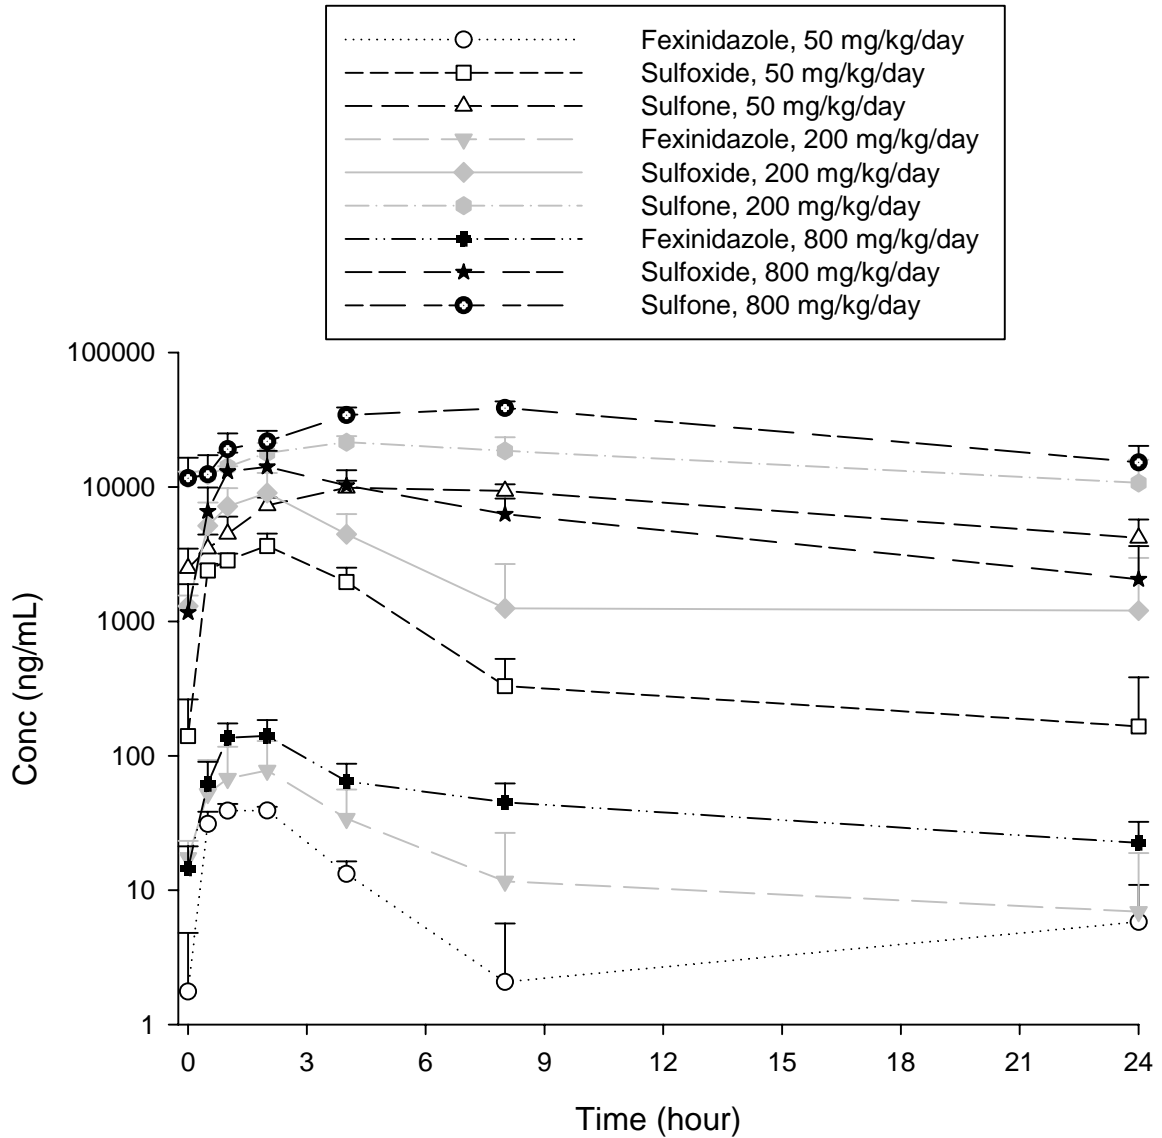

**Figure 20.** Day 28 mean (+SD) plasma concentrations (ng/mL) of Fexinidazole and metabolites after single and repeated oral 50, 200 and 800 mg/kg/day of Fexinidazole in male Beagle dogs.

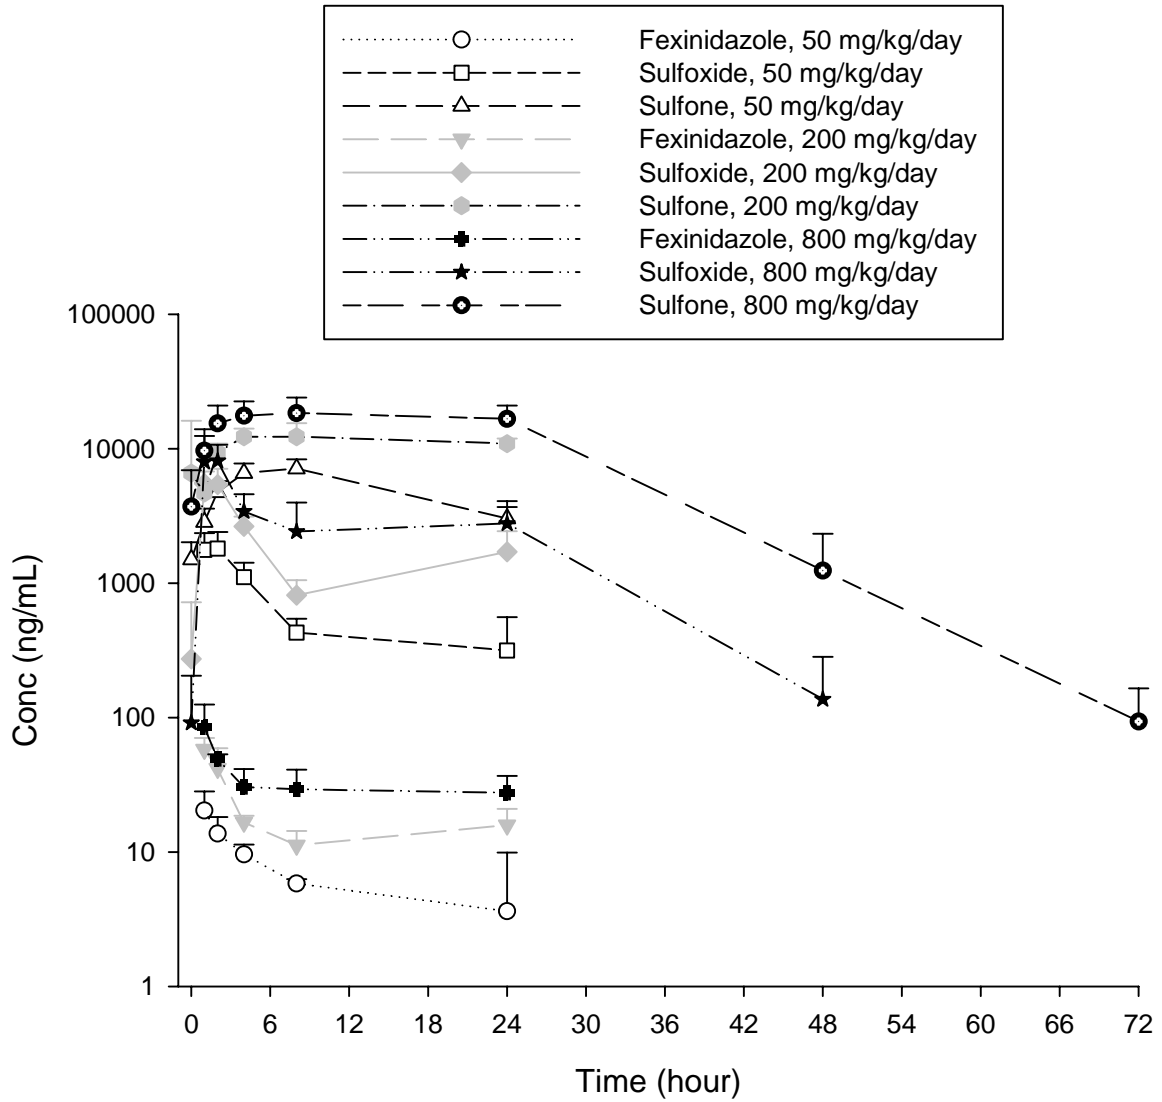

**Figure 21.** Day 28 mean (+SD) plasma concentrations (ng/mL) of Fexinidazole and metabolites after single and repeated oral 50, 200 and 800 mg/kg/day of Fexinidazole in female Beagle dogs.

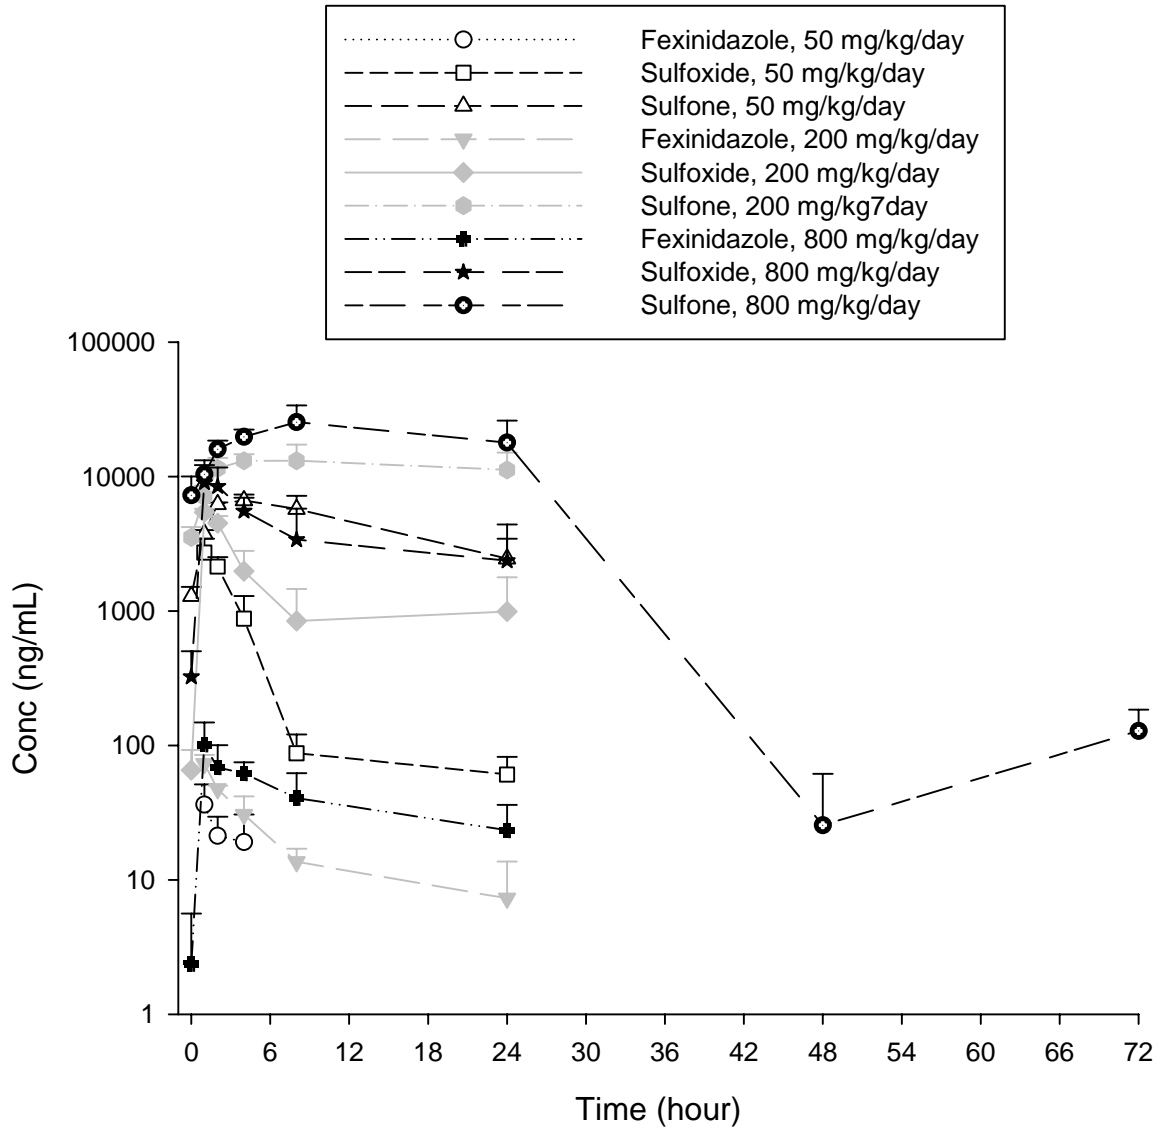

**Figure 22.** Mean ( $\pm$ SD) normalized  $C_{max}$  (upper panel) and  $AUC_{0-t(last)}$  (lower panel) of Fexinidazole after single and repeated oral 50, 200 and 800 mg/kg/day of Fexinidazole in male Beagle dogs.

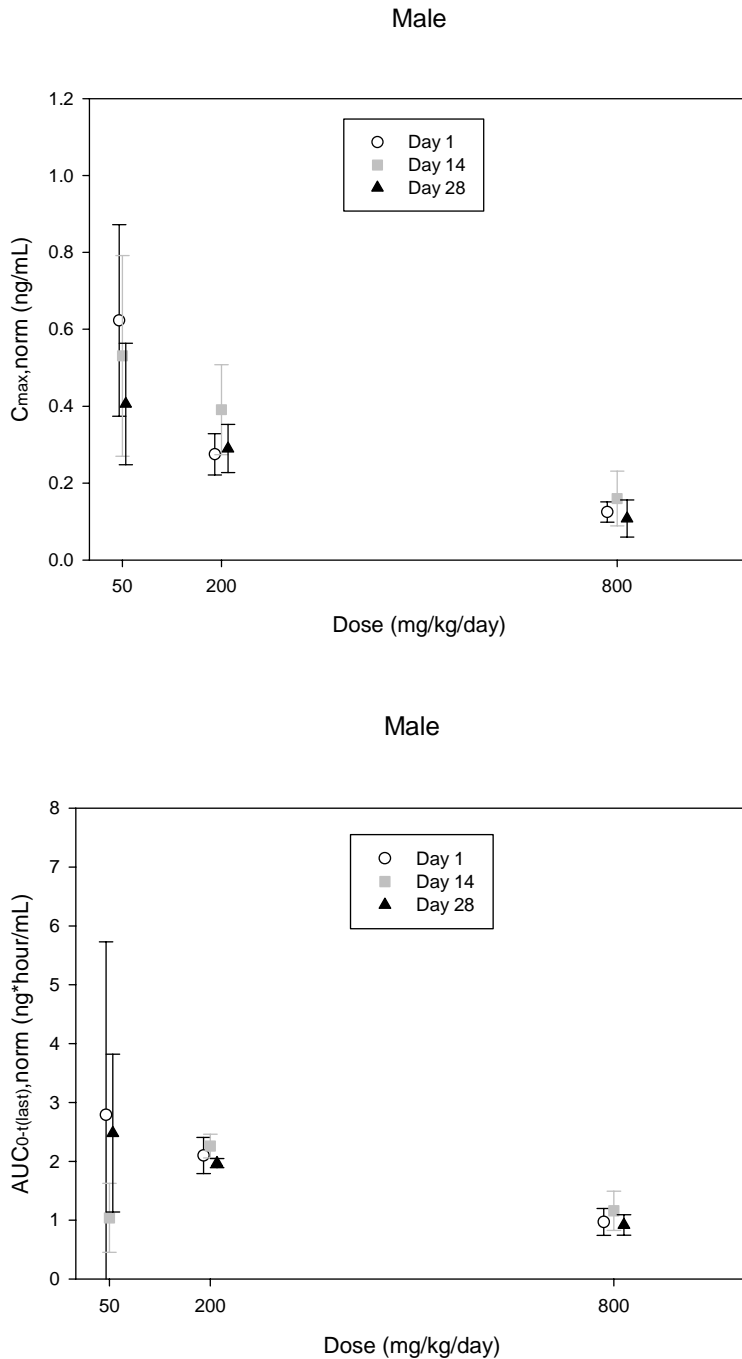

**Figure 23.** Mean ( $\pm$ SD) normalized  $C_{max}$  (upper panel) and  $AUC_{0-t(last)}$  (lower panel) of Fexinidazole after single and repeated oral 50, 200 and 800 mg/kg/day of Fexinidazole in female Beagle dogs.

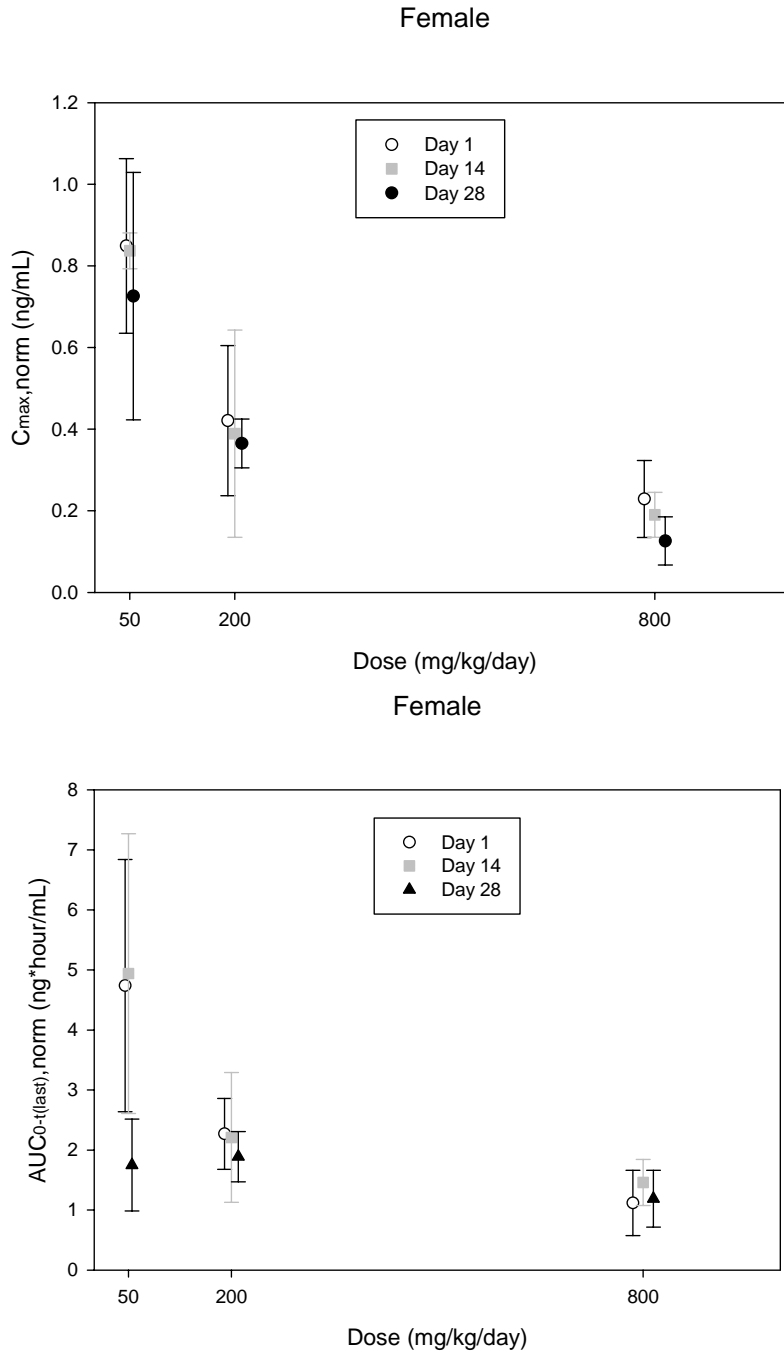

**Figure 24.** Mean ( $\pm$ SD) normalized  $C_{max}$  (upper panel) and  $AUC_{0-t(last)}$  (lower panel) of sulfone derivative after single and repeated oral 50, 200 and 800 mg/kg/day of Fexinidazole in male Beagle dogs.

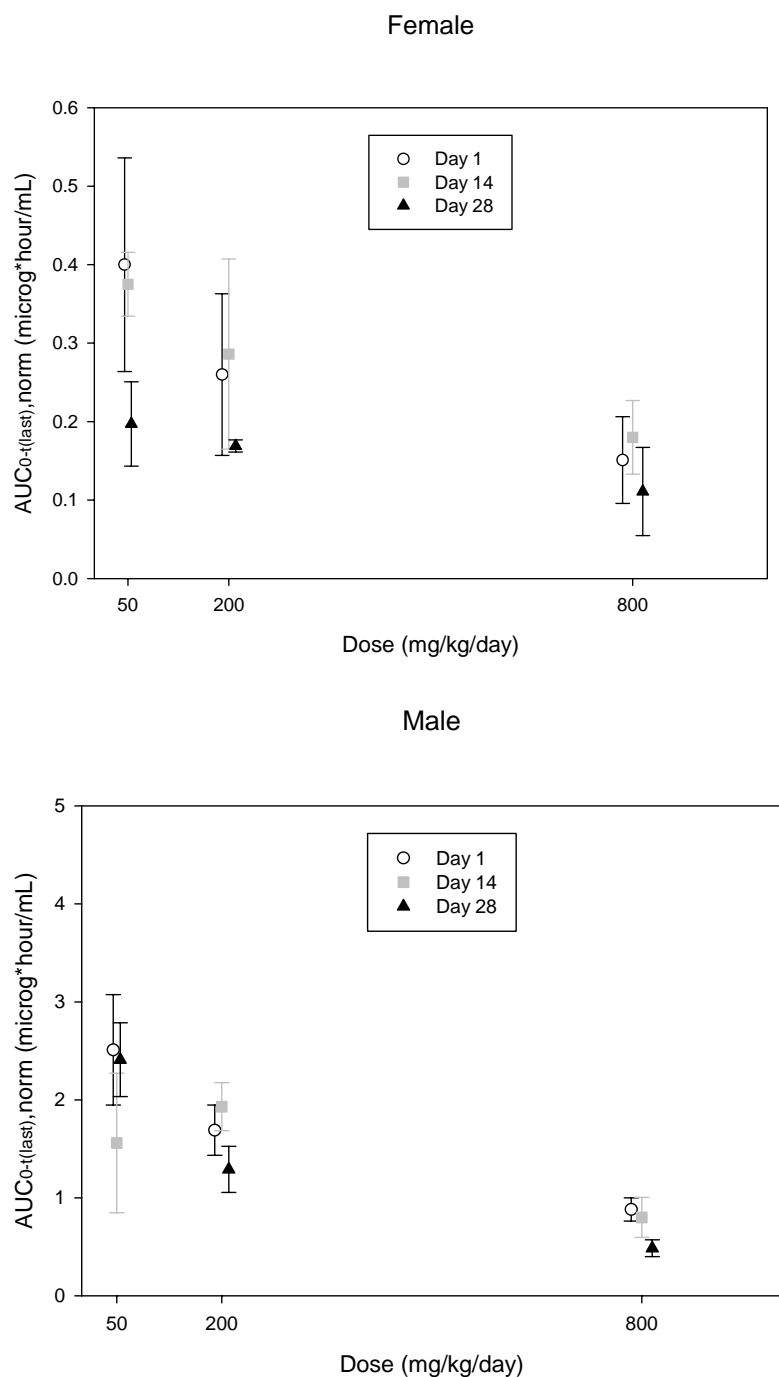



**Figure 25.** Mean ( $\pm$ SD) normalized  $C_{max}$  (upper panel) and  $AUC_{0-t(last)}$  (lower panel) of sulfone derivative after single and repeated oral 50, 200 and 800 mg/kg/day of Fexinidazole in female Beagle dogs.

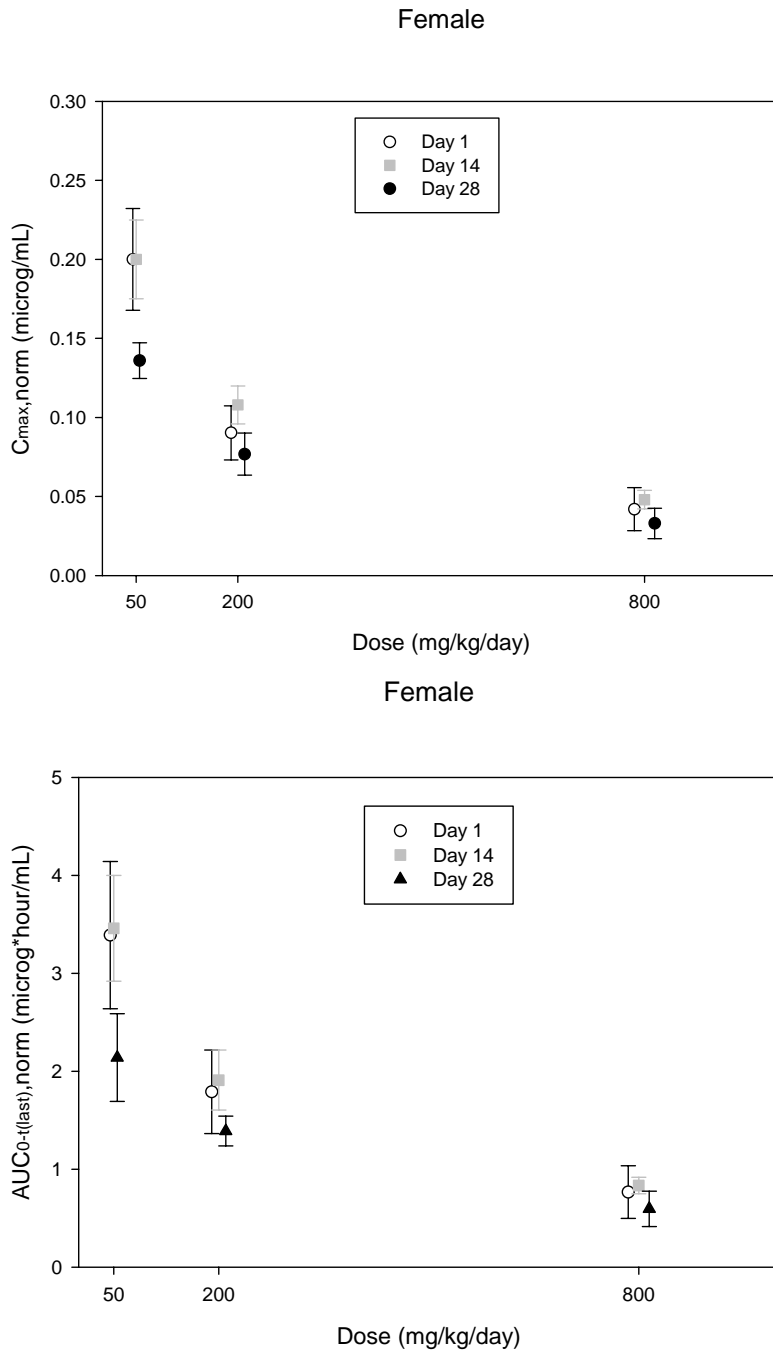

**Figure 26.** Mean ( $\pm$ SD) normalized  $C_{max}$  (upper panel) and  $AUC_{0-t(last)}$  (lower panel) of sulfoxide derivative after single and repeated oral 50, 200 and 800 mg/kg/day of Fexinidazole in male Beagle dogs.

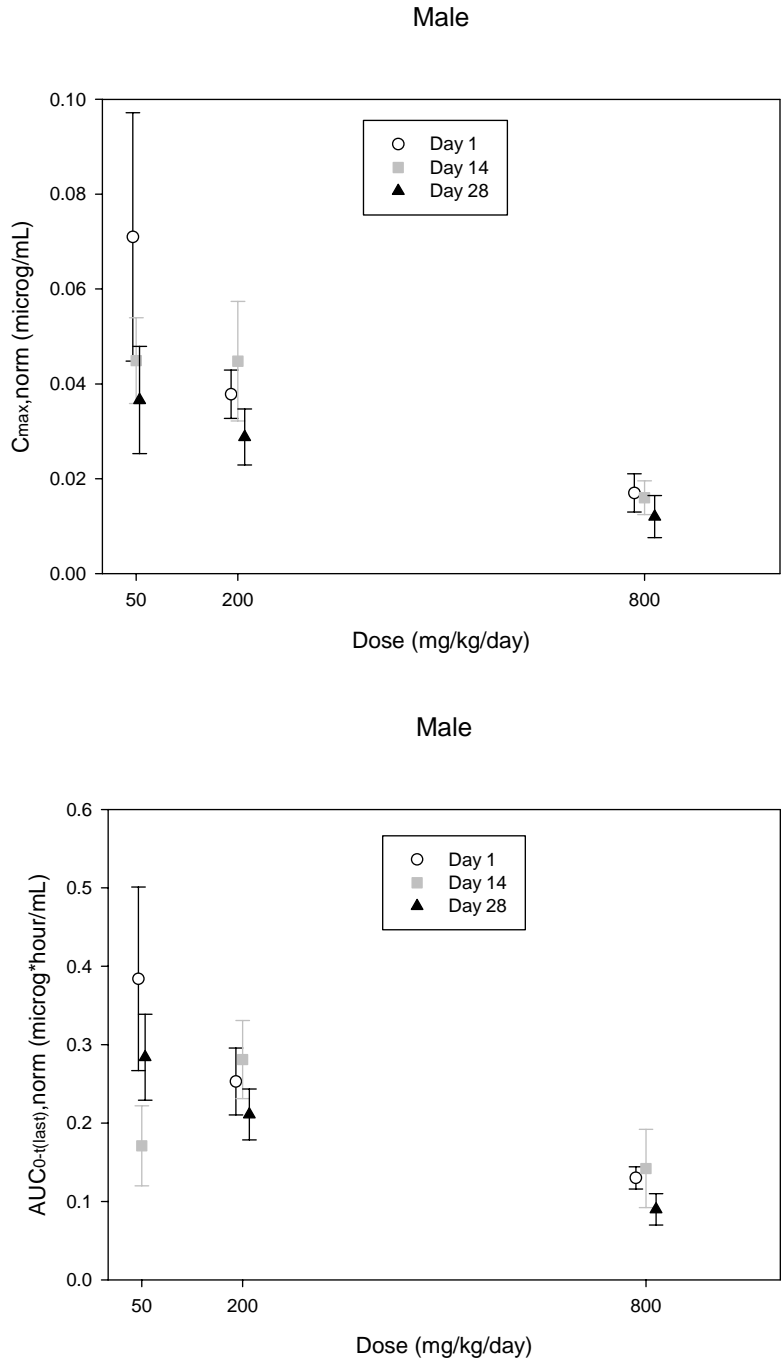

**Figure 27.** Mean ( $\pm$ SD) normalized  $C_{max}$  (upper panel) and  $AUC_{0-t(last)}$  (lower panel) of sulfoxide derivative after single and repeated oral 50, 200 and 800 mg/kg/day of Fexinidazole in female Beagle dogs.

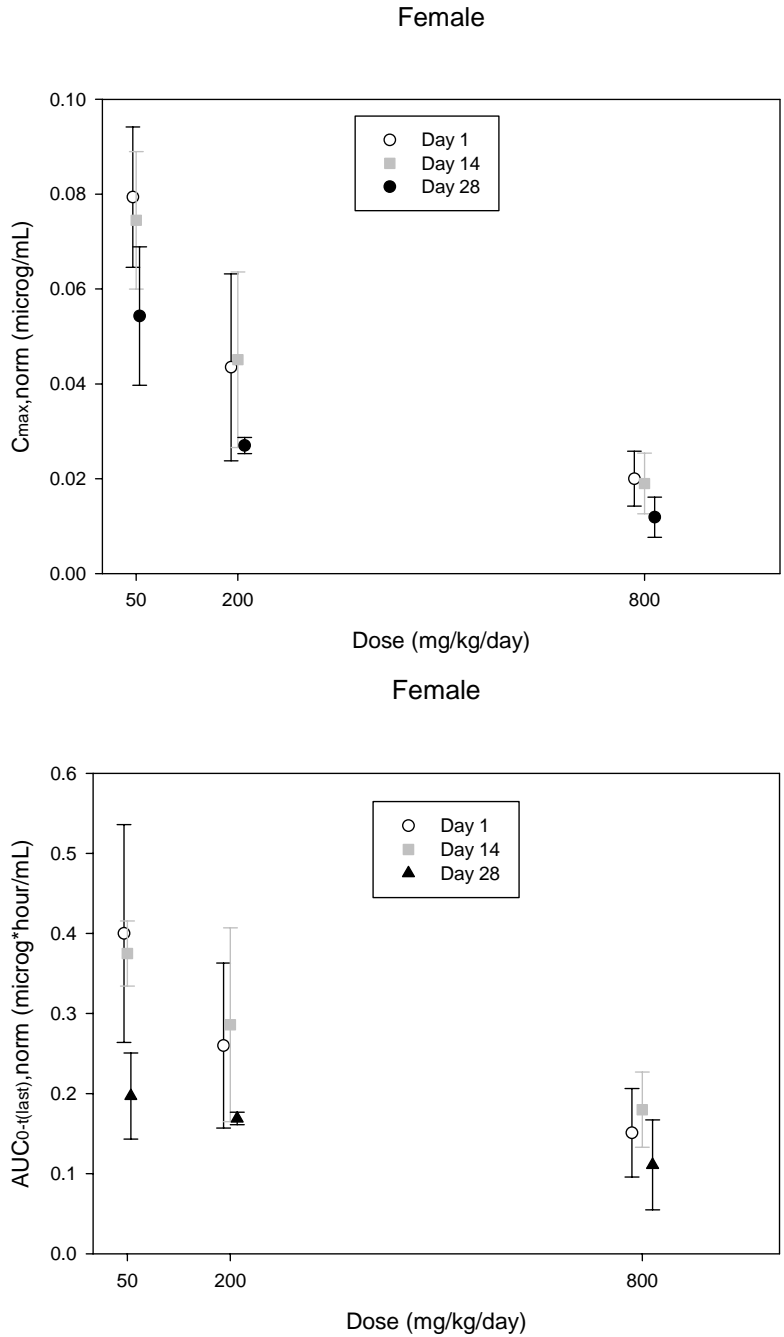

## **APPENDICES**

### **Appendix 1. Individual plasma concentrations**

**Table 1A1.** Individual plasma concentrations (ng/mL) of Fexinidazole after single (Day 1) and repeated (Day 14 and Day 28) oral administrations of the vehicle of Fexinidazole to male and female Beagle dogs.

| Day 1  |        |      |      |      |      |      |      |      |      |      |
|--------|--------|------|------|------|------|------|------|------|------|------|
| Time   | Dog ID |      |      |      |      |      |      |      |      |      |
| (hour) | 2516   | 2518 | 2520 | 2527 | 2533 | 2560 | 2568 | 2572 | 2575 | 2577 |
| 0      | <5     | <5   | <5   | <5   | <5   | <5   | <5   | <5   | <5   | <5   |
| 2      | <5     | <5   | <5   | <5   | <5   | <5   | <5   | <5   | <5   | <5   |

| Day 14 |        |      |      |      |      |      |      |      |      |      |
|--------|--------|------|------|------|------|------|------|------|------|------|
| Time   | Dog ID |      |      |      |      |      |      |      |      |      |
| (hour) | 2516   | 2518 | 2520 | 2527 | 2533 | 2560 | 2568 | 2572 | 2575 | 2577 |
| 0      | <5     | <5   | <5   | <5   | <5   | <5   | <5   | <5   | <5   | <5   |
| 2      | <5     | <5   | <5   | <5   | <5   | <5   | <5   | <5   | <5   | <5   |

| Day 28 |        |      |      |      |      |      |      |      |      |      |
|--------|--------|------|------|------|------|------|------|------|------|------|
| Time   | Dog ID |      |      |      |      |      |      |      |      |      |
| (hour) | 2516   | 2518 | 2520 | 2527 | 2533 | 2560 | 2568 | 2572 | 2575 | 2577 |
| 0      | <5     | <5   | <5   | <5   | <5   | <5   | <5   | <5   | <5   | <5   |
| 2      | <5     | <5   | <5   | <5   | <5   | <5   | <5   | <5   | <5   | <5   |

**Table 2A1.** Individual plasma concentrations (ng/mL) of sulfone metabolite after single (Day 1) and repeated (Day 14 and Day 28) oral administrations of the vehicle of Fexinidazole to male and female Beagle dogs.

| Day 1  |        |      |      |      |      |      |      |      |      |      |
|--------|--------|------|------|------|------|------|------|------|------|------|
| Time   | Dog ID |      |      |      |      |      |      |      |      |      |
| (hour) | 2516   | 2518 | 2520 | 2527 | 2533 | 2560 | 2568 | 2572 | 2575 | 2577 |
| 0      | <25    | <25  | <25  | <25  | <25  | <25  | <25  | <25  | <25  | <25  |
| 2      | <25    | <25  | <25  | <25  | <25  | <25  | <25  | <25  | <25  | <25  |

| Day 14 |        |      |      |      |      |      |      |      |      |      |
|--------|--------|------|------|------|------|------|------|------|------|------|
| Time   | Dog ID |      |      |      |      |      |      |      |      |      |
| (hour) | 2516   | 2518 | 2520 | 2527 | 2533 | 2560 | 2568 | 2572 | 2575 | 2577 |
| 0      | <25    | <25  | <25  | <25  | <25  | <25  | <25  | <25  | <25  | <25  |
| 2      | <25    | <25  | <25  | <25  | <25  | <25  | <25  | <25  | <25  | <25  |

| Day 28 |        |      |      |      |      |      |      |      |      |      |
|--------|--------|------|------|------|------|------|------|------|------|------|
| Time   | Dog ID |      |      |      |      |      |      |      |      |      |
| (hour) | 2516   | 2518 | 2520 | 2527 | 2533 | 2560 | 2568 | 2572 | 2575 | 2577 |
| 0      | <25    | <25  | <25  | <25  | <25  | <25  | <25  | <25  | <25  | <25  |
| 2      | <25    | <25  | <25  | <25  | <25  | <25  | <25  | <25  | <25  | <25  |

**Table 3A1.** Individual plasma concentrations (ng/mL) of sulfoxide metabolite after single (Day 1) and repeated (Day 14 and Day 28) oral administrations of the vehicle of Fexinidazole to male and female Beagle dogs.

| Day 1  |        |      |      |      |      |      |      |      |      |      |
|--------|--------|------|------|------|------|------|------|------|------|------|
| Time   | Dog ID |      |      |      |      |      |      |      |      |      |
| (hour) | 2516   | 2518 | 2520 | 2527 | 2533 | 2560 | 2568 | 2572 | 2575 | 2577 |
| 0      | <25    | <25  | <25  | <25  | <25  | <25  | <25  | <25  | <25  | <25  |
| 2      | <25    | <25  | <25  | <25  | <25  | <25  | <25  | <25  | <25  | <25  |

| Day 14 |        |      |      |      |      |      |      |      |      |      |
|--------|--------|------|------|------|------|------|------|------|------|------|
| Time   | Dog ID |      |      |      |      |      |      |      |      |      |
| (hour) | 2516   | 2518 | 2520 | 2527 | 2533 | 2560 | 2568 | 2572 | 2575 | 2577 |
| 0      | <25    | <25  | <25  | <25  | <25  | <25  | <25  | <25  | <25  | <25  |
| 2      | <25    | <25  | <25  | <25  | <25  | <25  | <25  | <25  | <25  | <25  |

| Day 28 |        |      |      |      |      |      |      |      |      |      |
|--------|--------|------|------|------|------|------|------|------|------|------|
| Time   | Dog ID |      |      |      |      |      |      |      |      |      |
| (hour) | 2516   | 2518 | 2520 | 2527 | 2533 | 2560 | 2568 | 2572 | 2575 | 2577 |
| 0      | <25    | <25  | <25  | <25  | <25  | <25  | <25  | <25  | <25  | <25  |
| 2      | <25    | <25  | <25  | <25  | <25  | <25  | <25  | <25  | <25  | <25  |

**Table 4A1.** Individual plasma concentrations (ng/mL) of Fexinidazole after single (Day 1) and repeated (Day 14 and Day 28) oral administrations of Fexinidazole at the dose of 50 mg/kg/day to male Beagle dogs.

| Time (hour) | ID 2514 | ID 2521 | ID 2529 | Mean  | SD    |
|-------------|---------|---------|---------|-------|-------|
| Day 1       |         |         |         |       |       |
| 0           | <5      | <5      | <5      | N/A   | N/A   |
| 0.5         | 45.5    | 23.1    | 24.9    | 31.2  | 12.4  |
| 1           | 28.3    | 20.0    | 15.6    | 21.3  | 6.45  |
| 2           | 26.0    | 18.1    | 10.1    | 18.1  | 7.95  |
| 4           | 15.2    | 10.4    | 6.38    | 10.7  | 4.42  |
| 8           | <5      | <5      | <5      | N/A   | N/A   |
| 24          | 5.86    | <5      | <5      | 1.95* | 3.38  |
| Day 14      |         |         |         |       |       |
| 0           | <5      | <5      | <5      | N/A   | N/A   |
| 0.5         | 41.4    | 21.1    | 17.1    | 26.5  | 13.0  |
| 1           | 28.2    | 16.6    | 15.2    | 20.0  | 7.14  |
| 2           | 20.6    | 13.0    | 9.70    | 14.4  | 5.59  |
| 4           | 10.4    | 5.84    | <5      | 5.41  | 5.21  |
| 8           | <5      | <5      | <5      | N/A   | N/A   |
| 24          | <5      | <5      | <5      | N/A   | N/A   |
| Day 28      |         |         |         |       |       |
| 0           | <5      | <5      | <5      | N/A   | N/A   |
| 1           | 29.3    | 17.0    | 14.6    | 20.3  | 7.89  |
| 2           | 18.8    | 10.2    | 12.0    | 13.7  | 4.54  |
| 4           | 11.6    | 8.47    | 8.77    | 9.61  | 1.73  |
| 8           | 5.89    | 6.23    | 5.34    | 5.82  | 0.449 |
| 24          | <5      | 10.9    | <5      | 3.63* | 6.29  |

Estimates of mean based on approximation that values below LLOQ are equal to zero. For values marked \*, more than half of the individual levels were below LLOQ; descriptive statistics was reported even if strongly biased.

N/A: not applicable.



**Table 5A1.** Individual plasma concentrations (ng/mL) of Fexinidazole after single (Day 1) and repeated (Day 14 and Day 28) oral administrations of Fexinidazole at the dose of 50 mg/kg/day to female Beagle dogs.

| Time (hour)                                                                                                                                                                                                                                                      | ID 2562 | ID 2563 | ID 2576 | Mean  | SD   |
|------------------------------------------------------------------------------------------------------------------------------------------------------------------------------------------------------------------------------------------------------------------|---------|---------|---------|-------|------|
| Day 1                                                                                                                                                                                                                                                            |         |         |         |       |      |
| 0                                                                                                                                                                                                                                                                | <5      | <5      | <5      | N/A   | N/A  |
| 0.5                                                                                                                                                                                                                                                              | 24.8    | 54.3    | 34.1    | 37.7  | 15.1 |
| 1                                                                                                                                                                                                                                                                | 35.7    | 51.4    | 30.5    | 39.2  | 10.9 |
| 2                                                                                                                                                                                                                                                                | 38.8    | 27.4    | 22.3    | 29.5  | 8.45 |
| 4                                                                                                                                                                                                                                                                | 18.6    | 11.6    | 13.5    | 14.6  | 3.62 |
| 8                                                                                                                                                                                                                                                                | 11.0    | <5      | <5      | 3.67* | 6.35 |
| 24                                                                                                                                                                                                                                                               | 6.79    | <5      | 5.32    | 4.04  | 3.57 |
| Day 14                                                                                                                                                                                                                                                           |         |         |         |       |      |
| 0                                                                                                                                                                                                                                                                | 5.28    | <5      | <5      | 1.76* | 3.05 |
| 0.5                                                                                                                                                                                                                                                              | 37.6    | 32.5    | 23.3    | 31.1  | 7.25 |
| 1                                                                                                                                                                                                                                                                | 44.4    | 35.3    | 37.2    | 39.0  | 4.80 |
| 2                                                                                                                                                                                                                                                                | 36.1    | 40.8    | 40.4    | 39.1  | 2.61 |
| 4                                                                                                                                                                                                                                                                | 9.57    | 14.4    | 15.5    | 13.2  | 3.15 |
| 8                                                                                                                                                                                                                                                                | 6.20    | <5      | <5      | 2.07* | 3.58 |
| 24                                                                                                                                                                                                                                                               | 9.81    | <5      | 7.58    | 5.80  | 5.14 |
| Day 28                                                                                                                                                                                                                                                           |         |         |         |       |      |
| 0                                                                                                                                                                                                                                                                | <5      | <5      | <5      | N/A   | N/A  |
| 1                                                                                                                                                                                                                                                                | 23.5    | 53.0    | 32.4    | 36.3  | 15.1 |
| 2                                                                                                                                                                                                                                                                | 18.0    | 30.6    | 15.2    | 21.3  | 8.20 |
| 4                                                                                                                                                                                                                                                                | 12.4    | 32.5    | 12.3    | 19.1  | 11.6 |
| 8                                                                                                                                                                                                                                                                | <5      | <5      | <5      | N/A   | N/A  |
| 24                                                                                                                                                                                                                                                               | <5      | <5      | <5      | N/A   | N/A  |
| <p>Estimates of mean based on approximation that values below LLOQ are equal to zero. For values marked *, more than half of the individual levels were below LLOQ; descriptive statistics was reported even if strongly biased.</p> <p>N/A: not applicable.</p> |         |         |         |       |      |

**Table 6A1.** Individual plasma concentrations (ng/mL) of Fexinidazole after single (Day 1) and repeated (Day 14 and Day 28) oral administrations of Fexinidazole at the dose of 200 mg/kg/day to male Beagle dogs.

| Time (hour) | ID 2515 | ID 2523 | ID 2526             | Mean | SD   |
|-------------|---------|---------|---------------------|------|------|
| Day 1       |         |         |                     |      |      |
| 0           | <5      | <5      | 25.6 <sup>(1)</sup> | N/A  | N/A  |
| 0.5         | 46.4    | <5      | 51.3                | 32.6 | 28.3 |
| 1           | 35.3    | 30.1    | 50.2                | 38.5 | 10.4 |
| 2           | 38.9    | 67.0    | 42.9                | 49.6 | 15.2 |
| 4           | 21.5    | 25.0    | 19.9                | 22.1 | 2.61 |
| 8           | <5      | 5.71    | 8.09                | 4.60 | 4.16 |
| 24          | 12.2    | 11.8    | 20.8                | 14.9 | 5.08 |
| Day 14      |         |         |                     |      |      |
| 0           | 7.72    | 14.7    | 25.1                | 15.8 | 8.75 |
| 0.5         | 52.6    | 12.6    | 98.8                | 54.7 | 43.1 |
| 1           | 41.5    | 57.2    | 78.4                | 59.0 | 18.5 |
| 2           | 48.1    | 82.9    | 56.9                | 62.6 | 18.1 |
| 4           | 18.6    | 26.3    | 19.0                | 21.3 | 4.33 |
| 8           | 23.9    | 9.89    | 7.59                | 13.8 | 8.83 |
| 24          | 8.08    | 12.6    | 9.57                | 10.1 | 2.30 |
| Day 28      |         |         |                     |      |      |
| 0           | <5      | <5      | <5                  | N/A  | N/A  |
| 1           | 71.2    | 56.1    | 46.3                | 57.9 | 12.5 |
| 2           | 59.7    | 40.4    | 24.9                | 41.7 | 17.4 |
| 4           | 18.9    | 15.3    | 15.5                | 16.6 | 2.02 |
| 8           | 11.3    | 8.05    | 14.3                | 11.2 | 3.13 |
| 24          | 9.86    | 18.5    | 19.0                | 15.8 | 5.14 |

<sup>(1)</sup> Likely due to contamination.

Estimates of mean based on approximation that values below LLOQ are equal to zero.

N/A: not applicable.

**Table 7A1.** Individual plasma concentrations (ng/mL) of Fexinidazole after single (Day 1) and repeated (Day 14 and Day 28) oral administrations of Fexinidazole at the dose of 200 mg/kg/day to female Beagle dogs.

| Time (hour)                                                                                                                                                                                                                                                      | ID 2561 | ID 2570 | ID 2567 | Mean  | SD   |
|------------------------------------------------------------------------------------------------------------------------------------------------------------------------------------------------------------------------------------------------------------------|---------|---------|---------|-------|------|
| Day 1                                                                                                                                                                                                                                                            |         |         |         |       |      |
| 0                                                                                                                                                                                                                                                                | <5      | <5      | <5      | N/A   | N/A  |
| 0.5                                                                                                                                                                                                                                                              | 51.0    | 51.9    | 107     | 70.0  | 32.1 |
| 1                                                                                                                                                                                                                                                                | 57.4    | 69.0    | 126     | 84.1  | 36.7 |
| 2                                                                                                                                                                                                                                                                | 37.0    | 41.8    | 48.0    | 42.3  | 5.51 |
| 4                                                                                                                                                                                                                                                                | 14.4    | 15.7    | 39.2    | 23.1  | 14.0 |
| 8                                                                                                                                                                                                                                                                | 8.98    | 11.9    | 19.6    | 13.5  | 5.49 |
| 24                                                                                                                                                                                                                                                               | 12.5    | 13.9    | 6.61    | 11.0  | 3.87 |
| Day 14                                                                                                                                                                                                                                                           |         |         |         |       |      |
| 0                                                                                                                                                                                                                                                                | 11.0    | 18.8    | 22.5    | 17.4  | 5.87 |
| 0.5                                                                                                                                                                                                                                                              | 27.4    | 30.1    | 99.0    | 52.2  | 40.6 |
| 1                                                                                                                                                                                                                                                                | 40.3    | 37.9    | 124     | 67.4  | 49.0 |
| 2                                                                                                                                                                                                                                                                | 42.9    | 54.2    | 136     | 77.7  | 50.8 |
| 4                                                                                                                                                                                                                                                                | 23.3    | 19.1    | 59.5    | 34.0  | 22.2 |
| 8                                                                                                                                                                                                                                                                | 5.99    | <5      | 28.7    | 11.6  | 15.1 |
| 24                                                                                                                                                                                                                                                               | <5      | 20.7    | <5      | 6.90* | 12.0 |
| Day 28                                                                                                                                                                                                                                                           |         |         |         |       |      |
| 0                                                                                                                                                                                                                                                                | <5      | <5      | <5      | N/A   | N/A  |
| 1                                                                                                                                                                                                                                                                | 84.0    | 60.2    | 74.7    | 73.0  | 12.0 |
| 2                                                                                                                                                                                                                                                                | 44.9    | 50.4    | 47.0    | 47.4  | 2.78 |
| 4                                                                                                                                                                                                                                                                | 33.1    | 18.1    | 40.3    | 30.5  | 11.3 |
| 8                                                                                                                                                                                                                                                                | 17.6    | 11.8    | 11.5    | 13.6  | 3.44 |
| 24                                                                                                                                                                                                                                                               | <5      | 12.1    | 9.75    | 7.28  | 6.42 |
| <p>Estimates of mean based on approximation that values below LLOQ are equal to zero. For values marked *, more than half of the individual levels were below LLOQ; descriptive statistics was reported even if strongly biased.</p> <p>N/A: not applicable.</p> |         |         |         |       |      |

**Table 8A1.** Individual plasma concentrations (ng/mL) of Fexinidazole after single (Day 1) and repeated (Day 14 and Day 28) oral administrations of Fexinidazole at the dose of 800 mg/kg/day to male Beagle dogs.

| Time (hour)                                                                                                                                                                                                                                                      | ID 2517 | ID 2519 | ID 2525 | ID 2528 | ID 2530 | Mean  | SD   |
|------------------------------------------------------------------------------------------------------------------------------------------------------------------------------------------------------------------------------------------------------------------|---------|---------|---------|---------|---------|-------|------|
| Day 1                                                                                                                                                                                                                                                            |         |         |         |         |         |       |      |
| 0                                                                                                                                                                                                                                                                | <5      | <5      | 9.75    | 59.5    | <5      | 13.9* | 25.9 |
| 0.5                                                                                                                                                                                                                                                              | 132     | 73.8    | 47.8    | 97.0    | 40.0    | 78.1  | 37.6 |
| 1                                                                                                                                                                                                                                                                | 86.0    | 108     | 60.4    | 98.8    | 81.5    | 86.9  | 18.2 |
| 2                                                                                                                                                                                                                                                                | 55.6    | 85.2    | 80.8    | 74.1    | 56.4    | 70.4  | 13.7 |
| 4                                                                                                                                                                                                                                                                | 15.5    | 51.8    | 25.5    | 44.6    | 25.5    | 32.6  | 15.0 |
| 8                                                                                                                                                                                                                                                                | 15.5    | 14.2    | 24.6    | 34.3    | 27.8    | 23.3  | 8.46 |
| 24                                                                                                                                                                                                                                                               | 26.8    | 9.99    | 37.2    | 44.9    | 28.5    | 29.5  | 13.1 |
| Day 14                                                                                                                                                                                                                                                           |         |         |         |         |         |       |      |
| 0                                                                                                                                                                                                                                                                | 74.9    | 10.5    | 15.2    | 46.6    | 32.3    | 35.9  | 26.1 |
| 0.5                                                                                                                                                                                                                                                              | 74.3    | 80.9    | 51.9    | 87.8    | 52.1    | 69.4  | 16.6 |
| 1                                                                                                                                                                                                                                                                | 130     | 220     | 75.1    | 127     | 86.9    | 128   | 56.9 |
| 2                                                                                                                                                                                                                                                                | 72.8    | 78.0    | 42.6    | 50.3    | 63.7    | 61.5  | 14.9 |
| 4                                                                                                                                                                                                                                                                | 35.1    | 29.3    | 55.2    | 24.0    | 30.2    | 34.8  | 12.1 |
| 8                                                                                                                                                                                                                                                                | 30.9    | 11.9    | 7.75    | 53.4    | 63.8    | 33.6  | 24.8 |
| 24                                                                                                                                                                                                                                                               | 57.5    | 16.4    | 27.2    | 31.7    | 29.0    | 32.4  | 15.2 |
| Day 28                                                                                                                                                                                                                                                           |         |         |         |         |         |       |      |
| 0                                                                                                                                                                                                                                                                | <5      | <5      | <5      | <5      | <5      | N/A   | N/A  |
| 1                                                                                                                                                                                                                                                                | 141     | 54.1    | 107     | 40.5    | 80.4    | 84.6  | 40.5 |
| 2                                                                                                                                                                                                                                                                | 55.7    | 44.8    | 48.3    | 48.4    | 49.5    | 49.3  | 3.97 |
| 4                                                                                                                                                                                                                                                                | 49.2    | 27.2    | 21.1    | 24.1    | 30.5    | 30.4  | 11.1 |
| 8                                                                                                                                                                                                                                                                | 40.3    | 37.6    | 26.7    | 31.5    | 10.6    | 29.3  | 11.7 |
| 24                                                                                                                                                                                                                                                               | 24.4    | 35.2    | 23.6    | 16.1    | 38.8    | 27.6  | 9.24 |
| 48                                                                                                                                                                                                                                                               |         |         |         | <5      | <5      | N/A   | N/A  |
| 72                                                                                                                                                                                                                                                               |         |         |         | <5      | <5      | N/A   | N/A  |
| <p>Estimates of mean based on approximation that values below LLOQ are equal to zero. For values marked *, more than half of the individual levels were below LLOQ; descriptive statistics was reported even if strongly biased.</p> <p>N/A: not applicable.</p> |         |         |         |         |         |       |      |

**Table 9A1.** Individual plasma concentrations (ng/mL) of Fexinidazole after single (Day 1) and repeated (Day 14 and Day 28) oral administrations of Fexinidazole at the dose of 800 mg/kg/day to female Beagle dogs.

| Time (hour)                                                                                                                                                                                                                                                      | ID 2564 | ID 2565 | ID 2569 | ID 2571 | ID 2573 | Mean  | SD   |
|------------------------------------------------------------------------------------------------------------------------------------------------------------------------------------------------------------------------------------------------------------------|---------|---------|---------|---------|---------|-------|------|
| Day 1                                                                                                                                                                                                                                                            |         |         |         |         |         |       |      |
| 0                                                                                                                                                                                                                                                                | <5      | <5      | <5      | <5      | <5      | N/A   | N/A  |
| 0.5                                                                                                                                                                                                                                                              | 156     | 115     | 89.8    | 45.5    | 57.0    | 92.7  | 44.8 |
| 1                                                                                                                                                                                                                                                                | 293     | 195     | 128     | 135     | 129     | 176   | 71.1 |
| 2                                                                                                                                                                                                                                                                | 96.9    | 233     | 59.6    | 52.4    | 80.7    | 105   | 73.9 |
| 4                                                                                                                                                                                                                                                                | 39.7    | 124     | 29.8    | 21.3    | 25.8    | 48.1  | 43.0 |
| 8                                                                                                                                                                                                                                                                | 32.9    | 40.9    | 29.5    | 11.4    | 9.08    | 24.8  | 13.9 |
| 24                                                                                                                                                                                                                                                               | <5      | 30.1    | 54.1    | 44.4    | 8.04    | 27.3  | 23.1 |
| Day 14                                                                                                                                                                                                                                                           |         |         |         |         |         |       |      |
| 0                                                                                                                                                                                                                                                                | 10.7    | 22.4    | 5.14    | 17.5    | 16.6    | 14.5  | 6.67 |
| 0.5                                                                                                                                                                                                                                                              | 96.7    | 74.8    | 30.0    | 33.8    | 72.5    | 61.6  | 28.7 |
| 1                                                                                                                                                                                                                                                                | 194     | 134     | 139     | 89.2    | 124     | 136   | 37.8 |
| 2                                                                                                                                                                                                                                                                | 161     | 171     | 182     | 79.2    | 109     | 140   | 44.2 |
| 4                                                                                                                                                                                                                                                                | 53.4    | 99.3    | 72.2    | 58.3    | 39.1    | 64.5  | 22.8 |
| 8                                                                                                                                                                                                                                                                | 39.5    | 73.5    | 27.2    | 41.0    | 43.9    | 45.0  | 17.2 |
| 24                                                                                                                                                                                                                                                               | 34.9    | 28.2    | 16.7    | 9.66    | 22.6    | 22.4  | 9.81 |
| Day 28                                                                                                                                                                                                                                                           |         |         |         |         |         |       |      |
| 0                                                                                                                                                                                                                                                                | <5      | <5      | <5      | 5.26    | 6.52    | 2.36* | 3.26 |
| 1                                                                                                                                                                                                                                                                | 94.7    | 179     | 102     | 69.5    | 59.0    | 101   | 47.1 |
| 2                                                                                                                                                                                                                                                                | 55.2    | 125     | 50.1    | 62.4    | 50.7    | 68.7  | 31.9 |
| 4                                                                                                                                                                                                                                                                | 58.2    | 82.3    | 66.0    | 49.0    | 53.0    | 61.7  | 13.2 |
| 8                                                                                                                                                                                                                                                                | 14.5    | 61.3    | 64.4    | 27.8    | 34.7    | 40.5  | 21.6 |
| 24                                                                                                                                                                                                                                                               | 25.3    | 44.5    | 18.7    | 15.6    | 12.2    | 23.3  | 12.8 |
| 48                                                                                                                                                                                                                                                               |         |         |         | <5      | <5      | N/A   | N/A  |
| 72                                                                                                                                                                                                                                                               |         |         |         | <5      | <5      | N/A   | N/A  |
| <p>Estimates of mean based on approximation that values below LLOQ are equal to zero. For values marked *, more than half of the individual levels were below LLOQ; descriptive statistics was reported even if strongly biased.</p> <p>N/A: not applicable.</p> |         |         |         |         |         |       |      |

**Table 10A1.** Individual plasma concentrations ( $\mu\text{g/mL}$ ) of sulfone metabolite after single (Day 1) and repeated (Day 14 and Day 28) oral administrations of Fexinidazole at the dose of 50 mg/kg/day to male Beagle dogs.

| Time (hour)          | ID 2514 | ID 2521 | ID 2529 | Mean  | SD    |
|----------------------|---------|---------|---------|-------|-------|
| Day 1                |         |         |         |       |       |
| 0                    | <0.025  | <0.025  | <0.025  | N/A   | N/A   |
| 0.5                  | 1.13    | 0.650   | 0.882   | 0.887 | 0.240 |
| 1                    | 2.18    | 1.39    | 2.00    | 1.86  | 0.414 |
| 2                    | 5.25    | 3.00    | 4.08    | 4.11  | 1.13  |
| 4                    | 8.04    | 5.93    | 5.45    | 6.47  | 1.38  |
| 8                    | 9.17    | 6.33    | 6.02    | 7.17  | 1.74  |
| 24                   | 4.00    | 2.47    | 3.46    | 3.31  | 0.776 |
| Day 14               |         |         |         |       |       |
| 0                    | 4.48    | 2.75    | 1.46    | 2.90  | 1.52  |
| 0.5                  | 5.16    | 3.24    | 2.07    | 3.49  | 1.56  |
| 1                    | 5.77    | 3.54    | 2.78    | 4.03  | 1.55  |
| 2                    | 6.46    | 4.21    | 3.57    | 4.75  | 1.52  |
| 4                    | 8.09    | 4.44    | 4.18    | 5.57  | 2.19  |
| 8                    | 6.60    | 3.80    | 2.40    | 4.27  | 2.14  |
| 24                   | 1.17    | 0.791   | 0.336   | 0.766 | 0.418 |
| Day 28               |         |         |         |       |       |
| 0                    | 1.75    | 1.85    | 0.904   | 1.50  | 0.520 |
| 1                    | 3.55    | 2.94    | 2.07    | 2.85  | 0.744 |
| 2                    | 5.85    | 4.52    | 3.88    | 4.75  | 1.00  |
| 4                    | 7.91    | 6.22    | 5.63    | 6.59  | 1.18  |
| 8                    | 8.43    | 6.87    | 6.04    | 7.11  | 1.21  |
| 24                   | 2.88    | 3.75    | 2.44    | 3.02  | 0.667 |
| N/A: not applicable. |         |         |         |       |       |

**Table 11A1.** Individual plasma concentrations ( $\mu\text{g/mL}$ ) of sulfone metabolite after single (Day 1) and repeated (Day 14 and Day 28) oral administrations of Fexinidazole at the dose of 50 mg/kg/day to female Beagle dogs.

| Time (hour) | ID 2562 | ID 2563 | ID 2576 | Mean | SD    |
|-------------|---------|---------|---------|------|-------|
| Day 1       |         |         |         |      |       |
| 0           | <0.025  | <0.025  | <0.025  | N/A  | N/A   |
| 0.5         | 0.688   | 1.26    | 1.40    | 1.12 | 0.377 |
| 1           | 2.13    | 2.74    | 2.13    | 2.33 | 0.352 |
| 2           | 5.74    | 6.02    | 5.43    | 5.73 | 0.295 |
| 4           | 8.15    | 8.32    | 8.45    | 8.31 | 0.150 |
| 8           | 11.5    | 6.89    | 10.2    | 9.53 | 2.38  |
| 24          | 6.07    | 2.69    | 5.64    | 4.80 | 1.84  |
| Day 14      |         |         |         |      |       |
| 0           | 3.20    | 2.89    | 1.35    | 2.48 | 0.991 |
| 0.5         | 4.49    | 3.31    | 2.61    | 3.47 | 0.950 |
| 1           | 6.22    | 3.85    | 3.37    | 4.48 | 1.53  |
| 2           | 8.34    | 6.22    | 7.27    | 7.28 | 1.06  |
| 4           | 10.3    | 8.43    | 10.8    | 9.84 | 1.25  |
| 8           | 10.6    | 8.54    | 8.86    | 9.33 | 1.11  |
| 24          | 5.84    | 3.93    | 2.74    | 4.17 | 1.56  |
| Day 28      |         |         |         |      |       |
| 0           | 1.46    | 1.37    | 1.04    | 1.29 | 0.221 |
| 1           | 3.58    | 4.04    | 3.66    | 3.76 | 0.246 |
| 2           | 6.01    | 6.18    | 6.44    | 6.21 | 0.217 |
| 4           | 6.50    | 7.43    | 6.03    | 6.65 | 0.712 |
| 8           | 4.04    | 6.75    | 6.36    | 5.72 | 1.47  |
| 24          | 1.56    | 3.53    | 2.26    | 2.45 | 0.999 |

N/A: not applicable.

**Table 12A1.** Individual plasma concentrations ( $\mu\text{g/mL}$ ) of sulfone metabolite after single (Day 1) and repeated (Day 14 and Day 28) oral administrations of Fexinidazole at the dose of 200 mg/kg/day to male Beagle dogs.

| Time (hour)          | ID 2515 | ID 2523 | ID 2526 | Mean  | SD    |
|----------------------|---------|---------|---------|-------|-------|
| Day 1                |         |         |         |       |       |
| 0                    | <0.025  | <0.025  | <0.025  | N/A   | N/A   |
| 0.5                  | 1.30    | 0.0676  | 1.33    | 0.899 | 0.720 |
| 1                    | 3.32    | 1.55    | 3.82    | 2.90  | 1.19  |
| 2                    | 6.43    | 6.49    | 9.25    | 7.39  | 1.61  |
| 4                    | 10.3    | 16.1    | 15.3    | 13.9  | 3.14  |
| 8                    | 12.3    | 16.4    | 19.1    | 15.9  | 3.42  |
| 24                   | 16.0    | 12.7    | 17.5    | 15.4  | 2.46  |
| Day 14               |         |         |         |       |       |
| 0                    | 9.88    | 11.2    | 16.6    | 12.6  | 3.56  |
| 0.5                  | 8.65    | 11.9    | 17.0    | 12.5  | 4.21  |
| 1                    | 9.32    | 15.2    | 17.0    | 13.8  | 4.02  |
| 2                    | 14.9    | 17.5    | 23.5    | 18.6  | 4.41  |
| 4                    | 13.9    | 24.2    | 26.1    | 21.4  | 6.56  |
| 8                    | 15.6    | 16.7    | 20.0    | 17.4  | 2.29  |
| 24                   | 12.8    | 12.9    | 12.0    | 12.6  | 0.493 |
| Day 28               |         |         |         |       |       |
| 0                    | 1.37    | 0.840   | 17.6    | 6.60  | 9.53  |
| 1                    | 4.47    | 3.90    | 5.71    | 4.69  | 0.925 |
| 2                    | 8.89    | 8.06    | 11.1    | 9.35  | 1.57  |
| 4                    | 11.5    | 11.1    | 14.4    | 12.3  | 1.80  |
| 8                    | 13.3    | 8.70    | 14.9    | 12.3  | 3.22  |
| 24                   | 10.2    | 10.5    | 12.1    | 10.9  | 1.02  |
| N/A: not applicable. |         |         |         |       |       |



**Table 13A1.** Individual plasma concentrations ( $\mu\text{g/mL}$ ) of sulfone metabolite after single (Day 1) and repeated (Day 14 and Day 28) oral administrations of Fexinidazole at the dose of 200 mg/kg/day to female Beagle dogs.

| Time (hour)          | ID 2561 | ID 2570 | ID 2567 | Mean | SD    |
|----------------------|---------|---------|---------|------|-------|
| Day 1                |         |         |         |      |       |
| 0                    | <0.025  | <0.025  | <0.025  | N/A  | N/A   |
| 0.5                  | 1.87    | 1.75    | 2.75    | 2.12 | 0.546 |
| 1                    | 2.98    | 4.24    | 6.34    | 4.52 | 1.70  |
| 2                    | 8.41    | 13.3    | 12.0    | 11.2 | 2.53  |
| 4                    | 14.4    | 16.4    | 17.0    | 15.9 | 1.36  |
| 8                    | 13.3    | 15.9    | 22.0    | 17.1 | 4.47  |
| 24                   | 15.8    | 8.40    | 20.1    | 14.8 | 5.92  |
| Day 14               |         |         |         |      |       |
| 0                    | 13.2    | 10.5    | 10.8    | 11.5 | 1.48  |
| 0.5                  | 12.5    | 11.2    | 12.9    | 12.2 | 0.889 |
| 1                    | 14.1    | 14.0    | 14.3    | 14.1 | 0.153 |
| 2                    | 15.4    | 16.6    | 21.6    | 17.9 | 3.29  |
| 4                    | 19.3    | 21.2    | 24.0    | 21.5 | 2.36  |
| 8                    | 15.1    | 16.3    | 24.1    | 18.5 | 4.89  |
| 24                   | 7.52    | 16.7    | 7.79    | 10.7 | 5.22  |
| Day 28               |         |         |         |      |       |
| 0                    | 2.75    | 4.04    | 3.79    | 3.53 | 0.684 |
| 1                    | 8.58    | 5.69    | 7.00    | 7.09 | 1.45  |
| 2                    | 14.0    | 9.56    | 10.9    | 11.5 | 2.28  |
| 4                    | 14.8    | 11.8    | 12.6    | 13.1 | 1.55  |
| 8                    | 17.9    | 9.94    | 11.6    | 13.1 | 4.20  |
| 24                   | 8.18    | 15.6    | 9.94    | 11.2 | 3.88  |
| N/A: not applicable. |         |         |         |      |       |

**Table 14A1.** Individual plasma concentrations ( $\mu\text{g/mL}$ ) of sulfone metabolite after single (Day 1) and repeated (Day 14 and Day 28) oral administrations of Fexinidazole at the dose of 800 mg/kg/day to male Beagle dogs.

| Time (hour)          | ID 2517 | ID 2519 | ID 2525 | ID 2528 | ID 2530 | Mean   | SD     |
|----------------------|---------|---------|---------|---------|---------|--------|--------|
| Day 1                |         |         |         |         |         |        |        |
| 0                    | <0.025  | <0.025  | <0.025  | <0.025  | <0.025  | N/A    | N/A    |
| 0.5                  | 6.69    | 1.53    | 1.73    | 3.38    | 1.40    | 2.95   | 2.24   |
| 1                    | 14.5    | 4.86    | 5.62    | 7.18    | 4.31    | 7.29   | 4.17   |
| 2                    | 25.3    | 12.3    | 12.7    | 16.8    | 11.5    | 15.7   | 5.74   |
| 4                    | 30.3    | 25.2    | 23.8    | 25.8    | 20.4    | 25.1   | 3.58   |
| 8                    | 30.8    | 37.2    | 33.8    | 33.0    | 36.5    | 34.3   | 2.62   |
| 24                   | 39.8    | 9.17    | 43.0    | 36.4    | 31.9    | 32.1   | 13.4   |
| Day 14               |         |         |         |         |         |        |        |
| 0                    | 18.9    | 13.5    | 19.8    | 23.6    | 22.5    | 19.7   | 3.94   |
| 0.5                  | 25.2    | 15.3    | 18.0    | 30.5    | 23.1    | 22.4   | 5.99   |
| 1                    | 30.2    | 21.4    | 22.1    | 38.4    | 25.4    | 27.5   | 7.02   |
| 2                    | 25.6    | 21.1    | 28.2    | 34.2    | 29.0    | 27.6   | 4.80   |
| 4                    | 33.8    | 25.3    | 29.8    | 29.2    | 32.5    | 30.1   | 3.29   |
| 8                    | 27.2    | 21.4    | 23.5    | 42.5    | 41.5    | 31.2   | 10.1   |
| 24                   | 27.9    | 10.3    | 14.6    | 24.1    | 22.4    | 19.9   | 7.21   |
| Day 28               |         |         |         |         |         |        |        |
| 0                    | 0.978   | 1.06    | 7.36    | 2.08    | 7.06    | 3.71   | 3.23   |
| 1                    | 10.6    | 2.91    | 14.1    | 12.2    | 8.46    | 9.65   | 4.30   |
| 2                    | 21.2    | 7.27    | 13.7    | 19.7    | 14.9    | 15.4   | 5.51   |
| 4                    | 19.3    | 8.92    | 20.0    | 20.7    | 19.3    | 17.6   | 4.91   |
| 8                    | 19.7    | 12.7    | 17.0    | 27.3    | 15.3    | 18.4   | 5.59   |
| 24                   | 21.4    | 16.0    | 19.3    | 10.2    | 16.6    | 16.7   | 4.23   |
| 48                   |         |         |         | 0.475   | 2.01    | 1.24   | 1.09   |
| 72                   |         |         |         | 0.0428  | 0.144   | 0.0934 | 0.0716 |
| N/A: not applicable. |         |         |         |         |         |        |        |

**Table 15A1.** Individual plasma concentrations ( $\mu\text{g/mL}$ ) of sulfone metabolite after single (Day 1) and repeated (Day 14 and Day 28) oral administrations of Fexinidazole at the dose of 800 mg/kg/day to female Beagle dogs.

| Time (hour)                                                                                                  | ID 2564 | ID 2565 | ID 2569 | ID 2571 | ID 2573 | Mean   | SD     |
|--------------------------------------------------------------------------------------------------------------|---------|---------|---------|---------|---------|--------|--------|
| Day 1                                                                                                        |         |         |         |         |         |        |        |
| 0                                                                                                            | <0.025  | <0.025  | <0.025  | <0.025  | <0.025  | N/A    | N/A    |
| 0.5                                                                                                          | 2.67    | 2.43    | 2.90    | 1.31    | 1.62    | 2.19   | 0.688  |
| 1                                                                                                            | 6.45    | 5.78    | 6.86    | 5.09    | 5.41    | 5.92   | 0.730  |
| 2                                                                                                            | 16.5    | 16.9    | 14.8    | 10.2    | 13.7    | 14.4   | 2.69   |
| 4                                                                                                            | 29.2    | 38.7    | 27.8    | 18.0    | 20.0    | 26.7   | 8.25   |
| 8                                                                                                            | 35.0    | 44.9    | 43.1    | 21.7    | 21.1    | 33.2   | 11.4   |
| 24                                                                                                           | 15.4    | 31.5    | 33.5    | 23.8    | 5.44    | 21.9   | 11.7   |
| Day 14                                                                                                       |         |         |         |         |         |        |        |
| 0                                                                                                            | 11.9    | 13.9    | 3.20    | 15.2    | 13.8    | 11.6   | 4.84   |
| 0.5                                                                                                          | 14.6    | 13.8    | 4.02    | 16.5    | 12.9    | 12.4   | 4.85   |
| 1                                                                                                            | 24.9    | 20.7    | 9.46    | 22.0    | 18.2    | 19.1   | 5.88   |
| 2                                                                                                            | 27.3    | 21.5    | 15.4    | 23.2    | 21.8    | 21.8   | 4.28   |
| 4                                                                                                            | 36.9    | 41.0    | 32.0    | 32.0    | 29.0    | 34.2   | 4.75   |
| 8                                                                                                            | 37.3    | 47.0    | 36.1    | 37.2    | 35.6    | 38.6   | 4.73   |
| 24                                                                                                           | 17.8    | 14.3    | 18.9    | 6.89    | 18.2    | 15.2   | 4.98   |
| Day 28                                                                                                       |         |         |         |         |         |        |        |
| 0                                                                                                            | 7.38    | 4.88    | 10.9    | 4.30    | 8.83    | 7.26   | 2.75   |
| 1                                                                                                            | 11.7    | 9.22    | 14.3    | 6.83    | 9.70    | 10.4   | 2.81   |
| 2                                                                                                            | 16.4    | 18.1    | 18.6    | 13.0    | 13.7    | 16.0   | 2.53   |
| 4                                                                                                            | 18.2    | 22.4    | 22.7    | 17.5    | 17.5    | 19.7   | 2.66   |
| 8                                                                                                            | 15.4    | 36.2    | 28.6    | 28.5    | 18.3    | 25.4   | 8.47   |
| 24                                                                                                           | 14.6    | 31.2    | 16.6    | 18.2    | 8.97    | 17.9   | 8.21   |
| 48                                                                                                           |         |         |         | <0.025  | 0.0510  | 0.0255 | 0.0361 |
| 72                                                                                                           |         |         |         | 0.168   | 0.0883  | 0.128  | 0.0564 |
| Estimates of mean based on approximation that values below LLOQ (0.025 $\mu\text{g/mL}$ ) are equal to zero. |         |         |         |         |         |        |        |
| N/A: not applicable.                                                                                         |         |         |         |         |         |        |        |

**Table 16A1.** Individual plasma concentrations ( $\mu\text{g/mL}$ ) of sulfoxide metabolite after single (Day 1) and repeated (Day 14 and Day 28) oral administrations of Fexinidazole at the dose of 50 mg/kg/day to male Beagle dogs.

| Time (hour)                                                                                                                                                                                                                                                                                          | ID 2514 | ID 2521 | ID 2529 | Mean  | SD    |
|------------------------------------------------------------------------------------------------------------------------------------------------------------------------------------------------------------------------------------------------------------------------------------------------------|---------|---------|---------|-------|-------|
| Day 1                                                                                                                                                                                                                                                                                                |         |         |         |       |       |
| 0                                                                                                                                                                                                                                                                                                    | <0.025  | <0.025  | <0.025  | N/A   | N/A   |
| 0.5                                                                                                                                                                                                                                                                                                  | 4.3     | 2.21    | 2.54    | 3.02  | 1.12  |
| 1                                                                                                                                                                                                                                                                                                    | 5.04    | 2.65    | 2.95    | 3.55  | 1.3   |
| 2                                                                                                                                                                                                                                                                                                    | 4.36    | 2.45    | 1.97    | 2.93  | 1.26  |
| 4                                                                                                                                                                                                                                                                                                    | 2.51    | 1.64    | 1.01    | 1.72  | 0.753 |
| 8                                                                                                                                                                                                                                                                                                    | 0.375   | 0.402   | 0.207   | 0.328 | 0.106 |
| 24                                                                                                                                                                                                                                                                                                   | 0.241   | 0.239   | 0.353   | 0.278 | 0.065 |
| Day 14                                                                                                                                                                                                                                                                                               |         |         |         |       |       |
| 0                                                                                                                                                                                                                                                                                                    | 0.137   | 0.148   | 0.0686  | 0.118 | 0.043 |
| 0.5                                                                                                                                                                                                                                                                                                  | 2.11    | 1.84    | 1.8     | 1.92  | 0.169 |
| 1                                                                                                                                                                                                                                                                                                    | 2.76    | 2.06    | 1.91    | 2.24  | 0.454 |
| 2                                                                                                                                                                                                                                                                                                    | 2.36    | 1.96    | 1.34    | 1.89  | 0.514 |
| 4                                                                                                                                                                                                                                                                                                    | 1.29    | 0.745   | 0.432   | 0.822 | 0.434 |
| 8                                                                                                                                                                                                                                                                                                    | 0.129   | 0.101   | 0.0654  | 0.099 | 0.032 |
| 24                                                                                                                                                                                                                                                                                                   | <0.025  | 0.0301  | <0.025  | 0.01* | 0.017 |
| Day 28                                                                                                                                                                                                                                                                                               |         |         |         |       |       |
| 0                                                                                                                                                                                                                                                                                                    | <0.025  | <0.025  | <0.025  | N/A   | N/A   |
| 1                                                                                                                                                                                                                                                                                                    | 2.44    | 1.44    | 1.42    | 1.77  | 0.58  |
| 2                                                                                                                                                                                                                                                                                                    | 2.48    | 1.37    | 1.57    | 1.81  | 0.59  |
| 4                                                                                                                                                                                                                                                                                                    | 1.44    | 0.826   | 1.05    | 1.11  | 0.31  |
| 8                                                                                                                                                                                                                                                                                                    | 0.395   | 0.557   | 0.332   | 0.428 | 0.12  |
| 24                                                                                                                                                                                                                                                                                                   | 0.222   | 0.593   | 0.132   | 0.316 | 0.24  |
| <p>Estimates of mean based on approximation that values below LLOQ (0.025 <math>\mu\text{g/mL}</math>) are equal to zero. For values marked *, more than half of the individual levels were below LLOQ; descriptive statistics was reported even if strongly biased.</p> <p>N/A: not applicable.</p> |         |         |         |       |       |

**Table 17A1.** Individual plasma concentrations ( $\mu\text{g/mL}$ ) of sulfoxide after single (Day 1) and repeated (Day 14 and Day 28) oral administrations of Fexinidazole at the dose of 50 mg/kg/day to female Beagle dogs.

| Time (hour)                                                                                                  | ID 2562 | ID 2563 | ID 2576 | Mean  | SD    |
|--------------------------------------------------------------------------------------------------------------|---------|---------|---------|-------|-------|
| Day 1                                                                                                        |         |         |         |       |       |
| 0                                                                                                            | <0.025  | <0.025  | <0.025  | N/A   | N/A   |
| 0.5                                                                                                          | 1.89    | 3.25    | 3.09    | 2.74  | 0.74  |
| 1                                                                                                            | 3.45    | 4.82    | 3.49    | 3.92  | 0.78  |
| 2                                                                                                            | 3.6     | 2.86    | 3.06    | 3.17  | 0.38  |
| 4                                                                                                            | 1.91    | 0.991   | 1.5     | 1.47  | 0.46  |
| 8                                                                                                            | 0.813   | 0.115   | 0.476   | 0.468 | 0.35  |
| 24                                                                                                           | 0.426   | <0.025  | 0.376   | 0.267 | 0.23  |
| Day 14                                                                                                       |         |         |         |       |       |
| 0                                                                                                            | 0.191   | 0.229   | <0.025  | 0.14  | 0.12  |
| 0.5                                                                                                          | 2.72    | 2.27    | 2.19    | 2.39  | 0.29  |
| 1                                                                                                            | 3.12    | 2.45    | 2.95    | 2.84  | 0.35  |
| 2                                                                                                            | 2.85    | 3.53    | 4.53    | 3.64  | 0.85  |
| 4                                                                                                            | 1.4     | 1.98    | 2.49    | 1.96  | 0.55  |
| 8                                                                                                            | 0.554   | 0.228   | 0.204   | 0.329 | 0.2   |
| 24                                                                                                           | 0.413   | 0.0831  | <0.025  | 0.165 | 0.22  |
| Day 28                                                                                                       |         |         |         |       |       |
| 0                                                                                                            | <0.025  | <0.025  | <0.025  | N/A   | N/A   |
| 1                                                                                                            | 1.91    | 2.91    | 3.33    | 2.72  | 0.729 |
| 2                                                                                                            | 1.7     | 2.39    | 2.32    | 2.14  | 0.38  |
| 4                                                                                                            | 0.554   | 1.35    | 0.728   | 0.877 | 0.418 |
| 8                                                                                                            | 0.0493  | 0.113   | 0.0999  | 0.087 | 0.034 |
| 24                                                                                                           | 0.0439  | 0.0851  | 0.0532  | 0.061 | 0.022 |
| Estimates of mean based on approximation that values below LLOQ (0.025 $\mu\text{g/mL}$ ) are equal to zero. |         |         |         |       |       |
| N/A: not applicable.                                                                                         |         |         |         |       |       |

**Table 18A1.** Individual plasma concentrations ( $\mu\text{g/mL}$ ) of sulfoxide metabolite after single (Day 1) and repeated (Day 14 and Day 28) oral administrations of Fexinidazole at the dose of 200 mg/kg/day to male Beagle dogs.

| Time (hour)                                                                                                  | ID 2515 | ID 2523 | ID 2526 | Mean  | SD   |
|--------------------------------------------------------------------------------------------------------------|---------|---------|---------|-------|------|
| Day 1                                                                                                        |         |         |         |       |      |
| 0                                                                                                            | <0.025  | <0.025  | <0.025  | N/A   | N/A  |
| 0.5                                                                                                          | 5.43    | 0.244   | 4.99    | 3.55  | 2.88 |
| 1                                                                                                            | 6.37    | 3.42    | 7.27    | 5.69  | 2.01 |
| 2                                                                                                            | 5.95    | 7.97    | 8.3     | 7.41  | 1.27 |
| 4                                                                                                            | 3.05    | 4.62    | 3.67    | 3.78  | 0.79 |
| 8                                                                                                            | 0.591   | 0.802   | 0.988   | 0.794 | 0.2  |
| 24                                                                                                           | 1.63    | 1.31    | 2.4     | 1.78  | 0.56 |
| Day 14                                                                                                       |         |         |         |       |      |
| 0                                                                                                            | 0.494   | 1.73    | 1.73    | 1.32  | 0.71 |
| 0.5                                                                                                          | 4.8     | 2.15    | 7.35    | 4.77  | 2.6  |
| 1                                                                                                            | 5.03    | 6.5     | 7.71    | 6.41  | 1.34 |
| 2                                                                                                            | 6.97    | 11.8    | 8.1     | 8.96  | 2.53 |
| 4                                                                                                            | 2.77    | 5.71    | 3.8     | 4.09  | 1.49 |
| 8                                                                                                            | 2.63    | 1.27    | 0.518   | 1.47  | 1.07 |
| 24                                                                                                           | 0.761   | 1.44    | 0.871   | 1.02  | 0.36 |
| Day 28                                                                                                       |         |         |         |       |      |
| 0                                                                                                            | 0.0287  | <0.025  | 0.79    | 0.273 | 0.45 |
| 1                                                                                                            | 6.96    | 4.93    | 4.62    | 5.5   | 1.27 |
| 2                                                                                                            | 6.94    | 5.7     | 3.59    | 5.41  | 1.69 |
| 4                                                                                                            | 3.03    | 2.78    | 2.1     | 2.64  | 0.48 |
| 8                                                                                                            | 1.09    | 0.698   | 0.651   | 0.813 | 0.24 |
| 24                                                                                                           | 1.05    | 2.48    | 1.6     | 1.71  | 0.72 |
| Estimates of mean based on approximation that values below LLOQ (0.025 $\mu\text{g/mL}$ ) are equal to zero. |         |         |         |       |      |
| N/A: not applicable.                                                                                         |         |         |         |       |      |

**Table 19A1.** Individual plasma concentrations ( $\mu\text{g/mL}$ ) of sulfoxide metabolite after single (Day 1) and repeated (Day 14 and Day 28) oral administrations of Fexinidazole at the dose of 200 mg/kg/day to female Beagle dogs.

| Time (hour)          | ID 2561 | ID 2570 | ID 2567 | Mean  | SD    |
|----------------------|---------|---------|---------|-------|-------|
| Day 1                |         |         |         |       |       |
| 0                    | <0.025  | <0.025  | <0.025  | N/A   | N/A   |
| 0.5                  | 4.92    | 5.67    | 9.97    | 6.85  | 2.73  |
| 1                    | 4.64    | 8.38    | 12.8    | 8.61  | 4.08  |
| 2                    | 4.76    | 8.13    | 8.5     | 7.13  | 2.06  |
| 4                    | 2.24    | 2.07    | 4.41    | 2.91  | 1.3   |
| 8                    | 0.816   | 0.458   | 2.71    | 1.33  | 1.21  |
| 24                   | 1.43    | 1.11    | 1.02    | 1.19  | 0.22  |
| Day 14               |         |         |         |       |       |
| 0                    | 1.13    | 1.17    | 1.59    | 1.3   | 0.26  |
| 0.5                  | 2.96    | 4.57    | 7.9     | 5.14  | 2.52  |
| 1                    | 4.46    | 7.35    | 9.69    | 7.17  | 2.62  |
| 2                    | 5.32    | 9.03    | 12.7    | 9.02  | 3.69  |
| 4                    | 3.7     | 3.13    | 6.53    | 4.45  | 1.82  |
| 8                    | 0.577   | 0.29    | 2.88    | 1.25  | 1.42  |
| 24                   | 0.223   | 3.24    | 0.131   | 1.2   | 1.77  |
| Day 28               |         |         |         |       |       |
| 0                    | 0.0354  | 0.0876  | 0.0735  | 0.066 | 0.027 |
| 1                    | 5.41    | 5.1     | 5.78    | 5.43  | 0.34  |
| 2                    | 3.9     | 4.58    | 5.06    | 4.51  | 0.583 |
| 4                    | 1.54    | 1.46    | 2.93    | 1.98  | 0.827 |
| 8                    | 1.55    | 0.555   | 0.428   | 0.844 | 0.614 |
| 24                   | 0.156   | 1.73    | 1.09    | 0.992 | 0.792 |
| N/A: not applicable. |         |         |         |       |       |

**Table 20A1.** Individual plasma concentrations ( $\mu\text{g/mL}$ ) of sulfoxide metabolite after single (Day 1) and repeated (Day 14 and Day 28) oral administrations of Fexinidazole at the dose of 800 mg/kg/day to male Beagle dogs.

| Time (hour)                                                                                                  | ID 2517 | ID 2519 | ID 2525 | ID 2528 | ID 2530 | Mean  | SD   |
|--------------------------------------------------------------------------------------------------------------|---------|---------|---------|---------|---------|-------|------|
| Day 1                                                                                                        |         |         |         |         |         |       |      |
| 0                                                                                                            | <0.025  | <0.025  | <0.025  | <0.025  | <0.025  | N/A   | N/A  |
| 0.5                                                                                                          | 17.5    | 7.86    | 4.49    | 8.92    | 6.94    | 9.14  | 5    |
| 1                                                                                                            | 15.4    | 13.4    | 7.39    | 10.1    | 13.7    | 12    | 3.2  |
| 2                                                                                                            | 10.1    | 15.2    | 9.39    | 11.1    | 13.2    | 11.8  | 2.4  |
| 4                                                                                                            | 2.9     | 11.3    | 5.04    | 5.7     | 5.32    | 6.05  | 3.1  |
| 8                                                                                                            | 0.869   | 1.94    | 3.19    | 4.54    | 4.08    | 2.92  | 1.5  |
| 24                                                                                                           | 4.61    | 0.616   | 4.52    | 2.86    | 3.12    | 3.15  | 1.6  |
| Day 14                                                                                                       |         |         |         |         |         |       |      |
| 0                                                                                                            | 1.43    | 0.891   | 1.73    | 4.14    | 4.39    | 2.52  | 1.6  |
| 0.5                                                                                                          | 8.33    | 7.49    | 4.94    | 9.31    | 8.29    | 7.67  | 1.7  |
| 1                                                                                                            | 12.8    | 14.9    | 7.56    | 13.9    | 11.4    | 12.1  | 2.9  |
| 2                                                                                                            | 9.8     | 11.5    | 7.48    | 9.63    | 13.1    | 10.3  | 2.1  |
| 4                                                                                                            | 5.36    | 5.9     | 2.77    | 4.42    | 6.86    | 5.06  | 1.6  |
| 8                                                                                                            | 2.23    | 1.28    | 1.07    | 7.79    | 5.51    | 3.58  | 3    |
| 24                                                                                                           | 6.06    | 1.83    | 3.78    | 4.78    | 4.31    | 4.15  | 1.6  |
| Day 28                                                                                                       |         |         |         |         |         |       |      |
| 0                                                                                                            | <25     | 0.0845  | 0.0566  | 0.0296  | 0.287   | 0.092 | 0.11 |
| 1                                                                                                            | 15.1    | 3.96    | 8.2     | 4.45    | 8.16    | 7.97  | 4.46 |
| 2                                                                                                            | 11.5    | 6.19    | 5.63    | 7.04    | 10.2    | 8.11  | 2.59 |
| 4                                                                                                            | 3.3     | 2.25    | 2.29    | 4.71    | 4.53    | 3.42  | 1.18 |
| 8                                                                                                            | 2.82    | 1.68    | 1.49    | 4.98    | 1.15    | 2.42  | 1.56 |
| 24                                                                                                           | 2.43    | 3.17    | 2.65    | 1.02    | 4.63    | 2.78  | 1.3  |
| 48                                                                                                           |         |         |         | 0.0339  | 0.24    | 0.137 | 0.15 |
| 72                                                                                                           |         |         |         | <0.025  | <0.025  | N/A   | N/A  |
| Estimates of mean based on approximation that values below LLOQ (0.025 $\mu\text{g/mL}$ ) are equal to zero. |         |         |         |         |         |       |      |
| N/A: not applicable.                                                                                         |         |         |         |         |         |       |      |



**Table 21A1.** Individual plasma concentrations ( $\mu\text{g/mL}$ ) of sulfoxide metabolite after single (Day 1) and repeated (Day 14 and Day 28) oral administrations of Fexinidazole at the dose of 800 mg/kg/day to female Beagle dogs.

| Time (hour)          | ID 2564 | ID 2565 | ID 2569 | ID 2571 | ID 2573 | Mean  | SD    |
|----------------------|---------|---------|---------|---------|---------|-------|-------|
| Day 1                |         |         |         |         |         |       |       |
| 0                    | <0.025  | <0.025  | <0.025  | <0.025  | <0.025  | N/A   | N/A   |
| 0.5                  | 11.7    | 7.61    | 9.88    | 4.85    | 5.15    | 7.84  | 2.97  |
| 1                    | 17.4    | 12.8    | 13.8    | 14.7    | 9.22    | 13.6  | 2.98  |
| 2                    | 18.4    | 21.7    | 10.5    | 10.9    | 9.51    | 14.2  | 5.49  |
| 4                    | 9.91    | 17.6    | 4.72    | 5.20    | 4.40    | 8.37  | 5.63  |
| 8                    | 5.49    | 5.67    | 3.92    | 1.54    | 1.47    | 3.62  | 2.05  |
| 24                   | 0.441   | 2.14    | 2.57    | 9.37    | 0.292   | 2.96  | 3.72  |
| Day 14               |         |         |         |         |         |       |       |
| 0                    | 1.10    | 1.59    | 0.0525  | 1.99    | 1.05    | 1.16  | 0.727 |
| 0.5                  | 12.0    | 6.74    | 3.17    | 5.52    | 5.48    | 6.58  | 3.29  |
| 1                    | 21.7    | 11.8    | 12.3    | 9.64    | 9.73    | 13.0  | 4.99  |
| 2                    | 19.2    | 13.2    | 18.2    | 10.5    | 9.43    | 14.1  | 4.43  |
| 4                    | 9.61    | 14.1    | 12.3    | 8.90    | 6.08    | 10.2  | 3.11  |
| 8                    | 6.34    | 9.39    | 4.16    | 5.78    | 5.62    | 6.26  | 1.93  |
| 24                   | 4.36    | 2.71    | 1.17    | 0.264   | 1.77    | 2.05  | 1.57  |
| Day 28               |         |         |         |         |         |       |       |
| 0                    | 0.411   | 0.291   | 0.0769  | 0.558   | 0.284   | 0.324 | 0.178 |
| 1                    | 11.9    | 11.8    | 9.80    | 6.89    | 4.66    | 9.01  | 3.17  |
| 2                    | 9.49    | 13.2    | 7.32    | 7.83    | 4.37    | 8.44  | 3.24  |
| 4                    | 5.24    | 7.58    | 6.09    | 5.08    | 3.71    | 5.54  | 1.42  |
| 8                    | 1.11    | 6.56    | 2.81    | 5.14    | 1.33    | 3.39  | 2.39  |
| 24                   | 1.79    | 5.96    | 0.992   | 1.73    | 1.33    | 2.36  | 2.04  |
| 48                   |         |         |         | <0.025  | <0.025  | N/A   | N/A   |
| 72                   |         |         |         | <0.025  | <0.025  | N/A   | N/A   |
| N/A: not applicable. |         |         |         |         |         |       |       |

**Appendix 2. In-Study Bioanalytical Validation Data****Calibration data**

| <b>Table 1A2. Analytical Performance: Back-Calculated Concentrations (ng/mL) of Fexinidazole Calibration Standard in Dog Plasma for Study Protocol 0505-2007.</b> |                              |                                 |                                 |                                 |                                |                                |                                |                                |                                 |
|-------------------------------------------------------------------------------------------------------------------------------------------------------------------|------------------------------|---------------------------------|---------------------------------|---------------------------------|--------------------------------|--------------------------------|--------------------------------|--------------------------------|---------------------------------|
| <b>Assay Date</b>                                                                                                                                                 | <b>Analytical Run Number</b> | <b>STD.1<br/>5.00<br/>ng/mL</b> | <b>STD.2<br/>10.0<br/>ng/mL</b> | <b>STD.3<br/>50.0<br/>ng/mL</b> | <b>STD.4<br/>100<br/>ng/mL</b> | <b>STD.5<br/>250<br/>ng/mL</b> | <b>STD.6<br/>500<br/>ng/mL</b> | <b>STD.7<br/>900<br/>ng/mL</b> | <b>STD.8<br/>1000<br/>ng/mL</b> |
| 12-Mar-2008                                                                                                                                                       | 1                            | 4.68                            | 10.9                            | *40.5                           | 99.3                           | 258                            | 479                            | 933                            | 981                             |
|                                                                                                                                                                   |                              | 4.94                            | 10.9                            | 44.6                            | 97.7                           | 245                            | 464                            | 970                            | 1040                            |
| 13-Mar-2008                                                                                                                                                       | 2                            | 5.45                            | 9.34                            | 50.7                            | 93.6                           | 238                            | 495                            | 897                            | 1000                            |
|                                                                                                                                                                   |                              | 4.47                            | 10.8                            | 53.9                            | 102                            | 254                            | 492                            | 868                            | 1040                            |
| 13-Mar-2008                                                                                                                                                       | 3                            | 4.5                             | 9.69                            | 46.6                            | 92.5                           | 272                            | 495                            | 869                            | 1060                            |
|                                                                                                                                                                   |                              | 5.77                            | 9.4                             | 50.3                            | 97.5                           | 257                            | 499                            | 950                            | 1020                            |
| 14-Mar-2008                                                                                                                                                       | 4                            | 4.98                            | 10.4                            | 46.7                            | 89.7                           | 250                            | 480                            | 896                            | 998                             |
|                                                                                                                                                                   |                              | 5.03                            | 9.88                            | 44.7                            | 113                            | 264                            | 540                            | *1100                          | 1030                            |
| 21-Mar-2008                                                                                                                                                       | 5                            | 4.92                            | 9.98                            | 52.3                            | 95.5                           | 267                            | 515                            | 901                            | 991                             |
|                                                                                                                                                                   |                              | 5.2                             | 9.73                            | 45.8                            | 90.4                           | 250                            | 472                            | 930                            | 1120                            |
| 26-Mar-2008                                                                                                                                                       | 6                            | 5.33                            | 10.9                            | 49                              | 94.1                           | 244                            | 524                            | 872                            | 1060                            |
|                                                                                                                                                                   |                              | 4.2                             | 11                              | 53.9                            | 96.8                           | 234                            | 509                            | 816                            | 1030                            |
| 26-Mar-2008                                                                                                                                                       | 7                            | 5.01                            | *12.1                           | 46.9                            | 108                            | *201                           | 497                            | 1000                           | 997                             |
|                                                                                                                                                                   |                              | 5.12                            | 9.69                            | 45.4                            | 97.2                           | 256                            | 515                            | 813                            | 1040                            |
| 27-Mar-2008                                                                                                                                                       | 8                            | 5                               | 10                              | 44.8                            | 103                            | 257                            | 554                            | 1010                           | 883                             |
|                                                                                                                                                                   |                              | 4.76                            | 11                              | 55                              | 87.4                           | 258                            | 457                            | 900                            | 951                             |
| 27-Mar-2008                                                                                                                                                       | 9                            | 4.63                            | 9.59                            | 46.1                            | 96.3                           | 267                            | 429                            | 970                            | 912                             |
|                                                                                                                                                                   |                              | 5.48                            | 10.2                            | 48.7                            | 97.8                           | 267                            | 515                            | 956                            | 1080                            |
| 28-Mar-2008                                                                                                                                                       | 10                           | 4.77                            | 10.6                            | 48.3                            | 101                            | 253                            | 491                            | 963                            | 1030                            |
|                                                                                                                                                                   |                              | 5.08                            | 10.1                            | 50.9                            | 90.9                           | 255                            | 508                            | 948                            | 877                             |
| 29-Mar-2008                                                                                                                                                       | 11                           | 4.81                            | 10.7                            | 50.9                            | 85.5                           | 260                            | 528                            | 916                            | 1150                            |
|                                                                                                                                                                   |                              | 5.23                            | 9.49                            | 45.9                            | 88.4                           | 261                            | 487                            | 852                            | 1070                            |
|                                                                                                                                                                   |                              |                                 |                                 |                                 |                                |                                |                                |                                |                                 |
| Mean                                                                                                                                                              |                              | 4.97                            | 10.2                            | 48.6                            | 96.3                           | 256                            | 498                            | 916                            | 1020                            |
| SD                                                                                                                                                                |                              | 0.365                           | 0.581                           | 3.29                            | 6.63                           | 9.72                           | 28.2                           | 55                             | 67.9                            |
| %CV                                                                                                                                                               |                              | 7.3                             | 5.7                             | 6.8                             | 6.9                            | 3.8                            | 5.7                            | 6                              | 6.7                             |
| %Bias                                                                                                                                                             |                              | -0.6                            | 2                               | -2.8                            | -3.7                           | 2.4                            | -0.4                           | 1.8                            | 2                               |
| n                                                                                                                                                                 |                              | 22                              | 21                              | 21                              | 22                             | 21                             | 22                             | 21                             | 22                              |

\*Accuracy more than 15%; excluded from regression analysis.

| <b>Table 2A2. Analytical Performance: Back-Calculated Concentrations (ng/mL) of Sulfone Calibration Standard in Dog Plasma for Study Protocol 0505-2007.</b> |                              |                                 |                                 |                                |                                |                                 |                                 |                                  |                                  |
|--------------------------------------------------------------------------------------------------------------------------------------------------------------|------------------------------|---------------------------------|---------------------------------|--------------------------------|--------------------------------|---------------------------------|---------------------------------|----------------------------------|----------------------------------|
| <b>Assay Date</b>                                                                                                                                            | <b>Analytical Run Number</b> | <b>STD.1<br/>25.0<br/>ng/mL</b> | <b>STD.2<br/>50.0<br/>ng/mL</b> | <b>STD.3<br/>250<br/>ng/mL</b> | <b>STD.4<br/>500<br/>ng/mL</b> | <b>STD.5<br/>2500<br/>ng/mL</b> | <b>STD.6<br/>5000<br/>ng/mL</b> | <b>STD.7<br/>22500<br/>ng/mL</b> | <b>STD.8<br/>25000<br/>ng/mL</b> |
| 12-Mar-2008                                                                                                                                                  | 1                            | 28.5                            | *66.6                           | 241                            | *616                           | *3130                           | 5630                            | *27100                           | 25900                            |
|                                                                                                                                                              |                              | 21.9                            | 49                              | 236                            | 511                            | 2630                            | 4830                            | 21300                            | 23700                            |
| 13-Mar-2008                                                                                                                                                  | 2                            | 27.1                            | 52.1                            | 266                            | 519                            | 2460                            | 5360                            | 19800                            | 22200                            |
|                                                                                                                                                              |                              | 21.1                            | 52.8                            | 273                            | 538                            | 2690                            | 5110                            | 19700                            | 22600                            |
| 13-Mar-2008                                                                                                                                                  | 3                            | 25.1                            | 51.5                            | 237                            | 478                            | 2820                            | 5000                            | 20100                            | 22500                            |
|                                                                                                                                                              |                              | 25.1                            | 46.5                            | 279                            | 524                            | 2810                            | 5220                            | 21400                            | 23200                            |
| 14-Mar-2008                                                                                                                                                  | 4                            | 23.2                            | 56.5                            | 236                            | 469                            | 2850                            | 5010                            | 21400                            | 23600                            |
|                                                                                                                                                              |                              | 26                              | 48.8                            | 218                            | *668                           | 2810                            | *6060                           | 25000                            | 22500                            |
| 21-Mar-2008                                                                                                                                                  | 5                            | 24.9                            | 50.2                            | 267                            | 484                            | 2700                            | 5280                            | 19800                            | 23600                            |
|                                                                                                                                                              |                              | 26.1                            | 44.2                            | 278                            | 488                            | 2610                            | 4990                            | 21000                            | 25400                            |
| 26-Mar-2008                                                                                                                                                  | 6                            | 23.7                            | 56.7                            | 269                            | 493                            | 2650                            | 5290                            | 19300                            | 23100                            |
|                                                                                                                                                              |                              | 24.4                            | *59.3                           | *301                           | 506                            | 2490                            | 5350                            | *18300                           | 22400                            |
| 26-Mar-2008                                                                                                                                                  | 7                            | 22.2                            | 54.7                            | 239                            | 557                            | *1990                           | 4970                            | 20400                            | *20600                           |
|                                                                                                                                                              |                              | 26.1                            | 52.4                            | 240                            | 506                            | 2680                            | 5130                            | *17600                           | 22100                            |
| 27-Mar-2008                                                                                                                                                  | 8                            | 22                              | 50.2                            | 232                            | 539                            | 2730                            | 5640                            | 22100                            | *19400                           |
|                                                                                                                                                              |                              | 26.6                            | 55.8                            | *306                           | 470                            | 2730                            | 4860                            | 19500                            | 21400                            |
| 27-Mar-2008                                                                                                                                                  | 9                            | 23.5                            | 49.5                            | 236                            | 492                            | 2830                            | 4680                            | 21800                            | *19700                           |
|                                                                                                                                                              |                              | 26.6                            | *68.7                           | 260                            | 508                            | 2830                            | 5280                            | 20200                            | 22300                            |
| 28-Mar-2008                                                                                                                                                  | 10                           | 25.2                            | 51.2                            | 252                            | 541                            | 2670                            | 5040                            | 20600                            | 21300                            |
|                                                                                                                                                              |                              | 24.4                            | 49.2                            | 269                            | 483                            | 2680                            | 5250                            | 20500                            | *19300                           |
| 29-Mar-2008                                                                                                                                                  | 11                           | **14.9                          | *39.1                           | 249                            | 433                            | 2780                            | 5570                            | 20100                            | 25400                            |
|                                                                                                                                                              |                              | 25.9                            | 46.9                            | 248                            | 495                            | 2870                            | 5310                            | 20000                            | 23600                            |
|                                                                                                                                                              |                              |                                 |                                 |                                |                                |                                 |                                 |                                  |                                  |
| Mean                                                                                                                                                         |                              | 24.7                            | 51                              | 251                            | 502                            | 2720                            | 5180                            | 20700                            | 23200                            |
| SD                                                                                                                                                           |                              | 1.93                            | 3.47                            | 17.6                           | 29.6                           | 114                             | 258                             | 1310                             | 1320                             |
| %CV                                                                                                                                                          |                              | 7.8                             | 6.8                             | 7                              | 5.9                            | 4.2                             | 5                               | 6.3                              | 5.7                              |
| %Bias                                                                                                                                                        |                              | -1.2                            | 2                               | 0.4                            | 0.4                            | 8.8                             | 3.6                             | -8                               | -7.2                             |
| n                                                                                                                                                            |                              | 21                              | 18                              | 20                             | 20                             | 20                              | 21                              | 19                               | 18                               |
| *Accuracy more than 15%; excluded from regression analysis.                                                                                                  |                              |                                 |                                 |                                |                                |                                 |                                 |                                  |                                  |
| **Accuracy more than 20%; excluded from regression analysis.                                                                                                 |                              |                                 |                                 |                                |                                |                                 |                                 |                                  |                                  |

| <b>Table 3A2. Analytical Performance: Back-Calculated Concentrations (ng/mL) of Sulfoxide Calibration Standard in Dog Plasma for Study Protocol 0505-2007.</b> |                              |                                 |                                 |                                |                                |                                 |                                 |                                  |                                  |
|----------------------------------------------------------------------------------------------------------------------------------------------------------------|------------------------------|---------------------------------|---------------------------------|--------------------------------|--------------------------------|---------------------------------|---------------------------------|----------------------------------|----------------------------------|
| <b>Assay Date</b>                                                                                                                                              | <b>Analytical Run Number</b> | <b>STD.1<br/>25.0<br/>ng/mL</b> | <b>STD.2<br/>50.0<br/>ng/mL</b> | <b>STD.3<br/>250<br/>ng/mL</b> | <b>STD.4<br/>500<br/>ng/mL</b> | <b>STD.5<br/>2500<br/>ng/mL</b> | <b>STD.6<br/>5000<br/>ng/mL</b> | <b>STD.7<br/>22500<br/>ng/mL</b> | <b>STD.8<br/>25000<br/>ng/mL</b> |
| 12-Mar-2008                                                                                                                                                    | 1                            | 29.7                            | *68.8                           | 258                            | *630                           | *3130                           | 5580                            | *27100                           | 26200                            |
|                                                                                                                                                                |                              | 21.4                            | 45.7                            | 240                            | 505                            | 2590                            | 4710                            | 21300                            | 23800                            |
| 13-Mar-2008                                                                                                                                                    | 2                            | 26.7                            | 54.4                            | 266                            | 523                            | 2400                            | 5230                            | 20000                            | 22200                            |
|                                                                                                                                                                |                              | 21                              | 52.3                            | 276                            | 558                            | 2620                            | 5030                            | 19800                            | 22900                            |
| 13-Mar-2008                                                                                                                                                    | 3                            | 24.4                            | 52.3                            | 224                            | 487                            | 2710                            | 4800                            | 20100                            | 22700                            |
|                                                                                                                                                                |                              | 25.1                            | 48.9                            | 285                            | 539                            | 2750                            | 5230                            | 21800                            | 23600                            |
| 14-Mar-2008                                                                                                                                                    | 4                            | 23                              | 57.3                            | 241                            | 483                            | 2760                            | 4850                            | 21300                            | 23800                            |
|                                                                                                                                                                |                              | 25.6                            | 49.7                            | 225                            | *681                           | 2740                            | *6040                           | 25200                            | 22300                            |
| 21-Mar-2008                                                                                                                                                    | 5                            | 25.5                            | 49.9                            | 265                            | 484                            | 2640                            | 5190                            | 19700                            | 23900                            |
|                                                                                                                                                                |                              | 24.7                            | 48.1                            | 273                            | 495                            | 2590                            | 4960                            | 21300                            | 25600                            |
| 26-Mar-2008                                                                                                                                                    | 6                            | 22.8                            | 56.7                            | 261                            | 492                            | 2500                            | 5000                            | *18800                           | 22600                            |
|                                                                                                                                                                |                              | 25.3                            | *60.9                           | *321                           | 552                            | 2540                            | 5480                            | 19200                            | 23500                            |
| 26-Mar-2008                                                                                                                                                    | 7                            | 20.9                            | 56.8                            | 243                            | 560                            | *1930                           | 4870                            | 20200                            | *20000                           |
|                                                                                                                                                                |                              | 26.6                            | 53.2                            | 240                            | 518                            | 2640                            | 5080                            | *17500                           | 21700                            |
| 27-Mar-2008                                                                                                                                                    | 8                            | 21.7                            | 50.1                            | 237                            | 555                            | 2680                            | 5610                            | 21900                            | *19300                           |
|                                                                                                                                                                |                              | 27.1                            | 54.6                            | *303                           | 480                            | 2710                            | 4740                            | 19900                            | 21300                            |
| 27-Mar-2008                                                                                                                                                    | 9                            | 22.4                            | 49                              | 235                            | 516                            | 2800                            | 4680                            | 21300                            | *19500                           |
|                                                                                                                                                                |                              | 27                              | 52.7                            | 269                            | 512                            | 2750                            | 5210                            | 20100                            | 22000                            |
| 28-Mar-2008                                                                                                                                                    | 10                           | 25.4                            | 50.9                            | 258                            | 545                            | 2590                            | 4990                            | 20500                            | 21400                            |
|                                                                                                                                                                |                              | 23.6                            | 51.5                            | 267                            | 492                            | 2660                            | 5210                            | 20400                            | *19200                           |
| 29-Mar-2008                                                                                                                                                    | 11                           | 22.6                            | 49.2                            | 263                            | 456                            | 2720                            | 5500                            | 19600                            | 24600                            |
|                                                                                                                                                                |                              | 27.6                            | 49.2                            | 259                            | 507                            | 2790                            | 5270                            | 19500                            | 23200                            |
|                                                                                                                                                                |                              |                                 |                                 |                                |                                |                                 |                                 |                                  |                                  |
| Mean                                                                                                                                                           |                              | 24.6                            | 51.6                            | 254                            | 513                            | 2660                            | 5110                            | 20700                            | 23200                            |
| SD                                                                                                                                                             |                              | 2.39                            | 3.15                            | 17.4                           | 30.3                           | 103                             | 283                             | 1360                             | 1360                             |
| %CV                                                                                                                                                            |                              | 9.7                             | 6.1                             | 6.9                            | 5.9                            | 3.9                             | 5.5                             | 6.6                              | 5.9                              |
| %Bias                                                                                                                                                          |                              | -1.6                            | 3.2                             | 1.6                            | 2.6                            | 6.4                             | 2.2                             | -8                               | -7.2                             |
| n                                                                                                                                                              |                              | 22                              | 20                              | 20                             | 20                             | 20                              | 21                              | 19                               | 18                               |

\*Accuracy more than 15%; excluded from regression analysis.

| <b>Table 4A2. Calibration Curve Parameters for Fexinidazole Calibration Standards in Dog Plasma for Study Protocol 0505-2007.</b> |                     |              |                  |                      |                   |                   |                               |
|-----------------------------------------------------------------------------------------------------------------------------------|---------------------|--------------|------------------|----------------------|-------------------|-------------------|-------------------------------|
| <b>Run Date</b>                                                                                                                   | <b>Curve Number</b> | <b>Slope</b> | <b>Intercept</b> | <b>R<sup>2</sup></b> | <b>LLOQ ng/mL</b> | <b>ULOQ ng/mL</b> | <b>Regression Footnote(s)</b> |
| 12-Mar-2008                                                                                                                       | 1                   | 0.00403      | 0.00314          | 0.9954               | 5                 | 1000              | 1                             |
| 13-Mar-2008                                                                                                                       | 2                   | 0.00415      | 0.00179          | 0.9959               | 5                 | 1000              | 1                             |
| 13-Mar-2008                                                                                                                       | 3                   | 0.00598      | 0.00208          | 0.9943               | 5                 | 1000              | 1                             |
| 14-Mar-2008                                                                                                                       | 4                   | 0.00552      | 0.00811          | 0.9946               | 5                 | 1000              | 1                             |
| 21-Mar-2008                                                                                                                       | 5                   | 0.00599      | 0.00416          | 0.9959               | 5                 | 1000              | 1                             |
| 26-Mar-2008                                                                                                                       | 6                   | 0.00536      | 0.00265          | 0.9931               | 5                 | 1000              | 1                             |
| 26-Mar-2008                                                                                                                       | 7                   | 0.00562      | 0.00168          | 0.9955               | 5                 | 1000              | 1                             |
| 27-Mar-2008                                                                                                                       | 8                   | 0.00515      | -0.00008         | 0.9911               | 5                 | 1000              | 1                             |
| 27-Mar-2008                                                                                                                       | 9                   | 0.00545      | -0.00013         | 0.993                | 5                 | 1000              | 1                             |
| 28-Mar-2008                                                                                                                       | 10                  | 0.00547      | -0.00093         | 0.9965               | 5                 | 1000              | 1                             |
| 29-Mar-2008                                                                                                                       | 11                  | 0.00448      | 0.00000          | 0.9922               | 5                 | 1000              | 1                             |
|                                                                                                                                   |                     |              |                  |                      |                   |                   |                               |
| Mean                                                                                                                              |                     | 0.00520      | 0.00204          | 0.9943               |                   |                   |                               |
| SD                                                                                                                                |                     | 0.00068      | 0.00256          | 0.0017               |                   |                   |                               |
| %CV                                                                                                                               |                     | 13.2         | 125.1            | 0.2                  |                   |                   |                               |
| n                                                                                                                                 |                     | 11           | 11               | 11                   |                   |                   |                               |
| Regression Footnote(s):                                                                                                           |                     |              |                  |                      |                   |                   |                               |
| 1) Resp. = Slope * Conc. + Intercept                                                                                              |                     |              |                  |                      |                   |                   |                               |

| <b>Table 5A2. Calibration Curve Parameters for Sulfone Calibration Standards in Dog Plasma for Study Protocol 0505-2007.</b> |                     |              |                  |                      |                   |                   |                               |
|------------------------------------------------------------------------------------------------------------------------------|---------------------|--------------|------------------|----------------------|-------------------|-------------------|-------------------------------|
| <b>Run Date</b>                                                                                                              | <b>Curve Number</b> | <b>Slope</b> | <b>Intercept</b> | <b>R<sup>2</sup></b> | <b>LLOQ ng/mL</b> | <b>ULOQ ng/mL</b> | <b>Regression Footnote(s)</b> |
| 12-Mar-2008                                                                                                                  | 1                   | 0.00433      | 0.02697          | 0.9923               | 25                | 25000             | 1                             |
| 13-Mar-2008                                                                                                                  | 2                   | 0.00425      | 0.00502          | 0.9898               | 25                | 25000             | 1                             |
| 13-Mar-2008                                                                                                                  | 3                   | 0.00614      | 0.01536          | 0.9924               | 25                | 25000             | 1                             |
| 14-Mar-2008                                                                                                                  | 4                   | 0.00543      | 0.04225          | 0.9887               | 25                | 25000             | 1                             |
| 21-Mar-2008                                                                                                                  | 5                   | 0.00655      | 0.01189          | 0.9943               | 25                | 25000             | 1                             |
| 26-Mar-2008                                                                                                                  | 6                   | 0.00485      | 0.00781          | 0.9922               | 25                | 25000             | 1                             |
| 26-Mar-2008                                                                                                                  | 7                   | 0.00543      | 0.00947          | 0.992                | 25                | 25000             | 1                             |
| 27-Mar-2008                                                                                                                  | 8                   | 0.00475      | 0.01223          | 0.988                | 25                | 25000             | 1                             |
| 27-Mar-2008                                                                                                                  | 9                   | 0.00516      | 0.01442          | 0.9926               | 25                | 25000             | 1                             |
| 28-Mar-2008                                                                                                                  | 10                  | 0.00512      | 0.00214          | 0.994                | 25                | 25000             | 1                             |
| 29-Mar-2008                                                                                                                  | 11                  | 0.00398      | 0.04711          | 0.9912               | 25                | 25000             | 1                             |
|                                                                                                                              |                     |              |                  |                      |                   |                   |                               |
| Mean                                                                                                                         |                     | 0.00509      | 0.01770          | 0.9916               |                   |                   |                               |
| SD                                                                                                                           |                     | 0.00078      | 0.01484          | 0.002                |                   |                   |                               |
| %CV                                                                                                                          |                     | 15.4         | 83.9             | 0.2                  |                   |                   |                               |
| n                                                                                                                            |                     | 11           | 11               | 11                   |                   |                   |                               |
| Regression Footnote(s):                                                                                                      |                     |              |                  |                      |                   |                   |                               |
| 1) Resp. = Slope * Conc. + Intercept                                                                                         |                     |              |                  |                      |                   |                   |                               |

| <b>Table 6A2. Calibration Curve Parameters for Sulfoxide Calibration Standards in Dog Plasma for Study Protocol 0505-2007.</b> |                     |              |                  |                      |                   |                   |                               |
|--------------------------------------------------------------------------------------------------------------------------------|---------------------|--------------|------------------|----------------------|-------------------|-------------------|-------------------------------|
| <b>Run Date</b>                                                                                                                | <b>Curve Number</b> | <b>Slope</b> | <b>Intercept</b> | <b>R<sup>2</sup></b> | <b>LLOQ ng/mL</b> | <b>ULOQ ng/mL</b> | <b>Regression Footnote(s)</b> |
| 12-Mar-2008                                                                                                                    | 1                   | 0.00385      | 0.01864          | 0.9894               | 25                | 25000             | 1                             |
| 13-Mar-2008                                                                                                                    | 2                   | 0.00376      | 0.01092          | 0.9895               | 25                | 25000             | 1                             |
| 13-Mar-2008                                                                                                                    | 3                   | 0.00541      | 0.01822          | 0.9927               | 25                | 25000             | 1                             |
| 14-Mar-2008                                                                                                                    | 4                   | 0.00492      | 0.04264          | 0.9905               | 25                | 25000             | 1                             |
| 21-Mar-2008                                                                                                                    | 5                   | 0.00578      | 0.00405          | 0.9964               | 25                | 25000             | 1                             |
| 26-Mar-2008                                                                                                                    | 6                   | 0.00446      | 0.01375          | 0.9915               | 25                | 25000             | 1                             |
| 26-Mar-2008                                                                                                                    | 7                   | 0.00533      | 0.00604          | 0.988                | 25                | 25000             | 1                             |
| 27-Mar-2008                                                                                                                    | 8                   | 0.00462      | 0.01543          | 0.9883               | 25                | 25000             | 1                             |
| 27-Mar-2008                                                                                                                    | 9                   | 0.00507      | 0.01603          | 0.9916               | 25                | 25000             | 1                             |
| 28-Mar-2008                                                                                                                    | 10                  | 0.00501      | 0.00873          | 0.994                | 25                | 25000             | 1                             |
| 29-Mar-2008                                                                                                                    | 11                  | 0.00407      | 0.01632          | 0.991                | 25                | 25000             | 1                             |
|                                                                                                                                |                     |              |                  |                      |                   |                   |                               |
| Mean                                                                                                                           |                     | 0.00475      | 0.01553          | 0.9912               |                   |                   |                               |
| SD                                                                                                                             |                     | 0.00066      | 0.01022          | 0.0025               |                   |                   |                               |
| %CV                                                                                                                            |                     | 13.9         | 65.8             | 0.3                  |                   |                   |                               |
| n                                                                                                                              |                     | 11           | 11               | 11                   |                   |                   |                               |
| Regression Footnote(s):                                                                                                        |                     |              |                  |                      |                   |                   |                               |
| 1) Resp. = Slope * Conc. + Intercept                                                                                           |                     |              |                  |                      |                   |                   |                               |

**Table 7A2. Analytical Performance of Fexinidazole Quality Control Samples in Dog Plasma for Study Protocol 0505-2007.**

| Run Date            | Curve Number | QC1<br>15.0 ng/mL | QC2<br>75.0 ng/mL | QC3<br>800 ng/mL | QC3<br>800 ng/mL<br>Dilution=2 | QC4<br>2000 ng/mL<br>Dilution=5 | QC4<br>2000 ng/mL<br>Dilution=10 |
|---------------------|--------------|-------------------|-------------------|------------------|--------------------------------|---------------------------------|----------------------------------|
| 12-Mar-2008         | 1            | 15.5              | 83.5              | 853              |                                |                                 |                                  |
|                     |              | 15.5              | 81.5              | 798              |                                |                                 |                                  |
| 13-Mar-2008         | 2            | 14.7              | 75.9              | 780              |                                |                                 |                                  |
|                     |              | 15.6              | 82.4              | 816              |                                |                                 |                                  |
| 13-Mar-2008         | 3            | 15                | 83.3              | 904              |                                |                                 |                                  |
|                     |              | 15.3              | ~86.5             | 780              |                                |                                 |                                  |
| 14-Mar-2008         | 4            | 14.2              | 79.4              | 822              | 847                            |                                 |                                  |
|                     |              | 15.8              | 83.7              | 898              | 844                            |                                 |                                  |
|                     |              |                   |                   |                  | 775                            |                                 |                                  |
| 21-Mar-2008         | 5            | 16                | 80.5              | 836              | 757                            |                                 |                                  |
|                     |              | 17.8              | ~89.6             | 701              | 912                            |                                 |                                  |
|                     |              |                   |                   |                  | ~1120                          |                                 |                                  |
| 26-Mar-2008         | 6            | 16.8              | 71.7              | 831              |                                |                                 | 2020                             |
|                     |              | 16.7              | 79.2              | 784              |                                |                                 | 2220                             |
|                     |              |                   |                   |                  |                                |                                 | 2000                             |
| 26-Mar-2008         | 7            | 13.7              | 77.5              | 739              |                                | 1950                            |                                  |
|                     |              | 13.5              | 80.6              | 779              |                                | 1980                            |                                  |
|                     |              |                   |                   |                  |                                | 2020                            |                                  |
| 27-Mar-2008         | 8            | ~36.4             | 72.6              | 845              |                                | 2050                            |                                  |
|                     |              | 17                | 78.9              | 838              |                                | 2170                            |                                  |
|                     |              |                   |                   |                  |                                | 2160                            |                                  |
| 27-Mar-2008         | 9            | 15                | 76.3              | 782              |                                | 1890                            |                                  |
|                     |              | 16.1              | 80.6              | 810              |                                | 2130                            |                                  |
|                     |              |                   |                   |                  |                                | 1900                            |                                  |
| 28-Mar-2008         | 10           | 14.5              | 74.6              | 760              |                                | 2010                            |                                  |
|                     |              | 14.9              | 77.9              | 820              |                                | 1940                            |                                  |
|                     |              |                   |                   |                  |                                | 1980                            |                                  |
| 29-Mar-2008         | 11           | 15.3              | 68.4              | 797              |                                | 2100                            |                                  |
|                     |              | 15.4              | 80.5              | 854              |                                | 2130                            |                                  |
|                     |              |                   |                   |                  |                                | 2220                            |                                  |
|                     |              |                   |                   |                  |                                |                                 |                                  |
| Mean                |              | 16.4              | 79.3              | 810              | 876                            | 2040                            | 2080                             |
| SD                  |              | 4.59              | 4.88              | 47.7             | 132                            | 104                             | 122                              |
| %CV                 |              | 28                | 6.2               | 5.9              | 15.1                           | 5.1                             | 5.9                              |
| %Bias               |              | 9.3               | 5.7               | 1.3              | 9.5                            | 2                               | 4                                |
| n                   |              | 22                | 22                | 22               | 6                              | 15                              | 3                                |
| ~ > 15% Theoretical |              |                   |                   |                  |                                |                                 |                                  |



| <b>Table 8A2. Analytical Performance of Sulfone Quality Control Samples in Dog Plasma for Study Protocol 0505-2007.</b> |                     |                           |                          |                            |                                           |                                           |                                            |
|-------------------------------------------------------------------------------------------------------------------------|---------------------|---------------------------|--------------------------|----------------------------|-------------------------------------------|-------------------------------------------|--------------------------------------------|
| <b>Run Date</b>                                                                                                         | <b>Curve Number</b> | <b>QC1<br/>75.0 ng/mL</b> | <b>QC2<br/>750 ng/mL</b> | <b>QC3<br/>20000 ng/mL</b> | <b>QC3<br/>20000 ng/mL<br/>Dilution=2</b> | <b>QC4<br/>50000 ng/mL<br/>Dilution=5</b> | <b>QC4<br/>50000 ng/mL<br/>Dilution=10</b> |
| 12-Mar-2008                                                                                                             | 1                   | ~91.4                     | ~931                     | 22200                      |                                           |                                           |                                            |
|                                                                                                                         |                     | 77.2                      | 788                      | 18900                      |                                           |                                           |                                            |
| 13-Mar-2008                                                                                                             | 2                   | 75.5                      | 783                      | 18100                      |                                           |                                           |                                            |
|                                                                                                                         |                     | 82.8                      | 831                      | 18300                      |                                           |                                           |                                            |
| 13-Mar-2008                                                                                                             | 3                   | 69.4                      | 752                      | 19700                      |                                           |                                           |                                            |
|                                                                                                                         |                     | 79                        | ~881                     | 18000                      |                                           |                                           |                                            |
| 14-Mar-2008                                                                                                             | 4                   | 65.6                      | 853                      | 18400                      | 22700                                     |                                           |                                            |
|                                                                                                                         |                     | 84.6                      | ~946                     | 20100                      | 21900                                     |                                           |                                            |
|                                                                                                                         |                     |                           |                          |                            | 21000                                     |                                           |                                            |
| 21-Mar-2008                                                                                                             | 5                   | 78.8                      | 777                      | 19000                      | 18800                                     |                                           |                                            |
|                                                                                                                         |                     | 85.7                      | ~892                     | ~16500                     | 23000                                     |                                           |                                            |
|                                                                                                                         |                     |                           |                          |                            | ~26900                                    |                                           |                                            |
| 26-Mar-2008                                                                                                             | 6                   | 83.5                      | 709                      | 19700                      |                                           |                                           | 52000                                      |
|                                                                                                                         |                     | ~92.7                     | 799                      | 17800                      |                                           |                                           | ~57600                                     |
|                                                                                                                         |                     |                           |                          |                            |                                           |                                           | 53100                                      |
| 26-Mar-2008                                                                                                             | 7                   | 67.7                      | 740                      | ~16000                     |                                           | 47400                                     |                                            |
|                                                                                                                         |                     | 71                        | 789                      | 17400                      |                                           | 46000                                     |                                            |
|                                                                                                                         |                     |                           |                          |                            |                                           | 49700                                     |                                            |
| 27-Mar-2008                                                                                                             | 8                   | ~604                      | 711                      | 19000                      |                                           | 52500                                     |                                            |
|                                                                                                                         |                     | 82.8                      | 821                      | 19100                      |                                           | 52600                                     |                                            |
|                                                                                                                         |                     |                           |                          |                            |                                           | 54200                                     |                                            |
| 27-Mar-2008                                                                                                             | 9                   | 73.4                      | 734                      | ~16900                     |                                           | 46100                                     |                                            |
|                                                                                                                         |                     | 81.6                      | 791                      | 17500                      |                                           | 50100                                     |                                            |
|                                                                                                                         |                     |                           |                          |                            |                                           | 45700                                     |                                            |
| 28-Mar-2008                                                                                                             | 10                  | 72.4                      | 743                      | ~16400                     |                                           | 48900                                     |                                            |
|                                                                                                                         |                     | 80.4                      | 774                      | 18000                      |                                           | 46200                                     |                                            |
|                                                                                                                         |                     |                           |                          |                            |                                           | 47600                                     |                                            |
| 29-Mar-2008                                                                                                             | 11                  | ~244                      | 656                      | 18500                      |                                           | 52300                                     |                                            |
|                                                                                                                         |                     | 84.6                      | 802                      | 22400                      |                                           | 56200                                     |                                            |
|                                                                                                                         |                     |                           |                          |                            |                                           | 56000                                     |                                            |
|                                                                                                                         |                     |                           |                          |                            |                                           |                                           |                                            |
| Mean                                                                                                                    |                     | 110                       | 796                      | 18500                      | 22400                                     | 50100                                     | 54200                                      |
| SD                                                                                                                      |                     | 116                       | 72.2                     | 1630                       | 2680                                      | 3670                                      | 2970                                       |
| %CV                                                                                                                     |                     | 105.5                     | 9.1                      | 8.8                        | 12                                        | 7.3                                       | 5.5                                        |
| %Bias                                                                                                                   |                     | 46.7                      | 6.1                      | -7.5                       | 12                                        | 0.2                                       | 8.4                                        |
| n                                                                                                                       |                     | 22                        | 22                       | 22                         | 6                                         | 15                                        | 3                                          |

~ &gt; 15% Theoretical

| <b>Table 9A2. Analytical Performance of Sulfoxide Quality Control Samples in Dog Plasma for Study Protocol 0505-2007.</b> |                     |                           |                          |                            |                                           |                                           |                                            |
|---------------------------------------------------------------------------------------------------------------------------|---------------------|---------------------------|--------------------------|----------------------------|-------------------------------------------|-------------------------------------------|--------------------------------------------|
| <b>Run Date</b>                                                                                                           | <b>Curve Number</b> | <b>QC1<br/>75.0 ng/mL</b> | <b>QC2<br/>750 ng/mL</b> | <b>QC3<br/>20000 ng/mL</b> | <b>QC3<br/>20000 ng/mL<br/>Dilution=2</b> | <b>QC4<br/>50000 ng/mL<br/>Dilution=5</b> | <b>QC4<br/>50000 ng/mL<br/>Dilution=10</b> |
| 12-Mar-2008                                                                                                               | 1                   | ~92.0                     | ~937                     | 22400                      |                                           |                                           |                                            |
|                                                                                                                           |                     | 83                        | 780                      | 18800                      |                                           |                                           |                                            |
| 13-Mar-2008                                                                                                               | 2                   | 76                        | 772                      | 18500                      |                                           |                                           |                                            |
|                                                                                                                           |                     | 84.1                      | 827                      | 18600                      |                                           |                                           |                                            |
| 13-Mar-2008                                                                                                               | 3                   | 69                        | 754                      | 20100                      |                                           |                                           |                                            |
|                                                                                                                           |                     | 81                        | ~869                     | 18200                      |                                           |                                           |                                            |
| 14-Mar-2008                                                                                                               | 4                   | 65.9                      | 852                      | 18600                      | 22700                                     |                                           |                                            |
|                                                                                                                           |                     | 88.8                      | ~946                     | 20200                      | 21800                                     |                                           |                                            |
|                                                                                                                           |                     | NA                        | NA                       | NA                         | 21100                                     |                                           |                                            |
| 21-Mar-2008                                                                                                               | 5                   | 77.9                      | 769                      | 19100                      | 18600                                     |                                           |                                            |
|                                                                                                                           |                     | ~90.5                     | 844                      | ~16700                     | 23000                                     |                                           |                                            |
|                                                                                                                           |                     |                           |                          |                            | ~27400                                    |                                           |                                            |
| 26-Mar-2008                                                                                                               | 6                   | 77.8                      | 675                      | 19400                      |                                           |                                           | 50200                                      |
|                                                                                                                           |                     | ~94.3                     | 858                      | 19100                      |                                           |                                           | ~61000                                     |
|                                                                                                                           |                     |                           |                          |                            |                                           |                                           | 56000                                      |
| 26-Mar-2008                                                                                                               | 7                   | 69.6                      | 736                      | ~15800                     |                                           | 47200                                     |                                            |
|                                                                                                                           |                     | 69.9                      | 797                      | 17300                      |                                           | 46200                                     |                                            |
|                                                                                                                           |                     |                           |                          |                            |                                           | 49300                                     |                                            |
| 27-Mar-2008                                                                                                               | 8                   | ~613                      | 710                      | 19100                      |                                           | 53000                                     |                                            |
|                                                                                                                           |                     | 84.3                      | 804                      | 19100                      |                                           | 53700                                     |                                            |
|                                                                                                                           |                     |                           |                          |                            |                                           | 55200                                     |                                            |
| 27-Mar-2008                                                                                                               | 9                   | 73.7                      | 729                      | ~16900                     |                                           | 46300                                     |                                            |
|                                                                                                                           |                     | 79.2                      | 788                      | 17500                      |                                           | 50000                                     |                                            |
|                                                                                                                           |                     |                           |                          |                            |                                           | 46000                                     |                                            |
| 28-Mar-2008                                                                                                               | 10                  | 70.3                      | 735                      | ~16500                     |                                           | 49300                                     |                                            |
|                                                                                                                           |                     | 76.4                      | 773                      | 18100                      |                                           | 47400                                     |                                            |
|                                                                                                                           |                     |                           |                          |                            |                                           | 47900                                     |                                            |
| 29-Mar-2008                                                                                                               | 11                  | 83.2                      | 660                      | 17700                      |                                           | 51900                                     |                                            |
|                                                                                                                           |                     | 83.7                      | 808                      | 22100                      |                                           | 55500                                     |                                            |
|                                                                                                                           |                     |                           |                          |                            |                                           | 55200                                     |                                            |
|                                                                                                                           |                     |                           |                          |                            |                                           |                                           |                                            |
| Mean                                                                                                                      |                     | 104                       | 792                      | 18600                      | 22400                                     | 50300                                     | 55700                                      |
| SD                                                                                                                        |                     | 114                       | 73.7                     | 1630                       | 2900                                      | 3520                                      | 5400                                       |
| %CV                                                                                                                       |                     | 109.6                     | 9.3                      | 8.8                        | 12.9                                      | 7                                         | 9.7                                        |
| %Bias                                                                                                                     |                     | 38.7                      | 5.6                      | -7                         | 12                                        | 0.6                                       | 11.4                                       |
| n                                                                                                                         |                     | 22                        | 22                       | 22                         | 6                                         | 15                                        | 3                                          |
| ~ > 15% Theoretical                                                                                                       |                     |                           |                          |                            |                                           |                                           |                                            |

## ***Appendix 14 Clinical Pathology Methods***

## HEMATOLOGY METHODS

| PARAMETERS                                     | CODE | UNIT                        | METHODS AND INSTRUMENTS                                                                            |
|------------------------------------------------|------|-----------------------------|----------------------------------------------------------------------------------------------------|
| Red blood cells                                | RBC  | $n \times 10^6/\mu\text{L}$ | Laser beam method. "ADVIA 120™ System" Bayer                                                       |
| Hemoglobin                                     | HGB  | g/dL                        | Colorimetric method as cyanmethemoglobin. "ADVIA 120™ System" Bayer                                |
| Hematocrit                                     | HCT  | %                           | Calculated: Wintrobe formulae "ADVIA 120™ System" Bayer                                            |
| Mean corpuscular hemoglobin concentration      | MCHC | g/dL                        | Calculated: Wintrobe formulae "ADVIA 120™ System" Bayer                                            |
| Mean corpuscular volume                        | MCV  | fL                          | Mean of RBC volume histogram x MCV calibration factor. "ADVIA 120™ System" Bayer                   |
| Mean corpuscular hemoglobin                    | MCH  | pg                          | Calculated: Wintrobe formulae "ADVIA 120™ System" Bayer                                            |
| Red cell distribution width                    | RDW  | %                           | Calculated: Standard deviation of RBC volume histogram/MCV (fl) x 100. "ADVIA 120™ System" Bayer   |
| Hemoglobin distribution width                  | HDW  | g/dL                        | Calculated: Standard deviation of RBC HC histogram. "ADVIA 120™ System" Bayer                      |
| Reticulocytes                                  | R    | %                           | Laser beam method with colorimetric reaction for nucleic acids. "ADVIA 120™ System" Bayer          |
| Reticulocytes absolutes                        | RAB  | $n \times 10^9/\text{L}$    | Laser beam method with colorimetric reaction for nucleic acids. "ADVIA 120™ System" Bayer          |
| Mean corpuscular volume of reticulocytes       | MCVr | fL                          | Mean of R volume histogram x MCV calibration factor. "ADVIA 120™ System" Bayer                     |
| Mean hemoglobin concentration of reticulocytes | CHCM | g/dL                        | Mean of R hemoglobin histogram "ADVIA 120™ System" Bayer                                           |
| Cellular hemoglobin of reticulocytes           | CHr  | pg                          | Calculated: Wintrobe formulae "ADVIA 120™ System" Bayer                                            |
| Platelets                                      | PLT  | $n \times 10^3/\mu\text{L}$ | Laser beam method. "ADVIA 120™ System" Bayer                                                       |
| Mean platelet volume                           | MPV  | fL                          | Mean platelet volume histogram "ADVIA 120™ System" Bayer                                           |
| Platelet distribution width                    | PDW  | %                           | Standard deviation of platelet volume histogram/ MPV (fl) x 100 "ADVIA 120™ System" Bayer          |
| Platelet hematocrit                            | PCT  | %                           | Mean platelet volume x PLT. "ADVIA 120™ System" Bayer                                              |
| White blood cells                              | WBC  | $n \times 10^3/\mu\text{L}$ | Laser beam method with "Baso/Lobularity method" and Peroxidase reaction. "ADVIA 120™ System" Bayer |

HEMATOLOGY METHODS (Cont.)

| PARAMETERS                                                                                                                                      | CODE                                     | UNIT                    | METHODS AND INSTRUMENTS                                                                                                       |
|-------------------------------------------------------------------------------------------------------------------------------------------------|------------------------------------------|-------------------------|-------------------------------------------------------------------------------------------------------------------------------|
| WBC differential count:<br>Neutrophils<br>Lymphocytes<br>Eosinophils<br>Basophils<br>Monocytes<br>Large unstained cells                         | N<br>LY<br>E<br>B<br>M<br>LU             | %                       | Peroxidase and Basophil/Lobularity method "ADVIA 120™ System" Bayer                                                           |
| Band Neutrophils<br>Segmented Neutrophils                                                                                                       | BANN<br>SEGN                             |                         | Percentage of Band and Segmented Neutrophils manually calculated on 100 Neutrophils examined at microscopy                    |
| WBC differential count:<br>Neutrophils ABS<br>Lymphocytes ABS<br>Eosinophils ABS<br>Basophils ABS<br>Monocytes ABS<br>Large unstained cells ABS | NAB<br>LYAB<br>EAB<br>BAB<br>MAB<br>LUAB | n x 10 <sup>3</sup> /μL | Peroxidase and Basophil/Lobularity method "ADVIA 120™ System" Bayer                                                           |
| Band Neutrophils ABS<br>Segmented Neutrophils ABS                                                                                               | BAAB<br>SEAB                             |                         | Absolute number of Band and Segmented Neutrophils calculated on percentage of Band and Segmented Neutrophils and value of NAB |
| Prothrombin Time                                                                                                                                | PT                                       | Sec                     | Photometric method. Kit: Dade Behring. Coagulometer "BCS" Dade Behring.                                                       |
| Prothrombin Time Ratio                                                                                                                          | PTr                                      |                         | Calculated parameter                                                                                                          |
| Fibrinogen                                                                                                                                      | FIBR                                     | mg/dL                   | Photometric method. Kit: Dade Behring. Coagulometer "BCS" Dade Behring.                                                       |
| Activated Partial Thromboplastin Time                                                                                                           | PTT                                      | Sec                     | Photometric method. Kit: Dade Behring. Coagulometer "BCS" Dade Behring.                                                       |
| Activated Partial Thromboplastin Time Ratio                                                                                                     | PTTr                                     |                         | Calculated parameter                                                                                                          |

## CLINICAL CHEMISTRY METHODS

| PARAMETERS                 | CODE  | UNIT  | METHODS AND INSTRUMENTS                                                                                                                |
|----------------------------|-------|-------|----------------------------------------------------------------------------------------------------------------------------------------|
| Urea                       | UREA  | mg/dL | Urease - GLDH": enzymatic UV test.<br>Kit: Horiba ABX adapted to the "Pentra 400" analyzer.                                            |
| Creatinine                 | CREA  | mg/dL | Colorimetric complex between the creatinine and the alkaline picrate (Jaffé).<br>Kit: Horiba ABX adapted to the "Pentra 400" analyzer. |
| Aspartate aminotransferase | AST   | IU/L  | UV-test according to IFCC modified method without pyridoxal phosphate.<br>Kit: Horiba ABX adapted to the "Pentra 400" analyzer.        |
| Alanine aminotransferase   | ALT   | IU/L  | UV-test according to IFCC modified method without pyridoxal phosphate.<br>Kit: Horiba ABX adapted to the "Pentra 400" analyzer.        |
| Alkaline phosphatase       | AP    | IU/L  | Kinetic photometric test, according to the IFCC.<br>Kit: Horiba ABX adapted to the "Pentra 400" analyzer.                              |
| G-Glutamyl transferase     | GGT   | IU/L  | Kinetic photometric test according to Szasz modified.<br>Kit: Horiba ABX adapted to the "Pentra 400" analyzer.                         |
| Total bilirubin            | T.BIL | mg/dL | Photometric test using 2,4-dichloroaniline.<br>Kit: Horiba ABX adapted to the "Pentra 400" analyzer.                                   |
| Total proteins             | TPRO  | g/dL  | Biuret reaction. End-point method.<br>Kit: Horiba ABX adapted to the "Pentra 400" analyzer.                                            |
| Albumin                    | ALB.  | g/dL  | Colorimetric determination using bromocresol green.<br>Kit: Horiba ABX adapted to the "Pentra 400" analyzer.                           |
| Globulin                   | GLOB  | g/dL  | Calculated parameter (T.Protein-Albumin) by Xybion.                                                                                    |
| Glucose                    | GLUC  | mg/dL | Enzymatic determination. (Trinder method).<br>Kit: Horiba ABX adapted to the "Pentra 400" analyzer.                                    |
| Triglycerides              | TG    | mg/dL | Enzymatic determination<br>Kit: Horiba ABX adapted to the "Pentra 400" analyzer.                                                       |
| Total Cholesterol          | TCHO  | mg/dL | "CHOD-PAP": enzymatic photometric test.<br>(Trinder's reaction).<br>Kit: Horiba ABX adapted to the "Pentra 400" analyzer.              |
| Calcium                    | Ca    | mg/dL | Photometric test using ortho-cresolphthalein complexone (OPC).<br>Kit: Horiba ABX adapted to the "Pentra 400" analyzer.                |
| Phosphorus                 | PHOS  | mg/dL | UV method using phosphomolybdate<br>Kit: Horiba ABX adapted to the "Pentra 400" analyzer.                                              |
| Sodium                     | Na    | mEq/L | Direct potentiometry ion selective electrodes.<br>ISE module on the "Pentra 400" analyzer                                              |
| Chloride                   | Cl    | mEq/L | Direct potentiometry ion selective electrodes.<br>ISE module on the "Pentra 400" analyzer                                              |
| Potassium                  | K     | mEq/L | Direct potentiometry ion selective electrodes.<br>ISE module on the "Pentra 400" analyzer                                              |
| Albumin/Globulin           | A/G   |       | Calculated parameter by Xybion                                                                                                         |

URINALYSIS METHODS

| PARAMETERS                                                                                    | CODE                                 | UNIT      | METHODS AND INSTRUMENTS                                 |
|-----------------------------------------------------------------------------------------------|--------------------------------------|-----------|---------------------------------------------------------|
| Appearance<br>Limpid<br>Turbid<br>Light Turbid                                                | L<br>T<br>LT                         |           | Turbidimetric method with Urysis 2400 (Roche).          |
| Colour:<br>Yellow<br>Amber<br>Orange<br>Greenish<br>Reddish<br>Brownish<br>Colorless<br>Other | Y<br>A<br>O<br>G<br>R<br>B<br>W<br>O |           | Photometric method with Urysis 2400 (Roche).            |
| Volume                                                                                        | VOL                                  | ml/16h    |                                                         |
| Specific Gravity                                                                              | S.G.                                 |           | Refractometric method with Urysis 2400 (Roche).         |
| pH                                                                                            | pH                                   |           |                                                         |
| Proteins                                                                                      | PRO                                  | Score 0-4 |                                                         |
| Nitrites                                                                                      | NIT                                  | " 0-1     | Semi-quantitative determination with Sticks Urysis 2400 |
| Glucose                                                                                       | GLU                                  | " 0-4     | Cassette                                                |
| Ketones                                                                                       | KETO                                 | " 0-3     | (Roche).                                                |
| Urobilinogen                                                                                  | UBG                                  | " 0-3     |                                                         |
| Bilirubin                                                                                     | BIL                                  | " 0-2     | Photometric method with Urysis 2400 (Roche).            |
| Hemoglobin/Red blood cells                                                                    | ERY                                  | " 0-3     |                                                         |
| White blood cells                                                                             | WBC                                  | " 0-2     |                                                         |

The scoring system is as follows:

| SCORE | PROTEINS<br>mg/dL | NITRITES | GLUCOSE<br>mg/dL | KETONES<br>mg/dL | UROBIL.<br>mg/dL | BILIR.<br>mg/dL | WHITE<br>B.CELLS<br>WBC/ $\mu$ L | HEMOGLOBIN<br>ERYTHROC.<br>RBC/ $\mu$ L |
|-------|-------------------|----------|------------------|------------------|------------------|-----------------|----------------------------------|-----------------------------------------|
| 0     | Absent            | Absent   | Absent           | Up to 5          | Up to 1          | Up to 1         | Up to 25                         | Up to 10                                |
| 1     | Up to 25          | Present  | Up to 50         | Up to 15         | Up to 4          | Up to 3         | Up to 100                        | Up to 50                                |
| 2     | Up to 75          | ...      | Up to 100        | Up to 50         | Up to 8          | Up to 6         | Up to 500                        | Up to 150                               |
| 3     | Up to 150         | ...      | Up to 300        | Up to 150        | Up to 12         | ...             | ...                              | Up to 250                               |
| 4     | Up to 500         | ...      | Up to 1000       | ...              | ...              | ...             | ...                              | ...                                     |

## ***Appendix 15 Pharmacy Documentation***



## Pharmacy Certification

**STUDY NUMBER** : **0505-2007**  
**TEST ITEM** : **Fexinidazole**  
**NOTEBOOK NUMBER(S)** : **19201/B and 19094/D**

### DOCUMENTATION ENCLOSED IN THE NOTEBOOK:

- A. Analysis certificate dated December 18, 2007 issued by Orgasynth Industries for Fexinidazole test item, raw material, Batch No. 3168-07-01/O
- B. Material safety data sheet issued by Orgasynth Industries for Fexinidazole
- C. Certificate of Analysis issued by Sigma-Aldrich for Methylcellulose 400 cP, raw material, Lot No. 125K0196
- D. Certificate of Analysis issued by Sigma-Aldrich for Tween® 80, raw material, Lot No. 1324202
- E. Label's photocopy of Acqua per preparazioni iniettabili (Bieffe Medital S.p.A.), raw material, Lot No. 07G0201
- F. Label's photocopy of Acqua per preparazioni iniettabili (Bieffe Medital S.p.A.), raw material, Lot No. 07K1503
- G. Copy of request cards of test item

### ANALYTICAL DOCUMENTATION:

Requests and Analytical Results issued by Accelera/ADMET/Preclinical Formulation and Accelera/DMPK&ART/Bioanalysis and Analytical Control

### MATERIALS USED FOR THE STUDY:

1. Fexinidazole test item, raw material, Batch No. 3168-07-01/O
2. Methylcellulose 400 cP, raw material, Lot No. 125K0196
3. Tween® 80, raw material, Lot No. 1324202
4. Acqua per preparazioni iniettabili, raw material, Lot No. 07G0201
5. Acqua per preparazioni iniettabili, raw material, Lot No. 07K1503

### PREPARATIONS:

Prepare suspension of Fexinidazole test item, raw material, Lot No. 3168-07-01/O in the vehicle (5% Tween® 80 in 0.5% Methylcellulose 400 cP solution) at the concentration of 5 mg/mL, 20 mg/mL and 80 mg/mL

**CONCENTRATION CHECKS:****Fexinidazole suspensions:**

|          |                                | <b>% of L.A.</b> | <b>Preparation date</b> |
|----------|--------------------------------|------------------|-------------------------|
| 80 mg/mL | Request No. 200800009 (Top)    | 95.92%           | January 28, 2008        |
| 80 mg/mL | Request No. 200800010 (Middle) | 97.38%           | January 28, 2008        |
| 80 mg/mL | Request No. 200800011 (Bottom) | 96.87%           | January 28, 2008        |
| 20 mg/mL | Request No. 200800012 (Top)    | 104.34%          | January 28, 2008        |
| 20 mg/mL | Request No. 200800013 (Middle) | 99.17%           | January 28, 2008        |
| 20 mg/mL | Request No. 200800014 (Bottom) | 93.68%           | January 28, 2008        |
| 5 mg/mL  | Request No. 200800015 (Top)    | 95.89%           | January 28, 2008        |
| 5 mg/mL  | Request No. 200800016 (Middle) | 107.31%          | January 28, 2008        |
| 5 mg/mL  | Request No. 200800017 (Bottom) | 107.93%          | January 28, 2008        |
| 80 mg/mL | Request No. 200800045 (Top)    | 97.94%           | February 22, 2008       |
| 80 mg/mL | Request No. 200800046 (Middle) | 105.62%          | February 22, 2008       |
| 80 mg/mL | Request No. 200800047 (Bottom) | 98.53%           | February 22, 2008       |
| 20 mg/mL | Request No. 200800048 (Top)    | 95.76%           | February 22, 2008       |
| 20 mg/mL | Request No. 200800049 (Middle) | 98.19%           | February 22, 2008       |
| 20 mg/mL | Request No. 200800050 (Bottom) | 95.13%           | February 22, 2008       |
| 5 mg/mL  | Request No. 200800051 (Top)    | 108.04%          | February 22, 2008       |
| 5 mg/mL  | Request No. 200800052 (Middle) | 105.43%          | February 22, 2008       |
| 5 mg/mL  | Request No. 200800053 (Bottom) | 102.30%          | February 22, 2008       |

**STABILITY:****Fexinidazole test item:**

Expire date October 2008 for Fexinidazole, test item, raw material, Lot No. 3168-07-01/O if stored at room temperature protected from light.

**Fexinidazole suspension:**

Stability data indicate that Fexinidazole suspensions in the vehicle (5% Tween® 80 in 0.5% Methylcellulose 400 cP solution) in the range 0.5-100 mg/mL are stable up to 7 days at room temperature and 14 days at +4°C (Nerviano MS 0293-2007-R)

Date: May 20, 2008
